# Supplementary material for: Constitutive activation of cellular immunity underlies the evolution of resistance to infection in Drosophila
Source: eLife. 2020 Dec 24;9:e59095. doi: 10.7554/eLife.59095 (PMC7785293; doi:10.7554/eLife.59095)
Supplement: Figure 1—source data 1. [file elife-59095-fig1-data1.xlsx]

## Sheet: Figure 1A - Raw Data
Figure 1A: Number of flies with and without capsules emerging from vials with and without infection. This dataset is used to calculate encapsulation ability of each population throughout experimental evolution
Generation	Line	Selection_Regime	Treatment	Tube_No	Capsules	Flies
0	Source	Source	Control	1	NA	31
0	Source	Source	Control	2	NA	61
0	Source	Source	Control	3	NA	62
0	Source	Source	Control	4	NA	49
0	Source	Source	Control	5	NA	34
0	Source	Source	Control	6	NA	62
0	Source	Source	Control	7	NA	35
0	Source	Source	Control	8	NA	60
0	Source	Source	Control	9	NA	64
0	Source	Source	Control	10	NA	49
0	Source	Source	NSRef	1	1	6
0	Source	Source	NSRef	2	4	5
0	Source	Source	NSRef	3	4	14
0	Source	Source	NSRef	4	4	12
0	Source	Source	NSRef	5	5	12
0	Source	Source	NSRef	6	6	8
0	Source	Source	NSRef	7	0	33
0	Source	Source	NSRef	8	4	18
0	Source	Source	NSRef	9	2	7
0	Source	Source	NSRef	10	0	3
0	Source	Source	NSRef	11	6	8
0	Source	Source	NSRef	12	3	14
0	Source	Source	NSRef	13	4	7
0	Source	Source	NSRef	14	5	12
0	Source	Source	NSRef	15	3	7
0	Source	Source	NSRef	16	1	8
0	Source	Source	NSRef	17	0	15
0	Source	Source	NSRef	18	1	25
0	Source	Source	NSRef	19	3	5
0	Source	Source	NSRef	20	1	6
0	Source	Source	Control	1	NA	49
0	Source	Source	Control	2	NA	34
0	Source	Source	Control	3	NA	39
0	Source	Source	Control	4	NA	56
0	Source	Source	Control	5	NA	52
0	Source	Source	Control	6	NA	37
0	Source	Source	Control	7	NA	56
0	Source	Source	Control	8	NA	43
0	Source	Source	Control	9	NA	55
0	Source	Source	Control	10	NA	47
0	Source	Source	NSRef	1	1	0
0	Source	Source	NSRef	2	1	2
0	Source	Source	NSRef	3	4	17
0	Source	Source	NSRef	4	5	13
0	Source	Source	NSRef	5	1	11
0	Source	Source	NSRef	6	1	9
0	Source	Source	NSRef	7	1	10
0	Source	Source	NSRef	8	5	16
0	Source	Source	NSRef	9	1	2
0	Source	Source	NSRef	10	1	10
0	Source	Source	NSRef	11	1	1
0	Source	Source	NSRef	12	1	3
0	Source	Source	NSRef	13	0	4
0	Source	Source	NSRef	14	3	10
0	Source	Source	NSRef	15	2	0
0	Source	Source	NSRef	16	3	8
0	Source	Source	NSRef	17	3	12
0	Source	Source	NSRef	18	1	15
0	Source	Source	NSRef	19	5	1
0	Source	Source	NSRef	20	2	4
0	Source	Source	Control	1	NA	31
0	Source	Source	Control	2	NA	7
0	Source	Source	Control	3	NA	12
0	Source	Source	Control	4	NA	34
0	Source	Source	Control	5	NA	19
0	Source	Source	Control	6	NA	20
0	Source	Source	Control	7	NA	5
0	Source	Source	Control	8	NA	30
0	Source	Source	Control	9	NA	28
0	Source	Source	Control	10	NA	41
0	Source	Source	NSRef	1	1	0
0	Source	Source	NSRef	2	0	1
0	Source	Source	NSRef	3	1	1
0	Source	Source	NSRef	4	5	0
0	Source	Source	NSRef	5	3	2
0	Source	Source	NSRef	6	0	3
0	Source	Source	NSRef	7	4	1
0	Source	Source	NSRef	8	0	2
0	Source	Source	NSRef	9	4	1
0	Source	Source	NSRef	10	8	0
0	Source	Source	NSRef	11	2	0
0	Source	Source	NSRef	12	0	2
0	Source	Source	NSRef	13	0	0
0	Source	Source	NSRef	14	2	2
0	Source	Source	NSRef	15	0	0
0	Source	Source	NSRef	16	0	0
0	Source	Source	NSRef	17	0	12
0	Source	Source	NSRef	18	1	0
0	Source	Source	NSRef	19	1	4
0	Source	Source	NSRef	20	1	0
1	C1	No Selection	Control	1	NA	34
1	C1	No Selection	Control	2	NA	43
1	C1	No Selection	Control	3	NA	48
1	C1	No Selection	Control	4	NA	51
1	C1	No Selection	Control	5	NA	51
1	C1	No Selection	Control	6	NA	54
1	C1	No Selection	Control	7	NA	44
1	C1	No Selection	Control	8	NA	50
1	C1	No Selection	Control	9	NA	46
1	C1	No Selection	Control	10	NA	45
1	C1	No Selection	NSRef	1	3	9
1	C1	No Selection	NSRef	2	2	1
1	C1	No Selection	NSRef	3	0	22
1	C1	No Selection	NSRef	4	0	11
1	C1	No Selection	NSRef	5	2	8
1	C1	No Selection	NSRef	6	1	14
1	C1	No Selection	NSRef	7	2	20
1	C1	No Selection	NSRef	8	0	9
1	C1	No Selection	NSRef	9	2	40
1	C1	No Selection	NSRef	10	8	7
1	C1	No Selection	NSRef	11	5	10
1	C1	No Selection	NSRef	12	0	18
1	C1	No Selection	NSRef	13	1	2
1	C1	No Selection	NSRef	14	5	0
1	C1	No Selection	NSRef	15	3	2
1	C1	No Selection	NSRef	16	4	24
1	C1	No Selection	NSRef	17	2	3
1	C1	No Selection	NSRef	18	0	22
1	C1	No Selection	NSRef	19	0	8
1	C1	No Selection	NSRef	20	3	22
1	C2	No Selection	Control	1	NA	44
1	C2	No Selection	Control	2	NA	54
1	C2	No Selection	Control	3	NA	51
1	C2	No Selection	Control	4	NA	42
1	C2	No Selection	Control	5	NA	48
1	C2	No Selection	Control	6	NA	39
1	C2	No Selection	Control	7	NA	51
1	C2	No Selection	Control	8	NA	54
1	C2	No Selection	Control	9	NA	40
1	C2	No Selection	Control	10	NA	49
1	C2	No Selection	NSRef	1	9	2
1	C2	No Selection	NSRef	2	2	12
1	C2	No Selection	NSRef	3	1	1
1	C2	No Selection	NSRef	4	1	8
1	C2	No Selection	NSRef	5	0	31
1	C2	No Selection	NSRef	6	4	3
1	C2	No Selection	NSRef	7	2	1
1	C2	No Selection	NSRef	8	0	8
1	C2	No Selection	NSRef	9	0	35
1	C2	No Selection	NSRef	10	5	8
1	C2	No Selection	NSRef	11	0	37
1	C2	No Selection	NSRef	12	1	6
1	C2	No Selection	NSRef	13	0	7
1	C2	No Selection	NSRef	14	1	11
1	C2	No Selection	NSRef	15	3	14
1	C2	No Selection	NSRef	16	0	31
1	C2	No Selection	NSRef	17	5	0
1	C2	No Selection	NSRef	18	0	8
1	C2	No Selection	NSRef	19	1	0
1	C2	No Selection	NSRef	20	0	20
1	C3	No Selection	Control	1	NA	52
1	C3	No Selection	Control	2	NA	48
1	C3	No Selection	Control	3	NA	56
1	C3	No Selection	Control	4	NA	52
1	C3	No Selection	Control	5	NA	47
1	C3	No Selection	Control	6	NA	46
1	C3	No Selection	Control	7	NA	47
1	C3	No Selection	Control	8	NA	56
1	C3	No Selection	Control	9	NA	43
1	C3	No Selection	Control	10	NA	45
1	C3	No Selection	NSRef	1	0	9
1	C3	No Selection	NSRef	2	3	16
1	C3	No Selection	NSRef	3	1	25
1	C3	No Selection	NSRef	4	1	25
1	C3	No Selection	NSRef	5	0	21
1	C3	No Selection	NSRef	6	0	14
1	C3	No Selection	NSRef	7	1	15
1	C3	No Selection	NSRef	8	0	2
1	C3	No Selection	NSRef	9	0	15
1	C3	No Selection	NSRef	10	1	12
1	C3	No Selection	NSRef	11	1	2
1	C3	No Selection	NSRef	12	0	11
1	C3	No Selection	NSRef	13	0	15
1	C3	No Selection	NSRef	14	1	28
1	C3	No Selection	NSRef	15	2	11
1	C3	No Selection	NSRef	16	2	3
1	C3	No Selection	NSRef	17	2	12
1	C3	No Selection	NSRef	18	0	32
1	C3	No Selection	NSRef	19	0	7
1	C3	No Selection	NSRef	20	0	28
1	NSRef_1	Selection	Control	1	NA	49
1	NSRef_1	Selection	Control	2	NA	30
1	NSRef_1	Selection	Control	3	NA	29
1	NSRef_1	Selection	Control	4	NA	30
1	NSRef_1	Selection	Control	5	NA	35
1	NSRef_1	Selection	Control	6	NA	23
1	NSRef_1	Selection	Control	7	NA	43
1	NSRef_1	Selection	Control	8	NA	23
1	NSRef_1	Selection	Control	9	NA	38
1	NSRef_1	Selection	Control	10	NA	43
1	NSRef_1	Selection	NSRef	1	2	21
1	NSRef_1	Selection	NSRef	2	0	20
1	NSRef_1	Selection	NSRef	3	0	10
1	NSRef_1	Selection	NSRef	4	1	30
1	NSRef_1	Selection	NSRef	5	3	6
1	NSRef_1	Selection	NSRef	6	2	12
1	NSRef_1	Selection	NSRef	7	1	7
1	NSRef_1	Selection	NSRef	8	0	10
1	NSRef_1	Selection	NSRef	9	1	12
1	NSRef_1	Selection	NSRef	10	1	14
1	NSRef_1	Selection	NSRef	11	0	10
1	NSRef_1	Selection	NSRef	12	0	2
1	NSRef_1	Selection	NSRef	13	0	32
1	NSRef_1	Selection	NSRef	14	5	7
1	NSRef_1	Selection	NSRef	15	1	1
1	NSRef_1	Selection	NSRef	16	5	31
1	NSRef_1	Selection	NSRef	17	1	3
1	NSRef_1	Selection	NSRef	18	4	15
1	NSRef_1	Selection	NSRef	19	2	12
1	NSRef_1	Selection	NSRef	20	0	7
1	NSRef_2	Selection	Control	1	NA	31
1	NSRef_2	Selection	Control	2	NA	53
1	NSRef_2	Selection	Control	3	NA	64
1	NSRef_2	Selection	Control	4	NA	34
1	NSRef_2	Selection	Control	5	NA	41
1	NSRef_2	Selection	Control	6	NA	32
1	NSRef_2	Selection	Control	7	NA	38
1	NSRef_2	Selection	Control	8	NA	42
1	NSRef_2	Selection	Control	9	NA	38
1	NSRef_2	Selection	Control	10	NA	55
1	NSRef_2	Selection	NSRef	1	0	2
1	NSRef_2	Selection	NSRef	2	4	1
1	NSRef_2	Selection	NSRef	3	3	3
1	NSRef_2	Selection	NSRef	4	1	6
1	NSRef_2	Selection	NSRef	5	3	34
1	NSRef_2	Selection	NSRef	6	1	13
1	NSRef_2	Selection	NSRef	7	2	8
1	NSRef_2	Selection	NSRef	8	0	47
1	NSRef_2	Selection	NSRef	9	0	5
1	NSRef_2	Selection	NSRef	10	3	11
1	NSRef_2	Selection	NSRef	11	4	15
1	NSRef_2	Selection	NSRef	12	4	10
1	NSRef_2	Selection	NSRef	13	0	35
1	NSRef_2	Selection	NSRef	14	2	11
1	NSRef_2	Selection	NSRef	15	4	35
1	NSRef_2	Selection	NSRef	16	1	6
1	NSRef_2	Selection	NSRef	17	1	15
1	NSRef_2	Selection	NSRef	18	0	10
1	NSRef_2	Selection	NSRef	19	1	28
1	NSRef_2	Selection	NSRef	20	1	6
1	NSRef_3	Selection	Control	1	NA	38
1	NSRef_3	Selection	Control	2	NA	42
1	NSRef_3	Selection	Control	3	NA	41
1	NSRef_3	Selection	Control	4	NA	38
1	NSRef_3	Selection	Control	5	NA	39
1	NSRef_3	Selection	Control	6	NA	38
1	NSRef_3	Selection	Control	7	NA	23
1	NSRef_3	Selection	Control	8	NA	34
1	NSRef_3	Selection	Control	9	NA	35
1	NSRef_3	Selection	Control	10	NA	43
1	NSRef_3	Selection	NSRef	1	4	6
1	NSRef_3	Selection	NSRef	2	0	19
1	NSRef_3	Selection	NSRef	3	0	4
1	NSRef_3	Selection	NSRef	4	4	17
1	NSRef_3	Selection	NSRef	5	0	2
1	NSRef_3	Selection	NSRef	6	0	13
1	NSRef_3	Selection	NSRef	7	2	4
1	NSRef_3	Selection	NSRef	8	1	25
1	NSRef_3	Selection	NSRef	9	0	1
1	NSRef_3	Selection	NSRef	10	0	8
1	NSRef_3	Selection	NSRef	11	2	26
1	NSRef_3	Selection	NSRef	12	0	14
1	NSRef_3	Selection	NSRef	13	0	25
1	NSRef_3	Selection	NSRef	14	0	7
1	NSRef_3	Selection	NSRef	15	2	14
1	NSRef_3	Selection	NSRef	16	0	2
1	NSRef_3	Selection	NSRef	17	5	18
1	NSRef_3	Selection	NSRef	18	2	13
1	NSRef_3	Selection	NSRef	19	1	14
1	NSRef_3	Selection	NSRef	20	2	10
2	C1	No Selection	Control	1	NA	60
2	C1	No Selection	Control	2	NA	51
2	C1	No Selection	Control	3	NA	39
2	C1	No Selection	Control	4	NA	35
2	C1	No Selection	Control	5	NA	41
2	C1	No Selection	Control	6	NA	49
2	C1	No Selection	Control	7	NA	51
2	C1	No Selection	Control	8	NA	49
2	C1	No Selection	Control	9	NA	31
2	C1	No Selection	Control	10	NA	51
2	C1	No Selection	NSRef	1	3	20
2	C1	No Selection	NSRef	2	4	12
2	C1	No Selection	NSRef	3	5	13
2	C1	No Selection	NSRef	4	2	1
2	C1	No Selection	NSRef	5	7	15
2	C1	No Selection	NSRef	6	0	14
2	C1	No Selection	NSRef	7	8	16
2	C1	No Selection	NSRef	8	3	3
2	C1	No Selection	NSRef	9	4	6
2	C1	No Selection	NSRef	10	2	23
2	C1	No Selection	NSRef	11	1	10
2	C1	No Selection	NSRef	12	3	9
2	C1	No Selection	NSRef	13	5	15
2	C1	No Selection	NSRef	14	0	3
2	C1	No Selection	NSRef	15	12	32
2	C1	No Selection	NSRef	16	4	21
2	C1	No Selection	NSRef	17	3	5
2	C1	No Selection	NSRef	18	9	7
2	C1	No Selection	NSRef	19	1	5
2	C1	No Selection	NSRef	20	3	9
2	C2	No Selection	Control	1	NA	58
2	C2	No Selection	Control	2	NA	64
2	C2	No Selection	Control	3	NA	61
2	C2	No Selection	Control	4	NA	59
2	C2	No Selection	Control	5	NA	50
2	C2	No Selection	Control	6	NA	48
2	C2	No Selection	Control	7	NA	56
2	C2	No Selection	Control	8	NA	53
2	C2	No Selection	Control	9	NA	54
2	C2	No Selection	Control	10	NA	53
2	C2	No Selection	NSRef	1	3	9
2	C2	No Selection	NSRef	2	2	0
2	C2	No Selection	NSRef	3	12	11
2	C2	No Selection	NSRef	4	1	1
2	C2	No Selection	NSRef	5	5	9
2	C2	No Selection	NSRef	6	1	5
2	C2	No Selection	NSRef	7	5	5
2	C2	No Selection	NSRef	8	8	6
2	C2	No Selection	NSRef	9	0	57
2	C2	No Selection	NSRef	10	2	2
2	C2	No Selection	NSRef	11	7	5
2	C2	No Selection	NSRef	12	1	24
2	C2	No Selection	NSRef	13	5	19
2	C2	No Selection	NSRef	14	0	3
2	C2	No Selection	NSRef	15	0	0
2	C2	No Selection	NSRef	16	0	58
2	C2	No Selection	NSRef	17	8	9
2	C2	No Selection	NSRef	18	5	5
2	C2	No Selection	NSRef	19	1	0
2	C2	No Selection	NSRef	20	7	3
2	C3	No Selection	Control	1	NA	78
2	C3	No Selection	Control	2	NA	67
2	C3	No Selection	Control	3	NA	41
2	C3	No Selection	Control	4	NA	49
2	C3	No Selection	Control	5	NA	75
2	C3	No Selection	Control	6	NA	63
2	C3	No Selection	Control	7	NA	53
2	C3	No Selection	Control	8	NA	61
2	C3	No Selection	Control	9	NA	54
2	C3	No Selection	Control	10	NA	NA
2	C3	No Selection	NSRef	1	0	1
2	C3	No Selection	NSRef	2	1	12
2	C3	No Selection	NSRef	3	10	11
2	C3	No Selection	NSRef	4	7	10
2	C3	No Selection	NSRef	5	3	3
2	C3	No Selection	NSRef	6	11	17
2	C3	No Selection	NSRef	7	6	27
2	C3	No Selection	NSRef	8	8	30
2	C3	No Selection	NSRef	9	6	12
2	C3	No Selection	NSRef	10	0	37
2	C3	No Selection	NSRef	11	2	6
2	C3	No Selection	NSRef	12	2	2
2	C3	No Selection	NSRef	13	8	13
2	C3	No Selection	NSRef	14	3	0
2	C3	No Selection	NSRef	15	1	3
2	C3	No Selection	NSRef	16	1	4
2	C3	No Selection	NSRef	17	7	13
2	C3	No Selection	NSRef	18	5	22
2	C3	No Selection	NSRef	19	0	2
2	C3	No Selection	NSRef	20	7	3
2	NSRef_1	Selection	Control	1	NA	49
2	NSRef_1	Selection	Control	2	NA	49
2	NSRef_1	Selection	Control	3	NA	47
2	NSRef_1	Selection	Control	4	NA	56
2	NSRef_1	Selection	Control	5	NA	43
2	NSRef_1	Selection	Control	6	NA	38
2	NSRef_1	Selection	Control	7	NA	35
2	NSRef_1	Selection	Control	8	NA	34
2	NSRef_1	Selection	Control	9	NA	44
2	NSRef_1	Selection	Control	10	NA	40
2	NSRef_1	Selection	NSRef	1	4	9
2	NSRef_1	Selection	NSRef	2	0	0
2	NSRef_1	Selection	NSRef	3	4	19
2	NSRef_1	Selection	NSRef	4	12	5
2	NSRef_1	Selection	NSRef	5	0	5
2	NSRef_1	Selection	NSRef	6	3	3
2	NSRef_1	Selection	NSRef	7	6	8
2	NSRef_1	Selection	NSRef	8	3	57
2	NSRef_1	Selection	NSRef	9	0	7
2	NSRef_1	Selection	NSRef	10	1	5
2	NSRef_1	Selection	NSRef	11	3	1
2	NSRef_1	Selection	NSRef	12	3	13
2	NSRef_1	Selection	NSRef	13	5	6
2	NSRef_1	Selection	NSRef	14	0	6
2	NSRef_1	Selection	NSRef	15	2	10
2	NSRef_1	Selection	NSRef	16	0	32
2	NSRef_1	Selection	NSRef	17	2	3
2	NSRef_1	Selection	NSRef	18	4	11
2	NSRef_1	Selection	NSRef	19	4	2
2	NSRef_1	Selection	NSRef	20	5	7
2	NSRef_2	Selection	Control	1	NA	55
2	NSRef_2	Selection	Control	2	NA	38
2	NSRef_2	Selection	Control	3	NA	55
2	NSRef_2	Selection	Control	4	NA	36
2	NSRef_2	Selection	Control	5	NA	46
2	NSRef_2	Selection	Control	6	NA	41
2	NSRef_2	Selection	Control	7	NA	32
2	NSRef_2	Selection	Control	8	NA	43
2	NSRef_2	Selection	Control	9	NA	47
2	NSRef_2	Selection	Control	10	NA	48
2	NSRef_2	Selection	NSRef	1	1	4
2	NSRef_2	Selection	NSRef	2	0	0
2	NSRef_2	Selection	NSRef	3	7	3
2	NSRef_2	Selection	NSRef	4	2	0
2	NSRef_2	Selection	NSRef	5	4	10
2	NSRef_2	Selection	NSRef	6	20	1
2	NSRef_2	Selection	NSRef	7	1	0
2	NSRef_2	Selection	NSRef	8	2	3
2	NSRef_2	Selection	NSRef	9	3	6
2	NSRef_2	Selection	NSRef	10	8	3
2	NSRef_2	Selection	NSRef	11	1	56
2	NSRef_2	Selection	NSRef	12	0	37
2	NSRef_2	Selection	NSRef	13	2	0
2	NSRef_2	Selection	NSRef	14	3	0
2	NSRef_2	Selection	NSRef	15	0	31
2	NSRef_2	Selection	NSRef	16	0	11
2	NSRef_2	Selection	NSRef	17	5	10
2	NSRef_2	Selection	NSRef	18	5	20
2	NSRef_2	Selection	NSRef	19	1	2
2	NSRef_2	Selection	NSRef	20	9	18
2	NSRef_3	Selection	Control	1	NA	58
2	NSRef_3	Selection	Control	2	NA	32
2	NSRef_3	Selection	Control	3	NA	51
2	NSRef_3	Selection	Control	4	NA	35
2	NSRef_3	Selection	Control	5	NA	44
2	NSRef_3	Selection	Control	6	NA	54
2	NSRef_3	Selection	Control	7	NA	42
2	NSRef_3	Selection	Control	8	NA	44
2	NSRef_3	Selection	Control	9	NA	65
2	NSRef_3	Selection	Control	10	NA	22
2	NSRef_3	Selection	NSRef	1	0	1
2	NSRef_3	Selection	NSRef	2	9	33
2	NSRef_3	Selection	NSRef	3	10	6
2	NSRef_3	Selection	NSRef	4	0	62
2	NSRef_3	Selection	NSRef	5	1	1
2	NSRef_3	Selection	NSRef	6	10	6
2	NSRef_3	Selection	NSRef	7	0	13
2	NSRef_3	Selection	NSRef	8	3	16
2	NSRef_3	Selection	NSRef	9	2	0
2	NSRef_3	Selection	NSRef	10	3	3
2	NSRef_3	Selection	NSRef	11	1	10
2	NSRef_3	Selection	NSRef	12	3	14
2	NSRef_3	Selection	NSRef	13	0	2
2	NSRef_3	Selection	NSRef	14	2	2
2	NSRef_3	Selection	NSRef	15	18	13
2	NSRef_3	Selection	NSRef	16	1	2
2	NSRef_3	Selection	NSRef	17	4	3
2	NSRef_3	Selection	NSRef	18	4	2
2	NSRef_3	Selection	NSRef	19	4	9
2	NSRef_3	Selection	NSRef	20	3	7
3	C1	No Selection	Control	1	NA	36
3	C1	No Selection	Control	2	NA	38
3	C1	No Selection	Control	3	NA	31
3	C1	No Selection	Control	4	NA	21
3	C1	No Selection	Control	5	NA	22
3	C1	No Selection	Control	6	NA	45
3	C1	No Selection	Control	7	NA	34
3	C1	No Selection	Control	8	NA	39
3	C1	No Selection	Control	9	NA	56
3	C1	No Selection	Control	10	NA	31
3	C1	No Selection	NSRef	1	0	3
3	C1	No Selection	NSRef	2	0	16
3	C1	No Selection	NSRef	3	0	0
3	C1	No Selection	NSRef	4	2	5
3	C1	No Selection	NSRef	5	2	9
3	C1	No Selection	NSRef	6	0	4
3	C1	No Selection	NSRef	7	1	3
3	C1	No Selection	NSRef	8	0	2
3	C1	No Selection	NSRef	9	1	5
3	C1	No Selection	NSRef	10	0	3
3	C1	No Selection	NSRef	11	1	3
3	C1	No Selection	NSRef	12	0	1
3	C1	No Selection	NSRef	13	2	3
3	C1	No Selection	NSRef	14	2	5
3	C1	No Selection	NSRef	15	0	0
3	C1	No Selection	NSRef	16	1	7
3	C1	No Selection	NSRef	17	0	3
3	C1	No Selection	NSRef	18	1	0
3	C1	No Selection	NSRef	19	1	0
3	C1	No Selection	NSRef	20	0	30
3	C2	No Selection	Control	1	NA	48
3	C2	No Selection	Control	2	NA	44
3	C2	No Selection	Control	3	NA	36
3	C2	No Selection	Control	4	NA	39
3	C2	No Selection	Control	5	NA	27
3	C2	No Selection	Control	6	NA	47
3	C2	No Selection	Control	7	NA	38
3	C2	No Selection	Control	8	NA	54
3	C2	No Selection	Control	9	NA	38
3	C2	No Selection	Control	10	NA	41
3	C2	No Selection	NSRef	1	1	0
3	C2	No Selection	NSRef	2	1	6
3	C2	No Selection	NSRef	3	0	0
3	C2	No Selection	NSRef	4	0	42
3	C2	No Selection	NSRef	5	0	0
3	C2	No Selection	NSRef	6	1	3
3	C2	No Selection	NSRef	7	1	2
3	C2	No Selection	NSRef	8	1	4
3	C2	No Selection	NSRef	9	1	0
3	C2	No Selection	NSRef	10	0	1
3	C2	No Selection	NSRef	11	1	0
3	C2	No Selection	NSRef	12	0	1
3	C2	No Selection	NSRef	13	0	1
3	C2	No Selection	NSRef	14	2	0
3	C2	No Selection	NSRef	15	2	1
3	C2	No Selection	NSRef	16	1	2
3	C2	No Selection	NSRef	17	2	1
3	C2	No Selection	NSRef	18	3	2
3	C2	No Selection	NSRef	19	2	3
3	C2	No Selection	NSRef	20	0	2
3	C3	No Selection	Control	1	NA	34
3	C3	No Selection	Control	2	NA	36
3	C3	No Selection	Control	3	NA	32
3	C3	No Selection	Control	4	NA	36
3	C3	No Selection	Control	5	NA	47
3	C3	No Selection	Control	6	NA	56
3	C3	No Selection	Control	7	NA	56
3	C3	No Selection	Control	8	NA	36
3	C3	No Selection	Control	9	NA	54
3	C3	No Selection	Control	10	NA	46
3	C3	No Selection	NSRef	1	1	3
3	C3	No Selection	NSRef	2	0	3
3	C3	No Selection	NSRef	3	0	3
3	C3	No Selection	NSRef	4	0	1
3	C3	No Selection	NSRef	5	2	14
3	C3	No Selection	NSRef	6	1	4
3	C3	No Selection	NSRef	7	1	3
3	C3	No Selection	NSRef	8	1	1
3	C3	No Selection	NSRef	9	1	2
3	C3	No Selection	NSRef	10	0	1
3	C3	No Selection	NSRef	11	0	0
3	C3	No Selection	NSRef	12	0	1
3	C3	No Selection	NSRef	13	0	3
3	C3	No Selection	NSRef	14	3	5
3	C3	No Selection	NSRef	15	0	3
3	C3	No Selection	NSRef	16	0	1
3	C3	No Selection	NSRef	17	2	0
3	C3	No Selection	NSRef	18	2	2
3	C3	No Selection	NSRef	19	0	0
3	C3	No Selection	NSRef	20	NA	NA
3	NSRef_1	Selection	Control	1	NA	45
3	NSRef_1	Selection	Control	2	NA	38
3	NSRef_1	Selection	Control	3	NA	51
3	NSRef_1	Selection	Control	4	NA	34
3	NSRef_1	Selection	Control	5	NA	41
3	NSRef_1	Selection	Control	6	NA	28
3	NSRef_1	Selection	Control	7	NA	36
3	NSRef_1	Selection	Control	8	NA	26
3	NSRef_1	Selection	Control	9	NA	31
3	NSRef_1	Selection	Control	10	NA	28
3	NSRef_1	Selection	NSRef	1	2	16
3	NSRef_1	Selection	NSRef	2	2	5
3	NSRef_1	Selection	NSRef	3	2	1
3	NSRef_1	Selection	NSRef	4	9	3
3	NSRef_1	Selection	NSRef	5	3	2
3	NSRef_1	Selection	NSRef	6	1	0
3	NSRef_1	Selection	NSRef	7	1	2
3	NSRef_1	Selection	NSRef	8	0	23
3	NSRef_1	Selection	NSRef	9	6	6
3	NSRef_1	Selection	NSRef	10	0	1
3	NSRef_1	Selection	NSRef	11	0	1
3	NSRef_1	Selection	NSRef	12	0	19
3	NSRef_1	Selection	NSRef	13	2	3
3	NSRef_1	Selection	NSRef	14	0	3
3	NSRef_1	Selection	NSRef	15	2	0
3	NSRef_1	Selection	NSRef	16	6	9
3	NSRef_1	Selection	NSRef	17	2	39
3	NSRef_1	Selection	NSRef	18	0	7
3	NSRef_1	Selection	NSRef	19	1	9
3	NSRef_1	Selection	NSRef	20	0	26
3	NSRef_2	Selection	Control	1	NA	33
3	NSRef_2	Selection	Control	2	NA	41
3	NSRef_2	Selection	Control	3	NA	50
3	NSRef_2	Selection	Control	4	NA	37
3	NSRef_2	Selection	Control	5	NA	39
3	NSRef_2	Selection	Control	6	NA	43
3	NSRef_2	Selection	Control	7	NA	35
3	NSRef_2	Selection	Control	8	NA	38
3	NSRef_2	Selection	Control	9	NA	42
3	NSRef_2	Selection	Control	10	NA	39
3	NSRef_2	Selection	NSRef	1	4	1
3	NSRef_2	Selection	NSRef	2	1	1
3	NSRef_2	Selection	NSRef	3	0	0
3	NSRef_2	Selection	NSRef	4	0	3
3	NSRef_2	Selection	NSRef	5	3	8
3	NSRef_2	Selection	NSRef	6	7	14
3	NSRef_2	Selection	NSRef	7	5	1
3	NSRef_2	Selection	NSRef	8	0	47
3	NSRef_2	Selection	NSRef	9	2	3
3	NSRef_2	Selection	NSRef	10	1	1
3	NSRef_2	Selection	NSRef	11	3	8
3	NSRef_2	Selection	NSRef	12	6	6
3	NSRef_2	Selection	NSRef	13	0	21
3	NSRef_2	Selection	NSRef	14	1	10
3	NSRef_2	Selection	NSRef	15	1	13
3	NSRef_2	Selection	NSRef	16	1	11
3	NSRef_2	Selection	NSRef	17	8	0
3	NSRef_2	Selection	NSRef	18	4	3
3	NSRef_2	Selection	NSRef	19	1	0
3	NSRef_2	Selection	NSRef	20	1	1
3	NSRef_3	Selection	Control	1	NA	33
3	NSRef_3	Selection	Control	2	NA	45
3	NSRef_3	Selection	Control	3	NA	26
3	NSRef_3	Selection	Control	4	NA	47
3	NSRef_3	Selection	Control	5	NA	52
3	NSRef_3	Selection	Control	6	NA	39
3	NSRef_3	Selection	Control	7	NA	44
3	NSRef_3	Selection	Control	8	NA	40
3	NSRef_3	Selection	Control	9	NA	50
3	NSRef_3	Selection	Control	10	NA	30
3	NSRef_3	Selection	NSRef	1	1	2
3	NSRef_3	Selection	NSRef	2	3	7
3	NSRef_3	Selection	NSRef	3	1	1
3	NSRef_3	Selection	NSRef	4	0	4
3	NSRef_3	Selection	NSRef	5	0	12
3	NSRef_3	Selection	NSRef	6	1	7
3	NSRef_3	Selection	NSRef	7	7	9
3	NSRef_3	Selection	NSRef	8	1	1
3	NSRef_3	Selection	NSRef	9	2	6
3	NSRef_3	Selection	NSRef	10	0	26
3	NSRef_3	Selection	NSRef	11	2	20
3	NSRef_3	Selection	NSRef	12	0	1
3	NSRef_3	Selection	NSRef	13	0	23
3	NSRef_3	Selection	NSRef	14	1	9
3	NSRef_3	Selection	NSRef	15	4	2
3	NSRef_3	Selection	NSRef	16	2	0
3	NSRef_3	Selection	NSRef	17	2	10
3	NSRef_3	Selection	NSRef	18	0	8
3	NSRef_3	Selection	NSRef	19	3	11
3	NSRef_3	Selection	NSRef	20	2	0
4	C1	No Selection	Control	1	NA	54
4	C1	No Selection	Control	2	NA	55
4	C1	No Selection	Control	3	NA	46
4	C1	No Selection	Control	4	NA	61
4	C1	No Selection	Control	5	NA	63
4	C1	No Selection	Control	6	NA	60
4	C1	No Selection	Control	7	NA	69
4	C1	No Selection	Control	8	NA	54
4	C1	No Selection	Control	9	NA	50
4	C1	No Selection	Control	10	NA	NA
4	C1	No Selection	NSRef	1	0	4
4	C1	No Selection	NSRef	2	2	2
4	C1	No Selection	NSRef	3	2	2
4	C1	No Selection	NSRef	4	1	9
4	C1	No Selection	NSRef	5	3	4
4	C1	No Selection	NSRef	6	0	66
4	C1	No Selection	NSRef	7	0	0
4	C1	No Selection	NSRef	8	1	4
4	C1	No Selection	NSRef	9	1	0
4	C1	No Selection	NSRef	10	6	8
4	C1	No Selection	NSRef	11	1	2
4	C1	No Selection	NSRef	12	0	0
4	C1	No Selection	NSRef	13	1	6
4	C1	No Selection	NSRef	14	0	46
4	C1	No Selection	NSRef	15	1	17
4	C1	No Selection	NSRef	16	0	9
4	C1	No Selection	NSRef	17	5	2
4	C1	No Selection	NSRef	18	NA	NA
4	C1	No Selection	NSRef	19	NA	NA
4	C1	No Selection	NSRef	20	NA	NA
4	C2	No Selection	Control	1	NA	27
4	C2	No Selection	Control	2	NA	60
4	C2	No Selection	Control	3	NA	55
4	C2	No Selection	Control	4	NA	41
4	C2	No Selection	Control	5	NA	46
4	C2	No Selection	Control	6	NA	33
4	C2	No Selection	Control	7	NA	44
4	C2	No Selection	Control	8	NA	43
4	C2	No Selection	Control	9	NA	37
4	C2	No Selection	Control	10	NA	46
4	C2	No Selection	NSRef	1	3	5
4	C2	No Selection	NSRef	2	4	1
4	C2	No Selection	NSRef	3	1	9
4	C2	No Selection	NSRef	4	0	30
4	C2	No Selection	NSRef	5	1	3
4	C2	No Selection	NSRef	6	0	51
4	C2	No Selection	NSRef	7	0	2
4	C2	No Selection	NSRef	8	4	7
4	C2	No Selection	NSRef	9	1	7
4	C2	No Selection	NSRef	10	2	4
4	C2	No Selection	NSRef	11	1	1
4	C2	No Selection	NSRef	12	2	8
4	C2	No Selection	NSRef	13	1	1
4	C2	No Selection	NSRef	14	0	2
4	C2	No Selection	NSRef	15	2	3
4	C2	No Selection	NSRef	16	6	12
4	C2	No Selection	NSRef	17	0	18
4	C2	No Selection	NSRef	18	0	12
4	C2	No Selection	NSRef	19	0	0
4	C2	No Selection	NSRef	20	2	15
4	C3	No Selection	Control	1	NA	64
4	C3	No Selection	Control	2	NA	68
4	C3	No Selection	Control	3	NA	51
4	C3	No Selection	Control	4	NA	40
4	C3	No Selection	Control	5	NA	56
4	C3	No Selection	Control	6	NA	45
4	C3	No Selection	Control	7	NA	56
4	C3	No Selection	Control	8	NA	49
4	C3	No Selection	Control	9	NA	65
4	C3	No Selection	Control	10	NA	58
4	C3	No Selection	NSRef	1	2	1
4	C3	No Selection	NSRef	2	3	1
4	C3	No Selection	NSRef	3	2	14
4	C3	No Selection	NSRef	4	0	15
4	C3	No Selection	NSRef	5	0	4
4	C3	No Selection	NSRef	6	3	4
4	C3	No Selection	NSRef	7	1	4
4	C3	No Selection	NSRef	8	0	4
4	C3	No Selection	NSRef	9	3	2
4	C3	No Selection	NSRef	10	0	9
4	C3	No Selection	NSRef	11	0	21
4	C3	No Selection	NSRef	12	0	4
4	C3	No Selection	NSRef	13	1	12
4	C3	No Selection	NSRef	14	4	2
4	C3	No Selection	NSRef	15	3	0
4	C3	No Selection	NSRef	16	4	1
4	C3	No Selection	NSRef	17	0	0
4	C3	No Selection	NSRef	18	NA	NA
4	C3	No Selection	NSRef	19	NA	NA
4	C3	No Selection	NSRef	20	NA	NA
4	NSRef_1	Selection	Control	1	NA	64
4	NSRef_1	Selection	Control	2	NA	44
4	NSRef_1	Selection	Control	3	NA	29
4	NSRef_1	Selection	Control	4	NA	36
4	NSRef_1	Selection	Control	5	NA	25
4	NSRef_1	Selection	Control	6	NA	45
4	NSRef_1	Selection	Control	7	NA	39
4	NSRef_1	Selection	Control	8	NA	38
4	NSRef_1	Selection	Control	9	NA	37
4	NSRef_1	Selection	Control	10	NA	51
4	NSRef_1	Selection	NSRef	1	6	8
4	NSRef_1	Selection	NSRef	2	9	12
4	NSRef_1	Selection	NSRef	3	2	15
4	NSRef_1	Selection	NSRef	4	0	19
4	NSRef_1	Selection	NSRef	5	0	6
4	NSRef_1	Selection	NSRef	6	0	7
4	NSRef_1	Selection	NSRef	7	8	15
4	NSRef_1	Selection	NSRef	8	8	7
4	NSRef_1	Selection	NSRef	9	8	2
4	NSRef_1	Selection	NSRef	10	1	1
4	NSRef_1	Selection	NSRef	11	12	8
4	NSRef_1	Selection	NSRef	12	2	2
4	NSRef_1	Selection	NSRef	13	9	4
4	NSRef_1	Selection	NSRef	14	0	15
4	NSRef_1	Selection	NSRef	15	3	17
4	NSRef_1	Selection	NSRef	16	4	15
4	NSRef_1	Selection	NSRef	17	3	0
4	NSRef_1	Selection	NSRef	18	7	12
4	NSRef_1	Selection	NSRef	19	1	8
4	NSRef_1	Selection	NSRef	20	1	26
4	NSRef_2	Selection	Control	1	NA	52
4	NSRef_2	Selection	Control	2	NA	30
4	NSRef_2	Selection	Control	3	NA	43
4	NSRef_2	Selection	Control	4	NA	31
4	NSRef_2	Selection	Control	5	NA	38
4	NSRef_2	Selection	Control	6	NA	34
4	NSRef_2	Selection	Control	7	NA	51
4	NSRef_2	Selection	Control	8	NA	29
4	NSRef_2	Selection	Control	9	NA	70
4	NSRef_2	Selection	Control	10	NA	28
4	NSRef_2	Selection	NSRef	1	5	23
4	NSRef_2	Selection	NSRef	2	6	21
4	NSRef_2	Selection	NSRef	3	3	14
4	NSRef_2	Selection	NSRef	4	1	37
4	NSRef_2	Selection	NSRef	5	0	21
4	NSRef_2	Selection	NSRef	6	0	11
4	NSRef_2	Selection	NSRef	7	6	3
4	NSRef_2	Selection	NSRef	8	8	1
4	NSRef_2	Selection	NSRef	9	18	16
4	NSRef_2	Selection	NSRef	10	14	7
4	NSRef_2	Selection	NSRef	11	0	17
4	NSRef_2	Selection	NSRef	12	6	10
4	NSRef_2	Selection	NSRef	13	2	12
4	NSRef_2	Selection	NSRef	14	1	6
4	NSRef_2	Selection	NSRef	15	3	7
4	NSRef_2	Selection	NSRef	16	7	8
4	NSRef_2	Selection	NSRef	17	14	6
4	NSRef_2	Selection	NSRef	18	4	2
4	NSRef_2	Selection	NSRef	19	2	7
4	NSRef_2	Selection	NSRef	20	0	68
4	NSRef_3	Selection	Control	1	NA	44
4	NSRef_3	Selection	Control	2	NA	40
4	NSRef_3	Selection	Control	3	NA	49
4	NSRef_3	Selection	Control	4	NA	39
4	NSRef_3	Selection	Control	5	NA	34
4	NSRef_3	Selection	Control	6	NA	40
4	NSRef_3	Selection	Control	7	NA	39
4	NSRef_3	Selection	Control	8	NA	39
4	NSRef_3	Selection	Control	9	NA	45
4	NSRef_3	Selection	Control	10	NA	44
4	NSRef_3	Selection	NSRef	1	7	30
4	NSRef_3	Selection	NSRef	2	1	21
4	NSRef_3	Selection	NSRef	3	8	7
4	NSRef_3	Selection	NSRef	4	1	1
4	NSRef_3	Selection	NSRef	5	1	25
4	NSRef_3	Selection	NSRef	6	8	9
4	NSRef_3	Selection	NSRef	7	0	24
4	NSRef_3	Selection	NSRef	8	9	10
4	NSRef_3	Selection	NSRef	9	10	6
4	NSRef_3	Selection	NSRef	10	7	9
4	NSRef_3	Selection	NSRef	11	7	19
4	NSRef_3	Selection	NSRef	12	0	34
4	NSRef_3	Selection	NSRef	13	17	15
4	NSRef_3	Selection	NSRef	14	0	58
4	NSRef_3	Selection	NSRef	15	3	6
4	NSRef_3	Selection	NSRef	16	2	7
4	NSRef_3	Selection	NSRef	17	0	44
4	NSRef_3	Selection	NSRef	18	2	34
4	NSRef_3	Selection	NSRef	19	6	8
4	NSRef_3	Selection	NSRef	20	2	4
5	C1	No Selection	Control	1	NA	55
5	C1	No Selection	Control	2	NA	58
5	C1	No Selection	Control	3	NA	46
5	C1	No Selection	Control	4	NA	37
5	C1	No Selection	Control	5	NA	51
5	C1	No Selection	Control	6	NA	55
5	C1	No Selection	Control	7	NA	48
5	C1	No Selection	Control	8	NA	46
5	C1	No Selection	Control	9	NA	72
5	C1	No Selection	Control	10	NA	55
5	C1	No Selection	NSRef	1	0	53
5	C1	No Selection	NSRef	2	1	5
5	C1	No Selection	NSRef	3	0	49
5	C1	No Selection	NSRef	4	3	13
5	C1	No Selection	NSRef	5	2	3
5	C1	No Selection	NSRef	6	0	0
5	C1	No Selection	NSRef	7	0	1
5	C1	No Selection	NSRef	8	2	3
5	C1	No Selection	NSRef	9	2	3
5	C1	No Selection	NSRef	10	1	3
5	C1	No Selection	NSRef	11	2	0
5	C1	No Selection	NSRef	12	0	2
5	C1	No Selection	NSRef	13	1	0
5	C1	No Selection	NSRef	14	5	2
5	C1	No Selection	NSRef	15	1	39
5	C1	No Selection	NSRef	16	1	1
5	C1	No Selection	NSRef	17	0	13
5	C1	No Selection	NSRef	18	1	2
5	C1	No Selection	NSRef	19	2	3
5	C1	No Selection	NSRef	20	4	3
5	C2	No Selection	Control	1	NA	46
5	C2	No Selection	Control	2	NA	36
5	C2	No Selection	Control	3	NA	49
5	C2	No Selection	Control	4	NA	36
5	C2	No Selection	Control	5	NA	31
5	C2	No Selection	Control	6	NA	46
5	C2	No Selection	Control	7	NA	33
5	C2	No Selection	Control	8	NA	27
5	C2	No Selection	Control	9	NA	49
5	C2	No Selection	Control	10	NA	NA
5	C2	No Selection	NSRef	1	0	4
5	C2	No Selection	NSRef	2	0	54
5	C2	No Selection	NSRef	3	0	40
5	C2	No Selection	NSRef	4	0	11
5	C2	No Selection	NSRef	5	1	2
5	C2	No Selection	NSRef	6	1	0
5	C2	No Selection	NSRef	7	2	2
5	C2	No Selection	NSRef	8	2	2
5	C2	No Selection	NSRef	9	0	1
5	C2	No Selection	NSRef	10	0	1
5	C2	No Selection	NSRef	11	0	31
5	C2	No Selection	NSRef	12	0	0
5	C2	No Selection	NSRef	13	1	20
5	C2	No Selection	NSRef	14	2	6
5	C2	No Selection	NSRef	15	0	0
5	C2	No Selection	NSRef	16	1	0
5	C2	No Selection	NSRef	17	1	0
5	C2	No Selection	NSRef	18	1	4
5	C2	No Selection	NSRef	19	1	2
5	C2	No Selection	NSRef	20	0	27
5	C3	No Selection	Control	1	NA	51
5	C3	No Selection	Control	2	NA	31
5	C3	No Selection	Control	3	NA	20
5	C3	No Selection	Control	4	NA	31
5	C3	No Selection	Control	5	NA	40
5	C3	No Selection	Control	6	NA	49
5	C3	No Selection	Control	7	NA	44
5	C3	No Selection	Control	8	NA	18
5	C3	No Selection	Control	9	NA	21
5	C3	No Selection	Control	10	NA	31
5	C3	No Selection	NSRef	1	1	2
5	C3	No Selection	NSRef	2	0	0
5	C3	No Selection	NSRef	3	1	5
5	C3	No Selection	NSRef	4	0	4
5	C3	No Selection	NSRef	5	0	0
5	C3	No Selection	NSRef	6	2	4
5	C3	No Selection	NSRef	7	0	0
5	C3	No Selection	NSRef	8	5	12
5	C3	No Selection	NSRef	9	1	1
5	C3	No Selection	NSRef	10	0	7
5	C3	No Selection	NSRef	11	0	8
5	C3	No Selection	NSRef	12	0	39
5	C3	No Selection	NSRef	13	0	42
5	C3	No Selection	NSRef	14	0	28
5	C3	No Selection	NSRef	15	2	5
5	C3	No Selection	NSRef	16	1	5
5	C3	No Selection	NSRef	17	1	6
5	C3	No Selection	NSRef	18	0	12
5	C3	No Selection	NSRef	19	0	11
5	C3	No Selection	NSRef	20	2	0
5	NSRef_1	Selection	Control	1	NA	42
5	NSRef_1	Selection	Control	2	NA	34
5	NSRef_1	Selection	Control	3	NA	54
5	NSRef_1	Selection	Control	4	NA	33
5	NSRef_1	Selection	Control	5	NA	36
5	NSRef_1	Selection	Control	6	NA	38
5	NSRef_1	Selection	Control	7	NA	44
5	NSRef_1	Selection	Control	8	NA	29
5	NSRef_1	Selection	Control	9	NA	47
5	NSRef_1	Selection	Control	10	NA	34
5	NSRef_1	Selection	NSRef	1	3	0
5	NSRef_1	Selection	NSRef	2	4	0
5	NSRef_1	Selection	NSRef	3	0	3
5	NSRef_1	Selection	NSRef	4	6	2
5	NSRef_1	Selection	NSRef	5	5	0
5	NSRef_1	Selection	NSRef	6	9	2
5	NSRef_1	Selection	NSRef	7	2	4
5	NSRef_1	Selection	NSRef	8	4	2
5	NSRef_1	Selection	NSRef	9	10	3
5	NSRef_1	Selection	NSRef	10	10	1
5	NSRef_1	Selection	NSRef	11	7	1
5	NSRef_1	Selection	NSRef	12	2	2
5	NSRef_1	Selection	NSRef	13	6	1
5	NSRef_1	Selection	NSRef	14	6	0
5	NSRef_1	Selection	NSRef	15	1	2
5	NSRef_1	Selection	NSRef	16	3	0
5	NSRef_1	Selection	NSRef	17	2	0
5	NSRef_1	Selection	NSRef	18	8	1
5	NSRef_1	Selection	NSRef	19	10	0
5	NSRef_1	Selection	NSRef	20	3	0
5	NSRef_2	Selection	Control	1	NA	29
5	NSRef_2	Selection	Control	2	NA	48
5	NSRef_2	Selection	Control	3	NA	39
5	NSRef_2	Selection	Control	4	NA	41
5	NSRef_2	Selection	Control	5	NA	39
5	NSRef_2	Selection	Control	6	NA	42
5	NSRef_2	Selection	Control	7	NA	34
5	NSRef_2	Selection	Control	8	NA	44
5	NSRef_2	Selection	Control	9	NA	52
5	NSRef_2	Selection	Control	10	NA	50
5	NSRef_2	Selection	NSRef	1	2	24
5	NSRef_2	Selection	NSRef	2	0	0
5	NSRef_2	Selection	NSRef	3	6	4
5	NSRef_2	Selection	NSRef	4	0	0
5	NSRef_2	Selection	NSRef	5	10	0
5	NSRef_2	Selection	NSRef	6	2	0
5	NSRef_2	Selection	NSRef	7	3	0
5	NSRef_2	Selection	NSRef	8	2	0
5	NSRef_2	Selection	NSRef	9	10	0
5	NSRef_2	Selection	NSRef	10	5	1
5	NSRef_2	Selection	NSRef	11	4	1
5	NSRef_2	Selection	NSRef	12	5	2
5	NSRef_2	Selection	NSRef	13	14	2
5	NSRef_2	Selection	NSRef	14	3	1
5	NSRef_2	Selection	NSRef	15	6	1
5	NSRef_2	Selection	NSRef	16	16	1
5	NSRef_2	Selection	NSRef	17	4	1
5	NSRef_2	Selection	NSRef	18	2	2
5	NSRef_2	Selection	NSRef	19	5	0
5	NSRef_2	Selection	NSRef	20	2	0
5	NSRef_3	Selection	Control	1	NA	39
5	NSRef_3	Selection	Control	2	NA	46
5	NSRef_3	Selection	Control	3	NA	46
5	NSRef_3	Selection	Control	4	NA	45
5	NSRef_3	Selection	Control	5	NA	44
5	NSRef_3	Selection	Control	6	NA	40
5	NSRef_3	Selection	Control	7	NA	63
5	NSRef_3	Selection	Control	8	NA	31
5	NSRef_3	Selection	Control	9	NA	45
5	NSRef_3	Selection	Control	10	NA	62
5	NSRef_3	Selection	NSRef	1	7	4
5	NSRef_3	Selection	NSRef	2	2	1
5	NSRef_3	Selection	NSRef	3	12	12
5	NSRef_3	Selection	NSRef	4	3	40
5	NSRef_3	Selection	NSRef	5	2	3
5	NSRef_3	Selection	NSRef	6	5	12
5	NSRef_3	Selection	NSRef	7	12	3
5	NSRef_3	Selection	NSRef	8	2	3
5	NSRef_3	Selection	NSRef	9	3	2
5	NSRef_3	Selection	NSRef	10	2	0
5	NSRef_3	Selection	NSRef	11	15	0
5	NSRef_3	Selection	NSRef	12	8	2
5	NSRef_3	Selection	NSRef	13	4	2
5	NSRef_3	Selection	NSRef	14	4	1
5	NSRef_3	Selection	NSRef	15	16	2
5	NSRef_3	Selection	NSRef	16	6	1
5	NSRef_3	Selection	NSRef	17	11	2
5	NSRef_3	Selection	NSRef	18	0	43
5	NSRef_3	Selection	NSRef	19	6	3
5	NSRef_3	Selection	NSRef	20	6	12
6	C1	No Selection	Control	1	NA	53
6	C1	No Selection	Control	2	NA	55
6	C1	No Selection	Control	3	NA	46
6	C1	No Selection	Control	4	NA	57
6	C1	No Selection	Control	5	NA	42
6	C1	No Selection	Control	6	NA	61
6	C1	No Selection	Control	7	NA	60
6	C1	No Selection	Control	8	NA	58
6	C1	No Selection	Control	9	NA	65
6	C1	No Selection	Control	10	NA	53
6	C1	No Selection	NSRef	1	10	8
6	C1	No Selection	NSRef	2	3	2
6	C1	No Selection	NSRef	3	1	10
6	C1	No Selection	NSRef	4	0	13
6	C1	No Selection	NSRef	5	2	3
6	C1	No Selection	NSRef	6	0	4
6	C1	No Selection	NSRef	7	2	6
6	C1	No Selection	NSRef	8	1	3
6	C1	No Selection	NSRef	9	2	6
6	C1	No Selection	NSRef	10	2	0
6	C1	No Selection	NSRef	11	0	49
6	C1	No Selection	NSRef	12	5	2
6	C1	No Selection	NSRef	13	1	2
6	C1	No Selection	NSRef	14	4	24
6	C1	No Selection	NSRef	15	0	5
6	C1	No Selection	NSRef	16	9	4
6	C1	No Selection	NSRef	17	6	6
6	C1	No Selection	NSRef	18	3	19
6	C1	No Selection	NSRef	19	1	22
6	C1	No Selection	NSRef	20	2	13
6	C2	No Selection	Control	1	NA	53
6	C2	No Selection	Control	2	NA	42
6	C2	No Selection	Control	3	NA	46
6	C2	No Selection	Control	4	NA	49
6	C2	No Selection	Control	5	NA	61
6	C2	No Selection	Control	6	NA	65
6	C2	No Selection	Control	7	NA	52
6	C2	No Selection	Control	8	NA	60
6	C2	No Selection	Control	9	NA	54
6	C2	No Selection	Control	10	NA	43
6	C2	No Selection	NSRef	1	0	50
6	C2	No Selection	NSRef	2	7	2
6	C2	No Selection	NSRef	3	1	4
6	C2	No Selection	NSRef	4	1	1
6	C2	No Selection	NSRef	5	6	7
6	C2	No Selection	NSRef	6	2	23
6	C2	No Selection	NSRef	7	0	1
6	C2	No Selection	NSRef	8	2	1
6	C2	No Selection	NSRef	9	4	9
6	C2	No Selection	NSRef	10	2	2
6	C2	No Selection	NSRef	11	0	1
6	C2	No Selection	NSRef	12	4	2
6	C2	No Selection	NSRef	13	1	1
6	C2	No Selection	NSRef	14	17	2
6	C2	No Selection	NSRef	15	3	3
6	C2	No Selection	NSRef	16	9	3
6	C2	No Selection	NSRef	17	0	64
6	C2	No Selection	NSRef	18	2	2
6	C2	No Selection	NSRef	19	1	23
6	C2	No Selection	NSRef	20	0	2
6	C3	No Selection	Control	1	NA	58
6	C3	No Selection	Control	2	NA	31
6	C3	No Selection	Control	3	NA	32
6	C3	No Selection	Control	4	NA	48
6	C3	No Selection	Control	5	NA	43
6	C3	No Selection	Control	6	NA	45
6	C3	No Selection	Control	7	NA	48
6	C3	No Selection	Control	8	NA	30
6	C3	No Selection	Control	9	NA	49
6	C3	No Selection	Control	10	NA	NA
6	C3	No Selection	NSRef	1	3	1
6	C3	No Selection	NSRef	2	2	3
6	C3	No Selection	NSRef	3	4	12
6	C3	No Selection	NSRef	4	1	15
6	C3	No Selection	NSRef	5	2	0
6	C3	No Selection	NSRef	6	2	4
6	C3	No Selection	NSRef	7	4	4
6	C3	No Selection	NSRef	8	7	6
6	C3	No Selection	NSRef	9	2	2
6	C3	No Selection	NSRef	10	2	0
6	C3	No Selection	NSRef	11	0	0
6	C3	No Selection	NSRef	12	12	6
6	C3	No Selection	NSRef	13	2	4
6	C3	No Selection	NSRef	14	2	6
6	C3	No Selection	NSRef	15	18	3
6	C3	No Selection	NSRef	16	5	1
6	C3	No Selection	NSRef	17	1	0
6	C3	No Selection	NSRef	18	NA	NA
6	C3	No Selection	NSRef	19	NA	NA
6	C3	No Selection	NSRef	20	NA	NA
6	NSRef_1	Selection	Control	1	NA	40
6	NSRef_1	Selection	Control	2	NA	41
6	NSRef_1	Selection	Control	3	NA	50
6	NSRef_1	Selection	Control	4	NA	49
6	NSRef_1	Selection	Control	5	NA	42
6	NSRef_1	Selection	Control	6	NA	45
6	NSRef_1	Selection	Control	7	NA	47
6	NSRef_1	Selection	Control	8	NA	28
6	NSRef_1	Selection	Control	9	NA	51
6	NSRef_1	Selection	Control	10	NA	39
6	NSRef_1	Selection	NSRef	1	0	2
6	NSRef_1	Selection	NSRef	2	8	1
6	NSRef_1	Selection	NSRef	3	2	0
6	NSRef_1	Selection	NSRef	4	5	1
6	NSRef_1	Selection	NSRef	5	7	1
6	NSRef_1	Selection	NSRef	6	6	2
6	NSRef_1	Selection	NSRef	7	6	6
6	NSRef_1	Selection	NSRef	8	11	3
6	NSRef_1	Selection	NSRef	9	2	2
6	NSRef_1	Selection	NSRef	10	1	0
6	NSRef_1	Selection	NSRef	11	15	9
6	NSRef_1	Selection	NSRef	12	12	14
6	NSRef_1	Selection	NSRef	13	3	0
6	NSRef_1	Selection	NSRef	14	2	36
6	NSRef_1	Selection	NSRef	15	8	0
6	NSRef_1	Selection	NSRef	16	4	6
6	NSRef_1	Selection	NSRef	17	7	15
6	NSRef_1	Selection	NSRef	18	7	15
6	NSRef_1	Selection	NSRef	19	3	7
6	NSRef_1	Selection	NSRef	20	5	1
6	NSRef_2	Selection	Control	1	NA	57
6	NSRef_2	Selection	Control	2	NA	47
6	NSRef_2	Selection	Control	3	NA	57
6	NSRef_2	Selection	Control	4	NA	39
6	NSRef_2	Selection	Control	5	NA	44
6	NSRef_2	Selection	Control	6	NA	61
6	NSRef_2	Selection	Control	7	NA	40
6	NSRef_2	Selection	Control	8	NA	48
6	NSRef_2	Selection	Control	9	NA	51
6	NSRef_2	Selection	Control	10	NA	37
6	NSRef_2	Selection	NSRef	1	2	1
6	NSRef_2	Selection	NSRef	2	0	3
6	NSRef_2	Selection	NSRef	3	1	2
6	NSRef_2	Selection	NSRef	4	1	16
6	NSRef_2	Selection	NSRef	5	8	1
6	NSRef_2	Selection	NSRef	6	0	22
6	NSRef_2	Selection	NSRef	7	21	4
6	NSRef_2	Selection	NSRef	8	3	28
6	NSRef_2	Selection	NSRef	9	1	2
6	NSRef_2	Selection	NSRef	10	0	50
6	NSRef_2	Selection	NSRef	11	6	6
6	NSRef_2	Selection	NSRef	12	13	4
6	NSRef_2	Selection	NSRef	13	1	1
6	NSRef_2	Selection	NSRef	14	12	10
6	NSRef_2	Selection	NSRef	15	0	8
6	NSRef_2	Selection	NSRef	16	1	39
6	NSRef_2	Selection	NSRef	17	7	0
6	NSRef_2	Selection	NSRef	18	1	4
6	NSRef_2	Selection	NSRef	19	9	2
6	NSRef_2	Selection	NSRef	20	3	2
6	NSRef_3	Selection	Control	1	NA	46
6	NSRef_3	Selection	Control	2	NA	38
6	NSRef_3	Selection	Control	3	NA	51
6	NSRef_3	Selection	Control	4	NA	45
6	NSRef_3	Selection	Control	5	NA	59
6	NSRef_3	Selection	Control	6	NA	52
6	NSRef_3	Selection	Control	7	NA	50
6	NSRef_3	Selection	Control	8	NA	51
6	NSRef_3	Selection	Control	9	NA	34
6	NSRef_3	Selection	Control	10	NA	54
6	NSRef_3	Selection	NSRef	1	7	4
6	NSRef_3	Selection	NSRef	2	1	1
6	NSRef_3	Selection	NSRef	3	6	8
6	NSRef_3	Selection	NSRef	4	4	2
6	NSRef_3	Selection	NSRef	5	0	1
6	NSRef_3	Selection	NSRef	6	0	8
6	NSRef_3	Selection	NSRef	7	2	9
6	NSRef_3	Selection	NSRef	8	24	2
6	NSRef_3	Selection	NSRef	9	0	55
6	NSRef_3	Selection	NSRef	10	0	46
6	NSRef_3	Selection	NSRef	11	14	2
6	NSRef_3	Selection	NSRef	12	19	3
6	NSRef_3	Selection	NSRef	13	14	3
6	NSRef_3	Selection	NSRef	14	2	12
6	NSRef_3	Selection	NSRef	15	2	8
6	NSRef_3	Selection	NSRef	16	10	7
6	NSRef_3	Selection	NSRef	17	2	0
6	NSRef_3	Selection	NSRef	18	15	13
6	NSRef_3	Selection	NSRef	19	3	0
6	NSRef_3	Selection	NSRef	20	11	1
7	C1	No Selection	Control	1	NA	39
7	C1	No Selection	Control	2	NA	43
7	C1	No Selection	Control	3	NA	45
7	C1	No Selection	Control	4	NA	55
7	C1	No Selection	Control	5	NA	54
7	C1	No Selection	Control	6	NA	53
7	C1	No Selection	Control	7	NA	64
7	C1	No Selection	Control	8	NA	43
7	C1	No Selection	Control	9	NA	40
7	C1	No Selection	Control	10	NA	56
7	C1	No Selection	NSRef	1	0	6
7	C1	No Selection	NSRef	2	5	4
7	C1	No Selection	NSRef	3	3	3
7	C1	No Selection	NSRef	4	2	6
7	C1	No Selection	NSRef	5	13	2
7	C1	No Selection	NSRef	6	11	13
7	C1	No Selection	NSRef	7	0	12
7	C1	No Selection	NSRef	8	16	19
7	C1	No Selection	NSRef	9	1	16
7	C1	No Selection	NSRef	10	4	7
7	C1	No Selection	NSRef	11	0	7
7	C1	No Selection	NSRef	12	0	33
7	C1	No Selection	NSRef	13	4	42
7	C1	No Selection	NSRef	14	15	2
7	C1	No Selection	NSRef	15	6	7
7	C1	No Selection	NSRef	16	4	10
7	C1	No Selection	NSRef	17	9	10
7	C1	No Selection	NSRef	18	2	9
7	C1	No Selection	NSRef	19	4	5
7	C1	No Selection	NSRef	20	0	59
7	C2	No Selection	Control	1	NA	35
7	C2	No Selection	Control	2	NA	57
7	C2	No Selection	Control	3	NA	57
7	C2	No Selection	Control	4	NA	65
7	C2	No Selection	Control	5	NA	29
7	C2	No Selection	Control	6	NA	54
7	C2	No Selection	Control	7	NA	54
7	C2	No Selection	Control	8	NA	39
7	C2	No Selection	Control	9	NA	55
7	C2	No Selection	Control	10	NA	38
7	C2	No Selection	NSRef	1	10	6
7	C2	No Selection	NSRef	2	3	8
7	C2	No Selection	NSRef	3	1	8
7	C2	No Selection	NSRef	4	6	5
7	C2	No Selection	NSRef	5	10	3
7	C2	No Selection	NSRef	6	7	7
7	C2	No Selection	NSRef	7	1	19
7	C2	No Selection	NSRef	8	0	48
7	C2	No Selection	NSRef	9	2	22
7	C2	No Selection	NSRef	10	6	9
7	C2	No Selection	NSRef	11	4	0
7	C2	No Selection	NSRef	12	0	0
7	C2	No Selection	NSRef	13	5	10
7	C2	No Selection	NSRef	14	4	13
7	C2	No Selection	NSRef	15	11	1
7	C2	No Selection	NSRef	16	0	1
7	C2	No Selection	NSRef	17	13	8
7	C2	No Selection	NSRef	18	6	32
7	C2	No Selection	NSRef	19	0	3
7	C2	No Selection	NSRef	20	3	7
7	C3	No Selection	Control	1	NA	42
7	C3	No Selection	Control	2	NA	32
7	C3	No Selection	Control	3	NA	58
7	C3	No Selection	Control	4	NA	55
7	C3	No Selection	Control	5	NA	28
7	C3	No Selection	Control	6	NA	47
7	C3	No Selection	Control	7	NA	42
7	C3	No Selection	Control	8	NA	42
7	C3	No Selection	Control	9	NA	26
7	C3	No Selection	Control	10	NA	50
7	C3	No Selection	NSRef	1	4	3
7	C3	No Selection	NSRef	2	0	2
7	C3	No Selection	NSRef	3	8	4
7	C3	No Selection	NSRef	4	6	2
7	C3	No Selection	NSRef	5	3	5
7	C3	No Selection	NSRef	6	2	15
7	C3	No Selection	NSRef	7	4	23
7	C3	No Selection	NSRef	8	5	9
7	C3	No Selection	NSRef	9	2	33
7	C3	No Selection	NSRef	10	4	3
7	C3	No Selection	NSRef	11	2	0
7	C3	No Selection	NSRef	12	8	4
7	C3	No Selection	NSRef	13	12	11
7	C3	No Selection	NSRef	14	4	4
7	C3	No Selection	NSRef	15	0	47
7	C3	No Selection	NSRef	16	2	0
7	C3	No Selection	NSRef	17	7	8
7	C3	No Selection	NSRef	18	0	56
7	C3	No Selection	NSRef	19	9	2
7	C3	No Selection	NSRef	20	3	4
7	NSRef_1	Selection	Control	1	NA	51
7	NSRef_1	Selection	Control	2	NA	52
7	NSRef_1	Selection	Control	3	NA	45
7	NSRef_1	Selection	Control	4	NA	27
7	NSRef_1	Selection	Control	5	NA	46
7	NSRef_1	Selection	Control	6	NA	41
7	NSRef_1	Selection	Control	7	NA	40
7	NSRef_1	Selection	Control	8	NA	32
7	NSRef_1	Selection	Control	9	NA	51
7	NSRef_1	Selection	Control	10	NA	60
7	NSRef_1	Selection	NSRef	1	12	2
7	NSRef_1	Selection	NSRef	2	1	37
7	NSRef_1	Selection	NSRef	3	7	41
7	NSRef_1	Selection	NSRef	4	7	0
7	NSRef_1	Selection	NSRef	5	11	0
7	NSRef_1	Selection	NSRef	6	5	1
7	NSRef_1	Selection	NSRef	7	11	9
7	NSRef_1	Selection	NSRef	8	18	5
7	NSRef_1	Selection	NSRef	9	9	0
7	NSRef_1	Selection	NSRef	10	3	2
7	NSRef_1	Selection	NSRef	11	31	4
7	NSRef_1	Selection	NSRef	12	10	2
7	NSRef_1	Selection	NSRef	13	19	2
7	NSRef_1	Selection	NSRef	14	8	2
7	NSRef_1	Selection	NSRef	15	3	3
7	NSRef_1	Selection	NSRef	16	7	6
7	NSRef_1	Selection	NSRef	17	5	4
7	NSRef_1	Selection	NSRef	18	10	1
7	NSRef_1	Selection	NSRef	19	31	3
7	NSRef_1	Selection	NSRef	20	20	4
7	NSRef_2	Selection	Control	1	NA	38
7	NSRef_2	Selection	Control	2	NA	58
7	NSRef_2	Selection	Control	3	NA	39
7	NSRef_2	Selection	Control	4	NA	33
7	NSRef_2	Selection	Control	5	NA	32
7	NSRef_2	Selection	Control	6	NA	50
7	NSRef_2	Selection	Control	7	NA	50
7	NSRef_2	Selection	Control	8	NA	29
7	NSRef_2	Selection	Control	9	NA	25
7	NSRef_2	Selection	Control	10	NA	39
7	NSRef_2	Selection	NSRef	1	3	2
7	NSRef_2	Selection	NSRef	2	12	2
7	NSRef_2	Selection	NSRef	3	2	34
7	NSRef_2	Selection	NSRef	4	3	1
7	NSRef_2	Selection	NSRef	5	3	1
7	NSRef_2	Selection	NSRef	6	1	3
7	NSRef_2	Selection	NSRef	7	5	4
7	NSRef_2	Selection	NSRef	8	9	3
7	NSRef_2	Selection	NSRef	9	6	5
7	NSRef_2	Selection	NSRef	10	5	7
7	NSRef_2	Selection	NSRef	11	0	2
7	NSRef_2	Selection	NSRef	12	6	0
7	NSRef_2	Selection	NSRef	13	2	8
7	NSRef_2	Selection	NSRef	14	7	8
7	NSRef_2	Selection	NSRef	15	4	2
7	NSRef_2	Selection	NSRef	16	30	0
7	NSRef_2	Selection	NSRef	17	14	1
7	NSRef_2	Selection	NSRef	18	13	16
7	NSRef_2	Selection	NSRef	19	1	7
7	NSRef_2	Selection	NSRef	20	10	0
7	NSRef_3	Selection	Control	1	NA	48
7	NSRef_3	Selection	Control	2	NA	64
7	NSRef_3	Selection	Control	3	NA	45
7	NSRef_3	Selection	Control	4	NA	53
7	NSRef_3	Selection	Control	5	NA	50
7	NSRef_3	Selection	Control	6	NA	44
7	NSRef_3	Selection	Control	7	NA	50
7	NSRef_3	Selection	Control	8	NA	66
7	NSRef_3	Selection	Control	9	NA	49
7	NSRef_3	Selection	Control	10	NA	56
7	NSRef_3	Selection	NSRef	1	2	0
7	NSRef_3	Selection	NSRef	2	1	2
7	NSRef_3	Selection	NSRef	3	2	0
7	NSRef_3	Selection	NSRef	4	7	3
7	NSRef_3	Selection	NSRef	5	8	31
7	NSRef_3	Selection	NSRef	6	2	4
7	NSRef_3	Selection	NSRef	7	9	2
7	NSRef_3	Selection	NSRef	8	7	0
7	NSRef_3	Selection	NSRef	9	8	1
7	NSRef_3	Selection	NSRef	10	0	56
7	NSRef_3	Selection	NSRef	11	26	0
7	NSRef_3	Selection	NSRef	12	3	6
7	NSRef_3	Selection	NSRef	13	8	5
7	NSRef_3	Selection	NSRef	14	12	1
7	NSRef_3	Selection	NSRef	15	8	5
7	NSRef_3	Selection	NSRef	16	14	1
7	NSRef_3	Selection	NSRef	17	4	0
7	NSRef_3	Selection	NSRef	18	3	3
7	NSRef_3	Selection	NSRef	19	4	3
7	NSRef_3	Selection	NSRef	20	2	20
8	C1	No Selection	Control	1	NA	47
8	C1	No Selection	Control	2	NA	43
8	C1	No Selection	Control	3	NA	40
8	C1	No Selection	Control	4	NA	42
8	C1	No Selection	Control	5	NA	27
8	C1	No Selection	Control	6	NA	37
8	C1	No Selection	Control	7	NA	35
8	C1	No Selection	Control	8	NA	39
8	C1	No Selection	Control	9	NA	61
8	C1	No Selection	Control	10	NA	27
8	C1	No Selection	NSRef	1	1	13
8	C1	No Selection	NSRef	2	0	9
8	C1	No Selection	NSRef	3	0	0
8	C1	No Selection	NSRef	4	1	1
8	C1	No Selection	NSRef	5	1	1
8	C1	No Selection	NSRef	6	10	8
8	C1	No Selection	NSRef	7	0	0
8	C1	No Selection	NSRef	8	0	6
8	C1	No Selection	NSRef	9	4	2
8	C1	No Selection	NSRef	10	NA	NA
8	C1	No Selection	NSRef	11	NA	NA
8	C1	No Selection	NSRef	12	NA	NA
8	C1	No Selection	NSRef	13	NA	NA
8	C1	No Selection	NSRef	14	NA	NA
8	C1	No Selection	NSRef	15	NA	NA
8	C1	No Selection	NSRef	16	NA	NA
8	C1	No Selection	NSRef	17	NA	NA
8	C1	No Selection	NSRef	18	NA	NA
8	C1	No Selection	NSRef	19	NA	NA
8	C1	No Selection	NSRef	20	NA	NA
8	C2	No Selection	Control	1	NA	15
8	C2	No Selection	Control	2	NA	39
8	C2	No Selection	Control	3	NA	38
8	C2	No Selection	Control	4	NA	27
8	C2	No Selection	Control	5	NA	50
8	C2	No Selection	Control	6	NA	37
8	C2	No Selection	Control	7	NA	43
8	C2	No Selection	Control	8	NA	35
8	C2	No Selection	Control	9	NA	25
8	C2	No Selection	Control	10	NA	23
8	C2	No Selection	NSRef	1	0	2
8	C2	No Selection	NSRef	2	3	4
8	C2	No Selection	NSRef	3	0	4
8	C2	No Selection	NSRef	4	1	5
8	C2	No Selection	NSRef	5	7	9
8	C2	No Selection	NSRef	6	1	2
8	C2	No Selection	NSRef	7	0	1
8	C2	No Selection	NSRef	8	1	0
8	C2	No Selection	NSRef	9	0	0
8	C2	No Selection	NSRef	10	4	4
8	C2	No Selection	NSRef	11	4	0
8	C2	No Selection	NSRef	12	1	3
8	C2	No Selection	NSRef	13	3	1
8	C2	No Selection	NSRef	14	NA	NA
8	C2	No Selection	NSRef	15	NA	NA
8	C2	No Selection	NSRef	16	NA	NA
8	C2	No Selection	NSRef	17	NA	NA
8	C2	No Selection	NSRef	18	NA	NA
8	C2	No Selection	NSRef	19	NA	NA
8	C2	No Selection	NSRef	20	NA	NA
8	C3	No Selection	Control	1	NA	33
8	C3	No Selection	Control	2	NA	36
8	C3	No Selection	Control	3	NA	57
8	C3	No Selection	Control	4	NA	40
8	C3	No Selection	Control	5	NA	53
8	C3	No Selection	Control	6	NA	28
8	C3	No Selection	Control	7	NA	21
8	C3	No Selection	Control	8	NA	33
8	C3	No Selection	Control	9	NA	34
8	C3	No Selection	Control	10	NA	35
8	C3	No Selection	NSRef	1	0	0
8	C3	No Selection	NSRef	2	0	3
8	C3	No Selection	NSRef	3	0	1
8	C3	No Selection	NSRef	4	0	1
8	C3	No Selection	NSRef	5	0	2
8	C3	No Selection	NSRef	6	3	2
8	C3	No Selection	NSRef	7	3	6
8	C3	No Selection	NSRef	8	2	0
8	C3	No Selection	NSRef	9	0	1
8	C3	No Selection	NSRef	10	0	7
8	C3	No Selection	NSRef	11	4	0
8	C3	No Selection	NSRef	12	1	1
8	C3	No Selection	NSRef	13	0	3
8	C3	No Selection	NSRef	14	1	1
8	C3	No Selection	NSRef	15	0	3
8	C3	No Selection	NSRef	16	3	0
8	C3	No Selection	NSRef	17	NA	NA
8	C3	No Selection	NSRef	18	NA	NA
8	C3	No Selection	NSRef	19	NA	NA
8	C3	No Selection	NSRef	20	NA	NA
8	NSRef_1	Selection	Control	1	NA	43
8	NSRef_1	Selection	Control	2	NA	29
8	NSRef_1	Selection	Control	3	NA	64
8	NSRef_1	Selection	Control	4	NA	45
8	NSRef_1	Selection	Control	5	NA	30
8	NSRef_1	Selection	Control	6	NA	15
8	NSRef_1	Selection	Control	7	NA	48
8	NSRef_1	Selection	Control	8	NA	21
8	NSRef_1	Selection	Control	9	NA	26
8	NSRef_1	Selection	Control	10	NA	45
8	NSRef_1	Selection	NSRef	1	8	4
8	NSRef_1	Selection	NSRef	2	10	0
8	NSRef_1	Selection	NSRef	3	6	4
8	NSRef_1	Selection	NSRef	4	7	5
8	NSRef_1	Selection	NSRef	5	4	1
8	NSRef_1	Selection	NSRef	6	9	0
8	NSRef_1	Selection	NSRef	7	10	0
8	NSRef_1	Selection	NSRef	8	6	1
8	NSRef_1	Selection	NSRef	9	0	25
8	NSRef_1	Selection	NSRef	10	1	44
8	NSRef_1	Selection	NSRef	11	15	0
8	NSRef_1	Selection	NSRef	12	13	1
8	NSRef_1	Selection	NSRef	13	1	1
8	NSRef_1	Selection	NSRef	14	0	35
8	NSRef_1	Selection	NSRef	15	6	32
8	NSRef_1	Selection	NSRef	16	1	0
8	NSRef_1	Selection	NSRef	17	7	0
8	NSRef_1	Selection	NSRef	18	5	2
8	NSRef_1	Selection	NSRef	19	2	0
8	NSRef_1	Selection	NSRef	20	0	25
8	NSRef_2	Selection	Control	1	NA	12
8	NSRef_2	Selection	Control	2	NA	42
8	NSRef_2	Selection	Control	3	NA	48
8	NSRef_2	Selection	Control	4	NA	34
8	NSRef_2	Selection	Control	5	NA	24
8	NSRef_2	Selection	Control	6	NA	34
8	NSRef_2	Selection	Control	7	NA	39
8	NSRef_2	Selection	Control	8	NA	41
8	NSRef_2	Selection	Control	9	NA	40
8	NSRef_2	Selection	Control	10	NA	41
8	NSRef_2	Selection	NSRef	1	2	0
8	NSRef_2	Selection	NSRef	2	8	14
8	NSRef_2	Selection	NSRef	3	18	2
8	NSRef_2	Selection	NSRef	4	2	0
8	NSRef_2	Selection	NSRef	5	6	0
8	NSRef_2	Selection	NSRef	6	10	3
8	NSRef_2	Selection	NSRef	7	18	0
8	NSRef_2	Selection	NSRef	8	8	1
8	NSRef_2	Selection	NSRef	9	0	0
8	NSRef_2	Selection	NSRef	10	0	2
8	NSRef_2	Selection	NSRef	11	1	1
8	NSRef_2	Selection	NSRef	12	16	1
8	NSRef_2	Selection	NSRef	13	12	1
8	NSRef_2	Selection	NSRef	14	0	32
8	NSRef_2	Selection	NSRef	15	0	1
8	NSRef_2	Selection	NSRef	16	10	0
8	NSRef_2	Selection	NSRef	17	0	4
8	NSRef_2	Selection	NSRef	18	NA	NA
8	NSRef_2	Selection	NSRef	19	NA	NA
8	NSRef_2	Selection	NSRef	20	NA	NA
8	NSRef_3	Selection	Control	1	NA	29
8	NSRef_3	Selection	Control	2	NA	33
8	NSRef_3	Selection	Control	3	NA	56
8	NSRef_3	Selection	Control	4	NA	57
8	NSRef_3	Selection	Control	5	NA	44
8	NSRef_3	Selection	Control	6	NA	41
8	NSRef_3	Selection	Control	7	NA	34
8	NSRef_3	Selection	Control	8	NA	30
8	NSRef_3	Selection	Control	9	NA	20
8	NSRef_3	Selection	Control	10	NA	41
8	NSRef_3	Selection	NSRef	1	8	15
8	NSRef_3	Selection	NSRef	2	3	1
8	NSRef_3	Selection	NSRef	3	4	1
8	NSRef_3	Selection	NSRef	4	11	0
8	NSRef_3	Selection	NSRef	5	9	0
8	NSRef_3	Selection	NSRef	6	10	0
8	NSRef_3	Selection	NSRef	7	5	2
8	NSRef_3	Selection	NSRef	8	9	1
8	NSRef_3	Selection	NSRef	9	8	6
8	NSRef_3	Selection	NSRef	10	3	0
8	NSRef_3	Selection	NSRef	11	2	2
8	NSRef_3	Selection	NSRef	12	16	0
8	NSRef_3	Selection	NSRef	13	5	3
8	NSRef_3	Selection	NSRef	14	2	1
8	NSRef_3	Selection	NSRef	15	14	2
8	NSRef_3	Selection	NSRef	16	12	1
8	NSRef_3	Selection	NSRef	17	8	0
8	NSRef_3	Selection	NSRef	18	5	8
8	NSRef_3	Selection	NSRef	19	7	1
8	NSRef_3	Selection	NSRef	20	3	0
9	C1	No Selection	Control	1	NA	43
9	C1	No Selection	Control	2	NA	51
9	C1	No Selection	Control	3	NA	43
9	C1	No Selection	Control	4	NA	35
9	C1	No Selection	Control	5	NA	52
9	C1	No Selection	Control	6	NA	33
9	C1	No Selection	Control	7	NA	44
9	C1	No Selection	Control	8	NA	44
9	C1	No Selection	Control	9	NA	49
9	C1	No Selection	Control	10	NA	24
9	C1	No Selection	NSRef	1	0	0
9	C1	No Selection	NSRef	2	5	11
9	C1	No Selection	NSRef	3	14	0
9	C1	No Selection	NSRef	4	3	1
9	C1	No Selection	NSRef	5	6	0
9	C1	No Selection	NSRef	6	5	7
9	C1	No Selection	NSRef	7	6	16
9	C1	No Selection	NSRef	8	7	5
9	C1	No Selection	NSRef	9	5	3
9	C1	No Selection	NSRef	10	1	1
9	C1	No Selection	NSRef	11	1	1
9	C1	No Selection	NSRef	12	5	1
9	C1	No Selection	NSRef	13	1	0
9	C1	No Selection	NSRef	14	4	9
9	C1	No Selection	NSRef	15	1	0
9	C1	No Selection	NSRef	16	11	15
9	C1	No Selection	NSRef	17	14	6
9	C1	No Selection	NSRef	18	4	4
9	C1	No Selection	NSRef	19	3	2
9	C1	No Selection	NSRef	20	NA	NA
9	C2	No Selection	Control	1	NA	45
9	C2	No Selection	Control	2	NA	70
9	C2	No Selection	Control	3	NA	51
9	C2	No Selection	Control	4	NA	54
9	C2	No Selection	Control	5	NA	55
9	C2	No Selection	Control	6	NA	49
9	C2	No Selection	Control	7	NA	41
9	C2	No Selection	Control	8	NA	35
9	C2	No Selection	Control	9	NA	59
9	C2	No Selection	Control	10	NA	37
9	C2	No Selection	NSRef	1	11	14
9	C2	No Selection	NSRef	2	13	5
9	C2	No Selection	NSRef	3	9	1
9	C2	No Selection	NSRef	4	10	4
9	C2	No Selection	NSRef	5	6	3
9	C2	No Selection	NSRef	6	3	4
9	C2	No Selection	NSRef	7	16	5
9	C2	No Selection	NSRef	8	8	4
9	C2	No Selection	NSRef	9	5	7
9	C2	No Selection	NSRef	10	6	2
9	C2	No Selection	NSRef	11	19	14
9	C2	No Selection	NSRef	12	5	0
9	C2	No Selection	NSRef	13	14	0
9	C2	No Selection	NSRef	14	10	6
9	C2	No Selection	NSRef	15	12	7
9	C2	No Selection	NSRef	16	8	2
9	C2	No Selection	NSRef	17	8	1
9	C2	No Selection	NSRef	18	20	4
9	C2	No Selection	NSRef	19	10	2
9	C2	No Selection	NSRef	20	8	4
9	C3	No Selection	Control	1	NA	47
9	C3	No Selection	Control	2	NA	41
9	C3	No Selection	Control	3	NA	51
9	C3	No Selection	Control	4	NA	40
9	C3	No Selection	Control	5	NA	54
9	C3	No Selection	Control	6	NA	38
9	C3	No Selection	Control	7	NA	48
9	C3	No Selection	Control	8	NA	49
9	C3	No Selection	Control	9	NA	36
9	C3	No Selection	Control	10	NA	31
9	C3	No Selection	NSRef	1	7	3
9	C3	No Selection	NSRef	2	1	0
9	C3	No Selection	NSRef	3	6	1
9	C3	No Selection	NSRef	4	2	1
9	C3	No Selection	NSRef	5	4	1
9	C3	No Selection	NSRef	6	0	1
9	C3	No Selection	NSRef	7	1	2
9	C3	No Selection	NSRef	8	7	2
9	C3	No Selection	NSRef	9	0	55
9	C3	No Selection	NSRef	10	0	5
9	C3	No Selection	NSRef	11	7	3
9	C3	No Selection	NSRef	12	1	0
9	C3	No Selection	NSRef	13	2	2
9	C3	No Selection	NSRef	14	11	1
9	C3	No Selection	NSRef	15	5	5
9	C3	No Selection	NSRef	16	2	0
9	C3	No Selection	NSRef	17	8	2
9	C3	No Selection	NSRef	18	5	2
9	C3	No Selection	NSRef	19	2	1
9	C3	No Selection	NSRef	20	5	3
9	NSRef_1	Selection	Control	1	NA	33
9	NSRef_1	Selection	Control	2	NA	16
9	NSRef_1	Selection	Control	3	NA	47
9	NSRef_1	Selection	Control	4	NA	41
9	NSRef_1	Selection	Control	5	NA	46
9	NSRef_1	Selection	Control	6	NA	28
9	NSRef_1	Selection	Control	7	NA	32
9	NSRef_1	Selection	Control	8	NA	32
9	NSRef_1	Selection	Control	9	NA	42
9	NSRef_1	Selection	Control	10	NA	46
9	NSRef_1	Selection	NSRef	1	16	1
9	NSRef_1	Selection	NSRef	2	28	9
9	NSRef_1	Selection	NSRef	3	12	6
9	NSRef_1	Selection	NSRef	4	21	2
9	NSRef_1	Selection	NSRef	5	23	1
9	NSRef_1	Selection	NSRef	6	17	0
9	NSRef_1	Selection	NSRef	7	12	0
9	NSRef_1	Selection	NSRef	8	11	0
9	NSRef_1	Selection	NSRef	9	9	1
9	NSRef_1	Selection	NSRef	10	15	0
9	NSRef_1	Selection	NSRef	11	7	2
9	NSRef_1	Selection	NSRef	12	28	1
9	NSRef_1	Selection	NSRef	13	22	2
9	NSRef_1	Selection	NSRef	14	16	12
9	NSRef_1	Selection	NSRef	15	23	2
9	NSRef_1	Selection	NSRef	16	8	3
9	NSRef_1	Selection	NSRef	17	6	2
9	NSRef_1	Selection	NSRef	18	20	0
9	NSRef_1	Selection	NSRef	19	9	0
9	NSRef_1	Selection	NSRef	20	18	1
9	NSRef_2	Selection	Control	1	NA	52
9	NSRef_2	Selection	Control	2	NA	40
9	NSRef_2	Selection	Control	3	NA	36
9	NSRef_2	Selection	Control	4	NA	45
9	NSRef_2	Selection	Control	5	NA	39
9	NSRef_2	Selection	Control	6	NA	30
9	NSRef_2	Selection	Control	7	NA	37
9	NSRef_2	Selection	Control	8	NA	41
9	NSRef_2	Selection	Control	9	NA	44
9	NSRef_2	Selection	Control	10	NA	29
9	NSRef_2	Selection	NSRef	1	9	7
9	NSRef_2	Selection	NSRef	2	1	0
9	NSRef_2	Selection	NSRef	3	27	2
9	NSRef_2	Selection	NSRef	4	14	2
9	NSRef_2	Selection	NSRef	5	15	1
9	NSRef_2	Selection	NSRef	6	10	2
9	NSRef_2	Selection	NSRef	7	14	0
9	NSRef_2	Selection	NSRef	8	46	1
9	NSRef_2	Selection	NSRef	9	20	0
9	NSRef_2	Selection	NSRef	10	18	1
9	NSRef_2	Selection	NSRef	11	2	0
9	NSRef_2	Selection	NSRef	12	7	1
9	NSRef_2	Selection	NSRef	13	32	2
9	NSRef_2	Selection	NSRef	14	13	3
9	NSRef_2	Selection	NSRef	15	9	11
9	NSRef_2	Selection	NSRef	16	5	3
9	NSRef_2	Selection	NSRef	17	14	1
9	NSRef_2	Selection	NSRef	18	7	2
9	NSRef_2	Selection	NSRef	19	19	4
9	NSRef_2	Selection	NSRef	20	20	0
9	NSRef_3	Selection	Control	1	NA	61
9	NSRef_3	Selection	Control	2	NA	37
9	NSRef_3	Selection	Control	3	NA	43
9	NSRef_3	Selection	Control	4	NA	30
9	NSRef_3	Selection	Control	5	NA	54
9	NSRef_3	Selection	Control	6	NA	42
9	NSRef_3	Selection	Control	7	NA	51
9	NSRef_3	Selection	Control	8	NA	41
9	NSRef_3	Selection	Control	9	NA	27
9	NSRef_3	Selection	Control	10	NA	36
9	NSRef_3	Selection	NSRef	1	28	0
9	NSRef_3	Selection	NSRef	2	25	3
9	NSRef_3	Selection	NSRef	3	10	0
9	NSRef_3	Selection	NSRef	4	17	6
9	NSRef_3	Selection	NSRef	5	12	2
9	NSRef_3	Selection	NSRef	6	0	0
9	NSRef_3	Selection	NSRef	7	12	14
9	NSRef_3	Selection	NSRef	8	13	1
9	NSRef_3	Selection	NSRef	9	8	11
9	NSRef_3	Selection	NSRef	10	3	3
9	NSRef_3	Selection	NSRef	11	34	0
9	NSRef_3	Selection	NSRef	12	1	2
9	NSRef_3	Selection	NSRef	13	9	1
9	NSRef_3	Selection	NSRef	14	31	1
9	NSRef_3	Selection	NSRef	15	5	0
9	NSRef_3	Selection	NSRef	16	1	0
9	NSRef_3	Selection	NSRef	17	12	0
9	NSRef_3	Selection	NSRef	18	21	0
9	NSRef_3	Selection	NSRef	19	5	1
9	NSRef_3	Selection	NSRef	20	31	2
10	C1	No Selection	Control	1	NA	41
10	C1	No Selection	Control	2	NA	49
10	C1	No Selection	Control	3	NA	42
10	C1	No Selection	Control	4	NA	45
10	C1	No Selection	Control	5	NA	46
10	C1	No Selection	Control	6	NA	23
10	C1	No Selection	Control	7	NA	64
10	C1	No Selection	Control	8	NA	26
10	C1	No Selection	Control	9	NA	52
10	C1	No Selection	Control	10	NA	28
10	C1	No Selection	NSRef	1	0	40
10	C1	No Selection	NSRef	2	0	46
10	C1	No Selection	NSRef	3	2	9
10	C1	No Selection	NSRef	4	1	42
10	C1	No Selection	NSRef	5	6	17
10	C1	No Selection	NSRef	6	1	39
10	C1	No Selection	NSRef	7	1	44
10	C1	No Selection	NSRef	8	0	32
10	C1	No Selection	NSRef	9	1	27
10	C1	No Selection	NSRef	10	7	15
10	C1	No Selection	NSRef	11	1	17
10	C1	No Selection	NSRef	12	1	14
10	C1	No Selection	NSRef	13	2	11
10	C1	No Selection	NSRef	14	1	42
10	C1	No Selection	NSRef	15	5	17
10	C1	No Selection	NSRef	16	1	10
10	C1	No Selection	NSRef	17	1	18
10	C1	No Selection	NSRef	18	3	13
10	C1	No Selection	NSRef	19	4	10
10	C1	No Selection	NSRef	20	0	28
10	C2	No Selection	Control	1	NA	34
10	C2	No Selection	Control	2	NA	56
10	C2	No Selection	Control	3	NA	54
10	C2	No Selection	Control	4	NA	40
10	C2	No Selection	Control	5	NA	26
10	C2	No Selection	Control	6	NA	59
10	C2	No Selection	Control	7	NA	51
10	C2	No Selection	Control	8	NA	49
10	C2	No Selection	Control	9	NA	36
10	C2	No Selection	Control	10	NA	47
10	C2	No Selection	NSRef	1	5	26
10	C2	No Selection	NSRef	2	1	6
10	C2	No Selection	NSRef	3	8	10
10	C2	No Selection	NSRef	4	4	12
10	C2	No Selection	NSRef	5	0	9
10	C2	No Selection	NSRef	6	0	29
10	C2	No Selection	NSRef	7	6	22
10	C2	No Selection	NSRef	8	10	23
10	C2	No Selection	NSRef	9	2	8
10	C2	No Selection	NSRef	10	6	26
10	C2	No Selection	NSRef	11	3	14
10	C2	No Selection	NSRef	12	9	12
10	C2	No Selection	NSRef	13	1	16
10	C2	No Selection	NSRef	14	11	21
10	C2	No Selection	NSRef	15	0	63
10	C2	No Selection	NSRef	16	2	9
10	C2	No Selection	NSRef	17	2	17
10	C2	No Selection	NSRef	18	8	4
10	C2	No Selection	NSRef	19	1	30
10	C2	No Selection	NSRef	20	0	28
10	C3	No Selection	Control	1	NA	36
10	C3	No Selection	Control	2	NA	41
10	C3	No Selection	Control	3	NA	29
10	C3	No Selection	Control	4	NA	42
10	C3	No Selection	Control	5	NA	33
10	C3	No Selection	Control	6	NA	42
10	C3	No Selection	Control	7	NA	38
10	C3	No Selection	Control	8	NA	34
10	C3	No Selection	Control	9	NA	22
10	C3	No Selection	Control	10	NA	41
10	C3	No Selection	NSRef	1	0	29
10	C3	No Selection	NSRef	2	8	22
10	C3	No Selection	NSRef	3	3	12
10	C3	No Selection	NSRef	4	0	3
10	C3	No Selection	NSRef	5	2	24
10	C3	No Selection	NSRef	6	0	35
10	C3	No Selection	NSRef	7	0	33
10	C3	No Selection	NSRef	8	5	11
10	C3	No Selection	NSRef	9	0	19
10	C3	No Selection	NSRef	10	3	27
10	C3	No Selection	NSRef	11	4	14
10	C3	No Selection	NSRef	12	5	9
10	C3	No Selection	NSRef	13	0	36
10	C3	No Selection	NSRef	14	1	7
10	C3	No Selection	NSRef	15	3	4
10	C3	No Selection	NSRef	16	1	18
10	C3	No Selection	NSRef	17	2	9
10	C3	No Selection	NSRef	18	4	6
10	C3	No Selection	NSRef	19	2	3
10	C3	No Selection	NSRef	20	1	22
10	NSRef_1	Selection	Control	1	NA	50
10	NSRef_1	Selection	Control	2	NA	50
10	NSRef_1	Selection	Control	3	NA	37
10	NSRef_1	Selection	Control	4	NA	42
10	NSRef_1	Selection	Control	5	NA	28
10	NSRef_1	Selection	Control	6	NA	40
10	NSRef_1	Selection	Control	7	NA	30
10	NSRef_1	Selection	Control	8	NA	35
10	NSRef_1	Selection	Control	9	NA	34
10	NSRef_1	Selection	Control	10	NA	52
10	NSRef_1	Selection	NSRef	1	11	8
10	NSRef_1	Selection	NSRef	2	5	6
10	NSRef_1	Selection	NSRef	3	7	34
10	NSRef_1	Selection	NSRef	4	10	3
10	NSRef_1	Selection	NSRef	5	10	11
10	NSRef_1	Selection	NSRef	6	12	26
10	NSRef_1	Selection	NSRef	7	2	34
10	NSRef_1	Selection	NSRef	8	10	4
10	NSRef_1	Selection	NSRef	9	6	22
10	NSRef_1	Selection	NSRef	10	16	3
10	NSRef_1	Selection	NSRef	11	4	29
10	NSRef_1	Selection	NSRef	12	16	10
10	NSRef_1	Selection	NSRef	13	18	23
10	NSRef_1	Selection	NSRef	14	4	20
10	NSRef_1	Selection	NSRef	15	9	33
10	NSRef_1	Selection	NSRef	16	16	2
10	NSRef_1	Selection	NSRef	17	4	1
10	NSRef_1	Selection	NSRef	18	7	36
10	NSRef_1	Selection	NSRef	19	10	5
10	NSRef_1	Selection	NSRef	20	6	12
10	NSRef_2	Selection	Control	1	NA	53
10	NSRef_2	Selection	Control	2	NA	54
10	NSRef_2	Selection	Control	3	NA	49
10	NSRef_2	Selection	Control	4	NA	47
10	NSRef_2	Selection	Control	5	NA	41
10	NSRef_2	Selection	Control	6	NA	56
10	NSRef_2	Selection	Control	7	NA	33
10	NSRef_2	Selection	Control	8	NA	52
10	NSRef_2	Selection	Control	9	NA	40
10	NSRef_2	Selection	Control	10	NA	32
10	NSRef_2	Selection	NSRef	1	14	2
10	NSRef_2	Selection	NSRef	2	8	0
10	NSRef_2	Selection	NSRef	3	9	9
10	NSRef_2	Selection	NSRef	4	6	2
10	NSRef_2	Selection	NSRef	5	6	7
10	NSRef_2	Selection	NSRef	6	7	4
10	NSRef_2	Selection	NSRef	7	0	31
10	NSRef_2	Selection	NSRef	8	18	13
10	NSRef_2	Selection	NSRef	9	6	4
10	NSRef_2	Selection	NSRef	10	15	14
10	NSRef_2	Selection	NSRef	11	0	32
10	NSRef_2	Selection	NSRef	12	7	2
10	NSRef_2	Selection	NSRef	13	11	14
10	NSRef_2	Selection	NSRef	14	13	12
10	NSRef_2	Selection	NSRef	15	10	9
10	NSRef_2	Selection	NSRef	16	5	15
10	NSRef_2	Selection	NSRef	17	21	9
10	NSRef_2	Selection	NSRef	18	5	4
10	NSRef_2	Selection	NSRef	19	6	19
10	NSRef_2	Selection	NSRef	20	0	44
10	NSRef_3	Selection	Control	1	NA	64
10	NSRef_3	Selection	Control	2	NA	37
10	NSRef_3	Selection	Control	3	NA	54
10	NSRef_3	Selection	Control	4	NA	50
10	NSRef_3	Selection	Control	5	NA	54
10	NSRef_3	Selection	Control	6	NA	48
10	NSRef_3	Selection	Control	7	NA	62
10	NSRef_3	Selection	Control	8	NA	60
10	NSRef_3	Selection	Control	9	NA	59
10	NSRef_3	Selection	Control	10	NA	57
10	NSRef_3	Selection	NSRef	1	7	4
10	NSRef_3	Selection	NSRef	2	3	22
10	NSRef_3	Selection	NSRef	3	7	12
10	NSRef_3	Selection	NSRef	4	17	9
10	NSRef_3	Selection	NSRef	5	0	60
10	NSRef_3	Selection	NSRef	6	7	0
10	NSRef_3	Selection	NSRef	7	0	42
10	NSRef_3	Selection	NSRef	8	14	7
10	NSRef_3	Selection	NSRef	9	8	4
10	NSRef_3	Selection	NSRef	10	8	14
10	NSRef_3	Selection	NSRef	11	10	0
10	NSRef_3	Selection	NSRef	12	22	2
10	NSRef_3	Selection	NSRef	13	14	7
10	NSRef_3	Selection	NSRef	14	0	65
10	NSRef_3	Selection	NSRef	15	0	45
10	NSRef_3	Selection	NSRef	16	7	3
10	NSRef_3	Selection	NSRef	17	2	21
10	NSRef_3	Selection	NSRef	18	7	5
10	NSRef_3	Selection	NSRef	19	10	9
10	NSRef_3	Selection	NSRef	20	16	20
11	C1	No Selection	Control	1	NA	33
11	C1	No Selection	Control	2	NA	32
11	C1	No Selection	Control	3	NA	32
11	C1	No Selection	Control	4	NA	44
11	C1	No Selection	Control	5	NA	41
11	C1	No Selection	Control	6	NA	35
11	C1	No Selection	Control	7	NA	71
11	C1	No Selection	Control	8	NA	34
11	C1	No Selection	Control	9	NA	44
11	C1	No Selection	Control	10	NA	56
11	C1	No Selection	NSRef	1	0	19
11	C1	No Selection	NSRef	2	3	12
11	C1	No Selection	NSRef	3	0	16
11	C1	No Selection	NSRef	4	1	13
11	C1	No Selection	NSRef	5	7	10
11	C1	No Selection	NSRef	6	0	43
11	C1	No Selection	NSRef	7	0	44
11	C1	No Selection	NSRef	8	2	6
11	C1	No Selection	NSRef	9	0	12
11	C1	No Selection	NSRef	10	3	14
11	C1	No Selection	NSRef	11	1	8
11	C1	No Selection	NSRef	12	1	23
11	C1	No Selection	NSRef	13	1	9
11	C1	No Selection	NSRef	14	0	20
11	C1	No Selection	NSRef	15	4	20
11	C1	No Selection	NSRef	16	0	12
11	C1	No Selection	NSRef	17	0	39
11	C1	No Selection	NSRef	18	2	10
11	C1	No Selection	NSRef	19	1	10
11	C1	No Selection	NSRef	20	2	17
11	C2	No Selection	Control	1	NA	36
11	C2	No Selection	Control	2	NA	27
11	C2	No Selection	Control	3	NA	40
11	C2	No Selection	Control	4	NA	31
11	C2	No Selection	Control	5	NA	31
11	C2	No Selection	Control	6	NA	39
11	C2	No Selection	Control	7	NA	22
11	C2	No Selection	Control	8	NA	44
11	C2	No Selection	Control	9	NA	36
11	C2	No Selection	Control	10	NA	47
11	C2	No Selection	NSRef	1	0	51
11	C2	No Selection	NSRef	2	0	19
11	C2	No Selection	NSRef	3	5	20
11	C2	No Selection	NSRef	4	1	15
11	C2	No Selection	NSRef	5	9	16
11	C2	No Selection	NSRef	6	2	12
11	C2	No Selection	NSRef	7	1	6
11	C2	No Selection	NSRef	8	3	5
11	C2	No Selection	NSRef	9	1	14
11	C2	No Selection	NSRef	10	3	13
11	C2	No Selection	NSRef	11	5	8
11	C2	No Selection	NSRef	12	1	10
11	C2	No Selection	NSRef	13	4	22
11	C2	No Selection	NSRef	14	5	11
11	C2	No Selection	NSRef	15	2	7
11	C2	No Selection	NSRef	16	0	3
11	C2	No Selection	NSRef	17	2	7
11	C2	No Selection	NSRef	18	0	6
11	C2	No Selection	NSRef	19	0	6
11	C2	No Selection	NSRef	20	0	53
11	C3	No Selection	Control	1	NA	34
11	C3	No Selection	Control	2	NA	41
11	C3	No Selection	Control	3	NA	39
11	C3	No Selection	Control	4	NA	49
11	C3	No Selection	Control	5	NA	35
11	C3	No Selection	Control	6	NA	32
11	C3	No Selection	Control	7	NA	41
11	C3	No Selection	Control	8	NA	38
11	C3	No Selection	Control	9	NA	31
11	C3	No Selection	Control	10	NA	37
11	C3	No Selection	NSRef	1	0	31
11	C3	No Selection	NSRef	2	4	16
11	C3	No Selection	NSRef	3	0	43
11	C3	No Selection	NSRef	4	1	17
11	C3	No Selection	NSRef	5	2	30
11	C3	No Selection	NSRef	6	2	37
11	C3	No Selection	NSRef	7	0	41
11	C3	No Selection	NSRef	8	0	38
11	C3	No Selection	NSRef	9	1	13
11	C3	No Selection	NSRef	10	0	45
11	C3	No Selection	NSRef	11	1	13
11	C3	No Selection	NSRef	12	0	24
11	C3	No Selection	NSRef	13	0	36
11	C3	No Selection	NSRef	14	0	36
11	C3	No Selection	NSRef	15	0	33
11	C3	No Selection	NSRef	16	0	28
11	C3	No Selection	NSRef	17	1	17
11	C3	No Selection	NSRef	18	4	8
11	C3	No Selection	NSRef	19	0	9
11	C3	No Selection	NSRef	20	0	16
11	NSRef_1	Selection	Control	1	NA	41
11	NSRef_1	Selection	Control	2	NA	44
11	NSRef_1	Selection	Control	3	NA	46
11	NSRef_1	Selection	Control	4	NA	52
11	NSRef_1	Selection	Control	5	NA	46
11	NSRef_1	Selection	Control	6	NA	39
11	NSRef_1	Selection	Control	7	NA	55
11	NSRef_1	Selection	Control	8	NA	38
11	NSRef_1	Selection	Control	9	NA	59
11	NSRef_1	Selection	Control	10	NA	36
11	NSRef_1	Selection	NSRef	1	10	8
11	NSRef_1	Selection	NSRef	2	15	6
11	NSRef_1	Selection	NSRef	3	18	8
11	NSRef_1	Selection	NSRef	4	11	9
11	NSRef_1	Selection	NSRef	5	2	2
11	NSRef_1	Selection	NSRef	6	10	8
11	NSRef_1	Selection	NSRef	7	9	12
11	NSRef_1	Selection	NSRef	8	6	4
[truncated: 1,782 more rows]

## Sheet: Figure 1A - R Script
###To run script: Delete first two rows of raw data, save it as .csv format and run script on R
###Line refers to population
### Read data
setwd(dirname(rstudioapi::getActiveDocumentContext()$path))
list.files()
data = read.table('Figure 1A - Raw Data.csv', sep=',',dec='.', head=T)
head(data)
tail(data)
str(data)
#### Subset data into no infection and infection treatments (Treatment)
data_control = data[data$Treatment=='Control',]
data_treatment = data[!data$Treatment=='Control',]
#### Create summary tables with mean capsules/Flies per line
library(plyr)
data_control_summary = ddply(data_control,.(Generation,Line, Selection_Regime),summarise,
mean_Total_Flies_Control_Vials = mean(Flies,na.rm=T))
data_control_summary_2 = ddply(data_control_summary,.(Generation, Selection_Regime),summarise,
mean_Total_Flies_Control_Vials = mean(mean_Total_Flies_Control_Vials,na.rm=T))
data_treatment_summary = ddply(data_treatment,.(Generation,Line, Selection_Regime,Treatment),summarise,
mean_Total_Flies = mean(Flies,na.rm=T),
mean_Total_Capsules = mean(Capsules, na.rm=T))
data_treatment_summary_2 = ddply(data_treatment_summary,.(Generation, Selection_Regime,Treatment),summarise,
mean_Total_Flies = mean(mean_Total_Flies,na.rm=T),
mean_Total_Capsules = mean(mean_Total_Capsules, na.rm=T))
data_summary = merge(data_treatment_summary,data_control_summary,
by=c('Generation', 'Line', 'Selection_Regime'))
##Calculate encapsulation and infection proportions
data_summary$Encapsulation_Proportion = data_summary$mean_Total_Capsules/(data_summary$mean_Total_Flies_Control_Vials-data_summary$mean_Total_Flies)
data_summary$Infection_Proportion = 1- data_summary$mean_Total_Flies/(data_summary$mean_Total_Flies_Control_Vials)
##Calculate averages of encapsulation per selection regime
data_summary_2 = ddply(data_summary,.(Generation, Selection_Regime, Treatment),summarise,
mean_Encapsulation_Proportion = mean(Encapsulation_Proportion,na.rm=T),
mean_Infection_Proportion = mean(Infection_Proportion,na.rm=T))
####Plot data
library(ggplot2)
#Create ID variable with treatment and selection regimes
data_summary$ID=paste(data_summary$Line,data_summary$Treatment)
data_summary_2$ID=paste(data_summary_2$Selection_Regime,data_summary_2$Treatment)
#Create vector with generation where encapsulation was measured
generation_labels = c("0","1","2","3","4","5","6","7","8","9","10","11"," ","13","14","15","16"," ","18"," ","20"," ","22"," "," ","25"," "," ","28"," "," "," "," ","33")
color_vector = c('#0072b2', '#d55e00','#0072b2')
p_narrow = ggplot(data_summary, aes(x=Generation, y=Encapsulation_Proportion, color= Selection_Regime,
shape=Selection_Regime))+
geom_point(size=2.5)+
geom_line(aes(group=ID), size=0.5)+
scale_linetype_manual(name='Selection regime',values=c(2,1,1,2))+
scale_color_manual(name='Selection regime', values=color_vector)+
scale_shape_manual(name='Selection regime',values=c(16,16,0))+
geom_point(data=data_summary, aes(x=Generation, y=Encapsulation_Proportion), alpha=0.7)+
scale_y_continuous(limits = c(0, 1),expand = c(0, 0),breaks=seq(0,1,.1))+
scale_x_continuous(breaks=seq(0,max(data$Generation)),labels=generation_labels)+
theme_bw()+
xlab(NULL)+
xlab(expression("Generation"))+
ylab(expression('Proportion of infected flies with capsules'))+
theme(panel.grid = element_blank(),
legend.title=element_text(size=14),
legend.text=element_text(size=12),
axis.text.x = element_text(angle = 90, color='grey0', size=10, vjust = .5, hjust=1),
axis.text.y = element_text(angle = 0, color='grey0', size=12),
axis.title.y = element_text(colour = "grey0", size=14),
axis.title.x = element_text(colour = "grey0", size=14, vjust = -1.5),
panel.border = element_blank(),
axis.line = element_line(colour = "grey30"),
# legend.position = c(0.25, 0.88), #Alternative legend
legend.position = "none")+
annotate("text", x = 1.1, y = 0.95, label = "Selection Regime", size=5, hjust=0)+
annotate("text", x = 2.1, y = 0.85, label = "No Parasitism", color='#0072b2', size=5, hjust=0)+
annotate("text", x = 2.1, y = 0.78, label = "High Parasitism", color='#d55e00', size=5, hjust=0)
p_narrow
pdf(file="Artificial_Selection_All_Generations_Lines_Narrow.pdf",height=4,width=4.5)
p_narrow
dev.off()
########################Statistical analysis##################################################
data_stat = data_summary[data_summary$Line!='Source',] #Remove generation before selection started
head(data_stat)
#Transform encapsulation proportions with arcsin transformation
asinTransform <- function(p) { asin(sqrt(p)) }
data_stat$Encapsulation_Proportion_Transformed = asinTransform(data_stat$Encapsulation_Proportion) #Transform proportion with arcsin
#Check transformation
p_transformation = ggplot(data_stat, aes(x=Encapsulation_Proportion, y=Encapsulation_Proportion_Transformed))+
geom_point(aes(color=Selection_Regime))+
scale_color_manual(name='Selection regime', values=c('#8c8c8c','#5396d4'))
p_transformation
library(lme4)
library(car)
m1 = lmer(Encapsulation_Proportion_Transformed ~ Selection_Regime * Generation + (1|Line), data=data_stat)
summary(m1)
Anova(m1)

## Sheet: Figure 1B - Raw Data
Figure 1B - Number of larvae with melanized oil droplets 48 hours post injection in each line
Generation	Line	Selection_Regime	Melanized	Non_Melanized	Total
34	C1	No Selection	1	30	31
34	C2	No Selection	4	36	40
34	C3	No Selection	0	38	38
34	NSRef-1	Selection	23	15	38
34	NSRef-2	Selection	16	19	35
34	NSRef-3	Selection	12	22	34
49	C1	No Selection	0	15	15
49	C2	No Selection	1	25	26
49	C3	No Selection	3	31	34
49	NSRef-1	Selection	18	17	35
49	NSRef-2	Selection	13	15	28
49	NSRef-3	Selection	16	14	30

## Sheet: Figure 1B - R Script
###To run script: Delete first two rows of raw data, save it as .csv format and run script on R
#load required packages
library(ggplot2)
library(plyr)
library(multcomp)
library(Hmisc)
library(reshape2)
#Set up
setwd(dirname(rstudioapi::getActiveDocumentContext()$path))
list.files()
data = read.table('Figure 1B - Raw Data.csv', sep=',',dec='.', head=T)
head(data)
str(data)
data$Generation = as.factor(data$Generation)
#Crete data summaries with proportions of melanized oil droplets
data_summary=ddply(data,.(Generation, Line, Selection_Regime),summarise,
Proportion_Melanized = binconf(x=Melanized, n=Total, alpha=0.05, method='wilson')[1],
Lower_Confidence_Interval_Value = binconf(x=Melanized, n=Total, alpha=0.05, method='wilson')[2],
Upper_Confidence_Interval_Value = binconf(x=Melanized, n=Total, alpha=0.05, method='wilson')[3],
Total = sum(Total))
data_summary_2=ddply(data_summary,.(Generation, Selection_Regime),summarise,
mean_Proportion_Melanized = mean(Proportion_Melanized))
##Plot
color_vector = c("#0072b2", "#d55e00")
p_narrow = ggplot(data_summary_2, aes(x=Generation, y=mean_Proportion_Melanized))+
geom_bar(stat='identity', position = position_dodge(width = 0.9), alpha=1, aes(fill=Selection_Regime))+
geom_point(data= data_summary, position = position_dodge(width = 0.9), aes(y=Proportion_Melanized,group=Selection_Regime))+
scale_fill_manual(name='Selection regime', values = color_vector)+
ylab(expression('Proportion larvae melanising oil droplets'))+
xlab(expression('Generation'))+
scale_y_continuous(limits = c(0, 1), expand = c(0, 0),breaks=seq(0,1,.1))+
theme_bw()+
theme(panel.grid = element_blank(),
axis.title.x = element_text(colour = "grey0", face='bold',size=14, vjust=-1),
axis.text.x = element_text(angle = 0, color='grey0',size=12),
axis.title.y = element_text(colour = "grey0", face='bold',size=14),
axis.text.y = element_text(colour = "grey0",size=12),
panel.border = element_blank(),
axis.line = element_line(colour = "grey30"),
legend.position = "none")
p_narrow
pdf(file="Oil_Melanization.pdf",height=4,width=3)
p_narrow
dev.off()
########################Statistical analysis##################################################
library(car)
library(lme4)
asinTransform <- function(p) { asin(sqrt(p)) }
data_summary$Proportion_Melanized_Transformed = asinTransform(data_summary$Proportion_Melanized) #Transform proportion with arcsin
m1 = lmer(Proportion_Melanized_Transformed~Selection_Regime + Generation + (1|Line), data=data_summary)
summary(m1)
