# Supplementary material for: Constitutive activation of cellular immunity underlies the evolution of resistance to infection in Drosophila
Source: eLife. 2020 Dec 24;9:e59095. doi: 10.7554/eLife.59095 (PMC7785293; doi:10.7554/eLife.59095)
Supplement: Figure 2—figure supplement 1—source data 1. [file elife-59095-fig2-figsupp1-data1.xlsx]

## Sheet: Supllemental Fig 1 - Raw Data
Figure 2 - figure supplement 1 - Ct values for atilla, PPO and the control gene RpL32
Generation	Line	Selection_Regime	Treatment	Rpl	atilla	PPO3
Generation 34	C1	No Parasitism	No Infection	22.848	25.204	27.844
Generation 34	C1	No Parasitism	No Infection	22.3934	25.2756	26.6047
Generation 34	C1	No Parasitism	Infection	21.4013	21.1393	22.0049
Generation 34	C1	No Parasitism	Infection	21.2459	21.524	22.3226
Generation 34	C2	No Parasitism	No Infection	23.4671	26.8101	29.2937
Generation 34	C2	No Parasitism	No Infection	22.7406	26.7416	28.6688
Generation 34	C2	No Parasitism	Infection	19.0975	20.6026	22.135
Generation 34	C2	No Parasitism	Infection	20.8712	21.9709	23.5827
Generation 34	C3	No Parasitism	No Infection	21.9185	28.1949	29.5141
Generation 34	C3	No Parasitism	No Infection	22.4531	27.1791	28.8281
Generation 34	C3	No Parasitism	Infection	26.5566	27.4267	27.8294
Generation 34	C3	No Parasitism	Infection	20.9223	21.6716	21.728
Generation 34	NSRef-1	High Parasitism	No Infection	20.4009	21.58	20.7958
Generation 34	NSRef-1	High Parasitism	No Infection	20.8746	23.1199	22.706
Generation 34	NSRef-1	High Parasitism	Infection	20.0096	21.4502	21.1184
Generation 34	NSRef-1	High Parasitism	Infection	19.7278	20.9438	20.6207
Generation 34	NSRef-2	High Parasitism	No Infection	21.071	22.7429	21.9922
Generation 34	NSRef-2	High Parasitism	No Infection	21.36	24.1066	24.3321
Generation 34	NSRef-2	High Parasitism	Infection	19.9518	20.9986	20.8112
Generation 34	NSRef-2	High Parasitism	Infection	19.4129	20.485	20.5219
Generation 34	NSRef-3	High Parasitism	No Infection	20.8266	22.4428	23.1147
Generation 34	NSRef-3	High Parasitism	No Infection	21.4311	22.6599	23.2579
Generation 34	NSRef-3	High Parasitism	Infection	19.9063	21.0026	20.8134
Generation 34	NSRef-3	High Parasitism	Infection	19.6861	20.7092	20.7097
Generation 49	C1	No Parasitism	No Infection	23.2007	27.7029	26.1146
Generation 49	C1	No Parasitism	No Infection	28.9106	34.4766	31.5131
Generation 49	C1	No Parasitism	Infection	21.9043	22.93	22.1502
Generation 49	C1	No Parasitism	Infection	21.3222	22.7544	21.818
Generation 49	C2	No Parasitism	No Infection	24.127	30.1538	28.7897
Generation 49	C2	No Parasitism	No Infection	23.3783	26.6164	26.2081
Generation 49	C2	No Parasitism	Infection	21.9942	24.3353	23.1512
Generation 49	C2	No Parasitism	Infection	21.8711	23.8686	22.6435
Generation 49	C3	No Parasitism	No Infection	23.3487	28.3296	28.0589
Generation 49	C3	No Parasitism	No Infection	23.2737	26.832	27.4772
Generation 49	C3	No Parasitism	Infection	21.8527	23.1926	23.1552
Generation 49	C3	No Parasitism	Infection	22.6791	23.696	23.7315
Generation 49	NSRef-1	High Parasitism	No Infection	22.3659	23.8889	24.0873
Generation 49	NSRef-1	High Parasitism	No Infection	22.3368	23.8347	23.8516
Generation 49	NSRef-1	High Parasitism	Infection	20.5059	21.393	22.3301
Generation 49	NSRef-1	High Parasitism	Infection	21.3266	21.5893	22.191
Generation 49	NSRef-2	High Parasitism	No Infection	20.1079	23.7624	23.4129
Generation 49	NSRef-2	High Parasitism	No Infection	21.2465	22.877	22.7209
Generation 49	NSRef-2	High Parasitism	Infection	21.5202	22.3136	22.7394
Generation 49	NSRef-2	High Parasitism	Infection	21.142	21.3532	22.0778
Generation 49	NSRef-3	High Parasitism	No Infection	21.7327	24.2805	24.2892
Generation 49	NSRef-3	High Parasitism	No Infection	22.9156	23.4878	24.639
Generation 49	NSRef-3	High Parasitism	Infection	20.5122	21.5806	21.9137
Generation 49	NSRef-3	High Parasitism	Infection	20.7957	21.2268	22.0704

## Sheet: Supllemental Fig 1 - R script
###To run script: Delete first two rows of raw data, save it as .csv format and run script on R
#load required packages
library(ggplot2)
library(plyr)
library(multcomp)
library(Hmisc)
library(reshape2)
library(stringr)
#load dataset
setwd(dirname(rstudioapi::getActiveDocumentContext()$path))
list.files()
data = read.table('Supllemental Fig 1 - Raw Data.csv', sep=',',dec='.', head=T, check.names = F)
head(data)
data$Treatment = factor(data$Treatment, levels = c('No Infection', 'Infection'))
data$Selection_Regime = factor(data$Selection_Regime, levels = c('No Parasitism', 'High Parasitism'))
#Calculate DeltaCt
data$atilla = data$atilla - data$Rpl
data$PPO3 = data$PPO3 - data$Rpl
#Transform data set from wide to long form
mdata = melt(data[,c('Generation', 'Line','Selection_Regime','Treatment','atilla','PPO3')],
id.vars = c('Generation','Line', 'Selection_Regime', 'Treatment'))
colnames(mdata)=c('Generation','Line', 'Selection_Regime', 'Treatment', 'Target', 'Ct')
#Create data summaries with averages of Ct values
mdata_summary = ddply(mdata, .(Generation, Line, Selection_Regime, Treatment, Target), summarise,
mean_Ct = mean(Ct))
mdata_summary_2 = ddply(mdata_summary, .(Generation, Selection_Regime, Treatment, Target), summarise,
mean_Ct = mean(mean_Ct))
#Plot
mdata_summary$ID = paste(mdata_summary$Selection_Regime, mdata_summary$Treatment)
mdata_summary$ID = factor(mdata_summary$ID,
levels = c("No Parasitism No Infection", "No Parasitism Infection", "High Parasitism No Infection", "High Parasitism Infection"))
mdata_summary_2$ID = paste(mdata_summary_2$Selection_Regime, mdata_summary_2$Treatment)
mdata_summary_2$ID = factor(mdata_summary_2$ID,
levels = c("No Parasitism No Infection", "No Parasitism Infection", "High Parasitism No Infection", "High Parasitism Infection"))
color_vector = c("#0072b2","#d55e00")
p_negativeDeltaCt = ggplot(mdata_summary_2, aes(x=Target, y=-mean_Ct))+
geom_point(aes(alpha=Treatment, color=Selection_Regime, group=ID), position=position_dodge(width=.95), size=10, shape='-')+
geom_point(data=mdata_summary, aes(group=ID,alpha=Treatment, color=Selection_Regime), position=position_dodge(width=.95))+
geom_vline(xintercept = 1.5)+
scale_fill_manual(name='Selection regime', values = color_vector)+
scale_color_manual(name='Selection regime', values = color_vector)+
scale_alpha_manual(values = c(.5, 1))+
scale_linetype_manual(values=c(1,1))+
scale_size_manual(values=c(.75,1.5))+
guides(color = guide_legend(override.aes = list(fill = NA)),
fill = guide_legend(override.aes = list(color = NA)))+
theme_bw()+
xlab(expression('Gene'))+
ylab(expression(paste('log'[2], '(Relative expression)')))+
scale_y_continuous(expand = c(0, 0), limits = c(-max(mdata_summary$mean_Ct+.1),
-min(mdata_summary$mean_Ct-.1)))+
theme(panel.grid = element_blank(),
legend.title=element_text(size=14),
legend.text=element_text(size=12),
axis.title.x = element_text(colour = "grey30", face='bold',size=15),
axis.text.x = element_text(angle = 0, color='grey30',size=15,face = "italic"),
axis.title.y = element_text(colour = "grey30", face='bold',size=15),
axis.text.y = element_text(size=15),
axis.line = element_line(colour = "grey30"),
strip.text.x = element_text(size=12, angle=0, face = "bold"),
legend.position = 'none')+
facet_grid(.~Generation)
p_negativeDeltaCt
pdf(file="qPCR_atilla_PPO3_negativeDeltaCt.pdf",height=5,width=6)
p_negativeDeltaCt
dev.off()
########################Statistical analysis##################################################
library(lme4)
library(car)
m1 = lmer(mean_Ct ~ Treatment * Selection_Regime + (1|Line) + (1|Generation), data=mdata_summary,
subset= Target=='PPO3')
summary(m1)
Anova(m1)
m2 = lmer(mean_Ct ~ Treatment * Selection_Regime + (1|Line) + (1|Generation), data=mdata_summary,
subset= Target=='atilla')
summary(m2)
Anova(m2)
