# Supplementary material for: Constitutive activation of cellular immunity underlies the evolution of resistance to infection in Drosophila
Source: eLife. 2020 Dec 24;9:e59095. doi: 10.7554/eLife.59095 (PMC7785293; doi:10.7554/eLife.59095)
Supplement: Figure 2—source data 1. [file elife-59095-fig2-data1.csv]

Gene	Induced expression in populations evolved without parasitism (log2 fold change)	Constitutive Expression (log2 FC), (Evolved with High Parasitism)	Induced Expression (log2 FC), (Evolved with High Parasitism)	Constitutive + Induced Expression (log2 FC), (Evolved with High Parasitism)
FBgn0040510	-0.002378184	-0.001356119	-0.001565866	-0.000436377
FBgn0033238	0.000571377	0.001366477	-0.002145367	-0.000463006
FBgn0069056	0.175037477	0.045379529	0.040675876	0.078595959
FBgn0040850	0.233759773	0.068467525	0.158785234	0.206026734
FBgn0031470	0.405451153	0.187493469	0.223933999	0.3964275
FBgn0035539	0.475617995	0.241345135	0.163850022	0.420956848
FBgn0035452	0.480335323	0.269518973	0.149783948	0.446301704
FBgn0038088	0.722579121	0.293826798	0.460314617	0.734231745
FBgn0052412	0.748489502	0.403113311	0.306403246	0.729046582
FBgn0004397	0.867524305	0.438317797	0.362969931	0.793878197
FBgn0033033	0.870099293	0.349470013	0.452101308	0.797601349
FBgn0261561	0.952023827	0.460893392	0.456425446	0.902085737
FBgn0263380	1.057580555	0.585039129	0.336591483	1.032179789
FBgn0265375	1.128415806	0.690510716	0.320168799	0.99782908
FBgn0050035	1.242211093	0.736525539	0.297693908	1.104000416
FBgn0034005	1.245349862	0.669359512	0.423237499	1.087220502
FBgn0038682	1.286587305	0.681101672	0.474348741	1.19684174
FBgn0015872	1.34166759	0.665804781	0.390126424	1.070543259
FBgn0037477	1.351652642	0.693364744	0.446058691	1.130176336
FBgn0038890	0.762320489	0.46029628	0.352023206	0.820790941
FBgn0032140	0.945556461	0.538719198	0.39908187	0.926999829
FBgn0030290	2.43E-06	0.000742461	-0.002219282	-0.000348224
FBgn0038018	-0.000926694	0.000499629	-0.001600899	-0.001806095
FBgn0085282	0.150772461	0.034240671	0.133245337	0.160290318
FBgn0259228	0.850257455	0.476775763	0.328735724	0.816726409
FBgn0039108	0.654191619	0.386516704	0.248621848	0.668002252
FBgn0053329	0.354831911	0.135636584	0.241103711	0.392914414
FBgn0024238	0.957895708	0.51697806	0.330213101	0.871072707
FBgn0003748	1.129545611	0.697016428	0.269191373	1.008102067
FBgn0026374	0.740489284	0.376681835	0.320493735	0.684706739
FBgn0010387	0.901025197	0.311673661	0.372853199	0.710037677
FBgn0028956	0.09635243	0.038289591	0.01329356	0.102768047
FBgn0034880	0.268342406	0.205717181	0.050292044	0.21325759
FBgn0036359	0.123449304	0.040032353	0.043643799	0.07320102
FBgn0264895	1.097075935	0.590140989	0.38341459	0.964554118
FBgn0260442	0.946734461	0.530011759	0.346211575	0.884864466
FBgn0053225	1.215444159	0.683606449	0.452166587	1.175201936
FBgn0031080	0.70318984	0.291242329	0.357526444	0.675813729
FBgn0040551	0.740531329	0.311920935	0.42685762	0.713295827
FBgn0030396	1.444691305	0.770777918	0.498763381	1.287050405
FBgn0085211	0.002859678	-0.000392085	0.002205229	0.000116079
FBgn0033448	1.139066925	0.656027196	0.446460876	1.10643871
FBgn0034720	0.482271183	0.135131512	0.318459877	0.443897617
FBgn0022709	0.790617158	0.324582073	0.350731656	0.680734198
FBgn0035708	1.108143437	0.507297415	0.381886066	0.897104526
FBgn0034219	1.083281179	0.568921319	0.418319602	1.001778859
FBgn0034894	0.788585351	0.342354434	0.342531814	0.748919795
FBgn0003218	1.053503343	0.549997448	0.473864684	1.020195909
FBgn0038679	0.646456417	0.234517612	0.335683541	0.570566973
FBgn0030048	0.377082023	0.206727412	0.20304517	0.392626256
FBgn0032191	0.638816836	0.325645882	0.348381202	0.711693196
FBgn0261261	0.731850248	0.34738444	0.289747721	0.670659105
FBgn0003888	1.280798358	0.787984799	0.366954721	1.156859344
FBgn0028844	-0.003076408	0.003378944	-0.004448075	-0.004601548
FBgn0035498	1.024715633	0.538681584	0.365131644	0.949522958
FBgn0260660	0.120475263	0.052096056	0.044097942	0.095891133
FBgn0001987	0.736351384	0.30303591	0.302121649	0.616955229
FBgn0038311	-0.000397391	-0.001973394	-0.000430853	-0.000753873
FBgn0000256	0.927016534	0.475130468	0.297457042	0.820331349
FBgn0085259	-0.014696274	-0.002901802	-0.009926458	-0.016373762
FBgn0041710	0.974119725	0.5406334	0.326537874	0.91600362
FBgn0040299	0.640114983	0.331266269	0.243161702	0.583499303
FBgn0036663	0.59851688	0.323694722	0.256226547	0.556760877
FBgn0040089	-0.017227042	-0.014941276	-0.009450924	-0.019415881
FBgn0020249	0.670587639	0.397027812	0.220031713	0.655390697
FBgn0004387	0.501483085	0.266463034	0.155810784	0.434683208
FBgn0028427	0.776562756	0.397820656	0.267387838	0.659468175
FBgn0265613	-0.004263401	-0.001643225	-0.004686928	-0.004099353
FBgn0015589	0.772837269	0.294024787	0.327110737	0.648407423
FBgn0012051	0.699407328	0.347107712	0.307136395	0.656021565
FBgn0032422	1.197930993	0.702954944	0.378743184	1.107018921
FBgn0013272	0.467662418	0.177535661	0.267234753	0.434786634
FBgn0085359	0.938135513	0.37841101	0.445948411	0.861389252
FBgn0041182	0.553901461	0.247500083	0.303270873	0.554000838
FBgn0004657	0.954860873	0.53576893	0.356747253	0.905053832
FBgn0014011	0.844103591	0.425890469	0.304487211	0.736945553
FBgn0033309	0.512370714	0.217931524	0.278694536	0.536294519
FBgn0010395	0.645600492	0.314291182	0.253692606	0.592432603
FBgn0015765	0.816301584	0.40244906	0.312371342	0.751626406
FBgn0038206	0.946252275	0.495315729	0.351482383	0.84876237
FBgn0010397	0.844593087	0.410873588	0.357923017	0.797538072
FBgn0028893	-0.004341763	0.00024465	-0.002437407	-0.000910978
FBgn0033042	-0.002737419	0.002519113	-0.004024544	-0.001686515
FBgn0265991	0.700367373	0.316517346	0.262931249	0.585463761
FBgn0259977	0.601778799	0.307770734	0.242941063	0.587032022
FBgn0029131	0.664474452	0.299823743	0.340344078	0.630937932
FBgn0033483	0.165216581	0.053943897	0.107384373	0.146717989
FBgn0040296	0.689899795	0.256913476	0.390730031	0.690033549
FBgn0033504	1.086637367	0.536826569	0.433170718	1.006057361
FBgn0035432	0.610294772	0.31750226	0.254788514	0.555107219
FBgn0039056	0.528061203	0.247529569	0.183970875	0.430318444
FBgn0033065	-0.061379552	-0.059004829	-0.013344507	-0.075746261
FBgn0262699	0.580192022	0.271999594	0.33530426	0.647326959
FBgn0030624	-0.00066133	0.001598683	0.000490323	0.000409912
FBgn0266719	0.586669107	0.265874186	0.231197179	0.501225671
FBgn0031722	0.006140559	0.00955962	-0.006839248	0.001615112
FBgn0041087	1.225172455	0.761709052	0.358305489	1.118974516
FBgn0053056	0.783531491	0.372940551	0.312798468	0.699995603
FBgn0013733	1.175605033	0.636632564	0.413413247	1.08549168
FBgn0038915	-0.002349243	0.002398194	-0.006494262	-0.004862501
FBgn0032897	0.864422635	0.29129341	0.608131778	0.928128475
FBgn0040967	-0.003599684	-0.002303205	-0.001636851	-0.007436218
FBgn0037902	-0.011877948	-0.003448574	-0.008935116	-0.027465726
FBgn0085421	0.347018229	0.190390348	0.095873647	0.290978941
FBgn0000723	0.770842998	0.409005005	0.277301842	0.682440438
FBgn0259221	0.616281117	0.305018488	0.279093624	0.609305109
FBgn0033446	1.0572401	0.595778873	0.294729869	0.924208805
FBgn0031082	-0.003465171	0.00173741	-0.006286728	-0.003154855
FBgn0029095	0.688870047	0.316484521	0.299961186	0.610021448
FBgn0040212	0.334486725	0.198066679	0.149883073	0.348892172
FBgn0053198	0.103616114	0.05485843	0.061805359	0.100988669
FBgn0262984	-0.001627333	-0.001603141	-0.001084628	-0.002485505
FBgn0050115	0.588343804	0.298863663	0.279993587	0.581689679
FBgn0033756	0.713008024	0.344103496	0.300979259	0.651427971
FBgn0024150	0.788974723	0.401019907	0.250973074	0.665411952
FBgn0032886	1.01952681	0.460202632	0.377863215	0.897488591
FBgn0003886	1.02803973	0.559082423	0.313629667	0.879364088
FBgn0028984	0.655874115	0.335950292	0.326152625	0.663398444
FBgn0263118	0.574394493	0.306830829	0.29511673	0.59406459
FBgn0026189	0.8069533	0.396063363	0.333402683	0.711472547
FBgn0053868	0.007654666	-0.003150108	0.000931277	-0.012753892
FBgn0038243	0.385348109	0.138633444	0.17746422	0.360227297
FBgn0037296	-0.003345816	0.003589452	-0.010508326	-0.011231127
FBgn0041585	0.499052191	0.311238746	0.174756013	0.442509999
FBgn0032731	0.677732513	0.306463194	0.30245538	0.667891149
FBgn0029903	0.950034524	0.400621516	0.387361869	0.787459268
FBgn0037844	-0.007483447	0.003056796	-0.011227049	-0.00376582
FBgn0037623	0.195010909	0.115243744	0.101853939	0.220144867
FBgn0262565	0.181074332	-0.021837825	0.01527507	0.00597599
FBgn0031213	0.773694631	0.321181299	0.327642011	0.636842967
FBgn0033649	0.37372078	0.226520059	0.220044241	0.458661705
FBgn0037750	0.441507585	0.188594458	0.168331024	0.34668295
FBgn0027066	0.785303332	0.370989984	0.336059604	0.735818194
FBgn0016059	0.513639264	0.191284774	0.223703449	0.380778394
FBgn0283741	0.449472684	0.223053387	0.18520561	0.389456779
FBgn0041096	-0.004544861	0.016574561	-0.016593431	-0.001346078
FBgn0016672	0.727761616	0.289936047	0.285058131	0.609595006
FBgn0037720	0.748699425	0.427978992	0.327659527	0.753030148
FBgn0037742	-0.007386819	-0.001077925	0.004705665	0.00961125
FBgn0032010	0.41524313	0.12364382	0.269564496	0.38115519
FBgn0039101	0.159810247	0.083664936	0.121614412	0.189605387
FBgn0051216	0.042568021	0.012162094	0.044952337	0.037379499
FBgn0261363	1.466672903	0.846611205	0.320864286	1.190591886
FBgn0259481	0.780147564	0.410672658	0.298102864	0.691531915
FBgn0263077	0.662724947	0.278330641	0.275566907	0.544171689
FBgn0030040	1.214718439	0.673778145	0.412990841	1.094458735
FBgn0030748	0.164723159	0.077449313	0.082587289	0.160941933
FBgn0263400	0.07237587	0.021806922	0.019330199	0.04653362
FBgn0000253	0.691344913	0.401927956	0.224990131	0.616762939
FBgn0033141	-0.006685895	-0.004641024	-0.005065443	-0.010282823
FBgn0036742	1.002358048	0.474860466	0.419363172	0.91185792
FBgn0035879	0.537337356	0.281656754	0.212208245	0.493027949
FBgn0051729	1.014062575	0.491520666	0.390969147	0.866598165
FBgn0027657	0.750434007	0.331877423	0.32068453	0.66601406
FBgn0002838	-0.00232433	0.000104789	-0.001209285	-0.00258326
FBgn0044871	0.26550614	0.146895604	0.096399643	0.240746598
FBgn0263220	-0.001123792	0.00100096	0.00499836	0.000854623
FBgn0266758	0.626729477	0.307040686	0.267696306	0.623785162
FBgn0034691	0.359597146	0.158110629	0.123265899	0.256723633
FBgn0032857	0.667111811	0.274494014	0.288510279	0.542304639
FBgn0004456	0.951048894	0.519664511	0.412905876	0.894857324
FBgn0261565	0.551860369	0.235330628	0.270556062	0.53388349
FBgn0026602	0.874208723	0.36322205	0.420743592	0.776362905
FBgn0014141	0.855018233	0.413754716	0.331680121	0.784894066
FBgn0027509	0.324407331	0.135673624	0.195437223	0.363981696
FBgn0020304	0.571620601	0.271143891	0.2369232	0.487644153
FBgn0000042	0.653555193	0.379402334	0.188791574	0.590226707
FBgn0028394	0.093694982	0.033953457	0.004122407	0.042964633
FBgn0028931	-0.000756653	0.010015312	-0.005623065	-0.003050045
FBgn0031090	0.708818926	0.378323356	0.2683371	0.6111884
FBgn0262030	-0.000252142	0.004975724	-0.006110751	0.001593006
FBgn0031457	0.616439038	0.245849818	0.260468525	0.579029236
FBgn0032036	0.560565152	0.29540039	0.237748742	0.489391922
FBgn0052528	0.532363883	0.269135048	0.207879539	0.481974393
FBgn0261260	0.749221618	0.308334323	0.383286507	0.694474525
FBgn0010388	0.140428439	-0.021616858	0.31515823	0.290883366
FBgn0030780	-0.004956248	0.001922365	-0.009780438	-0.010054402
FBgn0086347	0.862491134	0.479314404	0.360113418	0.848192905
FBgn0085390	0.323299376	0.199221218	0.119036493	0.352962565
FBgn0044047	0.145117518	0.081795511	0.100175379	0.192368781
FBgn0003388	0.001367295	0.000434344	0.002121935	-0.000807729
FBgn0035715	0.359211448	0.180972731	0.111540589	0.297461004
FBgn0053494	0.620957572	0.282349322	0.332173704	0.625299005
FBgn0039747	0.767180442	0.278755089	0.321127946	0.589638641
FBgn0260006	0.019222056	0.00589877	0.002329241	0.011637266
FBgn0037541	0.419275101	0.197784167	0.171399526	0.387330798
FBgn0036053	0.454112838	0.215523139	0.199558744	0.479392308
FBgn0002945	0.002498106	0.000720619	0.002224124	0.002583914
FBgn0037843	0.519162547	0.305572731	0.244124928	0.587505178
FBgn0042135	0.860625813	0.38448064	0.335664828	0.70538227
FBgn0031307	0.643918368	0.235335301	0.324381862	0.57879647
FBgn0014133	0.693971035	0.36228012	0.257142567	0.607909449
FBgn0002645	0.480789157	0.199862836	0.229577718	0.498899688
FBgn0015040	-0.003001392	-0.006579434	0.003971189	-0.012284815
FBgn0266253	1.290701075	0.738141896	0.473247652	1.238567002
FBgn0001941	0.603313936	0.314049604	0.28154545	0.611637986
FBgn0014029	0.597203394	0.301996654	0.22933347	0.560760537
FBgn0015575	0.117429695	0.003725352	0.103836178	0.145317686
FBgn0053462	0.079925238	0.081472686	-0.074691569	0.015209367
FBgn0032670	0.138513909	0.025546361	0.06109851	0.091213525
FBgn0036433	0.267448354	0.110062142	0.152207187	0.250036907
FBgn0003890	0.886707868	0.345132066	0.387086532	0.746814566
FBgn0028546	0.652366452	0.326858601	0.289259222	0.631652375
FBgn0086708	0.16224547	0.080549373	0.104264959	0.192840568
FBgn0053111	0.427211798	0.238980695	0.17544844	0.429835856
FBgn0044826	0.624348016	0.288782135	0.319464343	0.623708437
FBgn0032499	0.536637982	0.268138419	0.181002144	0.458479798
FBgn0262808	0.141816719	0.095050576	0.169520068	0.264341942
FBgn0030114	0.331832914	0.126599833	0.137116729	0.253885444
FBgn0263930	0.494826742	0.276085543	0.277892869	0.543331017
FBgn0040104	0.123488807	0.039343226	0.023166291	0.045200332
FBgn0250868	0.30947374	0.162533946	0.153626396	0.311749594
FBgn0019968	0.59343892	0.263137537	0.27009374	0.541617162
FBgn0263324	-0.009430112	0.002189229	-0.013409507	-0.006893811
FBgn0031150	0.697541649	0.256124992	0.350170121	0.597907789
FBgn0036805	0.619888	0.296690416	0.275396794	0.577874611
FBgn0001105	0.630268239	0.276808055	0.295322171	0.571449092
FBgn0265413	0.91717367	0.48463775	0.482010162	0.969245661
FBgn0013765	0.467832586	0.233858131	0.213509659	0.430052509
FBgn0024321	0.34726914	0.168401466	0.197079797	0.367241388
FBgn0030933	-0.002481389	0.004760467	-0.005333322	0.000902498
FBgn0037142	0.051025055	0.023736961	-0.00025425	0.049012467
FBgn0034443	0.692083729	0.265891812	0.407347305	0.647082968
FBgn0035236	0.267347813	0.154867146	0.166880973	0.269453121
FBgn0260945	0.265571013	0.121210978	0.168735438	0.277805252
FBgn0038037	0.420426639	0.173256091	0.119340254	0.255693882
FBgn0038744	0.122085085	0.083491926	0.045584394	0.126292952
FBgn0029002	-0.007473887	-0.016883806	-0.003781592	-0.042875584
FBgn0039398	-0.009361508	0.003251781	-0.00442587	0.000480002
FBgn0037447	0.084744706	0.017989499	0.037734564	0.052272395
FBgn0052407	0.158218258	0.087609581	0.079972437	0.157775909
FBgn0033063	-0.006860287	0.00108869	-0.012400191	-0.012108904
FBgn0262582	0.702546624	0.356602268	0.200215519	0.565424641
FBgn0052655	0.000238006	0.005737255	-0.013706903	-0.007624492
FBgn0085488	0.0013545	0.002565529	-0.005434411	-0.00172359
FBgn0035009	-0.007966051	0.003441993	-0.014587498	-0.012837014
FBgn0030716	0.005675123	-0.001541959	-0.004189262	-0.00843403
FBgn0061198	0.369453713	0.215504501	0.214898036	0.470216116
FBgn0040206	0.767872886	0.364746805	0.309173805	0.641160787
FBgn0028514	0.447450066	0.316038069	0.193830447	0.505582919
FBgn0035852	-0.00896076	0.00685162	-0.019784193	-0.017661605
FBgn0013771	0.021094901	0.008531092	0.021663798	0.034370939
FBgn0003206	0.525704045	0.220511228	0.231863132	0.408285776
FBgn0039088	0.001663942	0.009217597	-0.009452653	-2.03E-05
FBgn0040723	0.037714719	0.026538097	0.031385083	0.055480867
FBgn0031821	-0.002418875	0.001988443	-0.005390894	-0.00544898
FBgn0001092	0.967047954	0.48440636	0.385519516	0.903961333
FBgn0020510	0.518841812	0.244276127	0.261174738	0.513383561
FBgn0052783	-0.018716148	-0.010505899	-0.008581841	-0.025538467
FBgn0052786	-0.00506033	-0.003609849	0.000154637	-0.00375702
FBgn0003557	0.219026031	0.131941625	0.114649038	0.245425346
FBgn0033980	0.002638247	0.007439805	0.006007857	0.010927132
FBgn0036697	0.157163805	0.075441137	0.063934702	0.17059032
FBgn0036518	0.697894152	0.396864641	0.267674343	0.621221376
FBgn0025628	0.464805743	0.145672816	0.341744188	0.482963628
FBgn0037386	1.035868436	0.566542735	0.337825251	0.898219931
FBgn0028424	0.207302464	0.041667517	0.108237052	0.189825105
FBgn0086532	0.441336835	0.286138958	0.16805226	0.427251554
FBgn0039844	0.838600536	0.563203932	0.249978487	0.835458196
FBgn0031463	-0.00218507	0.004730581	-0.010087271	-0.004952121
FBgn0259923	0.529016926	0.268006321	0.227791481	0.51692142
FBgn0029167	-0.289424554	-0.219701356	-0.006659772	-0.223643489
FBgn0261649	-0.003222524	-0.001262417	-0.00224169	-0.00598755
FBgn0053276	-0.011724817	-0.00568629	0.026657802	0.009307118
FBgn0054054	-0.040620783	-0.027510436	-0.040099925	-0.0606735
FBgn0085261	-0.045886455	-0.069887645	-0.063594446	-0.129848557
FBgn0045073	0.49632383	0.2417823	0.21527777	0.418399748
FBgn0051279	-0.001786624	0.006011474	-0.004840257	-0.006045777
FBgn0266673	0.133130538	0.099020123	0.072359335	0.171887533
FBgn0025641	0.338614614	0.250436421	0.113408521	0.356140326
FBgn0029710	0.160943166	0.095460193	0.012363509	0.112995389
FBgn0010051	0.491836244	0.292100414	0.171074666	0.464149606
FBgn0034417	0.615241377	0.348622467	0.26094214	0.657934566
FBgn0029976	0.023530662	0.017665799	0.029491156	0.07258194
FBgn0040813	-0.395028807	-0.37572603	-0.196599472	-0.611149969
FBgn0032624	-0.014357969	-0.001724392	-0.013012463	-0.018754868
FBgn0039801	0.046971928	0.015679259	0.036083225	0.037421358
FBgn0034946	0.1231652	0.073176928	0.085176437	0.164390934
FBgn0086694	0.301113728	0.118617338	0.075653741	0.210323218
FBgn0029155	0.06694636	0.07012213	0.04180876	0.110101224
FBgn0014865	0.314946784	-0.056757626	0.699842683	0.559235554
FBgn0031250	0.119667387	0.10716736	-0.025290762	0.111931343
FBgn0259178	0.392025691	0.189668978	0.1803521	0.392098766
FBgn0001104	0.569289898	0.286134872	0.215392568	0.525938087
FBgn0036752	0.86366321	0.452554499	0.274365224	0.741284968
FBgn0032318	0.912856963	0.290883269	0.712342362	1.047092742
FBgn0040904	-0.00364162	0.006106383	-0.008167972	-0.003885307
FBgn0035445	0.024272167	-0.001559106	-0.002656481	0.00285675
FBgn0283712	0.572744736	0.248178504	0.208969721	0.464052109
FBgn0267635	0.053424404	0.057276064	0.030108985	0.069494824
FBgn0024277	0.338279358	0.240278071	0.155725772	0.326970564
FBgn0040395	0.319242815	0.138292952	0.130217464	0.29662038
FBgn0260049	0.546025761	0.30555014	0.192446264	0.484992216
FBgn0261988	0.635385553	0.333076171	0.294229827	0.585481196
FBgn0039759	0.765784346	0.67159377	0.298706401	1.015141606
FBgn0030796	-0.111384478	0.034532108	0.044529914	0.041637786
FBgn0262563	0.372174658	0.1666091	0.24980765	0.436967633
FBgn0031374	0.510775531	0.334312004	0.199824632	0.510016607
FBgn0267001	0.164560168	0.019511896	0.130411069	0.178407842
FBgn0263346	0.627822212	0.265129536	0.286164678	0.588975379
FBgn0004636	0.71537405	0.326057898	0.302750314	0.675329154
FBgn0267487	0.516382289	0.254731424	0.18271568	0.455261865
FBgn0033188	0.518394918	0.186748174	0.347530548	0.531118178
FBgn0032192	-0.003729963	-0.004893545	-0.001256094	-0.002338458
FBgn0000017	0.565996613	0.307701667	0.25339792	0.501197638
FBgn0036931	-0.008638008	-0.000435133	-0.013140547	-0.011890364
FBgn0023407	0.333860075	0.186697798	0.156217459	0.349371874
FBgn0034408	0.536163464	0.380983576	0.334658656	0.672645202
FBgn0264344	0.000523387	0.00827647	-0.012453469	-0.005935585
FBgn0004133	0.043751653	0.067431512	-0.009724943	0.054963168
FBgn0034315	0.407221629	0.255188518	0.158329328	0.413204222
FBgn0036309	0.334600509	0.165628289	0.143171596	0.29264748
FBgn0033134	0.224794388	0.119680187	0.133113131	0.246834945
FBgn0037753	0.12425171	0.077287709	0.042172863	0.119572392
FBgn0285896	0.263283328	0.094533431	0.112054712	0.209955305
FBgn0085442	0.688541812	0.349981014	0.316523411	0.661528499
FBgn0020385	-0.011548733	-0.004543536	-0.008007872	-0.016817455
FBgn0035993	-0.000993963	-0.005395174	0.016079852	0.024936162
FBgn0031600	0.148446654	0.128866932	0.082673322	0.260486134
FBgn0003205	0.545103242	0.232499687	0.251850455	0.462165546
FBgn0030847	0.604370254	0.355460532	0.296336722	0.644095618
FBgn0011828	-0.398871961	-0.409331809	-0.153279501	-0.538979981
FBgn0043070	0.67860389	0.221829549	0.393768901	0.577214838
FBgn0032588	-0.003795258	-0.000664943	-0.004945711	-0.006686221
FBgn0010406	0.41400403	0.210838101	0.223704784	0.478600336
FBgn0031791	0.730321648	0.240814501	0.526862844	0.749641561
FBgn0000152	0.109311758	0.058962423	0.029238214	0.0678744
FBgn0003687	-0.03734522	-0.006172182	0.001494778	0.000359857
FBgn0265174	0.492719803	0.221827431	0.201927555	0.374922525
FBgn0037315	0.250645915	0.146922541	0.109361158	0.255574076
FBgn0030575	0.090761546	0.050254656	0.036405414	0.077076213
FBgn0266186	0.514458989	0.178796962	0.270785883	0.380230186
FBgn0032821	0.271773633	0.138361084	0.045144358	0.190362504
FBgn0040236	0.289372679	0.123889739	0.136328933	0.203120362
FBgn0010424	0.953780637	0.338762712	0.643416218	0.99064014
FBgn0047178	0.590820957	0.215346267	0.28802978	0.476080803
FBgn0032249	0.00783201	0.004669592	0.002504913	0.010602667
FBgn0001257	0.040327547	0.067485284	0.06435006	0.113547512
FBgn0032699	0.146948241	0.053366815	0.106777696	0.143539902
FBgn0037074	0.14716638	0.06765499	0.115431398	0.158977279
FBgn0032587	0.104741663	0.104619227	0.05504495	0.169706012
FBgn0036806	0.006058558	-0.002375533	-0.005462226	0.025986118
FBgn0262716	0.711891537	0.32610509	0.294048617	0.600569622
FBgn0027082	-0.003219202	-0.006012839	0.006289152	0.002274062
FBgn0015286	0.51830873	0.246699366	0.219972762	0.405368417
FBgn0013953	0.03659157	0.005812701	0.000532685	0.008905019
FBgn0033502	0.118280028	0.040482898	0.08386583	0.141575588
FBgn0015795	0.638911146	0.279712655	0.295797662	0.607495734
FBgn0262112	-0.031839309	-0.026749843	-0.005119403	-0.023381346
FBgn0262815	0.019880893	0.01154664	-0.0013304	0.013655589
FBgn0053558	0.058138741	0.09053754	0.040891444	0.110814889
FBgn0036496	-0.010409125	-0.003627637	-0.004832989	-0.013248212
FBgn0026630	0.322633659	0.199829629	0.134955776	0.356902761
FBgn0030638	-0.000275576	-0.008299675	0.007094525	0.013836322
FBgn0028671	0.358179877	0.210675513	0.147725412	0.343649071
FBgn0261570	0.558868856	0.320466772	0.188477949	0.504483994
FBgn0026084	0.787524376	0.318860528	0.438284595	0.809644097
FBgn0266417	0.58071638	0.304276148	0.163165862	0.4103507
FBgn0016078	0.405478919	0.259901688	0.116816117	0.395702778
FBgn0032400	0.876887116	0.376593385	0.468459396	0.863971373
FBgn0051955	-0.061343412	0.034457096	-0.037359064	-0.00409305
FBgn0033799	-0.007172195	-0.002024642	-0.00555193	-0.007186889
FBgn0003660	0.688584262	0.291521664	0.231700352	0.567660246
FBgn0033051	0.214675838	0.074574449	0.099481521	0.118850281
FBgn0035401	0.247126489	0.156163595	0.090628624	0.214786787
FBgn0266724	0.059369345	0.014491529	0.033796482	0.055039104
FBgn0003514	0.578818496	0.260346542	0.232704174	0.544021572
FBgn0051769	0.661068178	0.416332426	0.422974647	0.88975869
FBgn0031637	0.336229145	0.169973002	0.080200921	0.278219497
FBgn0030090	0.374365109	0.227170177	0.172048835	0.388259873
FBgn0067311	0.038992794	0.009759154	0.030648271	0.0430986
FBgn0011232	0.369664352	0.129287407	0.177889641	0.319575952
FBgn0038098	0.232136263	0.077745546	0.103079885	0.162522657
FBgn0001961	0.514057974	0.199217433	0.245825165	0.421657311
FBgn0024236	0.089295373	0.084117476	0.075201512	0.18108574
FBgn0030670	0.587399539	0.271025965	0.23598973	0.527484023
FBgn0036341	0.520778427	0.222691322	0.24162128	0.424029172
FBgn0025631	0.211233772	0.102476539	0.187644147	0.301801772
FBgn0261258	0.257318235	0.200683286	0.155351104	0.296300745
FBgn0031298	0.128119297	0.040836003	0.070506766	0.100180737
FBgn0032079	-0.005029408	-0.001425252	0.000488713	-0.001506972
FBgn0032955	0.214989693	0.073551816	0.087663925	0.153335131
FBgn0266376	-0.33765579	-0.135581794	-0.20922357	-0.408840229
FBgn0054029	-0.0065786	0.005315149	-0.01396776	-0.001128161
FBgn0267978	-0.001178521	-0.000866545	0.002262512	0.002893209
FBgn0034312	0.150647973	0.039122941	0.096405651	0.145481475
FBgn0052425	0.166165146	0.083968385	0.103610324	0.21648523
FBgn0033928	0.227695832	0.147282715	0.205755697	0.32319745
FBgn0029932	1.113603667	0.495444495	0.50143143	0.994563978
FBgn0035603	0.538695553	0.364088561	0.286359507	0.669635804
FBgn0051141	-0.001764349	0.009802305	-0.015668299	-0.009671019
FBgn0035952	-0.013323604	-0.0041943	-0.009483611	-0.014671002
FBgn0033268	-0.008012428	0.03406312	-0.024398908	-0.017285946
FBgn0261628	-0.237829524	-0.050295036	-0.238604466	-0.236967834
FBgn0051523	0.142985182	0.108558665	-0.009676085	0.093662455
FBgn0037714	-0.007913758	-0.005118871	-0.011340277	-0.020144315
FBgn0026319	-0.012036887	0.004655199	-0.009905855	0.007069738
FBgn0262160	0.769844939	0.449637555	0.267320091	0.711001997
FBgn0036877	0.389069281	0.170198094	0.159942922	0.333110024
FBgn0014127	-0.018803597	0.008297878	-0.005906028	0.003446698
FBgn0035964	0.528738497	0.198544204	0.299287105	0.516501732
FBgn0243516	0.38265956	0.216386536	0.131853772	0.305079286
FBgn0037539	0.050435374	0.032074825	0.010242697	0.026697575
FBgn0266720	0.295400648	0.217909441	0.092562185	0.295529889
FBgn0038299	0.458653853	0.3309356	0.22494033	0.485130023
FBgn0035623	0.76637974	0.490452715	0.306323483	0.793822912
FBgn0046687	0.499822884	0.349899135	0.208326053	0.513173453
FBgn0027558	0.251881465	0.120946496	0.10913429	0.251650918
FBgn0261458	0.534189333	0.17812908	0.294362865	0.502273719
FBgn0031853	-0.00838758	-0.002277184	-0.004905087	-0.004776426
FBgn0052672	0.551659399	0.205693847	0.283254834	0.499239928
FBgn0028916	0.812891152	0.349302529	0.352761893	0.686413568
FBgn0020372	0.015392929	-0.018071539	0.002161927	-0.006317229
FBgn0035812	-0.009043399	-0.011726035	-0.002424656	-0.011955381
FBgn0028490	0.570306963	0.190248282	0.340325222	0.508027981
FBgn0085188	0.253236652	0.139359627	0.124257419	0.251607042
FBgn0001224	-0.158795742	0.116387666	-0.159458339	-0.082918609
FBgn0038973	0.018543123	-0.017874737	-0.017999161	-0.041718921
FBgn0085212	0.00542472	0.007570574	0.027430269	0.041987382
FBgn0035528	0.036656934	0.003912501	-0.034587058	-0.002117187
FBgn0040319	0.10479003	0.068475925	0.118280134	0.169373863
FBgn0259711	0.158303885	0.045861125	0.121455288	0.13599514
FBgn0032205	0.006913858	-0.002788296	0.008652907	-0.007990359
FBgn0000299	-0.384719432	-0.319640844	-0.107692671	-0.443369931
FBgn0031343	-0.005587518	0.009279708	-0.013368297	-0.001109682
FBgn0051999	-0.013933576	-0.016425845	-0.00847024	-0.020190569
FBgn0032633	-0.090525917	-0.024387065	0.010440661	-0.01320127
FBgn0034638	0.481835645	0.141250744	0.396045752	0.519529987
FBgn0000083	0.544820616	0.176711789	0.290603833	0.480550908
FBgn0262127	0.069529908	0.094048804	0.056007998	0.117897062
FBgn0013343	0.5052189	0.243924668	0.294172867	0.567471685
FBgn0260746	0.48450084	0.282499626	0.12085949	0.36460575
FBgn0035146	0.115491966	0.037298548	0.102081102	0.148274436
FBgn0001258	0.809686064	0.349599189	0.417407929	0.79541745
FBgn0039488	-0.028492842	-0.014615806	0.017140209	-0.017915638
FBgn0023081	0.099770846	0.032178826	0.074278685	0.114054628
FBgn0025865	0.42577083	0.323653125	0.168766459	0.490918586
FBgn0032014	0.083144956	0.055594092	0.017205252	0.083555932
FBgn0032694	0.263656958	0.16551325	0.149288955	0.283586639
FBgn0063494	0.178247007	0.034846158	0.275669969	0.277248321
FBgn0011742	0.417825417	0.285856945	0.144904148	0.446514065
FBgn0053461	0.258242544	0.145136422	0.209591563	0.376338981
FBgn0029157	0.077976067	0.064976803	0.018648508	0.090842765
FBgn0052311	0.107707158	0.042085797	0.060820757	0.106155369
FBgn0262114	0.181113333	0.088322123	0.033995161	0.100191267
FBgn0036929	0.314062402	0.1910786	0.169229194	0.386752216
FBgn0000043	0.436786186	0.219791886	0.149835295	0.370994383
FBgn0030286	0.365685417	0.191183268	0.14923704	0.337716538
FBgn0036886	-0.037893407	-0.013426809	0.02708139	-0.014764984
FBgn0031693	-0.01364289	0.013552948	-0.029041622	-0.025572859
FBgn0026787	0.199048429	0.098913513	0.084674741	0.187521422
FBgn0263585	-0.00091268	0.003803776	-0.002643146	0.002665152
FBgn0034838	-0.00338245	0.001049432	-0.009777714	-0.006513764
FBgn0041789	0.666285709	0.365961063	0.280979114	0.653581791
FBgn0033960	-0.004279939	-0.002574581	-0.000157527	3.39E-05
FBgn0030890	0.090739719	0.037918047	0.06200146	0.109936143
FBgn0026148	-0.012772605	-0.001862051	-0.012357439	-0.010675581
FBgn0013763	-0.422057638	-0.418665137	-0.095999031	-0.560151642
FBgn0034566	-0.004195146	0.007719503	-0.013891597	-0.005197438
FBgn0036740	0.32605476	0.168631661	0.193112504	0.392957339
FBgn0004574	0.493956871	0.269518664	0.197795821	0.531727882
FBgn0039969	0.247565954	0.144779928	0.102866442	0.257355825
FBgn0000636	0.41536085	0.214295227	0.264182831	0.508387804
FBgn0031253	-0.012110381	-0.005830336	0.081392967	0.115754893
FBgn0032533	-0.00098372	0.001374533	-0.004168531	0.000835634
FBgn0033032	0.575843933	0.210697825	0.32064618	0.539483848
FBgn0086370	0.521068315	0.248535175	0.210130552	0.462543202
FBgn0052066	0.585282396	0.333784399	0.214250678	0.491514167
FBgn0030412	0.587737254	0.230776542	0.295997225	0.534026542
FBgn0037454	-0.004601624	0.006420647	-0.01267076	-0.003875345
FBgn0000071	-0.062169077	0.06710041	-0.108727487	-0.044433469
FBgn0037906	0.015200254	-0.022581181	0.132872165	0.053713478
FBgn0051363	0.74108138	0.333882045	0.291531029	0.670659224
FBgn0085233	-0.000720532	0.004737039	-0.002316943	-0.00021249
FBgn0085307	0.144066289	0.116120588	0.047096641	0.157445209
FBgn0035515	0.003349547	0.0339473	-0.039380618	-0.016245376
FBgn0038912	0.044714869	0.039873801	-0.020066983	0.055304873
FBgn0004908	0.240032078	0.114905947	0.149770121	0.247786277
FBgn0035955	-0.010279188	0.000548386	-0.006392068	-0.008569244
FBgn0037857	0.000259147	-7.66E-05	-0.001338247	0.000970618
FBgn0052264	0.552536973	0.26834097	0.296158673	0.587522648
FBgn0050460	0.395717525	0.121098848	0.26788222	0.393510022
FBgn0040670	-0.00085808	-0.004424836	0.007551281	0.009029817
FBgn0034010	-0.485284447	-0.523336842	0.144926406	-0.345188673
FBgn0052579	0.101054539	0.038660101	0.038380152	0.04642319
FBgn0003447	0.686560353	0.318399213	0.331623366	0.663114064
FBgn0012037	0.030769167	-0.049405557	0.050476222	0.000280237
FBgn0085443	0.121153283	0.031463902	0.119096401	0.123717627
FBgn0003137	-0.387239117	-0.209697345	-0.100478216	-0.317967157
FBgn0037008	-0.029860688	-0.01958799	0.003822186	-0.007511843
FBgn0013718	0.50728352	0.292779394	0.209555493	0.506770756
FBgn0035400	0.412259167	0.195704602	0.140268421	0.325630324
FBgn0020620	0.239777123	0.163079837	0.105628586	0.300311953
FBgn0053542	0.237821452	0.193641131	0.118703367	0.284826686
FBgn0010246	0.472896914	0.183075103	0.277401462	0.465441905
FBgn0038763	0.038155237	0.059981796	0.020533732	0.085755164
FBgn0030629	-0.006547775	0.00241443	-0.011720108	-0.005293245
FBgn0015513	0.344679076	0.190963034	0.207269527	0.400621821
FBgn0034723	0.102763444	0.038896328	0.074064676	0.115581203
FBgn0037094	0.207458275	0.062814487	0.100953237	0.172943772
FBgn0026090	0.261181116	0.125471905	0.14886119	0.289428871
FBgn0002948	-0.030572015	-0.014482882	0.002722951	-0.031612992
FBgn0039178	-0.017806576	0.000701441	-0.025676072	-0.016771457
FBgn0015000	0.311856894	0.175230751	0.092119619	0.234049934
FBgn0044511	-0.036848138	-0.027168227	0.165878988	0.159594719
FBgn0267727	-0.461880199	-0.255568042	-0.041127694	-0.325717171
FBgn0030799	0.106933359	0.095913815	-0.016015109	0.112382375
FBgn0039070	-0.001855483	0.002006266	-0.000228973	0.001688039
FBgn0001114	-0.38752559	-0.314939533	-0.215923145	-0.548847892
FBgn0037751	0.006054194	0.008390819	-0.004979569	0.007227375
FBgn0260005	0.176597468	0.050018727	0.098669493	0.13846763
FBgn0040259	0.22920427	0.094971298	0.137492675	0.260927603
FBgn0035772	0.327393932	0.198495295	0.202089353	0.4271329
FBgn0000414	0.225894994	0.18418374	0.106304302	0.281743092
FBgn0040238	0.054180524	0.055623127	-0.002926593	0.062521658
FBgn0262687	-0.008883123	0.001073655	-0.013658163	-0.010362125
FBgn0034999	-0.008100267	-0.008519894	-0.001656684	-0.020964922
FBgn0038708	-0.00102041	0.004195357	-0.009509073	-0.005965957
FBgn0026562	-0.394995969	-0.286329712	-0.177537751	-0.466766622
FBgn0020251	0.566180263	0.200882209	0.306245853	0.522853409
FBgn0039023	0.011284351	0.017556799	-0.008683134	0.006305964
FBgn0019643	-0.037339938	-0.023353895	-0.004897175	-0.022341109
FBgn0035896	0.40145751	0.176193317	0.130462025	0.292306941
FBgn0011570	0.36123689	0.150210396	0.204081687	0.345599696
FBgn0036318	0.425944606	0.15867212	0.191829725	0.36014453
FBgn0053523	0.132176984	0.101875821	0.026461299	0.156549717
FBgn0036298	0.58519318	0.271875453	0.266691728	0.530536689
FBgn0035142	0.354480691	0.102523875	0.193946917	0.281569816
FBgn0039461	0.018339969	0.023998234	0.010338977	0.057836747
FBgn0036696	-0.033723064	-0.023250063	0.040943374	0.021249156
FBgn0032005	0.449014038	0.265503076	0.161070236	0.433033032
FBgn0030752	0.240144336	0.11033346	0.20072437	0.308025288
FBgn0003093	0.666993681	0.328655511	0.267630669	0.593101094
FBgn0265178	0.016171785	-0.018118846	-0.002765427	-0.027685836
FBgn0262477	0.244440021	0.110770317	0.117129275	0.226537141
FBgn0283666	0.315242354	0.220986623	0.120324255	0.343865445
FBgn0063491	0.028299798	0.009341819	0.041419734	0.049500676
FBgn0026570	0.194029527	0.07251075	0.099902708	0.167261441
FBgn0032156	0.387129565	0.170604592	0.213237692	0.382465914
FBgn0031134	-0.003139273	0.010468361	-0.014008228	-0.002854991
FBgn0261563	0.199148841	0.060433234	0.113852981	0.207156867
FBgn0027611	-0.346250889	-0.197422212	-0.147802655	-0.313952355
FBgn0051158	0.205437539	0.106734928	0.122955086	0.231183227
FBgn0010909	0.601849722	0.295448245	0.273887273	0.535098219
FBgn0028664	0.041690064	0.024353357	0.037165886	0.059385378
FBgn0003884	0.427338402	0.12966958	0.202862002	0.34033134
FBgn0035309	0.019220109	0.013933712	-5.73E-05	0.021455858
FBgn0027080	0.079867186	0.064924812	0.084369573	0.095158831
FBgn0011225	0.060954795	0.035447525	0.01489692	0.047024023
FBgn0284249	0.253901806	0.107997888	0.098568263	0.263993826
FBgn0032025	0.068440603	0.00855848	0.05120815	0.048034767
FBgn0085354	0.457883611	0.196798284	0.269264309	0.483872901
FBgn0032197	0.090051652	0.036208224	0.032892683	0.056222578
FBgn0036237	0.251090946	0.139749755	0.144004601	0.296745024
FBgn0036522	0.006364462	0.013226273	0.016170882	0.017626832
FBgn0031631	-0.001867416	0.005446852	-0.005036701	0.003443571
FBgn0053665	0.005863495	0.00343398	-0.001457666	0.00445889
FBgn0035975	0.195776763	0.092840509	0.055412009	0.144991478
FBgn0033677	0.014841461	0.013113627	0.010605027	0.016293028
FBgn0037235	0.060012222	0.088338645	-0.022936493	0.067192664
FBgn0001149	0.671682943	0.202393344	0.252983405	0.484174672
FBgn0034451	0.489126123	0.221332988	0.233664002	0.45911236
FBgn0035999	-0.003846904	-0.002179613	0.006504037	-0.002529416
FBgn0033092	-0.048179492	-0.043823194	0.009431842	-0.039021572
FBgn0039711	-0.012770898	-0.009413333	0.007032015	-0.004813736
FBgn0263390	0.004634392	-0.002443985	0.023037514	0.01591877
FBgn0034057	0.018717413	0.026017623	0.012740424	-0.03120325
FBgn0035203	0.416759842	0.194441288	0.163666134	0.397028416
FBgn0038773	-0.003823282	0.004689799	-0.010489356	-0.012212764
FBgn0052533	0.00829414	0.002582838	0.017874531	0.028424346
FBgn0035776	0.045555713	0.027801086	0.024327073	0.054983065
FBgn0005666	-0.048969454	-0.039055219	-0.002913241	-0.043837329
FBgn0037387	0.2599081	0.087053143	0.181255272	0.257587015
FBgn0037465	0.392356416	0.19779488	0.130086119	0.348538042
FBgn0015393	-0.503401159	-0.248031834	0.055329686	-0.223302819
FBgn0261461	0.485273771	0.229545094	0.313238221	0.583917352
FBgn0033265	0.065394484	0.020292281	0.013132122	0.019754023
FBgn0037647	0.313688753	0.13724651	0.16057866	0.320353332
FBgn0004687	0.477755579	0.16502904	0.301052816	0.442668164
FBgn0267252	0.220939873	0.188847843	0.094540979	0.265073999
FBgn0035034	-0.002861034	-0.002902535	0.000787294	-0.000370411
FBgn0015279	0.248153543	0.131649451	0.077522564	0.195298479
FBgn0001075	0.003119144	-0.001354081	0.002407259	-0.004252754
FBgn0033366	-0.053027973	-0.038886973	-0.025818171	-0.064066811
FBgn0034271	-0.011915655	-0.003416857	0.000660973	0.010665216
FBgn0015240	0.067553798	0.038562747	-0.018417762	0.032003148
FBgn0261547	0.393172711	0.221458464	0.144839592	0.3539914
FBgn0033376	0.004755278	0.010566184	0.039006753	0.039520099
FBgn0038149	0.592985347	0.247339898	0.383129721	0.660900706
FBgn0037166	0.193473357	0.07112888	0.092400193	0.193357305
FBgn0032634	0.037569172	0.012929381	0.055378067	0.087023278
FBgn0037536	0.253485703	0.096807077	0.065060805	0.240804499
FBgn0015791	0.24882176	0.103754395	0.107101654	0.195341252
FBgn0035589	0.309178185	0.193052142	0.163628284	0.378283806
FBgn0065032	0.320327414	0.157987341	0.17364708	0.326450841
FBgn0264494	0.18833734	0.169028563	0.01903984	0.212956318
FBgn0011695	0.001386275	0.000422993	0.007415578	0.013260978
FBgn0052194	0.162859762	0.04001637	0.080016663	0.103437132
FBgn0029825	0.008953836	0.03699586	-0.002329611	0.061367227
FBgn0043001	0.039684274	0.006489009	0.031180236	0.030292317
FBgn0267057	0.018241599	0.008146828	0.005676309	0.016203317
FBgn0024361	0.134364572	0.062308031	0.054146585	0.109933267
FBgn0001250	0.069439702	0.012994208	0.041760637	0.064204706
FBgn0033474	0.154090364	0.08381364	0.058674839	0.1854294
FBgn0038685	0.000648272	0.001869835	-0.002482291	0.002780378
FBgn0040260	-0.020854689	-0.004275392	-0.046243144	-0.04866832
FBgn0265185	0.076083505	0.055487615	0.066670109	0.141285191
FBgn0036485	0.313757723	0.152695796	0.12475789	0.246139964
FBgn0025457	-0.076928953	-0.052106187	0.060917801	0.013346444
FBgn0000308	0.378691986	0.170703163	0.157079707	0.348428251
FBgn0035497	0.274342662	0.120164202	0.146927685	0.285460856
FBgn0032698	-0.034366314	-0.004614083	-0.002904278	-0.001038127
FBgn0035557	0.054149214	0.030324662	0.032183698	0.041904171
FBgn0264087	0.268872142	0.101308688	0.220042665	0.309215423
FBgn0040285	0.506507361	0.219094249	0.261621521	0.495917298
FBgn0004569	0.483448744	0.378056526	0.231396494	0.624520224
FBgn0086355	0.626432472	0.32141483	0.387163087	0.729160417
FBgn0027780	-0.002588847	-0.008190121	0.011466248	0.002022933
FBgn0029737	0.39982975	0.176720148	0.092389142	0.295276589
FBgn0036896	0.155408957	0.135472965	0.062517478	0.174892882
FBgn0051687	-0.011336386	-0.004301847	-0.011174466	-0.021274974
FBgn0052112	0.001275367	0.002970206	-0.001335731	0.008895805
FBgn0031776	0.338034732	0.207463558	0.288653861	0.47797114
FBgn0039538	-0.001694228	-0.005900668	0.005676766	0.013272532
FBgn0033712	0.019855518	0.026646599	0.020644099	0.048532976
FBgn0030160	0.303596071	0.066108503	0.276720183	0.330968096
FBgn0015229	0.609620315	0.198251256	0.365522445	0.563445055
FBgn0025335	0.28880827	0.17425919	0.142288335	0.310450166
FBgn0264389	0.158701494	0.101356374	0.01857863	0.101756105
FBgn0266446	0.055396247	0.012951827	0.047221837	0.058489823
FBgn0038720	0.291252533	0.135316413	0.137317679	0.269679305
FBgn0029971	0.00075787	0.007077994	-0.013156745	0.002360395
FBgn0031450	0.110744553	0.039899342	0.090133642	0.150763923
FBgn0259937	-0.491278507	-0.265659554	-0.031118627	-0.286176732
FBgn0032200	0.286605645	0.126706718	0.170041262	0.310725248
FBgn0031268	0.138412986	0.042517665	0.11208272	0.144003324
FBgn0014009	0.504513682	0.201784855	0.209713502	0.427717441
FBgn0051949	-0.00139449	0.001787888	0.000310305	0.000612703
FBgn0029789	0.031780296	0.008229745	0.021767174	0.05326297
FBgn0036212	0.000745857	0.003971719	-0.00294518	-9.69E-05
FBgn0265525	-0.006244135	-0.011440031	0.005498805	-0.003230099
FBgn0042106	0.816466893	0.857379451	0.361022701	1.197905615
FBgn0031971	0.081642994	0.005995492	0.075317466	0.097426817
FBgn0262017	-0.003307253	0.004840014	-0.005081794	0.001440966
FBgn0040765	0.392829725	0.218348725	0.177367168	0.479121183
FBgn0031973	-0.010221572	0.019983033	-0.023068671	0.007605149
FBgn0050147	0.036284551	0.021943817	0.023063716	0.041598573
FBgn0031597	-0.008784735	0.00075717	-0.009168312	-0.001526785
FBgn0053107	-0.019064771	-0.011027802	-0.004466259	-0.027889241
FBgn0032354	-0.007593752	0.005775888	-0.009855333	-0.007090766
FBgn0027844	0.126978697	0.04985912	0.112340803	0.168608432
FBgn0046247	0.043368949	0.04386704	0.052594014	0.079321462
FBgn0014018	0.224558646	0.105671091	0.09983571	0.275885151
FBgn0004380	0.182950048	0.086927319	0.059411947	0.124099318
FBgn0051415	-0.012368502	-0.004179394	-0.010903307	-0.012093615
FBgn0040784	-0.000155351	0.004270534	-0.00338207	-0.000523432
FBgn0031143	0.48367515	0.270301084	0.21061887	0.470010109
FBgn0035194	0.002848879	0.019635313	8.33E-05	0.01466098
FBgn0032486	0.003967458	0.005837207	0.012211811	0.013782698
FBgn0016031	0.033364872	0.088934079	0.122593133	0.223415581
FBgn0010812	0.227242379	0.130259906	0.116386644	0.267014153
FBgn0025558	0.384019296	0.219599234	0.191783484	0.382121183
FBgn0030499	-0.007208546	0.013536878	0.004201077	0.006788124
FBgn0036311	-0.010219549	-0.000789381	-0.012382321	-0.013451796
FBgn0266405	0.014425982	-0.002599371	0.014328226	0.015929497
FBgn0038569	0.081907458	0.065097963	-0.006185201	0.032067455
FBgn0037554	-0.001630033	-0.017417464	0.040343746	0.028275106
FBgn0035209	-0.105215071	0.003182468	-0.030620071	-0.036991619
FBgn0032378	0.258424843	0.12321416	0.105207177	0.18287433
FBgn0002868	1.228487532	0.782804596	0.267209015	1.076562552
FBgn0051820	0.000929908	0.027494947	-0.034855292	-0.002530157
FBgn0052243	0.176193395	0.098318878	0.1009434	0.163042552
FBgn0264894	0.449194036	0.124448342	0.308775559	0.404080008
FBgn0025885	-0.472512862	-0.381210115	-0.08461514	-0.487028822
FBgn0000077	0.050316855	0.029957549	0.015496921	0.056671921
FBgn0016075	-0.505821581	-0.298383892	-0.231177609	-0.513152108
FBgn0025640	0.082105161	0.014441463	0.047322875	0.00641742
FBgn0004167	-0.352950614	-0.272754783	0.021401518	-0.283300556
FBgn0261244	0.547726531	0.181948272	0.40373738	0.559219897
FBgn0022027	0.362102869	0.156370661	0.170618057	0.308219755
FBgn0038330	0.001129561	0.002484652	0.000239173	0.002138816
FBgn0037939	-0.013878869	-0.004326358	-0.011513294	-0.025454091
FBgn0038981	0.340749248	0.174472418	0.159852695	0.352487953
FBgn0262354	0.000147793	0.006084333	-0.005556245	-0.000548214
FBgn0035585	-0.005222413	0.000782375	-0.009918029	-0.009865939
FBgn0066084	-0.313025147	-0.187216915	-0.067403378	-0.260085227
FBgn0026404	0.070797876	0.10839216	-0.002612698	0.086761094
FBgn0085452	0.692991731	0.225201403	0.417628912	0.682760804
FBgn0041582	0.011570476	-0.004572008	0.000959006	-0.002858883
FBgn0035262	0.004679228	0.012217927	-0.006612245	0.003842561
FBgn0029514	0.002837614	0.00276317	0.00736881	0.018133789
FBgn0031610	-0.021263121	-0.008063045	-0.010755092	-0.027979004
FBgn0039098	0.101399567	0.046435736	0.059775586	0.128406234
FBgn0026315	0.512857202	0.197487669	0.249768493	0.421977621
FBgn0053460	0.225831632	0.099835085	0.205778698	0.318855757
FBgn0051807	0.00033041	0.009998682	-0.012231492	-0.002106853
FBgn0035005	-0.002671805	-0.00073706	-0.004452669	-0.001974808
FBgn0003483	0.007650006	0.004106916	-3.42E-05	0.000500955
FBgn0262902	0.068820809	0.023392721	0.043905497	0.057181159
FBgn0036449	0.27786653	0.105961069	0.165398371	0.301462483
FBgn0033212	0.379375539	0.179103786	0.12129728	0.280482277
FBgn0034626	0.046263133	0.009934838	0.029403973	0.049795746
FBgn0267668	0.120015471	0.091095608	0.042263466	0.090201706
FBgn0028552	0.293142375	0.124132823	0.197592808	0.31955393
FBgn0041188	0.557436708	0.294492046	0.227555017	0.516458019
FBgn0030614	-0.000162401	-0.001179307	-0.001160422	-0.00011547
FBgn0032246	0.129590381	0.041360616	0.137127698	0.116627063
FBgn0036689	-0.004902388	0.010587945	-0.005890444	0.010626298
FBgn0031886	-0.057906682	-0.030548905	0.015143111	-0.012367881
FBgn0014388	-0.489392669	-0.281630816	-0.044644746	-0.373274949
FBgn0086372	0.531228867	0.28779077	0.189597234	0.489054973
FBgn0034970	0.372898496	0.221304206	0.178227967	0.322607738
FBgn0037846	-0.037350729	-0.019062792	-0.018095456	-0.029073497
FBgn0038319	-0.043310645	-0.048361931	0.05308709	-0.013659941
FBgn0010620	-0.013510901	0.025407002	-0.004373257	0.014209881
FBgn0029660	0.000445122	0.001741626	0.000428369	-0.000851893
FBgn0033402	0.186371627	0.070954569	0.103345659	0.12893098
FBgn0037884	0.164427583	0.04527575	0.147273766	0.181263414
FBgn0267348	-0.458849161	-0.268925517	-0.118651676	-0.348596399
FBgn0262733	0.18807166	0.075175137	0.09361941	0.22316795
FBgn0262989	-0.006222642	-0.003819621	-0.000205458	-0.000735628
FBgn0026721	-0.379994781	-0.276356828	-0.207792172	-0.501224905
FBgn0030018	0.203870808	0.055612029	0.105853882	0.133882474
FBgn0039026	0.418675791	0.212864577	0.21201964	0.395035792
FBgn0035380	-0.001859826	0.00282696	-0.004446098	0.000178248
FBgn0053978	-0.04140874	-0.0079351	-0.04209844	-0.057940557
FBgn0037671	0.316976436	0.132530617	0.196960942	0.274588076
FBgn0021760	0.351936094	0.18931151	0.201945302	0.346601943
FBgn0026479	0.362637005	0.171065587	0.180590473	0.385363336
FBgn0039639	-0.001459062	-0.000819781	0.026400986	0.020243389
FBgn0063493	0.011274905	-0.00204547	0.020351189	0.018127059
FBgn0052643	0.001366912	0.00308155	-0.003289594	-0.000430802
FBgn0283469	0.410292384	0.212101562	0.139578861	0.306939795
FBgn0035767	-0.00355528	0.008427541	0.01763615	-0.008143903
FBgn0038275	-0.119801556	-0.086527611	0.088147048	0.034563723
FBgn0032429	0.33654039	0.152374517	0.21695589	0.347937885
FBgn0036942	0.0164266	0.00991442	0.0011575	0.01827681
FBgn0001230	0.002284154	0.275130576	-0.116025765	0.145420644
FBgn0266418	0.1413769	0.108209477	-0.008765278	0.112839085
FBgn0050495	-0.001833659	0.001838409	0.000346116	-0.00140739
FBgn0034420	0.091313826	0.036221041	0.05856834	0.097459449
FBgn0010235	0.273689237	0.196652399	0.16034811	0.391565012
FBgn0264078	0.190292008	0.049936336	0.074469726	0.148516993
FBgn0020277	-0.000965343	-0.002185038	-0.005699389	-0.019792203
FBgn0033916	0.024154684	0.032529842	0.010499453	0.059571993
FBgn0033240	0.034800684	0.035012364	0.000980824	0.004159716
FBgn0036191	-0.019404178	-0.025007734	0.018824586	0.012525252
FBgn0015790	0.559465542	0.299554842	0.202005944	0.43784851
FBgn0011674	0.099894195	0.052817179	0.031769449	0.093626125
FBgn0001202	0.058736631	0.028154368	0.016196116	0.040177108
FBgn0040679	-0.006215936	0.006021893	-0.015646416	-0.008872551
FBgn0039160	0.111492509	0.09582897	0.026996343	0.132223319
FBgn0265102	0.000286396	0.001388715	-0.000483239	0.003689662
FBgn0250785	0.373792032	0.214840557	0.168172298	0.362051618
FBgn0085203	-0.011996818	-0.010552566	0.013278796	-0.013899078
FBgn0086704	0.084706931	0.033448257	0.018704249	0.049825856
FBgn0031633	0.121468254	0.07156399	0.096796514	0.186525564
FBgn0010894	0.222286379	0.076413531	0.164804311	0.213681111
FBgn0034270	0.024786123	0.039992135	0.004770085	0.053785082
FBgn0040871	-0.003856249	0.001779791	-0.004787959	-0.003845264
FBgn0031091	-0.008966374	0.022620327	-0.01558364	-0.000723031
FBgn0037922	-0.002272563	-0.00603497	-0.005961803	-0.020034842
FBgn0284255	0.370518321	0.18002158	0.226076652	0.350224578
FBgn0286071	0.419781283	0.29673597	0.228352473	0.472866268
FBgn0035481	-0.009134016	-0.000812632	-0.012334767	-0.006141693
FBgn0038369	0.138026289	0.091917858	0.078163426	0.201576765
FBgn0029693	0.06146089	0.068015644	0.033273298	0.093932638
FBgn0032218	0.151094836	0.065591013	0.056535326	0.122628193
FBgn0003062	-0.456912694	-0.228239844	0.013091701	-0.224013565
FBgn0033104	0.041232671	0.006772405	0.053051791	0.057903852
FBgn0003969	0.288415266	0.179251788	0.105330175	0.270788868
FBgn0033226	0.204256655	0.127532936	0.040283291	0.148428628
FBgn0050421	-0.008048923	0.020982192	-0.010260594	0.024958322
FBgn0263197	0.41517718	0.25058953	0.160236808	0.428872528
FBgn0052843	0.007809949	0.008852541	0.010230314	0.009994117
FBgn0035789	-0.094023436	-0.028551044	-0.086681115	-0.101968651
FBgn0050088	0.052799191	0.0162547	0.017003944	0.012753545
FBgn0036335	-0.067971843	-0.023560338	0.089957065	0.086949608
FBgn0040271	0.07604814	0.086486509	0.091536659	0.153291837
FBgn0036364	0.053785155	0.012212349	0.033887306	0.034706726
FBgn0039690	-0.004989115	-0.006115271	0.030822005	0.053182211
FBgn0031536	0.085228137	0.029741428	0.05030651	0.069155599
FBgn0027793	-0.018174598	-0.003647602	-6.03E-06	-0.013454921
FBgn0036396	-0.023807903	0.000944859	-0.01396877	-0.007154193
FBgn0011770	-0.106016459	-0.109945331	-0.111421185	-0.334558648
FBgn0032376	-0.003854442	0.006131005	-0.010077634	-0.003361788
FBgn0030400	0.4192746	0.191256245	0.204841164	0.387152118
FBgn0037276	-0.002141861	-0.004714828	-0.000649948	-0.008001857
FBgn0050443	-0.020114706	-0.00264576	-0.010289321	-0.021320302
FBgn0034145	0.001781297	0.010098749	-0.010076961	0.001644322
FBgn0010441	0.275659457	0.115185234	0.137665225	0.224327497
FBgn0042213	0.025900273	0.006058581	0.015405034	-0.009030818
FBgn0000318	0.634994954	0.26333941	0.235985747	0.52425197
FBgn0038183	-0.110596748	-0.069513788	0.059397138	0.002523849
FBgn0265760	0.087144044	0.0412885	0.04278148	0.07277755
FBgn0041588	0.002280349	-0.002007117	0.072133451	0.050639571
FBgn0266670	0.060565937	0.023504246	0.036340533	0.094901982
FBgn0038313	-0.015181196	0.008773483	0.031906007	0.065623236
FBgn0259243	0.504315101	0.246516233	0.238398583	0.476217839
FBgn0027948	0.256070961	0.128873144	0.122479438	0.293987656
FBgn0267795	0.360231999	0.106271316	0.249595556	0.336876867
FBgn0039855	0.002740391	0.003366744	-0.003216309	0.001149299
FBgn0035049	0.582495672	0.435477063	0.313254345	0.773691627
FBgn0015776	0.193710121	0.093022654	0.067745754	0.109469129
FBgn0002121	0.229428708	0.158715014	0.140428701	0.285118878
FBgn0036005	-0.008770912	0.010509804	0.02648319	0.047693411
FBgn0010340	0.061697285	0.035451441	0.065378334	0.116651781
FBgn0003517	-0.25975819	-0.153526326	-0.054685913	-0.227220447
FBgn0053506	-0.013845838	-0.015966162	0.015232601	0.007623019
FBgn0041713	-0.011887484	-0.00782994	-0.00277875	-0.008182945
FBgn0032026	0.08012996	0.054482824	-0.029847765	0.016239544
FBgn0036987	0.004061433	0.011936515	-0.000444111	0.013639687
FBgn0037442	0.089548006	0.092646808	-0.005513303	0.11609157
FBgn0030976	0.18281835	0.062175382	0.075012967	0.147215731
FBgn0037815	-0.054320267	-0.01833974	0.02425684	0.005620267
FBgn0038466	0.017132726	0.004468103	0.00576419	0.017032523
FBgn0030362	-0.167114373	-0.242340795	-0.10757352	-0.391127471
FBgn0031458	0.075054461	0.045262329	0.058013402	0.11342069
FBgn0038603	0.001921892	-0.013546706	-0.005947724	-0.025454647
FBgn0083983	-0.046524711	-0.047052563	0.08600213	0.00906037
FBgn0039113	0.303381842	0.110288816	0.193644419	0.280821002
FBgn0033548	-0.330024912	-0.235823144	0.196539789	-0.058519109
FBgn0010877	0.02908375	0.120980617	-0.008430231	0.098645695
FBgn0039836	0.004894488	0.005472548	0.010080816	0.010090257
FBgn0042112	-0.134598943	-0.058563576	0.057891012	0.017215855
FBgn0051007	-0.002962415	0.008150518	-0.014715994	-0.005505772
FBgn0028509	0.03954874	0.018035191	0.024096915	0.036831683
FBgn0030234	-0.256146225	-0.117203194	-0.011712222	-0.134217404
FBgn0263088	0.026916665	0.020806812	0.001039752	0.019039487
FBgn0016693	0.515567759	0.171860542	0.205175076	0.385969067
FBgn0039347	0.006754153	0.00602081	-0.000563038	0.005678373
FBgn0033550	0.006422551	0.016139124	0.031038505	0.067242328
FBgn0003475	0.135019018	0.085897468	0.093818411	0.154564361
FBgn0266889	-0.00064194	0.00154037	-0.009705038	-0.016150424
FBgn0051144	0.001190096	0.002781538	-0.000526457	0.000686652
FBgn0250826	-0.00277432	0.013192606	-0.017234223	-0.004611809
FBgn0030008	-0.001161997	0.011925757	-0.011895163	-0.004993263
FBgn0014906	0.252234976	0.117070958	0.120700897	0.190376984
FBgn0003525	-0.46486244	-0.217694788	-0.145207048	-0.371856745
FBgn0266860	-0.006308531	0.010095127	0.01175571	0.029428593
FBgn0037364	-0.009774693	-0.006618927	0.000317291	0.010105248
FBgn0011672	0.209313124	0.168015398	0.042245871	0.230131365
FBgn0038100	0.201859157	0.089250322	0.108855508	0.160058504
FBgn0022224	-0.03445057	-0.027304568	0.080286268	0.051633111
FBgn0259715	-0.122769496	-0.051927296	-0.176952769	-0.240852214
FBgn0026059	0.042257047	-0.006708492	0.054072698	0.026712926
FBgn0038361	-0.010415146	0.008133546	-0.019032862	-0.004814962
FBgn0033903	-0.011174447	-0.007379971	0.001838753	-0.00467168
FBgn0032290	0.032694725	0.022914898	0.037135987	0.072230326
FBgn0029870	-0.013975518	0.02545087	0.022104499	0.040718375
FBgn0038286	0.033515227	-0.052338856	0.033454058	-0.022481847
FBgn0051361	-0.068563935	0.038108774	-0.052359101	-0.000140933
FBgn0267350	0.128448717	0.081057553	0.044962341	0.150303666
FBgn0030955	0.37212317	0.170615502	0.177799555	0.337099613
FBgn0031331	-0.000638543	0.009247969	-0.00725264	0.001998795
FBgn0034400	0.067114108	0.051847555	0.011614102	0.060250255
FBgn0011824	-0.367025055	-0.207149347	0.024921206	-0.208407029
FBgn0026196	-0.425276499	-0.234194739	0.058982087	-0.266023841
FBgn0053100	0.514027157	0.253781024	0.199536167	0.412140036
FBgn0020545	-0.005568479	-0.003548045	0.079811959	0.129735317
FBgn0023511	0.033195178	-0.006759786	0.031894116	-0.026743091
FBgn0031395	0.30191031	0.200890881	0.076960519	0.264800179
FBgn0032421	0.257291386	0.138262284	0.102259436	0.237341534
FBgn0004859	-0.047393933	0.002506695	-0.065157601	-0.071830414
FBgn0036299	0.137312866	0.038177734	0.095038883	0.127978429
FBgn0031069	0.275357561	0.157839747	0.198066839	0.37965082
FBgn0035090	-0.001115507	0.00181623	-0.003271261	0.000552109
FBgn0031560	0.120753913	0.131269047	0.079235988	0.198487505
FBgn0026620	0.384085163	0.165698357	0.191463578	0.328072524
FBgn0003231	0.215953141	0.120396988	0.099245908	0.224960814
FBgn0031413	-0.001542997	-0.004848113	0.001142307	0.010496488
FBgn0015801	0.295040617	0.091881155	0.098861861	0.244896615
FBgn0050285	0.003051488	0.003859227	0.009957081	0.023353189
FBgn0030778	0.113255662	0.048047815	0.040500459	0.091209166
FBgn0034915	-0.262616463	-0.133237604	0.125310853	-0.024206921
FBgn0038195	0.123901908	0.044486381	0.13046019	0.208072104
FBgn0085478	0.390352824	0.20446312	0.172621892	0.410453735
FBgn0030556	-0.017497379	-0.0060853	0.033853842	0.034479154
FBgn0052110	-0.009444375	-0.006013601	-1.83E-05	-0.006259139
FBgn0267033	-0.342386856	-0.170668825	-0.016628233	-0.185606436
FBgn0031909	0.009120712	0.03318378	-0.011365772	0.012397709
FBgn0031640	0.040670257	0.023914318	-0.010222799	0.021039997
FBgn0003275	-0.29380162	-0.126880299	0.009233241	-0.170003145
FBgn0030276	0.221321454	0.145282157	0.088750964	0.236080351
FBgn0029755	-0.152095945	-0.065860613	0.013637986	-0.075187968
FBgn0267733	0.021209751	0.062195807	-0.007686111	0.04965263
FBgn0051457	0.005587519	-0.000672683	0.004749063	-0.000342599
FBgn0035425	0.337270881	0.176778922	0.156003139	0.327520024
FBgn0015789	0.250064897	0.151129472	0.206329605	0.346877636
FBgn0262109	0.243645011	0.137539508	0.018855314	0.151925797
FBgn0265652	0.009967738	0.02511617	-0.018860905	0.009783599
FBgn0052594	0.381730185	0.238523225	0.131939632	0.377086077
FBgn0039304	0.452241015	0.258940275	0.195314493	0.438154494
FBgn0031312	-0.017121596	-0.004459684	0.102742862	0.116458982
FBgn0038583	0.016394616	0.020387242	0.010078341	0.025010141
FBgn0030482	-0.123083313	-0.046645601	-0.091128509	-0.115944602
FBgn0029121	0.315459176	0.201463703	0.133942887	0.334143882
FBgn0026320	0.098688222	0.032455337	0.077152593	0.134996069
FBgn0026738	0.047048305	0.037169064	0.06470405	0.076897958
FBgn0000150	-0.352268219	-0.292717732	-0.040160205	-0.357994797
FBgn0028480	0.59361176	0.382008156	0.239904591	0.599523225
FBgn0029736	0.174230224	0.101205544	0.095488809	0.240573582
FBgn0050091	0.037632423	0.02973794	0.003844629	0.045010271
FBgn0033090	0.001981782	-0.001312991	-0.00166682	-0.00028394
FBgn0259749	-0.057270694	-0.030344609	0.073294081	0.039250638
FBgn0260462	0.153335324	0.066260326	0.1199719	0.228367777
FBgn0038058	0.15063913	0.056454389	0.067429996	0.075722887
FBgn0016126	0.258168886	0.147532793	0.101794082	0.282724904
FBgn0013269	-0.461429832	-0.209737189	0.027807461	-0.178483707
FBgn0031126	0.017743197	0.01262868	0.068981298	0.101870948
FBgn0034802	-0.394878368	-0.341714736	-0.067811306	-0.369967208
FBgn0022023	-0.017186397	-0.044348951	0.164124807	0.115111282
FBgn0026369	0.23294058	0.111533396	0.0741966	0.169641462
FBgn0064766	0.086079574	0.059093196	0.028456098	0.059835464
FBgn0086254	-0.230011974	-0.201151506	0.031266257	-0.120767415
FBgn0063667	-0.095476853	-0.079465401	-0.08680174	-0.19413103
FBgn0050389	0.208688538	0.06161361	0.147652651	0.201516379
FBgn0046225	-0.003213667	0.008397982	-0.007947586	-0.002654879
FBgn0033686	-0.01956291	-0.006420041	-0.015195508	-0.024146811
FBgn0085279	0.174588646	0.048256629	0.205006828	0.21677232
FBgn0022893	-0.491049285	-0.270941266	-0.11161366	-0.370387304
FBgn0033717	0.395199054	0.232222656	0.205983043	0.419943877
FBgn0030982	4.15E-05	0.000719728	-0.002803031	-0.002773473
FBgn0086378	0.23839758	0.180896861	0.08263039	0.232920782
FBgn0032264	0.146760421	0.102014088	0.154996101	0.259965987
FBgn0023169	0.116230241	0.106190225	0.00090238	0.060305833
FBgn0285910	0.396293391	0.209862007	0.225866586	0.466343698
FBgn0264693	0.662982496	0.320621781	0.284610849	0.564597056
FBgn0011224	-0.116209491	-0.008041028	-0.105521813	-0.075550531
FBgn0035085	0.157011782	0.085800105	0.102754375	0.172829116
FBgn0033010	0.020144004	0.030970594	0.017024369	0.059777765
FBgn0036666	0.099192423	0.093230136	0.046867233	0.08445121
FBgn0003285	0.003900421	-0.001147849	0.000835169	-0.010225036
FBgn0027563	0.030031196	0.006407551	0.031906296	0.041296438
FBgn0000273	0.477732086	0.236866398	0.200273202	0.413407091
FBgn0000084	0.308193363	0.162276175	0.194365624	0.332047097
FBgn0039059	-0.008791456	0.000126851	-0.009648907	-0.010721067
FBgn0003401	-0.009061137	-0.006274459	0.010524993	-0.012823681
FBgn0250830	0.099426458	0.070614067	0.061294255	0.133283778
FBgn0278608	-0.234503334	-0.080518323	0.015652362	-0.124754958
FBgn0029088	0.151418297	0.08515521	0.052999321	0.142452421
FBgn0037956	0.37341401	0.166855649	0.225463814	0.389214144
FBgn0035323	0.043356993	0.013682994	0.061859043	0.076941301
FBgn0029819	0.091505431	0.034627339	0.000494065	0.133321867
FBgn0036643	0.408506667	0.209748019	0.167893135	0.390636352
FBgn0038475	-0.02554044	-0.023109748	-0.010333367	-0.030142504
FBgn0036566	0.193644569	0.138426455	0.002915728	0.154424411
FBgn0085423	0.272477443	0.146326122	0.139780581	0.30612029
FBgn0004957	0.032686084	0.018493858	0.017098449	0.004114206
FBgn0033926	0.696351209	0.202973242	0.354770058	0.542207698
FBgn0038046	0.011099416	0.02395924	0.05177954	0.101159959
FBgn0030519	0.356738424	0.205804459	0.207894183	0.386212738
FBgn0002526	-0.444782712	-0.262155911	-0.093994651	-0.329437694
FBgn0267488	0.34100141	0.153054612	0.161640165	0.302866973
FBgn0051151	-0.042235597	0.010874152	0.043557987	0.044353945
FBgn0045842	0.306857736	0.163846835	0.163158479	0.303208459
FBgn0264694	0.342918703	0.172571819	0.266505703	0.474791105
FBgn0031947	-0.083772933	-0.039153705	0.012698911	-0.025119654
FBgn0042177	-0.037192421	-0.013017233	-0.008851217	-0.058251583
FBgn0030864	-0.064654227	-0.036048199	-0.016981996	-0.060015085
FBgn0027929	-0.220611911	-0.08987599	-0.179164922	-0.26127234
FBgn0034304	0.078777948	0.042468878	0.043267551	0.089043667
FBgn0003480	0.001320906	-0.003843002	0.004372539	0.004273406
FBgn0027597	0.111136231	0.056626824	0.006960146	0.052255651
FBgn0250732	-0.050080824	-0.034631986	0.000409194	-0.051042234
FBgn0265186	-0.009556083	0.000652582	-0.006025482	-0.031179429
FBgn0022288	-0.112703983	-0.088675174	0.123424012	0.085055694
FBgn0039156	0.10390602	0.061124181	0.107780413	0.185861485
FBgn0039175	-0.084153191	-0.01798528	0.091770533	0.005628549
FBgn0261477	0.318476601	0.183148632	0.153842839	0.371047658
FBgn0020909	-0.030843691	-0.021893451	0.011002786	0.007339628
FBgn0027335	0.393078708	0.129467456	0.125463291	0.263640036
FBgn0003371	0.547802876	0.271340267	0.220687973	0.538400252
FBgn0033948	-0.017190007	-0.014957066	0.007412389	-0.002206668
FBgn0036671	0.062682675	0.033347783	0.058286057	0.075500867
FBgn0264950	0.004552341	0.001350506	0.006852256	0.010665811
FBgn0033020	0.00711865	0.018879755	-0.02146863	0.005831892
FBgn0085224	-0.026093808	-0.019069887	0.014078715	-0.014838722
FBgn0033816	-0.018339691	-0.014379941	0.053092705	0.017538132
FBgn0039356	-0.028505497	-0.017267836	-0.025841593	-0.038796073
FBgn0265042	0.153661614	0.067255995	0.108713633	0.19045228
FBgn0033644	0.018566879	0.012237243	0.009868316	0.022308836
FBgn0010043	-0.046862667	-0.045481862	0.010269395	-0.034496554
FBgn0034532	0.008458173	0.005971459	-0.000453512	0.002941713
FBgn0263841	-0.001721687	0.003582932	-0.004663593	-0.000345126
FBgn0051961	0.240296436	0.175964645	0.093508301	0.275817541
FBgn0037680	0.183805947	0.095268575	0.081167559	0.168240224
FBgn0261797	0.109109839	0.073399324	0.047066577	0.092749152
FBgn0037619	0.005872263	0.001062236	0.007889396	0.002375623
FBgn0033844	0.000501058	0.01876902	-0.003264605	0.081387765
FBgn0040973	0.001297027	0.005299813	-0.002449656	0.003246975
FBgn0031910	0.042114435	0.001309041	0.01609415	0.023891422
FBgn0038419	0.059465748	0.047769218	0.007321575	0.048668537
FBgn0259483	0.193393681	0.115844755	0.060075705	0.122103167
FBgn0033195	-0.012644543	-0.002070549	0.006442117	-0.011312793
FBgn0029672	-0.064025614	-0.0136977	0.00389064	-0.019313521
FBgn0041180	0.327140451	0.13818323	0.242041002	0.410952882
FBgn0000279	0.820839632	0.595667451	0.494653855	1.059214438
FBgn0031688	-0.015649767	0.000193375	0.000273483	0.008415785
FBgn0259734	0.109076217	0.068818868	0.029816927	0.077864481
FBgn0032750	-0.007496459	0.001752051	-0.003465478	0.001337893
FBgn0000278	0.07798964	0.084817125	0.113004688	0.186059257
FBgn0028970	0.147734888	0.091211185	0.092295225	0.15680774
FBgn0032224	0.012407524	0.006215857	-0.012623585	-0.006352818
FBgn0266708	0.005777037	0.006565348	-0.001312314	-0.001331658
FBgn0032704	0.372523333	0.099310061	0.189719857	0.25712656
FBgn0029853	0.001064501	0.014557852	-0.004005911	0.001084676
FBgn0033907	-0.050914644	-0.019643572	0.119844379	0.038288462
FBgn0285926	0.432381372	0.170022277	0.195118323	0.343463304
FBgn0259683	-0.024360533	-0.007313216	-0.002941846	0.018011051
FBgn0038455	0.16770001	0.121106897	0.0330961	0.156252309
FBgn0051111	-0.026372864	-0.010472293	0.010202742	0.005775584
FBgn0051029	0.018793866	0.021260649	0.009230418	0.030890245
FBgn0266667	0.076597056	0.023252799	0.035308874	0.062630512
FBgn0001291	0.37202993	0.140218926	0.233316346	0.348900729
FBgn0053113	0.294678517	0.045050722	0.223579049	0.231215478
FBgn0001222	0.064007352	0.020614508	0.063843086	0.139252317
FBgn0050090	0.380539863	0.240534748	0.083020456	0.318601501
FBgn0034117	-0.021583238	-0.011962081	-0.004993598	0.004016963
FBgn0036145	0.009896066	-0.002599798	-0.018533157	-0.010831816
FBgn0035977	0.001107043	-0.018952455	0.019270917	0.003249909
FBgn0003392	0.238338907	0.133400327	0.134313499	0.249328616
FBgn0038953	0.018485945	0.018549569	0.005207113	0.005143998
FBgn0038420	0.012081104	0.005102331	0.006368415	0.005828916
FBgn0261545	0.49870272	0.227507023	0.198868406	0.443952085
FBgn0010238	0.355668732	0.168636049	0.245155444	0.419121594
FBgn0019661	-0.124355714	-0.071014126	-0.021554955	-0.070314126
FBgn0035542	0.10321449	0.021824555	0.068354988	0.104784562
FBgn0051715	0.283325217	0.184537686	0.132153315	0.346333975
FBgn0030340	0.107041232	0.079496054	0.087966155	0.179469393
FBgn0263659	-0.190002111	-0.061693065	-0.079364259	-0.096547192
FBgn0283500	0.036698526	0.047482773	-0.022433003	0.009863156
FBgn0011592	-0.002062474	0.007099185	0.004365527	-0.01135081
FBgn0038964	-0.396300095	-0.173948798	0.053149222	-0.206067867
FBgn0051092	0.207650316	0.127706337	0.055677118	0.229154959
FBgn0035237	0.188061002	0.075643094	0.10320843	0.159333239
FBgn0034200	0.33523742	0.201660207	0.131802379	0.348169395
FBgn0040345	7.62E-05	0.004166794	-0.004874317	2.13E-05
FBgn0033868	-0.000527529	0.042910863	-0.037088244	0.004286744
FBgn0031261	-0.393941801	-0.236980786	-0.159482603	-0.40890549
FBgn0034139	-0.219854378	0.021968833	-0.153825816	-0.094080469
FBgn0032292	0.06760865	0.085265351	0.106010902	0.177090852
FBgn0031453	-0.366976703	-0.271567815	-0.008365385	-0.246397429
FBgn0031547	0.692243095	0.369180072	0.325882066	0.725941416
FBgn0031914	-0.189260751	-0.131134897	-0.151270286	-0.266648182
FBgn0038809	0.296226209	0.158872908	0.046884684	0.169566593
FBgn0029689	0.021362985	0.022167922	0.031207379	0.090550456
FBgn0030061	-0.148331423	-0.048192477	0.031620133	-0.037832863
FBgn0030365	-0.06871794	-0.048012438	0.028204928	-0.026061223
FBgn0266124	0.253065408	0.185657542	0.152907422	0.313559471
FBgn0000711	0.381309496	0.20676731	0.259343214	0.434987345
FBgn0037848	0.276350513	0.165493169	0.107886143	0.300386753
FBgn0031675	-0.007715296	-0.005981064	-0.001742579	-0.001589139
FBgn0034105	-0.003237321	-0.002800616	-0.000828102	-0.000806542
FBgn0011771	0.278057657	0.175537065	0.121930227	0.290386688
FBgn0004369	0.044718182	0.019482216	0.042132385	0.072184841
FBgn0032172	-0.006688174	0.019518602	0.040212881	0.101969354
FBgn0015522	0.319245799	0.116332313	0.175049143	0.252930738
FBgn0052438	-0.064329265	-0.024402165	-0.01196675	-0.024029636
FBgn0260768	-0.059409673	-0.024965636	0.047682142	-0.003679383
FBgn0062440	0.25977312	0.154624305	0.09916431	0.301523335
FBgn0263258	-0.001473654	-0.002755253	0.013822962	0.008996212
FBgn0030958	0.167461729	0.0856328	0.05623397	0.144078024
FBgn0011722	-0.438619413	-0.303220989	-0.194290088	-0.572873858
FBgn0032946	-0.134789386	-0.12712761	-0.039117338	-0.131742998
FBgn0029084	-0.003787445	0.000234248	0.004762561	0.007091849
FBgn0030659	-0.032476341	-0.030156713	0.025718698	-0.0303895
FBgn0034577	0.181660781	0.12798852	0.152694391	0.2440797
FBgn0053459	-0.114056317	-0.07057136	-0.024572173	-0.101148523
FBgn0025866	0.037220715	-0.018280375	-0.007244546	0.008231917
FBgn0051710	0.233375414	0.123112588	0.169306339	0.289957683
FBgn0261393	0.001832155	0.003603698	-0.002872967	-0.002711477
FBgn0030242	0.001949731	0.017434598	-0.017902844	-0.002474167
FBgn0035608	0.015753574	0.018229498	0.003502387	0.017871333
FBgn0034583	0.335450612	0.149263918	0.093767564	0.295685244
FBgn0267815	0.009113412	-0.005144541	0.01820478	0.014538626
FBgn0028523	0.06836745	0.055690466	-0.04991323	-0.044529361
FBgn0037207	0.213978763	0.102797749	0.115955104	0.235203041
FBgn0031403	0.005133024	-0.011857708	0.032552052	0.042256893
FBgn0010215	0.22896296	0.138106337	0.106680911	0.26153851
FBgn0033348	-0.020356406	-0.012663141	-0.001434073	-0.015251629
FBgn0027598	-0.261426549	-0.193764889	-0.020712504	-0.217334514
FBgn0058354	0.003421364	-0.000109476	0.003618988	0.002299888
FBgn0037293	0.220146228	0.128227489	0.125501178	0.263326731
FBgn0013720	0.174889702	0.058491516	0.098747678	0.140755019
FBgn0264542	0.050308699	0.017585759	0.05800858	0.05763971
FBgn0037560	0.057770319	0.030152468	0.019653275	0.066139309
FBgn0037261	0.263709695	0.184993456	0.115533736	0.304553047
FBgn0032530	-0.002729888	0.011006924	0.001409055	0.01239109
FBgn0034049	0.036541537	0.038274763	0.009523402	0.049135319
FBgn0032208	0.251825591	0.140868583	0.124389997	0.219876833
FBgn0051145	0.165408143	0.088782859	0.054522452	0.121763209
FBgn0004436	0.269279723	0.14129095	0.131420867	0.351780482
FBgn0010288	0.287544241	0.129482586	0.134313567	0.222610093
FBgn0052521	0.126119721	0.037079812	0.059751969	0.118152341
FBgn0037829	-0.004507334	-0.0018512	-0.002780974	-0.006542381
FBgn0030030	-0.009803811	-0.012667125	0.028019316	0.00565811
FBgn0261989	-0.32232435	-0.195718104	-0.285801045	-0.434492548
FBgn0014869	0.515908467	0.188456125	0.271472635	0.499709238
FBgn0051759	-0.033411248	-0.028574311	0.014182014	-0.025771956
FBgn0038039	0.10986359	0.102406536	-0.034497099	0.065787399
FBgn0031998	-0.015365562	0.002562547	-0.025493253	-0.023914266
FBgn0038855	-0.012754526	-0.027924287	0.024121546	-0.004704446
FBgn0000412	-0.414691438	-0.241347533	-0.037636363	-0.342337485
FBgn0031356	-0.049682176	-0.017462892	-0.048748159	-0.101909464
FBgn0029526	-0.004469989	0.004770528	-0.010024384	-0.006456887
FBgn0001308	0.418066049	0.300761415	0.170516591	0.458615155
FBgn0013263	-0.033425982	-0.003375486	0.039451649	0.028856386
FBgn0030969	-0.00488504	-0.008288418	0.026756535	0.039698901
FBgn0037915	-0.006165572	0.002842854	-0.011892182	-0.012157395
FBgn0032213	0.003138281	-0.059492628	0.073357687	-0.00119429
FBgn0004648	0.03224278	0.024849772	0.010831911	0.06483868
FBgn0030328	0.391031007	0.14806184	0.203950171	0.364215286
FBgn0029986	0.005047756	0.004425364	-0.003353626	0.00457334
FBgn0042094	-0.099393968	-0.034649288	-0.074742681	-0.115073353
FBgn0033912	-0.245887117	-0.150991896	-0.055563049	-0.206052743
FBgn0043457	-0.032673761	-0.021313786	0.030256596	-0.021129832
FBgn0039902	0.140598879	0.090626225	0.059550257	0.100720382
FBgn0015270	-0.027590128	0.002677792	-0.010215261	-0.018410069
FBgn0037138	0.046699619	0.035312146	0.037293661	0.062191082
FBgn0262515	0.224319728	0.05505581	0.248182049	0.336982918
FBgn0030673	-0.022449722	-0.020823017	0.004484313	-0.024098163
FBgn0033934	-0.00517204	0.030842335	0.031064712	0.045906314
FBgn0032780	0.02695983	0.007389608	0.01092673	0.022850418
FBgn0031420	0.026439004	0.037448319	-0.015020777	0.016900751
FBgn0012034	0.203982415	0.11212997	0.094791885	0.18657801
FBgn0028684	0.088090255	0.058408441	0.065819911	0.151342021
FBgn0036921	0.325961077	0.05311102	0.267506804	0.321731802
FBgn0250837	-0.379850919	-0.159529678	-0.008677496	-0.199445776
FBgn0260655	0.005285604	0.015278707	-0.035134646	-0.01074058
FBgn0034753	-0.375301809	-0.263671287	-0.086516802	-0.313414083
FBgn0035151	-0.008461686	-0.002094722	-0.003614295	-0.001919084
FBgn0032444	0.332897146	0.155585192	0.218895387	0.340408937
FBgn0053977	0.288524324	0.127143477	0.126173682	0.244981656
FBgn0030341	0.079796358	0.039958473	0.094300204	0.164415102
FBgn0031985	0.080527085	0.082454235	0.012473869	0.093796708
FBgn0034027	0.00675177	-0.004177269	0.004160147	0.011788153
FBgn0039561	0.143430494	0.058239537	0.062454129	0.126178739
FBgn0031378	-0.00673794	-0.002189991	-0.006282994	-0.01340717
FBgn0038853	0.054263449	0.052719569	0.025479612	0.07278411
FBgn0261836	-0.290724026	-0.297001206	0.00153063	-0.26097522
FBgn0037240	0.21392095	0.106379447	0.180462074	0.296744728
FBgn0033551	0.143291721	0.080492167	0.085724185	0.166482123
FBgn0262142	0.003986564	-0.007755136	0.064628956	0.05367086
FBgn0020238	0.27131684	0.061571972	0.163124982	0.213767341
FBgn0034964	0.008773643	0.027155062	-0.005462653	0.02079278
FBgn0010173	-0.137277315	-0.07284663	0.030161728	-0.01498016
FBgn0043012	0.297433659	0.164588736	0.142153413	0.278123833
FBgn0038872	-0.016272263	0.019291742	0.00615259	0.029755962
FBgn0034243	-0.058179089	-0.012597237	0.004051192	-0.014186901
FBgn0031868	-0.036879497	-0.002945951	-0.01071017	-0.007614124
FBgn0019972	0.03319372	0.016151916	0.029973898	0.069866599
FBgn0038065	0.240994873	0.04133623	0.262539227	0.337370178
FBgn0263510	-0.140872404	-0.073446472	0.076432033	0.002850747
FBgn0054015	0.025516785	0.009361208	0.044988892	0.023636374
FBgn0053704	-0.006555695	0.002144872	-0.009414236	-0.004393868
FBgn0052109	-0.007091895	-0.016227919	0.03623147	0.011754725
FBgn0035213	-0.049401986	-0.041642511	0.045051007	-0.005910061
FBgn0086676	0.170961458	0.150001229	0.033551737	0.189507811
FBgn0028983	0.219909587	0.122489251	0.085489547	0.186983846
FBgn0036118	0.024286637	0.021394019	0.032082513	0.065890877
FBgn0016984	0.056384825	0.042195479	0.051450818	0.07723974
FBgn0029529	0.056330018	0.020989125	0.083562817	0.117326402
FBgn0033891	0.050868207	0.0274606	0.012084935	0.07416528
FBgn0036306	0.004111519	0.006478556	0.039730306	0.048930111
FBgn0011289	0.021310635	-0.002286032	0.042543308	-0.00214238
FBgn0010314	-0.128421237	-0.027767073	-0.085525593	-0.111924668
FBgn0038428	0.292290861	0.179917594	0.082487099	0.259629321
FBgn0010434	0.37226562	0.146859828	0.176459864	0.381422645
FBgn0037022	0.024648109	0.020669945	0.006054959	0.030048325
FBgn0004647	-0.410154329	-0.249959703	-0.109753083	-0.327544487
FBgn0019828	-0.011932672	0.004894575	-0.016105502	-0.012657364
FBgn0085736	0.090380745	0.047690584	0.053543476	0.106404223
FBgn0260720	0.010137341	0.004412623	0.011261605	0.016663915
FBgn0029750	-0.000279269	0.009941194	-0.015446326	-0.004213484
FBgn0002466	-0.104881123	-0.003877944	-0.041909148	-0.061397843
FBgn0029502	0.037093092	0.03221362	0.05837703	0.094661689
FBgn0032256	-0.017771251	-0.00770387	0.009844887	-0.018069438
FBgn0086346	0.135916467	0.029909948	0.081481713	0.083051309
FBgn0028526	0.079283393	0.034548527	0.054458414	0.084266868
FBgn0024754	0.198878681	0.045420304	0.200058163	0.272679941
FBgn0265598	-0.000255623	0.002675912	-6.36E-05	0.003992541
FBgn0028848	-0.002111621	0.006129011	-0.009348087	-0.002990777
FBgn0267849	0.41448179	0.180707954	0.174009436	0.310065754
FBgn0036121	-0.308246728	-0.193800634	-0.142946432	-0.341514277
FBgn0036125	0.004716299	0.008568597	-0.005715941	0.005797987
FBgn0262601	-0.408044448	-0.195157945	0.029846517	-0.189139873
FBgn0022359	-0.34591223	-0.214810951	-0.020569737	-0.252684255
FBgn0036686	-0.12787648	-0.045173066	-0.009317644	-0.061770046
FBgn0037702	0.338646654	0.216542257	0.106940584	0.332139992
FBgn0267390	0.202778302	0.099977574	0.09286828	0.195718152
FBgn0286070	0.007430556	0.028731409	0.000685367	0.017940575
FBgn0000277	0.18769694	0.132148992	0.262331284	0.390312862
FBgn0029147	-0.364771922	-0.272048664	-0.162983908	-0.479093357
FBgn0262166	-0.011607319	0.003884327	-0.013439042	0.003691468
FBgn0033392	0.005391973	0.008563704	0.005180505	0.004737123
FBgn0036258	0.055756215	-0.015498551	0.133069434	0.065318439
FBgn0035173	0.080081701	0.005060954	0.105057854	0.10840145
FBgn0030915	-0.015307334	-0.005619144	0.017259855	0.01868448
FBgn0266377	0.29579257	0.178861132	0.169427987	0.312507314
FBgn0034186	-3.08E-05	0.016635543	0.011098925	0.003091464
FBgn0028663	0.401888401	0.126952958	0.192977996	0.316130112
FBgn0028331	-0.224314938	-0.146376979	-0.13828398	-0.260013819
FBgn0011704	-0.136479785	-0.040432393	-0.00448594	-0.040875331
FBgn0051278	-0.00850157	-0.004019458	0.036546322	0.032603211
FBgn0003977	-0.01881472	-0.018262767	0.004381399	0.000185283
FBgn0044510	0.039076978	0.031671878	0.072602103	0.085638325
FBgn0037065	0.02694455	0.018429027	0.019567343	0.025812216
FBgn0065110	-0.027585545	-0.01543005	-0.008049774	-0.012653028
FBgn0027503	-0.007059077	-0.006043787	-0.003917024	-0.018815044
FBgn0028938	-0.003788471	0.003719709	-0.017143065	-0.010469713
FBgn0030675	0.007738581	0.022446175	-7.79E-05	0.020300486
FBgn0267726	0.018726503	0.062125433	-0.02052478	0.028037852
FBgn0265003	0.093122856	0.041442731	0.083916914	0.106838938
FBgn0037561	-0.048018082	-0.019152117	-0.002728225	-0.042724913
FBgn0263598	0.443542488	0.180389835	0.206422916	0.326391686
FBgn0260748	0.125006012	0.141767169	0.05050517	0.180724217
FBgn0037468	0.37134692	0.184247602	0.215986675	0.417447786
FBgn0043783	0.008882057	0.006116851	0.005904249	0.017108923
FBgn0032935	0.189634036	0.101821889	0.088995011	0.221527812
FBgn0038332	0.004979956	0.012189621	0.006462299	0.006942012
FBgn0039466	0.167880235	0.050551059	0.104708634	0.141222694
FBgn0038056	-0.019296834	-0.004711762	0.028839319	0.026531556
FBgn0028554	-0.279239282	-0.099615167	-0.020309081	-0.129776325
FBgn0038465	0.206629973	0.118046423	0.097017775	0.223956295
FBgn0011787	-0.202014613	-0.093407094	0.056502464	-0.035784454
FBgn0024329	0.113028374	0.093038094	-0.005137984	0.110248141
FBgn0010078	-0.232834031	-0.120535322	-0.027765431	-0.160078351
FBgn0035210	-0.027706609	-0.015128326	0.033925702	0.031808572
FBgn0031496	-0.000831974	0.005242401	-0.006032357	-0.000510777
FBgn0034091	0.315466233	0.133544835	0.12962488	0.25141377
FBgn0033880	0.051283393	0.144562488	0.042144615	0.162173937
FBgn0030452	-0.039501769	-0.019641911	-0.030711861	-0.073505902
FBgn0086446	0.072002405	0.038506818	0.061810567	0.095953883
FBgn0031708	0.068248866	0.03541361	0.08606798	0.126872013
FBgn0033153	-0.274085739	-0.13246609	-0.128223898	-0.250382541
FBgn0038808	-0.095302502	-0.06762971	0.095556072	0.054943498
FBgn0005655	-0.175630477	-0.002769425	0.044724819	0.077093299
FBgn0266421	-0.146642684	-0.080558322	0.026432577	-0.085366633
FBgn0011708	0.106229479	0.04151267	0.109005539	0.142215634
FBgn0032004	0.031449339	0.030442237	0.012716469	0.047527215
FBgn0011589	-0.041735281	-0.044377861	-0.024749151	-0.067623777
FBgn0032018	0.015741573	0.060277378	-0.054580904	-0.017681469
FBgn0260632	0.16436582	0.163763729	0.074442028	0.21008194
FBgn0022787	0.325341345	0.159738292	0.153843446	0.31266136
FBgn0027052	0.093440502	0.041601718	0.034697298	0.037437879
FBgn0040964	0.007597258	-0.006946333	0.01473376	-0.004072796
FBgn0037121	-0.08429495	-0.045464773	0.094025288	-0.009709662
FBgn0029824	0.026334033	0.009450505	0.056000653	0.056562541
FBgn0038516	0.353587925	0.213427908	0.092050582	0.303024103
FBgn0011747	0.476411983	0.23013735	0.188748583	0.393399017
FBgn0038396	0.040156438	0.037196577	0.041072695	0.075666193
FBgn0038619	-0.028825909	-0.008997714	0.006077583	-0.001425406
FBgn0033205	0.010308957	-0.015780439	0.04230116	0.030263655
FBgn0267828	0.180278218	0.081717437	0.044433844	0.133908513
FBgn0027552	0.118456904	-0.014147578	-0.010144856	-0.03172672
FBgn0034488	-0.001468888	0.015426733	-0.004211173	0.006453955
FBgn0024320	0.111841944	0.131594849	-0.053727407	0.086505732
FBgn0031832	-0.034345077	-0.025313715	0.032721593	0.033488662
FBgn0038582	-0.005488095	-0.018147942	0.017055286	0.019781968
FBgn0039025	0.173741128	0.115374926	0.054519517	0.160770645
FBgn0034307	-0.02510929	-0.018113896	0.017131433	-0.033414095
FBgn0262945	-0.110451274	-0.00194306	0.039569736	0.041442817
FBgn0028430	0.393367218	0.213359174	0.173063626	0.355109493
FBgn0015797	0.39699077	0.248628906	0.14500734	0.344323847
FBgn0026582	-0.000457531	0.007400209	0.008587402	0.026597861
FBgn0027504	0.106859271	0.074871262	0.019524003	0.092368094
FBgn0036180	0.087874702	0.088220022	0.040915937	0.16463291
FBgn0031497	-0.059755843	-0.033256705	0.149883061	0.112118062
FBgn0261800	-0.328823966	-0.216811736	-0.168871217	-0.386374015
FBgn0038674	0.001137466	0.002720961	-0.003567948	-0.008005651
FBgn0037933	0.045089049	0.004922324	0.018500796	0.020747697
FBgn0020633	-0.216430786	-0.065972595	-0.01457031	-0.154812012
FBgn0034392	0.127103902	0.113610354	-0.003912202	0.098350064
FBgn0020300	-0.002034629	0.004301887	-0.00345096	0.004019546
FBgn0030052	0.348561539	0.101426047	0.226666956	0.365415221
FBgn0030834	-0.036471838	0.000992346	-0.004974424	-0.033619468
FBgn0003607	-0.16914364	-0.078604129	0.10875058	0.011448597
FBgn0039155	0.154302513	0.08120011	0.10147872	0.176687435
FBgn0026393	0.014058408	0.009400389	-0.000518436	0.012681962
FBgn0030141	0.296267271	0.166249062	0.135982489	0.275731407
FBgn0000092	-0.001067495	-0.000560385	0.001129965	-0.00367989
FBgn0038053	-0.01498512	0.052772492	-0.129513603	-0.064935707
FBgn0010768	0.23726614	0.121990567	0.091685822	0.200750387
FBgn0031608	0.010727752	0.011214963	0.013225001	0.014475643
FBgn0022160	0.1790168	0.115042211	0.05627571	0.176803427
FBgn0263746	-0.030596365	-0.019108265	0.006376638	0.003842281
FBgn0036999	0.003850129	8.63E-05	0.031141315	0.010160368
FBgn0034849	-0.004507696	-0.037327035	0.043959878	0.043664621
FBgn0002733	-0.316650957	-0.226472365	-0.130503103	-0.320915963
FBgn0259227	0.028088567	0.035335917	0.014597228	0.047960142
FBgn0030878	-0.066704702	-0.036679017	0.074420784	-0.004820193
FBgn0011836	-0.038864852	-0.030353514	0.017723762	-0.019651582
FBgn0004865	-0.027712678	-0.019292246	-0.005578873	-0.006152649
FBgn0028542	-0.343491417	-0.308574925	-0.187373482	-0.517266397
FBgn0024365	0.183539372	0.161379791	-0.001801885	0.125233639
FBgn0086558	0.353971471	0.160942687	0.242558405	0.381287035
FBgn0050069	0.135725628	0.036902398	0.127483251	0.164480348
FBgn0029659	-0.00669503	0.011281671	0.009311856	0.026388595
FBgn0036266	0.002606387	0.008221372	0.01366842	0.031041488
FBgn0034097	0.001280512	0.013440034	-0.013543653	0.001417207
FBgn0038576	-0.016141402	-0.010521603	0.021954081	0.007784638
FBgn0029801	0.157873448	0.133525791	0.066769322	0.191241411
FBgn0035469	0.019681083	-0.010049449	0.099741129	0.066773165
FBgn0052068	0.097283838	0.006451205	0.067703913	0.040982494
FBgn0003008	-0.009134289	-0.039523432	0.036784332	-0.005843414
FBgn0036257	0.453330955	0.151645915	0.185661625	0.318257594
FBgn0032899	0.13791958	0.00237755	0.107031615	0.106639103
FBgn0260940	0.09375497	0.03811972	0.079005627	0.080158117
FBgn0033953	-0.007598359	0.006874244	-0.004693736	-0.014569463
FBgn0037146	-0.136129029	-0.015736324	-0.138107726	-0.158896032
FBgn0037923	0.006039146	0.006019469	-0.008034043	0.001562957
FBgn0033757	0.014102262	0.006825179	-0.006866196	-0.011240229
FBgn0034356	-0.008108188	0.00669581	-0.00616323	-0.007483223
FBgn0051224	-0.0797594	0.011632693	0.003800874	0.073373578
FBgn0033949	-0.247904657	-0.212381402	-0.23119035	-0.484819456
FBgn0031244	-0.021803051	-0.024397838	0.033884662	0.01582162
FBgn0027569	0.325405104	0.103875424	0.166445786	0.313072117
FBgn0024234	0.033550611	0.026765321	0.057543997	0.080493218
FBgn0028292	0.162648402	0.116670637	0.079545724	0.189281323
FBgn0033571	-0.128905003	-0.071425587	-0.005775373	-0.143424508
FBgn0036035	-0.108085744	-0.054599022	0.029542853	-0.020267535
FBgn0038585	-0.158087649	-0.093666922	0.0531746	-0.045184008
FBgn0031245	-0.083563181	-0.028838085	-0.049129707	-0.066496712
FBgn0086656	0.240659496	0.164459822	0.090136893	0.292581117
FBgn0030943	-0.136736506	-0.041753291	-0.036149598	-0.066844081
FBgn0014380	0.047451638	0.062017074	0.022161641	0.134409553
FBgn0283659	-0.015703962	0.003459641	-0.009976592	-0.001722074
FBgn0030851	-0.046757131	-0.042740371	0.035820225	0.01331612
FBgn0034231	-0.055741287	-0.008333712	-0.005548578	0.022757258
FBgn0031997	0.011399601	0.009586084	-0.010860689	0.023301372
FBgn0052817	0.014397121	0.003032019	-0.003063158	0.001062009
FBgn0004638	0.243658866	0.175403874	0.054601697	0.225351444
FBgn0023507	-0.008200303	0.001118744	-0.014039851	-0.00068641
FBgn0039856	0.001431214	0.006147411	-0.006061227	0.001348439
FBgn0034494	0.181099786	0.082698552	0.116151749	0.19415381
FBgn0001234	-0.099642393	-0.154100956	0.095331015	-0.07972401
FBgn0027783	-0.159903776	-0.100025594	0.00741996	-0.068421089
FBgn0054039	-0.017406732	-0.009349213	0.015235189	0.010263768
FBgn0053252	-0.009572592	0.006050264	-0.017805896	-0.012839307
FBgn0034483	-0.006947753	-0.001375498	-0.001317565	-0.001066747
FBgn0039467	0.370733887	0.176290729	0.275837527	0.423962545
FBgn0086442	0.114655453	0.113213401	0.024082911	0.116620307
FBgn0002566	0.105277623	0.068072322	0.036901591	0.075266685
FBgn0038504	0.074649991	0.136747127	-0.024144166	0.128591838
FBgn0259224	0.08285081	0.014974148	0.069587537	0.087120256
FBgn0035076	-0.405843866	-0.271709821	-0.196610056	-0.488760496
FBgn0051195	0.25387425	0.139774872	0.160098362	0.293799106
FBgn0038327	-0.005976781	-0.00431979	0.021713247	0.001768044
FBgn0043455	0.058307463	0.033154794	0.069949781	0.082131435
FBgn0052591	-0.00542542	0.006349586	-0.010897282	-0.002563792
FBgn0030529	0.368626276	0.103256755	0.252854483	0.372806031
FBgn0013983	0.129099335	0.024281419	-0.039458603	0.007915333
FBgn0035333	0.055377026	0.045171873	0.009605195	0.074333342
FBgn0028897	0.010470328	0.011762113	-0.004053762	0.003932915
FBgn0039226	0.233336826	0.096406753	0.11134796	0.201156632
FBgn0026872	-0.030551742	0.003714047	-0.003559565	-0.000463134
FBgn0031437	0.32041915	0.16369954	0.136983388	0.308852263
FBgn0046763	-0.038410667	-0.012724211	0.056203325	0.029345332
FBgn0032638	-0.027081218	0.200656412	0.061530334	0.224604936
FBgn0031059	0.068390207	0.009935597	0.052486802	0.047668296
FBgn0058191	0.057241273	0.021540601	0.066963052	0.123496438
FBgn0003189	-0.100224137	-0.065488473	0.012836466	-0.059038839
FBgn0037637	0.003874874	-0.026293811	0.069830237	0.029530613
FBgn0015777	0.040676491	0.031432644	-0.01288363	-0.00110799
FBgn0032194	-0.002665497	0.001196295	0.015089042	0.014981065
FBgn0034528	-0.12856813	-0.054025935	0.003249023	-0.071665902
FBgn0015527	-0.186291723	-0.094775699	0.028808879	-0.026457507
FBgn0264489	0.091497457	0.0208834	0.091168082	0.116287908
FBgn0005632	0.058977311	0.010394992	0.079833338	0.11311496
FBgn0039735	-0.39355085	-0.184216954	-0.009971687	-0.183145291
FBgn0262656	-0.331528945	-0.161287216	-0.01444103	-0.144462146
FBgn0035251	0.285367392	0.131621937	0.12335916	0.230916072
FBgn0035243	0.012961547	0.019197775	0.033471229	0.076640166
FBgn0034724	0.235270122	0.326332496	0.257945266	0.590460745
FBgn0039075	0.174278763	0.066451904	0.096703906	0.161480944
FBgn0036207	0.015121187	0.009658281	0.000266938	0.007853929
FBgn0036336	0.139468317	0.081123987	0.057085469	0.164528383
FBgn0015568	-0.014764729	-0.017147463	-0.024218859	-0.044541798
FBgn0014006	0.005735656	0.030243853	-7.55E-05	0.002621545
FBgn0278598	-0.014963402	-0.009732451	0.004372938	0.015621465
FBgn0050085	-0.069019509	-0.050688544	-0.006171098	-0.051938016
FBgn0015949	0.159351273	0.065926095	0.047584666	0.101818275
FBgn0028380	0.100514106	0.047370289	0.013582047	0.044611538
FBgn0033438	0.342248475	0.395890876	0.247276135	0.628805894
FBgn0034962	0.013719839	0.04352381	-0.013825964	0.032552235
FBgn0050447	-0.006982679	0.000984789	-0.005036274	-0.001799064
FBgn0261602	-0.218065981	-0.144116644	-0.009436284	-0.187572612
FBgn0053062	-0.007496669	-0.008988167	0.004166714	-0.007778725
FBgn0016081	0.264603552	0.137845265	0.145509158	0.273849168
FBgn0051849	0.040565778	0.037922222	0.006707457	0.049791339
FBgn0087011	0.012434485	0.004356421	-0.000712471	0.002521123
FBgn0263831	-0.006242572	0.001338987	0.001065235	-0.00330994
FBgn0038446	0.146644193	0.086294949	0.066744609	0.1919119
FBgn0035878	-0.125804366	-0.028039539	0.006524264	-0.017193478
FBgn0033755	0.163549805	0.069846609	0.114430104	0.170025792
FBgn0000709	0.038550188	0.026025736	0.021617929	0.071637266
FBgn0030680	-0.025520785	-0.014630917	-0.006645598	-0.010161083
FBgn0261862	0.004260524	-0.002915852	-0.033978562	-0.013101452
FBgn0002989	0.036783137	0.031369311	0.004305352	0.042192163
FBgn0051223	-0.032723827	-0.020464422	0.020234129	0.014235211
FBgn0039756	0.198203563	0.059972862	0.150613926	0.277526129
FBgn0040233	-0.012475507	-0.011788024	-0.001708612	-0.011165564
FBgn0000052	-0.079795821	-0.018718535	-0.025134354	-0.031779549
FBgn0086675	-0.040126632	-0.023929623	-0.028244779	-0.035325162
FBgn0022153	0.064865295	0.046135768	-0.001079141	0.012127448
FBgn0033272	0.145115754	0.069768421	0.046785265	0.093471298
FBgn0035335	-0.097140578	-0.071585367	0.086816153	0.033477368
FBgn0021764	0.022072111	0.027035743	0.031538644	0.068244476
FBgn0015296	0.311173558	0.181593932	0.164674524	0.346436138
FBgn0039869	0.279794703	0.082878493	0.218972096	0.304313174
FBgn0259710	0.017003003	0.006161182	0.021282645	0.028673596
FBgn0032401	-0.000713768	0.006052499	-0.009052167	-0.004493919
FBgn0030434	0.046143778	0.030281515	0.015202061	0.054204825
FBgn0035644	-0.015789591	-0.006213578	-0.006245782	-0.014875694
FBgn0037491	-0.014495488	-0.01934536	0.02391258	-0.04608266
FBgn0036096	-0.096481745	-0.051744883	0.024583434	0.021189227
FBgn0033725	-0.145261935	0.149400121	0.036986168	0.179634467
FBgn0038325	0.014003486	0.013178794	-0.003770228	-0.004861719
FBgn0038597	-0.096517851	-0.02975078	0.006850972	-0.060636032
FBgn0002921	0.413031921	0.16650765	0.192244939	0.367508609
FBgn0016034	0.004815384	0.005899163	0.025462678	0.039768498
FBgn0039731	0.008726772	0.016311646	0.001227418	0.006633968
FBgn0039051	-0.216897816	-0.150981695	-0.259835905	-0.558815257
FBgn0003274	-0.167553721	-0.111171461	-0.002621846	-0.119621946
FBgn0023095	0.021371064	0.012929273	0.013591391	0.018045886
FBgn0025574	0.025894001	0.098161829	-0.004162789	0.092608964
FBgn0033313	0.003971856	0.047723872	-0.065692628	-0.010547707
FBgn0085229	-0.259139619	-0.147027065	0.020961382	-0.081789511
FBgn0037044	0.211230073	0.124735146	0.077458519	0.175725498
FBgn0034658	0.002155992	0.012652483	-0.006484118	-7.12E-05
FBgn0034708	0.121869409	0.072755753	0.059057901	0.161820629
FBgn0027553	0.004230322	0.02308188	-0.019827897	-0.009233274
FBgn0260635	0.311061742	0.171829545	0.166221386	0.332482388
FBgn0034422	-0.075401075	-0.032200131	0.010987026	-0.036819796
FBgn0024432	0.059386757	0.123072127	0.066586254	0.176714988
FBgn0015295	0.07785173	0.049123112	0.055061997	0.154363065
FBgn0029524	0.049597821	0.009473637	0.035058497	0.026234689
FBgn0038320	0.375435784	0.207070776	0.180993712	0.408904776
FBgn0033069	-0.000684613	0.00316495	-0.003945873	-0.000812132
FBgn0035763	0.285845364	0.177203251	0.09820426	0.233521873
FBgn0033429	0.017365577	0.02524829	0.025009556	0.066111543
FBgn0030996	0.005509229	0.007873233	0.043623795	0.026140815
FBgn0050392	0.197022795	0.118866703	0.108994864	0.180798555
FBgn0035420	0.024048618	0.033295472	0.022242595	0.059635775
FBgn0033899	0.015771332	0.000449819	0.042778127	0.036162851
FBgn0034736	-0.047604304	0.034088318	-0.084271069	-0.05038396
FBgn0011638	-0.182318449	-0.075639487	0.05089751	-0.029683464
FBgn0035867	0.010031578	-0.003871096	0.003387426	0.006364727
FBgn0003278	-0.073147128	-0.031020465	0.029843732	0.008921138
FBgn0033127	0.058876522	0.005715018	0.087951502	0.098983709
FBgn0003545	-0.066869295	0.005758106	-0.040674501	-0.031313593
FBgn0264953	0.216239159	0.050994244	0.11462282	0.188643106
FBgn0038545	0.10181174	0.048580848	0.075759914	0.11904716
FBgn0051431	0.084670618	0.04493144	0.017617629	0.108758469
FBgn0032252	-0.028853479	-0.031968605	-0.00967596	-0.024832502
FBgn0027087	0.115647644	0.026110584	0.166655616	0.151840062
FBgn0039531	-0.006137539	-0.004954768	0.005000937	-0.005538234
FBgn0036117	-0.026062173	-0.026594669	-0.016941153	-0.053478274
FBgn0035541	-0.173278336	-0.107204161	-0.036713215	-0.085757074
FBgn0036825	-0.234381623	-0.148495135	-0.058364909	-0.200670124
FBgn0037920	-0.006559897	0.001082008	-0.003189065	-0.006892546
FBgn0016917	-0.409650074	-0.232234864	0.020714958	-0.223995452
FBgn0032779	0.009942492	0.007653395	0.011033946	0.027516161
FBgn0038471	-0.016877188	-0.001959623	0.054791774	0.071161036
FBgn0285937	0.413295676	0.2061054	0.204416453	0.407035213
FBgn0034614	-0.08899743	-0.047456222	0.051245546	0.00644497
FBgn0024992	0.019680169	-0.017144247	0.046734078	0.064024813
FBgn0032405	-0.14078606	-0.100708236	-0.154812787	-0.268366378
FBgn0036213	-0.2318895	-0.140052097	-0.012407056	-0.147577443
FBgn0033375	-0.013428653	-0.005043585	0.025931056	-0.025975054
FBgn0037943	-0.057422746	-0.036487373	0.019689665	-0.007845399
FBgn0024804	0.059779125	0.021002112	0.109223274	0.137032743
FBgn0040080	0.139170125	0.110726877	0.040143227	0.15728199
FBgn0032214	0.12007183	0.092159419	0.062760994	0.175363366
FBgn0003502	-0.175181165	-0.071820101	-0.149270665	-0.176372661
FBgn0040634	0.025046332	0.016230224	0.010542988	0.016257303
FBgn0034084	0.017624506	0.006579791	0.025478936	0.026682534
FBgn0038577	0.114235871	0.052788108	0.112485894	0.156544219
FBgn0034433	-0.038360482	0.004412951	-0.017594109	-0.002875915
FBgn0038989	-0.113004178	-0.074554295	0.076331697	0.042209856
FBgn0032702	0.134952213	0.07877872	0.099156056	0.163308883
FBgn0039449	-0.008032402	0.005526074	-0.005398606	0.010989378
FBgn0034398	-0.342655606	-0.244072599	-0.09282491	-0.287395753
FBgn0022344	-0.028465587	0.006169918	0.060882001	0.067183247
FBgn0035526	-0.015082356	-0.008266296	0.00641672	-0.006575715
FBgn0000244	0.018158626	0.010782455	0.00468978	0.024478095
FBgn0033507	-0.043339798	-0.009114198	0.009301544	0.008144654
FBgn0031724	0.0090521	0.009610712	0.000708546	0.016662391
FBgn0039634	0.022225424	0.044317042	-0.016773757	0.018936077
FBgn0033705	-0.008672743	0.00718845	-0.016009422	-0.009763968
FBgn0002638	-0.143030597	-0.018745438	-0.026328205	-0.009412907
FBgn0050496	-0.016398407	0.004921116	0.010512051	0.011984913
FBgn0039927	0.087766133	0.024456938	0.059115313	0.100899858
FBgn0037897	0.072650857	0.039912346	0.024628787	0.076251135
FBgn0034744	0.177709734	0.122646314	0.067873032	0.24556124
FBgn0027091	0.042582142	0.009991036	0.059540541	0.064038078
FBgn0263353	0.00061392	6.94E-05	0.000794669	-0.00172001
FBgn0037652	-0.029539294	0.021249156	0.064365678	0.060291698
FBgn0010621	0.358939031	0.153929983	0.190172094	0.315414348
FBgn0042185	0.132501372	0.117685059	-0.029683565	0.09850782
FBgn0035703	0.015976261	0.01173705	0.00822012	0.013120417
FBgn0011656	0.185459769	0.115471718	0.053609319	0.165252897
FBgn0031169	0.0021293	0.004923585	0.000733794	0.00250813
FBgn0083961	0.162461697	0.082402204	0.115205188	0.123477683
FBgn0036918	0.328035923	0.128413756	0.219718965	0.360157868
FBgn0015351	0.03491879	0.020046989	-0.004241825	-0.014627461
FBgn0023479	0.025226289	0.009833944	0.026576866	0.031619364
FBgn0027615	-0.014150229	-0.003917116	0.007921373	0.003454141
FBgn0035624	0.035538026	0.016282101	0.020674693	0.054689985
FBgn0034221	0.045357013	0.063101832	0.183401801	0.265709474
FBgn0035001	0.077695201	0.092379553	0.018149775	0.087797385
FBgn0027081	-0.031041409	0.025690757	0.060177694	0.100552129
FBgn0262481	0.019564339	0.007652395	0.018235932	0.036769092
FBgn0037899	-0.159290958	-0.108135255	0.079567605	0.006252698
FBgn0260477	0.103321336	0.018451467	0.048009479	0.068524917
FBgn0261283	0.148866696	0.075304771	0.162857601	0.218247121
FBgn0015614	0.055087116	0.039511877	0.079564352	0.102824721
FBgn0002069	-0.011044997	-0.021917341	0.119515398	0.077319108
FBgn0032029	0.002421957	0.007327939	-0.00484736	0.003364139
FBgn0053192	0.19875181	0.163126638	0.163996162	0.31846314
FBgn0265630	-0.058475597	-0.013573142	0.026204389	-0.010211307
FBgn0024889	0.041115255	0.034118911	0.051131376	0.091660231
FBgn0036043	0.317941308	0.145611779	0.221106288	0.384979319
FBgn0026373	-0.055940263	-0.036301916	0.033087395	-0.027007098
FBgn0036333	0.225846253	0.127927744	0.065410102	0.248378075
FBgn0031449	-0.002272752	-0.014363302	-0.001335609	-0.018250762
FBgn0035533	0.376272831	0.211409869	0.176984729	0.340514682
FBgn0030757	-0.007695018	-0.001516588	-0.00541528	-0.010333605
FBgn0039052	0.005364318	-0.010342484	-0.007586903	-0.019099398
FBgn0023508	0.218225274	0.113048483	0.08829737	0.186372728
FBgn0035693	0.000910998	0.001524297	-0.000784332	0.003325084
FBgn0027610	0.093144987	0.02087937	0.14111701	0.150877038
FBgn0029705	-0.008177731	-0.003974374	-0.002996925	-0.001324708
FBgn0040906	-0.005139628	-0.004973673	-0.001921677	-0.007372629
FBgn0001624	0.513568478	0.292644222	0.118077172	0.435415258
FBgn0050156	-0.00425751	-0.005614556	0.000846443	0.005177717
FBgn0030121	-0.028617859	-0.008536283	-0.005418796	-0.013718512
FBgn0040475	0.077936951	0.046435553	0.094437952	0.150066568
FBgn0029891	0.055308037	0.042092288	0.058322804	0.116866037
FBgn0033340	0.165418628	0.081709099	0.175971369	0.240856121
FBgn0015245	-0.404760131	-0.285115695	-0.000357419	-0.209266694
FBgn0267365	0.058280888	0.005307881	0.029259481	0.08303877
FBgn0259175	0.168937721	0.095258514	0.092210397	0.188670565
FBgn0010220	-0.036401422	-0.029265125	0.004215775	-0.04907967
FBgn0001276	0.014852506	-0.003490222	0.014460482	0.022174507
FBgn0053180	0.045958493	0.058712413	-0.008419139	0.059704421
FBgn0259795	-0.010186015	0.030715941	-0.036065597	-0.01463749
FBgn0002579	-0.199208077	-0.121349306	-0.033760993	-0.162366458
FBgn0037913	-0.27456941	-0.111205362	0.053924132	-0.076780369
FBgn0264785	0.189809899	0.120378162	0.102444836	0.218766717
FBgn0010228	-0.354158894	-0.181660442	-0.102578566	-0.282107913
FBgn0031604	-0.040718048	-0.019732244	0.009985906	-0.021191766
FBgn0262738	0.203556339	0.127636009	0.109345972	0.19995993
FBgn0035137	0.073240058	0.046900812	0.03350203	0.118740648
FBgn0267824	0.009582108	0.02007503	0.00589484	0.023412692
FBgn0029521	0.041612739	0.015788184	0.020217316	0.040281554
FBgn0032956	0.175962651	0.147698895	0.066936838	0.244388787
FBgn0263237	-0.014156873	-0.022311394	0.032239527	0.012630559
FBgn0036545	-0.001741192	0.00195811	-0.049685261	-0.015064142
FBgn0025684	0.031968919	0.019230555	0.04425586	0.047660934
FBgn0051815	-0.03853486	-0.029868106	-0.014130119	-0.024236981
FBgn0031484	0.059677075	0.033376991	0.041651407	0.08034221
FBgn0032856	0.110802695	0.02053523	0.051320338	0.074257287
FBgn0283503	0.000614726	0.001865611	0.020388924	0.025390216
FBgn0043841	0.166732779	0.074771912	0.198372255	0.18900696
FBgn0033584	-0.019805115	-0.007267156	0.001199267	-0.001174292
FBgn0036198	0.169214142	0.056813892	0.147499178	0.193353853
FBgn0015828	-0.003014618	0.015183645	0.017962029	0.0189279
FBgn0003308	-0.027504985	-0.014546742	-0.019032719	-0.034693587
FBgn0004381	0.250864678	0.128514937	0.131534615	0.296938066
FBgn0031030	0.453431879	0.23682415	0.222184974	0.475751082
FBgn0036958	-0.041086132	-0.016890153	0.027178076	-0.025899916
FBgn0003346	-0.119343075	-0.051273762	0.051455991	0.004273633
FBgn0039637	0.129109245	0.066426722	0.085500951	0.166356242
FBgn0030218	-0.103593349	-0.044419429	-0.05261883	-0.141153659
FBgn0036569	0.004814072	0.01532668	-0.009366474	0.019784346
FBgn0031893	0.017750965	0.006484183	0.018524688	0.028717032
FBgn0086686	0.226427323	0.104377941	0.093610568	0.165184374
FBgn0052650	-0.00767475	-0.004332731	0.000490766	-0.008481471
FBgn0002780	-0.182373158	-0.098143473	0.118626949	-0.012792629
FBgn0033244	0.146938457	0.053239841	0.112847648	0.196012752
FBgn0035204	0.174101989	0.079925808	0.108597352	0.184219255
FBgn0032259	0.033590822	0.023397901	0.006757175	-0.014136927
FBgn0030478	-0.016692182	0.013556371	-0.097489745	-0.047537703
FBgn0264325	0.049829336	0.050362683	0.013972401	0.05505497
FBgn0031822	-0.024559144	0.019581202	0.032878974	0.064036088
FBgn0032346	-0.099094706	-0.037778858	0.032727024	0.026550349
FBgn0030347	-0.018039525	-0.012725548	-0.001513216	-0.024058282
FBgn0029507	0.783718854	0.35229648	0.508626704	0.843966113
FBgn0036915	0.011925678	0.006168187	0.014160003	0.008808772
FBgn0033656	0.016527169	0.00715394	-0.003997587	0.016728847
FBgn0015360	0.034992837	0.016933581	0.007407804	0.020793431
FBgn0052368	0.011638901	-0.018322076	0.033202028	0.00330169
FBgn0051098	-0.007252952	0.029430607	-0.046523225	-0.045112612
FBgn0263278	0.014510555	0.015095365	0.006733232	0.017589277
FBgn0032195	-0.00049528	0.017458496	0.006398342	0.016455856
FBgn0031428	0.0156674	0.024683386	-0.000125524	0.042873114
FBgn0039274	-0.003365175	-0.007493942	0.028667882	0.024201469
FBgn0037251	-0.029348097	-0.022815909	0.009183491	-0.000780506
FBgn0266710	-0.000385594	0.004759509	-0.004190006	0.001851468
FBgn0005427	0.106074704	0.050119262	0.055314908	0.15147596
FBgn0031384	-0.00763923	-0.003509038	-0.003960768	-0.016000717
FBgn0050463	-0.193434492	-0.108652831	-0.051922454	-0.146540379
FBgn0010398	0.023233664	0.011537622	-0.005678789	0.019766
FBgn0034368	0.404173096	0.22624258	0.182010313	0.353274343
FBgn0051064	0.093971349	0.034758001	0.049520473	0.076997177
FBgn0261584	-0.059934201	-0.028623692	0.037050323	0.021793932
FBgn0035356	0.054900396	0.018510654	0.036202802	0.069984444
FBgn0035149	-0.045117195	-0.021090919	0.010060184	0.024450635
FBgn0067864	0.014199459	0.04144434	0.029989063	0.05765551
FBgn0026238	-0.041605945	0.037108958	-0.001731925	-0.038356455
FBgn0053087	0.155713465	0.066003843	0.11160223	0.168076134
FBgn0036162	-0.014855368	-0.005902788	-0.013621418	-0.009667114
FBgn0025674	0.063922127	0.043595727	0.072006284	0.078012152
FBgn0264751	0.020181312	-0.015916608	0.030322235	0.03320865
FBgn0042712	0.162437989	0.125331142	0.061823411	0.210806782
FBgn0033539	0.108926936	0.058477577	0.091666505	0.132316687
FBgn0029504	0.26083037	0.175129133	0.156888562	0.311416493
FBgn0041781	0.356589072	0.244733344	0.169555108	0.385477589
FBgn0016685	-0.340758488	-0.188199821	-0.033803374	-0.287921485
FBgn0037356	0.046855715	0.027501186	0.023914211	0.055770078
FBgn0032420	0.151819997	0.069997528	0.111754981	0.183828299
FBgn0027492	0.420768638	0.232489799	0.147532853	0.37034584
FBgn0036571	0.092637862	0.050163801	0.028747783	0.07563401
FBgn0032464	0.001801272	0.001690231	0.004687911	0.007249927
FBgn0014024	-0.045219876	0.011309006	0.018138938	0.009579601
FBgn0033121	0.219267082	0.083506875	0.062404325	0.13607538
FBgn0017578	-0.00929691	-0.019675756	0.042379068	0.023182192
FBgn0033460	0.158053936	0.090198776	0.060158719	0.121819921
FBgn0024314	-0.008439925	-0.023941422	0.096992041	0.06523516
FBgn0264492	0.080914961	0.044357995	0.128397809	0.123594827
FBgn0025814	-0.015802577	-0.071581706	0.018354504	-0.057196194
FBgn0003345	0.219557238	0.163714677	0.146909469	0.308397399
FBgn0033471	-0.016804129	0.02475589	0.02843328	0.067209725
FBgn0032620	-0.116238615	-0.060839001	0.024643646	-0.038014341
FBgn0266570	-0.107855468	-0.026726176	0.007984888	-0.015291203
FBgn0025109	0.052975466	0.050885542	0.033029865	0.069609038
FBgn0032105	-0.112793994	0.003594582	-0.027328301	-0.053790004
FBgn0034879	-0.059803805	-0.024924951	1.55E-05	-0.00103002
FBgn0264815	-0.307438163	-0.223544882	-0.213308967	-0.463269756
FBgn0061476	-0.059258471	-0.015789241	-0.017329828	-0.00126834
FBgn0029942	-0.009801362	0.005216072	0.005965316	0.017920999
FBgn0020272	0.151723455	0.077306499	0.109394175	0.184804564
FBgn0035402	0.09478374	0.031789936	0.051895813	0.118320745
FBgn0004915	0.019783355	0.006982416	0.049183043	0.050231018
FBgn0036291	0.015790158	0.009557764	0.002969383	0.024186385
FBgn0265962	-0.003439903	-0.007857579	0.008567436	0.004283195
FBgn0032052	0.041647281	0.018858136	0.004472814	0.035419954
FBgn0041191	0.160760732	0.096752336	0.059219492	0.175281707
FBgn0036334	-0.397294698	-0.278670677	0.059987874	-0.240903856
FBgn0033356	0.052115005	0.005570073	0.047442236	0.067131855
FBgn0038424	0.146020972	0.097419597	0.072514227	0.137478787
FBgn0261802	0.009044503	0.024990151	-0.059286473	-0.011937151
FBgn0261671	0.126584689	0.142017057	-0.009136544	0.124445865
FBgn0038235	-0.000464485	0.017156745	0.004275208	0.008422835
FBgn0261597	-0.171429443	-0.111957549	-0.011574582	-0.127397822
FBgn0052100	0.015287717	0.01826511	0.00845105	0.036384132
FBgn0030717	0.047572741	0.024240333	0.011955261	0.024989737
FBgn0028743	-0.019435633	-0.023402337	-0.005265959	-0.03304097
FBgn0033540	-0.028890311	-0.013781404	-0.018221244	-0.047211018
FBgn0021814	0.131796595	0.069355211	0.102702218	0.170171508
FBgn0039302	-0.109088757	-0.023130663	0.039746908	0.063791352
FBgn0052816	-0.139314258	-0.096043018	-0.050814261	-0.118568141
FBgn0036136	0.036762173	0.077264633	0.017988291	0.058312196
FBgn0039698	0.047543548	0.021323996	0.074808762	0.073701537
FBgn0039687	-0.042624372	0.000265584	0.042744672	0.030521986
FBgn0261811	-0.016689732	0.022909809	-0.028172019	0.028090022
FBgn0032595	0.060125741	-0.002127245	0.07949345	0.074860027
FBgn0036991	-0.017561979	-0.007980104	-0.001991937	-0.009085347
FBgn0035880	-0.014236524	-0.009599866	-0.004227205	-0.005674023
FBgn0011705	-0.060567923	0.070342127	0.02770297	0.074639009
FBgn0003943	0.310221699	0.156275049	0.214190632	0.421019393
FBgn0050089	-0.018885398	-0.003991099	-0.00229616	-0.011341899
FBgn0264343	-0.107406526	0.018663108	-0.031394408	-0.01633489
FBgn0034743	-0.197580935	-0.116568249	-0.018477564	-0.150863077
FBgn0036580	0.110017968	0.07042154	0.119899914	0.204637947
FBgn0053668	0.004669453	0.003117044	-0.001479027	0.003475662
FBgn0035438	0.298221338	0.148735478	0.177745607	0.342525108
FBgn0016978	-0.063157061	-0.017512054	0.017640847	-0.015954377
FBgn0034959	-0.010171933	-0.002735662	-0.006444656	-0.015122754
FBgn0033174	-0.014054517	-0.006724711	0.00193328	-0.00591598
FBgn0032455	-0.017444286	-0.010269912	0.041856367	0.044698644
FBgn0038909	0.195318848	0.116911001	0.103851309	0.233440802
FBgn0028990	-0.14772555	-0.13353546	-0.143813356	-0.302310144
FBgn0024558	-0.174138131	-0.101403006	0.00909487	-0.052964669
FBgn0086712	0.010888392	0.026425117	-0.033178585	0.013795778
FBgn0035523	0.012838924	0.007208938	0.001622814	0.008848253
FBgn0033285	-0.002058037	0.030501336	-0.016566095	0.020840184
FBgn0260012	-0.053479808	0.012140821	-0.00616537	-0.0125562
FBgn0262886	0.025723192	-0.018972139	0.031386995	-0.004646928
FBgn0033890	-0.021020425	0.017140009	-0.026303204	-0.001512458
FBgn0024222	0.061525778	0.010665193	0.033903136	0.038870297
FBgn0015268	-0.345706098	-0.299273532	0.004677046	-0.329399316
FBgn0263395	0.330139844	0.181232846	0.117359306	0.301247158
FBgn0034727	-0.019203322	-0.001339221	0.030205181	0.03213269
FBgn0086472	-0.177100931	-0.111102529	-0.038372052	-0.151300516
FBgn0085284	-0.001499344	-0.019104855	0.030779358	0.009899806
FBgn0028894	0.261811832	0.164791585	0.089057368	0.28749562
FBgn0042085	-0.014421139	0.016186213	-0.01642682	0.008239157
FBgn0032253	-0.187389453	-0.084442843	-0.117671218	-0.244348224
FBgn0037710	-0.086728711	-0.051916165	-0.01409007	-0.111336033
FBgn0029858	0.012196703	-0.003285699	0.024073294	0.010926485
FBgn0033100	-0.116519378	-0.075429802	0.066377357	-0.012496997
FBgn0051374	0.061177874	0.013797906	0.056453447	0.064924025
FBgn0265508	0.019764264	0.026595758	-0.004689975	0.01511746
FBgn0261444	0.054636535	0.133180009	-0.013188396	0.082682957
FBgn0001122	0.321495814	0.164305077	0.151038651	0.281287682
FBgn0023514	-0.059935279	-0.040810291	0.031075803	-0.025385984
FBgn0035540	0.027391783	0.021493082	-0.007775097	-0.016294335
FBgn0086447	-0.076462002	-0.044561492	0.062049682	-0.001988951
FBgn0030268	0.344017054	0.203314458	0.120371384	0.295024606
FBgn0085317	-0.054816567	-0.018683517	-0.048598006	-0.051250305
FBgn0034128	0.002432746	-0.003901963	0.002832949	-0.000533185
FBgn0027601	0.008631998	0.057415862	-0.094068697	-0.061624354
FBgn0015829	0.03785938	0.034996362	0.02105466	0.048625147
FBgn0264291	-0.048406105	-0.0252365	0.002699872	-0.022106083
FBgn0031361	0.007963685	0.00305896	0.042056884	0.034889931
FBgn0037756	-0.094124164	-0.028841689	-0.016690585	-0.083650492
FBgn0038735	0.156017394	0.062146262	0.049080995	0.096363825
FBgn0263864	0.031371891	0.052286277	0.01462447	0.076178337
FBgn0011817	0.339979606	0.174642722	0.11311995	0.253267966
FBgn0063649	0.048379702	0.066808246	0.051685787	0.067937123
FBgn0028396	0.026435092	0.016195762	0.021246508	0.033411514
FBgn0032822	-0.010613587	-0.006332361	0.015989423	-0.006196612
FBgn0032625	-0.013296121	0.00930987	-0.022621586	-0.021531877
FBgn0036565	-0.014518702	-0.002248167	-0.004645852	0.005054861
FBgn0029896	0.300629422	0.118293247	0.329581799	0.462990456
FBgn0029915	-0.078459782	-0.055046455	0.073811192	-0.000777822
FBgn0263047	0.004560582	0.003903573	0.005487805	0.006543189
FBgn0035854	-0.093937777	-0.033456356	0.013510166	-0.035306544
FBgn0036302	0.147400168	0.112615629	0.019199245	0.125184255
FBgn0010380	0.157521599	0.124568274	0.013700274	0.145282487
FBgn0039306	-0.06599774	-0.035062413	0.02563352	-0.029139292
FBgn0285950	-0.169676923	-0.090030049	-0.043909833	-0.120934801
FBgn0020278	0.355504205	0.240032843	0.194003057	0.426130555
FBgn0085484	-0.013556753	-0.013563732	-0.029039207	-0.062263425
FBgn0262647	0.005356285	0.023989132	-0.016911188	0.029052799
FBgn0036587	-0.090035003	-0.019475064	-0.071042062	-0.075153308
FBgn0003117	0.307723759	0.163805266	0.148818548	0.265465023
FBgn0035374	-0.058068284	-0.037449631	0.044034943	0.050866022
FBgn0020379	-0.011034291	-0.003559479	-0.001830186	-0.009338571
FBgn0034914	0.337200304	0.110672563	0.177071156	0.280129301
FBgn0033458	-0.046851464	-0.016769866	-0.039826694	-0.04194
FBgn0284251	-0.087261187	-0.052995786	0.089540491	0.024466437
FBgn0036484	0.019915897	0.017680915	0.037683561	0.03935819
FBgn0053556	0.099227792	0.019056355	0.07617407	0.098359207
FBgn0032170	0.206848214	0.09473187	0.058163854	0.149895904
FBgn0010408	-0.170089503	-0.090877218	-0.020549303	-0.103718874
FBgn0050334	0.002763285	0.003553043	-0.002073474	0.005662373
FBgn0046294	-0.043387284	0.058624082	-0.10304489	-0.044166436
FBgn0039303	0.088339145	0.126909515	0.015939807	0.142269855
FBgn0038903	-0.047646964	-0.018527252	0.049606737	0.035107483
FBgn0050349	-0.133411648	-0.057157592	0.060458034	0.034339729
FBgn0033232	-0.050613769	-0.013616389	-0.049260609	-0.031582616
FBgn0010774	-0.028209069	-0.021909257	0.058386509	-7.97E-05
FBgn0030406	-0.043011095	0.010073725	-0.012260976	-0.045032486
FBgn0039489	0.003060778	-0.001919922	0.008633939	0.016903518
FBgn0051038	0.049847572	0.011115463	0.019875211	0.02947968
FBgn0035107	0.139428204	0.09794682	0.029730135	0.106807389
FBgn0038972	0.01047426	-0.002057185	0.023507975	0.027995231
FBgn0014395	-0.002936806	0.002919891	-0.006696735	-0.004973088
FBgn0005777	0.035332625	0.043559738	-0.014753366	0.054300245
FBgn0001296	-0.194883338	-0.1002287	-0.162206919	-0.293022231
FBgn0037265	0.004184799	0.017061649	-0.00058747	0.007368094
FBgn0039589	0.055701583	0.023218035	0.00651217	0.048694035
FBgn0260861	0.131894233	0.074056459	0.098086497	0.186219385
FBgn0263755	-0.023217752	-0.00460154	0.021243355	0.019610645
FBgn0051740	0.000491794	0.028454233	-0.026447092	-0.001637991
FBgn0004106	-0.109308031	-0.033393628	0.017833378	-0.04395629
FBgn0004171	0.00073762	0.020182696	-0.018495556	0.007963995
FBgn0250824	0.000684983	0.002483537	-0.005645657	-0.004746544
FBgn0262866	0.038501657	0.017926694	-0.00243551	0.030990717
FBgn0035704	0.098941475	0.092172311	0.032672152	0.116417452
FBgn0031534	0.344095554	0.167701136	0.156907573	0.35213883
FBgn0031549	-0.013210601	0.012459558	0.006512842	0.013015915
FBgn0030679	0.035524204	0.015532239	0.019693454	0.01985392
FBgn0260008	-0.176917367	-0.175593168	0.123241596	-0.092547815
FBgn0035868	-0.022608962	0.085171624	-0.039334071	0.006589054
FBgn0027594	-0.087245735	-0.047674221	-0.025327593	-0.056236502
FBgn0039259	0.110806846	0.078561245	0.107385907	0.2040125
FBgn0038656	0.004631254	0.007417901	-0.003139919	0.001840608
FBgn0033738	0.138499514	0.088438527	0.047534609	0.134978601
FBgn0034033	0.004849945	-0.007048375	0.061464967	0.053303495
FBgn0026192	0.048875064	0.057038012	0.02525918	0.067373986
FBgn0037518	-0.002174701	-0.003704051	0.009639144	0.005799054
FBgn0050467	-0.006493318	0.007152506	0.002634965	0.003779159
FBgn0002567	0.095666231	0.094589502	0.017273599	0.090859963
FBgn0014877	-0.044936303	0.037052746	0.075839929	0.085719141
FBgn0066114	0.040696381	0.043974075	0.002533171	0.04241016
FBgn0000115	0.160691761	0.138109039	0.066676916	0.171374557
FBgn0000618	-0.038383606	-0.004034062	0.015562669	0.013181236
FBgn0029867	-0.057652593	-0.011178774	0.020502348	0.025175235
FBgn0033523	0.017135789	0.00864023	0.022364041	0.022268347
FBgn0028399	0.143506373	0.067677936	0.024516764	0.109106495
FBgn0004606	0.252063657	0.092904391	0.175404417	0.234231801
FBgn0052392	0.00599642	0.009502875	-0.000582321	0.003129678
FBgn0261385	-0.188990985	-0.081993418	-0.064681929	-0.185836555
FBgn0037358	0.161879362	0.089226619	0.074202213	0.120627645
FBgn0036857	-0.302078458	-0.161737498	-0.174239242	-0.346441068
FBgn0036688	0.135235123	0.078411698	0.078231836	0.14558292
FBgn0030025	0.003975587	-0.017722675	0.017064648	-0.028035243
FBgn0036448	0.203140009	0.112708907	0.116509774	0.215350186
FBgn0250816	0.040553897	0.007979842	0.004984541	0.00496786
FBgn0031782	-0.052298413	-0.023488088	-0.02661413	-0.012855073
FBgn0028484	0.036126518	0.024959078	0.019148347	0.039053877
FBgn0039099	0.100720982	0.026334072	0.029249867	0.049176374
FBgn0029823	-0.217266538	-0.121744837	0.031605172	-0.033896577
FBgn0026722	0.00905987	0.000417237	-0.003926391	-0.030298197
FBgn0032518	-0.248833284	-0.230609232	0.003941428	-0.260436406
FBgn0265140	0.257617842	0.164385483	0.134534633	0.290695408
FBgn0051855	0.030756125	0.032962976	0.01565426	0.033623839
FBgn0035082	0.005703617	-0.017906338	-0.002530653	-0.028867699
FBgn0036772	-0.031682428	-0.002763598	-0.02436736	-0.037960785
FBgn0004509	0.161207463	0.085334242	0.084445954	0.184654942
FBgn0027580	0.328214188	0.118718654	0.233771183	0.343726219
FBgn0261049	0.082236219	0.05179645	0.014432843	0.057345443
FBgn0004396	0.003905633	0.035487432	0.090700629	0.09354373
FBgn0032796	0.022048499	0.014995259	-0.009779242	-0.002963719
FBgn0030300	0.022406127	0.045707066	-0.00363988	0.056076415
FBgn0033814	0.057332833	0.045772523	0.008659472	0.060545976
FBgn0034058	-0.050824047	-0.030023089	0.001107673	-0.040303151
FBgn0023515	-0.058827157	-0.027459286	-0.023551641	-0.054543789
FBgn0051337	-0.259970012	-0.171486886	-0.263267126	-0.43298884
FBgn0029979	-0.090933895	0.025156703	-0.022629266	-0.044157767
FBgn0028538	0.113276393	0.067760704	0.066427927	0.145352062
FBgn0034390	-0.356870763	-0.298253347	-0.1546672	-0.454405729
FBgn0030694	0.140310813	0.074139637	0.023799449	0.115882669
FBgn0000173	0.391932948	0.145743913	0.198891681	0.303247833
FBgn0050187	0.094495385	0.045421078	0.001358557	0.033616058
FBgn0039013	-0.010683982	0.00194043	-0.002025728	-0.002416584
FBgn0038461	-0.010521859	-0.010894154	0.029020816	0.039304743
FBgn0027568	0.030809279	0.027908492	0.013822942	0.015904269
FBgn0053465	-0.038891148	-0.043322171	-0.024200294	-0.049002258
FBgn0034035	0.128518327	0.04998692	0.064788501	0.051449019
FBgn0038110	0.015717168	0.006972291	0.007148325	0.008589115
FBgn0037707	-0.078692698	-0.019730348	0.062176819	0.050679245
FBgn0010300	-0.183655635	-0.084248386	-0.017099478	-0.142597612
FBgn0037551	0.188056309	0.116801465	0.092104007	0.225338514
FBgn0034961	0.034947069	0.018424388	0.00457464	0.007082483
FBgn0013469	-0.107868646	-0.110087515	-0.028290566	-0.134236907
FBgn0039993	-0.013033572	0.012756821	-0.004207096	0.008905264
FBgn0264776	-0.000135802	0.001656906	-0.000854283	-0.001385114
FBgn0264490	0.025651533	0.026551269	0.127318804	0.164064792
FBgn0039261	-0.013427581	0.027148111	0.005259951	0.029197386
FBgn0034523	-0.069978994	-0.031335832	-0.004724612	-0.024684326
FBgn0033468	0.064934693	0.040952918	0.031745758	0.038689473
FBgn0035196	-0.015172156	0.0091257	-0.024950033	-0.010154482
FBgn0028507	0.134413877	0.091935471	0.058702057	0.16986794
FBgn0260859	0.051849409	0.076720436	-0.030722801	0.038601218
FBgn0261702	0.049240235	0.030478169	0.019036548	0.052380218
FBgn0264437	-0.412503446	-0.146753535	0.254262504	0.030562838
FBgn0035587	0.348083684	0.043529524	0.313101162	0.360765355
FBgn0052380	0.110980821	0.074874415	0.074035692	0.151470914
FBgn0265726	0.050382614	0.011985493	0.037322417	0.039635619
FBgn0033266	0.03314463	0.002725632	0.007326264	0.000890245
FBgn0039740	0.005614388	0.006156348	0.016230615	0.022211033
FBgn0051633	0.010822943	-0.000706859	0.011966411	0.018606683
FBgn0002626	-0.196975627	-0.136434348	-0.01546558	-0.15927615
FBgn0000405	-0.179539929	-0.050831124	-0.109883007	-0.141781416
FBgn0033208	-0.055139916	-0.036569099	0.082556405	0.045517578
FBgn0038658	0.061274795	0.024522486	0.036590196	0.063469378
FBgn0266284	-0.030584722	-0.013815572	0.027440734	0.005761998
FBgn0037342	0.004741585	0.013673903	0.04516344	0.06597226
FBgn0002622	-0.30849128	-0.216902326	-0.041221801	-0.249248728
FBgn0035590	0.072501698	0.063567694	0.066003524	0.163650409
FBgn0270924	-0.019388008	0.013466333	0.001555145	-0.0087846
FBgn0010926	-0.075611922	-0.039567845	0.021029493	-0.010259607
FBgn0038842	0.527781999	0.189060234	0.272949659	0.476349646
FBgn0031951	0.03009937	0.039121065	0.031245739	0.064638268
FBgn0040918	0.268129253	0.081636578	0.203036758	0.233778128
FBgn0052831	0.005457272	0.011118159	-0.003368572	-0.021983022
FBgn0002924	-0.13926048	-0.056725525	0.01448977	-0.019334023
FBgn0052847	0.000295365	0.002300791	-0.001598357	0.002948507
FBgn0032147	-0.07774913	0.002677657	-0.100674812	-0.089939963
FBgn0030065	0.079188493	0.038416621	0.073130246	0.119284205
FBgn0034432	0.016887915	0.013606174	0.082639006	0.123335822
FBgn0037045	0.04165844	0.025024951	0.013366004	0.034966004
FBgn0036927	-0.019331142	-0.004252193	-0.015168355	-0.01462871
FBgn0031535	0.050255735	0.040833115	0.041790372	0.091405056
FBgn0028506	0.006160614	0.021997973	-0.00409765	0.03597533
FBgn0014020	0.310127114	0.066884809	0.186522264	0.229806656
FBgn0039459	0.010550825	0.006332322	0.018058481	0.033828643
FBgn0259482	0.026550506	0.016415645	0.020577912	0.02960662
FBgn0050491	-0.027823252	0.003234157	-0.009573487	-0.021493987
FBgn0004867	-0.22186377	-0.11952376	-0.065538946	-0.185528128
FBgn0259896	-0.10666704	-0.113020917	-0.077497411	-0.243109575
FBgn0031478	0.096789088	0.064370804	-0.025380189	0.025979941
FBgn0031287	-0.019674485	-0.010712294	0.006942296	-0.021297067
FBgn0023167	-0.188349857	-0.038560479	-0.038557383	-0.07933159
FBgn0038432	0.093306718	0.062693641	0.033773487	0.096145482
FBgn0034068	0.047341804	0.047985713	0.015469471	0.039728456
FBgn0050354	0.000271052	0.001195433	-0.002804879	-0.009878357
FBgn0036085	-0.014020721	0.016049213	-0.024517532	-0.004020865
FBgn0017581	0.410538274	0.120570331	0.268430826	0.364682485
FBgn0031772	0.052710009	0.090018643	0.057363728	0.148855566
FBgn0029911	0.115595355	0.096322931	0.046034862	0.13153857
FBgn0035532	0.006004688	0.004481089	0.002766734	-0.004514671
FBgn0261549	0.145621147	0.047091673	0.097417091	0.141342001
FBgn0053926	-0.012073049	-0.017191636	0.006853841	-0.023002694
FBgn0032521	-0.024325804	-0.006613491	-0.014176218	-0.011816556
FBgn0001197	-0.307901899	-0.102527959	-0.002564922	-0.069927104
FBgn0031309	-0.011306919	-0.00752642	-0.00269657	0.00321857
FBgn0031620	-0.007405651	-0.003050553	-0.01095688	-0.010624185
FBgn0031766	0.007028376	-0.006587922	-0.000508858	0.000348527
FBgn0039505	0.309754892	0.14277151	0.113099089	0.304074543
FBgn0004465	0.066440518	0.038120799	0.058562989	0.089871742
FBgn0063670	0.058648082	0.073649754	0.039678474	0.091857236
FBgn0087013	-0.144588928	-0.049161813	-0.025895485	-0.038581641
FBgn0037719	0.04866301	0.043109727	0.040188127	0.084155886
FBgn0039402	0.295026274	0.14766893	0.1323647	0.285914939
FBgn0031611	0.07672985	0.048244972	0.017370046	0.09570554
FBgn0043362	0.0808544	0.04057627	0.032817205	0.080314786
FBgn0034354	0.028835274	-0.016221857	0.020701147	-0.003469936
FBgn0037687	-0.024317495	-0.030701938	-0.013270909	-0.068410572
FBgn0004698	-0.032195391	0.002896819	0.011612628	0.021304182
FBgn0028467	0.15632005	0.091486011	0.065041196	0.192627739
FBgn0033221	-0.011041191	-0.00410648	-0.007274114	-0.026875952
FBgn0024806	0.235485576	0.138630041	0.103295331	0.262123809
FBgn0263212	0.053676183	0.012411604	0.020432619	0.03609759
FBgn0036975	-0.010014677	0.004896234	-0.013683083	-0.020520965
FBgn0261674	0.046982188	0.062583351	0.006082845	0.074365699
FBgn0053635	0.048393175	0.03299631	0.01389635	0.063716175
FBgn0035285	0.263434936	0.117176313	0.0908154	0.214885001
FBgn0032454	-0.04158412	0.011947842	0.000158258	-0.023471702
FBgn0039929	-0.110597673	-0.032568454	0.034203154	-0.01333833
FBgn0038652	-0.003102885	0.004233716	0.0896306	0.058513923
FBgn0034416	-0.021258493	0.001237439	-0.001438175	0.009254455
FBgn0033770	0.000906099	0.010946234	-0.016294772	-0.006110804
FBgn0032409	0.190300012	0.115282159	0.128656931	0.233890285
FBgn0010741	0.264075073	0.152145935	0.138296204	0.313222152
FBgn0030291	-0.035158711	-0.026684491	0.031725223	0.004265676
FBgn0005278	-0.193831426	-0.134257923	0.051867443	-0.157877744
FBgn0015509	0.070224822	0.060354539	0.016432427	0.07469846
FBgn0042180	0.008879007	-0.003488252	0.02186287	0.019298088
FBgn0033806	0.010742477	0.020239503	0.012492818	0.020151831
FBgn0033000	-0.052543009	0.04231271	0.019199113	0.125578346
FBgn0015571	-0.008052153	-0.002090558	-0.008956314	-0.021229405
FBgn0039665	0.097454361	0.095372209	0.034527916	0.144358587
FBgn0037236	-0.064029984	-0.011648616	-0.025814739	-0.064955163
FBgn0029860	0.106073673	0.088296313	0.061273849	0.134389277
FBgn0028707	-0.012682145	0.00034828	-0.002703341	-0.004138967
FBgn0013764	-0.003554499	0.016870958	0.020107974	0.018515378
FBgn0025366	-0.142595172	-0.067666934	0.046471087	-0.056893659
FBgn0004050	0.00825676	0.00904347	0.055205406	0.083914283
FBgn0027521	0.003629793	0.00308047	-0.002378742	0.000304846
FBgn0032700	0.005133496	0.004456558	0.007584308	0.028730549
FBgn0259113	-0.051415887	-0.011985458	-0.023126887	-0.044321218
FBgn0250822	3.30E-05	0.004010086	-0.005356069	-0.001805375
FBgn0086908	-0.042118996	0.005956832	-0.027985026	-0.013677916
FBgn0058002	0.037449252	0.029771325	0.057624989	0.085514515
FBgn0260935	0.056585291	0.038290814	0.023950878	0.047808194
FBgn0039188	0.056707553	0.023678006	-0.015354547	0.035707558
FBgn0086895	0.072338478	0.055942736	0.024316277	0.07806436
FBgn0250844	0.004004951	0.019259195	-0.014051557	-0.002693877
FBgn0030720	-0.157428345	-0.078621351	0.06780205	-0.016200679
FBgn0262081	0.066134384	0.086292717	0.048191584	0.179089327
FBgn0030004	-0.00628016	0.003669579	-0.006578912	-0.012436079
FBgn0039129	-0.048159095	-0.020893931	0.06014763	0.058402655
FBgn0058263	-0.045397899	-0.025890151	0.00842891	-0.001830103
FBgn0029840	0.011135982	0.016242366	0.032152047	0.070141578
FBgn0283625	0.009676354	0.012600942	-0.004942429	0.000480273
FBgn0033724	-0.250482595	-0.202039715	-0.107924533	-0.306116053
FBgn0033672	0.021813191	0.003692304	0.103396444	0.111915536
FBgn0266668	0.077057072	0.024942581	0.040790137	0.126864139
FBgn0034968	-0.223330539	-0.153726937	-0.004964825	-0.170517914
FBgn0028499	-0.003402244	0.001490174	-0.007376534	-0.001852653
FBgn0086779	0.086581705	0.169023857	-0.026370303	0.09725024
FBgn0036911	0.098797973	0.062349814	0.021898884	0.081749912
FBgn0025682	-0.354138836	-0.217483637	-0.098058612	-0.270597558
FBgn0020261	-0.015322717	-0.033717909	0.036605624	0.031906478
FBgn0029959	0.080341984	0.032780787	0.099903902	0.141086903
FBgn0021825	0.118032677	0.100749215	0.044988351	0.122703394
FBgn0037137	-0.200121127	-0.08169674	-0.016070649	-0.124732907
FBgn0050403	-0.007965695	-0.001995447	0.000812678	-0.006355756
FBgn0035444	0.192796004	0.067052146	0.119563477	0.1557946
FBgn0001235	0.130456393	0.101389765	0.041602947	0.15091897
FBgn0036816	0.340695694	0.20144848	0.187971268	0.360917672
FBgn0017572	0.352074896	0.176776285	0.212808782	0.421795957
FBgn0000326	0.009810855	0.010500056	0.002206968	0.015441084
FBgn0024985	0.226137227	0.10171852	0.130768712	0.250363179
FBgn0000046	-0.001603729	0.011435535	0.005231549	0.025264008
FBgn0058045	0.212209647	0.051468009	0.178004807	0.250422833
FBgn0020376	0.195197418	0.088807571	0.138166835	0.194477773
FBgn0030846	0.010876961	0.006947605	0.001523418	0.013817399
FBgn0031440	-0.006910988	-0.006007686	-8.66E-05	0.005060505
FBgn0037973	0.063604624	0.050756438	0.041012084	0.08519963
FBgn0030746	0.003497606	0.00594673	0.001067557	0.007514874
FBgn0030994	-0.048375242	-0.032181455	-0.069620113	-0.04828977
FBgn0038344	-0.023460638	-0.021448518	0.033904613	-0.0348379
FBgn0000257	0.040347962	0.057877921	0.012298274	0.053388714
FBgn0037656	0.006620603	0.010372485	0.002949906	-0.004511768
FBgn0028468	0.039223862	0.027634748	0.03182736	0.062449467
FBgn0040068	0.035719373	0.028094829	-0.021994866	0.006460049
FBgn0266019	0.22978968	0.109145803	0.121568413	0.189027296
FBgn0038342	0.008371445	0.015006409	-0.010047618	0.003588011
FBgn0010039	0.445792318	0.161775488	0.247336987	0.386897241
FBgn0014930	0.05874523	-0.001808196	0.059062228	0.040309445
FBgn0030711	-0.053243771	0.01555854	0.075353377	0.06082085
[truncated: 5,717 more rows]
