# Supplementary material for: Constitutive activation of cellular immunity underlies the evolution of resistance to infection in Drosophila
Source: eLife. 2020 Dec 24;9:e59095. doi: 10.7554/eLife.59095 (PMC7785293; doi:10.7554/eLife.59095)
Supplement: Figure 4—source data 1. [file elife-59095-fig4-data1.xlsx]

## Sheet: Figure 4 source data
Figure 4 source data

## Sheet: Panel A
Selection regime	Treatment	Cluster	Number of cells
No Parasitism	No Infection	PLASM1	1173
High Parasitism	No Infection	PLASM1	1482
No Parasitism	Infection	PLASM1	1451
High Parasitism	Infection	PLASM1	1615
No Parasitism	No Infection	PLASM2	936
High Parasitism	No Infection	PLASM2	730
No Parasitism	Infection	PLASM2	509
High Parasitism	Infection	PLASM2	699
No Parasitism	No Infection	CC	273
High Parasitism	No Infection	CC	217
No Parasitism	Infection	CC	215
High Parasitism	Infection	CC	201
No Parasitism	No Infection	MET	104
High Parasitism	No Infection	MET	100
No Parasitism	Infection	MET	39
High Parasitism	Infection	MET	40
No Parasitism	No Infection	AMP	41
High Parasitism	No Infection	AMP	28
No Parasitism	Infection	AMP	55
High Parasitism	Infection	AMP	72
No Parasitism	No Infection	LAM1	41
High Parasitism	No Infection	LAM1	320
No Parasitism	Infection	LAM1	426
High Parasitism	Infection	LAM1	473
No Parasitism	No Infection	LAM2	321
High Parasitism	No Infection	LAM2	1170
No Parasitism	Infection	LAM2	1800
High Parasitism	Infection	LAM2	1813
No Parasitism	No Infection	LAM3	195
High Parasitism	No Infection	LAM3	493
No Parasitism	Infection	LAM3	1196
High Parasitism	Infection	LAM3	1116

## Sheet: Panel C
Cell	FBgn0032422	ident
AAACCTGCAGCCTTTC	5.72285	LAM2
AAACCTGCATCGACGC	4.91245	LAM2
AAACCTGGTACCTACA	6.01187	LAM2
AAACCTGGTCAAAGCG	2.44846	PLASM1
AAACCTGTCCCAACGG	2.71783	PLASM1
AAACCTGTCCGAACGC	6.53241	LAM2
AAACCTGTCTCATTCA	4.68437	LAM1
AAACGGGAGAATGTGT	5.34132	LAM2
AAACGGGAGACATAAC	6.10737	PLASM1
AAACGGGCAATGAAAC	6.30454	LAM2
AAACGGGCATTAACCG	6.58767	LAM2
AAACGGGGTGCACTTA	6.71604	LAM3
AAACGGGTCACTCTTA	5.00219	LAM2
AAACGGGTCTTATCTG	4.3398	LAM1
AAAGATGAGTTCGATC	6.50071	PLASM1
AAAGATGCACAACGTT	2.46488	LAM1
AAAGATGCATACGCCG	6.02795	LAM2
AAAGATGGTGAGCGAT	6.12901	LAM2
AAAGATGTCAGCTCGG	5.85679	LAM3
AAAGCAACATTCACTT	3.57545	LAM2
AAAGCAATCAAGCCTA	5.89781	LAM3
AAAGCAATCTCCTATA	6.24486	LAM2
AAAGCAATCTTACCGC	6.21577	LAM3
AAAGTAGAGTGTGGCA	1.55502	PLASM1
AAAGTAGCACAACTGT	5.60955	LAM3
AAAGTAGCATTCTCAT	6.26008	LAM2
AAAGTAGGTAGCGTGA	4.76489	LAM2
AAATGCCAGTAATCCC	6.74932	LAM3
AAATGCCAGTGCGATG	4.60097e-06	PLASM1
AAATGCCCACGGATAG	3.36975	PLASM1
AAATGCCCAGCCACCA	5.23066	LAM1
AAATGCCCATCTGGTA	5.90332	LAM2
AAATGCCGTATCAGTC	1.88461	PLASM1
AAATGCCGTGCTAGCC	2.35384	PLASM1
AAATGCCTCAGAGCTT	6.01348	LAM2
AAATGCCTCTGAAAGA	2.35144	PLASM1
AACACGTAGAGACTAT	6.69131	LAM2
AACACGTCACATTCGA	3.373	LAM2
AACACGTCATTAGGCT	5.84287	LAM2
AACACGTGTCGAACAG	6.42361	LAM3
AACACGTGTGTTTGTG	5.73758	LAM2
AACACGTGTTACAGAA	3.26976	PLASM1
AACACGTGTTCAGACT	4.54051	LAM1
AACACGTGTTGAACTC	1.73126	PLASM1
AACCATGCACATCCAA	4.91531	LAM2
AACCATGCAGCTCCGA	3.13856	LAM1
AACCATGGTCTTGTCC	6.51351	LAM2
AACCATGGTTCCACTC	6.44443	LAM2
AACCATGTCCATGAAC	-4.31446e-06	PLASM1
AACCATGTCCCAACGG	2.64212	PLASM1
AACCATGTCGCCCTTA	6.75776	LAM3
AACCATGTCTCGCTTG	5.82861	LAM2
AACCATGTCTCTAAGG	5.85952	LAM2
AACCGCGCAAATACAG	2.23929	PLASM1
AACCGCGGTAGGGTAC	6.51567	LAM3
AACCGCGGTTGACGTT	6.11408	LAM2
AACCGCGTCTCCGGTT	6.62237	LAM3
AACGTTGCATAGTAAG	6.22384	LAM2
AACGTTGTCAAGGTAA	5.32828	LAM2
AACGTTGTCTTAACCT	6.97227	LAM2
AACTCAGAGAGTGAGA	2.96826	PLASM1
AACTCAGAGATGGCGT	6.01475	LAM2
AACTCAGAGCCCAACC	5.81824e-06	PLASM1
AACTCAGGTAAATGAC	6.85138	LAM3
AACTCAGGTACCATCA	5.94181	LAM2
AACTCAGTCACTATTC	6.40333	LAM2
AACTCCCAGACTAGGC	5.61537	LAM2
AACTCCCCATTAGCCA	3.14457	PLASM1
AACTCCCCATTATCTC	6.18591	LAM2
AACTCCCGTCCCTTGT	5.79182	LAM2
AACTCCCGTGCGAAAC	5.88679	LAM1
AACTCCCTCAAAGACA	5.32614	LAM2
AACTCCCTCCGGCACA	6.08091	LAM2
AACTCTTAGAGGTTAT	3.12811	PLASM1
AACTCTTAGCTCCCAG	5.50777	LAM2
AACTCTTAGGGAACGG	5.75186	LAM2
AACTCTTCATCACGTA	6.01008	LAM2
AACTCTTGTAAGTGTA	5.66577	LAM1
AACTCTTTCTCGATGA	6.75042	LAM3
AACTGGTAGTTGTAGA	5.75285	LAM2
AACTGGTCAAGGCTCC	5.37304	LAM2
AACTGGTCATGGTCAT	2.47454	PLASM1
AACTGGTCATTAGGCT	2.16959	PLASM1
AACTGGTGTCATATGC	2.88076	PLASM1
AACTGGTGTCTGCAAT	5.09288	LAM2
AACTGGTGTGAGTGAC	4.62625	LAM1
AACTGGTGTTAAAGAC	6.26382	LAM3
AACTGGTGTTCTGGTA	7.17317	LAM3
AACTGGTGTTTACTCT	6.71968	LAM2
AACTTTCGTAGCTCCG	3.47861	PLASM1
AACTTTCGTCAACATC	4.98161	LAM1
AACTTTCGTTCGGGCT	6.05991	LAM3
AACTTTCTCATGTAGC	6.01383	LAM2
AACTTTCTCCTGCTTG	1.39111e-05	PLASM1
AAGACCTAGAGTCTGG	5.77076	LAM2
AAGACCTCAACCGCCA	6.23134	LAM2
AAGACCTCAAGTCTGT	6.03236	LAM3
AAGACCTCAATCACAC	2.44949	PLASM1
AAGACCTCACTGCCAG	5.48851	LAM2
AAGACCTCAGCGTCCA	5.64713	LAM2
AAGACCTCATCACGAT	3.38898	PLASM1
AAGCCGCAGGACCACA	5.73072	LAM2
AAGCCGCAGGAGTTGC	3.62601	LAM2
AAGCCGCCAAGTTGTC	3.91755	PLASM1
AAGCCGCCACCCAGTG	6.18912	LAM2
AAGCCGCGTTCAGGCC	1.05514e-06	PLASM1
AAGCCGCTCAGGTTCA	6.1588	LAM2
AAGGAGCGTAGCTAAA	3.61178	LAM2
AAGGAGCGTCGCCATG	6.69805	LAM2
AAGGAGCGTGAGGGAG	4.77655	LAM3
AAGGAGCGTTAAAGAC	3.44336	LAM1
AAGGAGCTCACATGCA	6.98144	LAM3
AAGGAGCTCTGGGCCA	5.15875	LAM1
AAGGCAGAGGCATTGG	3.1511	PLASM1
AAGGCAGAGTCATGCT	3.13604	PLASM1
AAGGCAGCACCGCTAG	3.72627	PLASM1
AAGGCAGCAGGCTCAC	2.37531	LAM1
AAGGCAGCATTCTTAC	6.12104	LAM2
AAGGCAGGTTACTGAC	2.95629	PLASM1
AAGGTTCAGCTGAAAT	1.37256e-06	PLASM1
AAGGTTCAGTATCGAA	5.92959	LAM2
AAGGTTCAGTGCTGCC	-1.47044e-05	PLASM1
AAGGTTCGTTGTGGCC	1.56561	PLASM1
AAGGTTCGTTGTTTGG	5.77245	LAM2
AAGGTTCTCTCAAACG	4.73173	LAM2
AAGGTTCTCTGAGGGA	2.46061	PLASM1
AAGTCTGAGAACTCGG	4.28297	LAM2
AAGTCTGCAGTAGAGC	-2.02468e-05	PLASM1
AAGTCTGCAGTGGAGT	-1.22475e-05	PLASM1
AAGTCTGGTGTCGCTG	6.17615	LAM2
AAGTCTGTCGCATGAT	5.54996	LAM2
AAGTCTGTCGGCTACG	6.74048	LAM2
AAGTCTGTCGTCCGTT	6.03029	LAM2
AAGTCTGTCTCTGCTG	6.22522	LAM2
AAGTCTGTCTTCGGTC	4.05107	LAM2
AATCCAGAGATGGGTC	4.23866	LAM1
AATCCAGGTCTACCTC	-1.1732e-06	PLASM1
AATCCAGTCCTTGCCA	2.9657	PLASM1
AATCCAGTCGCCCTTA	2.3401	PLASM1
AATCGGTAGAGTAAGG	6.38591	LAM2
AATCGGTAGTCTCGGC	3.43092	PLASM1
AATCGGTTCTGCCAGG	6.29729	LAM2
ACACCAAAGCCATCGC	2.23801	PLASM1
ACACCAACAAGTTGTC	6.30262	LAM3
ACACCAACAATCCAAC	-4.13869e-06	PLASM1
ACACCAACACAACGTT	2.57302	PLASM1
ACACCAACAGGCTCAC	5.78022	LAM2
ACACCAACAGTGGGAT	2.46079	PLASM1
ACACCAACATCGTCGG	6.45537	LAM3
ACACCAATCATCACCC	5.74583	LAM2
ACACCAATCCTTTACA	6.67407	LAM3
ACACCAATCGTGTAGT	6.15722	LAM2
ACACCAATCTAACTGG	3.56777	LAM2
ACACCAATCTTAGCCC	6.05816	PLASM1
ACACCCTAGGCGCTCT	4.5533	LAM1
ACACCCTAGTGTCTCA	5.4205	LAM2
ACACCCTCACGACTCG	2.63148	PLASM1
ACACCCTGTCTCCACT	1.8767	PLASM1
ACACCCTGTCTCCATC	5.92577	LAM2
ACACCCTGTGCTAGCC	2.35433	PLASM1
ACACCCTTCATGTGGT	-1.75526e-06	PLASM1
ACACCCTTCCAACCAA	6.77347	LAM3
ACACCGGCAAAGTGCG	3.60712	PLASM1
ACACCGGCAAGGTTCT	5.07457	LAM2
ACACCGGGTTCAGCGC	5.43169	LAM2
ACACTGAAGCTTTGGT	3.93895	LAM2
ACACTGAGTACGCACC	-9.92693e-06	PLASM1
ACACTGAGTCATGCCG	3.82739	LAM2
ACACTGATCGTACCGG	6.2396	LAM3
ACAGCCGCAGCCTTGG	6.13576	LAM3
ACAGCCGGTACTCTCC	6.32534	PLASM1
ACAGCCGGTATTCGTG	5.94286	LAM2
ACAGCCGGTCGACTAT	3.10218	LAM1
ACAGCTAAGCAAATCA	6.00188	LAM2
ACAGCTAAGCGATAGC	3.30697	PLASM1
ACAGCTACAGCTATTG	3.06931	LAM1
ACATACGCACTGTTAG	6.38031	LAM2
ACATACGGTTCCTCCA	4.77094	LAM1
ACATACGTCTCTTATG	6.29594	LAM2
ACATCAGAGAGTTGGC	5.98479	LAM3
ACATCAGAGATTACCC	5.8867	LAM3
ACATCAGAGGCTCTTA	3.44293	LAM1
ACATCAGCACAGCCCA	5.93589	LAM3
ACATCAGGTACATCCA	5.69419	LAM2
ACATCAGGTTCGAATC	7.06299	LAM3
ACATCAGGTTCTGAAC	6.74121	LAM3
ACATGGTAGAGACTAT	2.21115	PLASM1
ACATGGTAGCAATCTC	5.66088	LAM2
ACATGGTAGGCCCTCA	5.70656	LAM3
ACATGGTAGTTACGGG	6.18458	LAM2
ACATGGTCAATGGTCT	6.99788	LAM2
ACATGGTCAGGCTCAC	6.70547	LAM3
ACATGGTCATACTACG	6.88463	LAM3
ACATGGTGTGTTCGAT	5.98684	LAM2
ACATGGTTCCCTGACT	3.2639	PLASM1
ACCAGTAAGATCTGCT	6.20457	LAM2
ACCAGTACATTTGCCC	5.63636	LAM2
ACCAGTAGTATCAGTC	5.83545	LAM2
ACCAGTAGTCATCCCT	2.7175	PLASM1
ACCAGTAGTTCAGGCC	2.17431	PLASM1
ACCCACTCACCGGAAA	5.79275	LAM2
ACCCACTCATGTCGAT	1.50089	PLASM1
ACCCACTCATTTCACT	4.96239	LAM2
ACCGTAAAGTACTTGC	2.05954e-05	LAM2
ACCGTAATCCACGAAT	3.59506	PLASM1
ACCGTAATCTTCGAGA	4.06751	PLASM1
ACGAGCCAGAGCCTAG	5.72552	LAM3
ACGAGCCCAAGTTCTG	5.78955	LAM3
ACGAGCCCATGCTAGT	5.96825	LAM3
ACGAGCCGTAGAGCTG	5.78868	LAM2
ACGAGGAAGACCGGAT	3.62802	PLASM1
ACGAGGAAGAGCTGGT	6.39516	LAM3
ACGAGGACAAGTTAAG	2.12104	PLASM1
ACGAGGACAGCATACT	2.99697	PLASM1
ACGAGGACAGCGTCCA	5.80659	LAM2
ACGAGGACATGGATGG	3.74152e-07	PLASM1
ACGAGGAGTAAGTTCC	5.81701	LAM2
ACGAGGATCATCGGAT	3.41356	PLASM1
ACGAGGATCGAACTGT	6.08142	LAM3
ACGAGGATCTGGCGTG	3.20533	LAM1
ACGATACAGTGTTAGA	5.85933	LAM2
ACGATACGTGCACTTA	-3.51513e-06	PLASM1
ACGATACGTGTTGGGA	3.02102	PLASM1
ACGATGTAGGCGTACA	5.23199	LAM1
ACGATGTGTGGTTTCA	4.14478	PLASM1
ACGATGTTCAGCATGT	3.65751	LAM2
ACGATGTTCCTTCAAT	5.15668e-06	PLASM1
ACGCAGCAGATCTGCT	6.2646	LAM3
ACGCAGCAGGTGTTAA	5.46514	LAM2
ACGCAGCCAGATCCAT	3.24599	PLASM1
ACGCAGCTCGAACTGT	6.21198	LAM3
ACGCAGCTCTTCCTTC	2.09645	PLASM1
ACGCCAGAGAAGGACA	5.82522	LAM3
ACGCCAGAGGTTACCT	3.38137	PLASM1
ACGCCAGCAACTGCGC	5.64702	LAM2
ACGCCAGGTCGTGGCT	6.39542	LAM3
ACGCCAGGTGTAAGTA	5.22248	LAM2
ACGCCAGTCAGCCTAA	5.92566	PLASM1
ACGCCAGTCAGGATCT	6.106	LAM3
ACGCCGAAGATGGGTC	2.49495	PLASM1
ACGCCGAAGCTGATAA	4.37009	LAM1
ACGCCGAAGGACGAAA	9.98069e-06	PLASM1
ACGCCGAAGGATCGCA	6.19075	LAM2
ACGCCGAAGTTACCCA	2.99083	LAM1
ACGCCGACAGGTGGAT	2.59948	LAM1
ACGCCGACATCTCCCA	3.45552	PLASM1
ACGCCGAGTGTGCGTC	6.48111	LAM2
ACGCCGATCTATCGCC	2.58376	PLASM1
ACGGAGAAGGTGACCA	3.65739	LAM1
ACGGAGACAATCGAAA	5.55496	LAM2
ACGGAGACACAGACAG	6.21854	LAM3
ACGGCCACAGCTGTTA	6.07699	LAM3
ACGGCCACATTTCACT	4.51785	LAM1
ACGGCCAGTACTTCTT	3.58704	PLASM1
ACGGCCATCATGTCTT	5.98543	LAM3
ACGGCCATCGCTAGCG	5.2332	LAM2
ACGGGCTAGCCATCGC	3.94815	PLASM1
ACGGGCTAGGTGTGGT	6.13578	LAM2
ACGGGCTCAAGCCATT	5.6398	LAM2
ACGGGCTCAATGAAAC	5.23199	LAM2
ACGGGCTCACACCGCA	6.39037	LAM2
ACGGGCTGTTGGACCC	6.27073	LAM3
ACGGGCTTCCTTTCGG	2.88037	PLASM1
ACGGGCTTCGATGAGG	6.54326	LAM3
ACGGGTCCACGACTCG	3.62636	PLASM1
ACGGGTCCAGTATCTG	6.04375	LAM2
ACGGGTCGTACCATCA	4.85497	LAM2
ACGGGTCGTGCAGGTA	5.62378	LAM2
ACGTCAAAGCTGCCCA	4.63555	PLASM1
ACGTCAAAGCTGTCTA	6.42165	LAM3
ACGTCAAAGGCATGGT	4.69485	LAM2
ACGTCAACACTATCTT	6.3053	LAM2
ACGTCAACACTCGACG	1.48502	PLASM1
ACGTCAACAGGATCGA	1.99011	PLASM1
ACGTCAAGTTCTGGTA	5.6697	LAM2
ACGTCAATCCTAAGTG	6.85868	LAM2
ACGTCAATCGAGAGCA	2.54604	LAM2
ACGTCAATCGCATGGC	3.16139	PLASM1
ACGTCAATCGGCCGAT	3.3722	PLASM1
ACTATCTAGAGTGAGA	6.26957	LAM3
ACTATCTGTCGAATCT	1.96419	PLASM1
ACTATCTTCTACCTGC	5.03808	LAM2
ACTATCTTCTGGTATG	3.44314	PLASM1
ACTGAACAGAAGAAGC	2.49616	PLASM1
ACTGAACCAATAACGA	3.62239	PLASM1
ACTGAACGTATAATGG	4.95689	LAM1
ACTGAACGTCTCCCTA	5.92943	LAM2
ACTGAACGTGAGGGTT	5.66889	LAM3
ACTGAACTCTAAGCCA	6.12431	LAM2
ACTGAGTAGCGCCTCA	6.31724	LAM2
ACTGAGTGTGTGAAAT	6.19188	LAM2
ACTGAGTGTGTGGTTT	4.85335	LAM2
ACTGAGTTCTCATTCA	1.89773	PLASM1
ACTGAGTTCTTCAACT	3.11486	PLASM1
ACTGAGTTCTTGTTTG	-1.23706e-06	PLASM1
ACTGATGAGACGCACA	5.92458	LAM2
ACTGATGAGCTGATAA	5.76522	LAM2
ACTGATGCACGCCAGT	5.93235	LAM1
ACTGATGCATTCTTAC	5.89061	LAM3
ACTGATGGTAGCACGA	5.62719	LAM2
ACTGATGGTCAATACC	2.02815	PLASM1
ACTGATGGTGCACCAC	6.48039	LAM2
ACTGATGTCACCACCT	5.3883	LAM2
ACTGATGTCCATTCTA	4.45638	LAM2
ACTGCTCAGGGCACTA	6.62658	LAM2
ACTGCTCAGTGATCGG	6.43115	LAM3
ACTGCTCCAAGGTTTC	2.34058	PLASM1
ACTGCTCCACAGAGGT	5.74758	LAM2
ACTGCTCGTAGCTGCC	2.49633	LAM1
ACTGCTCGTTACCGAT	5.06267	LAM1
ACTGCTCTCGAATGCT	6.17672	LAM2
ACTGTCCAGAGCTATA	3.25008	PLASM1
ACTGTCCAGATAGCAT	5.52129	LAM2
ACTGTCCGTATTACCG	4.29694	LAM2
ACTGTCCGTGCAGGTA	6.03827	LAM3
ACTGTCCTCATGCTCC	6.35187	LAM2
ACTTACTAGAACAACT	4.90902	LAM2
ACTTACTAGGTAGCTG	2.48975	LAM2
ACTTACTAGTCGCCGT	3.73994	PLASM1
ACTTACTAGTGTGGCA	5.75	LAM2
ACTTACTCAATGAAAC	6.17413	LAM2
ACTTACTCATCTCCCA	3.85254	LAM2
ACTTACTCATTCCTGC	5.70291	LAM3
ACTTGTTCAGCTGGCT	6.19606	LAM3
ACTTGTTCAGTCCTTC	3.01163	PLASM1
ACTTGTTTCGATCCCT	5.29764	LAM2
ACTTTCAAGTACGCCC	5.61237	LAM2
ACTTTCAAGTTTGCGT	4.58809	LAM1
ACTTTCACACGGATAG	5.90292	LAM2
ACTTTCACAGCGAACA	4.61427	LAM2
ACTTTCAGTCGCGTGT	4.36474	LAM1
ACTTTCAGTGAAAGAG	3.46997	PLASM1
ACTTTCATCTGCCAGG	2.98775	LAM1
AGAATAGAGTCTTGCA	2.75169	PLASM1
AGAATAGGTAAACCTC	2.07587	PLASM1
AGACGTTAGGCAGTCA	-7.34583e-07	PLASM1
AGACGTTCAAGCCCAC	2.23673	PLASM1
AGACGTTTCATTTGGG	5.04961	LAM2
AGACGTTTCTACGAGT	5.73493	LAM1
AGAGCGAAGAGTAATC	2.55592	PLASM1
AGAGCGAAGTCGAGTG	5.56366	LAM2
AGAGCGACATATGAGA	3.4529	PLASM1
AGAGCGATCAAGGCTT	2.21464	PLASM1
AGAGCTTAGTCGAGTG	5.7859	LAM2
AGAGCTTCACCTATCC	2.16217	PLASM1
AGAGCTTCATCACAAC	2.40127	PLASM1
AGAGCTTGTACGCTGC	4.68408	LAM2
AGAGCTTTCGGAGCAA	5.82761	LAM2
AGAGCTTTCGGTGTTA	5.25704	LAM3
AGAGCTTTCGTCCGTT	2.48922	PLASM1
AGAGTGGAGCTAAGAT	5.86128	LAM2
AGAGTGGAGGCAATTA	5.59602	LAM2
AGAGTGGCAATGTAAG	5.4557	LAM2
AGAGTGGCAGCTGCAC	6.3887	LAM3
AGAGTGGGTAGAAGGA	3.22024	PLASM1
AGAGTGGGTGATGCCC	5.89678	LAM1
AGAGTGGGTTATTCTC	3.71436	LAM1
AGAGTGGTCCTCAATT	6.07979	LAM1
AGAGTGGTCTGCCAGG	5.82247	LAM2
AGATCTGAGGCCCTTG	5.16851	LAM2
AGATCTGAGGTGACCA	3.3241	LAM1
AGATCTGAGTGCTGCC	5.86065	PLASM1
AGATCTGGTGCACGAA	3.993	LAM2
AGATCTGGTGTCAATC	4.67354	LAM2
AGATCTGTCTCTTATG	3.4106	PLASM1
AGATCTGTCTTCGGTC	5.91288	LAM3
AGATTGCAGATACACA	5.23126	LAM2
AGATTGCGTCGGCACT	6.07957	LAM3
AGATTGCTCCAACCAA	4.37893	LAM2
AGATTGCTCGTGACAT	2.83949	LAM1
AGATTGCTCTCCCTGA	3.49202	PLASM1
AGCAGCCAGCTTATCG	2.64212	PLASM1
AGCAGCCCAAGTAATG	7.23341	LAM3
AGCAGCCCAATAGCAA	6.20702	LAM3
AGCAGCCCAATCAGAA	2.79403	PLASM1
AGCAGCCCACTGTGTA	-6.9056e-06	PLASM1
AGCAGCCCATAAGACA	6.08132	LAM2
AGCAGCCGTCACTGGC	6.33453	LAM3
AGCAGCCGTCCATGAT	6.31968	LAM2
AGCAGCCTCAGTTCGA	6.07585	LAM2
AGCAGCCTCTCCTATA	2.70732	PLASM1
AGCATACAGCGGATCA	5.15019	LAM2
AGCATACAGTACTTGC	3.42837	PLASM1
AGCATACCAAACAACA	6.28194	LAM3
AGCATACCACCCTATC	3.10413	LAM1
AGCATACCACTTCGAA	2.82242	LAM2
AGCATACCATGGAATA	6.51916	LAM3
AGCATACGTTATGCGT	4.52878	LAM2
AGCATACGTTTGGCGC	6.52363	LAM3
AGCCTAAAGCCTTGAT	6.8762e-06	PLASM1
AGCCTAAAGCGCTTAT	4.44512	LAM2
AGCCTAACAATCTGCA	6.39571	LAM2
AGCCTAACAATGGAAT	2.39977	PLASM1
AGCCTAAGTATTACCG	5.39381	LAM2
AGCCTAATCTTGCCGT	2.54777	PLASM1
AGCGGTCAGACAGACC	5.69605	LAM3
AGCGGTCAGCAATATG	6.12694	LAM2
AGCGGTCAGGGTTCCC	2.65608	PLASM1
AGCGGTCAGTGTTAGA	3.87699	PLASM1
AGCGGTCGTCATACTG	3.79506	PLASM1
AGCGGTCGTTTGTGTG	2.88767	PLASM1
AGCGGTCTCAGCTCTC	5.46954	LAM2
AGCGGTCTCGCAAACT	4.98765	LAM2
AGCGGTCTCTGTCTCG	4.90669e-07	PLASM1
AGCGGTCTCTTGAGGT	-5.78356e-06	PLASM1
AGCGTATAGTTTCCTT	3.99459	PLASM1
AGCGTATTCAAGGTAA	2.9311	PLASM1
AGCGTATTCATCATTC	4.31195	LAM2
AGCGTATTCCACGCAG	2.38063	PLASM1
AGCGTCGAGATGAGAG	4.39348	LAM1
AGCGTCGAGTGGAGTC	3.08206	LAM1
AGCGTCGCAATAGAGT	4.31172	PLASM1
AGCGTCGCACATGTGT	6.58192	LAM2
AGCGTCGCATGTCTCC	6.1543	LAM3
AGCTCCTAGCTAACAA	5.93571	PLASM1
AGCTCCTCAGTGGGAT	6.13196	LAM2
AGCTCCTCATCTGGTA	5.70161	LAM2
AGCTCCTGTGGTAACG	5.29429	LAM2
AGCTCCTGTTCCGGCA	6.67304	LAM3
AGCTCCTGTTCGTTGA	6.2117	LAM1
AGCTCTCCAGGCGATA	5.71596	LAM2
AGCTCTCCATTTCAGG	5.88216	LAM3
AGCTCTCGTAGTGAAT	6.11006	LAM2
AGCTCTCGTCTCGTTC	6.27806	LAM3
AGCTTGAAGTATCTCG	6.29173	LAM2
AGCTTGACAACGATGG	3.52087	PLASM1
AGCTTGACAGCCTATA	2.53014	PLASM1
AGCTTGAGTAAATGTG	5.81375	LAM2
AGCTTGAGTCGTGGCT	6.45991	LAM3
AGGCCACCAGTCAGAG	3.31216	LAM1
AGGCCACGTCCGAGTC	3.54106	PLASM1
AGGCCACGTCCTAGCG	5.563	LAM2
AGGCCACTCACGGTTA	6.18527	LAM2
AGGCCACTCCTAGAAC	1.84074	PLASM1
AGGCCGTCAGCTTCGG	7.00288	LAM2
AGGCCGTGTTATCGGT	6.12039	LAM2
AGGCCGTTCACAATGC	3.24477	PLASM1
AGGCCGTTCGCGCCAA	5.54716	LAM3
AGGGAGTAGAAACCTA	6.8835	LAM2
AGGGAGTAGGCTAGAC	6.27451	LAM2
AGGGAGTCACGTAAGG	5.77598	LAM2
AGGGAGTCAGCTATTG	2.605	PLASM1
AGGGAGTGTTTGACAC	1.42934e-05	LAM1
AGGGAGTTCACTGGGC	-8.67318e-06	PLASM1
AGGGATGAGTCTCCTC	4.38411	LAM2
AGGGATGCACCGATAT	6.71162	LAM3
AGGGATGGTGATGTCT	6.6296	LAM3
AGGGTGAAGACCGGAT	6.81533	LAM2
AGGGTGAAGAGACGAA	6.15948	LAM2
AGGGTGAAGTAGGTGC	2.298	PLASM1
AGGGTGAAGTGAACAT	1.85921	PLASM1
AGGGTGACACTCAGGC	3.12121	PLASM1
AGGGTGACAGCTCCGA	2.83605	PLASM1
AGGGTGACATGATCCA	6.10537	LAM2
AGGGTGAGTGTTCTTT	6.19519	LAM2
AGGGTGAGTTAGATGA	6.67391	LAM2
AGGTCATAGAGCTTCT	4.80454	LAM1
AGGTCATAGCTAAACA	6.61454	LAM3
AGGTCATAGGCGCTCT	6.21575	LAM3
AGGTCATCACACAGAG	4.80874	LAM2
AGGTCATGTAGGCATG	6.66444	LAM3
AGGTCATGTCACTGGC	6.08495	LAM2
AGGTCATGTCAGATAA	5.90162	LAM3
AGGTCATGTCCTCTTG	5.52496	LAM2
AGGTCATTCAACTCTT	6.24975	LAM2
AGGTCCGCATATACGC	5.73906	LAM2
AGGTCCGCATGTAGTC	6.00594	PLASM1
AGGTCCGGTACAAGTA	6.53961	LAM2
AGTAGTCAGACCTAGG	6.35657	LAM2
AGTAGTCAGGACAGCT	4.54358	LAM2
AGTAGTCCAGCTCGAC	2.46969	PLASM1
AGTAGTCGTCTCCCTA	6.31277	LAM3
AGTAGTCGTGGTCCGT	1.3495	PLASM1
AGTAGTCTCGTGGGAA	6.24046	LAM2
AGTCTTTAGACTCGGA	5.9254	LAM3
AGTCTTTAGAGGTAGA	4.60255	LAM1
AGTCTTTAGCGATATA	3.9719	LAM2
AGTCTTTAGTTTAGGA	-2.83647e-06	LAM2
AGTCTTTCAATGGATA	5.56925	LAM1
AGTCTTTCACATCCAA	3.31565	PLASM1
AGTCTTTGTCTCATCC	6.24793	LAM3
AGTGAGGAGACAGGCT	5.68821	LAM3
AGTGAGGAGCCGCCTA	2.57493	PLASM1
AGTGAGGAGGTGCACA	4.07362	PLASM1
AGTGAGGAGTGCAAGC	6.78847	LAM2
AGTGAGGCATTGAGCT	3.93218	PLASM1
AGTGAGGGTAAGTTCC	3.53486	LAM1
AGTGAGGGTCGGCTCA	5.75172	LAM2
AGTGAGGGTTCAGACT	6.10804	LAM2
AGTGAGGGTTCGGCAC	3.78076	LAM1
AGTGAGGTCATGCAAC	3.72112	LAM2
AGTGAGGTCGCTTGTC	2.20439	PLASM1
AGTGGGAAGAGTACAT	6.28271	LAM3
AGTGGGACACCAACCG	6.66054	PLASM1
AGTGGGAGTCCAGTTA	5.89899	LAM2
AGTGGGAGTCTCACCT	6.35046	LAM2
AGTGTCAAGTACGCGA	6.22324	LAM3
AGTGTCAGTAAGAGGA	3.40264	PLASM1
AGTGTCAGTGTTTGTG	4.48422	LAM1
AGTGTCAGTTAAAGAC	6.3156	LAM3
AGTGTCAGTTCCATGA	4.98133	LAM2
AGTGTCATCACAGTAC	5.87277	LAM2
AGTGTCATCGCCTGTT	6.08812	LAM2
AGTTGGTAGACGACGT	1.3601e-06	PLASM1
AGTTGGTCATAGAAAC	3.37524	PLASM1
AGTTGGTGTAGCCTCG	6.32688	LAM2
AGTTGGTGTCGCCATG	5.03443	PLASM1
AGTTGGTGTTACGTCA	3.51856	PLASM1
AGTTGGTGTTAGATGA	6.02919	LAM1
ATAACGCAGCGATCCC	2.0764	LAM2
ATAACGCCAGCGAACA	2.41693	LAM1
ATAACGCCAGGTCGTC	3.72388	LAM1
ATAACGCGTCACTGGC	-1.12898e-05	PLASM1
ATAACGCGTCATTAGC	2.22848	PLASM1
ATAACGCTCAGGTAAA	6.46792	LAM3
ATAAGAGAGCTGTCTA	2.15365	PLASM1
ATAAGAGAGTGGCACA	6.51006	LAM2
ATAAGAGCACCTCGTT	1.9837	PLASM1
ATAAGAGGTCAGAATA	6.53016	LAM3
ATAAGAGTCACAACGT	2.99521	LAM2
ATAGACCAGCCAGTTT	5.85616	LAM2
ATAGACCAGCTACCGC	3.35464	PLASM1
ATAGACCAGGTAAACT	3.2448	PLASM1
ATAGACCGTAGGGACT	6.3012	LAM3
ATCACGAAGATCGGGT	4.13095	LAM1
ATCACGAGTCTAGCCG	5.1517	LAM2
ATCACGAGTGAGGCTA	6.35798	LAM2
ATCACGAGTTTAAGCC	4.79886	LAM1
ATCACGATCGAGAACG	5.48082	LAM3
ATCACGATCGCTTGTC	2.63025	PLASM1
ATCATCTAGCTGGAAC	5.64744	LAM1
ATCATCTAGGCTAGAC	-1.12182e-05	PLASM1
ATCATCTGTAGGGTAC	3.2841	PLASM1
ATCATCTGTCTCCCTA	6.77117	LAM1
ATCATCTGTGCCTGGT	5.9038	LAM3
ATCATCTTCAGCGATT	6.09829	LAM3
ATCATCTTCAGTCAGT	2.21012	LAM1
ATCATCTTCCTCCTAG	3.73871	LAM1
ATCATCTTCGTACGGC	5.95624	LAM2
ATCATGGAGACTAAGT	6.19364	LAM2
ATCATGGAGGAGCGAG	5.59374	LAM2
ATCATGGAGTTAGCGG	2.22625	PLASM1
ATCATGGCAGGACCCT	6.12061	LAM2
ATCATGGCATACAGCT	6.1318	LAM3
ATCATGGCATCGGAAG	5.99108	LAM3
ATCATGGGTTCTGTTT	6.03977	LAM2
ATCATGGTCATTTGGG	7.63097e-06	PLASM1
ATCATGGTCTTACCTA	6.54774	LAM2
ATCCACCAGAGCAATT	5.9826	LAM1
ATCCACCAGATGTGTA	6.47248	LAM3
ATCCACCAGTAGCCGA	5.88329	LAM3
ATCCACCCAACGCACC	5.30181	LAM2
ATCCACCCACCTCGTT	4.34759	LAM1
ATCCACCCACGGTAAG	6.90497	LAM2
ATCCACCCAGCCTTGG	4.19902	LAM2
ATCCACCCAGTAAGCG	3.06556	PLASM1
ATCCACCGTCCTCTTG	5.83113	LAM3
ATCCACCTCCTCCTAG	3.07826	PLASM1
ATCCACCTCCTTAATC	5.18447	LAM2
ATCCGAAAGATGCCTT	5.30669	LAM1
ATCCGAAAGCGTGAGT	5.82696	LAM2
ATCCGAAAGGTGGGTT	5.2981	LAM1
ATCCGAACAGACAAGC	1.88887	LAM1
ATCCGAAGTAGAAGGA	4.68959	LAM2
ATCCGAAGTGCAGACA	4.72704	LAM1
ATCCGAATCCAAACTG	5.59672	LAM2
ATCGAGTCAAACGCGA	5.78929	LAM2
ATCGAGTGTTCACCTC	6.35918	LAM3
ATCTACTAGAGCTTCT	6.01998	LAM2
ATCTACTAGCGATCCC	5.41399	LAM2
ATCTACTCACTGTTAG	3.99486	LAM1
ATCTACTGTCTCCATC	5.94684	LAM2
ATCTACTGTTACCAGT	-9.31305e-06	PLASM1
ATCTACTTCTCAAACG	4.82081	LAM2
ATCTGCCAGAGCTTCT	5.36664	LAM2
ATCTGCCCACCGAAAG	2.91585	PLASM1
ATCTGCCGTAGCCTAT	2.05957	PLASM1
ATCTGCCTCTACTCAT	4.81011	LAM1
ATCTGCCTCTGCCCTA	4.20869	LAM1
ATGAGGGGTCGCCATG	6.25814	LAM2
ATGAGGGGTCTCATCC	2.69754	PLASM1
ATGAGGGGTGCTCTTC	-4.34898e-06	LAM1
ATGAGGGTCAACACTG	2.92652	PLASM1
ATGAGGGTCGGCGCTA	5.74771	LAM3
ATGCGATAGTGTTTGC	5.48099	LAM2
ATGCGATCAGCCAATT	-1.45965e-05	PLASM1
ATGCGATCATCCGTGG	5.69142	LAM2
ATGCGATGTCGAACAG	6.14406	LAM2
ATGCGATGTTAAAGAC	6.37264	LAM2
ATGCGATGTTTCGCTC	6.53773	LAM3
ATGCGATTCAGGCCCA	5.85627	LAM2
ATGCGATTCGAGAGCA	3.61902	LAM2
ATGGGAGAGCTGCAAG	5.94914	LAM2
ATGGGAGAGTTTCCTT	5.31394	LAM2
ATGGGAGCAATTGCTG	6.11047	LAM3
ATGGGAGCATGACGGA	3.44218	PLASM1
ATGGGAGGTCGCATCG	2.14098	PLASM1
ATGTGTGAGGCATTGG	5.73785	LAM2
ATGTGTGCAACTTGAC	6.24173	LAM2
ATGTGTGGTATTCTCT	1.96202	PLASM1
ATGTGTGGTCGAACAG	1.95921	PLASM1
ATGTGTGTCCAAAGTC	5.37559	LAM1
ATTACTCAGACTTTCG	6.61936	LAM3
ATTACTCCAAACAACA	6.51521	LAM2
ATTACTCCAGCTCGAC	5.82784	LAM3
ATTACTCGTAGGCTGA	5.48554	PLASM1
ATTACTCGTGCAGTAG	5.6074	LAM2
ATTACTCTCATGTCTT	4.8297	LAM2
ATTACTCTCCGCGGTA	4.97561	LAM2
ATTACTCTCGTAGGTT	6.25837	LAM2
ATTACTCTCTGCAGTA	6.60319	LAM3
ATTACTCTCTTGTACT	6.72257	LAM2
ATTATCCAGTCAATAG	6.51451	LAM2
ATTATCCCAGATGGCA	6.18784	LAM2
ATTATCCGTGACCAAG	5.58121	LAM2
ATTCTACCATGCCTTC	6.52264	LAM2
ATTCTACGTACGAAAT	3.05995	PLASM1
ATTCTACGTGTCCTCT	2.27994	PLASM1
ATTCTACGTGTGACCC	2.87167	PLASM1
ATTCTACTCATCGGAT	4.91227	LAM2
ATTGGACAGAGTAAGG	5.60178	LAM2
ATTGGACAGATATGCA	5.55335	LAM2
ATTGGACCATGGGAAC	3.82471	PLASM1
ATTGGACGTGTTTGGT	5.78936	LAM2
ATTGGACTCACAATGC	6.30256	LAM2
ATTGGACTCCCTAATT	5.81143	LAM2
ATTGGACTCTGCTTGC	5.96382	LAM2
ATTGGACTCTTTCCTC	6.10011	LAM1
ATTGGTGAGTAGATGT	5.97208	LAM2
ATTGGTGCACATCCGG	3.74781	LAM1
ATTGGTGCACGGTTTA	6.77398	LAM2
ATTGGTGGTACGCACC	6.42095	LAM3
ATTGGTGTCACTTACT	3.02825	PLASM1
ATTTCTGCAATGGAAT	2.59828	PLASM1
ATTTCTGCATCCGCGA	6.14252	LAM3
ATTTCTGGTCCAACTA	-6.61991e-06	LAM2
ATTTCTGGTTTGGCGC	6.34965	LAM2
ATTTCTGTCTGCGTAA	4.60995	LAM2
CAACCAAAGATCGATA	2.18283	PLASM1
CAACCAACATGCTAGT	5.29913	LAM1
CAACCAAGTCTCCCTA	5.69279	LAM2
CAACCAAGTGGCAAAC	2.73982	PLASM1
CAACCAATCACATGCA	1.5861	PLASM1
CAACCTCAGAGTGAGA	5.88488	LAM2
CAACCTCAGTTTAGGA	2.64751	PLASM1
CAACCTCCAGAAGCAC	4.79347	LAM2
CAACCTCCATCGGAAG	5.90858	LAM2
CAACCTCTCTCATTCA	2.53111	PLASM1
CAACCTCTCTCGGACG	3.13856	PLASM1
CAACTAGCACAGGCCT	5.56504	LAM2
CAACTAGCACATAACC	2.47454	PLASM1
CAACTAGCAGACGCTC	6.24579	LAM2
CAACTAGGTCTAGGTT	3.9686	LAM1
CAACTAGGTTCCGTCT	4.43024	LAM1
CAACTAGTCACAGTAC	1.99559	PLASM1
CAAGAAAAGACACTAA	5.54936	LAM3
CAAGAAAAGCCTTGAT	5.57349	LAM3
CAAGAAAAGTGGTCCC	5.77568	LAM1
CAAGAAACAATGGACG	5.84994	LAM2
CAAGAAACAGCTCGAC	3.1064	PLASM1
CAAGAAACAGCTGGCT	-5.99182e-06	PLASM1
CAAGAAACAGTCAGAG	1.25691e-05	PLASM1
CAAGAAACATCTCGCT	2.88713	PLASM1
CAAGAAATCAGATAAG	6.04298	LAM3
CAAGAAATCAGGCGAA	1.91667	PLASM1
CAAGAAATCATGTAGC	2.06356	PLASM1
CAAGAAATCCCTCAGT	6.27718	LAM2
CAAGATCCAATCGAAA	4.89974	LAM2
CAAGATCGTCAACTGT	5.40204	LAM2
CAAGATCGTTAAGAAC	6.85135	LAM3
CAAGGCCAGATCGGGT	6.43504	LAM2
CAAGGCCAGCCTATGT	4.9542	LAM2
CAAGGCCAGCTGAACG	6.52051	LAM3
CAAGGCCCAGATGAGC	5.77818	LAM2
CAAGGCCCAGCGTTCG	6.12508	LAM2
CAAGGCCCATCAGTAC	2.93358	PLASM1
CAAGGCCGTCGTGGCT	5.44394	LAM2
CAAGGCCTCGATGAGG	6.18188	LAM2
CAAGGCCTCTAACTCT	2.94783	PLASM1
CAAGTTGAGAGACGAA	2.28159	PLASM1
CAAGTTGAGCGTGTCC	2.98689	LAM2
CAAGTTGCAAGTTCTG	5.3067	LAM2
CAAGTTGGTAGGCATG	6.17006	LAM2
CAAGTTGGTGGCGAAT	2.57241	PLASM1
CAAGTTGGTTATCCGA	5.72544	LAM2
CAAGTTGTCACCTCGT	6.38283	LAM2
CACAAACAGAACAATC	-5.75057e-06	PLASM1
CACAAACAGCTAGCCC	5.88498	LAM2
CACAAACCAGTCTTCC	4.56627	LAM2
CACAAACCATCTATGG	6.5473	LAM3
CACAAACGTCTTGATG	5.61174	LAM3
CACACAAAGAGGGCTT	6.39475	LAM2
CACACAAAGCTTATCG	4.2875	LAM1
CACACAACAACAACCT	6.19381	LAM2
CACACAACAAGGACTG	5.18361	LAM2
CACACAACAATGAATG	5.95954	LAM3
CACACAACAATGGACG	2.86813	PLASM1
CACACAATCCATTCTA	-2.19279e-05	LAM1
CACACCTAGGAGCGAG	2.18343	PLASM1
CACACCTCACGTAAGG	5.64258	LAM2
CACACCTCATGAACCT	2.55242	PLASM1
CACACCTGTCATGCAT	6.06871	LAM2
CACACCTTCGAGAACG	6.26377	LAM3
CACACTCAGCCGCCTA	2.9097	PLASM1
CACACTCCAAGCCGCT	6.57177	LAM3
CACACTCCATCCGCGA	3.62501	LAM2
CACACTCGTGACGGTA	6.3187	LAM2
CACACTCGTGCTGTAT	3.10477	PLASM1
CACACTCGTTATGTGC	6.41477	LAM2
CACACTCTCAGCAACT	6.24308	LAM3
CACACTCTCCCAAGAT	1.55096	PLASM1
CACAGGCAGATAGCAT	3.64092	PLASM1
CACAGGCAGCTCCTTC	5.23775	LAM2
CACAGGCAGGCTAGGT	3.59458	LAM2
CACAGGCAGTTTCCTT	6.0075	LAM2
CACAGGCCAAAGCAAT	3.42071	PLASM1
CACAGGCCAATAACGA	5.0161	LAM2
CACAGGCCAATGGACG	5.61899	LAM2
CACAGGCCATGGGACA	5.93956	LAM2
CACAGGCGTACTTCTT	4.95093	LAM2
CACAGGCGTCGATTGT	2.63484	PLASM1
CACAGGCGTCTAGCGC	1.46651e-05	PLASM1
CACAGGCGTGGTTTCA	6.46812	LAM3
CACAGGCTCCCAACGG	3.54926	PLASM1
CACAGGCTCTCGGACG	6.21128	LAM2
CACAGTAAGTACGTTC	6.34604	LAM3
CACAGTAGTGGAAAGA	6.63877e-06	PLASM1
CACAGTAGTGGTACAG	6.90011	LAM3
CACAGTATCAGTGTTG	3.93282	LAM1
CACAGTATCATTGCGA	-7.4613e-06	PLASM1
CACAGTATCATTTGGG	3.51788	PLASM1
CACATAGAGAATTCCC	3.33027	PLASM1
CACATAGAGCGGATCA	6.37104	LAM2
CACATAGAGGACGAAA	6.36863	LAM2
CACATAGAGTGCGTGA	6.34638	LAM3
CACATAGAGTGTGGCA	7.4136e-06	PLASM1
CACATAGCACAGTCGC	6.41925	LAM3
CACATAGCACTGCCAG	5.11359	LAM2
CACATAGGTCTTGTCC	5.17661	LAM1
CACATAGGTGACGCCT	6.43999	LAM2
CACATAGTCCTCCTAG	5.141	LAM2
CACATTTAGAGGTTAT	6.64615	LAM2
CACATTTCACGTCAGC	5.001	LAM2
CACATTTGTGCTGTAT	3.80195	PLASM1
CACATTTTCCAAACTG	6.08594	LAM1
CACCACTAGAAACGAG	6.28908	LAM3
CACCACTCAATTCCTT	4.0421	PLASM1
CACCACTCAATTGCTG	4.54166	LAM1
CACCACTCACCGTTGG	1.06997	PLASM1
CACCACTGTAAAGTCA	6.64333	LAM2
CACCACTGTCAAAGCG	4.74413	LAM2
CACCACTGTGACGCCT	5.33991	LAM2
CACCACTGTGGCAAAC	2.51525	LAM2
CACCACTTCACAATGC	6.27159	LAM2
CACCACTTCCCAGGTG	6.04512	LAM3
CACCACTTCCGCAGTG	3.42978	PLASM1
CACCACTTCCTGCCAT	5.44629	LAM2
CACCACTTCGCGCCAA	1.29474e-05	PLASM1
CACCAGGAGAGCTTCT	5.72148	LAM2
CACCAGGCACCGCTAG	2.41844	PLASM1
CACCAGGCACCTTGTC	4.03897	LAM1
CACCAGGGTGTGCGTC	6.37882	LAM2
CACCAGGTCGCCTGTT	3.23915	PLASM1
CACCTTGAGTCATCCA	3.50555	PLASM1
CACCTTGCAAGCGCTC	2.36007	PLASM1
CACCTTGCATCGGTTA	4.97842	LAM2
CACCTTGCATCTACGA	3.44941	PLASM1
CACCTTGTCCCTGACT	6.84865	LAM2
CACCTTGTCCTTCAAT	3.51856	PLASM1
CACTCCAAGATGTCGG	5.58648	LAM2
CACTCCAAGTTCCACA	5.91699	LAM3
CACTCCACAAGGTGTG	6.56891	LAM3
CACTCCACACACCGAC	2.41579	PLASM1
CACTCCACACCAGCAC	5.66536	LAM1
CACTCCAGTAGCTCCG	5.85697	LAM3
CACTCCAGTCGTTGTA	6.27492	LAM3
CACTCCAGTGATGATA	4.82651	LAM2
CACTCCAGTGTGAATA	6.57102	LAM2
CAGAATCAGGAGTTTA	3.19166	PLASM1
CAGAATCAGTCCCACG	6.22315	LAM3
CAGAATCAGTTCGCGC	2.86539	PLASM1
CAGAATCCACGTCAGC	2.86579	LAM2
CAGAATCGTACAGTGG	5.85705	LAM2
CAGAATCTCCACTGGG	5.92326	LAM1
CAGAGAGAGATCGGGT	3.81826	LAM2
CAGAGAGAGTTGCAGG	5.56011	LAM2
CAGAGAGCATTGCGGC	5.06566	PLASM1
CAGATCAAGTCTCCTC	2.42253	PLASM1
CAGATCACAAGCCATT	5.56955	LAM2
CAGATCACACATCTTT	1.86638e-05	PLASM1
CAGATCACATCACGTA	6.54912	LAM3
CAGATCACATGCCTAA	4.71936	LAM2
CAGATCAGTCACTGGC	4.83042	LAM2
CAGATCAGTCTGCCAG	5.7209	LAM2
CAGATCATCGTAGGAG	6.53845	LAM3
CAGCAGCAGCACAGGT	5.78372	LAM3
CAGCAGCCACGCGAAA	6.58731	LAM2
CAGCAGCCATCCTAGA	2.01318	PLASM1
CAGCAGCGTATGGTTC	1.14109e-06	PLASM1
CAGCAGCGTCGAAAGC	-1.0333e-05	PLASM1
CAGCAGCTCAGCGATT	6.88808e-06	PLASM1
CAGCAGCTCCACGAAT	5.8318	LAM2
CAGCAGCTCGTGTAGT	5.30336	LAM3
CAGCATAAGTAATCCC	3.97522	LAM2
CAGCATACACGAAGCA	3.40056	PLASM1
CAGCATAGTCGAACAG	2.73931	PLASM1
CAGCATATCCTTTCGG	5.64727	LAM2
CAGCATATCTTGTCAT	7.46155	LAM3
CAGCCGAAGAAGGCCT	1.30863e-05	PLASM1
CAGCCGAAGACCTAGG	2.59767	PLASM1
CAGCCGAAGCAATATG	3.98453	LAM2
CAGCCGAAGGATGGTC	2.92366	PLASM1
CAGCCGAAGTTAACGA	2.99963	PLASM1
CAGCCGACACAAGTAA	4.05589	LAM2
CAGCCGAGTGCAACTT	3.84558	PLASM1
CAGCCGATCCAAATGC	-9.54586e-06	LAM1
CAGCGACAGATGGGTC	3.27921	LAM2
CAGCGACAGGGAAACA	4.28836	LAM2
CAGCGACAGGTCATCT	6.64176	LAM3
CAGCGACCAAGCTGAG	5.97471	LAM3
CAGCGACCAGGAACGT	2.97427	PLASM1
CAGCGACGTAGCGTGA	5.39236	LAM2
CAGCGACGTATCGCAT	3.88824	PLASM1
CAGCGACGTCAATGTC	5.25925	LAM2
CAGCGACTCAGTGCAT	6.43674	LAM2
CAGCGACTCATGTCCC	5.09456	LAM1
CAGCGACTCCTCTAGC	5.65601	LAM1
CAGCGACTCGCCAAAT	5.8631	LAM2
CAGCGACTCTCCAACC	6.13192	LAM3
CAGCGACTCTGATACG	6.18176	LAM3
CAGCGACTCTGGTATG	6.1242	LAM3
CAGCTAAAGGCTATCT	5.84603	LAM2
CAGCTAAAGTGAACGC	5.53287	LAM2
CAGCTAAAGTGTCCAT	5.89682	LAM1
CAGCTAACACTGCCAG	6.91256	LAM2
CAGCTAAGTATGAAAC	3.21241	PLASM1
CAGCTAATCCTGCTTG	2.56061	PLASM1
CAGCTAATCTGTACGA	1.74423	PLASM1
CAGCTGGAGACGCTTT	9.44775e-06	PLASM1
CAGCTGGAGCGTGAAC	5.16501	LAM2
CAGCTGGCACATCCGG	7.23903e-06	PLASM1
CAGCTGGCAGGCAGTA	5.76524	LAM2
CAGCTGGGTCAGAATA	2.46273	PLASM1
CAGCTGGGTCGCGGTT	6.50054	LAM2
CAGCTGGGTCTGGTCG	4.15664	LAM1
CAGCTGGTCACGACTA	4.44344	PLASM1
CAGCTGGTCAGTTCGA	5.86367	LAM1
CAGCTGGTCGCACTCT	2.36342	PLASM1
CAGCTGGTCGTACCGG	2.38144	PLASM1
CAGGTGCAGTGTTAGA	5.25586	LAM3
CAGGTGCCACAGGAGT	3.36489	PLASM1
CAGGTGCCACTGTCGG	3.15794	PLASM1
CAGGTGCGTCAATGTC	3.4864	LAM1
CAGGTGCGTCTTCGTC	2.15381	PLASM1
CAGGTGCGTTATCCGA	5.33973	LAM1
CAGTAACAGAAGGTGA	-3.2295e-06	LAM1
CAGTAACAGCACGCCT	5.91778	PLASM1
CAGTAACAGCCGGTAA	5.99278	LAM2
CAGTAACAGCTACCGC	5.89181	LAM3
CAGTAACCAAGCTGGA	-5.09765e-06	PLASM1
CAGTAACCAATAGAGT	4.55287	LAM1
CAGTAACGTACTTCTT	3.46108	PLASM1
CAGTAACTCTACCTGC	5.4148	LAM3
CAGTAACTCTACGAGT	6.8738	LAM3
CAGTAACTCTCTTGAT	6.22393	LAM1
CAGTCCTCAGCCTTTC	5.27003	LAM2
CAGTCCTCATCACGAT	6.31557	LAM3
CAGTCCTCATCATCCC	3.8548	LAM1
CAGTCCTGTAAGTGTA	3.08841	PLASM1
CAGTCCTGTCATCGGC	6.14754	LAM3
CAGTCCTGTCGAACAG	2.64053	PLASM1
CAGTCCTGTCTTGTCC	3.61977	LAM1
CAGTCCTTCCCAAGTA	2.66556	PLASM1
CAGTCCTTCGAGAACG	2.02547	PLASM1
CAGTCCTTCGTAGGTT	3.0665	LAM2
CAGTCCTTCTGCGTAA	6.40057	LAM3
CATATGGCATGCCTTC	3.28807	PLASM1
CATATGGTCGGAATCT	5.812	LAM2
CATATTCAGCTTATCG	2.26677	PLASM1
CATATTCCAACGATGG	5.60809	LAM2
CATATTCGTAGGCTGA	6.86428	LAM3
CATATTCTCGGAAACG	6.31512	LAM1
CATCAAGCAGGAATCG	3.99757	PLASM1
CATCAAGCAGTTAACC	3.28297	PLASM1
CATCAAGCATGAAGTA	3.80166	PLASM1
CATCAAGGTAGCAAAT	3.78774	LAM1
CATCAAGGTTTAGCTG	2.33964	PLASM1
CATCAAGTCCCTAACC	5.97267	LAM3
CATCAGAAGTTGTCGT	2.94587	LAM2
CATCAGACAAGGACTG	5.09225	LAM2
CATCAGACAGTCGTGC	3.10268	PLASM1
CATCAGACATTGTGCA	4.44733	LAM1
CATCAGAGTAAGGATT	-2.20655e-06	PLASM1
CATCAGAGTCTTTCAT	5.89824	LAM2
CATCCACAGAGTGACC	2.44477	PLASM1
CATCCACAGCTAGCCC	6.79399	LAM3
CATCCACGTCCGTTAA	6.29613	LAM2
CATCCACGTGCGAAAC	6.13434	LAM2
CATCCACTCGTGTAGT	5.73315	LAM2
CATCCACTCTTTACAC	6.06805	PLASM1
CATCGAAAGCACACAG	5.127	LAM2
CATCGAAAGGTGCAAC	5.94994	LAM2
CATCGAACACAGGTTT	4.55375	LAM2
CATCGAACACGGTGTC	3.24562	PLASM1
CATCGAACAGCGTCCA	2.59829	PLASM1
CATCGAACATAAGACA	3.39307	LAM2
CATCGAAGTTAAGACA	3.32089	PLASM1
CATCGAAGTTCGTGAT	4.94354	LAM1
CATCGAATCACGACTA	6.64351	LAM3
CATCGAATCCTTAATC	6.30155	LAM3
CATCGAATCTGCTGTC	5.67653	LAM3
CATCGGGAGAAGGTGA	2.2672	PLASM1
CATCGGGAGCGCTCCA	6.22045	LAM3
CATCGGGAGTGGTAGC	6.8826	LAM2
CATCGGGCATGCCTTC	4.563	LAM2
CATCGGGGTATGAATG	6.0466	LAM3
CATCGGGGTGTCGCTG	2.37507	PLASM1
CATCGGGGTTGACGTT	6.91535	LAM1
CATCGGGTCTATGTGG	2.72217e-06	PLASM1
CATGACAAGTGGTCCC	6.79969	LAM3
CATGACACACAGTCGC	4.84159	LAM1
CATGACAGTAGTAGTA	2.4713	PLASM1
CATGACAGTCCGAAGA	2.60835	PLASM1
CATGACAGTCGCATAT	3.63914	PLASM1
CATGACAGTCTTCGTC	6.02283	LAM2
CATGACAGTTAAGACA	4.88192	LAM3
CATGACAGTTGATTGC	5.99839	LAM3
CATGCCTAGCGACGTA	5.46369	LAM2
CATGCCTAGGCTCATT	5.69775	LAM2
CATGCCTCACAAGACG	3.26531	PLASM1
CATGCCTCATGTAAGA	5.31097	LAM1
CATGCCTGTACCGAGA	5.92349	LAM2
CATGCCTTCGCCTGTT	5.34027	LAM1
CATGGCGAGAGCTATA	3.78246	LAM1
CATGGCGAGTTTAGGA	2.42151	PLASM1
CATGGCGCAGCTGTAT	5.09306	LAM2
CATGGCGCATTTCACT	6.41798	LAM3
CATGGCGGTGGTACAG	2.37264	PLASM1
CATGGCGGTGTTCTTT	6.07243	LAM2
CATGGCGTCTCCAGGG	6.47468	LAM3
CATTATCAGCCGATTT	3.25008	LAM2
CATTATCCAAAGTCAA	5.73018	LAM2
CATTATCTCGGTCTAA	1.55226	PLASM1
CATTCGCAGAAGGTGA	2.59685	PLASM1
CATTCGCAGCGAAGGG	3.28795	PLASM1
CATTCGCAGGGCATGT	6.4003	LAM2
CATTCGCCAGTTTACG	4.0218	LAM2
CATTCGCGTTCCATGA	4.28967	LAM2
CATTCGCTCTGAGGGA	6.12828	LAM2
CCAATCCAGACCACGA	6.46832	LAM2
CCAATCCAGTACCGGA	6.33336	LAM2
CCAATCCAGTCCGTAT	4.79784	LAM1
CCAATCCCACAGGAGT	2.35766	PLASM1
CCAATCCGTCACAAGG	3.36126	PLASM1
CCAATCCGTGATGCCC	-9.14455e-06	PLASM1
CCAATCCTCTTGCAAG	6.14585	LAM2
CCACCTAAGAGGGATA	2.02181	PLASM1
CCACCTAAGCGTTGCC	6.30441	LAM3
CCACCTAAGGGCTTCC	3.56157	PLASM1
CCACCTACAATGGACG	6.12483	PLASM1
CCACCTACACGCTTTC	9.39801e-06	LAM2
CCACCTACAGGAATGC	6.74796	LAM3
CCACCTACATGCTGGC	6.82561	LAM2
CCACCTATCCGTTGTC	3.36853	PLASM1
CCACCTATCCTAGTGA	5.31215	LAM2
CCACGGAAGCCAGTTT	5.88607	LAM2
CCACGGAAGCGAGAAA	5.558	LAM2
CCACGGAAGGTGATAT	3.88387	LAM1
CCACGGACACTTCGAA	2.93275	PLASM1
CCACGGACATCCGGGT	1.41913e-05	PLASM1
CCACGGACATGACGGA	6.22744	LAM2
CCACTACAGCACCGCT	2.15323	PLASM1
CCACTACCAAGGTGTG	5.88606	LAM2
CCACTACCATATGAGA	2.53569	PLASM1
CCACTACGTAACGCGA	2.47079	PLASM1
CCACTACGTCCGAAGA	5.32821e-06	PLASM1
CCACTACTCCAGGGCT	5.91468	LAM2
CCAGCGACACCGGAAA	5.32602	LAM1
CCAGCGAGTGCCTGGT	3.94962	PLASM1
CCAGCGATCAGTGCAT	5.79814	LAM2
CCATGTCCAAGTAGTA	5.8457	LAM1
CCATGTCCATACTACG	5.75316	LAM2
CCATGTCTCACCACCT	6.35048	LAM2
CCATGTCTCCTATTCA	5.83284	LAM2
CCATTCGCATACTCTT	5.38973	LAM3
CCATTCGGTACAGACG	4.60788	LAM1
CCATTCGGTCATGCCG	5.93418	LAM2
CCATTCGGTCGTTGTA	5.69103	LAM2
CCATTCGGTTGGTGGA	9.15592e-06	PLASM1
CCATTCGTCAGGATCT	5.99581	LAM3
CCATTCGTCCTGTAGA	7.63825e-06	PLASM1
CCCAATCAGTTTGCGT	-6.03387e-06	PLASM1
CCCAATCGTCCCTACT	5.88428	LAM2
CCCAATCGTGTAATGA	2.27773	PLASM1
CCCAGTTAGAACAACT	3.79219	PLASM1
CCCAGTTAGTGCGTGA	5.59976	LAM2
CCCAGTTCACGGACAA	5.27338	LAM2
CCCAGTTGTAAGTGGC	3.12172	LAM2
CCCAGTTGTGGTGTAG	6.20097	LAM3
CCCAGTTTCAGTCCCT	6.38806	LAM3
CCCAGTTTCTTGTACT	4.40859	LAM1
CCCATACAGACGACGT	3.12565	PLASM1
CCCATACCAGAGCCAA	2.56297	PLASM1
CCCATACCATGACATC	6.50335	LAM2
CCCATACGTACAAGTA	2.86483	PLASM1
CCCATACGTGTTCGAT	6.63335	LAM2
CCCATACGTGTTGAGG	5.61086	LAM2
CCCATACGTTCTGAAC	5.92133	LAM3
CCCTCCTAGTGTGAAT	5.21455	LAM1
CCCTCCTCACACCGCA	4.23732	LAM1
CCCTCCTGTACGCACC	2.32795	PLASM1
CCCTCCTGTGCGATAG	5.99684	LAM2
CCCTCCTTCGTCCAGG	2.63421	PLASM1
CCCTCCTTCTGCGTAA	-5.44355e-06	PLASM1
CCCTCCTTCTTTAGTC	5.94834	LAM2
CCGGGATCAGGTTTCA	6.08154	LAM2
CCGGGATGTCAACTGT	1.73759	PLASM1
CCGGGATTCAGGATCT	6.01877	LAM2
CCGGGATTCCGCGGTA	2.4274	PLASM1
CCGGTAGAGCTACCTA	3.26428	PLASM1
CCGGTAGAGGGCTTCC	2.57065	PLASM1
CCGGTAGCACATGGGA	5.33706	LAM2
CCGGTAGCACTAGTAC	6.44002	LAM2
CCGGTAGCAGTGGAGT	6.04299	LAM2
CCGGTAGCATGTAGTC	6.42455	LAM3
CCGGTAGGTACACCGC	3.88439e-06	PLASM1
CCGGTAGGTATTAGCC	5.60681	LAM2
CCGGTAGGTCGTCTTC	6.64854	LAM2
CCGGTAGGTTACCAGT	6.08742	LAM2
CCGGTAGGTTTGACTG	6.32486	LAM2
CCGTACTCAGCTCGCA	3.85691	LAM2
CCGTACTCATGCTGGC	3.98121	PLASM1
CCGTACTGTTGCCTCT	5.30679	LAM2
CCGTACTTCGGTTCGG	5.71844	LAM2
CCGTACTTCTCTGCTG	-5.28644e-06	PLASM1
CCGTGGAAGCGTCTAT	2.04405	PLASM1
CCGTGGAAGGGTTCCC	1.62016e-05	PLASM1
CCGTGGAAGGTCGGAT	-1.78951e-07	PLASM1
CCGTGGAAGGTGATAT	4.76946	LAM1
CCGTGGAAGTCTCCTC	2.64115	PLASM1
CCGTGGAGTGACAAAT	4.86283	LAM2
CCGTGGATCCTTGCCA	4.78771	LAM2
CCGTGGATCGGCGCTA	5.96102	LAM3
CCGTGGATCGTTACGA	5.96485	LAM3
CCGTGGATCGTTTAGG	6.69066e-06	PLASM1
CCGTTCAGTCTAAAGA	3.66513	PLASM1
CCGTTCAGTCTACCTC	6.03194	LAM2
CCGTTCATCCCAGGTG	5.06799	LAM2
CCGTTCATCTCTTATG	3.66732	PLASM1
CCTAAAGAGTATCTCG	6.29853	LAM2
CCTAAAGCAGACACTT	5.42231	LAM2
CCTAAAGTCAGTACGT	3.71977	PLASM1
CCTAAAGTCTTAGAGC	6.78114	LAM2
CCTACACCAAACAACA	3.27453	PLASM1
CCTACACCACATTTCT	2.42407	PLASM1
CCTACACGTTTCGCTC	5.93149	LAM2
CCTACACTCCTTTCGG	4.95961e-06	PLASM1
CCTACCACACACCGCA	1.66189e-05	PLASM1
CCTACCACAGATGGGT	4.2536	LAM2
CCTACCATCAGTTCGA	6.14351	LAM2
CCTACCATCGGCCGAT	4.23521	LAM2
CCTACCATCTCTTGAT	4.18973	LAM1
CCTACCATCTTACCGC	5.52286	LAM2
CCTAGCTAGAAACGAG	3.78502	PLASM1
CCTAGCTAGTACGATA	2.09569	PLASM1
CCTAGCTCACGTTGGC	3.45943	PLASM1
CCTAGCTGTACCGTTA	4.13832e-07	PLASM1
CCTAGCTTCGTTGCCT	2.52313	PLASM1
CCTATTAAGATATGCA	6.35514	LAM3
CCTATTAAGTGGGCTA	5.62568	LAM1
CCTATTACAAGCTGGA	3.64321	PLASM1
CCTATTACACCAGGTC	5.26828	LAM2
CCTATTAGTAAACGCG	6.38135	LAM2
CCTATTAGTAGGAGTC	6.4732	LAM2
CCTATTAGTCTAGAGG	5.5029	LAM2
CCTCAGTCAACACCCG	5.59366	LAM2
CCTCAGTCACGAAGCA	5.81161	LAM2
CCTCAGTCATAAAGGT	4.07104	PLASM1
CCTCAGTTCACAAACC	2.28479	LAM2
CCTCTGAAGATGTAAC	6.36734	LAM2
CCTCTGACACAGAGGT	5.90331	LAM2
CCTCTGACACGTCTCT	3.06104	PLASM1
CCTCTGATCCCTAACC	6.35635	LAM2
CCTCTGATCGTAGGAG	5.80347	LAM1
CCTTACGAGTGTACGG	6.14543	LAM3
CCTTACGCAATCGAAA	6.02778	LAM2
CCTTACGCAGCGAACA	2.3164	PLASM1
CCTTACGCAGTAACGG	-9.39977e-06	PLASM1
CCTTACGCAGTCCTTC	6.9367	LAM3
CCTTACGCATCGTCGG	5.35274	LAM2
CCTTACGGTGGTCCGT	1.88402	LAM1
CCTTACGTCATCGATG	5.3	LAM3
CCTTCCCAGTACACCT	2.99873	LAM1
CCTTCCCAGTCCATAC	3.53613	PLASM1
CCTTCCCCAATGAATG	6.20599	LAM3
CCTTCCCCACGCTTTC	2.66232	PLASM1
CCTTCCCCAGTTCATG	1.26467e-05	PLASM1
CCTTCCCGTCAATGTC	5.22211	LAM2
CCTTCCCGTTTGTTGG	6.77136	LAM2
CCTTCCCTCCTGTAGA	5.79454	LAM3
CCTTCCCTCTTGAGAC	2.23548	PLASM1
CCTTCGAAGCTGAAAT	3.32987	LAM2
CCTTCGAAGGCCCGTT	5.76354	LAM2
CCTTCGACAGTGACAG	3.10413	LAM2
CCTTCGACATTGGTAC	5.50736	LAM2
CCTTCGAGTCAATACC	5.5489	LAM3
CCTTCGAGTCCGCTGA	6.37023	LAM2
CCTTCGAGTCGGCACT	6.49472	LAM3
CCTTCGAGTGGTTTCA	4.08784	PLASM1
CCTTTCTAGCGCTCCA	3.04163	LAM1
CCTTTCTCAAGCCTAT	3.43927	LAM1
CCTTTCTCAATGACCT	6.86779e-06	PLASM1
CCTTTCTCAGCATACT	3.38609	PLASM1
CCTTTCTGTACTCGCG	2.05713	PLASM1
CCTTTCTTCGCATGGC	4.20006	LAM1
CCTTTCTTCTCCCTGA	5.94228	LAM2
CCTTTCTTCTGCTGTC	3.96927	PLASM1
CGAACATAGGGAACGG	5.3845	LAM2
CGAACATAGTACCGGA	3.21704	LAM1
CGAACATGTAGCGCAA	5.78698	LAM3
CGAACATGTATTAGCC	6.17386	LAM3
CGAACATGTCTTGTCC	4.72378	LAM2
CGAACATGTTGTGGAG	1.35316e-05	PLASM1
CGAACATTCCTTCAAT	-5.28697e-06	PLASM1
CGAATGTAGTACTTGC	6.43264	LAM3
CGAATGTAGTGTCTCA	6.29737	LAM3
CGAATGTCACCGTTGG	4.94671	LAM2
CGAATGTCACGAAATA	5.40421	LAM2
CGAATGTGTAGCTTGT	1.70143	PLASM1
CGAATGTGTGCGCTTG	6.59952	LAM3
CGAATGTTCCAATGGT	6.02066	LAM2
CGAATGTTCTTCTGGC	5.91596	LAM2
CGACCTTCAGCTGTTA	6.32496	PLASM1
CGACCTTGTTGGTGGA	1.59657e-05	PLASM1
CGACTTCCAGGAATGC	7.32614	LAM2
CGACTTCTCACTTACT	4.56095	LAM2
CGAGAAGAGTAACCCT	5.26559	LAM2
CGAGAAGGTCGACTGC	5.26432	LAM2
CGAGAAGGTGGTCTCG	5.98299	LAM2
CGAGAAGTCGCCCTTA	2.15056	PLASM1
CGAGCACAGACTACAA	6.23375	LAM3
CGAGCACAGCCGTCGT	6.07094	LAM2
CGAGCACAGTCTCGGC	5.72284	LAM3
CGAGCACCAAGGACTG	3.19482	PLASM1
CGAGCACCACACTGCG	4.94836	LAM2
CGAGCACTCAGATAAG	3.95546	PLASM1
CGAGCACTCCTTTCTC	6.23146	LAM2
CGAGCACTCGTTACGA	5.76276	LAM2
CGAGCCAAGGGAACGG	6.66028	LAM3
CGAGCCAAGTATCGAA	2.1573	PLASM1
CGAGCCACAACCGCCA	5.48199	LAM2
CGAGCCACACGACGAA	5.90458	LAM3
CGAGCCAGTGTGACCC	6.20347e-06	PLASM1
CGAGCCAGTTGTGGAG	6.73067e-06	PLASM1
CGAGCCATCGTTACGA	2.59405	PLASM1
CGAGCCATCTAACTGG	3.22939	LAM1
CGATCGGCACTGTGTA	5.86398	LAM1
CGATCGGCAGGAATCG	5.93234	LAM2
CGATCGGCAGTATGCT	2.61793	PLASM1
CGATCGGGTGACGCCT	5.18329	LAM1
CGATCGGGTGTGAATA	3.47307	LAM2
CGATGGCAGACTTGAA	4.17976	LAM2
CGATGGCAGAGGGATA	2.66059	PLASM1
CGATGGCAGGATGCGT	5.41598	LAM1
CGATGGCCAAGGACAC	3.47183e-06	PLASM1
CGATGGCGTCGAATCT	3.59202	PLASM1
CGATGGCGTTGTTTGG	2.94818	PLASM1
CGATGGCTCAGTTAGC	4.23703	LAM2
CGATGGCTCATCGGAT	-5.75618e-06	PLASM1
CGATGTAAGGAGTAGA	5.76317	LAM3
CGATGTAAGGTAGCTG	5.97342	LAM2
CGATGTACACACAGAG	2.18184	PLASM1
CGATGTACAGCGAACA	6.7865	LAM2
CGATGTACATAAGACA	-2.88123e-06	PLASM1
CGATGTAGTCTGATTG	4.90518	LAM2
CGATGTAGTTAGGGTG	2.6001	PLASM1
CGATGTATCTAAGCCA	6.76718	LAM2
CGATTGAAGATATGCA	6.43728	LAM2
CGATTGAAGATCCCGC	-1.11202e-05	PLASM1
CGATTGAAGCAGATCG	5.80855	LAM3
CGATTGAGTCAGAATA	6.15032	LAM2
CGATTGAGTGACAAAT	5.6105	LAM2
CGATTGATCCATTCTA	6.05737	LAM3
CGCCAAGAGGAATGGA	5.72114	LAM2
CGCCAAGAGGCGTACA	5.83485	LAM3
CGCCAAGGTACTTGAC	2.60253	PLASM1
CGCCAAGGTTGAGGTG	6.46992	LAM3
CGCCAAGTCAGTCAGT	2.18303	LAM1
CGCGGTAAGTTAACGA	5.92938	LAM1
CGCGGTACAATACGCT	2.92198	LAM2
CGCGGTACACATCTTT	3.93936	LAM2
CGCGGTAGTAGAGTGC	5.68581	LAM1
CGCGGTATCAACACCA	3.53857	LAM2
CGCGGTATCAAGAAGT	5.98205	LAM2
CGCGTTTAGAATGTGT	6.11794	LAM2
CGCGTTTCACGTTGGC	4.61573	LAM1
CGCGTTTGTCCAGTTA	5.12163	LAM2
CGCGTTTGTCTGATTG	5.99148	LAM2
CGCGTTTGTGGTTTCA	6.33584	LAM3
CGCGTTTTCAGAAATG	5.70612	LAM2
CGCGTTTTCTTGTCAT	2.40678	PLASM1
CGCGTTTTCTTTAGGG	5.99798	LAM2
CGCTATCAGGGCATGT	5.71689	LAM2
CGCTATCAGTGTTTGC	4.63324	LAM2
CGCTATCCAAGGGTCA	3.55294	PLASM1
CGCTATCCACGAAATA	9.33388e-06	PLASM1
CGCTATCCATACCATG	5.11161	LAM2
CGCTATCGTATCAGTC	3.21439	PLASM1
CGCTATCGTGACGGTA	6.16934	LAM2
CGCTATCGTTCTGAAC	2.68214	LAM2
CGCTGGAAGGCCCTTG	3.29661	PLASM1
CGCTGGACAAGCGTAG	2.22127	PLASM1
CGCTGGACAAGGTGTG	5.88468	LAM2
CGCTGGACACTTGGAT	2.51246	PLASM1
CGCTGGACATATGAGA	6.12548	LAM3
CGCTGGATCCACTGGG	3.54305	LAM2
CGCTTCACAAAGTCAA	6.09948	LAM2
CGCTTCACAGTTTACG	3.17897	PLASM1
CGCTTCAGTAACGACG	5.64408	LAM2
CGCTTCAGTCAATACC	3.38692	PLASM1
CGCTTCAGTTCACCTC	5.39644	LAM2
CGCTTCAGTTCCCGAG	4.74272	LAM1
CGGACACAGATGGGTC	2.01451	PLASM1
CGGACACCAAAGAATC	3.06043	PLASM1
CGGACACCACGCTTTC	5.22108	LAM2
CGGACACGTACCGAGA	5.9122	PLASM1
CGGACACGTTGCCTCT	-1.19145e-06	PLASM1
CGGACACTCACTTCAT	5.23099	LAM2
CGGACACTCGGAGGTA	5.94787	LAM2
CGGACACTCGTGGACC	2.90931	PLASM1
CGGACGTAGATCGATA	1.35548	PLASM1
CGGACGTAGGATGGAA	6.21858	LAM3
CGGACGTCAGTCACTA	4.34311	PLASM1
CGGACGTGTACGAAAT	5.31077	LAM1
CGGACGTTCATCGATG	3.13037	PLASM1
CGGACGTTCCCTAACC	5.18181	LAM2
CGGACTGGTCAAAGCG	5.53989	LAM2
CGGACTGGTGACGCCT	3.65751	PLASM1
CGGACTGTCGCCATAA	6.83679	LAM3
CGGAGCTAGGACACCA	3.26911	LAM2
CGGAGCTCAGGGCATA	5.62069	LAM2
CGGAGCTCAGTGAGTG	6.61379	LAM3
CGGAGCTCATGCTAGT	3.06556	PLASM1
CGGAGCTGTAGAGCTG	2.91079	PLASM1
CGGAGCTGTCAAACTC	-5.47074e-06	LAM2
CGGAGCTTCTATCCTA	5.75594	PLASM1
CGGAGTCAGGCTAGCA	2.44899	LAM2
CGGAGTCCACCAACCG	6.85072	LAM3
CGGAGTCCACCCTATC	5.06494	LAM2
CGGAGTCCATTATCTC	5.94804	LAM2
CGGAGTCCATTGCGGC	6.11482	LAM2
CGGAGTCGTGCTTCTC	1.972	PLASM1
CGGAGTCTCAGGCCCA	6.52422	LAM3
CGGAGTCTCCAGATCA	2.85126	LAM1
CGGAGTCTCGAGAACG	-1.16634e-05	PLASM1
CGGAGTCTCGCCTGAG	6.02957	LAM1
CGGAGTCTCGGAATCT	4.06807	LAM2
CGGAGTCTCGTTACGA	4.87931	LAM2
CGGAGTCTCTCAAGTG	6.03349	LAM3
CGGCTAGAGGTGCACA	6.41296	LAM2
CGGCTAGCACATGGGA	4.94487	LAM2
CGGCTAGCATGCCACG	6.25954	LAM2
CGGCTAGGTAAGAGGA	2.86736	LAM1
CGGCTAGGTACAAGTA	6.21478	LAM2
CGGCTAGGTTCCATGA	5.67348	LAM2
CGGCTAGTCGGTGTCG	6.10586	LAM2
CGGGTCAAGCGTAGTG	6.33851	LAM3
CGGGTCAAGGTTCCTA	6.33894	LAM2
CGGGTCAAGTACGATA	6.91111	LAM3
CGGGTCATCTGCCAGG	5.72717	LAM2
CGGTTAAAGAATAGGG	7.04544	LAM3
CGGTTAACAGTCGTGC	1.76896	PLASM1
CGGTTAAGTACTTGAC	6.39759	LAM3
CGGTTAAGTCTCCATC	5.64052	LAM1
CGGTTAATCACCGTAA	2.68852	LAM2
CGGTTAATCGATCCCT	6.17534	LAM3
CGGTTAATCTCACATT	4.35618	LAM2
CGTAGCGAGGAATGGA	3.26096	PLASM1
CGTAGCGAGTGCCAGA	4.19184	LAM1
CGTAGCGAGTGTCTCA	6.16304	LAM3
CGTAGCGCAATAAGCA	4.96401	LAM2
CGTAGCGCATTCGACA	6.14546	LAM3
CGTAGCGGTGTCAATC	2.89641e-06	PLASM1
CGTAGGCAGGCATGGT	1.96108	PLASM1
CGTAGGCCAAACGTGG	6.15736	LAM3
CGTAGGCGTCGCGAAA	-2.87493e-07	PLASM1
CGTAGGCGTGAGGGAG	6.61634	LAM2
CGTAGGCGTTCTCATT	5.28742	LAM2
CGTCACTAGAGTACCG	4.37897	LAM1
CGTCACTAGGGAAACA	6.07197	LAM3
CGTCACTAGTTCGCGC	6.00742	LAM2
CGTCACTCAGCCTATA	6.25386	LAM3
CGTCACTCATGCGCAC	5.18654	LAM1
CGTCACTGTAGTGAAT	3.24188	PLASM1
CGTCACTGTTTAAGCC	6.40757	LAM3
CGTCAGGAGATCTGAA	5.93643	LAM1
CGTCAGGAGTGCAAGC	5.32052	LAM2
CGTCAGGGTAATTGGA	3.22805	PLASM1
CGTCAGGGTACTCGCG	6.48302	LAM3
CGTCAGGGTATCTGCA	6.63461	LAM2
CGTCCATAGCGTAATA	4.59127	PLASM1
CGTCCATCATGTCCTC	6.37698	LAM2
CGTCCATGTAAGGATT	4.60457	LAM2
CGTCCATGTACCGTAT	6.2168	LAM3
CGTCCATGTGCCTGGT	6.51489	LAM2
CGTCCATGTTGTCTTT	3.33557	LAM2
CGTCCATTCGCATGAT	6.04702	LAM2
CGTCTACCACTGCCAG	3.2471	PLASM1
CGTCTACCAGGGAGAG	6.01888	LAM3
CGTCTACGTGAGTATA	5.48424	LAM1
CGTCTACTCCGAATGT	5.20793	LAM2
CGTCTACTCGTCGTTC	5.76439	LAM3
CGTCTACTCTGCCAGG	6.50391	LAM2
CGTGAGCCAGCTCGCA	4.61787	LAM1
CGTGAGCCATGCCTAA	5.9477	LAM3
CGTGAGCGTAAATGAC	6.1021	LAM2
CGTGAGCGTTAAAGTG	3.46204	PLASM1
CGTGAGCTCCTTTACA	6.30017	LAM3
CGTGAGCTCTGCCCTA	5.72652	LAM3
CGTGTAAAGTGCGTGA	-5.53224e-06	PLASM1
CGTGTCTTCAGGCGAA	5.63751	LAM2
CGTTAGAAGCGTAGTG	6.37289	LAM3
CGTTAGATCCGAACGC	6.09987	LAM3
CGTTCTGAGCCTATGT	3.66319	PLASM1
CGTTCTGCACACCGCA	4.13391	PLASM1
CGTTCTGCATGTCGAT	6.05641	LAM2
CGTTCTGGTCGACTGC	2.27595	PLASM1
CGTTCTGTCCGCGCAA	6.03325	LAM2
CGTTCTGTCGCCCTTA	6.41022	LAM2
CGTTCTGTCGGTTAAC	4.57548	LAM2
CGTTGGGCACACTGCG	5.8289	LAM2
CGTTGGGCATGCCCGA	6.03796	LAM3
CGTTGGGGTATTAGCC	5.15015	LAM2
CGTTGGGGTGCACCAC	2.49222	PLASM1
CGTTGGGTCAGGATCT	5.5215	LAM2
CTAACTTAGCCCAACC	6.41151	LAM3
CTAACTTAGGTGACCA	6.58825	LAM2
CTAACTTAGTCTCCTC	-3.44484e-06	PLASM1
CTAACTTAGTGGTAGC	2.12273	PLASM1
CTAACTTCAACACGCC	6.43527	LAM3
CTAACTTCAAGCCGTC	8.93504e-07	PLASM1
CTAACTTCACGCGAAA	5.59574	LAM3
CTAACTTCACTTCGAA	5.5272	LAM2
CTAACTTTCCACTGGG	6.25641	PLASM1
CTAACTTTCCCTCTTT	6.39443	LAM2
CTAAGACAGCGATATA	6.80658	LAM2
CTAAGACAGTATTGGA	6.16481	LAM1
CTAAGACAGTTTCCTT	6.3582	LAM2
CTAAGACCAAAGGTGC	6.20586	LAM2
CTAAGACCAGACAAGC	5.92138	LAM3
CTAAGACCATATGGTC	5.48829	LAM2
CTAAGACCATTACCTT	-1.45769e-06	LAM1
CTAAGACGTACGCACC	3.34866	PLASM1
CTAAGACGTGCACCAC	-4.91091e-06	PLASM1
CTAAGACGTTTCCACC	6.72727	LAM2
CTAAGACTCGTGGACC	6.33924	LAM2
CTAAGACTCTCAAACG	5.85311	LAM2
CTAATGGAGGAGCGAG	6.43041	LAM2
CTAATGGAGTTAACGA	5.76527	LAM2
CTAATGGCATAGGATA	4.05232	LAM1
CTAATGGGTATGAATG	6.0296	LAM2
CTAATGGGTCATATCG	5.66503	LAM3
CTAATGGTCATGTAGC	1.34602e-05	LAM1
CTAATGGTCCACTCCA	6.01417	LAM3
CTACACCCAAAGAATC	5.76876	PLASM1
CTACACCCAAGACGTG	2.91378	PLASM1
CTACACCCACCGATAT	6.67726	LAM2
CTACACCCATCATCCC	3.62201	PLASM1
CTACACCGTGCGAAAC	3.80776	PLASM1
CTACACCTCAGCACAT	2.70931	PLASM1
CTACATTCAAGCGTAG	3.67305	PLASM1
CTACATTGTCCAAGTT	1.55627e-07	PLASM1
CTACATTGTTAAGACA	5.89562	LAM2
CTACATTTCTCATTCA	6.14243	LAM3
CTACCCAAGAGAGCTC	5.87492	LAM2
CTACCCAAGAGGTACC	5.86604	LAM2
CTACCCAAGGTCGGAT	3.02493	PLASM1
CTACCCAAGTGGAGAA	2.25637	LAM1
CTACCCAGTAGCGATG	5.51662	LAM2
CTACCCAGTCAACTGT	5.39134	LAM2
CTACCCAGTTGTGGAG	6.41844	LAM2
CTACCCATCCAGATCA	2.61919	LAM2
CTACGTCAGAGACTTA	6.83299	LAM3
CTACGTCCAATGTTGC	9.44618e-06	PLASM1
CTACGTCCACGTCTCT	5.97281	LAM2
CTACGTCCAGGTCTCG	6.59095	LAM3
CTACGTCGTAGCCTAT	6.37836	LAM2
CTACGTCGTAGGCATG	3.50305	PLASM1
CTACGTCTCCTCAACC	6.60626	PLASM1
CTAGAGTCAACTGCGC	5.62249	LAM3
CTAGAGTCAAGACACG	3.10608e-06	PLASM1
CTAGAGTCAGGACCCT	-1.4511e-06	PLASM1
CTAGAGTGTCTGCAAT	6.22236	LAM3
CTAGAGTTCTGATTCT	5.83606	LAM3
CTAGCCTAGCGATGAC	4.35761	LAM1
CTAGTGAAGGGAGTAA	5.0897	LAM2
CTAGTGAAGTGGGTTG	-9.60108e-06	PLASM1
CTAGTGAGTATTAGCC	2.42459	PLASM1
CTAGTGAGTCAGAATA	2.70595	PLASM1
CTAGTGATCCCAACGG	6.10351	LAM3
CTCACACTCTCAACTT	5.63562	LAM2
CTCAGAACAAATTGCC	6.65245	LAM2
CTCAGAACACTTGGAT	6.15879	LAM3
CTCAGAAGTCCAAGTT	4.74527	LAM1
CTCAGAATCGTACGGC	6.01852	LAM3
CTCATTAAGACGCAAC	6.59555	LAM3
CTCATTAAGGCAATTA	6.24779	LAM2
CTCATTAAGGCAGTCA	2.01023	PLASM1
CTCATTACAAAGTCAA	3.33253	PLASM1
CTCCTAGCACCGGAAA	2.07531	PLASM1
CTCCTAGGTGTGCGTC	5.73053	LAM3
CTCCTAGGTTCACCTC	6.80205	LAM3
CTCCTAGGTTCACGGC	3.52908	PLASM1
CTCCTAGGTTGAACTC	-5.33306e-06	PLASM1
CTCGAAAAGAAGAAGC	3.49132	PLASM1
CTCGAAAAGATGCCAG	5.42295	LAM2
CTCGAAAAGCGATTCT	2.86996	PLASM1
CTCGAAACAGCTTAAC	4.30378	LAM2
CTCGAAATCGTGGTCG	3.48506	LAM1
CTCGAGGAGTAGCCGA	3.46009	PLASM1
CTCGAGGCACTTGGAT	3.68786	PLASM1
CTCGAGGCATATGAGA	6.99528	LAM2
CTCGAGGTCTGCGACG	6.29094	LAM2
CTCGGAGAGAACAACT	5.95	LAM2
CTCGGAGCACGCGAAA	2.75568	PLASM1
CTCGGAGCAGGACGTA	3.20217	PLASM1
CTCGGAGGTGACAAAT	3.17163	LAM2
CTCGGAGTCACCAGGC	6.12424	LAM3
CTCGGGAAGAGGGCTT	3.13705	LAM1
CTCGGGAAGCGTTCCG	6.21482	LAM3
CTCGGGAAGGAGTTTA	6.04181	LAM2
CTCGGGAAGGATCGCA	3.28978	LAM2
CTCGGGACACAAGACG	5.89207	LAM2
CTCGGGACACTCAGGC	2.56061	PLASM1
CTCGGGATCATGTAGC	4.95677	LAM2
CTCGTACGTACCTACA	4.84247	LAM2
CTCGTACTCTACTTAC	4.5429	PLASM1
CTCGTCAAGATGTGGC	6.06027	LAM3
CTCGTCAAGCGAGAAA	5.04665	LAM2
CTCGTCAAGCTGCAAG	6.42198	LAM3
CTCGTCAGTTAAGGGC	5.30992	LAM2
CTCGTCATCGCTAGCG	3.47484	PLASM1
CTCTAATCATGGAATA	6.70849	LAM3
CTCTAATTCACCACCT	-9.08803e-06	PLASM1
CTCTAATTCGAATGCT	3.65805	PLASM1
CTCTAATTCGCATGGC	6.55944	LAM3
CTCTACGAGCTTTGGT	6.02487	LAM3
CTCTACGCAACTGCGC	6.24083	LAM2
CTCTACGCATGCCTAA	5.96648	LAM2
CTCTACGGTGTGCCTG	2.43593	LAM1
CTCTACGGTTCGCTAA	1.24035e-06	PLASM1
CTCTACGTCGACCAGC	5.86965	LAM2
CTCTGGTAGGAATGGA	5.64003	LAM3
CTCTGGTAGGCATGGT	6.65403	LAM3
CTCTGGTCACCAGGCT	6.16837	LAM2
CTCTGGTCACGAGGTA	4.04683	LAM1
CTCTGGTCACGTTGGC	1.85921	LAM1
CTCTGGTCACTCAGGC	6.36377	LAM2
CTCTGGTGTGTGGTTT	-1.05684e-05	PLASM1
CTCTGGTTCAACCATG	5.33106e-06	PLASM1
CTCTGGTTCACATAGC	6.22486	PLASM1
CTCTGGTTCACTGGGC	5.74822	LAM2
CTCTGGTTCCTCCTAG	5.32762	LAM2
CTCTGGTTCTTGAGAC	-1.71557e-05	LAM1
CTGAAACAGTACGTAA	6.26223	LAM2
CTGAAACTCCAGGGCT	4.19582	PLASM1
CTGAAACTCCCTGACT	6.44544	LAM2
CTGAAGTAGACTTTCG	-2.57537e-06	LAM1
CTGAAGTAGCTAACAA	6.14376	LAM2
CTGAAGTAGGGAACGG	6.06399	LAM2
CTGAAGTAGTCCTCCT	4.991	LAM2
CTGAAGTAGTCGATAA	5.78943	LAM2
CTGAAGTCAAGTCTAC	6.05271	LAM2
CTGAAGTCAGCGTAAG	6.21278	LAM3
CTGAAGTGTCTAGAGG	1.83568	PLASM1
CTGAAGTGTTGAGGTG	6.14021	LAM3
CTGAAGTTCCACGTGG	6.1822	LAM3
CTGAAGTTCGCAAGCC	5.58175	LAM1
CTGAAGTTCTCTTATG	3.95401	LAM2
CTGATAGAGAGTACAT	5.40063	LAM1
CTGATAGTCATGCAAC	1.62308	PLASM1
CTGATAGTCTTCGAGA	5.51133	LAM1
CTGATCCAGGGTGTTG	6.46327	LAM2
CTGATCCAGGTAGCTG	5.15144	LAM2
CTGATCCTCACGAAGG	6.1548	LAM2
CTGATCCTCCACGTTC	5.43873	LAM2
CTGATCCTCCAGTAGT	6.32901	PLASM1
CTGCCTAAGAAACGCC	5.54195	LAM2
CTGCCTAAGATAGTCA	2.48104	PLASM1
CTGCCTAGTAGGCATG	2.22374	PLASM1
CTGCCTAGTTACTGAC	6.07978	LAM2
CTGCCTATCTTCTGGC	6.66016	LAM2
CTGCGGAAGCACAGGT	8.81023e-06	PLASM1
CTGCGGAAGCCAGGAT	1.00254e-05	PLASM1
CTGCGGAAGTCTCGGC	3.47263	PLASM1
CTGCGGAGTCATATGC	1.6894	PLASM1
CTGCGGATCATTGCCC	2.95402e-06	PLASM1
CTGCGGATCGCCGTGA	4.2493	LAM2
CTGCTGTAGGCGCTCT	6.37031	LAM2
CTGCTGTAGTGGGATC	6.6719	LAM2
CTGCTGTCAGGGATTG	3.92324	LAM1
CTGCTGTGTCTCCCTA	6.35032	LAM2
CTGCTGTGTCTGCAAT	2.88059	PLASM1
CTGCTGTTCCAAGCCG	6.30849	LAM2
CTGCTGTTCCCTGACT	6.22402	LAM3
CTGGTCTGTAACGTTC	4.2679	LAM2
CTGGTCTGTATGCTTG	8.7043e-06	PLASM1
CTGGTCTTCACATAGC	5.93287	LAM2
CTGGTCTTCACTTATC	2.84747	PLASM1
CTGGTCTTCCAATGGT	5.86244	LAM2
CTGTGCTAGTACTTGC	6.83032	LAM2
CTGTGCTCACCGCTAG	4.77204	LAM2
CTGTGCTCACTTAAGC	5.33182	LAM2
CTGTGCTCATCCGGGT	4.75351	LAM2
CTGTGCTTCAGCATGT	4.38028	LAM2
CTGTGCTTCGCCATAA	4.51191	LAM1
CTGTTTAAGACAAGCC	6.24054	LAM2
CTGTTTAAGCCTTGAT	6.03554	LAM2
CTGTTTACAATCTACG	2.58537	PLASM1
CTGTTTACACTAAGTC	3.40243	PLASM1
CTGTTTATCAGAAATG	2.70207	PLASM1
CTGTTTATCAGGCCCA	6.02561	LAM2
CTTAACTCAATCGAAA	5.78696	LAM2
CTTAACTCAGGCGATA	7.04672	LAM2
CTTAACTCATGTTGAC	2.30591	PLASM1
CTTAACTGTAGCACGA	3.3084	PLASM1
CTTAACTGTCAACATC	2.62293	PLASM1
CTTAACTGTCTCCATC	2.1387	PLASM1
CTTAACTTCCCAAGTA	-2.35522e-05	LAM1
CTTAACTTCCGTTGTC	5.10421	LAM2
CTTAACTTCTGTGCAA	6.51767	LAM3
CTTACCGAGAAACCTA	5.16381	LAM2
CTTACCGAGACGCAAC	5.23308	LAM2
CTTACCGCACCCAGTG	2.78713	PLASM1
CTTACCGTCTAACGGT	5.65877	LAM2
CTTAGGAAGTTGAGAT	8.41787e-06	LAM2
CTTAGGACACCACCAG	5.20474	LAM2
CTTAGGATCAATCTCT	3.18611	LAM2
CTTAGGATCAGCTGGC	6.71121e-06	PLASM1
CTTCTCTAGAATAGGG	6.3815	LAM2
CTTCTCTCAAGCCGTC	6.41896	LAM2
CTTCTCTGTAAGCACG	5.36474	LAM2
CTTCTCTGTGTCAATC	6.57798	LAM2
CTTCTCTGTGTTGAGG	6.11879	LAM2
CTTGGCTAGATGGCGT	6.20758	LAM2
CTTGGCTAGGTAAACT	6.02581	LAM3
CTTGGCTCACACCGCA	6.0362	LAM3
CTTGGCTCACATTAGC	6.06331	LAM3
CTTGGCTCACCGTTGG	-1.06961e-05	LAM1
CTTGGCTCATGTAGTC	5.75021	LAM2
CTTGGCTGTAAATGTG	4.40406	PLASM1
CTTGGCTGTTAGATGA	2.3913	PLASM1
CTTGGCTGTTCTGGTA	6.42433	LAM3
CTTGGCTTCTTTAGTC	5.61942	LAM2
CTTTGCGAGAGTCTGG	1.81225	PLASM1
CTTTGCGCACGACGAA	6.29313	LAM2
CTTTGCGCAGGTTTCA	5.75471	LAM3
CTTTGCGCATCGACGC	2.90889	PLASM1
CTTTGCGGTGCGATAG	5.7688	LAM3
CTTTGCGGTGGTACAG	6.01512	LAM2
CTTTGCGTCCAAGTAC	6.22703	LAM3
CTTTGCGTCTTCATGT	-1.34633e-06	PLASM1
GAAACTCCAAATTGCC	5.29083	LAM2
GAAACTCCAGGATCGA	2.86293	PLASM1
GAAACTCCATAACCTG	5.9724	LAM2
GAAACTCCATACAGCT	2.47536	PLASM1
GAAACTCCATTTGCCC	5.84009	LAM2
GAAACTCGTGTTGAGG	2.76958	PLASM1
GAAATGAAGTCTCAAC	7.18965	LAM3
GAAATGAAGTCTTGCA	4.27166	LAM2
GAAATGAAGTTTGCGT	6.40489	LAM3
GAAATGACATCCGCGA	5.85109	LAM2
GAAATGAGTTCCGGCA	6.023	LAM2
GAAATGATCATCACCC	6.0992	LAM2
GAAATGATCGACAGCC	2.1989	LAM1
GAACATCAGAAGGACA	5.9578	LAM2
GAACATCAGATGTGGC	5.88605	LAM3
GAACATCCACGAAACG	3.21012	PLASM1
GAACATCCACGGTGTC	2.27025	PLASM1
GAACATCCAGCATGAG	3.05716	PLASM1
GAACATCCATGCCTTC	3.64319	PLASM1
GAACATCGTCCTAGCG	2.57508	PLASM1
GAACATCGTCGGGTCT	5.9727	LAM1
GAACATCTCACTCCTG	2.53473	PLASM1
GAACATCTCACTTATC	6.05687	LAM2
GAACCTAAGATGTTAG	5.42419	LAM2
GAACCTAAGTCTTGCA	2.63357	PLASM1
GAACCTAAGTGCCATT	6.34264	LAM2
GAACCTACAAGCGCTC	4.41729	PLASM1
GAACCTAGTCATCGGC	5.70101	LAM2
GAACCTAGTGTGTGCC	6.66555	LAM3
GAACCTATCGGATGGA	2.00109	LAM1
GAACCTATCTTTACAC	2.35814	LAM1
GAACGGAAGTGGGATC	3.44315	PLASM1
GAACGGACAAGCGATG	3.50148	PLASM1
GAACGGACATCACGAT	6.15692	LAM3
GAACGGAGTATGAAAC	6.23315	LAM3
GAACGGAGTCCGTGAC	2.35383	PLASM1
GAACGGAGTCCTCTTG	5.38156	LAM1
GAACGGATCCCTCAGT	2.60743	LAM1
GAACGGATCCTGTAGA	2.34695	PLASM1
GAACGGATCGTTTGCC	6.42631	LAM3
GAAGCAGAGCTACCGC	5.96339	LAM2
GAAGCAGGTGTGCGTC	2.75816	PLASM1
GAAGCAGTCACCATAG	5.8618	LAM2
GAAGCAGTCCAGAGGA	2.2633	PLASM1
GAAGCAGTCCGTCAAA	5.82978	LAM2
GAAGCAGTCCTCGCAT	4.04823	PLASM1
GAAGCAGTCTTGAGGT	6.05853	LAM2
GAATAAGAGCAGATCG	6.61782	LAM2
GAATAAGAGGGATCTG	5.76709	LAM2
GAATAAGCAAACGTGG	6.05787	LAM3
GAATAAGCATATACCG	6.44244	LAM1
GAATAAGCATTCCTGC	2.86188	LAM1
GAATAAGGTAGCTTGT	6.25704	LAM2
GAATAAGGTATGCTTG	5.67984	LAM2
GAATAAGTCTTCTGGC	6.11182	LAM2
GAATGAAAGAGGACGG	5.63042	LAM2
GAATGAAAGCGATTCT	6.22429	LAM2
GAATGAAAGGTGTTAA	4.82364	LAM2
GAATGAACAAAGCGGT	1.41444	PLASM1
GAATGAAGTGAGCGAT	5.57514	LAM1
GAATGAATCCATGCTC	5.73066	LAM2
GAATGAATCGAGAGCA	3.76747	PLASM1
GACACGCAGAGTCTGG	1.92205e-06	PLASM1
GACACGCGTCTTGATG	7.35988	LAM2
GACACGCGTGATAAAC	5.72252	LAM2
GACACGCGTTGCGCAC	2.62918	PLASM1
GACACGCTCCCTCTTT	3.85993	PLASM1
GACAGAGAGCGCCTTG	1.50208	PLASM1
GACAGAGGTCCGACGT	2.378	LAM1
GACAGAGTCACTCTTA	2.06373	PLASM1
GACAGAGTCTGGCGAC	5.73421	LAM2
GACCAATAGACTACAA	3.71093	LAM2
GACCAATAGCCACGCT	3.71101	PLASM1
GACCAATAGCGTGAGT	5.83777	LAM2
GACCAATAGGATGGTC	1.8269	LAM1
GACCAATCAGATGGCA	5.81234	LAM2
GACCAATCAGCGTAAG	2.58317	PLASM1
GACCAATGTCAATGTC	4.22154	PLASM1
GACCAATGTGCACGAA	3.43008	PLASM1
GACCAATTCACCGGGT	2.66816	PLASM1
GACCTGGGTAGAAGGA	5.54288	LAM2
GACGCGTAGTGACTCT	5.3375	LAM3
GACGCGTCAAGAGGCT	2.70934	PLASM1
GACGCGTCACAACGTT	3.56585	LAM1
GACGCGTCAGTATGCT	2.62107	LAM1
GACGCGTCATTTGCCC	2.79091	PLASM1
GACGCGTTCGCAGGCT	3.07448	PLASM1
GACGCGTTCTTTACAC	6.31387	LAM3
GACGGCTCAGGGTATG	6.05165	LAM2
GACGGCTGTCTTCGTC	6.38557	LAM3
GACGGCTGTGATGTCT	6.05831	LAM2
GACGGCTGTTCGAATC	6.37035	LAM2
GACGGCTTCTGGGCCA	6.02309	LAM3
GACGGCTTCTGGTTCC	3.29376	LAM1
GACGTGCAGAATTCCC	3.29168	LAM2
GACGTGCCACAGTCGC	5.62432	LAM2
GACGTGCCACATCTTT	5.9818	LAM2
GACGTGCCATCCGTGG	4.87226	LAM1
GACGTGCTCGATGAGG	3.13683	LAM1
GACGTGCTCGCTTAGA	6.81635	LAM3
GACGTGCTCTCGATGA	4.90846	LAM2
GACGTTACAAAGTGCG	2.65876	PLASM1
GACGTTACACCAACCG	4.67637	LAM2
GACTAACAGACTACAA	3.09193	PLASM1
GACTAACAGTGCCAGA	5.2297	LAM2
GACTAACCAACTTGAC	6.14232	LAM3
GACTAACCAATGGAAT	6.00841	LAM2
GACTAACGTTGCTCCT	6.09849	LAM2
GACTAACTCCTGTACC	5.8391	LAM2
GACTACAAGGAGTCTG	5.02505	LAM1
GACTACACACATGACT	6.49593	LAM3
GACTACAGTAGCGCAA	2.70292	LAM2
GACTACATCAAGCCTA	3.23029	PLASM1
GACTACATCGCTTGTC	2.20642	PLASM1
GACTACATCTTAGCCC	3.50623	PLASM1
GACTGCGAGCCGTCGT	3.92964	PLASM1
GACTGCGGTCCAACTA	5.93991	LAM2
GACTGCGGTTCCGTCT	2.33402	PLASM1
GACTGCGTCAACCATG	5.71818	LAM3
GACTGCGTCACGACTA	5.17373	LAM1
GACTGCGTCTAGAGTC	3.01741	LAM1
GAGCAGAAGCCTATGT	6.07919	LAM2
GAGCAGACACATCCAA	5.80594	LAM2
GAGCAGAGTGTGAATA	3.64371	PLASM1
GAGCAGATCCCTTGCA	4.57438	LAM1
GAGGTGAAGACAATAC	5.455	LAM2
GAGGTGACAATAGCGG	6.25988	LAM3
GAGGTGACACAGATTC	6.42745	LAM3
GAGGTGACACCAGATT	3.26148	PLASM1
GAGGTGAGTTCAGCGC	2.42766	PLASM1
GAGGTGAGTTGGTTTG	6.62963	LAM2
GAGGTGATCACTTCAT	2.36828	LAM1
GAGGTGATCCGATATG	5.14119	LAM2
GAGGTGATCGTATCAG	5.32503	LAM3
GAGTCCGAGAGTGACC	2.22668	LAM2
GAGTCCGCAGGATTGG	1.96358	LAM2
GAGTCCGGTGAGTATA	6.00469	LAM2
GAGTCCGGTGCTGTAT	6.17517	LAM2
GAGTCCGTCGCCAAAT	4.87497	LAM2
GATCAGTAGCTGAAAT	2.56708	PLASM1
GATCAGTCAGACGCTC	6.14948	LAM2
GATCAGTCAGTACACT	5.66773	LAM2
GATCAGTGTCATTAGC	6.13166	LAM3
GATCAGTTCGAACTGT	6.02535	PLASM1
GATCAGTTCGAATGCT	7.28322	LAM3
GATCAGTTCGTACGGC	4.6894	PLASM1
GATCAGTTCTACGAGT	-3.53594e-06	PLASM1
GATCGATAGAATAGGG	2.92365	PLASM1
GATCGATCACGAAGCA	6.01127	LAM2
GATCGATCACGGATAG	4.33584	PLASM1
GATCGATCATCAGTAC	3.38076	PLASM1
GATCGATCATTAGGCT	5.74666	LAM2
GATCGATGTCAATACC	2.43145	PLASM1
GATCGATGTTCTGAAC	5.87757	LAM2
GATCGATTCTTCGAGA	5.7762	LAM1
GATCGCGAGAGGTTAT	1.92776	PLASM1
GATCGCGAGCCACTAT	5.75731	LAM2
GATCGCGGTCAAAGCG	5.8261	LAM3
GATCGCGGTTGCGCAC	4.65386	LAM2
GATCGTAAGTCCCACG	6.42242	LAM2
GATCGTACACCCATTC	6.00329	LAM2
GATCGTAGTAACGCGA	6.50281	LAM2
GATCGTAGTCAACATC	3.19097	LAM2
GATCGTAGTCGGCACT	5.15834	LAM2
GATCTAGAGTGTCTCA	6.35572	LAM3
GATCTAGCAATAAGCA	6.09454	LAM2
GATCTAGCACGGCTAC	5.01795	LAM1
GATCTAGCATCGATTG	4.69754	LAM1
GATCTAGCATGTCTCC	5.87453	LAM3
GATCTAGTCCGAAGAG	6.40703	LAM3
GATGAAAAGATATGGT	6.64532	LAM3
GATGAAAAGTTCCACA	5.36905	LAM2
GATGAAAAGTTGTCGT	1.98306	LAM1
GATGAAAGTTACGCGC	6.26057	LAM3
GATGAAATCCAAAGTC	5.93736	LAM3
GATGAGGAGATCGGGT	1.6652	PLASM1
GATGAGGAGCCCAATT	6.2508	LAM2
GATGAGGAGCTAGTTC	5.45589	LAM2
GATGAGGCAAAGTCAA	4.87884	PLASM1
GATGAGGCATACAGCT	5.52498	LAM1
GATGAGGGTGATGCCC	4.55092	LAM1
GATGAGGGTTACCAGT	6.41162	LAM3
GATGAGGTCGGAATCT	6.19351	LAM2
GATGAGGTCTTATCTG	5.25297	LAM2
GATGCTAAGCAAATCA	5.34897	LAM2
GATGCTAAGGAGTTTA	5.96754	LAM2
GATGCTAAGGGTGTGT	3.22186	PLASM1
GATGCTACACGAGAGT	-8.46306e-06	PLASM1
GATGCTAGTATATGGA	5.18331	LAM2
GATGCTAGTTCGTCTC	5.31322	LAM3
GATGCTATCCGCGGTA	3.38815	LAM1
GATGCTATCTACTTAC	6.83754	LAM2
GATGCTATCTTCATGT	1.82638	PLASM1
GATTCAGAGACTGTAA	6.30829	LAM2
GATTCAGAGCAGATCG	-6.56117e-06	PLASM1
GATTCAGCAGGAATCG	4.98098	LAM1
GATTCAGGTAGCGTGA	4.1601	PLASM1
GATTCAGGTATGGTTC	4.76834	LAM1
GATTCAGGTCGACTAT	4.92248	LAM2
GCAAACTAGACACGAC	3.33971	PLASM1
GCAAACTAGGCAGTCA	3.70578	PLASM1
GCAAACTAGGGCACTA	4.06636	LAM2
GCAAACTAGTGCGTGA	5.88474	LAM2
GCAAACTCATCGGTTA	3.82883	PLASM1
GCAAACTGTAGGACAC	5.87588	LAM2
GCAAACTGTAGTGAAT	5.77461	LAM2
GCAAACTGTGAGGGTT	4.8987	LAM2
GCAAACTGTGTCAATC	6.38509	LAM2
GCAAACTGTGTGCCTG	3.69406	PLASM1
GCAAACTTCATACGGT	3.41532	PLASM1
GCAATCAAGTTGAGTA	6.24916	LAM3
GCAATCACACAAGCCC	5.70167	LAM2
GCAATCACAGCCTTTC	3.72193	PLASM1
GCAATCACATCCGCGA	5.43754	LAM2
GCAATCACATTGGCGC	5.93967	LAM2
GCAATCATCGCCGTGA	5.51074	LAM2
GCAATCATCTGCAAGT	8.07332e-06	PLASM1
GCACATAAGACGCACA	4.41448	LAM2
GCACATAAGACTAAGT	4.2704	PLASM1
GCACATAAGGTCGGAT	5.49688	LAM2
GCACATAGTATCACCA	6.18795	LAM3
GCACATAGTTCACGGC	2.99477	PLASM1
GCACATATCCTCTAGC	2.23801	PLASM1
GCACATATCTGGTATG	5.90228	LAM3
GCACTCTAGAAGATTC	2.06129	PLASM1
GCACTCTAGCGTCTAT	6.67693	LAM3
GCACTCTAGTGTACTC	3.77677	PLASM1
GCACTCTCAGGTTTCA	6.43292	LAM2
GCACTCTCATCACAAC	6.09755	LAM3
GCACTCTCATGAACCT	6.49872	LAM3
GCACTCTGTCCGACGT	6.24344	LAM3
GCACTCTGTCTGCAAT	6.4714	LAM2
GCACTCTTCATGTAGC	5.48382	LAM2
GCACTCTTCTACGAGT	6.30187	LAM3
GCAGCCAAGTGACTCT	5.32014	LAM2
GCAGTTACAAACTGTC	6.89782	LAM3
GCAGTTACAGGACCCT	6.06286	LAM3
GCAGTTAGTAGGGTAC	5.61739	LAM2
GCAGTTAGTGTATGGG	3.82277	PLASM1
GCAGTTAGTTTCGCTC	5.64513	LAM2
GCAGTTATCGATGAGG	-7.0232e-06	LAM2
GCAGTTATCTTGACGA	3.90958	LAM2
GCATACAAGTATCTCG	6.31369	LAM1
GCATACAGTCTTCTCG	2.72433	PLASM1
GCATGATAGGGAAACA	5.34635	LAM2
GCATGATAGTTGTAGA	1.15636e-05	PLASM1
GCATGATCAGTAACGG	5.82392	LAM3
GCATGATGTTAGATGA	2.6529e-06	PLASM1
GCATGATTCAGATAAG	6.15941	LAM2
GCATGATTCCCATTAT	3.69354	PLASM1
GCATGCGAGCTGCCCA	5.88469	LAM2
GCATGCGAGTGAAGAG	6.1231	LAM2
GCATGCGCAAAGCAAT	6.13349	LAM2
GCATGCGCAAGCTGAG	2.43646	PLASM1
GCATGCGCACGTGAGA	3.05716	LAM2
GCATGCGGTACGCTGC	6.47485	LAM2
GCATGCGGTCGCGAAA	4.02388	PLASM1
GCATGCGGTGCGAAAC	2.5334	PLASM1
GCATGTAGTGGTACAG	5.89675	LAM3
GCATGTAGTTATTCTC	2.11473	LAM1
GCATGTATCAACGGGA	-7.05714e-06	PLASM1
GCATGTATCATGCAAC	5.95901	LAM3
GCCAAATAGCGAGAAA	2.70292	PLASM1
GCCAAATCAGACAGGT	6.58198	LAM2
GCCAAATGTCATCCCT	-9.41769e-06	PLASM1
GCCAAATTCACGATGT	5.78904	LAM2
GCCAAATTCTTGCAAG	6.37629	LAM2
GCCTCTATCACGCATA	2.42921	PLASM1
GCCTCTATCCGTAGTA	2.6437	PLASM1
GCCTCTATCGGTGTCG	5.7452	LAM3
GCCTCTATCTAACCGA	4.67537	LAM2
GCGACCAAGAAACCAT	6.19339	LAM3
GCGACCAAGCGGCTTC	6.58262	LAM2
GCGACCACACTTAAGC	5.85377	LAM2
GCGACCAGTAGGACAC	3.46733	PLASM1
GCGACCATCAAACAAG	6.85986	LAM2
GCGACCATCGGATGTT	6.12326	LAM2
GCGAGAAAGAGGTTGC	3.07071	PLASM1
GCGAGAAAGCTATGCT	2.5769	LAM1
GCGAGAAAGGTAGCCA	5.846	LAM3
GCGAGAAAGGTTCCTA	5.60375	LAM3
GCGAGAACAATCCGAT	2.42664	PLASM1
GCGAGAACAGCTGCTG	5.46987	LAM2
GCGAGAACATGTAAGA	5.30716	LAM2
GCGAGAAGTGTTCGAT	3.62855	PLASM1
GCGCAACAGATCCGAG	3.78331	LAM1
GCGCAACAGCTTTGGT	4.85123	LAM2
GCGCAACAGTATCTCG	-5.48293e-06	PLASM1
GCGCAACAGTGTCCAT	6.20988	LAM2
GCGCAACCAAGCTGAG	3.41586	PLASM1
GCGCAACCAATAGAGT	5.99216	LAM3
GCGCAACCAATGGAAT	6.02865	LAM2
GCGCAACGTACACCGC	5.68404	LAM2
GCGCAACGTCCGTCAG	6.05938	LAM2
GCGCAACGTCTCATCC	3.1854	PLASM1
GCGCAACGTTTGCATG	3.06909	PLASM1
GCGCAACTCGACAGCC	2.638	PLASM1
GCGCAGTAGAAACGAG	5.3587	LAM2
GCGCAGTAGAACAACT	6.05225	LAM2
GCGCAGTAGGCTAGCA	3.67974	LAM2
GCGCAGTAGTCCAGGA	5.90988	LAM3
GCGCAGTGTGTATGGG	5.76462	LAM2
GCGCAGTTCGGAAACG	6.19147	LAM3
GCGCCAAAGAAGGCCT	5.56557	LAM2
GCGCCAATCTCTTGAT	3.33205	PLASM1
GCGCGATAGAGACGAA	4.04999	PLASM1
GCGCGATAGATCCCAT	2.86423	LAM2
GCGCGATCACGAGAGT	3.37301	PLASM1
GCGCGATCACTTAACG	6.16753	LAM3
GCGCGATGTCGGATCC	3.20783	LAM2
GCGCGATTCTTGTATC	2.50742	PLASM1
GCGGGTTCACTTCTGC	3.0073	LAM1
GCGGGTTCAGGTGCCT	4.44233	LAM2
GCGGGTTGTGAAGGCT	2.31024	PLASM1
GCGGGTTGTGGTTTCA	5.36602	LAM1
GCGGGTTTCGCGTAGC	6.11026	LAM3
GCGGGTTTCTGGCGTG	5.8711	LAM3
GCTCCTAAGAGGTTAT	6.0668	LAM2
GCTCCTAAGGTGTGGT	4.41954	LAM2
GCTCCTACAAAGTCAA	3.00938	LAM1
GCTCCTACAAGAAAGG	2.46702	PLASM1
GCTCCTACACGACGAA	3.38322	PLASM1
GCTCCTACATAGACTC	4.76254	LAM1
GCTCCTAGTAAGTGTA	6.22835	LAM2
GCTCCTATCACAATGC	4.66543	LAM2
GCTCTGTAGAACTGTA	6.09727	LAM2
GCTCTGTCACTAAGTC	4.45875	LAM2
GCTCTGTGTAAGGGAA	6.0187	LAM2
GCTCTGTTCACCTTAT	6.293	LAM2
GCTCTGTTCCTGTACC	6.48035	LAM2
GCTCTGTTCTAACCGA	1.80567e-05	LAM1
GCTCTGTTCTCGGACG	5.35193	LAM2
GCTGCAGCATTACCTT	6.00407	LAM2
GCTGCAGGTTATTCTC	1.77602	PLASM1
GCTGCAGTCATGTGGT	1.5043	PLASM1
GCTGCGACACATAACC	5.54053	LAM2
GCTGCGACACGGCTAC	3.7339	PLASM1
GCTGCGACATTGCGGC	2.15712	PLASM1
GCTGCGAGTCTCATCC	5.69677	LAM2
GCTGCGAGTTGTGGCC	5.70136	LAM2
GCTGCGATCCAAACAC	6.33783	LAM2
GCTGCGATCCTTTACA	4.69806	LAM2
GCTGCTTAGTGGTAGC	5.57348	LAM1
GCTGCTTCAATGGAAT	6.30391	LAM3
GCTGCTTGTCCTCCAT	4.91488	LAM1
GCTGGGTAGGACTGGT	3.49582	PLASM1
GCTGGGTCAGACAGGT	6.45706	LAM2
GCTGGGTCATCTATGG	2.15104e-06	PLASM1
GCTGGGTGTCTTCAAG	6.37544	LAM3
GCTGGGTGTTCTGAAC	5.49939	LAM2
GCTGGGTTCACGCGGT	5.75558	LAM3
GCTTCCAAGCTGGAAC	6.92401	LAM2
GCTTCCACACAGACAG	6.00073	LAM3
GCTTCCACATGTCTCC	4.7345	LAM1
GCTTCCAGTGGACGAT	-6.90245e-06	PLASM1
GCTTCCAGTGTGTGCC	5.9155	LAM2
GCTTCCAGTTACCAGT	1.37766e-06	PLASM1
GCTTCCAGTTGGGACA	6.17216	LAM2
GCTTGAAAGTAGCGGT	6.66822	LAM2
GCTTGAACAACCGCCA	2.83415	PLASM1
GCTTGAAGTCTTCTCG	5.68414	LAM2
GGAAAGCCACCGAAAG	3.06648	LAM1
GGAAAGCGTTTGGGCC	3.83327	LAM1
GGAAAGCTCATAAAGG	5.50166	LAM2
GGAAAGCTCTCAAGTG	2.36971	PLASM1
GGAACTTAGCGTGAAC	6.29131	LAM3
GGAACTTCACGAAGCA	6.01369	LAM2
GGAACTTGTTACGTCA	3.48261	LAM2
GGAACTTTCTTGAGGT	4.93262	LAM2
GGAATAAAGGGTGTGT	4.49912	LAM2
GGAATAACAAACCCAT	3.79648	LAM2
GGAATAACAAACGTGG	5.27143	LAM2
GGAATAACAATAAGCA	4.975	LAM1
GGAATAACATCCCACT	6.12752	LAM2
GGAATAAGTAAGTTCC	2.6173	PLASM1
GGAATAAGTTATCACG	5.51863	LAM2
GGAATAAGTTGAGGTG	5.95401	LAM2
GGAATAATCCTAGGGC	-7.02e-06	PLASM1
GGACAAGAGAATAGGG	2.7202	PLASM1
GGACAAGAGAGCTTCT	3.99392	PLASM1
GGACAAGAGATCCCAT	2.42714	PLASM1
GGACAAGGTCCGTTAA	2.71203	LAM1
GGACAAGGTGAAGGCT	6.05742	LAM2
GGACAAGTCAAACCGT	6.40719	LAM2
GGACAAGTCATGCAAC	5.61911	LAM2
GGACAGACAAGACACG	1.74044	LAM1
GGACAGACAAGCTGAG	5.87152	LAM2
GGACAGACATCGGAAG	2.05815	PLASM1
GGACATTAGATAGTCA	6.73202	LAM3
GGACATTAGATCTGAA	6.13559	LAM2
GGACATTAGATGTGGC	6.48937	LAM2
GGACATTCACATGACT	5.68842	LAM2
GGACATTGTAGCTCCG	5.71001	LAM2
GGACATTTCCGCGGTA	6.67278	LAM3
GGACATTTCGAACGGA	5.70697	LAM1
GGACATTTCGCAAGCC	5.80128	LAM3
GGACATTTCTGGTATG	6.56282	LAM2
GGACGTCAGCAACGGT	5.612	LAM2
GGACGTCCACGTTGGC	5.17344	LAM2
GGACGTCGTTACAGAA	3.79505	PLASM1
GGACGTCGTTCGGCAC	3.09112	PLASM1
GGACGTCTCATGGTCA	4.15206	LAM2
GGAGCAAGTTCCGGCA	3.6313	LAM1
GGAGCAATCAACACCA	5.90592	LAM2
GGAGCAATCCGTACAA	1.68916	LAM1
GGAGCAATCTCTGCTG	5.39248	LAM1
GGAGCAATCTGGCGAC	3.21956	PLASM1
GGATGTTCATCCGCGA	2.6273	PLASM1
GGATGTTGTTATCGGT	2.3132	PLASM1
GGATTACCAGCCAGAA	5.31683e-06	PLASM1
GGATTACCAGGGTACA	5.97725	LAM1
GGATTACGTCTTCGTC	5.7804	LAM2
GGATTACTCGAACGGA	6.54108	LAM1
GGCAATTAGAGGTTGC	6.46359	LAM2
GGCAATTAGCTTATCG	5.24974	LAM2
GGCAATTAGTACATGA	4.35841	LAM2
GGCAATTCAAGAAGAG	3.12218	LAM1
GGCAATTCAAGCGAGT	2.95765	PLASM1
GGCAATTCATAGTAAG	2.73605	PLASM1
GGCAATTCATTCCTCG	2.42562	LAM2
GGCAATTTCTGCGTAA	3.16839	PLASM1
GGCCGATAGTCTCCTC	6.06153	LAM2
GGCCGATCAACTGCGC	5.95497	LAM2
GGCCGATCAATAAGCA	5.9619	LAM2
GGCCGATCACGTCAGC	5.4465	LAM2
GGCCGATGTAGCGCAA	5.87198	LAM1
GGCCGATGTATAGGTA	2.38256	PLASM1
GGCCGATGTCCCTACT	3.59313	PLASM1
GGCCGATGTCGCATCG	3.3058	PLASM1
GGCCGATGTCTCAACA	3.06042	PLASM1
GGCCGATGTTCCATGA	6.63955	LAM2
GGCGACTGTTAGGGTG	6.11556	LAM3
GGCGACTTCTGGTTCC	5.42936	LAM2
GGCGACTTCTGTCTAT	2.87324	PLASM1
GGCGTGTCACTTCTGC	4.54256	LAM2
GGCGTGTTCACTGGGC	6.6409	LAM3
GGCGTGTTCCGCAGTG	4.98004	LAM2
[truncated: 13,086 more rows]

## Sheet: Panel D
Cell	FBgn0261363	ident
AAACCTGCAGCCTTTC	5.183	LAM2
AAACCTGCATCGACGC	3.83132	LAM2
AAACCTGGTACCTACA	4.7543	LAM2
AAACCTGGTCAAAGCG	6.32863e-06	PLASM1
AAACCTGTCCCAACGG	4.04268e-06	PLASM1
AAACCTGTCCGAACGC	3.95026	LAM2
AAACCTGTCTCATTCA	1.51152e-05	LAM1
AAACGGGAGAATGTGT	4.37647	LAM2
AAACGGGAGACATAAC	3.73109	PLASM1
AAACGGGCAATGAAAC	3.925	LAM2
AAACGGGCATTAACCG	4.67597	LAM2
AAACGGGGTGCACTTA	5.20583	LAM3
AAACGGGTCACTCTTA	3.83861	LAM2
AAACGGGTCTTATCTG	2.89072	LAM1
AAAGATGAGTTCGATC	4.73264	PLASM1
AAAGATGCACAACGTT	2.46488	LAM1
AAAGATGCATACGCCG	5.57679	LAM2
AAAGATGGTGAGCGAT	3.82175	LAM2
AAAGATGTCAGCTCGG	2.52255	LAM3
AAAGCAACATTCACTT	3.04976	LAM2
AAAGCAATCAAGCCTA	1.74198	LAM3
AAAGCAATCTCCTATA	4.36461	LAM2
AAAGCAATCTTACCGC	3.77001	LAM3
AAAGTAGAGTGTGGCA	1.21467e-05	PLASM1
AAAGTAGCACAACTGT	3.90666	LAM3
AAAGTAGCATTCTCAT	-4.30469e-06	LAM2
AAAGTAGGTAGCGTGA	3.99679	LAM2
AAATGCCAGTAATCCC	3.10654	LAM3
AAATGCCAGTGCGATG	1.9959	PLASM1
AAATGCCCACGGATAG	-6.39995e-06	PLASM1
AAATGCCCAGCCACCA	4.81642	LAM1
AAATGCCCATCTGGTA	4.47161	LAM2
AAATGCCGTATCAGTC	1.88461	PLASM1
AAATGCCGTGCTAGCC	-6.08926e-06	PLASM1
AAATGCCTCAGAGCTT	3.43092	LAM2
AAATGCCTCTGAAAGA	-1.71701e-05	PLASM1
AACACGTAGAGACTAT	4.42417	LAM2
AACACGTCACATTCGA	3.373	LAM2
AACACGTCATTAGGCT	3.98559	LAM2
AACACGTGTCGAACAG	4.37826	LAM3
AACACGTGTGTTTGTG	1.90904	LAM2
AACACGTGTTACAGAA	2.41209	PLASM1
AACACGTGTTCAGACT	2.44741	LAM1
AACACGTGTTGAACTC	-7.26705e-06	PLASM1
AACCATGCACATCCAA	3.96234	LAM2
AACCATGCAGCTCCGA	4.32818e-06	LAM1
AACCATGGTCTTGTCC	5.25578	LAM2
AACCATGGTTCCACTC	3.43068	LAM2
AACCATGTCCATGAAC	2.27772	PLASM1
AACCATGTCCCAACGG	1.85649	PLASM1
AACCATGTCGCCCTTA	5.64789	LAM3
AACCATGTCTCGCTTG	5.77513	LAM2
AACCATGTCTCTAAGG	4.32342	LAM2
AACCGCGCAAATACAG	2.23929	PLASM1
AACCGCGGTAGGGTAC	1.84224	LAM3
AACCGCGGTTGACGTT	5.32226	LAM2
AACCGCGTCTCCGGTT	3.92808	LAM3
AACGTTGCATAGTAAG	3.78917	LAM2
AACGTTGTCAAGGTAA	5.14075	LAM2
AACGTTGTCTTAACCT	4.02656	LAM2
AACTCAGAGAGTGAGA	-3.67235e-06	PLASM1
AACTCAGAGATGGCGT	3.65238	LAM2
AACTCAGAGCCCAACC	5.81824e-06	PLASM1
AACTCAGGTAAATGAC	3.31369	LAM3
AACTCAGGTACCATCA	3.85178	LAM2
AACTCAGTCACTATTC	4.5037	LAM2
AACTCCCAGACTAGGC	3.89736	LAM2
AACTCCCCATTAGCCA	1.03851e-05	PLASM1
AACTCCCCATTATCTC	4.92474	LAM2
AACTCCCGTCCCTTGT	7.20878e-06	LAM2
AACTCCCGTGCGAAAC	3.53311	LAM1
AACTCCCTCAAAGACA	5.22199	LAM2
AACTCCCTCCGGCACA	2.23422	LAM2
AACTCTTAGAGGTTAT	2.28435	PLASM1
AACTCTTAGCTCCCAG	5.91486	LAM2
AACTCTTAGGGAACGG	4.03785	LAM2
AACTCTTCATCACGTA	4.13355	LAM2
AACTCTTGTAAGTGTA	3.88983	LAM1
AACTCTTTCTCGATGA	4.93685	LAM3
AACTGGTAGTTGTAGA	5.75285	LAM2
AACTGGTCAAGGCTCC	1.88604	LAM2
AACTGGTCATGGTCAT	2.57921e-06	PLASM1
AACTGGTCATTAGGCT	2.16959	PLASM1
AACTGGTGTCATATGC	-1.20897e-06	PLASM1
AACTGGTGTCTGCAAT	3.38752	LAM2
AACTGGTGTGAGTGAC	6.11997e-06	LAM1
AACTGGTGTTAAAGAC	5.33763	LAM3
AACTGGTGTTCTGGTA	3.46699	LAM3
AACTGGTGTTTACTCT	5.30238	LAM2
AACTTTCGTAGCTCCG	2.60255	PLASM1
AACTTTCGTCAACATC	6.316	LAM1
AACTTTCGTTCGGGCT	2.56767	LAM3
AACTTTCTCATGTAGC	3.06011	LAM2
AACTTTCTCCTGCTTG	1.39111e-05	PLASM1
AAGACCTAGAGTCTGG	3.55083	LAM2
AAGACCTCAACCGCCA	5.53493	LAM2
AAGACCTCAAGTCTGT	4.38068	LAM3
AAGACCTCAATCACAC	-1.45921e-05	PLASM1
AAGACCTCACTGCCAG	3.87945	LAM2
AAGACCTCAGCGTCCA	4.3291	LAM2
AAGACCTCATCACGAT	1.20097e-05	PLASM1
AAGCCGCAGGACCACA	1.04475e-05	LAM2
AAGCCGCAGGAGTTGC	2.25765	LAM2
AAGCCGCCAAGTTGTC	2.51191	PLASM1
AAGCCGCCACCCAGTG	4.67234	LAM2
AAGCCGCGTTCAGGCC	1.05514e-06	PLASM1
AAGCCGCTCAGGTTCA	4.21814	LAM2
AAGGAGCGTAGCTAAA	3.1728	LAM2
AAGGAGCGTCGCCATG	2.40177	LAM2
AAGGAGCGTGAGGGAG	3.82825	LAM3
AAGGAGCGTTAAAGAC	3.82486	LAM1
AAGGAGCTCACATGCA	5.92971	LAM3
AAGGAGCTCTGGGCCA	4.64607	LAM1
AAGGCAGAGGCATTGG	-5.04217e-06	PLASM1
AAGGCAGAGTCATGCT	-1.6611e-05	PLASM1
AAGGCAGCACCGCTAG	2.34434	PLASM1
AAGGCAGCAGGCTCAC	-5.1265e-06	LAM1
AAGGCAGCATTCTTAC	5.0082	LAM2
AAGGCAGGTTACTGAC	-1.36212e-05	PLASM1
AAGGTTCAGCTGAAAT	2.42766	PLASM1
AAGGTTCAGTATCGAA	3.69936	LAM2
AAGGTTCAGTGCTGCC	-1.47044e-05	PLASM1
AAGGTTCGTTGTGGCC	1.24702e-06	PLASM1
AAGGTTCGTTGTTTGG	3.76831	LAM2
AAGGTTCTCTCAAACG	3.99239	LAM2
AAGGTTCTCTGAGGGA	-4.28259e-06	PLASM1
AAGTCTGAGAACTCGG	-6.13672e-06	LAM2
AAGTCTGCAGTAGAGC	-2.02468e-05	PLASM1
AAGTCTGCAGTGGAGT	-1.22475e-05	PLASM1
AAGTCTGGTGTCGCTG	4.60367	LAM2
AAGTCTGTCGCATGAT	3.04254	LAM2
AAGTCTGTCGGCTACG	3.47096	LAM2
AAGTCTGTCGTCCGTT	7.3525	LAM2
AAGTCTGTCTCTGCTG	4.90127	LAM2
AAGTCTGTCTTCGGTC	1.43986e-05	LAM2
AATCCAGAGATGGGTC	1.99266	LAM1
AATCCAGGTCTACCTC	-1.1732e-06	PLASM1
AATCCAGTCCTTGCCA	2.13948	PLASM1
AATCCAGTCGCCCTTA	-4.6973e-06	PLASM1
AATCGGTAGAGTAAGG	5.6604	LAM2
AATCGGTAGTCTCGGC	-8.61073e-07	PLASM1
AATCGGTTCTGCCAGG	4.27722	LAM2
ACACCAAAGCCATCGC	1.51537	PLASM1
ACACCAACAAGTTGTC	3.36151	LAM3
ACACCAACAATCCAAC	2.25249	PLASM1
ACACCAACACAACGTT	2.57302	PLASM1
ACACCAACAGGCTCAC	3.32089	LAM2
ACACCAACAGTGGGAT	-4.33169e-06	PLASM1
ACACCAACATCGTCGG	4.50387	LAM3
ACACCAATCATCACCC	5.05234	LAM2
ACACCAATCCTTTACA	4.71584	LAM3
ACACCAATCGTGTAGT	3.7619	LAM2
ACACCAATCTAACTGG	3.56777	LAM2
ACACCAATCTTAGCCC	2.91901	PLASM1
ACACCCTAGGCGCTCT	4.09225	LAM1
ACACCCTAGTGTCTCA	3.94707	LAM2
ACACCCTCACGACTCG	1.45006	PLASM1
ACACCCTGTCTCCACT	1.8767	PLASM1
ACACCCTGTCTCCATC	3.65832	LAM2
ACACCCTGTGCTAGCC	1.28768e-05	PLASM1
ACACCCTTCATGTGGT	-1.75526e-06	PLASM1
ACACCCTTCCAACCAA	4.41448	LAM3
ACACCGGCAAAGTGCG	3.08017	PLASM1
ACACCGGCAAGGTTCT	1.89716	LAM2
ACACCGGGTTCAGCGC	4.0296	LAM2
ACACTGAAGCTTTGGT	2.19669	LAM2
ACACTGAGTACGCACC	2.48319	PLASM1
ACACTGAGTCATGCCG	2.53568	LAM2
ACACTGATCGTACCGG	4.39743	LAM3
ACAGCCGCAGCCTTGG	2.70071	LAM3
ACAGCCGGTACTCTCC	2.74574	PLASM1
ACAGCCGGTATTCGTG	4.84478	LAM2
ACAGCCGGTCGACTAT	2.2611	LAM1
ACAGCTAAGCAAATCA	5.57371	LAM2
ACAGCTAAGCGATAGC	2.44584	PLASM1
ACAGCTACAGCTATTG	3.59581	LAM1
ACATACGCACTGTTAG	4.3643	LAM2
ACATACGGTTCCTCCA	5.02514	LAM1
ACATACGTCTCTTATG	3.85706	LAM2
ACATCAGAGAGTTGGC	3.45583	LAM3
ACATCAGAGATTACCC	5.5043	LAM3
ACATCAGAGGCTCTTA	-5.84109e-06	LAM1
ACATCAGCACAGCCCA	5.64176	LAM3
ACATCAGGTACATCCA	4.09037	LAM2
ACATCAGGTTCGAATC	3.70761	LAM3
ACATCAGGTTCTGAAC	5.08627	LAM3
ACATGGTAGAGACTAT	7.00749e-06	PLASM1
ACATGGTAGCAATCTC	3.44873	LAM2
ACATGGTAGGCCCTCA	3.15059	LAM3
ACATGGTAGTTACGGG	5.71834	LAM2
ACATGGTCAATGGTCT	4.72041	LAM2
ACATGGTCAGGCTCAC	5.46586	LAM3
ACATGGTCATACTACG	4.35945	LAM3
ACATGGTGTGTTCGAT	6.08158	LAM2
ACATGGTTCCCTGACT	3.2639	PLASM1
ACCAGTAAGATCTGCT	4.65821	LAM2
ACCAGTACATTTGCCC	4.41337	LAM2
ACCAGTAGTATCAGTC	4.27357	LAM2
ACCAGTAGTCATCCCT	1.92169	PLASM1
ACCAGTAGTTCAGGCC	1.28821e-06	PLASM1
ACCCACTCACCGGAAA	3.9557	LAM2
ACCCACTCATGTCGAT	1.50089	PLASM1
ACCCACTCATTTCACT	1.17133e-05	LAM2
ACCGTAAAGTACTTGC	2.63171	LAM2
ACCGTAATCCACGAAT	-1.37686e-05	PLASM1
ACCGTAATCTTCGAGA	-1.15086e-05	PLASM1
ACGAGCCAGAGCCTAG	2.98579	LAM3
ACGAGCCCAAGTTCTG	4.06548	LAM3
ACGAGCCCATGCTAGT	5.76038	LAM3
ACGAGCCGTAGAGCTG	2.86057	LAM2
ACGAGGAAGACCGGAT	1.71048	PLASM1
ACGAGGAAGAGCTGGT	4.10664	LAM3
ACGAGGACAAGTTAAG	1.07775e-06	PLASM1
ACGAGGACAGCATACT	0.905277	PLASM1
ACGAGGACAGCGTCCA	5.40012	LAM2
ACGAGGACATGGATGG	2.56296	PLASM1
ACGAGGAGTAAGTTCC	4.58937	LAM2
ACGAGGATCATCGGAT	2.89475	PLASM1
ACGAGGATCGAACTGT	4.84791	LAM3
ACGAGGATCTGGCGTG	-1.2836e-05	LAM1
ACGATACAGTGTTAGA	4.88397	LAM2
ACGATACGTGCACTTA	-3.51513e-06	PLASM1
ACGATACGTGTTGGGA	-5.21796e-06	PLASM1
ACGATGTAGGCGTACA	-1.06813e-05	LAM1
ACGATGTGTGGTTTCA	4.28366e-06	PLASM1
ACGATGTTCAGCATGT	-1.74018e-06	LAM2
ACGATGTTCCTTCAAT	2.28658	PLASM1
ACGCAGCAGATCTGCT	1.51138	LAM3
ACGCAGCAGGTGTTAA	4.57634	LAM2
ACGCAGCCAGATCCAT	2.88077	PLASM1
ACGCAGCTCGAACTGT	5.10563	LAM3
ACGCAGCTCTTCCTTC	9.47952e-06	PLASM1
ACGCCAGAGAAGGACA	2.89272	LAM3
ACGCCAGAGGTTACCT	2.51357	PLASM1
ACGCCAGCAACTGCGC	4.42374	LAM2
ACGCCAGGTCGTGGCT	5.85316	LAM3
ACGCCAGGTGTAAGTA	5.00652	LAM2
ACGCCAGTCAGCCTAA	5.73407	PLASM1
ACGCCAGTCAGGATCT	4.50598	LAM3
ACGCCGAAGATGGGTC	2.99198	PLASM1
ACGCCGAAGCTGATAA	2.47022	LAM1
ACGCCGAAGGACGAAA	9.98069e-06	PLASM1
ACGCCGAAGGATCGCA	2.84307	LAM2
ACGCCGAAGTTACCCA	1.24886e-05	LAM1
ACGCCGACAGGTGGAT	-1.38064e-05	LAM1
ACGCCGACATCTCCCA	2.04996e-05	PLASM1
ACGCCGAGTGTGCGTC	3.2043	LAM2
ACGCCGATCTATCGCC	2.11437	PLASM1
ACGGAGAAGGTGACCA	7.03608e-06	LAM1
ACGGAGACAATCGAAA	3.35083	LAM2
ACGGAGACACAGACAG	3.46183	LAM3
ACGGCCACAGCTGTTA	3.39248	LAM3
ACGGCCACATTTCACT	2.85991	LAM1
ACGGCCAGTACTTCTT	1.90019e-06	PLASM1
ACGGCCATCATGTCTT	4.37098	LAM3
ACGGCCATCGCTAGCG	4.34936	LAM2
ACGGGCTAGCCATCGC	-7.38441e-06	PLASM1
ACGGGCTAGGTGTGGT	3.89367	LAM2
ACGGGCTCAAGCCATT	3.36549	LAM2
ACGGGCTCAATGAAAC	2.40704	LAM2
ACGGGCTCACACCGCA	3.42645	LAM2
ACGGGCTGTTGGACCC	5.21123	LAM3
ACGGGCTTCCTTTCGG	2.06408	PLASM1
ACGGGCTTCGATGAGG	6.84517	LAM3
ACGGGTCCACGACTCG	2.25795	PLASM1
ACGGGTCCAGTATCTG	5.9833	LAM2
ACGGGTCGTACCATCA	1.73479	LAM2
ACGGGTCGTGCAGGTA	4.21466	LAM2
ACGTCAAAGCTGCCCA	2.315	PLASM1
ACGTCAAAGCTGTCTA	3.04652	LAM3
ACGTCAAAGGCATGGT	3.64294	LAM2
ACGTCAACACTATCTT	4.58917	LAM2
ACGTCAACACTCGACG	1.57413e-06	PLASM1
ACGTCAACAGGATCGA	4.31565e-06	PLASM1
ACGTCAAGTTCTGGTA	4.58692	LAM2
ACGTCAATCCTAAGTG	3.06074	LAM2
ACGTCAATCGAGAGCA	4.70393e-06	LAM2
ACGTCAATCGCATGGC	1.86749	PLASM1
ACGTCAATCGGCCGAT	1.38158e-05	PLASM1
ACTATCTAGAGTGAGA	4.24163	LAM3
ACTATCTGTCGAATCT	8.24074e-06	PLASM1
ACTATCTTCTACCTGC	1.96199	LAM2
ACTATCTTCTGGTATG	-5.69306e-06	PLASM1
ACTGAACAGAAGAAGC	1.34896	PLASM1
ACTGAACCAATAACGA	1.93691	PLASM1
ACTGAACGTATAATGG	1.72777	LAM1
ACTGAACGTCTCCCTA	4.21962	LAM2
ACTGAACGTGAGGGTT	4.23362	LAM3
ACTGAACTCTAAGCCA	4.58012	LAM2
ACTGAGTAGCGCCTCA	2.60408	LAM2
ACTGAGTGTGTGAAAT	4.55659	LAM2
ACTGAGTGTGTGGTTT	3.12961	LAM2
ACTGAGTTCTCATTCA	-8.12385e-06	PLASM1
ACTGAGTTCTTCAACT	2.27247	PLASM1
ACTGAGTTCTTGTTTG	2.12927	PLASM1
ACTGATGAGACGCACA	4.88613	LAM2
ACTGATGAGCTGATAA	2.35241	LAM2
ACTGATGCACGCCAGT	5.62398	LAM1
ACTGATGCATTCTTAC	4.40004	LAM3
ACTGATGGTAGCACGA	3.95677	LAM2
ACTGATGGTCAATACC	2.83948	PLASM1
ACTGATGGTGCACCAC	3.29701	LAM2
ACTGATGTCACCACCT	3.57315	LAM2
ACTGATGTCCATTCTA	2.64117	LAM2
ACTGCTCAGGGCACTA	4.17076	LAM2
ACTGCTCAGTGATCGG	3.72077	LAM3
ACTGCTCCAAGGTTTC	2.34058	PLASM1
ACTGCTCCACAGAGGT	3.82597	LAM2
ACTGCTCGTAGCTGCC	-1.2464e-05	LAM1
ACTGCTCGTTACCGAT	-3.34875e-07	LAM1
ACTGCTCTCGAATGCT	5.13418	LAM2
ACTGTCCAGAGCTATA	2.39427	PLASM1
ACTGTCCAGATAGCAT	3.92483	LAM2
ACTGTCCGTATTACCG	4.50881	LAM2
ACTGTCCGTGCAGGTA	3.46828	LAM3
ACTGTCCTCATGCTCC	4.7666	LAM2
ACTTACTAGAACAACT	2.76741	LAM2
ACTTACTAGGTAGCTG	5.41113	LAM2
ACTTACTAGTCGCCGT	-1.23671e-05	PLASM1
ACTTACTAGTGTGGCA	2.17669	LAM2
ACTTACTCAATGAAAC	4.0232	LAM2
ACTTACTCATCTCCCA	1.89129e-06	LAM2
ACTTACTCATTCCTGC	3.9504	LAM3
ACTTGTTCAGCTGGCT	4.41932	LAM3
ACTTGTTCAGTCCTTC	1.80938e-05	PLASM1
ACTTGTTTCGATCCCT	3.94248	LAM2
ACTTTCAAGTACGCCC	4.69592	LAM2
ACTTTCAAGTTTGCGT	4.44274	LAM1
ACTTTCACACGGATAG	3.71949	LAM2
ACTTTCACAGCGAACA	2.29732	LAM2
ACTTTCAGTCGCGTGT	1.92613	LAM1
ACTTTCAGTGAAAGAG	2.59462	PLASM1
ACTTTCATCTGCCAGG	2.15904	LAM1
AGAATAGAGTCTTGCA	1.95141	PLASM1
AGAATAGGTAAACCTC	1.38294	PLASM1
AGACGTTAGGCAGTCA	-7.34583e-07	PLASM1
AGACGTTCAAGCCCAC	-1.38703e-05	PLASM1
AGACGTTTCATTTGGG	2.19183	LAM2
AGACGTTTCTACGAGT	3.60859	LAM1
AGAGCGAAGAGTAATC	3.42772	PLASM1
AGAGCGAAGTCGAGTG	1.96107	LAM2
AGAGCGACATATGAGA	2.57898	PLASM1
AGAGCGATCAAGGCTT	2.21464	PLASM1
AGAGCTTAGTCGAGTG	3.43958	LAM2
AGAGCTTCACCTATCC	6.07106e-06	PLASM1
AGAGCTTCATCACAAC	2.75457e-06	PLASM1
AGAGCTTGTACGCTGC	2.84332	LAM2
AGAGCTTTCGGAGCAA	2.9191	LAM2
AGAGCTTTCGGTGTTA	4.69081	LAM3
AGAGCTTTCGTCCGTT	2.48922	PLASM1
AGAGTGGAGCTAAGAT	3.97672	LAM2
AGAGTGGAGGCAATTA	3.75121	LAM2
AGAGTGGCAATGTAAG	4.2218	LAM2
AGAGTGGCAGCTGCAC	3.53218	LAM3
AGAGTGGGTAGAAGGA	2.36729	PLASM1
AGAGTGGGTGATGCCC	2.15249	LAM1
AGAGTGGGTTATTCTC	3.71436	LAM1
AGAGTGGTCCTCAATT	4.4479	LAM1
AGAGTGGTCTGCCAGG	4.16878	LAM2
AGATCTGAGGCCCTTG	3.45811	LAM2
AGATCTGAGGTGACCA	3.3241	LAM1
AGATCTGAGTGCTGCC	5.46107	PLASM1
AGATCTGGTGCACGAA	1.51869	LAM2
AGATCTGGTGTCAATC	-3.36311e-06	LAM2
AGATCTGTCTCTTATG	2.54026	PLASM1
AGATCTGTCTTCGGTC	3.09149	LAM3
AGATTGCAGATACACA	2.97374	LAM2
AGATTGCGTCGGCACT	5.38259	LAM3
AGATTGCTCCAACCAA	2.04519	LAM2
AGATTGCTCGTGACAT	2.35194	LAM1
AGATTGCTCTCCCTGA	1.62844e-05	PLASM1
AGCAGCCAGCTTATCG	2.64212	PLASM1
AGCAGCCCAAGTAATG	6.40442	LAM3
AGCAGCCCAATAGCAA	4.3612	LAM3
AGCAGCCCAATCAGAA	1.31262	PLASM1
AGCAGCCCACTGTGTA	2.97818	PLASM1
AGCAGCCCATAAGACA	4.95512	LAM2
AGCAGCCGTCACTGGC	4.29257	LAM3
AGCAGCCGTCCATGAT	4.82959	LAM2
AGCAGCCTCAGTTCGA	4.29332	LAM2
AGCAGCCTCTCCTATA	1.50777	PLASM1
AGCATACAGCGGATCA	3.20428	LAM2
AGCATACAGTACTTGC	4.85941e-06	PLASM1
AGCATACCAAACAACA	5.98665	LAM3
AGCATACCACCCTATC	4.78637	LAM1
AGCATACCACTTCGAA	2.82242	LAM2
AGCATACCATGGAATA	1.31453	LAM3
AGCATACGTTATGCGT	2.22668	LAM2
AGCATACGTTTGGCGC	3.51103	LAM3
AGCCTAAAGCCTTGAT	6.8762e-06	PLASM1
AGCCTAAAGCGCTTAT	5.28917	LAM2
AGCCTAACAATCTGCA	4.33098	LAM2
AGCCTAACAATGGAAT	2.39977	PLASM1
AGCCTAAGTATTACCG	3.96886	LAM2
AGCCTAATCTTGCCGT	1.77553	PLASM1
AGCGGTCAGACAGACC	3.90933	LAM3
AGCGGTCAGCAATATG	3.9403	LAM2
AGCGGTCAGGGTTCCC	1.4687	PLASM1
AGCGGTCAGTGTTAGA	-2.55608e-06	PLASM1
AGCGGTCGTCATACTG	9.31033e-06	PLASM1
AGCGGTCGTTTGTGTG	1.33491e-05	PLASM1
AGCGGTCTCAGCTCTC	4.08374	LAM2
AGCGGTCTCGCAAACT	3.49088	LAM2
AGCGGTCTCTGTCTCG	4.90669e-07	PLASM1
AGCGGTCTCTTGAGGT	2.35003	PLASM1
AGCGTATAGTTTCCTT	2.58015	PLASM1
AGCGTATTCAAGGTAA	-2.43278e-08	PLASM1
AGCGTATTCATCATTC	6.55512e-06	LAM2
AGCGTATTCCACGCAG	2.72469	PLASM1
AGCGTCGAGATGAGAG	3.63671	LAM1
AGCGTCGAGTGGAGTC	-7.02439e-06	LAM1
AGCGTCGCAATAGAGT	-3.1143e-06	PLASM1
AGCGTCGCACATGTGT	3.49165	LAM2
AGCGTCGCATGTCTCC	6.22372	LAM3
AGCTCCTAGCTAACAA	4.68889	PLASM1
AGCTCCTCAGTGGGAT	4.47708	LAM2
AGCTCCTCATCTGGTA	4.89966	LAM2
AGCTCCTGTGGTAACG	3.1124	LAM2
AGCTCCTGTTCCGGCA	3.99168	LAM3
AGCTCCTGTTCGTTGA	5.27061	LAM1
AGCTCTCCAGGCGATA	4.82261	LAM2
AGCTCTCCATTTCAGG	4.42382	LAM3
AGCTCTCGTAGTGAAT	4.42103	LAM2
AGCTCTCGTCTCGTTC	5.25803	LAM3
AGCTTGAAGTATCTCG	3.00561	LAM2
AGCTTGACAACGATGG	5.30704e-07	PLASM1
AGCTTGACAGCCTATA	1.37412	PLASM1
AGCTTGAGTAAATGTG	4.74323	LAM2
AGCTTGAGTCGTGGCT	5.10141	LAM3
AGGCCACCAGTCAGAG	2.45056	LAM1
AGGCCACGTCCGAGTC	1.47166	PLASM1
AGGCCACGTCCTAGCG	-5.29386e-06	LAM2
AGGCCACTCACGGTTA	3.16582	LAM2
AGGCCACTCCTAGAAC	-1.54594e-05	PLASM1
AGGCCGTCAGCTTCGG	3.83747	LAM2
AGGCCGTGTTATCGGT	3.98422	LAM2
AGGCCGTTCACAATGC	1.93599	PLASM1
AGGCCGTTCGCGCCAA	4.57768	LAM3
AGGGAGTAGAAACCTA	3.78359	LAM2
AGGGAGTAGGCTAGAC	4.65137	LAM2
AGGGAGTCACGTAAGG	1.96638	LAM2
AGGGAGTCAGCTATTG	3.34503e-06	PLASM1
AGGGAGTGTTTGACAC	3.25451	LAM1
AGGGAGTTCACTGGGC	2.53509	PLASM1
AGGGATGAGTCTCCTC	1.68212	LAM2
AGGGATGCACCGATAT	2.97367	LAM3
AGGGATGGTGATGTCT	4.29791	LAM3
AGGGTGAAGACCGGAT	4.6185	LAM2
AGGGTGAAGAGACGAA	4.90792	LAM2
AGGGTGAAGTAGGTGC	1.56505	PLASM1
AGGGTGAAGTGAACAT	2.64528	PLASM1
AGGGTGACACTCAGGC	2.27816	PLASM1
AGGGTGACAGCTCCGA	2.83605	PLASM1
AGGGTGACATGATCCA	-4.03467e-06	LAM2
AGGGTGAGTGTTCTTT	4.95264	LAM2
AGGGTGAGTTAGATGA	5.39737	LAM2
AGGTCATAGAGCTTCT	2.12703	LAM1
AGGTCATAGCTAAACA	4.30138	LAM3
AGGTCATAGGCGCTCT	2.73125	LAM3
AGGTCATCACACAGAG	-7.95078e-06	LAM2
AGGTCATGTAGGCATG	5.07687	LAM3
AGGTCATGTCACTGGC	5.16102	LAM2
AGGTCATGTCAGATAA	4.04166	LAM3
AGGTCATGTCCTCTTG	4.09486	LAM2
AGGTCATTCAACTCTT	4.10743	LAM2
AGGTCCGCATATACGC	4.76582	LAM2
AGGTCCGCATGTAGTC	4.55763	PLASM1
AGGTCCGGTACAAGTA	5.3057	LAM2
AGTAGTCAGACCTAGG	4.74965	LAM2
AGTAGTCAGGACAGCT	4.33146	LAM2
AGTAGTCCAGCTCGAC	-9.05648e-08	PLASM1
AGTAGTCGTCTCCCTA	3.46771	LAM3
AGTAGTCGTGGTCCGT	2.4969	PLASM1
AGTAGTCTCGTGGGAA	6.37204	LAM2
AGTCTTTAGACTCGGA	4.8161	LAM3
AGTCTTTAGAGGTAGA	4.14069	LAM1
AGTCTTTAGCGATATA	3.72714	LAM2
AGTCTTTAGTTTAGGA	-2.83647e-06	LAM2
AGTCTTTCAATGGATA	3.202	LAM1
AGTCTTTCACATCCAA	2.45373	PLASM1
AGTCTTTGTCTCATCC	2.85798	LAM3
AGTGAGGAGACAGGCT	3.23677	LAM3
AGTGAGGAGCCGCCTA	1.16324	PLASM1
AGTGAGGAGGTGCACA	2.05919	PLASM1
AGTGAGGAGTGCAAGC	5.35845	LAM2
AGTGAGGCATTGAGCT	-2.43615e-06	PLASM1
AGTGAGGGTAAGTTCC	4.07773	LAM1
AGTGAGGGTCGGCTCA	4.07591	LAM2
AGTGAGGGTTCAGACT	4.52648	LAM2
AGTGAGGGTTCGGCAC	1.93813	LAM1
AGTGAGGTCATGCAAC	-1.78326e-06	LAM2
AGTGAGGTCGCTTGTC	-1.15136e-06	PLASM1
AGTGGGAAGAGTACAT	6.74704	LAM3
AGTGGGACACCAACCG	4.85732	PLASM1
AGTGGGAGTCCAGTTA	4.52369	LAM2
AGTGGGAGTCTCACCT	4.73094	LAM2
AGTGTCAAGTACGCGA	4.50685	LAM3
AGTGTCAGTAAGAGGA	2.06757	PLASM1
AGTGTCAGTGTTTGTG	1.21259e-06	LAM1
AGTGTCAGTTAAAGAC	3.63692	LAM3
AGTGTCAGTTCCATGA	1.74544	LAM2
AGTGTCATCACAGTAC	4.12569	LAM2
AGTGTCATCGCCTGTT	4.19994	LAM2
AGTTGGTAGACGACGT	3.18386	PLASM1
AGTTGGTCATAGAAAC	-7.20154e-06	PLASM1
AGTTGGTGTAGCCTCG	4.7269	LAM2
AGTTGGTGTCGCCATG	3.72469	PLASM1
AGTTGGTGTTACGTCA	-9.66956e-06	PLASM1
AGTTGGTGTTAGATGA	5.05111	LAM1
ATAACGCAGCGATCCC	2.0764	LAM2
ATAACGCCAGCGAACA	3.2751	LAM1
ATAACGCCAGGTCGTC	-4.12945e-06	LAM1
ATAACGCGTCACTGGC	-1.12898e-05	PLASM1
ATAACGCGTCATTAGC	1.15627	PLASM1
ATAACGCTCAGGTAAA	3.79833	LAM3
ATAAGAGAGCTGTCTA	2.04131e-05	PLASM1
ATAAGAGAGTGGCACA	3.32399	LAM2
ATAAGAGCACCTCGTT	1.9837	PLASM1
ATAAGAGGTCAGAATA	4.12176	LAM3
ATAAGAGTCACAACGT	2.16567	LAM2
ATAGACCAGCCAGTTT	3.39064	LAM2
ATAGACCAGCTACCGC	2.4892	PLASM1
ATAGACCAGGTAAACT	2.73399	PLASM1
ATAGACCGTAGGGACT	4.35507	LAM3
ATCACGAAGATCGGGT	3.58658	LAM1
ATCACGAGTCTAGCCG	2.04989	LAM2
ATCACGAGTGAGGCTA	5.53054	LAM2
ATCACGAGTTTAAGCC	3.05638	LAM1
ATCACGATCGAGAACG	3.4947	LAM3
ATCACGATCGCTTGTC	1.20027	PLASM1
ATCATCTAGCTGGAAC	3.35202	LAM1
ATCATCTAGGCTAGAC	2.21381	PLASM1
ATCATCTGTAGGGTAC	1.67143	PLASM1
ATCATCTGTCTCCCTA	5.68665	LAM1
ATCATCTGTGCCTGGT	5.64557	LAM3
ATCATCTTCAGCGATT	4.68367	LAM3
ATCATCTTCAGTCAGT	2.21012	LAM1
ATCATCTTCCTCCTAG	2.03117	LAM1
ATCATCTTCGTACGGC	4.83236	LAM2
ATCATGGAGACTAAGT	4.29502	LAM2
ATCATGGAGGAGCGAG	4.36243	LAM2
ATCATGGAGTTAGCGG	-3.47828e-06	PLASM1
ATCATGGCAGGACCCT	4.41414	LAM2
ATCATGGCATACAGCT	5.29044	LAM3
ATCATGGCATCGGAAG	2.53998	LAM3
ATCATGGGTTCTGTTT	4.96044	LAM2
ATCATGGTCATTTGGG	2.26721	PLASM1
ATCATGGTCTTACCTA	4.96259	LAM2
ATCCACCAGAGCAATT	4.35387	LAM1
ATCCACCAGATGTGTA	5.53648	LAM3
ATCCACCAGTAGCCGA	4.58655	LAM3
ATCCACCCAACGCACC	4.10331	LAM2
ATCCACCCACCTCGTT	2.40654	LAM1
ATCCACCCACGGTAAG	4.45758	LAM2
ATCCACCCAGCCTTGG	3.59114	LAM2
ATCCACCCAGTAAGCG	3.06556	PLASM1
ATCCACCGTCCTCTTG	3.64073	LAM3
ATCCACCTCCTCCTAG	3.07826	PLASM1
ATCCACCTCCTTAATC	1.89545	LAM2
ATCCGAAAGATGCCTT	4.03843	LAM1
ATCCGAAAGCGTGAGT	3.16456	LAM2
ATCCGAAAGGTGGGTT	4.33431	LAM1
ATCCGAACAGACAAGC	9.67262e-06	LAM1
ATCCGAAGTAGAAGGA	3.53987	LAM2
ATCCGAAGTGCAGACA	-1.5687e-05	LAM1
ATCCGAATCCAAACTG	4.81155	LAM2
ATCGAGTCAAACGCGA	5.39708	LAM2
ATCGAGTGTTCACCTC	5.13522	LAM3
ATCTACTAGAGCTTCT	4.40997	LAM2
ATCTACTAGCGATCCC	3.84628	LAM2
ATCTACTCACTGTTAG	3.317	LAM1
ATCTACTGTCTCCATC	3.80776	LAM2
ATCTACTGTTACCAGT	-9.31305e-06	PLASM1
ATCTACTTCTCAAACG	3.87098	LAM2
ATCTGCCAGAGCTTCT	3.00028	LAM2
ATCTGCCCACCGAAAG	2.09537	PLASM1
ATCTGCCGTAGCCTAT	2.05957	PLASM1
ATCTGCCTCTACTCAT	1.79053	LAM1
ATCTGCCTCTGCCCTA	3.81942	LAM1
ATGAGGGGTCGCCATG	4.24684	LAM2
ATGAGGGGTCTCATCC	1.90438	PLASM1
ATGAGGGGTGCTCTTC	3.56441	LAM1
ATGAGGGTCAACACTG	2.57339	PLASM1
ATGAGGGTCGGCGCTA	3.16827	LAM3
ATGCGATAGTGTTTGC	4.63319	LAM2
ATGCGATCAGCCAATT	-1.45965e-05	PLASM1
ATGCGATCATCCGTGG	5.43396	LAM2
ATGCGATGTCGAACAG	5.46468	LAM2
ATGCGATGTTAAAGAC	5.83997	LAM2
ATGCGATGTTTCGCTC	-2.33596e-08	LAM3
ATGCGATTCAGGCCCA	5.85627	LAM2
ATGCGATTCGAGAGCA	1.51947e-06	LAM2
ATGGGAGAGCTGCAAG	4.17147	LAM2
ATGGGAGAGTTTCCTT	4.01565	LAM2
ATGGGAGCAATTGCTG	4.23526	LAM3
ATGGGAGCATGACGGA	1.79382	PLASM1
ATGGGAGGTCGCATCG	2.14098	PLASM1
ATGTGTGAGGCATTGG	4.50263	LAM2
ATGTGTGCAACTTGAC	4.35616	LAM2
ATGTGTGGTATTCTCT	1.027e-05	PLASM1
ATGTGTGGTCGAACAG	-2.48483e-06	PLASM1
ATGTGTGTCCAAAGTC	3.59093	LAM1
ATTACTCAGACTTTCG	3.46822	LAM3
ATTACTCCAAACAACA	3.41861	LAM2
ATTACTCCAGCTCGAC	5.77334	LAM3
ATTACTCGTAGGCTGA	6.00432	PLASM1
ATTACTCGTGCAGTAG	3.91119	LAM2
ATTACTCTCATGTCTT	2.76048	LAM2
ATTACTCTCCGCGGTA	4.47197	LAM2
ATTACTCTCGTAGGTT	3.3211	LAM2
ATTACTCTCTGCAGTA	4.61285	LAM3
ATTACTCTCTTGTACT	4.54942	LAM2
ATTATCCAGTCAATAG	3.73668	LAM2
ATTATCCCAGATGGCA	3.69858	LAM2
ATTATCCGTGACCAAG	4.39845	LAM2
ATTCTACCATGCCTTC	2.1692	LAM2
ATTCTACGTACGAAAT	3.05995	PLASM1
ATTCTACGTGTCCTCT	9.53961e-06	PLASM1
ATTCTACGTGTGACCC	2.05643	PLASM1
ATTCTACTCATCGGAT	3.04929	LAM2
ATTGGACAGAGTAAGG	1.99011	LAM2
ATTGGACAGATATGCA	4.69459	LAM2
ATTGGACCATGGGAAC	-6.26575e-06	PLASM1
ATTGGACGTGTTTGGT	4.91133	LAM2
ATTGGACTCACAATGC	3.84398	LAM2
ATTGGACTCCCTAATT	3.4873	LAM2
ATTGGACTCTGCTTGC	3.17163	LAM2
ATTGGACTCTTTCCTC	3.73235	LAM1
ATTGGTGAGTAGATGT	5.47913	LAM2
ATTGGTGCACATCCGG	2.0386	LAM1
ATTGGTGCACGGTTTA	5.0244	LAM2
ATTGGTGGTACGCACC	3.59045	LAM3
ATTGGTGTCACTTACT	-2.307e-06	PLASM1
ATTTCTGCAATGGAAT	1.17224e-05	PLASM1
ATTTCTGCATCCGCGA	6.04094	LAM3
ATTTCTGGTCCAACTA	-6.61991e-06	LAM2
ATTTCTGGTTTGGCGC	5.15065	LAM2
ATTTCTGTCTGCGTAA	4.60995	LAM2
CAACCAAAGATCGATA	1.46999	PLASM1
CAACCAACATGCTAGT	3.64522	LAM1
CAACCAAGTCTCCCTA	4.50711	LAM2
CAACCAAGTGGCAAAC	1.71015	PLASM1
CAACCAATCACATGCA	-1.92813e-05	PLASM1
CAACCTCAGAGTGAGA	6.64391e-06	LAM2
CAACCTCAGTTTAGGA	-1.60254e-05	PLASM1
CAACCTCCAGAAGCAC	3.30897	LAM2
CAACCTCCATCGGAAG	4.9324	LAM2
CAACCTCTCTCATTCA	8.31238e-06	PLASM1
CAACCTCTCTCGGACG	2.51097e-06	PLASM1
CAACTAGCACAGGCCT	4.79854	LAM2
CAACTAGCACATAACC	8.44792e-06	PLASM1
CAACTAGCAGACGCTC	3.75288	LAM2
CAACTAGGTCTAGGTT	2.55708	LAM1
CAACTAGGTTCCGTCT	5.63776e-06	LAM1
CAACTAGTCACAGTAC	1.30336e-05	PLASM1
CAAGAAAAGACACTAA	3.3136	LAM3
CAAGAAAAGCCTTGAT	-6.06989e-06	LAM3
CAAGAAAAGTGGTCCC	3.11826	LAM1
CAAGAAACAATGGACG	3.98053	LAM2
CAAGAAACAGCTCGAC	6.94106e-06	PLASM1
CAAGAAACAGCTGGCT	2.74933	PLASM1
CAAGAAACAGTCAGAG	1.25691e-05	PLASM1
CAAGAAACATCTCGCT	2.07004	PLASM1
CAAGAAATCAGATAAG	4.28932	LAM3
CAAGAAATCAGGCGAA	2.71172	PLASM1
CAAGAAATCATGTAGC	1.373	PLASM1
CAAGAAATCCCTCAGT	3.30395	LAM2
CAAGATCCAATCGAAA	1.95798	LAM2
CAAGATCGTCAACTGT	4.43576	LAM2
CAAGATCGTTAAGAAC	3.82127	LAM3
CAAGGCCAGATCGGGT	4.53438	LAM2
CAAGGCCAGCCTATGT	4.89457e-06	LAM2
CAAGGCCAGCTGAACG	1.70935	LAM3
CAAGGCCCAGATGAGC	4.03509	LAM2
CAAGGCCCAGCGTTCG	4.1858	LAM2
CAAGGCCCATCAGTAC	-9.16456e-06	PLASM1
CAAGGCCGTCGTGGCT	4.47671	LAM2
CAAGGCCTCGATGAGG	4.75682	LAM2
CAAGGCCTCTAACTCT	1.88219	PLASM1
CAAGTTGAGAGACGAA	0.974921	PLASM1
CAAGTTGAGCGTGTCC	2.77219e-08	LAM2
CAAGTTGCAAGTTCTG	4.34269	LAM2
CAAGTTGGTAGGCATG	4.4791	LAM2
CAAGTTGGTGGCGAAT	2.57241	PLASM1
CAAGTTGGTTATCCGA	3.88172	LAM2
CAAGTTGTCACCTCGT	4.47257	LAM2
CACAAACAGAACAATC	2.59523	PLASM1
CACAAACAGCTAGCCC	4.40648	LAM2
CACAAACCAGTCTTCC	2.96483	LAM2
CACAAACCATCTATGG	6.49134	LAM3
CACAAACGTCTTGATG	4.95126	LAM3
CACACAAAGAGGGCTT	5.25815	LAM2
CACACAAAGCTTATCG	4.07737	LAM1
CACACAACAACAACCT	4.34012	LAM2
CACACAACAAGGACTG	2.43773	LAM2
CACACAACAATGAATG	3.36138	LAM3
CACACAACAATGGACG	2.05331	PLASM1
CACACAATCCATTCTA	-2.19279e-05	LAM1
CACACCTAGGAGCGAG	2.18343	PLASM1
CACACCTCACGTAAGG	6.1859	LAM2
CACACCTCATGAACCT	0.980566	PLASM1
CACACCTGTCATGCAT	5.01439	LAM2
CACACCTTCGAGAACG	1.66304	LAM3
CACACTCAGCCGCCTA	-3.25727e-06	PLASM1
CACACTCCAAGCCGCT	3.16259	LAM3
CACACTCCATCCGCGA	-6.35431e-06	LAM2
CACACTCGTGACGGTA	4.90878	LAM2
CACACTCGTGCTGTAT	2.26342	PLASM1
CACACTCGTTATGTGC	4.89083	LAM2
CACACTCTCAGCAACT	6.9194	LAM3
CACACTCTCCCAAGAT	1.55096	PLASM1
CACAGGCAGATAGCAT	1.72956e-05	PLASM1
CACAGGCAGCTCCTTC	4.01126	LAM2
CACAGGCAGGCTAGGT	1.91459	LAM2
CACAGGCAGTTTCCTT	4.9542	LAM2
CACAGGCCAAAGCAAT	2.54951	PLASM1
CACAGGCCAATAACGA	2.99435	LAM2
CACAGGCCAATGGACG	3.13872	LAM2
CACAGGCCATGGGACA	4.0959	LAM2
CACAGGCGTACTTCTT	4.13977	LAM2
CACAGGCGTCGATTGT	3.51376	PLASM1
CACAGGCGTCTAGCGC	2.56238	PLASM1
CACAGGCGTGGTTTCA	4.20994	LAM3
CACAGGCTCCCAACGG	2.19184	PLASM1
CACAGGCTCTCGGACG	3.21331	LAM2
CACAGTAAGTACGTTC	3.52826	LAM3
CACAGTAGTGGAAAGA	6.63877e-06	PLASM1
CACAGTAGTGGTACAG	3.78701	LAM3
CACAGTATCAGTGTTG	-6.96902e-06	LAM1
CACAGTATCATTGCGA	2.56295	PLASM1
CACAGTATCATTTGGG	2.63863	PLASM1
CACATAGAGAATTCCC	2.20889	PLASM1
CACATAGAGCGGATCA	4.90015	LAM2
CACATAGAGGACGAAA	4.1149	LAM2
CACATAGAGTGCGTGA	5.29536	LAM3
CACATAGAGTGTGGCA	2.27553	PLASM1
CACATAGCACAGTCGC	4.58905	LAM3
CACATAGCACTGCCAG	4.33715	LAM2
CACATAGGTCTTGTCC	4.39887	LAM1
CACATAGGTGACGCCT	5.71406	LAM2
CACATAGTCCTCCTAG	3.4324	LAM2
CACATTTAGAGGTTAT	3.0847	LAM2
CACATTTCACGTCAGC	2.67698	LAM2
CACATTTGTGCTGTAT	-1.78104e-05	PLASM1
CACATTTTCCAAACTG	5.18715	LAM1
CACCACTAGAAACGAG	5.94618	LAM3
CACCACTCAATTCCTT	-5.32833e-06	PLASM1
CACCACTCAATTGCTG	3.22633	LAM1
CACCACTCACCGTTGG	1.67752	PLASM1
CACCACTGTAAAGTCA	5.97389	LAM2
CACCACTGTCAAAGCG	5.48733	LAM2
CACCACTGTGACGCCT	4.2308	LAM2
CACCACTGTGGCAAAC	-3.407e-06	LAM2
CACCACTTCACAATGC	3.51079	LAM2
CACCACTTCCCAGGTG	6.00272	LAM3
CACCACTTCCGCAGTG	2.09043	PLASM1
CACCACTTCCTGCCAT	6.27115	LAM2
CACCACTTCGCGCCAA	1.29474e-05	PLASM1
CACCAGGAGAGCTTCT	4.19019	LAM2
CACCAGGCACCGCTAG	2.41844	PLASM1
CACCAGGCACCTTGTC	6.04604e-06	LAM1
CACCAGGGTGTGCGTC	2.51049	LAM2
CACCAGGTCGCCTGTT	3.23915	PLASM1
CACCTTGAGTCATCCA	2.6273	PLASM1
CACCTTGCAAGCGCTC	2.36007	PLASM1
CACCTTGCATCGGTTA	3.93026	LAM2
CACCTTGCATCTACGA	-4.99529e-06	PLASM1
CACCTTGTCCCTGACT	4.04367	LAM2
CACCTTGTCCTTCAAT	2.16566	PLASM1
CACTCCAAGATGTCGG	4.7189	LAM2
CACTCCAAGTTCCACA	5.42928	LAM3
CACTCCACAAGGTGTG	4.54635	LAM3
CACTCCACACACCGAC	1.45125	PLASM1
CACTCCACACCAGCAC	4.60953	LAM1
CACTCCAGTAGCTCCG	2.57361	LAM3
CACTCCAGTCGTTGTA	3.36756	LAM3
CACTCCAGTGATGATA	2.38168	LAM2
CACTCCAGTGTGAATA	3.90085	LAM2
CAGAATCAGGAGTTTA	2.34151	PLASM1
CAGAATCAGTCCCACG	-1.04744e-06	LAM3
CAGAATCAGTTCGCGC	2.05091	PLASM1
CAGAATCCACGTCAGC	2.05126	LAM2
CAGAATCGTACAGTGG	5.08654	LAM2
CAGAATCTCCACTGGG	5.38177	LAM1
CAGAGAGAGATCGGGT	7.65867e-06	LAM2
CAGAGAGAGTTGCAGG	4.80418	LAM2
CAGAGAGCATTGCGGC	2.49606	PLASM1
CAGATCAAGTCTCCTC	1.13014e-06	PLASM1
CAGATCACAAGCCATT	4.11032	LAM2
CAGATCACACATCTTT	2.3928	PLASM1
CAGATCACATCACGTA	3.07237	LAM3
CAGATCACATGCCTAA	3.23997	LAM2
CAGATCAGTCACTGGC	3.6741	LAM2
CAGATCAGTCTGCCAG	4.32648	LAM2
CAGATCATCGTAGGAG	4.7163	LAM3
CAGCAGCAGCACAGGT	1.7021	LAM3
CAGCAGCCACGCGAAA	4.32418	LAM2
CAGCAGCCATCCTAGA	3.33773	PLASM1
CAGCAGCGTATGGTTC	1.14109e-06	PLASM1
CAGCAGCGTCGAAAGC	2.31181	PLASM1
CAGCAGCTCAGCGATT	1.62755	PLASM1
CAGCAGCTCCACGAAT	3.32558	LAM2
CAGCAGCTCGTGTAGT	4.20905	LAM3
CAGCATAAGTAATCCC	3.06415	LAM2
CAGCATACACGAAGCA	3.40056	PLASM1
CAGCATAGTCGAACAG	-3.08938e-06	PLASM1
CAGCATATCCTTTCGG	3.27322	LAM2
CAGCATATCTTGTCAT	5.97398	LAM3
CAGCCGAAGAAGGCCT	1.30863e-05	PLASM1
CAGCCGAAGACCTAGG	5.0104e-06	PLASM1
CAGCCGAAGCAATATG	1.79558	LAM2
CAGCCGAAGGATGGTC	1.671e-05	PLASM1
CAGCCGAAGTTAACGA	1.01035e-05	PLASM1
CAGCCGACACAAGTAA	2.23521e-06	LAM2
CAGCCGAGTGCAACTT	1.87781	PLASM1
CAGCCGATCCAAATGC	3.09977	LAM1
CAGCGACAGATGGGTC	3.27921	LAM2
CAGCGACAGGGAAACA	2.99141	LAM2
CAGCGACAGGTCATCT	2.63293	LAM3
CAGCGACCAAGCTGAG	4.4816	LAM3
CAGCGACCAGGAACGT	-2.55382e-05	PLASM1
CAGCGACGTAGCGTGA	3.26781	LAM2
CAGCGACGTATCGCAT	-2.59563e-06	PLASM1
CAGCGACGTCAATGTC	4.15256	LAM2
CAGCGACTCAGTGCAT	6.39541	LAM2
CAGCGACTCATGTCCC	3.38908	LAM1
CAGCGACTCCTCTAGC	3.91847	LAM1
CAGCGACTCGCCAAAT	5.39366	LAM2
CAGCGACTCTCCAACC	4.43238	LAM3
CAGCGACTCTGATACG	4.73167	LAM3
CAGCGACTCTGGTATG	2.42989	LAM3
CAGCTAAAGGCTATCT	5.12569	LAM2
CAGCTAAAGTGAACGC	5.15026	LAM2
CAGCTAAAGTGTCCAT	5.66662	LAM1
CAGCTAACACTGCCAG	2.31684	LAM2
CAGCTAAGTATGAAAC	1.90932	PLASM1
CAGCTAATCCTGCTTG	3.488e-06	PLASM1
CAGCTAATCTGTACGA	-3.52898e-06	PLASM1
CAGCTGGAGACGCTTT	1.4769	PLASM1
CAGCTGGAGCGTGAAC	3.99526	LAM2
CAGCTGGCACATCCGG	7.23903e-06	PLASM1
CAGCTGGCAGGCAGTA	4.29057	LAM2
CAGCTGGGTCAGAATA	2.46273	PLASM1
CAGCTGGGTCGCGGTT	5.15631	LAM2
CAGCTGGGTCTGGTCG	4.97793e-07	LAM1
CAGCTGGTCACGACTA	-1.22768e-05	PLASM1
CAGCTGGTCAGTTCGA	4.80381	LAM1
CAGCTGGTCGCACTCT	2.36342	PLASM1
CAGCTGGTCGTACCGG	2.38144	PLASM1
CAGGTGCAGTGTTAGA	4.68965	LAM3
CAGGTGCCACAGGAGT	2.23906	PLASM1
CAGGTGCCACTGTCGG	1.57598	PLASM1
CAGGTGCGTCAATGTC	-2.55581e-06	LAM1
CAGGTGCGTCTTCGTC	1.44626	PLASM1
CAGGTGCGTTATCCGA	2.56975	LAM1
CAGTAACAGAAGGTGA	-3.2295e-06	LAM1
CAGTAACAGCACGCCT	5.17344	PLASM1
CAGTAACAGCCGGTAA	3.7926	LAM2
CAGTAACAGCTACCGC	3.10673	LAM3
CAGTAACCAAGCTGGA	-5.09765e-06	PLASM1
CAGTAACCAATAGAGT	3.41018	LAM1
CAGTAACGTACTTCTT	1.80865	PLASM1
CAGTAACTCTACCTGC	3.71707	LAM3
CAGTAACTCTACGAGT	4.45909	LAM3
CAGTAACTCTCTTGAT	3.67801	LAM1
CAGTCCTCAGCCTTTC	2.30931	LAM2
CAGTCCTCATCACGAT	5.02056	LAM3
CAGTCCTCATCATCCC	2.95123	LAM1
CAGTCCTGTAAGTGTA	1.80812	PLASM1
CAGTCCTGTCATCGGC	3.90481	LAM3
CAGTCCTGTCGAACAG	1.44798e-06	PLASM1
CAGTCCTGTCTTGTCC	1.9348	LAM1
CAGTCCTTCCCAAGTA	1.47591	PLASM1
CAGTCCTTCGAGAACG	2.83643	PLASM1
CAGTCCTTCGTAGGTT	1.0094e-06	LAM2
CAGTCCTTCTGCGTAA	6.14095	LAM3
CATATGGCATGCCTTC	-8.19825e-06	PLASM1
CATATGGTCGGAATCT	4.16125	LAM2
CATATTCAGCTTATCG	9.61371e-06	PLASM1
CATATTCCAACGATGG	3.44422	LAM2
CATATTCGTAGGCTGA	3.54783	LAM3
CATATTCTCGGAAACG	4.76595	LAM1
CATCAAGCAGGAATCG	1.90904e-05	PLASM1
CATCAAGCAGTTAACC	-7.77141e-06	PLASM1
CATCAAGCATGAAGTA	2.08277	PLASM1
CATCAAGGTAGCAAAT	1.83277	LAM1
CATCAAGGTTTAGCTG	2.29629e-06	PLASM1
CATCAAGTCCCTAACC	2.47967	LAM3
CATCAGAAGTTGTCGT	7.61366e-07	LAM2
CATCAGACAAGGACTG	2.36152	LAM2
CATCAGACAGTCGTGC	-1.91722e-06	PLASM1
CATCAGACATTGTGCA	1.45939e-05	LAM1
CATCAGAGTAAGGATT	2.18622	PLASM1
CATCAGAGTCTTTCAT	3.88732	LAM2
CATCCACAGAGTGACC	-1.0335e-05	PLASM1
CATCCACAGCTAGCCC	2.64074	LAM3
CATCCACGTCCGTTAA	4.64831	LAM2
CATCCACGTGCGAAAC	3.32654	LAM2
CATCCACTCGTGTAGT	1.28248e-05	LAM2
CATCCACTCTTTACAC	5.5912	PLASM1
CATCGAAAGCACACAG	3.48328	LAM2
CATCGAAAGGTGCAAC	4.33244	LAM2
CATCGAACACAGGTTT	2.07462	LAM2
CATCGAACACGGTGTC	-4.33931e-06	PLASM1
CATCGAACAGCGTCCA	2.17867e-05	PLASM1
CATCGAACATAAGACA	-2.95878e-05	LAM2
CATCGAAGTTAAGACA	8.08882e-07	PLASM1
CATCGAAGTTCGTGAT	3.83106	LAM1
CATCGAATCACGACTA	5.50362	LAM3
CATCGAATCCTTAATC	4.28853	LAM3
CATCGAATCTGCTGTC	4.77569	LAM3
CATCGGGAGAAGGTGA	2.2672	PLASM1
CATCGGGAGCGCTCCA	6.60664	LAM3
CATCGGGAGTGGTAGC	5.04038	LAM2
CATCGGGCATGCCTTC	1.93723	LAM2
CATCGGGGTATGAATG	2.79041	LAM3
CATCGGGGTGTCGCTG	2.37507	PLASM1
CATCGGGGTTGACGTT	1.91738e-06	LAM1
CATCGGGTCTATGTGG	2.12328	PLASM1
CATGACAAGTGGTCCC	5.58672	LAM3
CATGACACACAGTCGC	4.65611	LAM1
CATGACAGTAGTAGTA	-6.11767e-06	PLASM1
CATGACAGTCCGAAGA	1.82742	PLASM1
CATGACAGTCGCATAT	3.63914	PLASM1
CATGACAGTCTTCGTC	4.24228	LAM2
CATGACAGTTAAGACA	3.54621	LAM3
CATGACAGTTGATTGC	4.57792	LAM3
CATGCCTAGCGACGTA	5.46369	LAM2
CATGCCTAGGCTCATT	5.76681	LAM2
CATGCCTCACAAGACG	1.65709	PLASM1
CATGCCTCATGTAAGA	2.07887	LAM1
CATGCCTGTACCGAGA	4.44382	LAM2
CATGCCTTCGCCTGTT	3.55777	LAM1
CATGGCGAGAGCTATA	3.24899	LAM1
CATGGCGAGTTTAGGA	1.79658e-06	PLASM1
CATGGCGCAGCTGTAT	3.70576	LAM2
CATGGCGCATTTCACT	6.38362	LAM3
CATGGCGGTGGTACAG	9.68899e-06	PLASM1
CATGGCGGTGTTCTTT	4.63611	LAM2
CATGGCGTCTCCAGGG	3.88165	LAM3
CATTATCAGCCGATTT	-1.52283e-05	LAM2
CATTATCCAAAGTCAA	2.76277	LAM2
CATTATCTCGGTCTAA	1.55226	PLASM1
CATTCGCAGAAGGTGA	3.48194e-08	PLASM1
CATTCGCAGCGAAGGG	1.46123	PLASM1
CATTCGCAGGGCATGT	5.6057	LAM2
CATTCGCCAGTTTACG	3.48058	LAM2
CATTCGCGTTCCATGA	4.28967	LAM2
CATTCGCTCTGAGGGA	3.55749	LAM2
CCAATCCAGACCACGA	4.83358	LAM2
CCAATCCAGTACCGGA	4.78375	LAM2
CCAATCCAGTCCGTAT	3.60565	LAM1
CCAATCCCACAGGAGT	2.8456	PLASM1
CCAATCCGTCACAAGG	-1.15229e-05	PLASM1
CCAATCCGTGATGCCC	2.91911	PLASM1
CCAATCCTCTTGCAAG	4.20571	LAM2
CCACCTAAGAGGGATA	2.02181	PLASM1
CCACCTAAGCGTTGCC	4.60252	LAM3
CCACCTAAGGGCTTCC	1.29947e-05	PLASM1
CCACCTACAATGGACG	5.02082	PLASM1
CCACCTACACGCTTTC	3.4713	LAM2
CCACCTACAGGAATGC	3.99502	LAM3
CCACCTACATGCTGGC	5.88803	LAM2
CCACCTATCCGTTGTC	-7.26161e-06	PLASM1
CCACCTATCCTAGTGA	3.12862	LAM2
CCACGGAAGCCAGTTT	3.21812	LAM2
CCACGGAAGCGAGAAA	2.32472	LAM2
CCACGGAAGGTGATAT	3.21062	LAM1
CCACGGACACTTCGAA	-8.33998e-06	PLASM1
CCACGGACATCCGGGT	1.41913e-05	PLASM1
CCACGGACATGACGGA	4.75982	LAM2
CCACTACAGCACCGCT	-1.61358e-05	PLASM1
CCACTACCAAGGTGTG	4.04474	LAM2
CCACTACCATATGAGA	1.73296e-05	PLASM1
CCACTACGTAACGCGA	1.9345e-05	PLASM1
CCACTACGTCCGAAGA	1.97579	PLASM1
CCACTACTCCAGGGCT	5.34163	LAM2
CCAGCGACACCGGAAA	1.85103	LAM1
CCAGCGAGTGCCTGGT	1.95983	PLASM1
CCAGCGATCAGTGCAT	3.7666	LAM2
CCATGTCCAAGTAGTA	3.4253	LAM1
CCATGTCCATACTACG	5.61833	LAM2
CCATGTCTCACCACCT	3.64549	LAM2
CCATGTCTCCTATTCA	5.2332	LAM2
CCATTCGCATACTCTT	4.69548	LAM3
CCATTCGGTACAGACG	4.00295	LAM1
CCATTCGGTCATGCCG	3.39186	LAM2
CCATTCGGTCGTTGTA	3.29437	LAM2
CCATTCGGTTGGTGGA	9.15592e-06	PLASM1
CCATTCGTCAGGATCT	5.33926	LAM3
CCATTCGTCCTGTAGA	7.63825e-06	PLASM1
CCCAATCAGTTTGCGT	2.3164	PLASM1
CCCAATCGTCCCTACT	2.36391	LAM2
CCCAATCGTGTAATGA	1.05983e-05	PLASM1
CCCAGTTAGAACAACT	1.05511e-05	PLASM1
CCCAGTTAGTGCGTGA	2.52343	LAM2
CCCAGTTCACGGACAA	3.91921	LAM2
CCCAGTTGTAAGTGGC	1.68462e-05	LAM2
CCCAGTTGTGGTGTAG	3.59008	LAM3
CCCAGTTTCAGTCCCT	4.36452	LAM3
CCCAGTTTCTTGTACT	1.81958	LAM1
CCCATACAGACGACGT	5.24122e-06	PLASM1
CCCATACCAGAGCCAA	2.56297	PLASM1
CCCATACCATGACATC	2.24438	LAM2
CCCATACGTACAAGTA	2.2542	PLASM1
CCCATACGTGTTCGAT	6.05563	LAM2
CCCATACGTGTTGAGG	3.37021	LAM2
CCCATACGTTCTGAAC	3.48771	LAM3
CCCTCCTAGTGTGAAT	2.71339	LAM1
CCCTCCTCACACCGCA	7.98585e-06	LAM1
CCCTCCTGTACGCACC	1.58998	PLASM1
CCCTCCTGTGCGATAG	2.64116	LAM2
CCCTCCTTCGTCCAGG	3.51308	PLASM1
CCCTCCTTCTGCGTAA	-5.44355e-06	PLASM1
CCCTCCTTCTTTAGTC	2.29845	LAM2
CCGGGATCAGGTTTCA	4.70158	LAM2
CCGGGATGTCAACTGT	-1.22751e-05	PLASM1
CCGGGATTCAGGATCT	3.01669	LAM2
CCGGGATTCCGCGGTA	1.67339	PLASM1
CCGGTAGAGCTACCTA	-2.06126e-06	PLASM1
CCGGTAGAGGGCTTCC	1.44187e-05	PLASM1
CCGGTAGCACATGGGA	4.21107	LAM2
CCGGTAGCACTAGTAC	4.88792	LAM2
CCGGTAGCAGTGGAGT	4.10719	LAM2
CCGGTAGCATGTAGTC	4.76141	LAM3
CCGGTAGGTACACCGC	1.91519	PLASM1
CCGGTAGGTATTAGCC	4.63611	LAM2
CCGGTAGGTCGTCTTC	5.60514	LAM2
CCGGTAGGTTACCAGT	3.11385	LAM2
CCGGTAGGTTTGACTG	4.56181	LAM2
CCGTACTCAGCTCGCA	2.88793e-06	LAM2
CCGTACTCATGCTGGC	2.56827	PLASM1
CCGTACTGTTGCCTCT	3.63597	LAM2
CCGTACTTCGGTTCGG	3.50215	LAM2
CCGTACTTCTCTGCTG	-5.28644e-06	PLASM1
CCGTGGAAGCGTCTAT	2.04405	PLASM1
CCGTGGAAGGGTTCCC	1.62016e-05	PLASM1
CCGTGGAAGGTCGGAT	-1.78951e-07	PLASM1
CCGTGGAAGGTGATAT	4.46069	LAM1
CCGTGGAAGTCTCCTC	-8.4456e-06	PLASM1
CCGTGGAGTGACAAAT	3.91157	LAM2
CCGTGGATCCTTGCCA	-9.0009e-06	LAM2
CCGTGGATCGGCGCTA	4.71362	LAM3
CCGTGGATCGTTACGA	2.5411	LAM3
CCGTGGATCGTTTAGG	2.53282	PLASM1
CCGTTCAGTCTAAAGA	6.60042e-06	PLASM1
CCGTTCAGTCTACCTC	4.55775	LAM2
CCGTTCATCCCAGGTG	2.79017	LAM2
CCGTTCATCTCTTATG	-8.12182e-06	PLASM1
CCTAAAGAGTATCTCG	4.3525	LAM2
CCTAAAGCAGACACTT	3.73534	LAM2
CCTAAAGTCAGTACGT	3.18854	PLASM1
CCTAAAGTCTTAGAGC	4.69546	LAM2
CCTACACCAAACAACA	6.18984e-06	PLASM1
CCTACACCACATTTCT	4.31134e-06	PLASM1
CCTACACGTTTCGCTC	3.76959	LAM2
CCTACACTCCTTTCGG	2.23633	PLASM1
CCTACCACACACCGCA	1.66189e-05	PLASM1
CCTACCACAGATGGGT	-1.05503e-05	LAM2
CCTACCATCAGTTCGA	4.16612	LAM2
CCTACCATCGGCCGAT	4.54173	LAM2
CCTACCATCTCTTGAT	4.18973	LAM1
CCTACCATCTTACCGC	4.60417	LAM2
CCTAGCTAGAAACGAG	3.99239	PLASM1
CCTAGCTAGTACGATA	2.91622	PLASM1
CCTAGCTCACGTTGGC	3.45943	PLASM1
CCTAGCTGTACCGTTA	4.13832e-07	PLASM1
CCTAGCTTCGTTGCCT	-1.73773e-05	PLASM1
CCTATTAAGATATGCA	4.65872	LAM3
CCTATTAAGTGGGCTA	4.49182	LAM1
CCTATTACAAGCTGGA	2.75429	PLASM1
CCTATTACACCAGGTC	2.7603	LAM2
CCTATTAGTAAACGCG	4.1665	LAM2
CCTATTAGTAGGAGTC	3.24808	LAM2
CCTATTAGTCTAGAGG	4.78699	LAM2
CCTCAGTCAACACCCG	3.77947	LAM2
CCTCAGTCACGAAGCA	2.58857	LAM2
CCTCAGTCATAAAGGT	-2.03338e-05	PLASM1
CCTCAGTTCACAAACC	3.1286	LAM2
CCTCTGAAGATGTAAC	-8.57251e-06	LAM2
CCTCTGACACAGAGGT	4.30979	LAM2
CCTCTGACACGTCTCT	-2.84836e-06	PLASM1
CCTCTGATCCCTAACC	3.8021	LAM2
CCTCTGATCGTAGGAG	4.75389	LAM1
CCTTACGAGTGTACGG	2.76885	LAM3
CCTTACGCAATCGAAA	4.2267	LAM2
CCTTACGCAGCGAACA	-3.97921e-06	PLASM1
CCTTACGCAGTAACGG	2.61546	PLASM1
CCTTACGCAGTCCTTC	3.51283	LAM3
CCTTACGCATCGTCGG	1.94389	LAM2
CCTTACGGTGGTCCGT	4.09982	LAM1
CCTTACGTCATCGATG	5.96427	LAM3
CCTTCCCAGTACACCT	1.73595	LAM1
CCTTCCCAGTCCATAC	1.1229	PLASM1
CCTTCCCCAATGAATG	3.28373	LAM3
CCTTCCCCACGCTTTC	1.87391	PLASM1
CCTTCCCCAGTTCATG	1.26467e-05	PLASM1
CCTTCCCGTCAATGTC	4.44345	LAM2
CCTTCCCGTTTGTTGG	5.42289	LAM2
CCTTCCCTCCTGTAGA	3.64093	LAM3
CCTTCCCTCTTGAGAC	3.60022	PLASM1
CCTTCGAAGCTGAAAT	2.00662	LAM2
CCTTCGAAGGCCCGTT	4.86942	LAM2
CCTTCGACAGTGACAG	-1.10415e-06	LAM2
CCTTCGACATTGGTAC	3.66754	LAM2
CCTTCGAGTCAATACC	4.34932	LAM3
CCTTCGAGTCCGCTGA	5.10569	LAM2
CCTTCGAGTCGGCACT	5.51063	LAM3
CCTTCGAGTGGTTTCA	1.87476	PLASM1
CCTTTCTAGCGCTCCA	9.16282e-06	LAM1
CCTTTCTCAAGCCTAT	-7.2438e-06	LAM1
CCTTTCTCAATGACCT	6.86779e-06	PLASM1
CCTTTCTCAGCATACT	4.50086e-06	PLASM1
CCTTTCTGTACTCGCG	2.87247	PLASM1
CCTTTCTTCGCATGGC	2.41819	LAM1
CCTTTCTTCTCCCTGA	4.89011	LAM2
CCTTTCTTCTGCTGTC	8.02499e-06	PLASM1
CGAACATAGGGAACGG	3.68228	LAM2
CGAACATAGTACCGGA	1.91313	LAM1
CGAACATGTAGCGCAA	4.53473	LAM3
CGAACATGTATTAGCC	6.25761	LAM3
CGAACATGTCTTGTCC	3.62054	LAM2
CGAACATGTTGTGGAG	2.92987	PLASM1
CGAACATTCCTTCAAT	2.81343	PLASM1
CGAATGTAGTACTTGC	3.27981	LAM3
CGAATGTAGTGTCTCA	4.8078	LAM3
CGAATGTCACCGTTGG	4.29643	LAM2
CGAATGTCACGAAATA	1.33994	LAM2
CGAATGTGTAGCTTGT	1.70143	PLASM1
CGAATGTGTGCGCTTG	5.50702	LAM3
CGAATGTTCCAATGGT	3.90527	LAM2
CGAATGTTCTTCTGGC	4.66959	LAM2
CGACCTTCAGCTGTTA	4.1867	PLASM1
CGACCTTGTTGGTGGA	1.59657e-05	PLASM1
CGACTTCCAGGAATGC	5.00034	LAM2
CGACTTCTCACTTACT	-7.9488e-06	LAM2
CGAGAAGAGTAACCCT	4.22867	LAM2
CGAGAAGGTCGACTGC	3.24911	LAM2
CGAGAAGGTGGTCTCG	5.50666	LAM2
CGAGAAGTCGCCCTTA	5.90988e-06	PLASM1
CGAGCACAGACTACAA	3.74159	LAM3
CGAGCACAGCCGTCGT	6.63329	LAM2
CGAGCACAGTCTCGGC	5.68182	LAM3
CGAGCACCAAGGACTG	9.51313e-06	PLASM1
CGAGCACCACACTGCG	4.11232	LAM2
CGAGCACTCAGATAAG	3.41626	PLASM1
CGAGCACTCCTTTCTC	4.73676	LAM2
CGAGCACTCGTTACGA	4.55092	LAM2
CGAGCCAAGGGAACGG	4.14493	LAM3
CGAGCCAAGTATCGAA	2.98579	PLASM1
CGAGCCACAACCGCCA	2.771	LAM2
CGAGCCACACGACGAA	2.46756	LAM3
CGAGCCAGTGTGACCC	2.57659	PLASM1
CGAGCCAGTTGTGGAG	6.73067e-06	PLASM1
CGAGCCATCGTTACGA	2.63371e-05	PLASM1
CGAGCCATCTAACTGG	1.66114e-06	LAM1
CGATCGGCACTGTGTA	4.74194	LAM1
CGATCGGCAGGAATCG	2.63768	LAM2
CGATCGGCAGTATGCT	-1.45902e-05	PLASM1
CGATCGGGTGACGCCT	3.79172	LAM1
CGATCGGGTGTGAATA	2.12702	LAM2
CGATGGCAGACTTGAA	3.79102	LAM2
CGATGGCAGAGGGATA	1.47213	PLASM1
CGATGGCAGGATGCGT	5.55715	LAM1
CGATGGCCAAGGACAC	2.63737	PLASM1
CGATGGCGTCGAATCT	-2.87097e-06	PLASM1
CGATGGCGTTGTTTGG	0.970608	PLASM1
CGATGGCTCAGTTAGC	3.02553	LAM2
CGATGGCTCATCGGAT	-5.75618e-06	PLASM1
CGATGTAAGGAGTAGA	4.33571	LAM3
CGATGTAAGGTAGCTG	3.46294	LAM2
CGATGTACACACAGAG	1.39634e-07	PLASM1
CGATGTACAGCGAACA	4.77638	LAM2
CGATGTACATAAGACA	3.38732	PLASM1
CGATGTAGTCTGATTG	3.02272e-07	LAM2
CGATGTAGTTAGGGTG	2.71674e-06	PLASM1
CGATGTATCTAAGCCA	3.25101	LAM2
CGATTGAAGATATGCA	5.55839	LAM2
CGATTGAAGATCCCGC	-1.11202e-05	PLASM1
CGATTGAAGCAGATCG	3.58608	LAM3
CGATTGAGTCAGAATA	4.85855	LAM2
CGATTGAGTGACAAAT	1.71322	LAM2
CGATTGATCCATTCTA	3.67226	LAM3
CGCCAAGAGGAATGGA	3.69406	LAM2
CGCCAAGAGGCGTACA	5.0869	LAM3
CGCCAAGGTACTTGAC	-1.53789e-05	PLASM1
CGCCAAGGTTGAGGTG	4.21167	LAM3
CGCCAAGTCAGTCAGT	2.18303	LAM1
CGCGGTAAGTTAACGA	5.50161	LAM1
CGCGGTACAATACGCT	2.92198	LAM2
CGCGGTACACATCTTT	3.73255	LAM2
CGCGGTAGTAGAGTGC	3.68667	LAM1
CGCGGTATCAACACCA	1.64342	LAM2
CGCGGTATCAAGAAGT	4.60456	LAM2
CGCGTTTAGAATGTGT	4.86721	LAM2
CGCGTTTCACGTTGGC	4.61573	LAM1
CGCGTTTGTCCAGTTA	4.28128	LAM2
CGCGTTTGTCTGATTG	5.08574	LAM2
CGCGTTTGTGGTTTCA	4.12303	LAM3
CGCGTTTTCAGAAATG	4.46496	LAM2
CGCGTTTTCTTGTCAT	-7.46516e-06	PLASM1
CGCGTTTTCTTTAGGG	4.51613	LAM2
CGCTATCAGGGCATGT	4.34686	LAM2
CGCTATCAGTGTTTGC	3.31198	LAM2
CGCTATCCAAGGGTCA	1.65413	PLASM1
CGCTATCCACGAAATA	9.33388e-06	PLASM1
CGCTATCCATACCATG	5.05669	LAM2
CGCTATCGTATCAGTC	1.72799e-05	PLASM1
CGCTATCGTGACGGTA	3.73155	LAM2
CGCTATCGTTCTGAAC	-5.7036e-06	LAM2
CGCTGGAAGGCCCTTG	2.43643	PLASM1
CGCTGGACAAGCGTAG	9.05064e-06	PLASM1
CGCTGGACAAGGTGTG	4.78772	LAM2
CGCTGGACACTTGGAT	1.07809e-05	PLASM1
CGCTGGACATATGAGA	6.39751	LAM3
CGCTGGATCCACTGGG	1.64675	LAM2
CGCTTCACAAAGTCAA	6.45101	LAM2
CGCTTCACAGTTTACG	1.38477	PLASM1
CGCTTCAGTAACGACG	4.36479	LAM2
CGCTTCAGTCAATACC	2.05436	PLASM1
CGCTTCAGTTCACCTC	3.8784	LAM2
CGCTTCAGTTCCCGAG	3.06416	LAM1
CGGACACAGATGGGTC	2.47525	PLASM1
CGGACACCAAAGAATC	3.06043	PLASM1
CGGACACCACGCTTTC	3.18055	LAM2
CGGACACGTACCGAGA	4.3921	PLASM1
CGGACACGTTGCCTCT	3.63748	PLASM1
CGGACACTCACTTCAT	2.69677	LAM2
CGGACACTCGGAGGTA	3.61425	LAM2
CGGACACTCGTGGACC	2.90931	PLASM1
CGGACGTAGATCGATA	-1.50852e-05	PLASM1
CGGACGTAGGATGGAA	6.27035	LAM3
CGGACGTCAGTCACTA	5.24168e-06	PLASM1
CGGACGTGTACGAAAT	2.17551	LAM1
CGGACGTTCATCGATG	1.84219	PLASM1
CGGACGTTCCCTAACC	3.56813	LAM2
CGGACTGGTCAAAGCG	2.82167	LAM2
CGGACTGGTGACGCCT	-4.98981e-07	PLASM1
CGGACTGTCGCCATAA	3.20799	LAM3
CGGAGCTAGGACACCA	1.95612	LAM2
CGGAGCTCAGGGCATA	2.92091	LAM2
CGGAGCTCAGTGAGTG	2.60928	LAM3
CGGAGCTCATGCTAGT	-5.64357e-08	PLASM1
CGGAGCTGTAGAGCTG	1.06123	PLASM1
CGGAGCTGTCAAACTC	-5.47074e-06	LAM2
CGGAGCTTCTATCCTA	4.959	PLASM1
CGGAGTCAGGCTAGCA	1.05222e-05	LAM2
CGGAGTCCACCAACCG	3.51117	LAM3
CGGAGTCCACCCTATC	4.50137	LAM2
CGGAGTCCATTATCTC	5.45524	LAM2
CGGAGTCCATTGCGGC	2.59917	LAM2
CGGAGTCGTGCTTCTC	-3.88179e-06	PLASM1
CGGAGTCTCAGGCCCA	5.66275	LAM3
CGGAGTCTCCAGATCA	2.36295	LAM1
CGGAGTCTCGAGAACG	1.38521	PLASM1
CGGAGTCTCGCCTGAG	4.05717	LAM1
CGGAGTCTCGGAATCT	2.64563	LAM2
CGGAGTCTCGTTACGA	-1.57797e-05	LAM2
CGGAGTCTCTCAAGTG	3.91743	LAM3
CGGCTAGAGGTGCACA	5.94998	LAM2
CGGCTAGCACATGGGA	3.25011	LAM2
CGGCTAGCATGCCACG	3.38567	LAM2
CGGCTAGGTAAGAGGA	1.51942e-05	LAM1
CGGCTAGGTACAAGTA	5.23408	LAM2
CGGCTAGGTTCCATGA	1.80812	LAM2
CGGCTAGTCGGTGTCG	4.5622	LAM2
CGGGTCAAGCGTAGTG	4.70456	LAM3
CGGGTCAAGGTTCCTA	4.54755	LAM2
CGGGTCAAGTACGATA	7.60167	LAM3
CGGGTCATCTGCCAGG	5.45288	LAM2
CGGTTAAAGAATAGGG	3.28388	LAM3
CGGTTAACAGTCGTGC	1.76896	PLASM1
CGGTTAAGTACTTGAC	4.41406	LAM3
CGGTTAAGTCTCCATC	2.82996	LAM1
CGGTTAATCACCGTAA	3.19689	LAM2
CGGTTAATCGATCCCT	5.49943	LAM3
CGGTTAATCTCACATT	2.53359e-07	LAM2
CGTAGCGAGGAATGGA	2.74935	PLASM1
CGTAGCGAGTGCCAGA	3.4425	LAM1
CGTAGCGAGTGTCTCA	4.30037	LAM3
CGTAGCGCAATAAGCA	2.73653	LAM2
CGTAGCGCATTCGACA	3.88229	LAM3
CGTAGCGGTGTCAATC	2.89641e-06	PLASM1
CGTAGGCAGGCATGGT	3.04156	PLASM1
CGTAGGCCAAACGTGG	4.21676	LAM3
CGTAGGCGTCGCGAAA	-2.87493e-07	PLASM1
CGTAGGCGTGAGGGAG	3.32676	LAM2
CGTAGGCGTTCTCATT	-1.12927e-05	LAM2
CGTCACTAGAGTACCG	4.03607	LAM1
CGTCACTAGGGAAACA	3.97522	LAM3
CGTCACTAGTTCGCGC	5.86539	LAM2
CGTCACTCAGCCTATA	2.71782	LAM3
CGTCACTCATGCGCAC	3.30075	LAM1
CGTCACTGTAGTGAAT	3.11233e-06	PLASM1
CGTCACTGTTTAAGCC	5.29832	LAM3
CGTCAGGAGATCTGAA	4.139	LAM1
CGTCAGGAGTGCAAGC	3.27172	LAM2
CGTCAGGGTAATTGGA	1.62878	PLASM1
CGTCAGGGTACTCGCG	5.37277	LAM3
CGTCAGGGTATCTGCA	3.37403	LAM2
CGTCCATAGCGTAATA	-1.18555e-05	PLASM1
CGTCCATCATGTCCTC	4.82633	LAM2
CGTCCATGTAAGGATT	3.13358	LAM2
CGTCCATGTACCGTAT	3.88346	LAM3
CGTCCATGTGCCTGGT	5.21643	LAM2
CGTCCATGTTGTCTTT	2.47184	LAM2
CGTCCATTCGCATGAT	7.549e-06	LAM2
CGTCTACCACTGCCAG	1.93792	PLASM1
CGTCTACCAGGGAGAG	2.5634	LAM3
CGTCTACGTGAGTATA	5.33581	LAM1
CGTCTACTCCGAATGT	3.32052	LAM2
CGTCTACTCGTCGTTC	3.41971	LAM3
CGTCTACTCTGCCAGG	5.80035	LAM2
CGTGAGCCAGCTCGCA	4.76399	LAM1
CGTGAGCCATGCCTAA	3.68999	LAM3
CGTGAGCGTAAATGAC	5.0738	LAM2
CGTGAGCGTTAAAGTG	2.11769	PLASM1
CGTGAGCTCCTTTACA	2.55156	LAM3
CGTGAGCTCTGCCCTA	5.26747	LAM3
CGTGTAAAGTGCGTGA	2.17945	PLASM1
CGTGTCTTCAGGCGAA	4.03601	LAM2
CGTTAGAAGCGTAGTG	2.2393	LAM3
CGTTAGATCCGAACGC	3.61643	LAM3
CGTTCTGAGCCTATGT	7.44221e-06	PLASM1
CGTTCTGCACACCGCA	3.21383	PLASM1
CGTTCTGCATGTCGAT	5.07793	LAM2
CGTTCTGGTCGACTGC	2.27595	PLASM1
CGTTCTGTCCGCGCAA	2.26113	LAM2
CGTTCTGTCGCCCTTA	4.69112	LAM2
CGTTCTGTCGGTTAAC	2.60317	LAM2
CGTTGGGCACACTGCG	2.40479	LAM2
CGTTGGGCATGCCCGA	3.59604	LAM3
CGTTGGGGTATTAGCC	4.08131	LAM2
CGTTGGGGTGCACCAC	5.91545e-06	PLASM1
CGTTGGGTCAGGATCT	4.67297	LAM2
CTAACTTAGCCCAACC	5.00708	LAM3
CTAACTTAGGTGACCA	5.8899	LAM2
CTAACTTAGTCTCCTC	1.86972	PLASM1
CTAACTTAGTGGTAGC	1.42093	PLASM1
CTAACTTCAACACGCC	1.22437	LAM3
CTAACTTCAAGCCGTC	8.93504e-07	PLASM1
CTAACTTCACGCGAAA	4.13553	LAM3
CTAACTTCACTTCGAA	3.16377	LAM2
CTAACTTTCCACTGGG	4.59074	PLASM1
CTAACTTTCCCTCTTT	4.50362	LAM2
CTAAGACAGCGATATA	4.68107	LAM2
CTAAGACAGTATTGGA	-2.53508e-05	LAM1
CTAAGACAGTTTCCTT	7.0133	LAM2
CTAAGACCAAAGGTGC	5.73547	LAM2
CTAAGACCAGACAAGC	2.83054	LAM3
CTAAGACCATATGGTC	2.12964	LAM2
CTAAGACCATTACCTT	-1.45769e-06	LAM1
CTAAGACGTACGCACC	3.34866	PLASM1
CTAAGACGTGCACCAC	-4.91091e-06	PLASM1
CTAAGACGTTTCCACC	4.65648	LAM2
CTAAGACTCGTGGACC	4.86275	LAM2
CTAAGACTCTCAAACG	5.85311	LAM2
CTAATGGAGGAGCGAG	4.31787	LAM2
CTAATGGAGTTAACGA	5.26202	LAM2
CTAATGGCATAGGATA	2.85527	LAM1
CTAATGGGTATGAATG	5.57843	LAM2
CTAATGGGTCATATCG	3.99293	LAM3
CTAATGGTCATGTAGC	1.34602e-05	LAM1
CTAATGGTCCACTCCA	2.91194	LAM3
CTACACCCAAAGAATC	4.19102	PLASM1
CTACACCCAAGACGTG	-9.08487e-06	PLASM1
CTACACCCACCGATAT	3.77271	LAM2
CTACACCCATCATCCC	-5.01038e-06	PLASM1
CTACACCGTGCGAAAC	2.41539	PLASM1
CTACACCTCAGCACAT	-1.87522e-05	PLASM1
CTACATTCAAGCGTAG	1.58547e-06	PLASM1
CTACATTGTCCAAGTT	2.52315	PLASM1
CTACATTGTTAAGACA	4.03592	LAM2
CTACATTTCTCATTCA	4.08734	LAM3
CTACCCAAGAGAGCTC	4.29338	LAM2
CTACCCAAGAGGTACC	3.78019	LAM2
CTACCCAAGGTCGGAT	1.75695	PLASM1
CTACCCAAGTGGAGAA	3.84949e-06	LAM1
CTACCCAGTAGCGATG	4.27193	LAM2
CTACCCAGTCAACTGT	3.96649	LAM2
CTACCCAGTTGTGGAG	3.40684	LAM2
CTACCCATCCAGATCA	3.12367	LAM2
CTACGTCAGAGACTTA	3.4084	LAM3
CTACGTCCAATGTTGC	1.85622	PLASM1
CTACGTCCACGTCTCT	3.94684	LAM2
CTACGTCCAGGTCTCG	4.32767	LAM3
CTACGTCGTAGCCTAT	3.45451	LAM2
CTACGTCGTAGGCATG	-7.05618e-06	PLASM1
CTACGTCTCCTCAACC	4.65001	PLASM1
CTAGAGTCAACTGCGC	4.25545	LAM3
CTAGAGTCAAGACACG	2.56827	PLASM1
CTAGAGTCAGGACCCT	2.52201	PLASM1
CTAGAGTGTCTGCAAT	4.52979	LAM3
CTAGAGTTCTGATTCT	2.76682	LAM3
CTAGCCTAGCGATGAC	4.35761	LAM1
CTAGTGAAGGGAGTAA	3.324	LAM2
CTAGTGAAGTGGGTTG	-9.60108e-06	PLASM1
CTAGTGAGTATTAGCC	2.42459	PLASM1
CTAGTGAGTCAGAATA	2.22751	PLASM1
CTAGTGATCCCAACGG	4.61209	LAM3
CTCACACTCTCAACTT	3.67343	LAM2
CTCAGAACAAATTGCC	4.45176	LAM2
CTCAGAACACTTGGAT	1.71038	LAM3
CTCAGAAGTCCAAGTT	-3.94872e-06	LAM1
CTCAGAATCGTACGGC	5.9554	LAM3
CTCATTAAGACGCAAC	1.09624e-05	LAM3
CTCATTAAGGCAATTA	3.50384	LAM2
CTCATTAAGGCAGTCA	-2.65484e-06	PLASM1
CTCATTACAAAGTCAA	2.46908	PLASM1
CTCCTAGCACCGGAAA	-1.47831e-05	PLASM1
CTCCTAGGTGTGCGTC	3.74457	LAM3
CTCCTAGGTTCACCTC	3.59202	LAM3
CTCCTAGGTTCACGGC	1.99953e-06	PLASM1
CTCCTAGGTTGAACTC	-5.33306e-06	PLASM1
CTCGAAAAGAAGAAGC	-2.66032e-06	PLASM1
CTCGAAAAGATGCCAG	2.02359	LAM2
CTCGAAAAGCGATTCT	-1.80745e-06	PLASM1
CTCGAAACAGCTTAAC	3.37504	LAM2
CTCGAAATCGTGGTCG	3.69542e-06	LAM1
CTCGAGGAGTAGCCGA	4.07034e-06	PLASM1
CTCGAGGCACTTGGAT	1.98979	PLASM1
CTCGAGGCATATGAGA	3.86418	LAM2
CTCGAGGTCTGCGACG	5.40864	LAM2
CTCGGAGAGAACAACT	2.78363	LAM2
CTCGGAGCACGCGAAA	-9.63422e-06	PLASM1
CTCGGAGCAGGACGTA	2.35099	PLASM1
CTCGGAGGTGACAAAT	3.84309	LAM2
CTCGGAGTCACCAGGC	4.91116	LAM3
CTCGGGAAGAGGGCTT	-1.09909e-05	LAM1
CTCGGGAAGCGTTCCG	4.9622	LAM3
CTCGGGAAGGAGTTTA	2.33774	LAM2
CTCGGGAAGGATCGCA	1.97326	LAM2
CTCGGGACACAAGACG	4.78342	LAM2
CTCGGGACACTCAGGC	2.4042e-06	PLASM1
CTCGGGATCATGTAGC	2.11752	LAM2
CTCGTACGTACCTACA	4.87968e-06	LAM2
CTCGTACTCTACTTAC	2.84746	PLASM1
CTCGTCAAGATGTGGC	3.33145	LAM3
CTCGTCAAGCGAGAAA	4.64609	LAM2
CTCGTCAAGCTGCAAG	1.97167	LAM3
CTCGTCAGTTAAGGGC	3.26198	LAM2
CTCGTCATCGCTAGCG	2.12853	PLASM1
CTCTAATCATGGAATA	6.00456	LAM3
CTCTAATTCACCACCT	-9.08803e-06	PLASM1
CTCTAATTCGAATGCT	2.40893e-05	PLASM1
CTCTAATTCGCATGGC	4.76175	LAM3
CTCTACGAGCTTTGGT	5.41526	LAM3
CTCTACGCAACTGCGC	5.12604	LAM2
CTCTACGCATGCCTAA	3.54855	LAM2
CTCTACGGTGTGCCTG	4.22068	LAM1
CTCTACGGTTCGCTAA	1.24035e-06	PLASM1
CTCTACGTCGACCAGC	5.39406	LAM2
CTCTGGTAGGAATGGA	4.23036	LAM3
CTCTGGTAGGCATGGT	4.99746	LAM3
CTCTGGTCACCAGGCT	4.46035	LAM2
CTCTGGTCACGAGGTA	3.13158	LAM1
CTCTGGTCACGTTGGC	3.15126	LAM1
CTCTGGTCACTCAGGC	3.29205	LAM2
CTCTGGTGTGTGGTTT	-1.05684e-05	PLASM1
CTCTGGTTCAACCATG	3.866	PLASM1
CTCTGGTTCACATAGC	5.40344	PLASM1
CTCTGGTTCACTGGGC	3.0427	LAM2
CTCTGGTTCCTCCTAG	3.97125	LAM2
CTCTGGTTCTTGAGAC	2.50546	LAM1
CTGAAACAGTACGTAA	4.35226	LAM2
CTGAAACTCCAGGGCT	-3.04923e-06	PLASM1
CTGAAACTCCCTGACT	3.4516	LAM2
CTGAAGTAGACTTTCG	3.09113	LAM1
CTGAAGTAGCTAACAA	5.27347	LAM2
CTGAAGTAGGGAACGG	-6.63218e-06	LAM2
CTGAAGTAGTCCTCCT	2.61671	LAM2
CTGAAGTAGTCGATAA	5.8809	LAM2
CTGAAGTCAAGTCTAC	3.50124	LAM2
CTGAAGTCAGCGTAAG	3.42708	LAM3
CTGAAGTGTCTAGAGG	1.06523e-05	PLASM1
CTGAAGTGTTGAGGTG	4.50192	LAM3
CTGAAGTTCCACGTGG	4.82181	LAM3
CTGAAGTTCGCAAGCC	4.77492	LAM1
CTGAAGTTCTCTTATG	2.20929	LAM2
CTGATAGAGAGTACAT	4.79111	LAM1
CTGATAGTCATGCAAC	2.85617	PLASM1
CTGATAGTCTTCGAGA	5.27606	LAM1
CTGATCCAGGGTGTTG	4.04083	LAM2
CTGATCCAGGTAGCTG	5.5563	LAM2
CTGATCCTCACGAAGG	4.07091	LAM2
CTGATCCTCCACGTTC	3.53522	LAM2
CTGATCCTCCAGTAGT	4.65874	PLASM1
CTGCCTAAGAAACGCC	4.06356	LAM2
CTGCCTAAGATAGTCA	1.25578e-05	PLASM1
CTGCCTAGTAGGCATG	-9.6463e-06	PLASM1
CTGCCTAGTTACTGAC	3.6594	LAM2
CTGCCTATCTTCTGGC	4.70233	LAM2
CTGCGGAAGCACAGGT	8.81023e-06	PLASM1
CTGCGGAAGCCAGGAT	1.00254e-05	PLASM1
CTGCGGAAGTCTCGGC	2.12666	PLASM1
CTGCGGAGTCATATGC	2.94029	PLASM1
CTGCGGATCATTGCCC	2.43386	PLASM1
CTGCGGATCGCCGTGA	1.58593	LAM2
CTGCTGTAGGCGCTCT	3.04697	LAM2
CTGCTGTAGTGGGATC	4.58172	LAM2
CTGCTGTCAGGGATTG	2.51693	LAM1
CTGCTGTGTCTCCCTA	5.27511	LAM2
CTGCTGTGTCTGCAAT	1.82611	PLASM1
CTGCTGTTCCAAGCCG	2.13834	LAM2
CTGCTGTTCCCTGACT	5.10949	LAM3
CTGGTCTGTAACGTTC	1.71506	LAM2
CTGGTCTGTATGCTTG	3.35826	PLASM1
CTGGTCTTCACATAGC	3.82686	LAM2
CTGGTCTTCACTTATC	1.02289e-05	PLASM1
CTGGTCTTCCAATGGT	4.57723	LAM2
CTGTGCTAGTACTTGC	4.716	LAM2
CTGTGCTCACCGCTAG	2.64722	LAM2
CTGTGCTCACTTAAGC	2.00761	LAM2
CTGTGCTCATCCGGGT	2.23591	LAM2
CTGTGCTTCAGCATGT	2.31182	LAM2
CTGTGCTTCGCCATAA	2.98376e-06	LAM1
CTGTTTAAGACAAGCC	4.44132	LAM2
CTGTTTAAGCCTTGAT	4.58022	LAM2
CTGTTTACAATCTACG	1.41535	PLASM1
CTGTTTACACTAAGTC	-1.4093e-05	PLASM1
CTGTTTATCAGAAATG	1.24904	PLASM1
CTGTTTATCAGGCCCA	3.83508	LAM2
CTTAACTCAATCGAAA	5.91032	LAM2
CTTAACTCAGGCGATA	5.92225	LAM2
CTTAACTCATGTTGAC	2.30591	PLASM1
CTTAACTGTAGCACGA	-2.43809e-06	PLASM1
CTTAACTGTCAACATC	6.21809e-06	PLASM1
CTTAACTGTCTCCATC	-3.44595e-06	PLASM1
CTTAACTTCCCAAGTA	-2.35522e-05	LAM1
CTTAACTTCCGTTGTC	2.52882	LAM2
CTTAACTTCTGTGCAA	4.13471	LAM3
CTTACCGAGAAACCTA	4.48831	LAM2
CTTACCGAGACGCAAC	3.7972e-08	LAM2
CTTACCGCACCCAGTG	1.34255e-05	PLASM1
CTTACCGTCTAACGGT	2.771	LAM2
CTTAGGAAGTTGAGAT	2.43957	LAM2
CTTAGGACACCACCAG	6.29064e-06	LAM2
CTTAGGATCAATCTCT	1.01598e-06	LAM2
CTTAGGATCAGCTGGC	6.71121e-06	PLASM1
CTTCTCTAGAATAGGG	3.88056	LAM2
CTTCTCTCAAGCCGTC	3.53241	LAM2
CTTCTCTGTAAGCACG	4.91838	LAM2
CTTCTCTGTGTCAATC	5.5397	LAM2
CTTCTCTGTGTTGAGG	4.92381	LAM2
CTTGGCTAGATGGCGT	4.87536	LAM2
CTTGGCTAGGTAAACT	4.25513	LAM3
CTTGGCTCACACCGCA	4.78716	LAM3
CTTGGCTCACATTAGC	4.43194	LAM3
CTTGGCTCACCGTTGG	3.11581	LAM1
CTTGGCTCATGTAGTC	2.92659	LAM2
CTTGGCTGTAAATGTG	7.80452e-06	PLASM1
CTTGGCTGTTAGATGA	2.3913	PLASM1
CTTGGCTGTTCTGGTA	4.82692	LAM3
CTTGGCTTCTTTAGTC	4.34085	LAM2
CTTTGCGAGAGTCTGG	-1.687e-05	PLASM1
CTTTGCGCACGACGAA	4.41118	LAM2
CTTTGCGCAGGTTTCA	4.36647	LAM3
CTTTGCGCATCGACGC	2.08923	PLASM1
CTTTGCGGTGCGATAG	5.28215	LAM3
CTTTGCGGTGGTACAG	4.72627	LAM2
CTTTGCGTCCAAGTAC	4.89441	LAM3
CTTTGCGTCTTCATGT	2.51301	PLASM1
GAAACTCCAAATTGCC	5.38791	LAM2
GAAACTCCAGGATCGA	1.40914e-05	PLASM1
GAAACTCCATAACCTG	4.63019	LAM2
GAAACTCCATACAGCT	2.1443	PLASM1
GAAACTCCATTTGCCC	4.74402	LAM2
GAAACTCGTGTTGAGG	1.47949e-05	PLASM1
GAAATGAAGTCTCAAC	3.63761	LAM3
GAAATGAAGTCTTGCA	3.34448	LAM2
GAAATGAAGTTTGCGT	2.73919	LAM3
GAAATGACATCCGCGA	4.47712	LAM2
GAAATGAGTTCCGGCA	5.1669	LAM2
GAAATGATCATCACCC	4.34352	LAM2
GAAATGATCGACAGCC	3.03256	LAM1
GAACATCAGAAGGACA	3.9706	LAM2
GAACATCAGATGTGGC	4.71578	LAM3
GAACATCCACGAAACG	9.23493e-06	PLASM1
GAACATCCACGGTGTC	2.27025	PLASM1
GAACATCCAGCATGAG	3.05716	PLASM1
GAACATCCATGCCTTC	1.95365	PLASM1
GAACATCGTCCTAGCG	-1.35211e-05	PLASM1
GAACATCGTCGGGTCT	5.30834	LAM1
GAACATCTCACTCCTG	1.60965e-05	PLASM1
GAACATCTCACTTATC	3.65212	LAM2
GAACCTAAGATGTTAG	5.16786	LAM2
GAACCTAAGTCTTGCA	-1.07251e-05	PLASM1
GAACCTAAGTGCCATT	4.89412	LAM2
GAACCTACAAGCGCTC	6.65647e-06	PLASM1
GAACCTAGTCATCGGC	3.89867	LAM2
GAACCTAGTGTGTGCC	4.80568	LAM3
GAACCTATCGGATGGA	2.00109	LAM1
GAACCTATCTTTACAC	2.35814	LAM1
GAACGGAAGTGGGATC	-1.7271e-06	PLASM1
GAACGGACAAGCGATG	6.8205e-06	PLASM1
GAACGGACATCACGAT	3.7148	LAM3
GAACGGAGTATGAAAC	3.76915	LAM3
GAACGGAGTCCGTGAC	-1.37765e-05	PLASM1
GAACGGAGTCCTCTTG	2.4649	LAM1
GAACGGATCCCTCAGT	2.60743	LAM1
GAACGGATCCTGTAGA	2.93167e-07	PLASM1
GAACGGATCGTTTGCC	5.29969	LAM3
GAAGCAGAGCTACCGC	5.6758	LAM2
GAAGCAGGTGTGCGTC	3.27023	PLASM1
GAAGCAGTCACCATAG	3.5924	LAM2
GAAGCAGTCCAGAGGA	1.78496e-05	PLASM1
GAAGCAGTCCGTCAAA	3.90393	LAM2
GAAGCAGTCCTCGCAT	-5.69088e-06	PLASM1
GAAGCAGTCTTGAGGT	5.00826	LAM2
GAATAAGAGCAGATCG	6.61782	LAM2
GAATAAGAGGGATCTG	5.01998	LAM2
GAATAAGCAAACGTGG	3.71015	LAM3
GAATAAGCATATACCG	4.64798	LAM1
GAATAAGCATTCCTGC	3.37913	LAM1
GAATAAGGTAGCTTGT	5.12253	LAM2
GAATAAGGTATGCTTG	4.43042	LAM2
GAATAAGTCTTCTGGC	4.3341	LAM2
GAATGAAAGAGGACGG	5.1566	LAM2
GAATGAAAGCGATTCT	4.56663	LAM2
GAATGAAAGGTGTTAA	2.61403	LAM2
GAATGAACAAAGCGGT	1.41444	PLASM1
GAATGAAGTGAGCGAT	1.9698	LAM1
GAATGAATCCATGCTC	2.99037	LAM2
GAATGAATCGAGAGCA	-5.69498e-06	PLASM1
GACACGCAGAGTCTGG	1.92205e-06	PLASM1
GACACGCGTCTTGATG	5.12984	LAM2
GACACGCGTGATAAAC	4.80875	LAM2
GACACGCGTTGCGCAC	2.62918	PLASM1
GACACGCTCCCTCTTT	-1.37502e-06	PLASM1
GACAGAGAGCGCCTTG	1.50208	PLASM1
GACAGAGGTCCGACGT	2.378	LAM1
GACAGAGTCACTCTTA	2.06373	PLASM1
GACAGAGTCTGGCGAC	3.93026	LAM2
GACCAATAGACTACAA	6.38887e-06	LAM2
GACCAATAGCCACGCT	3.33224	PLASM1
GACCAATAGCGTGAGT	3.61338	LAM2
GACCAATAGGATGGTC	3.11157	LAM1
GACCAATCAGATGGCA	2.78944	LAM2
GACCAATCAGCGTAAG	6.44149e-06	PLASM1
GACCAATGTCAATGTC	1.63767e-05	PLASM1
GACCAATGTGCACGAA	1.22665e-05	PLASM1
GACCAATTCACCGGGT	1.47788	PLASM1
GACCTGGGTAGAAGGA	3.96333	LAM2
GACGCGTAGTGACTCT	5.27208	LAM3
GACGCGTCAAGAGGCT	1.54285e-05	PLASM1
GACGCGTCACAACGTT	2.20603	LAM1
GACGCGTCAGTATGCT	1.70069e-05	LAM1
GACGCGTCATTTGCCC	1.98562	PLASM1
GACGCGTTCGCAGGCT	-8.179e-06	PLASM1
GACGCGTTCTTTACAC	4.36728	LAM3
GACGGCTCAGGGTATG	3.72791	LAM2
GACGGCTGTCTTCGTC	1.66625	LAM3
GACGGCTGTGATGTCT	3.09994	LAM2
GACGGCTGTTCGAATC	2.53796	LAM2
GACGGCTTCTGGGCCA	3.34305	LAM3
GACGGCTTCTGGTTCC	1.67882	LAM1
GACGTGCAGAATTCCC	2.77856	LAM2
GACGTGCCACAGTCGC	3.60318	LAM2
GACGTGCCACATCTTT	5.72332	LAM2
GACGTGCCATCCGTGG	4.22345	LAM1
GACGTGCTCGATGAGG	3.13683	LAM1
GACGTGCTCGCTTAGA	6.16083	LAM3
GACGTGCTCTCGATGA	4.34732	LAM2
GACGTTACAAAGTGCG	2.65876	PLASM1
GACGTTACACCAACCG	3.0036	LAM2
GACTAACAGACTACAA	5.71123e-06	PLASM1
GACTAACAGTGCCAGA	3.71966	LAM2
GACTAACCAACTTGAC	2.8187	LAM3
GACTAACCAATGGAAT	3.29908	LAM2
GACTAACGTTGCTCCT	2.9546	LAM2
GACTAACTCCTGTACC	5.31434	LAM2
GACTACAAGGAGTCTG	5.02505	LAM1
GACTACACACATGACT	4.31331	LAM3
GACTACAGTAGCGCAA	2.70292	LAM2
GACTACATCAAGCCTA	1.26149	PLASM1
GACTACATCGCTTGTC	2.20642	PLASM1
GACTACATCTTAGCCC	-1.2224e-06	PLASM1
GACTGCGAGCCGTCGT	1.33853e-05	PLASM1
GACTGCGGTCCAACTA	3.20709	LAM2
GACTGCGGTTCCGTCT	1.41484e-05	PLASM1
GACTGCGTCAACCATG	5.43475	LAM3
GACTGCGTCACGACTA	4.21316	LAM1
GACTGCGTCTAGAGTC	2.18541	LAM1
GAGCAGAAGCCTATGT	6.58377	LAM2
GAGCAGACACATCCAA	4.63283	LAM2
GAGCAGAGTGTGAATA	2.2729	PLASM1
GAGCAGATCCCTTGCA	4.17938	LAM1
GAGGTGAAGACAATAC	3.02577	LAM2
GAGGTGACAATAGCGG	3.79835	LAM3
GAGGTGACACAGATTC	4.72908	LAM3
GAGGTGACACCAGATT	8.26094e-06	PLASM1
GAGGTGAGTTCAGCGC	3.23917e-06	PLASM1
GAGGTGAGTTGGTTTG	5.13313	LAM2
GAGGTGATCACTTCAT	1.20262e-05	LAM1
GAGGTGATCCGATATG	3.03896	LAM2
GAGGTGATCGTATCAG	4.00298	LAM3
GAGTCCGAGAGTGACC	3.6459e-06	LAM2
GAGTCCGCAGGATTGG	2.76565	LAM2
GAGTCCGGTGAGTATA	3.82461	LAM2
GAGTCCGGTGCTGTAT	3.74345	LAM2
GAGTCCGTCGCCAAAT	4.87497	LAM2
GATCAGTAGCTGAAAT	-8.58557e-07	PLASM1
GATCAGTCAGACGCTC	3.94571	LAM2
GATCAGTCAGTACACT	4.69584	LAM2
GATCAGTGTCATTAGC	5.11146	LAM3
GATCAGTTCGAACTGT	4.25738	PLASM1
GATCAGTTCGAATGCT	2.79753	LAM3
GATCAGTTCGTACGGC	1.07987e-05	PLASM1
GATCAGTTCTACGAGT	-3.53594e-06	PLASM1
GATCGATAGAATAGGG	2.10226	PLASM1
GATCGATCACGAAGCA	3.39578	LAM2
GATCGATCACGGATAG	-8.21708e-06	PLASM1
GATCGATCATCAGTAC	4.89531e-06	PLASM1
GATCGATCATTAGGCT	3.29016	LAM2
GATCGATGTCAATACC	1.30146	PLASM1
GATCGATGTTCTGAAC	4.9462	LAM2
GATCGATTCTTCGAGA	5.50865	LAM1
GATCGCGAGAGGTTAT	-3.98646e-06	PLASM1
GATCGCGAGCCACTAT	4.73818	LAM2
GATCGCGGTCAAAGCG	5.4851	LAM3
GATCGCGGTTGCGCAC	1.88205	LAM2
GATCGTAAGTCCCACG	5.05113	LAM2
GATCGTACACCCATTC	3.84746	LAM2
GATCGTAGTAACGCGA	5.34225	LAM2
GATCGTAGTCAACATC	3.19097	LAM2
GATCGTAGTCGGCACT	4.59343	LAM2
GATCTAGAGTGTCTCA	4.50967	LAM3
GATCTAGCAATAAGCA	2.98296	LAM2
GATCTAGCACGGCTAC	3.97973	LAM1
GATCTAGCATCGATTG	4.91197	LAM1
GATCTAGCATGTCTCC	4.80283	LAM3
GATCTAGTCCGAAGAG	2.72044	LAM3
GATGAAAAGATATGGT	4.77209	LAM3
GATGAAAAGTTCCACA	3.69477	LAM2
GATGAAAAGTTGTCGT	2.78798	LAM1
GATGAAAGTTACGCGC	4.91186	LAM3
GATGAAATCCAAAGTC	3.46556	LAM3
GATGAGGAGATCGGGT	1.6652	PLASM1
GATGAGGAGCCCAATT	4.24573	LAM2
GATGAGGAGCTAGTTC	3.72845	LAM2
GATGAGGCAAAGTCAA	-1.48159e-05	PLASM1
GATGAGGCATACAGCT	5.94171e-06	LAM1
GATGAGGGTGATGCCC	2.72466	LAM1
GATGAGGGTTACCAGT	3.66504	LAM3
GATGAGGTCGGAATCT	5.29339	LAM2
GATGAGGTCTTATCTG	3.07495	LAM2
GATGCTAAGCAAATCA	4.30079	LAM2
GATGCTAAGGAGTTTA	3.49348	LAM2
GATGCTAAGGGTGTGT	3.92284e-06	PLASM1
GATGCTACACGAGAGT	2.22167	PLASM1
GATGCTAGTATATGGA	5.11808	LAM2
GATGCTAGTTCGTCTC	3.00848	LAM3
GATGCTATCCGCGGTA	1.10497e-07	LAM1
GATGCTATCTACTTAC	4.16355	LAM2
GATGCTATCTTCATGT	-8.88879e-06	PLASM1
GATTCAGAGACTGTAA	3.43041	LAM2
GATTCAGAGCAGATCG	-6.56117e-06	PLASM1
GATTCAGCAGGAATCG	-1.08852e-05	LAM1
GATTCAGGTAGCGTGA	3.23862	PLASM1
GATTCAGGTATGGTTC	3.693	LAM1
GATTCAGGTCGACTAT	3.05857	LAM2
GCAAACTAGACACGAC	1.33381	PLASM1
GCAAACTAGGCAGTCA	2.32656	PLASM1
GCAAACTAGGGCACTA	2.86814	LAM2
GCAAACTAGTGCGTGA	4.5222	LAM2
GCAAACTCATCGGTTA	-8.30972e-06	PLASM1
GCAAACTGTAGGACAC	4.52294	LAM2
GCAAACTGTAGTGAAT	4.69778	LAM2
GCAAACTGTGAGGGTT	-5.01667e-06	LAM2
GCAAACTGTGTCAATC	4.9304	LAM2
GCAAACTGTGTGCCTG	-4.30651e-06	PLASM1
GCAAACTTCATACGGT	3.04467	PLASM1
GCAATCAAGTTGAGTA	3.83256	LAM3
GCAATCACACAAGCCC	5.63587	LAM2
GCAATCACAGCCTTTC	-3.41907e-06	PLASM1
GCAATCACATCCGCGA	5.28924	LAM2
GCAATCACATTGGCGC	4.58506	LAM2
GCAATCATCGCCGTGA	3.60267	LAM2
GCAATCATCTGCAAGT	2.64181	PLASM1
GCACATAAGACGCACA	4.07112	LAM2
GCACATAAGACTAAGT	3.34329	PLASM1
GCACATAAGGTCGGAT	4.61768	LAM2
GCACATAGTATCACCA	4.08568	LAM3
GCACATAGTTCACGGC	5.13871e-07	PLASM1
GCACATATCCTCTAGC	2.23801	PLASM1
GCACATATCTGGTATG	3.43315	LAM3
GCACTCTAGAAGATTC	-5.46533e-06	PLASM1
GCACTCTAGCGTCTAT	3.38198	LAM3
GCACTCTAGTGTACTC	-1.211e-05	PLASM1
GCACTCTCAGGTTTCA	6.6199	LAM2
GCACTCTCATCACAAC	2.95377	LAM3
GCACTCTCATGAACCT	5.3486	LAM3
GCACTCTGTCCGACGT	3.82718	LAM3
GCACTCTGTCTGCAAT	4.99408	LAM2
GCACTCTTCATGTAGC	2.0444	LAM2
GCACTCTTCTACGAGT	4.5841	LAM3
GCAGCCAAGTGACTCT	3.50929	LAM2
GCAGTTACAAACTGTC	3.17988	LAM3
GCAGTTACAGGACCCT	4.44591	LAM3
GCAGTTAGTAGGGTAC	4.55721	LAM2
GCAGTTAGTGTATGGG	3.37756	PLASM1
GCAGTTAGTTTCGCTC	4.41239	LAM2
GCAGTTATCGATGAGG	2.54314	LAM2
GCAGTTATCTTGACGA	3.46205	LAM2
GCATACAAGTATCTCG	4.24436	LAM1
GCATACAGTCTTCTCG	-1.49333e-06	PLASM1
GCATGATAGGGAAACA	4.48334	LAM2
GCATGATAGTTGTAGA	1.92287	PLASM1
GCATGATCAGTAACGG	3.89837	LAM3
GCATGATGTTAGATGA	2.52712	PLASM1
GCATGATTCAGATAAG	4.41684	LAM2
GCATGATTCCCATTAT	5.02342e-06	PLASM1
GCATGCGAGCTGCCCA	5.56885	LAM2
GCATGCGAGTGAAGAG	4.50989	LAM2
GCATGCGCAAAGCAAT	3.57616	LAM2
GCATGCGCAAGCTGAG	1.41824e-05	PLASM1
GCATGCGCACGTGAGA	4.3917e-06	LAM2
GCATGCGGTACGCTGC	4.74773	LAM2
GCATGCGGTCGCGAAA	2.26806	PLASM1
GCATGCGGTGCGAAAC	2.5334	PLASM1
GCATGTAGTGGTACAG	5.03257	LAM3
GCATGTAGTTATTCTC	2.93776	LAM1
GCATGTATCAACGGGA	2.24139	PLASM1
GCATGTATCATGCAAC	4.13278	LAM3
GCCAAATAGCGAGAAA	1.90904	PLASM1
GCCAAATCAGACAGGT	4.84734	LAM2
GCCAAATGTCATCCCT	2.56001	PLASM1
GCCAAATTCACGATGT	3.70766	LAM2
GCCAAATTCTTGCAAG	3.9626	LAM2
GCCTCTATCACGCATA	2.42921	PLASM1
GCCTCTATCCGTAGTA	2.6437	PLASM1
GCCTCTATCGGTGTCG	3.82371	LAM3
GCCTCTATCTAACCGA	3.06448	LAM2
GCGACCAAGAAACCAT	4.66392	LAM3
GCGACCAAGCGGCTTC	4.18939	LAM2
GCGACCACACTTAAGC	2.52002	LAM2
GCGACCAGTAGGACAC	2.12216	PLASM1
GCGACCATCAAACAAG	3.92043	LAM2
GCGACCATCGGATGTT	2.74969	LAM2
GCGAGAAAGAGGTTGC	-5.60696e-06	PLASM1
GCGAGAAAGCTATGCT	4.38309	LAM1
GCGAGAAAGGTAGCCA	2.67421	LAM3
GCGAGAAAGGTTCCTA	3.8063	LAM3
GCGAGAACAATCCGAT	9.39026e-06	PLASM1
GCGAGAACAGCTGCTG	3.87576	LAM2
GCGAGAACATGTAAGA	2.46996	LAM2
GCGAGAAGTGTTCGAT	1.44686e-05	PLASM1
GCGCAACAGATCCGAG	-3.32628e-06	LAM1
GCGCAACAGCTTTGGT	3.90037	LAM2
GCGCAACAGTATCTCG	3.39124	PLASM1
GCGCAACAGTGTCCAT	3.18801	LAM2
GCGCAACCAAGCTGAG	2.0787	PLASM1
GCGCAACCAATAGAGT	3.34607	LAM3
GCGCAACCAATGGAAT	4.41837	LAM2
GCGCAACGTACACCGC	3.85233	LAM2
GCGCAACGTCCGTCAG	4.37203	LAM2
GCGCAACGTCTCATCC	1.88714	PLASM1
GCGCAACGTTTGCATG	1.99911e-05	PLASM1
GCGCAACTCGACAGCC	1.39278e-06	PLASM1
GCGCAGTAGAAACGAG	4.68007	LAM2
GCGCAGTAGAACAACT	3.77087	LAM2
GCGCAGTAGGCTAGCA	4.28855e-06	LAM2
GCGCAGTAGTCCAGGA	3.55458	LAM3
GCGCAGTGTGTATGGG	2.97927	LAM2
GCGCAGTTCGGAAACG	4.11957	LAM3
GCGCCAAAGAAGGCCT	4.18349	LAM2
GCGCCAATCTCTTGAT	2.46863	PLASM1
GCGCGATAGAGACGAA	2.29014	PLASM1
GCGCGATAGATCCCAT	8.71359e-06	LAM2
GCGCGATCACGAGAGT	1.19894e-06	PLASM1
GCGCGATCACTTAACG	7.73904	LAM3
GCGCGATGTCGGATCC	1.90556	LAM2
GCGCGATTCTTGTATC	2.50742	PLASM1
GCGGGTTCACTTCTGC	-4.61534e-06	LAM1
GCGGGTTCAGGTGCCT	1.98658	LAM2
GCGGGTTGTGAAGGCT	1.57523	PLASM1
GCGGGTTGTGGTTTCA	3.84938	LAM1
GCGGGTTTCGCGTAGC	4.99761	LAM3
GCGGGTTTCTGGCGTG	2.95759	LAM3
GCTCCTAAGAGGTTAT	5.5205	LAM2
GCTCCTAAGGTGTGGT	2.34483	LAM2
GCTCCTACAAAGTCAA	2.51133	LAM1
GCTCCTACAAGAAAGG	7.62613e-06	PLASM1
GCTCCTACACGACGAA	2.51526	PLASM1
GCTCCTACATAGACTC	3.43348	LAM1
GCTCCTAGTAAGTGTA	1.80438e-05	LAM2
GCTCCTATCACAATGC	4.94457	LAM2
GCTCTGTAGAACTGTA	4.47268	LAM2
GCTCTGTCACTAAGTC	2.80674	LAM2
GCTCTGTGTAAGGGAA	3.73074	LAM2
GCTCTGTTCACCTTAT	4.6939	LAM2
GCTCTGTTCCTGTACC	5.26121	LAM2
GCTCTGTTCTAACCGA	3.31103	LAM1
GCTCTGTTCTCGGACG	1.94327	LAM2
GCTGCAGCATTACCTT	5.81464	LAM2
GCTGCAGGTTATTCTC	-8.78362e-06	PLASM1
GCTGCAGTCATGTGGT	2.22458	PLASM1
GCTGCGACACATAACC	4.26436	LAM2
GCTGCGACACGGCTAC	-1.35772e-05	PLASM1
GCTGCGACATTGCGGC	1.1427e-05	PLASM1
GCTGCGAGTCTCATCC	4.12575	LAM2
GCTGCGAGTTGTGGCC	4.17082	LAM2
GCTGCGATCCAAACAC	4.17939	LAM2
GCTGCGATCCTTTACA	3.11755	LAM2
GCTGCTTAGTGGTAGC	5.29069	LAM1
GCTGCTTCAATGGAAT	5.32205	LAM3
GCTGCTTGTCCTCCAT	4.44846	LAM1
GCTGGGTAGGACTGGT	2.97343	PLASM1
GCTGGGTCAGACAGGT	4.59464	LAM2
GCTGGGTCATCTATGG	2.13833	PLASM1
GCTGGGTGTCTTCAAG	5.27031	LAM3
GCTGGGTGTTCTGAAC	5.32306	LAM2
GCTGGGTTCACGCGGT	3.37261	LAM3
GCTTCCAAGCTGGAAC	5.00658	LAM2
GCTTCCACACAGACAG	-9.71862e-06	LAM3
GCTTCCACATGTCTCC	1.83273	LAM1
GCTTCCAGTGGACGAT	-6.90245e-06	PLASM1
GCTTCCAGTGTGTGCC	4.32767	LAM2
GCTTCCAGTTACCAGT	1.37766e-06	PLASM1
GCTTCCAGTTGGGACA	3.98322	LAM2
GCTTGAAAGTAGCGGT	5.61336	LAM2
GCTTGAACAACCGCCA	2.02347	PLASM1
GCTTGAAGTCTTCTCG	4.03069	LAM2
GGAAAGCCACCGAAAG	3.06648	LAM1
GGAAAGCGTTTGGGCC	5.56645	LAM1
GGAAAGCTCATAAAGG	3.30179	LAM2
GGAAAGCTCTCAAGTG	-8.84502e-06	PLASM1
GGAACTTAGCGTGAAC	5.8824	LAM3
GGAACTTCACGAAGCA	4.03159	LAM2
GGAACTTGTTACGTCA	2.60622	LAM2
GGAACTTTCTTGAGGT	3.43917	LAM2
GGAATAAAGGGTGTGT	-9.48992e-06	LAM2
GGAATAACAAACCCAT	2.89675	LAM2
GGAATAACAAACGTGG	5.62568	LAM2
GGAATAACAATAAGCA	-1.78873e-05	LAM1
GGAATAACATCCCACT	4.75893	LAM2
GGAATAAGTAAGTTCC	-1.9497e-05	PLASM1
GGAATAAGTTATCACG	-4.15234e-06	LAM2
GGAATAAGTTGAGGTG	6.87872	LAM2
GGAATAATCCTAGGGC	-7.02e-06	PLASM1
GGACAAGAGAATAGGG	-1.40384e-05	PLASM1
GGACAAGAGAGCTTCT	-3.98824e-06	PLASM1
GGACAAGAGATCCCAT	2.42714	PLASM1
GGACAAGGTCCGTTAA	-9.24078e-06	LAM1
GGACAAGGTGAAGGCT	4.19883	LAM2
GGACAAGTCAAACCGT	4.82879	LAM2
GGACAAGTCATGCAAC	4.01839	LAM2
GGACAGACAAGACACG	-4.52627e-06	LAM1
GGACAGACAAGCTGAG	4.61718	LAM2
GGACAGACATCGGAAG	-1.28568e-05	PLASM1
GGACATTAGATAGTCA	4.51011	LAM3
GGACATTAGATCTGAA	3.68719	LAM2
GGACATTAGATGTGGC	5.98915	LAM2
GGACATTCACATGACT	5.08192	LAM2
GGACATTGTAGCTCCG	4.77879	LAM2
GGACATTTCCGCGGTA	3.94787	LAM3
GGACATTTCGAACGGA	5.93728	LAM1
GGACATTTCGCAAGCC	3.57929	LAM3
GGACATTTCTGGTATG	3.24845	LAM2
GGACGTCAGCAACGGT	3.78403	LAM2
GGACGTCCACGTTGGC	4.39576	LAM2
GGACGTCGTTACAGAA	3.99634e-06	PLASM1
GGACGTCGTTCGGCAC	-6.46913e-06	PLASM1
GGACGTCTCATGGTCA	2.7209	LAM2
GGAGCAAGTTCCGGCA	2.2622	LAM1
GGAGCAATCAACACCA	4.24369	LAM2
GGAGCAATCCGTACAA	1.68916	LAM1
GGAGCAATCTCTGCTG	2.83809	LAM1
GGAGCAATCTGGCGAC	2.71003	PLASM1
GGATGTTCATCCGCGA	4.16298e-06	PLASM1
GGATGTTGTTATCGGT	2.3132	PLASM1
GGATTACCAGCCAGAA	2.53568	PLASM1
GGATTACCAGGGTACA	3.61736	LAM1
GGATTACGTCTTCGTC	2.95334	LAM2
GGATTACTCGAACGGA	5.96384	LAM1
GGCAATTAGAGGTTGC	3.9091	LAM2
GGCAATTAGCTTATCG	3.63219	LAM2
GGCAATTAGTACATGA	2.55534	LAM2
GGCAATTCAAGAAGAG	2.27903	LAM1
GGCAATTCAAGCGAGT	1.23493	PLASM1
GGCAATTCATAGTAAG	1.9378	PLASM1
GGCAATTCATTCCTCG	1.41451e-05	LAM2
GGCAATTTCTGCGTAA	6.18338e-06	PLASM1
GGCCGATAGTCTCCTC	5.66788	LAM2
GGCCGATCAACTGCGC	5.08168	LAM2
GGCCGATCAATAAGCA	4.91675	LAM2
GGCCGATCACGTCAGC	2.39527	LAM2
GGCCGATGTAGCGCAA	4.79321	LAM1
GGCCGATGTATAGGTA	2.38256	PLASM1
GGCCGATGTCCCTACT	8.62628e-06	PLASM1
GGCCGATGTCGCATCG	-5.76935e-06	PLASM1
GGCCGATGTCTCAACA	-1.32267e-06	PLASM1
GGCCGATGTTCCATGA	3.89267	LAM2
GGCGACTGTTAGGGTG	5.01441	LAM3
GGCGACTTCTGGTTCC	3.32478	LAM2
GGCGACTTCTGTCTAT	2.05781	PLASM1
GGCGTGTCACTTCTGC	2.5745	LAM2
GGCGTGTTCACTGGGC	4.68363	LAM3
GGCGTGTTCCGCAGTG	2.96184	LAM2
[truncated: 13,086 more rows]

## Sheet: Panel E - differential express
Genes	p_val	avg_log(e)FC	pct.1	pct.2	p_val_adj	gene
FBgn0013733	0	3.22987	0.999	0.911	0	shot
FBgn0038682	0	3.06985	0.996	0.887	0	CG5835
FBgn0003888	0	3.05643	1	0.986	0	betaTub60D
FBgn0030396	0	2.98626	0.996	0.851	0	CG2556
FBgn0010424	0	2.96873	0.98	0.695	0	TpnC73F
FBgn0015872	0	2.92408	0.994	0.868	0	Drip
FBgn0032897	0	2.89721	0.986	0.844	0	CG9336
FBgn0034005	0	2.88744	0.997	0.902	0	ItgaPS4
FBgn0032422	0	2.88597	1	0.969	0	atilla
FBgn0030040	0	2.86471	1	0.973	0	CG15347
FBgn0032886	0	2.831	0.995	0.879	0	CG9328
FBgn0266253	0	2.82511	0.994	0.915	0	CR44948
FBgn0037386	0	2.73441	1	0.987	0	CG1208
FBgn0037477	0	2.67094	0.991	0.894	0	CG14610
FBgn0003886	0	2.66455	1	0.998	0	alphaTub85E
FBgn0029932	0	2.65972	0.973	0.762	0	CG4607
FBgn0263380	0	2.65841	0.994	0.917	0	CR43432
FBgn0035498	0	2.62277	0.999	0.941	0	Fit1
FBgn0085359	0	2.59248	0.98	0.864	0	CG34330
FBgn0264895	0	2.51146	0.999	0.917	0	RapGAP1
FBgn0001092	0	2.45009	0.997	0.902	0	Gapdh2
FBgn0041087	0	2.41998	0.993	0.881	0	wun2
FBgn0033504	0	2.41422	0.979	0.828	0	CAP
FBgn0261363	0	2.40588	0.992	0.91	0	PPO3
FBgn0053225	0	2.39778	1	0.967	0	CG33225
FBgn0032318	0	2.38369	0.902	0.785	0	CG14072
FBgn0261561	0	2.37604	0.987	0.878	0	CG42675
FBgn0003218	0	2.28568	0.976	0.773	0	rdgB
FBgn0034219	0	2.25001	0.997	0.905	0	mthl4
FBgn0051729	0	2.22454	0.993	0.827	0	CG31729
FBgn0004636	0	2.19947	0.999	0.969	0	Rap1
FBgn0035708	0	2.15783	0.989	0.833	0	CG8398
FBgn0050035	0	2.13236	0.963	0.854	0	Tret1-1
FBgn0051363	0	2.12233	1	0.986	0	Jupiter
FBgn0040296	0	2.11194	0.929	0.691	0	Ocho
FBgn0014141	0	2.08393	1	0.971	0	cher
FBgn0260442	0	2.07041	1	0.966	0	rhea
FBgn0032400	0	2.06658	0.968	0.864	0	CG6770
FBgn0031080	0	2.0509	0.963	0.843	0	CG12655
FBgn0036742	0	2.00655	0.961	0.809	0	CG7497
FBgn0038088	0	2.00577	0.985	0.876	0	CG10126
FBgn0003748	0	1.98553	0.986	0.922	0	Treh
FBgn0015589	0	1.9831	0.969	0.834	0	Apc
FBgn0027066	0	1.97829	0.999	0.961	0	Eb1
FBgn0004657	0	1.97774	0.999	0.951	0	mys
FBgn0053056	0	1.9776	0.971	0.839	0	CG33056
FBgn0261260	0	1.95648	0.948	0.758	0	mgl
FBgn0029903	0	1.95325	0.995	0.877	0	pod1
FBgn0028916	0	1.94043	0.949	0.767	0	CG33090
FBgn0031791	0	1.9402	0.926	0.771	0	AANATL2
FBgn0265413	0	1.93806	0.997	0.929	0	CG44325
FBgn0086347	0	1.92353	0.997	0.904	0	Myo31DF
FBgn0001987	0	1.92147	0.953	0.805	0	Gli
FBgn0042135	0	1.91741	0.969	0.803	0	CG18812
FBgn0026602	0	1.91682	0.972	0.843	0	Ady43A
FBgn0027657	0	1.88493	0.969	0.849	0	glob1
FBgn0000256	0	1.88394	0.986	0.856	0	capu
FBgn0016672	0	1.87366	0.965	0.818	0	Ipp
FBgn0015229	0	1.8696	0.953	0.72	0	glec
FBgn0004397	0	1.86123	0.981	0.869	0	Vinc
FBgn0003890	0	1.8393	0.989	0.875	0	betaTub97EF
FBgn0010397	0	1.83566	0.999	0.916	0	LamC
FBgn0261261	0	1.82163	0.935	0.815	0	plx
FBgn0031307	0	1.78572	0.967	0.856	0	MFS3
FBgn0038206	0	1.7713	0.98	0.868	0	twf
FBgn0040551	0	1.76804	0.983	0.899	0	CG11686
FBgn0026084	0	1.76148	1	0.996	0	cib
FBgn0033448	0	1.76099	0.963	0.837	0	hebe
FBgn0001258	0	1.7607	0.889	0.661	0	ImpL3
FBgn0259228	0	1.75082	0.982	0.85	0	C3G
FBgn0026189	0	1.73787	0.992	0.883	0	prominin-like
FBgn0029507	0	1.7086	0.979	0.872	0	Tsp42Ed
FBgn0031213	0	1.70397	0.971	0.859	0	galectin
FBgn0030412	0	1.70379	0.935	0.684	0	Tomosyn
FBgn0022709	0	1.66784	0.935	0.783	0	Adk1
FBgn0086355	0	1.65601	0.959	0.778	0	Tpi
FBgn0039747	0	1.65255	0.91	0.803	0	AdoR
FBgn0038679	0	1.65034	0.95	0.816	0	CG6040
FBgn0000253	0	1.63708	1	1	0	Cam
FBgn0034443	0	1.63205	0.999	0.977	0	cer
FBgn0031150	0	1.62456	0.926	0.78	0	bves
FBgn0024238	0	1.62367	0.993	0.934	0	Fim
FBgn0043070	0	1.59861	0.995	0.912	0	MESK2
FBgn0032857	0	1.59314	0.903	0.757	0	CG10947
FBgn0032140	0	1.58725	0.998	0.94	0	CG13117
FBgn0026374	0	1.58673	0.949	0.811	0	Rhp
FBgn0003447	0	1.58437	0.938	0.731	0	sn
FBgn0004456	0	1.58111	0.97	0.838	0	mew
FBgn0085452	0	1.5639	0.967	0.885	0	CG34423
FBgn0033033	0	1.55984	0.916	0.832	0	scaf
FBgn0052412	0	1.55662	0.959	0.854	0	QC
FBgn0037720	0	1.54534	0.957	0.822	0	CG8312
FBgn0033926	0	1.54091	0.999	0.976	0	Arc1
FBgn0024150	0	1.53481	0.946	0.806	0	Ac78C
FBgn0034720	0	1.51157	0.91	0.697	0	Liprin-gamma
FBgn0265991	0	1.48363	0.972	0.863	0	Zasp52
FBgn0028984	0	1.481	0.972	0.852	0	Spn88Ea
FBgn0014011	0	1.46215	0.996	0.95	0	Rac2
FBgn0263346	0	1.45973	0.906	0.744	0	CG43427
FBgn0028427	0	1.45778	0.991	0.912	0	Ilk
FBgn0020304	0	1.4541	0.958	0.824	0	drongo
FBgn0259977	0	1.45119	0.928	0.774	0	Tdc1
FBgn0020251	0	1.4504	0.885	0.76	0	sfl
FBgn0000042	0	1.44319	1	1	0	Act5C
FBgn0262582	0	1.43666	0.957	0.752	0	cic
FBgn0029095	0	1.43508	0.992	0.907	0	aru
FBgn0283712	0	1.42585	0.92	0.723	0	LIMK1
FBgn0263930	0	1.41577	0.873	0.663	0	dally
FBgn0031090	0	1.4122	0.98	0.86	0	Rab35
FBgn0014869	0	1.40845	0.952	0.785	0	Pglym78
FBgn0033188	0	1.40207	0.931	0.83	0	Drat
FBgn0010395	0	1.39828	0.921	0.777	0	Itgbn
FBgn0266417	0	1.39391	0.959	0.81	0	CG45057
FBgn0263077	0	1.34919	0.935	0.828	0	CG43340
FBgn0036752	0	1.34592	0.935	0.843	0	Adgf-A
FBgn0019968	0	1.33922	0.924	0.77	0	Khc-73
FBgn0035964	0	1.33311	0.922	0.772	0	Dhpr
FBgn0034894	0	1.33056	0.975	0.887	0	sigmar
FBgn0259243	0	1.32921	0.933	0.724	0	Pka-R1
FBgn0034638	0	1.32675	0.906	0.767	0	CG10433
FBgn0052672	0	1.32246	0.99	0.929	0	Atg8a
FBgn0015795	0	1.3224	0.986	0.902	0	Rab7
FBgn0032010	0	1.31462	0.915	0.765	0	CG8086
FBgn0085354	0	1.29798	0.883	0.7	0	CG34325
FBgn0003206	0	1.29419	0.954	0.818	0	Ras64B
FBgn0000318	0	1.28665	0.974	0.886	0	cl
FBgn0262160	0	1.28068	0.962	0.813	0	CG9932
FBgn0000723	0	1.28036	0.963	0.854	0	FER
FBgn0028546	0	1.27726	0.972	0.867	0	ics
FBgn0035587	0	1.27502	0.881	0.665	0	Gdap1
FBgn0030847	0	1.2706	0.903	0.642	0	CG12991
FBgn0015765	0	1.26683	0.959	0.878	0	p38a
FBgn0033446	0	1.26594	0.984	0.894	0	CG1648
FBgn0259481	0	1.26564	0.966	0.835	0	Mob2
FBgn0029131	0	1.25956	0.972	0.868	0	Debcl
FBgn0012051	0	1.25264	0.965	0.856	0	CalpA
FBgn0000579	0	1.25041	0.989	0.891	0	Eno
FBgn0014133	0	1.24182	0.979	0.877	0	bif
FBgn0001105	0	1.24001	1	0.984	0	Gbeta13F
FBgn0025628	0	1.23147	0.932	0.851	0	CG4199
FBgn0265191	0	1.22856	0.911	0.699	0	Glycogenin
FBgn0000083	0	1.22531	1	0.996	0	AnxB9
FBgn0053494	0	1.22418	0.997	0.961	0	CG33494
FBgn0040206	0	1.22019	0.937	0.803	0	krz
FBgn0037468	0	1.21984	0.985	0.917	0	CG1943
FBgn0031457	0	1.21766	0.91	0.82	0	CG3077
FBgn0039108	0	1.20448	0.917	0.754	0	CG10232
FBgn0261565	0	1.2016	0.861	0.697	0	Lmpt
FBgn0041789	0	1.19468	0.958	0.833	0	Pax
FBgn0266719	0	1.19297	0.888	0.777	0	stac
FBgn0032191	0	1.18248	0.972	0.91	0	CG5734
FBgn0035539	0	1.16771	0.926	0.829	0	slow
FBgn0030670	0	1.16602	0.934	0.782	0	Pis
FBgn0028490	0	1.16577	0.974	0.885	0	CG31705
FBgn0033906	0	1.1588	0.991	0.899	0	CG8331
FBgn0262563	0	1.15743	0.896	0.686	0	CG43103
FBgn0040285	0	1.15709	0.984	0.916	0	Scamp
FBgn0036341	0	1.15509	0.916	0.804	0	Syx13
FBgn0014029	0	1.14318	0.98	0.888	0	2002-09-01
FBgn0050460	0	1.14286	0.849	0.683	0	CG30460
FBgn0038890	0	1.14262	0.933	0.811	0	CG7956
FBgn0050115	0	1.13844	0.914	0.754	0	GEFmeso
FBgn0264693	0	1.13191	0.918	0.752	0	ens
FBgn0032499	0	1.13155	0.908	0.752	0	Uvrag
FBgn0036877	0	1.1196	0.863	0.731	0	CG9452
FBgn0033032	0	1.11193	0.854	0.767	0	kune
FBgn0052528	0	1.10808	0.943	0.828	0	parvin
FBgn0035400	0	1.10309	0.921	0.716	0	CG11537
FBgn0003660	0	1.10209	0.998	0.951	0	Syb
FBgn0051769	0	1.10064	0.844	0.598	0	CG31769
FBgn0036053	0	1.0983	0.934	0.808	0	iPLA2-VIA
FBgn0032731	0	1.09798	0.991	0.948	0	Swip-1
FBgn0259221	0	1.09682	0.883	0.768	0	CG42321
FBgn0027580	0	1.08406	0.849	0.594	0	PCB
FBgn0052066	0	1.06719	0.94	0.768	0	CG32066
FBgn0020249	0	1.06687	0.954	0.863	0	stck
FBgn0011232	0	1.06686	0.904	0.74	0	scat
FBgn0003205	0	1.06671	0.984	0.919	0	Ras85D
FBgn0033635	0	1.06445	0.999	0.98	0	Prip
FBgn0047178	0	1.06323	0.968	0.904	0	CG32147
FBgn0000636	0	1.06317	0.85	0.772	0	Fas3
FBgn0001149	0	1.06182	0.999	0.988	0	GstD1
FBgn0030114	0	1.06008	0.908	0.708	0	CG17754
FBgn0037750	0	1.05811	0.89	0.767	0	Whamy
FBgn0052264	0	1.04858	0.871	0.623	0	CG32264
FBgn0263118	0	1.04549	0.916	0.805	0	tx
FBgn0261244	0	1.04002	0.878	0.729	0	inaE
FBgn0040299	0	1.03851	0.861	0.798	0	Myo28B1
FBgn0003093	0	1.03647	0.904	0.757	0	Pkc98E
FBgn0267487	0	1.03404	0.918	0.784	0	Ptp61F
FBgn0261988	0	1.03342	0.899	0.716	0	Gprk2
FBgn0035203	0	1.02992	0.93	0.803	0	CG9149
FBgn0041188	0	1.02923	0.946	0.825	0	Atx2
FBgn0086370	0	1.02662	0.906	0.777	0	sra
FBgn0003884	0	1.0222	1	0.998	0	alphaTub84B
FBgn0001941	0	1.01339	0.98	0.91	0	ifc
FBgn0264894	0	1.01261	0.84	0.788	0	CG44085
FBgn0262699	0	1.00941	0.912	0.811	0	rap
FBgn0262565	0	1.00404	0.901	0.846	0	CR43105
FBgn0266758	0	1.00158	0.993	0.948	0	Esyt2
FBgn0035879	0	1.00056	0.918	0.826	0	GAPcenA
FBgn0020653	0	0.997382	0.978	0.893	0	Trxr-1
FBgn0039056	0	0.992308	0.908	0.791	0	CenB1A
FBgn0035142	0	0.991884	0.939	0.812	0	Hipk
FBgn0037843	0	0.982738	0.934	0.751	0	CG4511
FBgn0036663	0	0.982392	0.892	0.825	0	CG9674
FBgn0010246	0	0.972334	0.998	0.972	0	Myo61F
FBgn0041182	0	0.969825	0.924	0.839	0	Tep2
FBgn0040850	0	0.969315	0.866	0.793	0	CG15210
FBgn0030160	0	0.968674	0.858	0.781	0	CG9691
FBgn0013765	0	0.966728	0.919	0.838	0	cnn
FBgn0002645	0	0.963964	0.975	0.91	0	Map205
FBgn0267795	0	0.961645	0.999	0.972	0	Frl
FBgn0001091	0	0.954096	0.955	0.881	0	Gapdh1
FBgn0014009	0	0.952642	0.953	0.844	0	Rab2
FBgn0035497	0	0.952131	0.874	0.716	0	CG14995
FBgn0033309	0	0.951672	0.92	0.786	0	CG8735
FBgn0004387	0	0.942763	0.896	0.816	0	Klp98A
FBgn0265174	0	0.939813	0.912	0.789	0	PIG-V
FBgn0036805	0	0.933833	0.963	0.886	0	Chmp1
FBgn0004574	0	0.93047	0.948	0.793	0	Rop
FBgn0011817	0	0.928355	0.918	0.744	0	nmo
FBgn0039026	0	0.926889	0.899	0.747	0	CG7029
FBgn0037387	0	0.924099	0.795	0.701	0	CG1213
FBgn0051195	0	0.920667	0.86	0.687	0	CG31195
FBgn0039113	0	0.919291	0.875	0.656	0	CG10217
FBgn0053111	0	0.914563	0.912	0.79	0	CG33111
FBgn0266410	0	0.913406	0.991	0.923	0	CG45050
FBgn0261458	0	0.91217	1	0.983	0	capt
FBgn0259923	0	0.910334	0.826	0.733	0	2004-09-01
FBgn0010051	0	0.909781	0.892	0.777	0	Itp-r83A
FBgn0035896	0	0.905925	0.892	0.711	0	CG6983
FBgn0037541	0	0.900175	0.829	0.715	0	CG2747
FBgn0033756	0	0.895184	0.956	0.88	0	CG17760
FBgn0034691	0	0.893533	0.911	0.767	0	Synj
FBgn0026315	0	0.88785	0.915	0.859	0	Ugt35a
FBgn0261545	0	0.882284	0.827	0.65	0	CG42663
FBgn0000017	0	0.878974	0.927	0.83	0	Abl
FBgn0029896	0	0.878631	0.734	0.58	0	CG3168
FBgn0001961	0	0.875457	0.996	0.979	0	Arpc1
FBgn0085421	0	0.867609	0.887	0.799	0	Epac
FBgn0003074	0	0.867281	0.878	0.677	0	Pgi
FBgn0267488	0	0.854652	0.852	0.654	0	Mcr
FBgn0024321	0	0.851327	0.837	0.693	0	NK7.1
FBgn0037063	0	0.851012	0.886	0.741	0	CG9391
FBgn0266186	0	0.847362	0.989	0.943	0	Vamp7
FBgn0000273	0	0.846129	0.863	0.708	0	Pka-C1
FBgn0020510	0	0.845857	0.939	0.833	0	Abi
FBgn0040395	0	0.843495	0.89	0.767	0	Unc-76
FBgn0000308	0	0.840159	1	0.99	0	chic
FBgn0003514	0	0.826567	0.991	0.952	0	sqh
FBgn0053113	0	0.825144	0.997	0.97	0	Rtnl1
FBgn0265375	0	0.824237	0.946	0.89	0	CR44316
FBgn0010406	0	0.824142	0.894	0.798	0	RNaseX25
FBgn0037956	0	0.822938	0.763	0.695	0	CG6959
FBgn0030048	0	0.822753	0.918	0.818	0	CG12112
FBgn0036298	0	0.82139	0.916	0.838	0	nst
FBgn0000043	0	0.818689	1	1	0	Act42A
FBgn0085390	0	0.810601	0.809	0.786	0	Dgk
FBgn0085282	0	0.809556	0.923	0.842	0	CG34253
FBgn0086372	0	0.80298	0.913	0.773	0	lap
FBgn0053329	0	0.799832	0.84	0.778	0	Sp212
FBgn0085442	0	0.79827	0.884	0.824	0	NKAIN
FBgn0010894	0	0.794825	0.832	0.697	0	sinu
FBgn0013272	0	0.790987	0.888	0.823	0	Gp150
FBgn0038243	0	0.790843	0.959	0.905	0	CG8066
FBgn0086694	0	0.790783	0.856	0.688	0	Bre1
FBgn0036433	0	0.788006	0.781	0.737	0	CG9628
FBgn0028430	0	0.785313	0.998	0.981	0	He
FBgn0284257	0	0.781964	0.865	0.649	0	Ttd14
FBgn0262716	0	0.780154	0.967	0.89	0	Arp3
FBgn0035432	0	0.77929	0.954	0.882	0	ZnT63C
FBgn0001122	0	0.776621	0.899	0.735	0	Galphao
FBgn0267849	0	0.773301	0.882	0.772	0	Syx7
FBgn0014906	0	0.7678	0.916	0.747	0	Hydr2
FBgn0035603	0	0.76366	0.922	0.841	0	Pfdn4
FBgn0264087	0	0.756527	0.713	0.654	0	Slob
FBgn0026620	0	0.753941	0.905	0.798	0	tacc
FBgn0037647	0	0.745542	0.912	0.84	0	RagA-B
FBgn0034417	0	0.730156	0.863	0.773	0	CG15117
FBgn0036449	0	0.728532	0.862	0.744	0	bmm
FBgn0037465	0	0.725513	0.87	0.829	0	CG1105
FBgn0030141	0	0.724514	0.873	0.642	0	Gga
FBgn0010238	0	0.722215	0.762	0.669	0	Lac
FBgn0046687	0	0.721157	0.893	0.768	0	Tre1
FBgn0032156	0	0.717688	0.874	0.805	0	CG13124
FBgn0285896	0	0.7163	0.804	0.741	0	NA
FBgn0261570	0	0.711935	0.86	0.786	0	CG42684
FBgn0034200	0	0.708429	0.774	0.582	0	Gbp2
FBgn0029504	0	0.705388	0.9	0.714	0	CHES-1-like
FBgn0025631	0	0.70269	0.809	0.754	0	moody
FBgn0259178	0	0.700359	0.836	0.77	0	5PtaseI
FBgn0045842	0	0.687105	0.816	0.546	0	yuri
FBgn0040259	0	0.685313	0.853	0.805	0	Ugt86Da
FBgn0261547	0	0.678635	0.823	0.728	0	Exn
FBgn0263395	0	0.670958	0.793	0.515	0	hppy
FBgn0260945	0	0.662788	0.854	0.784	0	Atg1
FBgn0033134	0	0.660527	0.815	0.73	0	Tsp42El
FBgn0032821	0	0.655516	0.775	0.666	0	CdGAPr
FBgn0262733	0	0.636097	0.828	0.671	0	Src64B
FBgn0041171	0	0.629925	0.839	0.67	0	ago
FBgn0262477	0	0.618655	0.794	0.646	0	FoxP
FBgn0013720	0	0.618352	0.82	0.695	0	pck
FBgn0052296	0	0.613731	0.833	0.626	0	Mrtf
FBgn0039844	0	0.611494	0.796	0.747	0	CG1607
FBgn0036198	0	0.608158	0.852	0.721	0	crim
FBgn0028552	0	0.606797	0.852	0.744	0	gammaSnap1
FBgn0036778	0	0.603287	0.815	0.651	0	Cyp312a1
FBgn0027508	0	0.603261	0.849	0.647	0	Tnks
FBgn0086708	0	0.601402	0.784	0.713	0	stv
FBgn0038098	0	0.591867	0.775	0.674	0	CG7381
FBgn0032955	0	0.581245	0.841	0.791	0	CG2201
FBgn0016078	0	0.577265	0.833	0.794	0	wun
FBgn0037240	0	0.57258	0.812	0.716	0	Cont
FBgn0037166	0	0.568192	0.769	0.715	0	CG11426
FBgn0011661	0	0.554071	0.997	0.987	0	Moe
FBgn0030976	0	0.546658	0.8	0.628	0	CG7378
FBgn0052194	0	0.542896	0.841	0.706	0	CR32194
FBgn0037167	0	0.540921	0.657	0.559	0	CG11425
FBgn0030286	0	0.533127	0.765	0.687	0	CG1657
FBgn0267910	0	0.50761	1	1	0	MRE16
FBgn0036485	0	0.4901	0.694	0.644	0	FucTA
FBgn0039075	0	0.489768	0.713	0.646	0	CG4393
FBgn0031268	0	0.489622	0.831	0.751	0	cold
FBgn0027844	0	0.485094	0.72	0.682	0	CAH1
FBgn0052311	0	0.481162	0.805	0.619	0	zormin
FBgn0037623	0	0.475605	0.792	0.763	0	CG9801
FBgn0260005	0	0.474995	0.722	0.741	0	wtrw
FBgn0004507	0	0.466199	0.803	0.679	0	GlyP
FBgn0028956	0	0.457082	0.878	0.796	0	mthl3
FBgn0028394	0	0.429181	0.863	0.799	0	CG17834
FBgn0259736	0	0.41134	0.733	0.727	0	CG42390
FBgn0032681	0	0.405388	0.711	0.702	0	CG10283
FBgn0033502	0	0.400732	0.709	0.748	0	CG12910
FBgn0265760	0	0.386483	0.772	0.662	0	CR44567
FBgn0039155	0	0.383978	0.668	0.725	0	Kal1
FBgn0032025	0	0.366131	0.847	0.804	0	CG7778
FBgn0262142	0	-0.393268	0.343	0.762	0	CR42868
FBgn0016122	0	-0.430121	0.49	0.806	0	Acer
FBgn0023170	0	-0.478857	1	1	0	RpL39
FBgn0085261	0	-0.63401	0.749	0.857	0	CG34232
FBgn0050463	0	-0.746736	0.704	0.696	0	CG30463
FBgn0085360	0	-0.765825	0.794	0.759	0	CG34331
FBgn0285948	0	-0.77759	0.999	0.999	0	NA
FBgn0261989	0	-0.780315	0.82	0.765	0	CG42807
FBgn0034390	0	-0.810298	0.783	0.8	0	CG15093
FBgn0038476	0	-0.885166	0.743	0.739	0	kuk
FBgn0034880	0	-0.898743	0.643	0.863	0	ItgaPS5
FBgn0039612	0	-0.899939	0.8	0.847	0	CG14523
FBgn0003062	0	-0.924749	0.677	0.756	0	Fib
FBgn0033548	0	-0.925065	0.762	0.855	0	CG7637
FBgn0030234	0	-0.930437	0.819	0.845	0	CG15211
FBgn0028331	0	-0.933553	0.661	0.744	0	l(1)G0289
FBgn0259937	0	-0.949462	0.765	0.789	0	Nop60B
FBgn0032078	0	-0.956526	0.712	0.842	0	C1GalTA
FBgn0034405	0	-0.958654	0.725	0.853	0	Jheh2
FBgn0019952	0	-0.961418	0.774	0.868	0	Orct
FBgn0267033	0	-0.96402	0.598	0.759	0	mamo
FBgn0001226	0	-0.972378	0.661	0.753	0	Hsp27
FBgn0051324	0	-0.984586	0.945	0.987	0	CG31324
FBgn0020415	0	-0.992519	0.902	0.941	0	Idgf2
FBgn0038250	0	-0.998945	0.754	0.813	0	CG3505
FBgn0031914	0	-1.00112	0.716	0.839	0	CG5973
FBgn0032405	0	-1.00193	0.758	0.846	0	firl
FBgn0261385	0	-1.01671	0.76	0.84	0	scra
FBgn0004198	0	-1.02186	0.786	0.854	0	ct
FBgn0034985	0	-1.04055	0.715	0.777	0	CG3328
FBgn0004629	0	-1.04492	0.839	0.872	0	Cys
FBgn0010470	0	-1.04814	0.685	0.77	0	Fkbp14
FBgn0038964	0	-1.05092	0.685	0.809	0	Nop56
FBgn0260768	0	-1.06109	0.745	0.872	0	CG42566
FBgn0033777	0	-1.09705	0.846	0.929	0	CG17574
FBgn0259111	0	-1.09834	0.665	0.832	0	Ndae1
FBgn0001089	0	-1.10369	0.778	0.837	0	Gal
FBgn0040102	0	-1.11647	0.79	0.852	0	lectin-24Db
FBgn0259735	0	-1.11925	0.73	0.883	0	CG42389
FBgn0000578	0	-1.12749	0.735	0.838	0	ena
FBgn0028990	0	-1.13257	0.766	0.886	0	Spn27A
FBgn0034139	0	-1.1596	0.698	0.826	0	CG4927
FBgn0030521	0	-1.17155	0.915	0.955	0	CtsB1
FBgn0262656	0	-1.18482	0.67	0.774	0	Myc
FBgn0031327	0	-1.20554	0.96	0.985	0	CG5397
FBgn0038826	0	-1.20692	0.786	0.897	0	Syp
FBgn0051075	0	-1.23729	0.778	0.864	0	CG31075
FBgn0003525	0	-1.24769	0.584	0.724	0	stg
FBgn0086254	0	-1.25323	0.829	0.914	0	CG6084
FBgn0039776	0	-1.26957	0.755	0.888	0	PH4alphaEFB
FBgn0040398	0	-1.27049	0.998	1	0	CG14629
FBgn0004362	0	-1.27743	0.773	0.844	0	HmgD
FBgn0037913	0	-1.29262	0.768	0.834	0	fabp
FBgn0250837	0	-1.29827	0.761	0.846	0	dUTPase
FBgn0036891	0	-1.31079	0.891	0.948	0	CG9372
FBgn0037228	0	-1.31798	0.862	0.922	0	CG1092
FBgn0020414	0	-1.33277	0.888	0.953	0	Idgf3
FBgn0011722	0	-1.35372	0.793	0.84	0	Tig
FBgn0032006	0	-1.35585	0.705	0.859	0	Pvr
FBgn0033153	0	-1.3592	0.795	0.882	0	Gadd45
FBgn0025682	0	-1.35987	0.784	0.857	0	scf
FBgn0034010	0	-1.36279	0.863	0.889	0	CG8157
FBgn0010225	0	-1.41037	0.844	0.912	0	Gel
FBgn0029092	0	-1.42724	0.672	0.847	0	ced-6
FBgn0031453	0	-1.4278	0.892	0.94	0	Bacc
FBgn0022893	0	-1.47304	0.865	0.934	0	Df31
FBgn0041629	0	-1.52011	0.922	0.975	0	Hexo2
FBgn0265048	0	-1.54968	0.734	0.901	0	cv-d
FBgn0010228	0	-1.61064	0.714	0.866	0	HmgZ
FBgn0250848	0	-1.61554	0.865	0.96	0	26-29-p
FBgn0014388	0	-1.61864	0.692	0.848	0	sty
FBgn0027598	0	-1.67553	0.816	0.922	0	cindr
FBgn0243514	0	-1.69544	0.818	0.91	0	eater
FBgn0045823	0	-1.75151	0.948	0.991	0	vsg
FBgn0030993	0	-1.75417	0.849	0.937	0	Mec2
FBgn0004167	0	-1.75419	0.781	0.917	0	kst
FBgn0016075	0	-1.77633	0.84	0.91	0	vkg
FBgn0004449	0	-1.77689	0.715	0.881	0	Ten-m
FBgn0259740	0	-1.78064	0.859	0.947	0	CG42394
FBgn0261628	0	-1.78528	0.715	0.932	0	CG42711
FBgn0028542	0	-1.82056	0.836	0.927	0	NimB4
FBgn0003495	0	-1.83619	0.782	0.923	0	spz
FBgn0267348	0	-1.88095	0.823	0.936	0	LanB2
FBgn0051777	0	-1.93478	0.848	0.963	0	CG31777
FBgn0034398	0	-1.94228	0.9	0.982	0	CG15098
FBgn0025885	0	-1.97365	0.908	0.957	0	Inos
FBgn0034753	0	-1.98732	0.907	0.976	0	CG2852
FBgn0085466	0	-2.02049	0.892	0.977	0	CG34437
FBgn0040752	0	-2.0265	0.686	0.905	0	Prosap
FBgn0030796	0	-2.05705	0.722	0.933	0	CG4829
FBgn0035076	0	-2.0744	0.741	0.909	0	Ance-5
FBgn0051337	0	-2.08944	0.848	0.942	0	CG31337
FBgn0267727	0	-2.09603	0.764	0.93	0	Pen
FBgn0002526	0	-2.1148	0.768	0.921	0	LanA
FBgn0026721	0	-2.1199	0.838	0.939	0	fat-spondin
FBgn0262881	0	-2.16998	0.869	0.95	0	CG43236
FBgn0033949	0	-2.17289	0.784	0.929	0	CG10131
FBgn0259896	0	-2.25985	0.83	0.965	0	NimC1
FBgn0034761	0	-2.28135	0.894	0.989	0	CG4250
FBgn0029093	0	-2.28809	0.88	0.987	0	cathD
FBgn0013763	0	-2.30269	0.907	0.982	0	Idgf6
FBgn0031261	0	-2.39972	0.855	0.962	0	nAChRbeta3
FBgn0030362	0	-2.45922	0.971	0.991	0	regucalcin
FBgn0261800	0	-2.4879	0.823	0.962	0	LanB1
FBgn0029147	0	-2.51893	0.891	0.977	0	NtR
FBgn0033724	0	-2.53693	0.964	0.997	0	CG8501
FBgn0011828	0	-2.85809	0.902	0.99	0	Pxn
FBgn0040813	0	-2.88674	0.996	0.999	0	Nplp2
FBgn0001114	0	-2.93516	0.908	0.988	0	Glt
FBgn0026562	0	-2.97506	0.929	0.994	0	SPARC
FBgn0000299	0	-2.97557	0.894	0.99	0	Col4a1
FBgn0003137	0	-2.99902	0.944	0.995	0	Ppn
FBgn0029167	0	-3.28923	0.945	0.998	0	Hml
FBgn0264343	9.88131291682493e-324	-0.702572	0.653	0.778	1.97626258336499e-320	CG43799
FBgn0052594	1.97626258336499e-323	0.746663	0.877	0.733	3.95252516672997e-320	be
FBgn0028563	2.96439387504748e-323	0.638745	0.847	0.707	5.92878775009496e-320	sut1
FBgn0027611	1.77863632502849e-322	-0.393751	0.74	0.535	3.55727265005698e-319	LManII
FBgn0050069	8.34970941471707e-322	0.507804	0.641	0.49	1.66994188294341e-318	CG30069
FBgn0261556	3.3259511146741e-319	-0.90639	0.704	0.762	6.65190222934821e-316	CG42674
FBgn0026479	3.093409237146e-318	0.662181	0.867	0.766	6.18681847429201e-315	Drp1
FBgn0035204	9.13720064762343e-318	0.425306	0.841	0.722	1.82744012952469e-314	CG2277
FBgn0051092	6.07361543615581e-316	-1.05043	0.838	0.915	1.21472308723116e-312	LpR2
FBgn0015000	1.01466332337804e-315	0.656632	0.873	0.764	2.02932664675608e-312	betaggt-I
FBgn0030400	1.26828353343598e-315	0.708218	0.906	0.718	2.53656706687196e-312	CG11138
FBgn0031805	8.22104855460075e-315	-0.765315	0.684	0.826	1.64420971092015e-311	CG9505
FBgn0011824	1.17178312852031e-314	-0.866936	0.672	0.766	2.34356625704061e-311	CG4038
FBgn0259715	1.52572590039859e-313	-0.74431	0.795	0.835	3.05145180079718e-310	CG42369
FBgn0026713	6.26039789446471e-313	0.716218	0.876	0.686	0	l(1)G0007
FBgn0026196	2.29376836327805e-311	-0.869912	0.735	0.749	4.58754e-308	nop5
FBgn0259173	4.28286750352838e-311	-0.762418	0.692	0.748	8.56574e-308	corn
FBgn0025641	4.50294496849448e-311	0.653518	0.883	0.755	9.00589e-308	DAAM
FBgn0036318	7.56205477532506e-311	0.72523	0.946	0.866	1.51241e-307	Wbp2
FBgn0040236	2.14796537805203e-310	0.632106	0.856	0.786	4.29593e-307	c11.1
FBgn0004647	0	-0.848056	0.607	0.671	2.77249e-305	N
FBgn0000071	4.17587e-308	-0.762632	0.734	0.831	8.35175e-305	Ama
FBgn0038877	8.31982e-308	0.548468	0.796	0.723	1.66396e-304	CG3308
FBgn0036821	3.1322e-307	-0.633106	0.696	0.676	6.26439e-304	CG3961
FBgn0003371	9.2519e-307	0.720483	0.952	0.834	1.85038e-303	sgg
FBgn0039908	2.66823e-306	0.546618	0.769	0.67	5.33646e-303	Asator
FBgn0001624	2.81658e-306	0.774422	0.89	0.706	5.63315e-303	dlg1
FBgn0031374	3.04246e-306	0.683318	0.858	0.757	6.08491e-303	Wdr62
FBgn0039759	1.12384e-305	0.963828	0.811	0.727	2.24767e-302	CG9733
FBgn0283741	6.17823e-305	0.694618	0.824	0.772	1.23565e-301	prage
FBgn0000084	1.9056e-303	0.68124	0.863	0.711	3.8112e-300	AnxB10
FBgn0050389	3.18096e-303	0.578825	0.841	0.765	6.36193e-300	CG30389
FBgn0037680	1.16738e-302	0.529022	0.778	0.684	2.33475e-299	pasi2
FBgn0001248	6.70524e-300	-0.95643	0.892	0.902	1.34105e-296	Idh
FBgn0085443	9.56138e-300	0.592439	0.846	0.71	1.91228e-296	spri
FBgn0264785	7.1581e-299	0.456638	0.853	0.767	1.43162e-295	Hph
FBgn0038720	1.03519e-298	0.627986	0.843	0.732	2.07038e-295	CG6231
FBgn0260746	2.48613e-296	0.526132	0.847	0.793	4.97226e-293	Ect3
FBgn0035715	1.79475e-294	0.663166	0.915	0.822	3.58949e-291	CG10103
FBgn0259711	1.07483e-292	0.502148	0.743	0.717	2.14965e-289	CG42365
FBgn0025683	3.22205e-290	-0.996157	0.776	0.906	6.4441e-287	CG3164
FBgn0027594	5.4127e-290	-0.845917	0.72	0.812	1.08254e-286	drpr
FBgn0264489	1.26355e-289	0.380985	0.806	0.587	2.52709e-286	CG43897
FBgn0259483	2.21575e-289	0.537015	0.881	0.717	4.4315e-286	Mob4
FBgn0001104	4.66432e-287	0.732217	0.952	0.868	9.32864e-284	Galphai
FBgn0024227	8.31711e-286	-0.778049	0.7	0.789	1.66342e-282	aurB
FBgn0031547	1.78549e-285	0.686529	0.905	0.812	3.57098e-282	Sr-CIV
FBgn0025621	4.74603e-284	0.580646	0.837	0.686	9.49206e-281	CG16989
FBgn0031037	3.54337e-283	0.698758	0.833	0.728	7.08674e-280	CG14207
FBgn0266420	4.19969e-283	-0.857945	0.684	0.781	8.39937e-280	Ote
FBgn0028983	9.53682e-283	0.601813	0.875	0.729	1.90736e-279	Spn55B
FBgn0285910	1.78764e-281	0.679573	0.953	0.869	3.57528e-278	NA
FBgn0030328	4.94974e-281	0.702825	0.896	0.779	9.89947e-278	Amun
FBgn0032420	2.27962e-280	0.389395	0.764	0.599	4.55925e-277	CG6583
FBgn0053144	2.57177e-280	0.501684	0.787	0.488	5.14355e-277	CG33144
FBgn0036262	3.81034e-280	-0.778756	0.725	0.812	7.62068e-277	CG6910
FBgn0086558	1.17723e-279	0.752072	0.983	0.941	2.35445e-276	Ubi-p5E
FBgn0030241	1.53064e-279	-0.800882	0.588	0.748	3.06127e-276	feo
FBgn0033212	2.54657e-278	0.613817	0.871	0.777	5.09314e-275	LRR
FBgn0004378	1.41038e-277	-0.738879	0.696	0.731	2.82076e-274	Klp61F
FBgn0038053	7.94641e-277	-0.665801	0.653	0.82	1.58928e-273	CG18549
FBgn0032935	6.05909e-276	0.426359	0.786	0.595	1.21182e-272	Atg18b
FBgn0031030	5.42494e-275	0.695832	0.856	0.688	1.08499e-271	Tao
FBgn0020416	1.31315e-274	-0.979336	0.807	0.912	2.62631e-271	Idgf1
FBgn0029737	5.04874e-271	0.637695	0.893	0.814	1.00975e-267	CG6903
FBgn0023129	1.84538e-270	0.419859	0.818	0.698	3.69077e-267	aay
FBgn0041710	1.08507e-269	0.693404	0.964	0.904	2.17014e-266	yellow-f
FBgn0035425	1.22322e-269	0.654381	0.912	0.831	2.44645e-266	CG17746
FBgn0014163	8.6424e-269	-0.977533	0.879	0.962	1.72848e-265	fax
FBgn0264491	4.65052e-266	0.6593	0.9	0.732	9.30103e-263	how
FBgn0086356	1.67173e-265	-0.640454	0.742	0.746	3.34346e-262	tum
FBgn0029996	6.38597e-265	0.674774	0.883	0.748	1.27719e-261	UbcE2H
FBgn0039045	2.02116e-262	0.533563	0.822	0.717	4.04232e-259	CG17119
FBgn0032208	3.83928e-262	0.602686	0.854	0.724	7.67857e-259	CG5604
FBgn0036857	5.09534e-262	-0.479389	0.725	0.608	1.01907e-258	CG9629
FBgn0000064	1.5589e-261	0.729938	0.959	0.878	3.11779e-258	Ald
FBgn0259734	4.25735e-261	0.389026	0.76	0.615	8.5147e-258	Nost
FBgn0039226	2.23043e-258	0.438712	0.697	0.537	4.46087e-255	Ude
FBgn0003124	4.9355e-258	-0.702714	0.662	0.736	9.87101e-255	polo
FBgn0000147	5.3003e-258	-0.409689	0.545	0.795	1.06006e-254	aurA
FBgn0036299	3.66065e-255	0.395312	0.752	0.568	7.32129e-252	Tsf2
FBgn0265487	5.45896e-254	0.588977	0.806	0.553	1.09179e-250	mbl
FBgn0011705	6.31272e-254	-0.658285	0.635	0.782	1.26254e-250	rost
FBgn0016917	1.95002e-252	-0.707876	0.782	0.732	3.90004e-249	Stat92E
FBgn0284249	2.24598e-252	0.534174	0.845	0.741	4.49197e-249	Adf1
FBgn0050344	5.01525e-252	-0.827545	0.754	0.809	1.00305e-248	CG30344
FBgn0000719	6.38145e-252	-0.600151	0.681	0.723	1.27629e-248	fog
FBgn0036643	8.28762e-251	0.564713	0.861	0.804	1.65752e-247	Syx8
FBgn0004381	1.6064e-249	0.41991	0.78	0.722	3.2128e-246	Klp68D
FBgn0030529	4.26042e-249	0.617624	0.959	0.858	8.52083e-246	Clic
FBgn0002868	1.29375e-248	0.890372	0.967	0.946	2.58751e-245	MtnA
FBgn0031012	1.82831e-247	0.511294	0.773	0.642	3.65663e-244	CG8051
FBgn0040942	8.58111e-247	-0.453916	0.752	0.835	1.71622e-243	CG12643
FBgn0052521	1.85762e-245	0.394008	0.801	0.628	3.71524e-242	CG32521
FBgn0036518	2.10976e-245	0.635766	0.956	0.909	4.21953e-242	RhoGAP71E
FBgn0002924	3.56495e-244	-0.610978	0.745	0.785	7.1299e-241	ncd
FBgn0027558	1.72238e-243	0.436251	0.841	0.764	3.44475e-240	pgant3
FBgn0026570	2.01193e-243	0.396235	0.813	0.772	4.02386e-240	CG5704
FBgn0267001	4.00925e-243	0.528807	0.796	0.783	8.0185e-240	Ten-a
FBgn0038842	9.12741e-243	0.696207	0.975	0.924	1.82548e-239	hdly
FBgn0028663	2.08088e-242	0.64486	0.99	0.946	4.16176e-239	VhaM9.7-b
FBgn0050456	5.51546e-239	-0.530224	0.766	0.729	1.10309e-235	CG30456
FBgn0031913	1.7285e-238	-0.701172	0.767	0.838	3.457e-235	CG5958
FBgn0017581	2.21836e-236	0.702827	0.971	0.923	4.43673e-233	Lk6
FBgn0036309	7.00692e-236	0.539612	0.828	0.741	1.40138e-232	Hip1
FBgn0085478	1.28423e-234	0.626722	0.892	0.766	2.56846e-231	CG34449
FBgn0039466	1.44698e-234	0.425157	0.747	0.719	2.89396e-231	CG5521
FBgn0261549	2.98005e-234	0.431997	0.646	0.564	5.96009e-231	rdgA
FBgn0027929	1.66535e-233	-0.534228	0.72	0.66	3.33071e-230	NimB1
FBgn0050090	1.81743e-233	0.587023	0.877	0.801	3.63486e-230	CG30090
FBgn0002733	3.73646e-233	-0.57879	0.735	0.725	7.47291e-230	E(spl)mbeta-HLH
FBgn0051313	3.68619e-232	0.581564	0.725	0.582	7.37237e-229	CG31313
FBgn0040007	6.30499e-232	-0.610011	0.999	1	1.261e-228	RpL38
FBgn0266521	7.2563e-232	0.695651	0.852	0.83	1.45126e-228	stai
FBgn0004379	8.60662e-232	-0.554361	0.74	0.805	1.72132e-228	Klp67A
FBgn0014469	9.3808e-231	-0.674927	0.831	0.885	1.87616e-227	Cyp4e2
FBgn0031470	1.10539e-230	0.449373	0.868	0.844	2.21078e-227	CG18557
FBgn0035285	1.33984e-230	0.533418	0.835	0.746	2.67968e-227	CG12025
FBgn0260991	2.47102e-230	-0.609054	0.723	0.708	4.94204e-227	Incenp
FBgn0036824	2.88375e-230	-0.562619	0.661	0.734	5.76749e-227	CG3902
FBgn0010905	1.56907e-228	-0.490565	0.614	0.822	3.13815e-225	Spn
FBgn0035236	4.53897e-228	0.623055	0.947	0.874	9.07794e-225	CG12004
FBgn0032956	9.09279e-228	0.536604	0.86	0.675	1.81856e-224	Cul2
FBgn0037315	1.10776e-227	0.507157	0.809	0.739	2.21551e-224	Cerk
FBgn0023407	1.14799e-227	0.528818	0.819	0.752	2.29597e-224	B4
FBgn0020257	1.2986e-227	-0.560345	0.651	0.799	2.5972e-224	Ppa
FBgn0038974	2.36347e-227	-0.575756	0.709	0.826	4.72695e-224	CG5377
FBgn0028671	6.01521e-227	0.565894	0.916	0.854	1.20304e-223	Vha100-1
FBgn0266569	9.43677e-226	-0.959092	0.85	0.896	1.88735e-222	CG42259
FBgn0035888	1.09455e-224	-0.588328	0.729	0.788	2.18909e-221	CG7120
FBgn0266376	1.49725e-224	-0.55755	0.627	0.574	2.99449e-221	CR45018
FBgn0010314	2.49122e-224	-0.521063	0.721	0.779	4.98243e-221	Cks30A
FBgn0041585	6.57354e-224	0.612	0.917	0.85	1.31471e-220	olf186-F
FBgn0004584	9.68649e-224	-0.647772	0.731	0.792	1.9373e-220	Rrp1
FBgn0015221	1.34675e-223	-0.87644	0.932	0.96	2.69351e-220	Fer2LCH
FBgn0031973	3.94728e-223	-0.556328	0.754	0.817	7.89457e-220	Spn28Dc
FBgn0032105	2.74993e-221	-0.650063	0.766	0.785	5.49987e-218	borr
FBgn0040212	6.46245e-220	0.433273	0.805	0.758	1.29249e-216	Dhap-at
FBgn0030994	8.09545e-220	-0.658057	0.756	0.787	1.61909e-216	HP1D3csd
FBgn0035049	8.39328e-220	0.873836	0.812	0.771	1.67866e-216	Mmp1
FBgn0001308	3.35314e-218	0.545195	0.886	0.732	6.70628e-215	Khc
FBgn0264437	7.12792e-218	-0.662908	0.657	0.792	1.42558e-214	CR43855
FBgn0012034	8.60141e-218	0.553614	0.843	0.719	1.72028e-214	AcCoAS
FBgn0030955	1.70245e-216	0.599625	0.997	0.982	3.4049e-213	CG6891
FBgn0038037	1.72259e-216	0.586421	0.919	0.859	3.44519e-213	Cyp9f2
FBgn0250906	1.60633e-215	0.567385	0.912	0.818	3.21265e-212	Pgk
FBgn0051637	1.02239e-213	-0.687139	0.67	0.759	2.04478e-210	CG31637
FBgn0015399	2.20388e-213	-0.538749	0.721	0.695	4.40777e-210	kek1
FBgn0033725	4.55137e-213	-0.798825	0.566	0.592	9.10273e-210	Cpr49Ac
FBgn0027783	1.12288e-211	-0.468636	0.517	0.741	2.24576e-208	SMC2
FBgn0029118	1.25143e-211	-0.590429	0.662	0.762	2.50287e-208	Sucb
FBgn0035237	3.58356e-211	0.367842	0.729	0.709	7.16712e-208	CG13917
FBgn0030326	4.50722e-211	-0.51941	0.805	0.735	9.01443e-208	CG2444
FBgn0010768	3.57441e-210	0.394083	0.757	0.735	7.14882e-207	sqz
FBgn0031143	4.42375e-209	0.586293	0.933	0.867	8.8475e-206	CG1532
FBgn0031637	2.31753e-208	0.526331	0.871	0.804	4.63506e-205	mxt
FBgn0034736	7.83567e-207	-0.430903	0.718	0.617	1.56713e-203	gas
FBgn0039487	9.95085e-207	-0.635675	0.749	0.732	1.99017e-203	gb
FBgn0004380	1.26297e-206	0.391663	0.799	0.755	2.52594e-203	Klp64D
FBgn0033081	1.40477e-206	-0.664488	0.758	0.77	2.80955e-203	geminin
FBgn0031878	2.04057e-206	-0.474094	0.655	0.785	4.08113e-203	sip2
FBgn0267390	4.18728e-206	0.460471	0.805	0.675	8.37455e-203	dop
FBgn0033544	4.68294e-206	0.493065	0.825	0.664	9.36587e-203	CG7220
FBgn0015396	3.02601e-205	-0.524904	0.652	0.736	6.05202e-202	jumu
FBgn0001233	4.28203e-205	-0.603352	0.915	0.889	8.56407e-202	Hsp83
FBgn0011747	1.27807e-204	0.572391	0.929	0.817	2.55613e-201	Ank
FBgn0050148	1.43039e-204	0.508755	0.714	0.532	2.86078e-201	CG30148
FBgn0040091	4.48248e-203	-0.634391	0.629	0.723	8.96497e-200	Ugt58Fa
FBgn0032906	7.93285e-203	-0.535919	0.619	0.738	1.58657e-199	RPA2
FBgn0053465	1.32762e-201	-0.416532	0.406	0.655	2.65525e-198	CG33465
FBgn0039928	2.53396e-201	0.514879	0.825	0.624	5.06792e-198	Cals
FBgn0001296	4.65473e-201	-0.407437	0.686	0.581	9.30947e-198	kar
FBgn0035209	9.3722e-201	-0.49352	0.769	0.725	1.87444e-197	msd1
FBgn0002873	9.80357e-201	-0.611856	0.631	0.683	1.96071e-197	mud
FBgn0039132	1.25458e-200	0.512885	0.849	0.706	2.50916e-197	AP-1sigma
FBgn0005655	1.44519e-200	-0.737641	0.741	0.8	2.89037e-197	PCNA
FBgn0024320	1.64267e-200	-0.658613	0.798	0.865	3.28534e-197	Npc1a
FBgn0040382	2.43593e-200	-0.492751	0.685	0.802	4.87186e-197	CG5273
FBgn0262794	1.23329e-198	-0.696347	0.745	0.818	2.46658e-195	CG43175
FBgn0033996	1.56579e-198	0.442508	0.802	0.655	3.13159e-195	CG11807
FBgn0261444	2.24186e-197	-0.709462	0.675	0.786	4.48372e-194	CG3638
FBgn0263289	1.08042e-196	0.495198	0.796	0.666	2.16085e-193	scrib
FBgn0016081	1.66852e-196	0.474521	0.777	0.704	3.33704e-193	fry
FBgn0000547	6.74658e-196	0.445749	0.799	0.515	1.34932e-192	ed
FBgn0034091	8.8523e-196	0.552883	0.835	0.702	1.77046e-192	mrj
FBgn0261862	2.44519e-195	-0.54681	0.67	0.803	4.89037e-192	whd
FBgn0010300	8.55916e-194	-0.515224	0.654	0.633	1.71183e-190	brat
FBgn0004106	8.68156e-194	-0.481362	0.736	0.78	1.73631e-190	Cdk1
FBgn0051158	9.19723e-194	0.483655	0.826	0.68	1.83945e-190	Efa6
FBgn0031738	1.41495e-193	-0.57178	0.716	0.709	2.8299e-190	CG9171
FBgn0030052	3.36171e-193	0.497479	0.998	0.979	6.72342e-190	CG12065
FBgn0032946	8.31117e-193	-0.428324	0.522	0.731	1.66223e-189	nrv3
FBgn0022787	2.26667e-192	0.488333	0.808	0.788	4.53335e-189	Hel89B
FBgn0037705	2.31338e-192	0.524507	0.831	0.631	4.62676e-189	mura
FBgn0033928	6.02829e-190	0.44718	0.886	0.806	1.20566e-186	Arc2
FBgn0004908	8.86397e-190	0.399302	0.845	0.775	1.77279e-186	Arl2
FBgn0029969	1.78342e-189	-0.633925	0.72	0.788	3.56683e-186	CG10932
FBgn0035083	2.64689e-188	-0.381553	0.757	0.766	5.29377e-185	Tina-1
FBgn0039613	6.68869e-188	-0.409779	0.668	0.782	1.33774e-184	CG14527
FBgn0033373	7.58553e-188	-0.668331	0.769	0.78	1.51711e-184	CG8080
FBgn0266000	1.21704e-187	0.587691	0.86	0.7	2.43409e-184	CG44774
FBgn0002466	3.14941e-187	-0.423999	0.755	0.695	6.29882e-184	sti
FBgn0011666	8.14337e-187	0.549106	0.948	0.861	1.62867e-183	msi
FBgn0032864	1.02128e-186	-0.658999	0.812	0.808	2.04256e-183	CG2493
FBgn0283666	1.44348e-186	0.49697	0.84	0.733	2.88696e-183	Rap2l
FBgn0003076	4.85807e-186	0.373704	0.824	0.784	9.71614e-183	Pgm
FBgn0261445	1.53258e-185	-0.503969	0.757	0.809	3.06516e-182	sgl
FBgn0039505	2.01025e-185	0.477311	0.872	0.75	4.0205e-182	CG5934
FBgn0003502	2.44913e-185	-0.425942	0.637	0.598	4.89827e-182	Btk29A
FBgn0037094	1.3729e-184	0.509064	0.842	0.744	2.7458e-181	CG7611
FBgn0285992	1.59229e-184	0.466689	0.813	0.619	3.18457e-181	NA
FBgn0011606	4.35989e-184	-0.430247	0.556	0.739	8.71977e-181	Klp3A
FBgn0026090	9.56265e-184	0.501787	0.878	0.819	1.91253e-180	CG14812
FBgn0037354	3.31657e-183	-0.519272	0.729	0.811	6.63315e-180	CG12171
FBgn0051710	4.77054e-183	0.436775	0.835	0.728	9.54108e-180	CG31710
FBgn0035444	4.94266e-183	0.480974	0.865	0.755	9.88532e-180	CG12012
FBgn0031566	5.28234e-182	0.49368	0.811	0.675	1.05647e-178	CG2818
FBgn0050414	6.36348e-182	-0.503656	0.634	0.695	1.2727e-178	CG30414
FBgn0020633	1.50193e-181	-0.466028	0.741	0.699	3.00385e-178	Mcm7
FBgn0010786	2.70942e-181	-0.546321	0.566	0.749	5.41883e-178	l(3)02640
FBgn0028480	1.00167e-180	0.482009	0.851	0.782	2.00334e-177	CG17841
FBgn0034970	1.59794e-180	0.51885	0.887	0.811	3.19588e-177	yki
FBgn0086532	4.77302e-180	0.524395	0.94	0.874	9.54603e-177	Spt-I
FBgn0013759	9.28954e-180	0.411663	0.765	0.66	1.85791e-176	CASK
FBgn0061198	1.54031e-179	0.482895	0.957	0.906	3.08062e-176	HSPC300
FBgn0010441	7.80587e-179	0.422716	0.857	0.789	1.56117e-175	pll
FBgn0031824	3.24631e-178	-0.45626	0.737	0.759	6.49263e-175	CG9547
FBgn0284220	1.14621e-177	-0.543207	0.758	0.699	2.29241e-174	Top2
FBgn0024920	1.60359e-177	-0.46959	0.738	0.784	3.20718e-174	Ts
FBgn0034194	3.89377e-176	-0.531928	0.742	0.73	7.78755e-173	CG15611
FBgn0016126	5.30802e-176	0.456249	0.81	0.766	1.0616e-172	CaMKI
FBgn0034915	6.08561e-175	-0.538246	0.581	0.721	1.21712e-171	eIF6
FBgn0045073	7.16663e-174	0.485892	0.921	0.881	1.43333e-170	Stim
FBgn0038516	2.75768e-173	0.478619	0.772	0.724	5.51535e-170	P5cr-2
FBgn0029148	1.30673e-169	-0.477422	0.705	0.716	2.61347e-166	NHP2
FBgn0034501	1.37634e-169	0.51368	0.833	0.733	2.75269e-166	CG13868
FBgn0010350	2.38184e-169	0.417666	0.821	0.697	4.76367e-166	CdsA
FBgn0259175	1.26312e-168	0.384537	0.757	0.641	2.52624e-165	ome
FBgn0033551	1.37695e-168	0.403406	0.813	0.673	2.75389e-165	CG7222
FBgn0001086	2.24283e-168	-0.476522	0.669	0.721	4.48565e-165	fzy
FBgn0013718	5.51965e-168	0.490587	0.876	0.814	1.10393e-164	nuf
FBgn0261802	6.16116e-168	-0.525897	0.696	0.815	1.23223e-164	CG42748
FBgn0016059	1.80863e-167	0.558878	0.891	0.873	3.61726e-164	Sema1b
FBgn0032421	3.87526e-167	0.447599	0.85	0.814	7.75052e-164	crok
FBgn0020386	9.37107e-167	-0.554416	0.541	0.722	1.87421e-163	Pdk1
FBgn0032253	1.15323e-166	-0.362662	0.751	0.655	2.30646e-163	LManI
FBgn0011703	2.44466e-166	-0.476002	0.693	0.702	4.88931e-163	RnrL
FBgn0040837	3.73974e-164	-0.406083	0.731	0.599	7.47949e-161	CG8620
FBgn0025814	1.23292e-162	-0.530176	0.784	0.85	2.46584e-159	Mgstl
FBgn0025815	2.35938e-162	-0.368984	0.764	0.651	4.71876e-159	Mcm6
FBgn0039250	2.61817e-161	-0.461284	0.615	0.698	5.23633e-158	Mink
FBgn0062440	6.87894e-161	0.426119	0.867	0.811	1.37579e-157	CG17680
FBgn0032050	2.02083e-160	-0.538429	0.538	0.659	4.04166e-157	CG13096
FBgn0013770	1.36563e-158	-0.655213	0.991	0.995	2.73126e-155	Cp1
FBgn0266421	7.04473e-158	-0.576728	0.777	0.806	1.40895e-154	RPA3
FBgn0033987	1.07881e-157	-0.447472	0.713	0.688	2.15763e-154	ckn
FBgn0001224	2.79366e-157	-0.585211	0.793	0.82	5.58731e-154	Hsp23
FBgn0035589	8.00093e-156	0.372632	0.85	0.826	1.60019e-152	CHMP2B
FBgn0032919	8.68935e-156	-0.418033	0.719	0.626	1.73787e-152	CG9253
FBgn0036728	1.78616e-155	-0.676826	0.933	0.941	3.57232e-152	UQCR-Q
FBgn0000405	2.12025e-155	-0.470946	0.571	0.676	4.24051e-152	CycB
FBgn0032147	6.53856e-154	-0.43057	0.704	0.742	1.30771e-150	IP3K1
FBgn0033978	1.7843e-153	-0.451981	0.712	0.712	3.5686e-150	Cyp6a23
FBgn0028424	3.53917e-153	0.404241	0.853	0.838	7.07834e-150	JhI-26
FBgn0029823	8.94735e-153	-0.428158	0.69	0.657	1.78947e-149	CG3011
FBgn0040232	1.05512e-151	-0.392426	0.702	0.736	2.11024e-148	cmet
FBgn0034248	1.49781e-151	0.451935	0.887	0.752	2.99562e-148	CG14483
FBgn0039419	4.34921e-151	-0.42145	0.538	0.597	8.69843e-148	CG12290
FBgn0025335	2.2355e-150	0.434404	0.877	0.797	4.47101e-147	CG4585
FBgn0034399	4.43118e-150	-0.507624	0.639	0.779	8.86236e-147	CG15083
FBgn0267698	5.42655e-150	0.419045	0.765	0.664	1.08531e-146	Pak
FBgn0027601	1.21734e-149	-0.523741	0.732	0.811	2.43467e-146	pdgy
FBgn0011692	2.94903e-149	-0.392718	0.455	0.63	5.89806e-146	pav
FBgn0261108	8.04681e-149	0.431506	0.827	0.739	1.60936e-145	Atg13
FBgn0002542	1.20475e-147	-0.535999	0.636	0.708	2.4095e-144	lds
FBgn0015801	1.61248e-147	0.47657	0.859	0.757	3.22496e-144	Reg-5
FBgn0263260	3.17706e-147	-0.516754	0.646	0.744	6.35411e-144	sel
FBgn0033244	3.19372e-147	0.405372	0.833	0.756	6.38745e-144	CG8726
FBgn0015222	5.0961e-146	-0.698037	0.937	0.962	1.01922e-142	Fer1HCH
FBgn0032848	1.89839e-144	-0.368076	0.691	0.739	3.79677e-141	nesd
FBgn0011704	3.95912e-144	-0.410507	0.807	0.757	7.91825e-141	RnrS
FBgn0022774	2.54293e-143	-0.551911	0.728	0.781	5.08587e-140	Oat
FBgn0038353	4.10015e-143	-0.599732	0.654	0.726	8.20031e-140	CG5399
FBgn0263039	4.78298e-143	-0.553491	0.542	0.659	9.56597e-140	CR43334
FBgn0286198	1.29509e-141	-0.555997	0.623	0.692	2.59018e-138	NA
FBgn0001168	2.21273e-139	-0.63213	0.627	0.741	4.42545e-136	h
FBgn0250785	5.587e-139	0.432597	0.901	0.811	1.1174e-135	vari
FBgn0037231	8.14845e-139	0.37675	0.873	0.788	1.62969e-135	Vps24
FBgn0033051	2.51073e-137	0.364234	0.836	0.795	5.02145e-134	Strica
FBgn0266696	4.30775e-136	-0.50856	0.736	0.715	8.6155e-133	CG45186
FBgn0011837	3.79164e-134	-0.572911	0.91	0.915	7.58328e-131	Tis11
FBgn0261560	5.04632e-134	0.409355	0.854	0.829	1.00926e-130	Thor
FBgn0029608	5.39807e-133	-0.407393	0.729	0.821	1.07961e-129	CG3091
FBgn0038149	1.90399e-131	0.414436	0.803	0.822	3.80799e-128	GILT1
FBgn0033121	2.25051e-131	0.362968	0.801	0.746	4.50103e-128	Cyp6u1
FBgn0040907	6.29668e-131	-0.581498	0.822	0.872	1.25934e-127	mRpL33
FBgn0010387	3.03262e-130	0.409491	0.833	0.867	6.06523e-127	Dbi
FBgn0030876	3.89734e-129	0.425767	0.794	0.765	7.79467e-126	CG6762
FBgn0041094	1.17706e-128	-0.570486	0.706	0.729	2.35411e-125	scyl
FBgn0030520	9.19118e-127	-0.610515	0.813	0.837	1.83824e-123	Pdcd4
FBgn0259876	1.28007e-125	-0.419554	0.621	0.719	2.56015e-122	Cap-G
FBgn0036101	3.37415e-125	-0.476953	0.757	0.829	6.74829e-122	NijA
FBgn0031049	6.03867e-125	-0.568791	0.86	0.853	1.20773e-121	Sec61gamma
FBgn0058469	1.29583e-124	0.464705	0.987	0.965	2.59165e-121	CR40469
FBgn0015371	2.78023e-124	-0.383606	0.559	0.689	5.56046e-121	chn
FBgn0040099	8.24177e-124	-0.701133	0.943	0.969	1.64835e-120	lectin-28C
FBgn0263200	2.22324e-123	-0.404143	0.617	0.657	4.44648e-120	Galt
FBgn0039737	9.79133e-123	-0.380561	0.651	0.783	1.95827e-119	CG7920
FBgn0050046	6.23713e-122	-0.45609	0.617	0.646	1.24743e-118	CG30046
FBgn0036816	6.97472e-121	0.415699	0.828	0.7	1.39494e-117	Indy
FBgn0051219	7.64562e-121	-0.502462	0.748	0.813	1.52912e-117	CG31219
FBgn0010039	2.13558e-119	0.492672	0.908	0.852	4.27117e-116	GstD3
FBgn0039969	2.39789e-118	0.409952	0.924	0.875	4.79577e-115	Fis1
FBgn0034221	2.74712e-118	-0.584755	0.877	0.818	5.49424e-115	CG10764
FBgn0037536	9.70663e-117	0.369582	0.823	0.729	1.94133e-113	CG2698
FBgn0038320	1.58537e-116	0.375132	0.873	0.797	3.17074e-113	Sra-1
FBgn0270926	1.34698e-115	-0.402924	0.683	0.715	2.69397e-112	AsnS
FBgn0035868	9.15028e-115	-0.368336	0.637	0.69	1.83006e-111	CG7194
FBgn0010173	2.52297e-112	-0.447518	0.729	0.754	5.04595e-109	RpA-70
FBgn0031069	3.17698e-112	-0.483844	0.764	0.832	6.35397e-109	Pmp70
FBgn0039886	5.87825e-111	-0.449213	0.719	0.71	1.17565e-107	CG2003
FBgn0034245	1.07763e-110	-0.551318	0.924	0.911	2.15526e-107	UQCR-6.4
FBgn0010379	1.36377e-110	0.371748	0.783	0.723	2.72753e-107	Akt1
FBgn0036043	1.27159e-109	0.429619	0.895	0.834	2.54319e-106	CG8177
FBgn0041180	1.36105e-109	0.395303	0.954	0.916	2.7221e-106	Tep4
FBgn0031663	9.6191e-109	-0.417882	0.696	0.704	1.92382e-105	CG8891
FBgn0037989	9.59759e-106	-0.46039	0.594	0.643	1.91952e-102	ATP8B
FBgn0029937	5.03474e-105	0.364893	0.869	0.818	1.00695e-101	CG8300
FBgn0031055	6.32719e-100	-0.390517	0.639	0.774	1.26544e-96	et
FBgn0030943	2.58018e-98	-0.402494	0.695	0.705	5.16036e-95	CG6540
FBgn0000261	3.05371e-98	-0.506144	0.782	0.801	6.10742e-95	Cat
FBgn0036147	1.30855e-97	-0.601284	0.932	0.946	2.61709e-94	Plod
FBgn0034142	1.00231e-96	-0.363499	0.796	0.808	2.00461e-93	CG8306
FBgn0020513	7.20581e-93	-0.484279	0.714	0.751	1.44116e-89	ade5
FBgn0021979	2.14505e-91	-0.407298	0.697	0.795	4.2901e-88	l(2)k09913
FBgn0040064	4.76105e-90	-0.494357	0.797	0.859	9.5221e-87	yip2
FBgn0019661	6.5554e-89	-0.742179	0.892	0.911	1.31108e-85	roX1
FBgn0036144	3.69875e-87	-0.467429	0.845	0.848	7.39749e-84	GlcAT-P
FBgn0012037	3.76536e-83	-0.479925	0.905	0.928	7.53071e-80	Ance
FBgn0052267	8.96012e-80	-0.373711	0.658	0.727	1.79202e-76	CG32267
FBgn0014865	1.51005e-73	-0.422012	0.809	0.856	3.02011e-70	Mtk
FBgn0027280	1.80078e-73	-0.365558	0.69	0.812	3.60157e-70	l(1)G0193
FBgn0010113	2.41695e-72	-0.433705	0.884	0.88	4.8339e-69	hdc
FBgn0085468	1.37803e-57	-0.428003	0.868	0.9	2.75605e-54	ND-MWFE
FBgn0043841	1.94666e-54	-0.44675	0.917	0.912	3.89333e-51	vir-1
FBgn0015031	2.84383e-54	-0.446305	0.959	0.956	5.68765e-51	cype
FBgn0045852	2.02694e-53	-0.392086	0.725	0.788	4.05388e-50	ham
FBgn0051523	5.99235e-40	-0.362586	0.799	0.84	1.19847e-36	CG31523
FBgn0265140	1.80448e-29	-0.369578	0.971	0.968	3.60896e-26	Meltrin
FBgn0283437	2.57419e-28	-0.443682	0.951	0.903	5.14838e-25	PPO1
FBgn0042106	5.31469e-25	-0.428486	0.87	0.867	1.06294e-21	CG18754

## Sheet: Panel E - GO enrichment
GO enrichment for genes upregulated in LAM3
GO ID	Term	Ont	N	DE	P.DE	ADJ	Genes	frequency	log10 p-value	uniqueness	dispensability	representative	eliminated
GO:0007010	cytoskeleton organization	BP	177	24	1.98159e-05	0.0116035	FBgn0004397 FBgn0026084 FBgn0000042 FBgn0259228 FBgn0029903 FBgn0003447 FBgn0283712 FBgn0004456 FBgn0024238 FBgn0000256 FBgn0027066 FBgn0033504 FBgn0000253 FBgn0013733 FBgn0010397 FBgn0265991 FBgn0014011 FBgn0260442 FBgn0051363 FBgn0038206 FBgn0014141 FBgn0015589 FBgn0004657 FBgn0028427	0.00786	-1.9354	0.491	0.616	97435	1
GO:0007015	actin filament organization	BP	50	11	5.97711e-05	0.0283873	FBgn0026084 FBgn0003447 FBgn0004456 FBgn0024238 FBgn0000256 FBgn0033504 FBgn0010397 FBgn0014011 FBgn0038206 FBgn0014141 FBgn0004657	0.0024	-1.5469	0.412	0.949	97435	1
GO:0007155	cell adhesion	BP	69	13	7.04429e-05	0.0295197	FBgn0004397 FBgn0004456 FBgn0001987 FBgn0033504 FBgn0034005 FBgn0265991 FBgn0004636 FBgn0035498 FBgn0260442 FBgn0261261 FBgn0015229 FBgn0004657 FBgn0028427	0.00544	-1.5299	0.639	0.809	7160	1
GO:0007160	cell-matrix adhesion	BP	12	6	1.87194e-05	0.0116035	FBgn0004456 FBgn0034005 FBgn0265991 FBgn0035498 FBgn0004657 FBgn0028427	0.00051	-1.9354	0.639	0	7160	0
GO:0016203	muscle attachment	BP	17	8	1.18426e-06	0.00120524	FBgn0259228 FBgn0004456 FBgn0033504 FBgn0013733 FBgn0014011 FBgn0260442 FBgn0004657 FBgn0028427	3e-05	-2.9189	0.607	0.051	16203	0
GO:0022610	biological adhesion	BP	69	13	7.04429e-05	0.0295197	FBgn0004397 FBgn0004456 FBgn0001987 FBgn0033504 FBgn0034005 FBgn0265991 FBgn0004636 FBgn0035498 FBgn0260442 FBgn0261261 FBgn0015229 FBgn0004657 FBgn0028427	0.0055	-1.5299	0.791	0	22610	0
GO:0030029	actin filament-based process	BP	91	18	1.14047e-06	0.00120524	FBgn0026084 FBgn0259228 FBgn0029903 FBgn0003447 FBgn0283712 FBgn0004456 FBgn0024238 FBgn0000256 FBgn0033504 FBgn0000253 FBgn0013733 FBgn0010397 FBgn0265991 FBgn0014011 FBgn0260442 FBgn0038206 FBgn0014141 FBgn0004657	0.00398	-2.9189	0.669	0.167	30029	0
GO:0030036	actin cytoskeleton organization	BP	87	17	2.81924e-06	0.00251053	FBgn0026084 FBgn0259228 FBgn0029903 FBgn0003447 FBgn0283712 FBgn0004456 FBgn0024238 FBgn0000256 FBgn0033504 FBgn0013733 FBgn0010397 FBgn0265991 FBgn0014011 FBgn0260442 FBgn0038206 FBgn0014141 FBgn0004657	0.00381	-2.6002	0.405	0.433	97435	1
GO:0060538	skeletal muscle organ development	BP	23	8	1.79851e-05	0.0116035	FBgn0259228 FBgn0004456 FBgn0033504 FBgn0013733 FBgn0014011 FBgn0260442 FBgn0004657 FBgn0028427	0.00042	-1.9354	0.601	0.783	16203	1
GO:0097435	supramolecular fiber organization	BP	73	16	1.13016e-06	0.00120524	FBgn0026084 FBgn0259228 FBgn0003447 FBgn0004456 FBgn0024238 FBgn0000256 FBgn0033504 FBgn0013733 FBgn0010397 FBgn0265991 FBgn0014011 FBgn0260442 FBgn0051363 FBgn0038206 FBgn0014141 FBgn0004657	0.00345	-2.9189	0.508	0	97435	0
GO:0005856	cytoskeleton	CC	132	20	2.11742e-05	0.0116035	FBgn0004397 FBgn0000042 FBgn0029903 FBgn0003447 FBgn0024238 FBgn0000256 FBgn0086347 FBgn0027066 FBgn0000253 FBgn0013733 FBgn0010397 FBgn0265991 FBgn0003888 FBgn0260442 FBgn0003886 FBgn0051363 FBgn0014141 FBgn0003890 FBgn0015589 FBgn0028427	NA	NA	NA	NA	NA	NA
GO:0044430	cytoskeletal part	CC	119	18	5.96293e-05	0.0283873	FBgn0000042 FBgn0029903 FBgn0003447 FBgn0024238 FBgn0000256 FBgn0086347 FBgn0027066 FBgn0000253 FBgn0013733 FBgn0010397 FBgn0265991 FBgn0003888 FBgn0003886 FBgn0051363 FBgn0014141 FBgn0003890 FBgn0015589 FBgn0028427	NA	NA	NA	NA	NA	NA
GO:0099080	supramolecular complex	CC	74	18	3.88708e-08	9.23051e-05	FBgn0000042 FBgn0029903 FBgn0003447 FBgn0024238 FBgn0000256 FBgn0027066 FBgn0013733 FBgn0033926 FBgn0010397 FBgn0265991 FBgn0003888 FBgn0003886 FBgn0051363 FBgn0014141 FBgn0003890 FBgn0014869 FBgn0086355 FBgn0004657	NA	NA	NA	NA	NA	NA
GO:0099081	supramolecular polymer	CC	72	18	2.43303e-08	8.66646e-05	FBgn0000042 FBgn0029903 FBgn0003447 FBgn0024238 FBgn0000256 FBgn0027066 FBgn0013733 FBgn0033926 FBgn0010397 FBgn0265991 FBgn0003888 FBgn0003886 FBgn0051363 FBgn0014141 FBgn0003890 FBgn0014869 FBgn0086355 FBgn0004657	NA	NA	NA	NA	NA	NA
GO:0099512	supramolecular fiber	CC	70	18	1.49531e-08	8.66646e-05	FBgn0000042 FBgn0029903 FBgn0003447 FBgn0024238 FBgn0000256 FBgn0027066 FBgn0013733 FBgn0033926 FBgn0010397 FBgn0265991 FBgn0003888 FBgn0003886 FBgn0051363 FBgn0014141 FBgn0003890 FBgn0014869 FBgn0086355 FBgn0004657	NA	NA	NA	NA	NA	NA
GO:0099513	polymeric cytoskeletal fiber	CC	44	13	3.11016e-07	0.000553919	FBgn0000042 FBgn0029903 FBgn0003447 FBgn0024238 FBgn0000256 FBgn0027066 FBgn0013733 FBgn0010397 FBgn0003888 FBgn0003886 FBgn0051363 FBgn0014141 FBgn0003890	NA	NA	NA	NA	NA	NA
GO:0015629	actin cytoskeleton	CC	41	11	7.76285e-06	0.00614473	FBgn0004397 FBgn0000042 FBgn0029903 FBgn0003447 FBgn0024238 FBgn0000256 FBgn0086347 FBgn0000253 FBgn0265991 FBgn0014141 FBgn0028427	NA	NA	NA	NA	NA	NA
GO:0005884	actin filament	CC	15	6	8.82405e-05	0.0330855	FBgn0000042 FBgn0029903 FBgn0003447 FBgn0024238 FBgn0000256 FBgn0014141	NA	NA	NA	NA	NA	NA
GO:0005200	structural constituent of cytoskeleton	MF	15	6	8.82405e-05	0.0330855	FBgn0000042 FBgn0003888 FBgn0260442 FBgn0003886 FBgn0051363 FBgn0003890	NA	NA	NA	NA	NA	NA
GO:0003779	actin binding	MF	54	11	0.000126587	0.0450903	FBgn0004397 FBgn0026084 FBgn0029903 FBgn0003447 FBgn0024238 FBgn0000256 FBgn0013733 FBgn0265991 FBgn0260442 FBgn0038206 FBgn0014141	NA	NA	NA	NA	NA	NA
GO enrichment for genes upregulated in PLASM1
	Term	Ont	N	DE	P.DE	ADJ	Genes	frequency	log10 p-value	uniqueness	dispensability	representative	eliminated
GO:0030198	extracellular matrix organization	BP	12	5	6.33453e-06	0.0056409	FBgn0261800 FBgn0011828 FBgn0267348 FBgn0026562 FBgn0003137	0.0006	-2.2487	0.008	0.329	30198	0
GO:0043062	extracellular structure organization	BP	21	7	4.2731e-07	0.00043488	FBgn0261800 FBgn0267727 FBgn0011828 FBgn0267348 FBgn0026562 FBgn0027598 FBgn0003137	0.00061	-3.3616	0.039	0	43062	0
GO:0070831	basement membrane assembly	BP	3	3	1.59755e-05	0.0126455	FBgn0261800 FBgn0267348 FBgn0026562	4e-05	-1.8981	0.004	0.848	30198	1
GO:0005576	extracellular region	CC	163	25	4.76181e-15	3.39231e-11	FBgn0041629 FBgn0030362 FBgn0016075 FBgn0000299 FBgn0261800 FBgn0001114 FBgn0028542 FBgn0013763 FBgn0026721 FBgn0034753 FBgn0011828 FBgn0002526 FBgn0267348 FBgn0045823 FBgn0029167 FBgn0250848 FBgn0004449 FBgn0265048 FBgn0026562 FBgn0003495 FBgn0027598 FBgn0003137 FBgn0029093 FBgn0010225 FBgn0040813	NA	NA	NA	NA	NA	NA
GO:0005615	extracellular space	CC	71	9	5.21514e-05	0.0371526	FBgn0041629 FBgn0030362 FBgn0013763 FBgn0034753 FBgn0011828 FBgn0250848 FBgn0265048 FBgn0026562 FBgn0040813	NA	NA	NA	NA	NA	NA
GO:0044421	extracellular region part	CC	111	19	3.77987e-12	1.34639e-08	FBgn0041629 FBgn0030362 FBgn0016075 FBgn0000299 FBgn0261800 FBgn0001114 FBgn0013763 FBgn0034753 FBgn0011828 FBgn0002526 FBgn0267348 FBgn0045823 FBgn0250848 FBgn0004449 FBgn0265048 FBgn0026562 FBgn0027598 FBgn0003137 FBgn0040813	NA	NA	NA	NA	NA	NA
GO:0031012	extracellular matrix	CC	32	10	2.10571e-09	2.50018e-06	FBgn0016075 FBgn0000299 FBgn0261800 FBgn0001114 FBgn0011828 FBgn0002526 FBgn0267348 FBgn0004449 FBgn0026562 FBgn0003137	NA	NA	NA	NA	NA	NA
GO:0005578	proteinaceous extracellular matrix	CC	21	10	1.421e-11	3.3744e-08	FBgn0016075 FBgn0000299 FBgn0261800 FBgn0001114 FBgn0011828 FBgn0002526 FBgn0267348 FBgn0004449 FBgn0026562 FBgn0003137	NA	NA	NA	NA	NA	NA
GO:0005604	basement membrane	CC	9	7	1.67504e-10	2.3866e-07	FBgn0016075 FBgn0000299 FBgn0261800 FBgn0001114 FBgn0002526 FBgn0267348 FBgn0003137	NA	NA	NA	NA	NA	NA
GO:0044420	extracellular matrix component	CC	9	7	1.67504e-10	2.3866e-07	FBgn0016075 FBgn0000299 FBgn0261800 FBgn0001114 FBgn0002526 FBgn0267348 FBgn0003137	NA	NA	NA	NA	NA	NA
GO:0005605	basal lamina	CC	4	3	6.2742e-05	0.040634	FBgn0261800 FBgn0002526 FBgn0267348	NA	NA	NA	NA	NA	NA
