# Supplementary material for: Constitutive activation of cellular immunity underlies the evolution of resistance to infection in Drosophila
Source: eLife. 2020 Dec 24;9:e59095. doi: 10.7554/eLife.59095 (PMC7785293; doi:10.7554/eLife.59095)
Supplement: Figure 5—figure supplement 4—source data 1. [file elife-59095-fig5-figsupp4-data1.xlsx]

## Sheet: Figure 5— FS 4 - Raw data
Figure 5 - figure supplement 4 - Time course of hemocyte counts with and without infection
Sample	Chamber_no	Line	Selection_Regime	Treatment	Time_Point	Generation	Cross	Plasmatocytes	Lamellocytes	THC	Lamellocyte_Proportion
1	1	C1	No Parasitism	No Infection	24h	43	1	64	0	64	0
2	2	C1	No Parasitism	No Infection	24h	43	1	104	0	104	0
3	3	C2	No Parasitism	No Infection	24h	43	1	39	0	39	0
4	4	C2	No Parasitism	No Infection	24h	43	1	56	0	56	0
5	5	C3	No Parasitism	No Infection	24h	43	1	22	0	22	0
6	6	C3	No Parasitism	No Infection	24h	43	1	50	0	50	0
7	7	NSRef-1	High Parasitism	No Infection	24h	43	1	104	5	109	0.0458716
8	8	NSRef-1	High Parasitism	No Infection	24h	43	1	53	4	57	0.0701754
9	9	NSRef-2	High Parasitism	No Infection	24h	43	1	84	7	91	0.0769231
10	10	NSRef-2	High Parasitism	No Infection	24h	43	1	86	2	88	0.0227273
11	11	NSRef-3	High Parasitism	No Infection	24h	43	1	114	1	115	0.00869565
12	12	NSRef-3	High Parasitism	No Infection	24h	43	1	88	1	89	0.011236
13	1	C1	No Parasitism	Infection	24h	43	1	131	40	171	0.233918
14	2	C1	No Parasitism	Infection	24h	43	1	107	27	134	0.201493
15	3	C2	No Parasitism	Infection	24h	43	1	77	28	105	0.266667
16	4	C2	No Parasitism	Infection	24h	43	1	114	11	125	0.088
17	5	C3	No Parasitism	Infection	24h	43	1	121	30	151	0.198675
18	6	C3	No Parasitism	Infection	24h	43	1	86	31	117	0.264957
19	7	NSRef-1	High Parasitism	Infection	24h	43	1	239	86	325	0.264615
20	8	NSRef-1	High Parasitism	Infection	24h	43	1	247	35	282	0.124113
21	9	NSRef-2	High Parasitism	Infection	24h	43	1	269	122	391	0.31202
22	10	NSRef-2	High Parasitism	Infection	24h	43	1	248	94	342	0.274854
23	11	NSRef-3	High Parasitism	Infection	24h	43	1	204	76	280	0.271429
24	12	NSRef-3	High Parasitism	Infection	24h	43	1	239	100	339	0.294985
25	1	C1	No Parasitism	No Infection	24h	43	1	86	2	88	0.0227273
26	2	C2	No Parasitism	No Infection	24h	43	1	39	0	39	0
27	3	C3	No Parasitism	No Infection	24h	43	1	30	0	30	0
28	4	NSRef-1	High Parasitism	No Infection	24h	43	1	111	5	116	0.0431034
29	5	NSRef-2	High Parasitism	No Infection	24h	43	1	138	16	154	0.103896
30	6	NSRef-3	High Parasitism	No Infection	24h	43	1	82	0	82	0
31	7	C1	No Parasitism	Infection	24h	43	1	150	33	183	0.180328
32	8	C2	No Parasitism	Infection	24h	43	1	158	21	179	0.117318
33	9	C3	No Parasitism	Infection	24h	43	1	56	14	70	0.2
34	10	NSRef-1	High Parasitism	Infection	24h	43	1	143	20	163	0.122699
35	11	NSRef-2	High Parasitism	Infection	24h	43	1	194	54	248	0.217742
36	12	NSRef-3	High Parasitism	Infection	24h	43	1	226	35	261	0.1341
1	1	C1	No Parasitism	No Infection	48h	43	1	62	1	63	0.015873
2	2	C1	No Parasitism	No Infection	48h	43	1	59	1	60	0.0166667
3	3	C2	No Parasitism	No Infection	48h	43	1	33	2	35	0.0571429
4	4	C2	No Parasitism	No Infection	48h	43	1	42	0	42	0
5	5	C3	No Parasitism	No Infection	48h	43	1	20	2	22	0.0909091
6	6	C3	No Parasitism	No Infection	48h	43	1	139	0	139	0
7	7	NSRef-1	High Parasitism	No Infection	48h	43	1	174	11	185	0.0594595
8	8	NSRef-1	High Parasitism	No Infection	48h	43	1	283	3	286	0.0104895
9	9	NSRef-2	High Parasitism	No Infection	48h	43	1	265	38	303	0.125413
10	10	NSRef-2	High Parasitism	No Infection	48h	43	1	210	10	220	0.0454545
11	11	NSRef-3	High Parasitism	No Infection	48h	43	1	287	13	300	0.0433333
12	12	NSRef-3	High Parasitism	No Infection	48h	43	1	242	5	247	0.0202429
13	1	C1	No Parasitism	Infection	48h	43	1	101	53	154	0.344156
14	2	C1	No Parasitism	Infection	48h	43	1	109	49	158	0.310127
15	3	C2	No Parasitism	Infection	48h	43	1	239	52	291	0.178694
16	4	C2	No Parasitism	Infection	48h	43	1	71	57	128	0.445312
17	5	C3	No Parasitism	Infection	48h	43	1	85	53	138	0.384058
18	6	C3	No Parasitism	Infection	48h	43	1	121	12	133	0.0902256
19	7	NSRef-1	High Parasitism	Infection	48h	43	1	445	35	480	0.0729167
20	8	NSRef-1	High Parasitism	Infection	48h	43	1	198	26	224	0.116071
21	9	NSRef-2	High Parasitism	Infection	48h	43	1	353	70	423	0.165485
22	10	NSRef-2	High Parasitism	Infection	48h	43	1	226	82	308	0.266234
23	11	NSRef-3	High Parasitism	Infection	48h	43	1	638	137	775	0.176774
24	12	NSRef-3	High Parasitism	Infection	48h	43	1	402	201	603	0.333333
25	1	C1	No Parasitism	No Infection	48h	43	1	248	1	249	0.00401606
26	2	C2	No Parasitism	No Infection	48h	43	1	107	0	107	0
27	3	C3	No Parasitism	No Infection	48h	43	1	87	2	89	0.0224719
28	4	NSRef-1	High Parasitism	No Infection	48h	43	1	219	5	224	0.0223214
29	5	NSRef-2	High Parasitism	No Infection	48h	43	1	237	1	238	0.00420168
30	6	NSRef-3	High Parasitism	No Infection	48h	43	1	263	8	271	0.0295203
31	7	C1	No Parasitism	Infection	48h	43	1	275	53	328	0.161585
32	8	C2	No Parasitism	Infection	48h	43	1	180	33	213	0.15493
33	9	C3	No Parasitism	Infection	48h	43	1	134	18	152	0.118421
34	10	NSRef-1	High Parasitism	Infection	48h	43	1	245	33	278	0.118705
35	11	NSRef-2	High Parasitism	Infection	48h	43	1	271	73	344	0.212209
36	12	NSRef-3	High Parasitism	Infection	48h	43	1	419	29	448	0.0647321
1	1	C1	No Parasitism	No Infection	24h	43	2	82	0	82	0
2	2	C1	No Parasitism	No Infection	24h	43	2	53	0	53	0
3	3	C2	No Parasitism	No Infection	24h	43	2	49	0	49	0
4	4	C2	No Parasitism	No Infection	24h	43	2	92	0	92	0
5	5	C3	No Parasitism	No Infection	24h	43	2	13	0	13	0
6	6	C3	No Parasitism	No Infection	24h	43	2	29	0	29	0
7	7	NSRef-1	High Parasitism	No Infection	24h	43	2	130	21	151	0.139073
8	8	NSRef-1	High Parasitism	No Infection	24h	43	2	131	34	165	0.206061
9	9	NSRef-2	High Parasitism	No Infection	24h	43	2	103	0	103	0
10	10	NSRef-2	High Parasitism	No Infection	24h	43	2	94	2	96	0.0208333
11	11	NSRef-3	High Parasitism	No Infection	24h	43	2	58	4	62	0.0645161
12	12	NSRef-3	High Parasitism	No Infection	24h	43	2	110	6	116	0.0517241
13	1	C1	No Parasitism	Infection	24h	43	2	116	1	117	0.00854701
14	2	C1	No Parasitism	Infection	24h	43	2	92	17	109	0.155963
15	3	C2	No Parasitism	Infection	24h	43	2	108	12	120	0.1
16	4	C2	No Parasitism	Infection	24h	43	2	80	7	87	0.0804598
17	5	C3	No Parasitism	Infection	24h	43	2	95	7	102	0.0686275
18	6	C3	No Parasitism	Infection	24h	43	2	56	13	69	0.188406
19	7	NSRef-1	High Parasitism	Infection	24h	43	2	200	47	247	0.190283
20	8	NSRef-1	High Parasitism	Infection	24h	43	2	246	39	285	0.136842
21	9	NSRef-2	High Parasitism	Infection	24h	43	2	114	106	220	0.481818
22	10	NSRef-2	High Parasitism	Infection	24h	43	2	197	39	236	0.165254
23	11	NSRef-3	High Parasitism	Infection	24h	43	2	168	93	261	0.356322
24	12	NSRef-3	High Parasitism	Infection	24h	43	2	202	79	281	0.281139
25	1	C1	No Parasitism	No Infection	24h	43	2	73	3	76	0.0394737
26	2	C2	No Parasitism	No Infection	24h	43	2	90	0	90	0
27	3	C3	No Parasitism	No Infection	24h	43	2	31	0	31	0
28	4	NSRef-1	High Parasitism	No Infection	24h	43	2	102	8	110	0.0727273
29	5	NSRef-2	High Parasitism	No Infection	24h	43	2	67	2	69	0.0289855
30	6	NSRef-3	High Parasitism	No Infection	24h	43	2	71	12	83	0.144578
31	7	C1	No Parasitism	Infection	24h	43	2	132	19	151	0.125828
32	8	C2	No Parasitism	Infection	24h	43	2	141	13	154	0.0844156
33	9	C3	No Parasitism	Infection	24h	43	2	76	5	81	0.0617284
34	10	NSRef-1	High Parasitism	Infection	24h	43	2	187	30	217	0.138249
35	11	NSRef-2	High Parasitism	Infection	24h	43	2	391	73	464	0.157328
36	12	NSRef-3	High Parasitism	Infection	24h	43	2	270	64	334	0.191617
1	1	C1	No Parasitism	No Infection	48h	43	2	53	0	53	0
2	2	C1	No Parasitism	No Infection	48h	43	2	95	0	95	0
3	3	C2	No Parasitism	No Infection	48h	43	2	95	0	95	0
4	4	C2	No Parasitism	No Infection	48h	43	2	178	4	182	0.021978
5	5	C3	No Parasitism	No Infection	48h	43	2	33	2	35	0.0571429
6	6	C3	No Parasitism	No Infection	48h	43	2	56	0	56	0
7	7	NSRef-1	High Parasitism	No Infection	48h	43	2	148	0	148	0
8	8	NSRef-1	High Parasitism	No Infection	48h	43	2	134	2	136	0.0147059
9	9	NSRef-2	High Parasitism	No Infection	48h	43	2	134	14	148	0.0945946
10	10	NSRef-2	High Parasitism	No Infection	48h	43	2	193	10	203	0.0492611
11	11	NSRef-3	High Parasitism	No Infection	48h	43	2	215	14	229	0.0611354
12	12	NSRef-3	High Parasitism	No Infection	48h	43	2	321	3	324	0.00925926
13	1	C1	No Parasitism	Infection	48h	43	2	103	49	152	0.322368
14	2	C1	No Parasitism	Infection	48h	43	2	181	55	236	0.233051
15	3	C2	No Parasitism	Infection	48h	43	2	141	76	217	0.35023
16	4	C2	No Parasitism	Infection	48h	43	2	187	19	206	0.092233
17	5	C3	No Parasitism	Infection	48h	43	2	156	50	206	0.242718
18	6	C3	No Parasitism	Infection	48h	43	2	114	5	119	0.0420168
19	7	NSRef-1	High Parasitism	Infection	48h	43	2	242	38	280	0.135714
20	8	NSRef-1	High Parasitism	Infection	48h	43	2	249	84	333	0.252252
21	9	NSRef-2	High Parasitism	Infection	48h	43	2	218	53	271	0.195572
22	10	NSRef-2	High Parasitism	Infection	48h	43	2	255	64	319	0.200627
23	11	NSRef-3	High Parasitism	Infection	48h	43	2	204	23	227	0.101322
24	12	NSRef-3	High Parasitism	Infection	48h	43	2	284	52	336	0.154762
25	1	C1	No Parasitism	No Infection	48h	43	2	150	0	150	0
26	2	C2	No Parasitism	No Infection	48h	43	2	92	4	96	0.0416667
27	3	C3	No Parasitism	No Infection	48h	43	2	105	1	106	0.00943396
28	4	NSRef-1	High Parasitism	No Infection	48h	43	2	209	8	217	0.0368664
29	5	NSRef-2	High Parasitism	No Infection	48h	43	2	200	29	229	0.126638
30	6	NSRef-3	High Parasitism	No Infection	48h	43	2	210	9	219	0.0410959
31	7	C1	No Parasitism	Infection	48h	43	2	208	56	264	0.212121
32	8	C2	No Parasitism	Infection	48h	43	2	195	53	248	0.21371
33	9	C3	No Parasitism	Infection	48h	43	2	242	29	271	0.107011
34	10	NSRef-1	High Parasitism	Infection	48h	43	2	347	23	370	0.0621622
35	11	NSRef-2	High Parasitism	Infection	48h	43	2	367	124	491	0.252546
36	12	NSRef-3	High Parasitism	Infection	48h	43	2	421	66	487	0.135524
1	1	C1	No Parasitism	No Infection	12h	44	1	23	0	23	0
2	2	C1	No Parasitism	No Infection	12h	44	1	50	0	50	0
3	3	C2	No Parasitism	No Infection	12h	44	1	25	0	25	0
4	4	C2	No Parasitism	No Infection	12h	44	1	42	0	42	0
5	5	C3	No Parasitism	No Infection	12h	44	1	29	0	29	0
6	6	C3	No Parasitism	No Infection	12h	44	1	40	0	40	0
7	7	NSRef-1	High Parasitism	No Infection	12h	44	1	82	0	82	0
8	8	NSRef-1	High Parasitism	No Infection	12h	44	1	73	0	73	0
9	9	NSRef-2	High Parasitism	No Infection	12h	44	1	59	0	59	0
10	10	NSRef-2	High Parasitism	No Infection	12h	44	1	73	0	73	0
11	11	NSRef-3	High Parasitism	No Infection	12h	44	1	63	1	64	0.015625
12	12	NSRef-3	High Parasitism	No Infection	12h	44	1	59	0	59	0
13	1	C1	No Parasitism	Infection	12h	44	1	154	0	154	0
14	2	C1	No Parasitism	Infection	12h	44	1	118	0	118	0
15	3	C2	No Parasitism	Infection	12h	44	1	103	0	103	0
16	4	C2	No Parasitism	Infection	12h	44	1	65	0	65	0
17	5	C3	No Parasitism	Infection	12h	44	1	160	1	161	0.00621118
18	6	C3	No Parasitism	Infection	12h	44	1	89	0	89	0
19	7	NSRef-1	High Parasitism	Infection	12h	44	1	303	2	305	0.00655738
20	8	NSRef-1	High Parasitism	Infection	12h	44	1	279	18	297	0.0606061
21	9	NSRef-2	High Parasitism	Infection	12h	44	1	174	1	175	0.00571429
22	10	NSRef-2	High Parasitism	Infection	12h	44	1	292	12	304	0.0394737
23	11	NSRef-3	High Parasitism	Infection	12h	44	1	319	10	329	0.0303951
24	12	NSRef-3	High Parasitism	Infection	12h	44	1	212	7	219	0.0319635
25	1	C1	No Parasitism	No Infection	12h	44	1	70	0	70	0
26	2	C2	No Parasitism	No Infection	12h	44	1	25	0	25	0
27	3	C3	No Parasitism	No Infection	12h	44	1	41	0	41	0
28	4	NSRef-1	High Parasitism	No Infection	12h	44	1	33	0	33	0
29	5	NSRef-2	High Parasitism	No Infection	12h	44	1	85	0	85	0
30	6	NSRef-3	High Parasitism	No Infection	12h	44	1	81	0	81	0
31	7	C1	No Parasitism	Infection	12h	44	1	173	20	193	0.103627
32	8	C2	No Parasitism	Infection	12h	44	1	40	1	41	0.0243902
33	9	C3	No Parasitism	Infection	12h	44	1	107	1	108	0.00925926
34	10	NSRef-1	High Parasitism	Infection	12h	44	1	325	33	358	0.0921788
35	11	NSRef-2	High Parasitism	Infection	12h	44	1	306	40	346	0.115607
36	12	NSRef-3	High Parasitism	Infection	12h	44	1	304	52	356	0.146067
1	1	C1	No Parasitism	No Infection	36h	44	1	51	0	51	0
2	2	C1	No Parasitism	No Infection	36h	44	1	48	8	56	0.142857
3	3	C2	No Parasitism	No Infection	36h	44	1	57	0	57	0
4	4	C2	No Parasitism	No Infection	36h	44	1	50	0	50	0
5	5	C3	No Parasitism	No Infection	36h	44	1	17	0	17	0
6	6	C3	No Parasitism	No Infection	36h	44	1	40	0	40	0
7	7	NSRef-1	High Parasitism	No Infection	36h	44	1	77	2	79	0.0253165
8	8	NSRef-1	High Parasitism	No Infection	36h	44	1	95	1	96	0.0104167
9	9	NSRef-2	High Parasitism	No Infection	36h	44	1	136	3	139	0.0215827
10	10	NSRef-2	High Parasitism	No Infection	36h	44	1	149	7	156	0.0448718
11	11	NSRef-3	High Parasitism	No Infection	36h	44	1	50	0	50	0
12	12	NSRef-3	High Parasitism	No Infection	36h	44	1	121	13	134	0.0970149
13	1	C1	No Parasitism	Infection	36h	44	1	111	19	130	0.146154
14	2	C1	No Parasitism	Infection	36h	44	1	212	14	226	0.0619469
15	3	C2	No Parasitism	Infection	36h	44	1	89	2	91	0.021978
16	4	C2	No Parasitism	Infection	36h	44	1	91	0	91	0
17	5	C3	No Parasitism	Infection	36h	44	1	169	4	173	0.0231214
18	6	C3	No Parasitism	Infection	36h	44	1	86	11	97	0.113402
19	7	NSRef-1	High Parasitism	Infection	36h	44	1	153	33	186	0.177419
20	8	NSRef-1	High Parasitism	Infection	36h	44	1	166	50	216	0.231481
21	9	NSRef-2	High Parasitism	Infection	36h	44	1	189	30	219	0.136986
22	10	NSRef-2	High Parasitism	Infection	36h	44	1	138	23	161	0.142857
23	11	NSRef-3	High Parasitism	Infection	36h	44	1	180	37	217	0.170507
24	12	NSRef-3	High Parasitism	Infection	36h	44	1	149	54	203	0.26601
25	1	C1	No Parasitism	No Infection	36h	44	1	69	0	69	0
26	2	C2	No Parasitism	No Infection	36h	44	1	29	0	29	0
27	3	C3	No Parasitism	No Infection	36h	44	1	21	0	21	0
28	4	NSRef-1	High Parasitism	No Infection	36h	44	1	82	2	84	0.0238095
29	5	NSRef-2	High Parasitism	No Infection	36h	44	1	56	0	56	0
30	6	NSRef-3	High Parasitism	No Infection	36h	44	1	98	4	102	0.0392157
31	7	C1	No Parasitism	Infection	36h	44	1	179	3	182	0.0164835
32	8	C2	No Parasitism	Infection	36h	44	1	158	3	161	0.0186335
33	9	C3	No Parasitism	Infection	36h	44	1	128	12	140	0.0857143
34	10	NSRef-1	High Parasitism	Infection	36h	44	1	177	24	201	0.119403
35	11	NSRef-2	High Parasitism	Infection	36h	44	1	219	76	295	0.257627
36	12	NSRef-3	High Parasitism	Infection	36h	44	1	147	45	192	0.234375
1	1	C1	No Parasitism	No Infection	12h	44	2	82	2	84	0.0238095
2	2	C1	No Parasitism	No Infection	12h	44	2	38	0	38	0
3	3	C2	No Parasitism	No Infection	12h	44	2	74	0	74	0
4	4	C2	No Parasitism	No Infection	12h	44	2	32	0	32	0
5	5	C3	No Parasitism	No Infection	12h	44	2	48	0	48	0
6	6	C3	No Parasitism	No Infection	12h	44	2	75	0	75	0
7	7	NSRef-1	High Parasitism	No Infection	12h	44	2	54	0	54	0
8	8	NSRef-1	High Parasitism	No Infection	12h	44	2	30	0	30	0
9	9	NSRef-2	High Parasitism	No Infection	12h	44	2	67	16	83	0.192771
10	10	NSRef-2	High Parasitism	No Infection	12h	44	2	115	4	119	0.0336134
11	11	NSRef-3	High Parasitism	No Infection	12h	44	2	67	1	68	0.0147059
12	12	NSRef-3	High Parasitism	No Infection	12h	44	2	94	2	96	0.0208333
13	1	C1	No Parasitism	Infection	12h	44	2	125	2	127	0.015748
14	2	C1	No Parasitism	Infection	12h	44	2	107	2	109	0.0183486
15	3	C2	No Parasitism	Infection	12h	44	2	92	5	97	0.0515464
16	4	C2	No Parasitism	Infection	12h	44	2	41	1	42	0.0238095
17	5	C3	No Parasitism	Infection	12h	44	2	98	1	99	0.010101
18	6	C3	No Parasitism	Infection	12h	44	2	68	0	68	0
19	7	NSRef-1	High Parasitism	Infection	12h	44	2	149	4	153	0.0261438
20	8	NSRef-1	High Parasitism	Infection	12h	44	2	197	15	212	0.0707547
21	9	NSRef-2	High Parasitism	Infection	12h	44	2	191	14	205	0.0682927
22	10	NSRef-2	High Parasitism	Infection	12h	44	2	201	12	213	0.056338
23	11	NSRef-3	High Parasitism	Infection	12h	44	2	179	9	188	0.0478723
24	12	NSRef-3	High Parasitism	Infection	12h	44	2	146	9	155	0.0580645
25	1	C1	No Parasitism	No Infection	12h	44	2	56	0	56	0
26	2	C2	No Parasitism	No Infection	12h	44	2	22	0	22	0
27	3	C3	No Parasitism	No Infection	12h	44	2	32	0	32	0
28	4	NSRef-1	High Parasitism	No Infection	12h	44	2	67	0	67	0
29	5	NSRef-2	High Parasitism	No Infection	12h	44	2	99	10	109	0.0917431
30	6	NSRef-3	High Parasitism	No Infection	12h	44	2	19	5	24	0.208333
31	7	C1	No Parasitism	Infection	12h	44	2	82	2	84	0.0238095
32	8	C2	No Parasitism	Infection	12h	44	2	62	3	65	0.0461538
33	9	C3	No Parasitism	Infection	12h	44	2	69	0	69	0
34	10	NSRef-1	High Parasitism	Infection	12h	44	2	244	8	252	0.031746
35	11	NSRef-2	High Parasitism	Infection	12h	44	2	291	23	314	0.0732484
36	12	NSRef-3	High Parasitism	Infection	12h	44	2	248	46	294	0.156463
1	1	C1	No Parasitism	No Infection	36h	44	2	38	2	40	0.05
2	2	C1	No Parasitism	No Infection	36h	44	2	49	0	49	0
3	3	C2	No Parasitism	No Infection	36h	44	2	28	0	28	0
4	4	C2	No Parasitism	No Infection	36h	44	2	24	0	24	0
5	5	C3	No Parasitism	No Infection	36h	44	2	24	0	24	0
6	6	C3	No Parasitism	No Infection	36h	44	2	18	0	18	0
7	7	NSRef-1	High Parasitism	No Infection	36h	44	2	40	0	40	0
8	8	NSRef-1	High Parasitism	No Infection	36h	44	2	58	0	58	0
9	9	NSRef-2	High Parasitism	No Infection	36h	44	2	84	0	84	0
10	10	NSRef-2	High Parasitism	No Infection	36h	44	2	103	21	124	0.169355
11	11	NSRef-3	High Parasitism	No Infection	36h	44	2	57	7	64	0.109375
12	12	NSRef-3	High Parasitism	No Infection	36h	44	2	73	24	97	0.247423
13	1	C1	No Parasitism	Infection	36h	44	2	122	5	127	0.0393701
14	2	C1	No Parasitism	Infection	36h	44	2	93	6	99	0.0606061
15	3	C2	No Parasitism	Infection	36h	44	2	33	1	34	0.0294118
16	4	C2	No Parasitism	Infection	36h	44	2	89	5	94	0.0531915
17	5	C3	No Parasitism	Infection	36h	44	2	58	8	66	0.121212
18	6	C3	No Parasitism	Infection	36h	44	2	82	11	93	0.11828
19	7	NSRef-1	High Parasitism	Infection	36h	44	2	162	47	209	0.22488
20	8	NSRef-1	High Parasitism	Infection	36h	44	2	152	13	165	0.0787879
21	9	NSRef-2	High Parasitism	Infection	36h	44	2	109	34	143	0.237762
22	10	NSRef-2	High Parasitism	Infection	36h	44	2	244	25	269	0.0929368
23	11	NSRef-3	High Parasitism	Infection	36h	44	2	139	35	174	0.201149
24	12	NSRef-3	High Parasitism	Infection	36h	44	2	99	19	118	0.161017
25	1	C1	No Parasitism	No Infection	36h	44	2	30	0	30	0
26	2	C2	No Parasitism	No Infection	36h	44	2	21	1	22	0.0454545
27	3	C3	No Parasitism	No Infection	36h	44	2	22	0	22	0
28	4	NSRef-1	High Parasitism	No Infection	36h	44	2	93	17	110	0.154545
29	5	NSRef-2	High Parasitism	No Infection	36h	44	2	106	5	111	0.045045
30	6	NSRef-3	High Parasitism	No Infection	36h	44	2	36	2	38	0.0526316
31	7	C1	No Parasitism	Infection	36h	44	2	75	5	80	0.0625
32	8	C2	No Parasitism	Infection	36h	44	2	120	5	125	0.04
33	9	C3	No Parasitism	Infection	36h	44	2	27	0	27	0
34	10	NSRef-1	High Parasitism	Infection	36h	44	2	173	37	210	0.17619
35	11	NSRef-2	High Parasitism	Infection	36h	44	2	226	44	270	0.162963
36	12	NSRef-3	High Parasitism	Infection	36h	44	2	233	25	258	0.0968992

## Sheet: Figure 5— FS 4 -R script
library(ggplot2)
library(plyr)
#set wd
setwd(dirname(rstudioapi::getActiveDocumentContext()$path))
list.files()
data = read.table("Figure 5— FS 4 - Raw data.csv", sep = ",", dec = ".", header = TRUE)
head(data)
str(data)
data$Treatment = factor(data$Treatment, levels=c('No Infection','Infection'))
data$Selection_Regime = factor(data$Selection_Regime, levels=c('No Parasitism','High Parasitism'))
data$Generation = as.factor(data$Generation)
data$Cross = as.factor(data$Cross)
#Create column ID that concatenates tratment and selection regime
data$ID = as.factor(paste(data$Selection_Regime, data$Treatment, sep=', '))
data$ID = factor(data$ID, levels=c('No Parasitism, No Infection','High Parasitism, No Infection',
'No Parasitism, Infection', 'High Parasitism, Infection'))
data_summary = ddply(data,.(Line, Selection_Regime, ID, Treatment, Time_Point),summarise,
mean_THC = mean(THC, na.rm = T),
mean_Plasmatocytes = mean(Plasmatocytes, na.rm=T),
mean_Lamellocytes = mean(Lamellocytes, na.rm=T),
mean_Lamellocyte_Proportion = mean(Lamellocyte_Proportion, na.rm=T))
data_summary_2 = ddply(data_summary,.(Selection_Regime, Treatment, ID, Time_Point),summarise,
mean_THC = mean(mean_THC, na.rm=T),
mean_Plasmatocytes = mean(mean_Plasmatocytes, na.rm=T),
mean_Lamellocytes = mean(mean_Lamellocytes, na.rm=T),
mean_Lamellocyte_Proportion = mean(mean_Lamellocyte_Proportion, na.rm=T))
##################################
##Plot data
##################################
color_vector = c('#0072b2','#d55e00')
p_THC_lines = ggplot(data_summary_2, aes(x=Time_Point, y=mean_THC))+
geom_point(aes(group=ID, color=Selection_Regime, alpha=Treatment), size=2.5)+
geom_path(aes(group=ID, color=Selection_Regime, alpha=Treatment), size=1.5)+
scale_color_manual(name='Selection regime', values = color_vector)+
scale_alpha_manual(values = c(.5,1))+
scale_size_manual(values=c(.75,1.5))+
guides(linetype = guide_legend(override.aes = list(fill = NA)))+
theme_bw()+
xlab(expression('Hours post infection'))+
ylab(expression(paste('Total hemocytes (x50/',mu*L,')')))+
scale_y_continuous(expand = c(0, 0), limits=c(0, max(data_summary$mean_THC+20)))+
theme(panel.grid = element_blank(),
axis.title.x = element_text(colour = "grey30", face='bold',size=15),
axis.text.x = element_text(angle = 0, color='grey30',size=15),
axis.title.y = element_text(colour = "grey30", face='bold',size=15),
axis.text.y = element_text(size=15),
panel.border = element_blank(),
axis.line = element_line(colour = "grey30"),
legend.box = "horizontal",
legend.title=element_text(size=10),
legend.text=element_text(size=10),
legend.key.size = unit(.3, "cm"),
legend.margin = margin(0,0,0,0, unit="cm"),
legend.position = 'none')
p_THC_lines
pdf(file="THC_Time_Course.pdf",,height=3,width=5)
p_THC_lines
dev.off()
p_plasmatocytes_lines = ggplot(data_summary_2, aes(x=Time_Point, y=mean_Plasmatocytes))+
geom_point(aes(group=ID, color=Selection_Regime, alpha=Treatment), size=2.5)+
geom_path(aes(group=ID, color=Selection_Regime, alpha=Treatment), size=1.5)+
scale_color_manual(name='Selection regime', values = color_vector)+
scale_alpha_manual(values = c(.5,1))+
scale_size_manual(values=c(.75,1.5))+
guides(linetype = guide_legend(override.aes = list(fill = NA)))+
theme_bw()+
xlab(expression('Hours post infection'))+
ylab(expression(paste('Plasmatocytes (x50/',mu*L,')')))+
scale_y_continuous(expand = c(0, 0), limits=c(0, max(data_summary$mean_THC+20)))+
theme(panel.grid = element_blank(),
axis.title.x = element_text(colour = "grey30", face='bold',size=15),
axis.text.x = element_text(angle = 0, color='grey30',size=15),
axis.title.y = element_text(colour = "grey30", face='bold',size=15),
axis.text.y = element_text(size=15),
panel.border = element_blank(),
axis.line = element_line(colour = "grey30"),
legend.box = "horizontal",
legend.title=element_text(size=10),
legend.text=element_text(size=10),
legend.key.size = unit(.5, "cm"),
legend.margin = margin(0,0,0,0, unit="cm"),
legend.position = 'none')
p_plasmatocytes_lines
pdf(file="Plasmatocytes_Time_Course.pdf",height=3,width=5)
p_plasmatocytes_lines
dev.off()
p_lamellocytes_lines = ggplot(data_summary_2, aes(x=Time_Point, y=mean_Lamellocytes))+
geom_point(aes(group=ID, color=Selection_Regime, alpha=Treatment), size=2.5)+
geom_path(aes(group=ID, color=Selection_Regime, alpha=Treatment), size=1.5)+
scale_color_manual(name='Selection regime', values = color_vector)+
scale_alpha_manual(values = c(.5,1))+
scale_size_manual(values=c(.75,1.5))+
guides(linetype = guide_legend(override.aes = list(fill = NA)))+
theme_bw()+
xlab(expression('Hours post infection'))+
ylab(expression(paste('Lamellocytes (x50/',mu*L,')')))+
scale_y_continuous(expand = c(0, 0))+
theme(panel.grid = element_blank(),
axis.title.x = element_text(colour = "grey30", face='bold',size=15),
axis.text.x = element_text(angle = 0, color='grey30',size=15),
axis.title.y = element_text(colour = "grey30", face='bold',size=15),
axis.text.y = element_text(size=15),
panel.border = element_blank(),
axis.line = element_line(colour = "grey30"),
legend.box = "horizontal",
legend.title=element_text(size=10),
legend.text=element_text(size=10),
legend.key.size = unit(.5, "cm"),
legend.margin = margin(0,0,0,0, unit="cm"),
legend.position = 'none')
p_lamellocytes_lines
pdf(file="Lamellocytes_Time_Course.pdf",height=3,width=5)
p_lamellocytes_lines
dev.off()
p_lamellocyte_proportion_lines = ggplot(data_summary_2, aes(x=Time_Point, y=mean_Lamellocyte_Proportion))+
geom_point(aes(group=ID, color=Selection_Regime, alpha=Treatment), size=2.5)+
geom_path(aes(group=ID, color=Selection_Regime, alpha=Treatment), size=1.5)+
scale_color_manual(name='Selection regime', values = color_vector)+
scale_alpha_manual(values = c(.5,1))+
scale_size_manual(values=c(.75,1.5))+
guides(linetype = guide_legend(override.aes = list(fill = NA)))+
theme_bw()+
xlab(expression('Hours post infection'))+
ylab(expression('Lamellocyte proportion'))+
scale_y_continuous(expand = c(0, 0), limits=c(0,.4))+
theme(panel.grid = element_blank(),
axis.title.x = element_text(colour = "grey30", face='bold',size=15),
axis.text.x = element_text(angle = 0, color='grey30',size=15),
axis.title.y = element_text(colour = "grey30", face='bold',size=15),
axis.text.y = element_text(size=15),
panel.border = element_blank(),
axis.line = element_line(colour = "grey30"),
legend.box = "horizontal",
legend.title=element_text(size=10),
legend.text=element_text(size=10),
legend.key.size = unit(.5, "cm"),
legend.margin = margin(0,0,0,0, unit="cm"),
legend.position = 'none')
p_lamellocyte_proportion_lines
pdf(file="Lamellocyte_Proportion_Time_Course.pdf",height=3,width=5)
p_lamellocyte_proportion_lines
dev.off()
##############################
####Stats
##############################
library(car)
library(lme4)
##THC using means per Line/Treatment. Line and Cross as random effect
##Lamellocyte proportion. Proportions are arcsin transformed
asinTransform <- function(p) { asin(sqrt(p)) }
data$Lamellocyte_Proportion_Transformed = asinTransform(data$Lamellocyte_Proportion)
data_summary = ddply(data,.(Line, Selection_Regime, ID, Treatment, Time_Point, Cross),summarise,
mean_THC = mean(THC, na.rm = T),
mean_Plasmatocytes = mean(Plasmatocytes, na.rm=T),
mean_Lamellocytes = mean(Lamellocytes, na.rm=T),
mean_Lamellocyte_Proportion_Transformed = mean(Lamellocyte_Proportion_Transformed, na.rm=T))
##THC
m_THC_NoInfection = lmer( mean_THC ~ Selection_Regime*Time_Point + (1|Line) + (1|Cross),
data=data_summary, subset = (Treatment=='No Infection'))
Anova(m_THC_NoInfection)
m_THC_Infection = lmer( mean_THC ~ Selection_Regime*Time_Point + (1|Line)+ (1|Cross),
data=data_summary, subset = (Treatment=='Infection'))
Anova(m_THC_Infection)
##Lamellocytes
m_Lamellocytes_NoInfection = lmer(mean_Lamellocytes ~ Selection_Regime*Time_Point + (1|Line) + (1|Cross),
data=data_summary, subset = (Treatment=='No Infection'))
Anova(m_Lamellocytes_NoInfection)
m_Lamellocytes_Infection = lmer(mean_Lamellocytes ~ Selection_Regime*Time_Point + (1|Line)+ (1|Cross),
data=data_summary, subset = (Treatment=='Infection'))
Anova(m_Lamellocytes_Infection)
##Lamellocyte proportion
m_Lamellocyte_Proportion_NoInfection = lmer( mean_Lamellocyte_Proportion_Transformed ~ Selection_Regime*Time_Point + (1|Line) + (1|Cross),
data=data_summary, subset = (Treatment=='No Infection'))
Anova(m_Lamellocyte_Proportion_NoInfection)
m_Lamellocyte_Proportion_Infection = lmer( mean_Lamellocyte_Proportion_Transformed ~ Selection_Regime*Time_Point + (1|Line)+ (1|Cross),
data=data_summary, subset = (Treatment=='Infection'))
Anova(m_Lamellocyte_Proportion_Infection,type="III")
