# Supplementary material for: Constitutive activation of cellular immunity underlies the evolution of resistance to infection in Drosophila
Source: eLife. 2020 Dec 24;9:e59095. doi: 10.7554/eLife.59095 (PMC7785293; doi:10.7554/eLife.59095)
Supplement: Figure 5—figure supplement 5—source data 1. [file elife-59095-fig5-figsupp5-data1.xlsx]

## Sheet: Figure 5— FS5 - Raw data
Figure 5- figure supplement 5 - Hemocyte counts with and without vortexing. After vortexing treatment, sessile hemocytes are relocated into circulation.
Sample	Chamber_no	Line	Selection_Regime	Treatment	Compartment	Generation	Vial	Plasmatocytes	Lamellocytes	THC	Lamellocyte_Proportion
1	1	C1	No Parasitism	No Vortex	Circulating	42	1	79	1	80	0.0125
2	2	C1	No Parasitism	No Vortex	Circulating	42	1	68	4	72	0.0555556
3	3	C2	No Parasitism	No Vortex	Circulating	42	1	89	3	92	0.0326087
4	4	C2	No Parasitism	No Vortex	Circulating	42	1	68	0	68	0
5	5	C3	No Parasitism	No Vortex	Circulating	42	1	144	4	148	0.027027
6	6	C3	No Parasitism	No Vortex	Circulating	42	1	95	0	95	0
7	7	NSRef-1	High Parasitism	No Vortex	Circulating	42	1	250	18	268	0.0671642
8	8	NSRef-1	High Parasitism	No Vortex	Circulating	42	1	290	9	299	0.0301003
9	9	NSRef-2	High Parasitism	No Vortex	Circulating	42	1	167	9	176	0.0511364
10	10	NSRef-2	High Parasitism	No Vortex	Circulating	42	1	200	19	219	0.086758
11	11	NSRef-3	High Parasitism	No Vortex	Circulating	42	1	134	7	141	0.0496454
12	12	NSRef-3	High Parasitism	No Vortex	Circulating	42	1	286	5	291	0.0171821
13	1	C1	No Parasitism	Vortex	Circulating + Sessile	42	2	276	1	277	0.00361011
14	2	C1	No Parasitism	Vortex	Circulating + Sessile	42	2	206	3	209	0.0143541
15	3	C2	No Parasitism	Vortex	Circulating + Sessile	42	2	120	4	124	0.0322581
16	4	C2	No Parasitism	Vortex	Circulating + Sessile	42	2	197	7	204	0.0343137
17	5	C3	No Parasitism	Vortex	Circulating + Sessile	42	2	170	1	171	0.00584795
18	6	C3	No Parasitism	Vortex	Circulating + Sessile	42	2	239	1	240	0.00416667
19	7	NSRef-1	High Parasitism	Vortex	Circulating + Sessile	42	2	404	6	410	0.0146341
20	8	NSRef-1	High Parasitism	Vortex	Circulating + Sessile	42	2	347	21	368	0.0570652
21	9	NSRef-2	High Parasitism	Vortex	Circulating + Sessile	42	2	237	2	239	0.0083682
22	10	NSRef-2	High Parasitism	Vortex	Circulating + Sessile	42	2	482	4	486	0.00823045
23	11	NSRef-3	High Parasitism	Vortex	Circulating + Sessile	42	2	303	2	305	0.00655738
24	12	NSRef-3	High Parasitism	Vortex	Circulating + Sessile	42	2	216	1	217	0.0046083
1	1	NSRef-1	High Parasitism	No Vortex	Circulating	42	1	289	23	312	0.0737179
2	2	NSRef-1	High Parasitism	No Vortex	Circulating	42	1	126	1	127	0.00787402
3	3	NSRef-2	High Parasitism	No Vortex	Circulating	42	1	253	1	254	0.00393701
4	4	NSRef-2	High Parasitism	No Vortex	Circulating	42	1	169	1	170	0.00588235
5	5	NSRef-3	High Parasitism	No Vortex	Circulating	42	1	187	7	194	0.0360825
6	6	NSRef-3	High Parasitism	No Vortex	Circulating	42	1	224	2	226	0.00884956
7	7	C1	No Parasitism	No Vortex	Circulating	42	1	162	6	168	0.0357143
8	8	C1	No Parasitism	No Vortex	Circulating	42	1	62	3	65	0.0461538
9	9	C2	No Parasitism	No Vortex	Circulating	42	1	64	0	64	0
10	10	C2	No Parasitism	No Vortex	Circulating	42	1	80	0	80	0
11	11	C3	No Parasitism	No Vortex	Circulating	42	1	78	1	79	0.0126582
12	12	C3	No Parasitism	No Vortex	Circulating	42	1	83	1	84	0.0119048
13	1	NSRef-1	High Parasitism	Vortex	Circulating + Sessile	42	2	279	7	286	0.0244755
14	2	NSRef-1	High Parasitism	Vortex	Circulating + Sessile	42	2	353	1	354	0.00282486
15	3	NSRef-2	High Parasitism	Vortex	Circulating + Sessile	42	2	327	1	328	0.00304878
16	4	NSRef-2	High Parasitism	Vortex	Circulating + Sessile	42	2	340	2	342	0.00584795
17	5	NSRef-3	High Parasitism	Vortex	Circulating + Sessile	42	2	437	7	444	0.0157658
18	6	NSRef-3	High Parasitism	Vortex	Circulating + Sessile	42	2	319	7	326	0.0214724
19	7	C1	No Parasitism	Vortex	Circulating + Sessile	42	2	NA	NA	NA	NA
20	8	C1	No Parasitism	Vortex	Circulating + Sessile	42	2	190	2	192	0.0104167
21	9	C2	No Parasitism	Vortex	Circulating + Sessile	42	2	166	3	169	0.0177515
22	10	C2	No Parasitism	Vortex	Circulating + Sessile	42	2	102	3	105	0.0285714
23	11	C3	No Parasitism	Vortex	Circulating + Sessile	42	2	147	1	148	0.00675676
24	12	C3	No Parasitism	Vortex	Circulating + Sessile	42	2	180	0	180	0
1	1	C1	No Parasitism	No Vortex	Circulating	43	1	62	0	62	0
2	2	C1	No Parasitism	No Vortex	Circulating	43	1	62	0	62	0
3	3	C2	No Parasitism	No Vortex	Circulating	43	1	20	1	21	0.047619
4	4	C2	No Parasitism	No Vortex	Circulating	43	1	37	2	39	0.0512821
5	5	C3	No Parasitism	No Vortex	Circulating	43	1	22	1	23	0.0434783
6	6	C3	No Parasitism	No Vortex	Circulating	43	1	47	1	48	0.0208333
7	7	NSRef-1	High Parasitism	No Vortex	Circulating	43	1	175	3	178	0.0168539
8	8	NSRef-1	High Parasitism	No Vortex	Circulating	43	1	163	3	166	0.0180723
9	9	NSRef-2	High Parasitism	No Vortex	Circulating	43	1	183	3	186	0.016129
10	10	NSRef-2	High Parasitism	No Vortex	Circulating	43	1	180	1	181	0.00552486
11	11	NSRef-3	High Parasitism	No Vortex	Circulating	43	1	116	3	119	0.0252101
12	12	NSRef-3	High Parasitism	No Vortex	Circulating	43	1	162	0	162	0
13	1	C1	No Parasitism	Vortex	Circulating + Sessile	43	2	122	0	122	0
14	2	C1	No Parasitism	Vortex	Circulating + Sessile	43	2	131	1	132	0.00757576
15	3	C2	No Parasitism	Vortex	Circulating + Sessile	43	2	17	0	17	0
16	4	C2	No Parasitism	Vortex	Circulating + Sessile	43	2	75	0	75	0
17	5	C3	No Parasitism	Vortex	Circulating + Sessile	43	2	102	2	104	0.0192308
18	6	C3	No Parasitism	Vortex	Circulating + Sessile	43	2	119	0	119	0
19	7	NSRef-1	High Parasitism	Vortex	Circulating + Sessile	43	2	256	5	261	0.0191571
20	8	NSRef-1	High Parasitism	Vortex	Circulating + Sessile	43	2	289	10	299	0.0334448
21	9	NSRef-2	High Parasitism	Vortex	Circulating + Sessile	43	2	145	20	165	0.121212
22	10	NSRef-2	High Parasitism	Vortex	Circulating + Sessile	43	2	206	1	207	0.00483092
23	11	NSRef-3	High Parasitism	Vortex	Circulating + Sessile	43	2	250	3	253	0.0118577
24	12	NSRef-3	High Parasitism	Vortex	Circulating + Sessile	43	2	217	0	217	0
1	1	C1	No Parasitism	No Vortex	Circulating	43	1	167	0	167	0
2	2	C1	No Parasitism	No Vortex	Circulating	43	1	142	7	149	0.0469799
3	3	C2	No Parasitism	No Vortex	Circulating	43	1	47	0	47	0
4	4	C2	No Parasitism	No Vortex	Circulating	43	1	19	0	19	0
5	5	C3	No Parasitism	No Vortex	Circulating	43	1	61	1	62	0.016129
6	6	C3	No Parasitism	No Vortex	Circulating	43	1	50	0	50	0
7	7	NSRef-1	High Parasitism	No Vortex	Circulating	43	1	136	3	139	0.0215827
8	8	NSRef-1	High Parasitism	No Vortex	Circulating	43	1	54	1	55	0.0181818
9	9	NSRef-2	High Parasitism	No Vortex	Circulating	43	1	138	4	142	0.028169
10	10	NSRef-2	High Parasitism	No Vortex	Circulating	43	1	220	8	228	0.0350877
11	11	NSRef-3	High Parasitism	No Vortex	Circulating	43	1	184	2	186	0.0107527
12	12	NSRef-3	High Parasitism	No Vortex	Circulating	43	1	132	4	136	0.0294118
13	1	C1	No Parasitism	Vortex	Circulating + Sessile	43	2	250	7	257	0.0272374
14	2	C1	No Parasitism	Vortex	Circulating + Sessile	43	2	189	0	189	0
15	3	C2	No Parasitism	Vortex	Circulating + Sessile	43	2	53	0	53	0
16	4	C2	No Parasitism	Vortex	Circulating + Sessile	43	2	57	0	57	0
17	5	C3	No Parasitism	Vortex	Circulating + Sessile	43	2	115	0	115	0
18	6	C3	No Parasitism	Vortex	Circulating + Sessile	43	2	143	0	143	0
19	7	NSRef-1	High Parasitism	Vortex	Circulating + Sessile	43	2	227	8	235	0.0340426
20	8	NSRef-1	High Parasitism	Vortex	Circulating + Sessile	43	2	266	1	267	0.00374532
21	9	NSRef-2	High Parasitism	Vortex	Circulating + Sessile	43	2	214	5	219	0.022831
22	10	NSRef-2	High Parasitism	Vortex	Circulating + Sessile	43	2	308	0	308	0
23	11	NSRef-3	High Parasitism	Vortex	Circulating + Sessile	43	2	292	0	292	0
24	12	NSRef-3	High Parasitism	Vortex	Circulating + Sessile	43	2	303	0	303	0

## Sheet: Sheet1
###To run script: Delete first two rows of raw data, save it as .csv format and run script on R
library(ggplot2)
library(plyr)
#set wd
setwd(dirname(rstudioapi::getActiveDocumentContext()$path))
list.files()
data = read.table("Figure 5— FS5 - Raw data.csv", sep = ",", dec = ".", header = TRUE)
head(data)
data$Generation = as.factor(data$Generation)
data$Selection_Regime = factor(data$Selection_Regime, levels=c('No Parasitism', 'High Parasitism'))
str(data)
#Create data summaries
se<-function(x){sd(x)/sqrt(length(x))}
data_summary = ddply(data,.(Line, Selection_Regime, Compartment, Generation),summarise,
mean_THC = mean(THC, na.rm = T),
se_THC = se(THC),
mean_Plasmatocytes = mean(Plasmatocytes, na.rm=T),
mean_Lamellocytes = mean(Lamellocytes, na.rm=T),
mean_Lamellocyte_Proportion = mean(Lamellocyte_Proportion, na.rm=T))
data_summary_2 = ddply(data_summary,.(Selection_Regime, Compartment, Generation),summarise,
mean_THC = mean(mean_THC, na.rm=T),
mean_Plasmatocytes = mean(mean_Plasmatocytes, na.rm=T),
mean_Lamellocytes = mean(mean_Lamellocytes, na.rm=T),
mean_Lamellocyte_Proportion = mean(mean_Lamellocyte_Proportion, na.rm=T))
###Plot data
color_vector = c('#0072b2','#d55e00')
THC = ggplot(data_summary_2, aes(x=Generation, y=mean_THC))+
geom_bar(stat='identity', position = position_dodge(width = .9), aes(fill=Selection_Regime), alpha=.5)+
geom_point(data=data_summary, position = position_dodge(width = .9), aes(y=mean_THC, color=Selection_Regime), size=2.5)+
scale_color_manual(values = c(rep("grey0",3)))+
scale_fill_manual(name='Selection regime', values = color_vector)+
guides(color=FALSE)+
theme_bw()+
xlab(expression('Generation'))+
ylab(expression(paste('Total hemocytes (x50/',mu*L,')')))+
scale_y_continuous(expand = c(0, 0))+
theme(panel.grid = element_blank(),
axis.text.x = element_text(angle = 0, color='grey30',size=12),
axis.title.y = element_text(colour = "grey30", face='bold',size=15),
axis.title.x = element_text(colour = "grey30", face='bold',size=15),
axis.text.y = element_text(size=15),
panel.border = element_blank(),
axis.line = element_line(colour = "grey30"),
strip.text.x = element_text(size = 12, , face = "bold"),
legend.position = c(0.15, 0.85))+
facet_grid(.~Compartment)
THC
##Save plots
pdf(file="THC_Circulating_and_Sessile.pdf",height=5,width=6)
THC
dev.off()
###Stats
library(car)
library(lme4)
m = lmer( mean_THC ~ Selection_Regime*Compartment + (1|Generation) + (1|Line),
data=data_summary)
Anova(m)
