# Supplementary material for: Constitutive activation of cellular immunity underlies the evolution of resistance to infection in Drosophila
Source: eLife. 2020 Dec 24;9:e59095. doi: 10.7554/eLife.59095 (PMC7785293; doi:10.7554/eLife.59095)
Supplement: Figure 5—figure supplement 6—source data 1. [file elife-59095-fig5-figsupp6-data1.xlsx]

## Sheet: Figure 5— FS6 - Raw data
Figure 5 figure supplement 6 - Counts of melanized crystal cells on the dorsal side of A7 larval segment
Larva	Sex	Line	Selection_Regime	Generation	Vial	Crystal_Cells
1	Female	C1	No Parasitism	42	1	79
2	Female	C1	No Parasitism	42	1	71
3	Female	C1	No Parasitism	42	1	71
4	Female	C1	No Parasitism	42	1	55
5	Female	C1	No Parasitism	42	1	46
6	Female	C1	No Parasitism	42	1	52
7	Female	C1	No Parasitism	42	1	78
8	Female	C1	No Parasitism	42	1	45
9	Female	C1	No Parasitism	42	1	147
10	Female	C1	No Parasitism	42	1	126
1	Male	C1	No Parasitism	42	1	77
2	Male	C1	No Parasitism	42	1	94
3	Male	C1	No Parasitism	42	1	45
4	Male	C1	No Parasitism	42	1	73
5	Male	C1	No Parasitism	42	1	51
6	Male	C1	No Parasitism	42	1	75
7	Male	C1	No Parasitism	42	1	48
8	Male	C1	No Parasitism	42	1	66
9	Male	C1	No Parasitism	42	1	64
10	Male	C1	No Parasitism	42	1	126
1	Female	C2	No Parasitism	42	1	53
2	Female	C2	No Parasitism	42	1	77
3	Female	C2	No Parasitism	42	1	64
4	Female	C2	No Parasitism	42	1	84
5	Female	C2	No Parasitism	42	1	75
6	Female	C2	No Parasitism	42	1	45
7	Female	C2	No Parasitism	42	1	63
8	Female	C2	No Parasitism	42	1	64
9	Female	C2	No Parasitism	42	1	92
10	Female	C2	No Parasitism	42	1	81
1	Male	C2	No Parasitism	42	1	69
2	Male	C2	No Parasitism	42	1	62
3	Male	C2	No Parasitism	42	1	45
4	Male	C2	No Parasitism	42	1	63
5	Male	C2	No Parasitism	42	1	52
6	Male	C2	No Parasitism	42	1	62
7	Male	C2	No Parasitism	42	1	58
8	Male	C2	No Parasitism	42	1	107
9	Male	C2	No Parasitism	42	1	88
10	Male	C2	No Parasitism	42	1	24
1	Female	C3	No Parasitism	42	1	74
2	Female	C3	No Parasitism	42	1	78
3	Female	C3	No Parasitism	42	1	78
4	Female	C3	No Parasitism	42	1	60
5	Female	C3	No Parasitism	42	1	58
6	Female	C3	No Parasitism	42	1	47
7	Female	C3	No Parasitism	42	1	86
8	Female	C3	No Parasitism	42	1	38
9	Female	C3	No Parasitism	42	1	45
10	Female	C3	No Parasitism	42	1	61
1	Male	C3	No Parasitism	42	1	40
2	Male	C3	No Parasitism	42	1	32
3	Male	C3	No Parasitism	42	1	64
4	Male	C3	No Parasitism	42	1	74
5	Male	C3	No Parasitism	42	1	92
6	Male	C3	No Parasitism	42	1	49
7	Male	C3	No Parasitism	42	1	67
8	Male	C3	No Parasitism	42	1	59
9	Male	C3	No Parasitism	42	1	30
10	Male	C3	No Parasitism	42	1	61
1	Female	NSRef-1	High Parasitism	42	1	85
2	Female	NSRef-1	High Parasitism	42	1	99
3	Female	NSRef-1	High Parasitism	42	1	114
4	Female	NSRef-1	High Parasitism	42	1	72
5	Female	NSRef-1	High Parasitism	42	1	113
6	Female	NSRef-1	High Parasitism	42	1	62
7	Female	NSRef-1	High Parasitism	42	1	56
8	Female	NSRef-1	High Parasitism	42	1	39
9	Female	NSRef-1	High Parasitism	42	1	59
10	Female	NSRef-1	High Parasitism	42	1	47
1	Male	NSRef-1	High Parasitism	42	1	38
2	Male	NSRef-1	High Parasitism	42	1	87
3	Male	NSRef-1	High Parasitism	42	1	69
4	Male	NSRef-1	High Parasitism	42	1	71
5	Male	NSRef-1	High Parasitism	42	1	48
6	Male	NSRef-1	High Parasitism	42	1	101
7	Male	NSRef-1	High Parasitism	42	1	82
8	Male	NSRef-1	High Parasitism	42	1	76
9	Male	NSRef-1	High Parasitism	42	1	65
10	Male	NSRef-1	High Parasitism	42	1	57
1	Female	NSRef-2	High Parasitism	42	1	85
2	Female	NSRef-2	High Parasitism	42	1	72
3	Female	NSRef-2	High Parasitism	42	1	88
4	Female	NSRef-2	High Parasitism	42	1	85
5	Female	NSRef-2	High Parasitism	42	1	145
6	Female	NSRef-2	High Parasitism	42	1	6
7	Female	NSRef-2	High Parasitism	42	1	59
8	Female	NSRef-2	High Parasitism	42	1	76
9	Female	NSRef-2	High Parasitism	42	1	66
10	Female	NSRef-2	High Parasitism	42	1	70
1	Male	NSRef-2	High Parasitism	42	1	93
2	Male	NSRef-2	High Parasitism	42	1	71
3	Male	NSRef-2	High Parasitism	42	1	66
4	Male	NSRef-2	High Parasitism	42	1	37
5	Male	NSRef-2	High Parasitism	42	1	82
6	Male	NSRef-2	High Parasitism	42	1	73
7	Male	NSRef-2	High Parasitism	42	1	25
8	Male	NSRef-2	High Parasitism	42	1	98
9	Male	NSRef-2	High Parasitism	42	1	35
10	Male	NSRef-2	High Parasitism	42	1	69
1	Female	NSRef-3	High Parasitism	42	1	97
2	Female	NSRef-3	High Parasitism	42	1	83
3	Female	NSRef-3	High Parasitism	42	1	62
4	Female	NSRef-3	High Parasitism	42	1	92
5	Female	NSRef-3	High Parasitism	42	1	84
6	Female	NSRef-3	High Parasitism	42	1	30
7	Female	NSRef-3	High Parasitism	42	1	14
8	Female	NSRef-3	High Parasitism	42	1	26
9	Female	NSRef-3	High Parasitism	42	1	23
10	Female	NSRef-3	High Parasitism	42	1	42
1	Male	NSRef-3	High Parasitism	42	1	62
2	Male	NSRef-3	High Parasitism	42	1	102
3	Male	NSRef-3	High Parasitism	42	1	45
4	Male	NSRef-3	High Parasitism	42	1	90
5	Male	NSRef-3	High Parasitism	42	1	53
6	Male	NSRef-3	High Parasitism	42	1	72
7	Male	NSRef-3	High Parasitism	42	1	78
8	Male	NSRef-3	High Parasitism	42	1	34
9	Male	NSRef-3	High Parasitism	42	1	66
10	Male	NSRef-3	High Parasitism	42	1	20
1	Female	C1	No Parasitism	44	1	61
2	Female	C1	No Parasitism	44	1	50
3	Female	C1	No Parasitism	44	1	124
4	Female	C1	No Parasitism	44	1	85
5	Female	C1	No Parasitism	44	1	49
6	Female	C1	No Parasitism	44	1	67
7	Female	C1	No Parasitism	44	1	35
8	Female	C1	No Parasitism	44	1	42
9	Female	C1	No Parasitism	44	1	44
10	Female	C1	No Parasitism	44	1	71
1	Female	C2	No Parasitism	44	1	47
2	Female	C2	No Parasitism	44	1	128
3	Female	C2	No Parasitism	44	1	73
4	Female	C2	No Parasitism	44	1	67
5	Female	C2	No Parasitism	44	1	26
6	Female	C2	No Parasitism	44	1	34
7	Female	C2	No Parasitism	44	1	57
8	Female	C2	No Parasitism	44	1	50
9	Female	C2	No Parasitism	44	1	44
10	Female	C2	No Parasitism	44	1	48
1	Female	C3	No Parasitism	44	1	35
2	Female	C3	No Parasitism	44	1	54
3	Female	C3	No Parasitism	44	1	48
4	Female	C3	No Parasitism	44	1	65
5	Female	C3	No Parasitism	44	1	63
6	Female	C3	No Parasitism	44	1	34
7	Female	C3	No Parasitism	44	1	47
8	Female	C3	No Parasitism	44	1	56
9	Female	C3	No Parasitism	44	1	15
10	Female	C3	No Parasitism	44	1	63
1	Female	NSRef-1	High Parasitism	44	1	50
2	Female	NSRef-1	High Parasitism	44	1	32
3	Female	NSRef-1	High Parasitism	44	1	55
4	Female	NSRef-1	High Parasitism	44	1	85
5	Female	NSRef-1	High Parasitism	44	1	33
6	Female	NSRef-1	High Parasitism	44	1	112
7	Female	NSRef-1	High Parasitism	44	1	58
8	Female	NSRef-1	High Parasitism	44	1	34
9	Female	NSRef-1	High Parasitism	44	1	29
10	Female	NSRef-1	High Parasitism	44	1	17
1	Female	NSRef-2	High Parasitism	44	1	74
2	Female	NSRef-2	High Parasitism	44	1	4
3	Female	NSRef-2	High Parasitism	44	1	37
4	Female	NSRef-2	High Parasitism	44	1	65
5	Female	NSRef-2	High Parasitism	44	1	53
6	Female	NSRef-2	High Parasitism	44	1	21
7	Female	NSRef-2	High Parasitism	44	1	77
8	Female	NSRef-2	High Parasitism	44	1	90
9	Female	NSRef-2	High Parasitism	44	1	38
10	Female	NSRef-2	High Parasitism	44	1	6
1	Female	NSRef-3	High Parasitism	44	1	39
2	Female	NSRef-3	High Parasitism	44	1	89
3	Female	NSRef-3	High Parasitism	44	1	59
4	Female	NSRef-3	High Parasitism	44	1	50
5	Female	NSRef-3	High Parasitism	44	1	48
6	Female	NSRef-3	High Parasitism	44	1	64
7	Female	NSRef-3	High Parasitism	44	1	40
8	Female	NSRef-3	High Parasitism	44	1	60
9	Female	NSRef-3	High Parasitism	44	1	87
10	Female	NSRef-3	High Parasitism	44	1	36
1	Male	C1	No Parasitism	44	1	46
2	Male	C1	No Parasitism	44	1	18
3	Male	C1	No Parasitism	44	1	11
4	Male	C1	No Parasitism	44	1	44
5	Male	C1	No Parasitism	44	1	7
6	Male	C1	No Parasitism	44	1	55
7	Male	C1	No Parasitism	44	1	28
8	Male	C1	No Parasitism	44	1	48
9	Male	C1	No Parasitism	44	1	49
10	Male	C1	No Parasitism	44	1	76
1	Male	C2	No Parasitism	44	1	49
2	Male	C2	No Parasitism	44	1	70
3	Male	C2	No Parasitism	44	1	28
4	Male	C2	No Parasitism	44	1	66
5	Male	C2	No Parasitism	44	1	70
6	Male	C2	No Parasitism	44	1	18
7	Male	C2	No Parasitism	44	1	69
8	Male	C2	No Parasitism	44	1	44
9	Male	C2	No Parasitism	44	1	59
10	Male	C2	No Parasitism	44	1	34
1	Male	C3	No Parasitism	44	1	35
2	Male	C3	No Parasitism	44	1	15
3	Male	C3	No Parasitism	44	1	30
4	Male	C3	No Parasitism	44	1	52
5	Male	C3	No Parasitism	44	1	120
6	Male	C3	No Parasitism	44	1	47
7	Male	C3	No Parasitism	44	1	66
8	Male	C3	No Parasitism	44	1	66
9	Male	C3	No Parasitism	44	1	26
10	Male	C3	No Parasitism	44	1	22
1	Male	NSRef-1	High Parasitism	44	1	57
2	Male	NSRef-1	High Parasitism	44	1	9
3	Male	NSRef-1	High Parasitism	44	1	11
4	Male	NSRef-1	High Parasitism	44	1	13
5	Male	NSRef-1	High Parasitism	44	1	49
6	Male	NSRef-1	High Parasitism	44	1	16
7	Male	NSRef-1	High Parasitism	44	1	60
8	Male	NSRef-1	High Parasitism	44	1	82
9	Male	NSRef-1	High Parasitism	44	1	92
10	Male	NSRef-1	High Parasitism	44	1	87
1	Male	NSRef-2	High Parasitism	44	1	145
2	Male	NSRef-2	High Parasitism	44	1	23
3	Male	NSRef-2	High Parasitism	44	1	43
4	Male	NSRef-2	High Parasitism	44	1	26
5	Male	NSRef-2	High Parasitism	44	1	51
6	Male	NSRef-2	High Parasitism	44	1	38
7	Male	NSRef-2	High Parasitism	44	1	52
8	Male	NSRef-2	High Parasitism	44	1	111
9	Male	NSRef-2	High Parasitism	44	1	55
10	Male	NSRef-2	High Parasitism	44	1	113
1	Male	NSRef-3	High Parasitism	44	1	34
2	Male	NSRef-3	High Parasitism	44	1	34
3	Male	NSRef-3	High Parasitism	44	1	47
4	Male	NSRef-3	High Parasitism	44	1	15
5	Male	NSRef-3	High Parasitism	44	1	9
6	Male	NSRef-3	High Parasitism	44	1	76
7	Male	NSRef-3	High Parasitism	44	1	61
8	Male	NSRef-3	High Parasitism	44	1	20
9	Male	NSRef-3	High Parasitism	44	1	45
10	Male	NSRef-3	High Parasitism	44	1	80

## Sheet: Figure 5— FS6 -R script
###To run script: Delete first two rows of raw data, save it as .csv format and run script on R
library(ggplot2)
library(plyr)
#set wd
setwd(dirname(rstudioapi::getActiveDocumentContext()$path))
list.files()
data = read.table("Figure 5— FS6 - Raw data.csv", sep = ",", dec = ".", header = TRUE)
head(data)
data$Generation = as.factor(data$Generation)
data$Selection_Regime = factor(data$Selection_Regime, levels=c('No Parasitism', 'High Parasitism'))
str(data)
#Create data summaries
se<-function(x){sd(x)/sqrt(length(x))}
data_summary = ddply(data,.(Line, Selection_Regime, Generation, Sex),summarise,
mean_Crystal_Cells = mean(Crystal_Cells, na.rm = T))
data_summary_2 = ddply(data_summary,.(Selection_Regime, Generation, Sex),summarise,
mean_Crystal_Cells = mean(mean_Crystal_Cells, na.rm=T))
###Plot data
stage.labs <- c(
`Female` = "Female larvae",
`Male` = "Male larvae")
color_vector = c('#0072b2','#d55e00')
Crystal_Cells = ggplot(data_summary_2, aes(x=Generation, y=mean_Crystal_Cells))+
geom_bar(stat='identity', aes(fill=Selection_Regime), position=position_dodge(width=.9), alpha=0.5)+
geom_point(data=data_summary, position = position_dodge(width = 1), aes(y=mean_Crystal_Cells, group=Selection_Regime), size=2.5)+
scale_fill_manual(name='Selection regime', values = color_vector)+
guides(color=FALSE)+
theme_bw()+
xlab(expression('Selection regime'))+
ylab(expression(paste('Crystal Cells')))+
scale_y_continuous(expand = c(0, 0))+
theme(panel.grid = element_blank(),
axis.title.x = element_text(colour = "grey0", face='bold',size=14, vjust=-1),
axis.text.x = element_text(angle = 0, color='grey0',size=12),
axis.title.y = element_text(colour = "grey0", face='bold',size=14),
axis.text.y = element_text(colour = "grey0",size=12),
panel.border = element_blank(),
axis.line = element_line(colour = "grey30"))+
facet_grid(.~Sex, labeller = as_labeller(stage.labs))
Crystal_Cells
##Save plots
pdf(file="Crystal_Cells.pdf",height=5,width=6)
Crystal_Cells
dev.off()
###Stats
library(car)
library(lme4)
m = lmer(mean_Crystal_Cells ~ Selection_Regime + Sex + (1|Line) + (1|Generation), data=data_summary)
Anova(m, type='II')
