# Supplementary material for: Constitutive activation of cellular immunity underlies the evolution of resistance to infection in Drosophila
Source: eLife. 2020 Dec 24;9:e59095. doi: 10.7554/eLife.59095 (PMC7785293; doi:10.7554/eLife.59095)
Supplement: Figure 5—source data 1. [file elife-59095-fig5-data1.xlsx]

## Sheet: Figure 5A,B - Raw Data
Figure 5A,B - Hemocyte counts in control larvae and 48 hours post infection for each line. For clarity, in Figure 5A only generation 34 is depicted. Supllemental Figure 11 has all generations
Line	Selection_Regime	Treatment	Generation	Plasmatocytes	Lamellocytes	THC	Lamellocyte_Proportion
C1	No Parasitism	No Infection	11	21	2	23	0.0869565
C1	No Parasitism	No Infection	11	15	0	15	0
NSRef-2	High Parasitism	No Infection	11	40	2	42	0.047619
NSRef-2	High Parasitism	No Infection	11	71	2	73	0.0273973
NSRef-1	High Parasitism	Infection	11	82	13	95	0.136842
NSRef-1	High Parasitism	Infection	11	147	46	193	0.238342
C2	No Parasitism	No Infection	11	89	14	103	0.135922
C2	No Parasitism	No Infection	11	92	15	107	0.140187
C3	No Parasitism	No Infection	11	59	23	82	0.280488
C3	No Parasitism	No Infection	11	114	13	127	0.102362
C3	No Parasitism	Infection	11	228	20	248	0.0806452
C3	No Parasitism	Infection	11	141	24	165	0.145455
NSRef-2	High Parasitism	Infection	11	117	24	141	0.170213
NSRef-2	High Parasitism	Infection	11	169	30	199	0.150754
NSRef-3	High Parasitism	Infection	11	92	25	117	0.213675
NSRef-3	High Parasitism	Infection	11	176	42	218	0.192661
NSRef-3	High Parasitism	Infection	11	151	26	177	0.146893
NSRef-3	High Parasitism	Infection	11	NA	NA	NA	NA
C2	No Parasitism	Infection	11	142	47	189	0.248677
C2	No Parasitism	Infection	11	170	22	192	0.114583
NSRef-1	High Parasitism	No Infection	11	85	7	92	0.076087
NSRef-1	High Parasitism	No Infection	11	124	9	133	0.0676692
C1	No Parasitism	Infection	11	118	30	148	0.202703
C1	No Parasitism	Infection	11	126	19	145	0.131034
NSRef-2	High Parasitism	No Infection	11	30	2	32	0.0625
NSRef-2	High Parasitism	No Infection	11	18	1	19	0.0526316
C3	No Parasitism	No Infection	11	14	2	16	0.125
C3	No Parasitism	No Infection	11	10	0	10	0
C2	No Parasitism	Infection	11	47	0	47	0
C2	No Parasitism	Infection	11	79	15	94	0.159574
NSRef-3	High Parasitism	Infection	11	100	26	126	0.206349
NSRef-3	High Parasitism	Infection	11	79	36	115	0.313043
C1	No Parasitism	No Infection	11	35	4	39	0.102564
C1	No Parasitism	No Infection	11	22	6	28	0.214286
NSRef-1	High Parasitism	Infection	11	81	19	100	0.19
NSRef-1	High Parasitism	Infection	11	80	28	108	0.259259
NSRef-1	High Parasitism	Infection	11	101	21	122	0.172131
NSRef-1	High Parasitism	Infection	11	171	35	206	0.169903
NSRef-1	High Parasitism	No Infection	11	121	13	134	0.0970149
NSRef-1	High Parasitism	No Infection	11	96	14	110	0.127273
C3	No Parasitism	Infection	11	97	15	112	0.133929
C3	No Parasitism	Infection	11	119	29	148	0.195946
C1	No Parasitism	Infection	11	142	25	167	0.149701
C1	No Parasitism	Infection	11	150	12	162	0.0740741
C2	No Parasitism	No Infection	11	37	2	39	0.0512821
C2	No Parasitism	No Infection	11	41	2	43	0.0465116
NSRef-3	High Parasitism	No Infection	11	44	4	48	0.0833333
NSRef-3	High Parasitism	No Infection	11	74	12	86	0.139535
C3	No Parasitism	Infection	11	81	15	96	0.15625
C3	No Parasitism	Infection	11	61	21	82	0.256098
C2	No Parasitism	Infection	11	93	10	103	0.0970874
C2	No Parasitism	Infection	11	116	25	141	0.177305
NSRef-1	High Parasitism	No Infection	11	67	9	76	0.118421
NSRef-1	High Parasitism	No Infection	11	NA	NA	0	NA
NSRef-1	High Parasitism	Infection	11	150	33	183	0.180328
NSRef-1	High Parasitism	Infection	11	NA	NA	0	NA
NSRef-2	High Parasitism	Infection	11	181	41	222	0.184685
NSRef-2	High Parasitism	Infection	11	197	46	243	0.1893
C1	No Parasitism	Infection	11	74	5	79	0.0632911
C1	No Parasitism	Infection	11	135	13	148	0.0878378
C1	No Parasitism	No Infection	11	22	2	24	0.0833333
C1	No Parasitism	No Infection	11	28	0	28	0
NSRef-2	High Parasitism	Infection	11	68	19	87	0.218391
NSRef-2	High Parasitism	Infection	11	118	21	139	0.151079
C2	No Parasitism	No Infection	11	18	0	18	0
C2	No Parasitism	No Infection	11	31	3	34	0.0882353
NSRef-2	High Parasitism	No Infection	11	90	2	92	0.0217391
NSRef-2	High Parasitism	No Infection	11	63	8	71	0.112676
C3	No Parasitism	No Infection	11	12	0	12	0
C3	No Parasitism	No Infection	11	10	1	11	0.0909091
NSRef-3	High Parasitism	No Infection	11	26	4	30	0.133333
NSRef-3	High Parasitism	No Infection	11	38	7	45	0.155556
NSRef-3	High Parasitism	No Infection	11	69	2	71	0.028169
NSRef-3	High Parasitism	No Infection	11	67	1	68	0.0147059
C1	No Parasitism	Infection	14	123	17	140	0.121429
C2	No Parasitism	Infection	14	148	41	189	0.216931
C3	No Parasitism	Infection	14	111	0	111	0
NSRef-1	High Parasitism	Infection	14	140	33	173	0.190751
NSRef-2	High Parasitism	Infection	14	201	66	267	0.247191
NSRef-3	High Parasitism	Infection	14	89	12	101	0.118812
NSRef-1	High Parasitism	No Infection	14	49	1	50	0.02
NSRef-2	High Parasitism	No Infection	14	78	2	80	0.025
NSRef-3	High Parasitism	No Infection	14	65	0	65	0
C1	No Parasitism	No Infection	14	95	4	99	0.040404
C2	No Parasitism	No Infection	14	40	0	40	0
C3	No Parasitism	No Infection	14	37	0	37	0
C1	No Parasitism	Infection	14	188	60	248	0.241935
C2	No Parasitism	Infection	14	55	6	61	0.0983607
C3	No Parasitism	Infection	14	83	6	89	0.0674157
NSRef-1	High Parasitism	Infection	14	116	9	125	0.072
NSRef-2	High Parasitism	Infection	14	157	58	215	0.269767
NSRef-3	High Parasitism	Infection	14	146	42	188	0.223404
NSRef-1	High Parasitism	No Infection	14	145	26	171	0.152047
NSRef-2	High Parasitism	No Infection	14	108	4	112	0.0357143
NSRef-3	High Parasitism	No Infection	14	92	10	102	0.0980392
C1	No Parasitism	No Infection	14	56	0	56	0
C2	No Parasitism	No Infection	14	56	1	57	0.0175439
C3	No Parasitism	No Infection	14	27	2	29	0.0689655
C1	No Parasitism	Infection	14	133	14	147	0.0952381
C2	No Parasitism	Infection	14	141	44	185	0.237838
C3	No Parasitism	Infection	14	85	10	95	0.105263
NSRef-1	High Parasitism	Infection	14	191	38	229	0.165939
NSRef-2	High Parasitism	Infection	14	212	44	256	0.171875
NSRef-3	High Parasitism	Infection	14	161	30	191	0.157068
NSRef-1	High Parasitism	No Infection	14	77	3	80	0.0375
NSRef-2	High Parasitism	No Infection	14	64	1	65	0.0153846
NSRef-3	High Parasitism	No Infection	14	41	0	41	0
C1	No Parasitism	No Infection	14	63	0	63	0
C2	No Parasitism	No Infection	14	90	0	90	0
C3	No Parasitism	No Infection	14	25	0	25	0
C1	No Parasitism	Infection	14	225	51	276	0.184783
C2	No Parasitism	Infection	14	182	18	200	0.09
C3	No Parasitism	Infection	14	81	4	85	0.0470588
NSRef-1	High Parasitism	Infection	14	143	31	174	0.178161
NSRef-2	High Parasitism	Infection	14	201	88	289	0.304498
NSRef-3	High Parasitism	Infection	14	110	27	137	0.19708
NSRef-1	High Parasitism	No Infection	14	95	95	190	0.5
NSRef-2	High Parasitism	No Infection	14	111	111	222	0.5
NSRef-3	High Parasitism	No Infection	14	94	94	188	0.5
C1	No Parasitism	No Infection	14	77	77	154	0.5
C2	No Parasitism	No Infection	14	32	32	64	0.5
C3	No Parasitism	No Infection	14	21	21	42	0.5
C3	No Parasitism	Infection	20	50	25	75	0.333333
C1	No Parasitism	No Infection	20	70	6	76	0.0789474
NSRef-1	High Parasitism	No Infection	20	236	13	249	0.0522088
NSRef-2	High Parasitism	No Infection	20	125	8	133	0.0601504
C2	No Parasitism	Infection	20	50	18	68	0.264706
NSRef-1	High Parasitism	Infection	20	169	40	209	0.191388
C1	No Parasitism	Infection	20	193	26	219	0.118721
C3	No Parasitism	No Infection	20	15	0	15	0
NSRef-3	High Parasitism	Infection	20	299	62	361	0.171745
C2	No Parasitism	No Infection	20	40	2	42	0.047619
NSRef-3	High Parasitism	No Infection	20	202	6	208	0.0288462
NSRef-2	High Parasitism	Infection	20	276	70	346	0.202312
C3	No Parasitism	Infection	20	73	16	89	0.179775
C1	No Parasitism	Infection	20	190	37	227	0.162996
C2	No Parasitism	Infection	20	71	28	99	0.282828
NSRef-2	High Parasitism	No Infection	20	230	15	245	0.0612245
C3	No Parasitism	No Infection	20	47	4	51	0.0784314
NSRef-1	High Parasitism	Infection	20	211	66	277	0.238267
C2	No Parasitism	No Infection	20	38	7	45	0.155556
NSRef-3	High Parasitism	No Infection	20	133	7	140	0.05
NSRef-3	High Parasitism	Infection	20	232	47	279	0.168459
C1	No Parasitism	No Infection	20	157	0	157	0
NSRef-1	High Parasitism	No Infection	20	348	9	357	0.0252101
NSRef-2	High Parasitism	Infection	20	355	64	419	0.152745
NSRef-1	High Parasitism	Infection	20	257	72	329	0.218845
C3	No Parasitism	No Infection	20	23	5	28	0.178571
C1	No Parasitism	No Infection	20	42	7	49	0.142857
C2	No Parasitism	Infection	20	98	42	140	0.3
NSRef-1	High Parasitism	No Infection	20	254	5	259	0.019305
NSRef-2	High Parasitism	No Infection	20	236	10	246	0.0406504
C1	No Parasitism	Infection	20	186	43	229	0.187773
NSRef-2	High Parasitism	Infection	20	164	77	241	0.319502
C3	No Parasitism	Infection	20	55	18	73	0.246575
C2	No Parasitism	No Infection	20	29	3	32	0.09375
NSRef-3	High Parasitism	No Infection	20	216	9	225	0.04
NSRef-3	High Parasitism	Infection	20	247	55	302	0.182119
C1	No Parasitism	No Infection	20	163	8	171	0.0467836
NSRef-2	High Parasitism	Infection	20	252	68	320	0.2125
NSRef-1	High Parasitism	Infection	20	207	43	250	0.172
C1	No Parasitism	Infection	20	158	40	198	0.20202
C3	No Parasitism	Infection	20	47	50	97	0.515464
NSRef-1	High Parasitism	No Infection	20	166	46	212	0.216981
NSRef-3	High Parasitism	No Infection	20	212	14	226	0.0619469
C3	No Parasitism	No Infection	20	34	5	39	0.128205
NSRef-3	High Parasitism	Infection	20	348	72	420	0.171429
NSRef-2	High Parasitism	No Infection	20	231	6	237	0.0253165
C2	No Parasitism	No Infection	20	17	4	21	0.190476
C2	No Parasitism	Infection	20	70	26	96	0.270833
C1	No Parasitism	No Infection	34	101	0	101	0
C1	No Parasitism	No Infection	34	66	1	67	0.0149254
C2	No Parasitism	No Infection	34	19	0	19	0
C2	No Parasitism	No Infection	34	38	7	45	0.155556
C3	No Parasitism	No Infection	34	61	1	62	0.016129
C3	No Parasitism	No Infection	34	26	0	26	0
NSRef-1	High Parasitism	No Infection	34	59	4	63	0.0634921
NSRef-1	High Parasitism	No Infection	34	42	0	42	0
NSRef-2	High Parasitism	No Infection	34	98	6	104	0.0576923
NSRef-2	High Parasitism	No Infection	34	137	6	143	0.041958
NSRef-3	High Parasitism	No Infection	34	168	5	173	0.0289017
NSRef-3	High Parasitism	No Infection	34	81	7	88	0.0795455
C1	No Parasitism	No Infection	34	35	0	35	0
C1	No Parasitism	No Infection	34	40	0	40	0
C2	No Parasitism	No Infection	34	69	5	74	0.0675676
C2	No Parasitism	No Infection	34	33	0	33	0
C3	No Parasitism	No Infection	34	41	2	43	0.0465116
C3	No Parasitism	No Infection	34	47	0	47	0
NSRef-1	High Parasitism	No Infection	34	98	5	103	0.0485437
NSRef-1	High Parasitism	No Infection	34	100	4	104	0.0384615
NSRef-2	High Parasitism	No Infection	34	73	3	76	0.0394737
NSRef-2	High Parasitism	No Infection	34	145	7	152	0.0460526
NSRef-3	High Parasitism	No Infection	34	175	5	180	0.0277778
NSRef-3	High Parasitism	No Infection	34	103	10	113	0.0884956
C1	No Parasitism	Infection	34	123	37	160	0.23125
C1	No Parasitism	Infection	34	100	85	185	0.459459
C2	No Parasitism	Infection	34	285	42	327	0.12844
C2	No Parasitism	Infection	34	94	35	129	0.271318
C3	No Parasitism	Infection	34	120	73	193	0.378238
C3	No Parasitism	Infection	34	82	15	97	0.154639
NSRef-1	High Parasitism	Infection	34	128	23	151	0.152318
NSRef-1	High Parasitism	Infection	34	111	16	127	0.125984
NSRef-2	High Parasitism	Infection	34	121	35	156	0.224359
NSRef-2	High Parasitism	Infection	34	147	20	167	0.11976
NSRef-3	High Parasitism	Infection	34	141	49	190	0.257895
NSRef-3	High Parasitism	Infection	34	200	66	266	0.24812
NSRef-1	High Parasitism	Infection	34	243	48	291	0.164948
NSRef-1	High Parasitism	Infection	34	167	27	194	0.139175
NSRef-2	High Parasitism	Infection	34	134	33	167	0.197605
NSRef-2	High Parasitism	Infection	34	95	28	123	0.227642
NSRef-3	High Parasitism	Infection	34	160	30	190	0.157895
NSRef-3	High Parasitism	Infection	34	116	33	149	0.221477
C1	No Parasitism	Infection	34	143	17	160	0.10625
C1	No Parasitism	Infection	34	123	18	141	0.12766
C2	No Parasitism	Infection	34	44	6	50	0.12
C2	No Parasitism	Infection	34	131	37	168	0.220238
C3	No Parasitism	Infection	34	96	12	108	0.111111
C3	No Parasitism	Infection	34	79	7	86	0.0813953

## Sheet: Figure 5A,B - R script
###To run script: Delete first two rows of raw data, save it as .csv format and run script on R
library(ggplot2)
library(plyr)
#set wd
setwd(dirname(rstudioapi::getActiveDocumentContext()$path))
list.files()
data = read.table("Figure 5A,B - Raw Data.csv", sep = ",", dec = ".", header = TRUE)
head(data)
str(data)
data$Treatment = factor(data$Treatment, levels=c('No Infection','Infection'))
data$Selection_Regime = factor(data$Selection_Regime, levels=c('No Parasitism','High Parasitism'))
data$Generation = as.factor(data$Generation)
#Filter data for figure 4
data = data[data$Generation=='34',]
#Create column ID that concatenates tratment and selection regime
data$ID = as.factor(paste(data$Selection_Regime, data$Treatment, sep=', '))
data$ID = factor(data$ID, levels=c('No Parasitism, No Infection','No Parasitism, Infection',
'High Parasitism, No Infection', 'High Parasitism, Infection'))
data_summary = ddply(data,.(Line, Selection_Regime, ID, Treatment, Generation),summarise,
mean_THC = mean(THC, na.rm = T),
mean_Plasmatocytes = mean(Plasmatocytes, na.rm=T),
mean_Lamellocytes = mean(Lamellocytes, na.rm=T),
mean_Lamellocyte_Proportion = mean(Lamellocyte_Proportion, na.rm=T))
data_summary_2 = ddply(data_summary,.(Selection_Regime, Treatment, ID, Generation),summarise,
mean_THC = mean(mean_THC, na.rm=T),
mean_Plasmatocytes = mean(mean_Plasmatocytes, na.rm=T),
mean_Lamellocytes = mean(mean_Lamellocytes, na.rm=T),
mean_Lamellocyte_Proportion = mean(mean_Lamellocyte_Proportion, na.rm=T))
##################################
##Plot data
##################################
color_vector = c('#0072b2','#d55e00')
p_THC = ggplot(data_summary_2, aes(x=Generation, y=mean_THC))+
geom_bar(stat='identity', position = position_dodge(width = .9),
aes(group=ID, fill=Selection_Regime, alpha=Treatment))+
geom_point(data=data_summary, position = position_dodge(width = .95), aes(y=mean_THC, group=ID), size=1.5)+
scale_fill_manual(name='Selection regime', values = color_vector)+
scale_alpha_manual(values = c(.5,1))+
guides(linetype = guide_legend(override.aes = list(fill = NA)))+
theme_bw()+
xlab(expression('Generation'))+
ylab(expression(paste('Total hemocytes (x50/',mu*L,')')))+
scale_y_continuous(expand = c(0, 0), limits=c(0, max(data_summary$mean_THC+20)))+
theme(panel.grid = element_blank(),
axis.title.x = element_blank(),
axis.text.x=element_blank(),
axis.ticks.x=element_blank(),
axis.title.y = element_text(colour = "grey0", face='bold',size=15),
axis.text.y = element_text(colour = "grey0", size=15),
panel.border = element_blank(),
axis.line = element_line(colour = "grey30"),
legend.box = "horizontal",
legend.title=element_text(size=10),
legend.text=element_text(size=10),
legend.key.size = unit(.3, "cm"),
legend.margin = margin(0,0,0,0, unit="cm"),
legend.position = 'none')
p_THC
pdf(file="THC_All_Gen34.pdf",height=3,width=2)
p_THC
dev.off()
p_lamellocyte_proportion = ggplot(data_summary_2, aes(x=Generation, y=mean_Lamellocyte_Proportion))+
geom_bar(stat='identity', position = position_dodge(width = .9),
aes(group=ID, fill=Selection_Regime, alpha=Treatment))+
geom_point(data=data_summary, position = position_dodge(width = .95), aes(y=mean_Lamellocyte_Proportion, group=ID), size=1.5)+
scale_fill_manual(name='Selection regime', values = color_vector)+
scale_alpha_manual(values = c(.5,1))+
guides(linetype = guide_legend(override.aes = list(fill = NA)))+
theme_bw()+
xlab(expression('Generation'))+
ylab(expression('Lamellocyte proportion'))+
scale_y_continuous(expand = c(0, 0), limits=c(0,.4))+
theme(panel.grid = element_blank(),
axis.title.x = element_blank(),
axis.text.x=element_blank(),
axis.ticks.x=element_blank(),
axis.title.y = element_text(colour = "grey0", face='bold',size=15),
axis.text.y = element_text(colour = "grey0", size=15),
panel.border = element_blank(),
axis.line = element_line(colour = "grey30"),
legend.box = "horizontal",
legend.title=element_text(size=10),
legend.text=element_text(size=10),
legend.key.size = unit(.3, "cm"),
legend.margin = margin(0,0,0,0, unit="cm"),
legend.position = 'none')
p_lamellocyte_proportion
pdf(file="Lamellocyte_Proportion_Gen34.pdf",height=3,width=2)
p_lamellocyte_proportion
dev.off()
##############################
####Stats
##############################
library(car)
library(lme4)
##THC using means per Line/Treatment/Generation and line as random effect
m_THC_NoInfection = lmer( mean_THC ~ Selection_Regime + Generation + (1|Line),
data=data_summary, subset = (Treatment=='No Infection'))
Anova(m_THC_NoInfection)
m_THC = lmer( mean_THC ~ Selection_Regime*Treatment + Generation + (1|Line),
data=data_summary)
Anova(m_THC)
##Lamellocyte proportion. Proportions are arcsin transformed
asinTransform <- function(p) { asin(sqrt(p)) }
data_summary$mean_Lamellocyte_Proportion_Transformed = asinTransform(data_summary$mean_Lamellocyte_Proportion) #Transform proportion with arcsin
m_Lamellocyte_Proportion_NoInfection = lmer( mean_Lamellocyte_Proportion_Transformed ~ Selection_Regime + Generation + (1|Line),
data=data_summary, subset = (Treatment=='No Infection'))
Anova(m_Lamellocyte_Proportion_NoInfection)
m_Lamellocyte_Proportion = lmer( mean_Lamellocyte_Proportion_Transformed ~ Selection_Regime*Treatment + Generation + (1|Line),
data=data_summary)
Anova(m_Lamellocyte_Proportion)
m4 = glmer(cbind(Lamellocytes, Plasmatocytes) ~ Selection_Regime * Treatment + Generation + (1|Selection_Regime/Line),
family=binomial, data=data)
Anova(m4)
##########################################
##Check fold change of THC with selection
##########################################
library(tidyr)
data_summary_2_subset = data_summary_2[,c(1,2,4,5)]
data_summary_2_subset_spread = spread(data_summary_2_subset, key=c('Selection_Regime'), value=c("mean_THC"))
data_summary_2_subset_spread$Fold_Change = data_summary_2_subset_spread$Selection / data_summary_2_subset_spread$'No Selection'
data_summary_2_subset_spread
##########################################
##Check fold change of THC with selection
##########################################
data_summary_2_subset = data_summary_2[,c(1,2,4,5)]
data_summary_2_subset_spread = spread(data_summary_2_subset, key=c('Treatment'), value=c("mean_THC"))
data_summary_2_subset_spread$Fold_Change = data_summary_2_subset_spread$Infection / data_summary_2_subset_spread$'No Infection'
data_summary_2_subset_spread

## Sheet: Figure 5C - IntensityCalibrati
Figure 5C Intensity Calibration - Measurments in cell with no primary antibody to set fluorescence intesity threshold
Cell	Area	Mean	Max	Major
1	84.248	938.629	1048	11.027
2	54.506	944.548	1017	8.467
3	86.475	1052.39	1193	11.282
4	38.39	973.42	1051	7.392
5	63.743	1021.38	1141	9.009
6	70.032	1001.05	1143	10.513
7	75.731	1014.92	1091	11.741
8	88.179	986.912	1103	11.513
9	54.375	898.698	989	8.736
10	95.385	908.74	973	11.28
11	51.23	921.624	978	8.448
12	62.695	999.273	1098	9.457
13	82.807	1036.98	1153	10.268
14	68.918	1035.58	1128	9.489
15	41.927	993.97	1073	7.456
16	350.356	1375.62	1698	21.512
17	41.796	1018.25	1087	7.935
18	53.982	965.613	1050	9.215
19	115.694	908.456	1036	12.802
20	72.063	861.315	953	10.22
21	64.725	983.707	1085	9.22
22	68.984	963.597	1045	11.031
23	40.355	957.279	1026	7.168
24	37.735	917.215	974	7.154
25	70.491	948.909	1018	11.288
26	101.412	960.946	1078	12.336
27	102.984	904.033	1002	12.802
28	289.627	863.886	1003	19.72
29	57.781	778.31	844	8.697
30	47.561	950.488	1032	7.928
31	56.406	992.127	1109	8.475
32	47.823	1010.97	1174	8.751
33	281.962	1143.82	1346	19.48
34	47.561	933.72	1006	7.928
35	71.932	840.961	903	10.528
36	325.789	857.576	965	25.954
37	29.349	859.71	910	6.113
38	70.753	742.163	805	9.745
39	49.068	1030.17	1111	7.904
40	134.43	1057.67	1177	15.864
41	60.533	937.536	1008	9.45
42	40.355	937.321	1035	7.168
43	38.39	945.951	1039	7.392
44	74.29	981.978	1049	11.847
45	67.018	1060.18	1148	9.491
46	349.374	885.54	981	22.987
47	259.098	681.861	753	22.52
48	115.956	867.116	1014	15.943
49	85.886	973.396	1054	11.074
50	176.095	830.727	906	15.362
51	103.836	772.611	881	12.02
52	88.31	790.858	902	10.963
53	280.914	716.737	774	21.495
54	86.737	755.128	814	12.307
55	46.579	788.986	847	7.951
56	289.365	795.987	882	20.238
57	57.912	778.206	860	9.227
58	66.822	764.84	833	9.224
59	57.912	726.977	773	8.967
60	141.636	777.817	851	14.078
61	72.325	745.67	828	10.009
62	101.281	729.397	814	11.977
63	80.71	782.205	853	10.289
64	113.27	809.195	1039	13.1
65	62.629	770.467	841	9.721
66	97.481	724.208	787	11.258
67	54.375	745.933	821	9.007
68	28.432	733.224	781	6.416
69	82.741	695.208	758	10.539
70	51.099	696.133	768	8.175
71	76.125	669.4	738	9.954
72	84.641	758.163	836	10.538
73	57.781	760.382	870	8.697
74	57.781	726.332	781	8.697
75	66.756	740.39	805	10.016
76	90.406	746.732	808	11.236
77	90.406	753.485	822	11.236
78	95.385	767.225	846	11.28
79	81.955	749.185	812	11.009
80	109.011	683.996	744	12.292
81	84.641	682.542	767	10.538
82	68.787	679.521	747	10.028
83	47.561	613.446	672	7.928
84	56.34	638.484	724	8.753
85	45.072	609.949	661	7.997
86	40.355	616.839	664	7.168
87	303.057	699.398	767	34.16
88	238.004	687.368	807	20.156
89	483.803	709.723	803	27.166
90	0.066	758	758	0.289
91	867.046	785.05	884	41.636
92	56.34	742.399	808	9.279
93	82.545	728.96	922	10.784
1	95.385	847.054	903	11.28
2	62.695	862.282	940	9.457
3	78.679	867.065	940	10.009
4	73.635	811.117	867	9.683
5	194.439	767.045	831	16.384
6	122.965	857.893	949	13.576
7	129.123	854.253	929	13.063
8	181.991	816.291	901	15.598
9	46.906	813.047	865	7.728
10	114.121	769.962	822	13.818
11	92.371	768.86	836	11.777
12	46.382	829.603	887	8.222
13	38.39	818.71	875	7.392
14	70.228	800.543	853	10.258
15	52.868	812.667	868	8.444
16	88.703	788.621	855	10.736
17	120.279	744.851	824	13.311
18	68.918	820.046	878	9.489
19	324.283	894.408	985	21.798
20	122.245	817.821	871	14.824
21	56.995	828.039	882	9.764
22	56.34	831.305	889	8.753
23	91.454	836.647	902	10.791
24	812.213	741.706	806	41.21
25	161.552	777.885	834	18.315
26	482.821	849.296	932	28.008
27	72.325	792.437	841	10.009
28	59.747	797.889	849	8.722
29	55.619	830.001	896	9.503
30	56.34	843.69	901	8.753
31	78.155	885.095	991	10.495
32	54.375	817.796	868	9.007
33	141.898	834.414	902	13.825
34	51.099	737.527	785	8.175
35	60.795	686.955	735	10.765
36	154.411	788.312	851	17.727
37	76.518	824.258	917	10.258
38	40.355	523.75	571	7.168
39	294.278	520.933	645	21.513
40	97.612	534.728	583	11.815
41	91.454	499.054	539	10.791
42	74.159	561.475	621	10.236
43	80.71	541.884	587	10.289
44	73.57	491.317	545	10.458
45	46.579	531.862	580	7.951
46	49.33	537.207	598	8.437
47	88.572	541.172	606	11.303
48	36.424	531.468	570	7.208
49	28.432	518.426	558	6.416
50	57.912	516.364	586	9.227
51	130.63	536.341	594	13.809
52	101.543	520.923	570	11.749
53	186.25	522.515	569	18.598
54	92.371	549.106	612	11.777
55	131.285	582.337	643	13.34
56	70.753	481.112	522	9.745
57	47.692	487.924	530	8.434
58	47.561	486.077	526	7.928
59	46.579	525.795	578	7.951
60	47.561	500.748	559	7.928
61	59.485	537.682	586	9.222
62	52.868	567.349	667	8.444
63	85.951	536.766	597	10.678
64	57.912	546.313	614	8.967
65	82.741	565.756	640	10.539
66	70.753	489.942	528	9.745
67	95.385	506.01	570	11.28
68	115.825	526.305	603	13.359

## Sheet: Figure 5C - SizeCalibration
Figure 5C Size Calibration - Measurments in indentifiable lamellocytes to set size threshold
Area	Mean	Max	Major
597.728	929.692	2263	33.285
660.095	719.166	1589	36.826
229.094	1720.6	3310	33.39
1256.45	808.258	1787	51.658
325.724	685.321	1015	22.642
418.357	991.889	1952	26.639
241.017	934.572	1601	20.217
399.555	1021.35	2065	24.344
576.764	1253.26	3151	58.317
770.744	1039.64	2127	39.411
1422.19	1014.23	2176	48.991
229.356	1545.53	2102	29.366

## Sheet: Figure 5C _Raw Data
Figure 5C - Measurments of atilla staining intesity and cell size in cells
Picture_Date	Selection_Regime	Line	Treatment	Slide_Well	Area	Mean	Max	Major
2020_01_21	No Parasitism	C1	No Infection	s1w2	41.796	603.11	770	7.935
2020_01_21	No Parasitism	C1	No Infection	s1w2	27.515	673.74	822	6.144
2020_01_21	No Parasitism	C1	No Infection	s1w2	59.419	682.669	1041	9.52
2020_01_21	No Parasitism	C1	No Infection	s1w2	35.376	684.9	801	6.711
2020_01_21	No Parasitism	C1	No Infection	s1w2	29.349	695.022	830	6.113
2020_01_21	No Parasitism	C1	No Infection	s1w2	37.8	611.553	705	7.483
2020_01_21	No Parasitism	C1	No Infection	s1w2	100.102	556.723	640	11.29
2020_01_21	No Parasitism	C1	No Infection	s1w2	40.028	529.404	652	7.399
2020_01_21	No Parasitism	C1	No Infection	s1w2	47.823	589.893	696	8.751
2020_01_21	No Parasitism	C1	No Infection	s1w2	70.556	583.98	661	9.996
2020_01_21	No Parasitism	C1	No Infection	s1w2	18.409	569.11	647	5.388
2020_01_21	No Parasitism	C1	No Infection	s1w2	36.752	512.624	590	7.912
2020_01_21	No Parasitism	C1	No Infection	s1w2	45.203	576.175	671	7.714
2020_01_21	No Parasitism	C1	No Infection	s1w2	56.34	594.308	685	8.753
2020_01_21	No Parasitism	C1	No Infection	s1w2	79.924	620.357	858	11.025
2020_01_21	No Parasitism	C1	No Infection	s1w2	64.463	642.206	842	10.008
2020_01_21	No Parasitism	C1	No Infection	s1w2	54.506	637.25	698	8.467
2020_01_21	No Parasitism	C1	No Infection	s1w2	36.555	701.982	815	6.991
2020_01_21	No Parasitism	C1	No Infection	s1w2	33.28	603.187	691	6.888
2020_01_21	No Parasitism	C1	No Infection	s1w2	40.028	622.489	700	7.399
2020_01_21	No Parasitism	C1	No Infection	s1w2	88.179	606.895	693	11.513
2020_01_21	No Parasitism	C1	No Infection	s1w2	96.302	603.852	690	12.578
2020_01_21	No Parasitism	C1	No Infection	s1w2	33.673	663.387	761	6.658
2020_01_21	No Parasitism	C1	No Infection	s1w2	51.623	614.338	745	10.23
2020_01_21	No Parasitism	C1	No Infection	s1w2	37.8	704.229	831	6.937
2020_01_21	No Parasitism	C1	No Infection	s1w2	33.673	755.019	1074	6.658
2020_01_21	No Parasitism	C1	No Infection	s1w2	40.355	679.024	786	7.168
2020_01_21	No Parasitism	C1	No Infection	s1w2	51.099	801.463	933	8.175
2020_01_21	No Parasitism	C1	No Infection	s1w2	68.918	688.273	865	9.489
2020_01_21	No Parasitism	C1	No Infection	s1w2	77.631	691.928	802	11
2020_01_21	No Parasitism	C1	No Infection	s1w2	115.3	654.202	1062	13.011
2020_01_21	No Parasitism	C1	No Infection	s1w2	97.481	606.72	1202	11.258
2020_01_21	No Parasitism	C1	No Infection	s1w2	70.556	589.319	750	9.996
2020_01_21	No Parasitism	C1	No Infection	s1w2	167.71	592.61	701	15.384
2020_01_21	No Parasitism	C1	No Infection	s1w2	136.002	564.044	767	13.268
2020_01_21	No Parasitism	C1	No Infection	s1w2	61.45	631.455	877	8.955
2020_01_21	No Parasitism	C1	No Infection	s1w2	88.31	595.181	754	10.963
2020_01_21	No Parasitism	C1	No Infection	s1w2	55.619	614.314	699	9.503
2020_01_21	No Parasitism	C1	No Infection	s1w2	47.561	765.632	1052	7.928
2020_01_21	No Parasitism	C1	No Infection	s1w2	25.156	664.531	846	5.66
2020_01_21	No Parasitism	C1	No Infection	s1w2	72.456	514.688	630	9.77
2020_01_21	No Parasitism	C1	No Infection	s1w2	37.735	438.102	490	7.154
2020_01_21	No Parasitism	C1	No Infection	s1w2	29.349	481.886	547	6.113
2020_01_21	No Parasitism	C1	No Infection	s1w2	60.533	511.173	642	9.45
2020_01_21	No Parasitism	C1	No Infection	s1w2	65.446	486.26	582	10.476
2020_01_21	No Parasitism	C1	No Infection	s1w2	106.522	578.413	707	11.755
2020_01_21	No Parasitism	C1	No Infection	s1w2	48.479	557.474	685	11.988
2020_01_21	No Parasitism	C1	No Infection	s1w2	51.23	571.031	713	8.448
2020_01_21	No Parasitism	C1	No Infection	s1w2	111.697	561.833	708	13.56
2020_01_21	No Parasitism	C1	No Infection	s1w2	51.099	622.246	750	8.175
2020_01_21	No Parasitism	C1	No Infection	s1w2	62.629	625.124	741	9.721
2020_01_21	No Parasitism	C1	No Infection	s1w2	112.942	612.632	870	13.337
2020_01_21	No Parasitism	C1	No Infection	s1w2	52.868	501.959	611	8.444
2020_01_21	No Parasitism	C1	No Infection	s1w2	36.162	513.054	629	7.42
2020_01_21	No Parasitism	C1	No Infection	s1w2	81.955	588.592	718	11.009
2020_01_21	No Parasitism	C1	No Infection	s1w2	46.579	593.298	705	7.951
2020_01_21	No Parasitism	C1	No Infection	s1w2	40.355	639.955	716	7.168
2020_01_21	No Parasitism	C1	No Infection	s1w2	128.337	451.243	552	13.564
2020_01_21	No Parasitism	C1	No Infection	s1w2	57.912	544.038	662	9.227
2020_01_21	No Parasitism	C1	No Infection	s1w2	118.117	543.95	732	13.039
2020_01_21	No Parasitism	C1	No Infection	s1w2	55.554	533.43	593	10.23
2020_01_21	No Parasitism	C1	No Infection	s1w2	68.787	531.24	654	10.028
2020_01_21	No Parasitism	C1	No Infection	s1w2	32.035	574.104	656	6.962
2020_01_21	No Parasitism	C1	No Infection	s1w2	47.823	505.684	669	8.751
2020_01_21	No Parasitism	C1	No Infection	s1w2	51.23	594.372	767	8.448
2020_01_21	No Parasitism	C1	No Infection	s1w2	73.57	541.642	1177	11.06
2020_01_21	No Parasitism	C1	No Infection	s1w2	56.34	499.85	561	8.753
2020_01_21	No Parasitism	C1	No Infection	s1w2	30.921	500.123	608	6.384
2020_01_21	No Parasitism	C1	No Infection	s1w2	54.375	512.701	620	8.736
2020_01_21	No Parasitism	C1	No Infection	s1w2	46.906	648.797	811	7.728
2020_01_21	No Parasitism	C1	No Infection	s1w2	45.269	578.446	659	8.98
2020_01_21	No Parasitism	C1	No Infection	s1w2	38.39	584.594	735	7.392
2020_01_21	No Parasitism	C1	No Infection	s1w2	36.555	632.489	733	6.991
2020_01_21	No Parasitism	C1	No Infection	s1w2	72.325	635.382	776	10.009
2020_01_21	No Parasitism	C1	No Infection	s1w2	61.45	785.422	986	8.955
2020_01_21	No Parasitism	C1	No Infection	s1w2	38.783	843.105	1005	7.164
2020_01_21	No Parasitism	C1	No Infection	s1w2	47.758	728.433	923	10.519
2020_01_21	No Parasitism	C1	No Infection	s1w2	46.186	696.399	827	7.946
2020_01_21	No Parasitism	C1	No Infection	s1w2	36.555	541.33	616	6.991
2020_01_21	No Parasitism	C1	No Infection	s1w2	66.756	639.58	824	10.016
2020_01_21	No Parasitism	C1	No Infection	s1w2	65.119	614.957	756	9.517
2020_01_21	No Parasitism	C1	No Infection	s1w2	40.028	736.293	847	7.399
2020_01_21	No Parasitism	C1	No Infection	s1w2	33.673	755.895	870	6.658
2020_01_21	No Parasitism	C1	No Infection	s1w2	60.664	665.325	870	9.732
2020_01_21	No Parasitism	C1	No Infection	s1w2	120.803	560.686	687	12.552
2020_01_21	No Parasitism	C1	No Infection	s1w2	32.232	812.817	1056	6.657
2020_01_21	No Parasitism	C1	No Infection	s1w2	78.09	580.659	710	10.792
2020_01_21	No Parasitism	C1	No Infection	s1w2	40.028	490.62	567	7.399
2020_01_21	No Parasitism	C1	No Infection	s1w2	40.028	520.728	621	7.399
2020_01_21	No Parasitism	C1	Infection	s1w10	40.093	890.958	1067	7.663
2020_01_21	No Parasitism	C1	Infection	s1w10	74.356	861.544	959	10.023
2020_01_21	No Parasitism	C1	Infection	s1w10	59.681	888.407	1131	8.938
2020_01_21	No Parasitism	C1	Infection	s1w10	111.239	890.145	1076	15.559
2020_01_21	No Parasitism	C1	Infection	s1w10	117.724	971.042	1198	15.291
2020_01_21	No Parasitism	C1	Infection	s1w10	179.502	1000.38	1167	20.886
2020_01_21	No Parasitism	C1	Infection	s1w10	308.691	989.95	1235	24.35
2020_01_21	No Parasitism	C1	Infection	s1w10	103.05	941.45	1106	16.335
2020_01_21	No Parasitism	C1	Infection	s1w10	117.528	1218.38	1718	14.364
2020_01_21	No Parasitism	C1	Infection	s1w10	84.444	1051.36	1390	12.64
2020_01_21	No Parasitism	C1	Infection	s1w10	56.34	940.401	1075	8.753
2020_01_21	No Parasitism	C1	Infection	s1w10	56.34	913.828	975	8.753
2020_01_21	No Parasitism	C1	Infection	s1w10	47.955	901.963	1021	8.223
2020_01_21	No Parasitism	C1	Infection	s1w10	61.45	891.249	1042	8.955
2020_01_21	No Parasitism	C1	Infection	s1w10	72.063	888.621	952	10.22
2020_01_21	No Parasitism	C1	Infection	s1w10	103.377	971.056	1106	15.623
2020_01_21	No Parasitism	C1	Infection	s1w10	234.859	961.113	1151	20.08
2020_01_21	No Parasitism	C1	Infection	s1w10	111.173	1036.43	1243	15.763
2020_01_21	No Parasitism	C1	Infection	s1w10	285.762	1024.38	1287	22.345
2020_01_21	No Parasitism	C1	Infection	s1w10	461.66	1039.97	1316	25.976
2020_01_21	No Parasitism	C1	Infection	s1w10	166.793	1261.15	1767	19.869
2020_01_21	No Parasitism	C1	Infection	s1w10	47.561	910.402	1005	7.928
2020_01_21	No Parasitism	C1	Infection	s1w10	41.796	837.729	898	7.67
2020_01_21	No Parasitism	C1	Infection	s1w10	47.561	845.229	1027	7.928
2020_01_21	No Parasitism	C1	Infection	s1w10	82.021	969.18	1324	11.311
2020_01_21	No Parasitism	C1	Infection	s1w10	65.119	781.604	853	9.517
2020_01_21	No Parasitism	C1	Infection	s1w10	80.317	802.536	889	10.512
2020_01_21	No Parasitism	C1	Infection	s1w10	140.784	883.989	1080	15.576
2020_01_21	No Parasitism	C1	Infection	s1w10	139.409	823.383	1049	13.323
2020_01_21	No Parasitism	C1	Infection	s1w10	81.955	837.056	940	11.009
2020_01_21	No Parasitism	C1	Infection	s1w10	93.158	796.404	888	11.051
2020_01_21	No Parasitism	C1	Infection	s1w10	88.703	739.47	875	10.736
2020_01_21	No Parasitism	C1	Infection	s1w10	50.706	782.13	865	8.673
2020_01_21	No Parasitism	C1	Infection	s1w10	66.036	779.118	846	10.275
2020_01_21	No Parasitism	C1	Infection	s1w10	76.518	751.354	933	10.258
2020_01_21	No Parasitism	C1	Infection	s1w10	96.433	797.188	890	14.416
2020_01_21	No Parasitism	C1	Infection	s1w10	61.45	808.284	885	8.955
2020_01_21	No Parasitism	C1	Infection	s1w10	60.795	930.627	1084	9.189
2020_01_21	No Parasitism	C1	Infection	s1w10	49.33	827.019	941	8.437
2020_01_21	No Parasitism	C1	Infection	s1w10	59.681	977.443	1092	8.938
2020_01_21	No Parasitism	C1	Infection	s1w10	47.692	850.496	963	8.434
2020_01_21	No Parasitism	C1	Infection	s1w10	45.072	871.6	930	7.997
2020_01_21	No Parasitism	C1	Infection	s1w10	76.256	853.363	948	10.522
2020_01_21	No Parasitism	C1	Infection	s1w10	79.007	995.966	1145	11.54
2020_01_21	No Parasitism	C1	Infection	s1w10	135.74	1000.15	1436	14.324
2020_01_21	No Parasitism	C1	Infection	s1w10	41.927	1063.02	1226	7.456
2020_01_21	No Parasitism	C1	Infection	s1w10	71.67	964.306	1093	10.782
2020_01_21	No Parasitism	C1	Infection	s1w10	68.132	894.069	998	10.546
2020_01_21	No Parasitism	C1	Infection	s1w10	47.955	914.198	1017	8.223
2020_01_21	No Parasitism	C1	Infection	s1w10	195.945	1279.02	2126	18.268
2020_01_21	No Parasitism	C1	Infection	s1w10	72.456	891.675	985	11.864
2020_01_21	No Parasitism	C1	Infection	s1w10	165.286	971.172	1222	17.281
2020_01_21	No Parasitism	C1	Infection	s1w10	53.195	948.523	1042	8.23
2020_01_21	No Parasitism	C1	Infection	s1w10	111.697	863.581	1232	13.56
2020_01_21	No Parasitism	C1	Infection	s1w10	57.65	775.914	871	10.803
2020_01_21	No Parasitism	C1	Infection	s1w10	53.195	772.961	926	9.85
2020_01_21	No Parasitism	C1	Infection	s1w10	88.179	806.188	871	11.513
2020_01_21	No Parasitism	C1	Infection	s1w10	88.703	807.415	917	10.736
2020_01_21	No Parasitism	C1	Infection	s1w10	101.281	818.675	901	11.977
2020_01_21	No Parasitism	C1	Infection	s1w10	181.86	952.81	1099	17.378
2020_01_21	No Parasitism	C1	Infection	s1w10	150.153	817.129	942	13.827
2020_01_21	No Parasitism	C1	Infection	s1w10	37.735	894.915	970	7.154
2020_01_21	No Parasitism	C1	Infection	s1w10	1502.12	1125.27	1771	53.868
2020_01_21	No Parasitism	C1	Infection	s1w10	68.918	869.527	1074	9.489
2020_01_21	No Parasitism	C1	Infection	s1w10	68.787	898.09	999	9.704
2020_01_21	No Parasitism	C1	Infection	s1w10	98.857	928.698	1022	15.979
2020_01_21	No Parasitism	C1	Infection	s1w10	177.34	974.541	1262	18.773
2020_01_21	No Parasitism	C1	Infection	s1w10	70.753	909.193	1119	9.745
2020_01_21	No Parasitism	C1	Infection	s1w10	47.561	877.49	952	7.928
2020_01_21	No Parasitism	C1	Infection	s1w10	332.668	1002.3	1492	26.596
2020_01_21	No Parasitism	C1	Infection	s1w10	278.752	1266.09	1727	25.941
2020_01_21	No Parasitism	C1	Infection	s1w10	64.463	812.674	880	10.008
2020_01_21	No Parasitism	C1	Infection	s1w10	57.912	942.044	1064	9.227
2020_01_21	No Parasitism	C1	Infection	s1w10	68.132	828.332	984	10.546
2020_01_21	No Parasitism	C1	Infection	s1w10	54.506	868.268	993	8.467
2020_01_21	No Parasitism	C1	Infection	s1w10	33.673	857.78	924	6.658
2020_01_21	No Parasitism	C1	Infection	s1w10	47.692	789.034	848	8.434
2020_01_21	No Parasitism	C1	Infection	s1w10	52.868	817.436	915	8.444
2020_01_21	No Parasitism	C1	Infection	s1w10	40.355	931	1016	7.168
2020_01_21	No Parasitism	C1	Infection	s1w10	54.506	903.37	990	8.467
2020_01_21	No Parasitism	C1	Infection	s1w10	270.17	953.27	1105	20.901
2020_01_21	No Parasitism	C1	Infection	s1w10	41.796	919.21	999	7.67
2020_01_21	No Parasitism	C1	Infection	s1w10	90.406	857.587	1083	11.236
2020_01_21	No Parasitism	C1	Infection	s1w10	40.093	883.077	1017	7.663
2020_01_21	No Parasitism	C1	Infection	s1w10	35.507	951.899	1135	7.704
2020_01_21	No Parasitism	C1	Infection	s1w10	53.982	742.391	849	9.215
2020_01_21	No Parasitism	C1	Infection	s1w10	43.565	904.365	980	7.448
2020_01_21	No Parasitism	C1	Infection	s1w10	25.55	828.036	886	6.664
2020_01_21	No Parasitism	C1	Infection	s1w10	213.83	848.316	1110	17.421
2020_01_21	No Parasitism	C1	Infection	s1w10	172.034	958.887	1292	15.749
2020_01_21	No Parasitism	C1	Infection	s1w10	38.783	896.917	1098	7.164
2020_01_21	No Parasitism	C1	Infection	s1w10	45.203	865.249	913	7.714
2020_01_21	No Parasitism	C1	Infection	s1w10	123.686	1197.25	2145	12.793
2020_01_21	No Parasitism	C1	Infection	s1w10	29.611	921.482	998	6.642
2020_01_21	No Parasitism	C1	Infection	s1w10	129.451	858.938	935	12.838
2020_01_21	No Parasitism	C1	Infection	s1w10	76.649	869.266	950	14.479
2020_01_21	No Parasitism	C1	Infection	s1w10	111.566	819.553	1013	17.645
2020_01_21	No Parasitism	C1	Infection	s1w10	155.197	856.659	978	14.549
2020_01_21	No Parasitism	C1	Infection	s1w10	41.403	863.272	940	8.228
2020_01_21	No Parasitism	C1	Infection	s1w10	56.406	833.152	892	8.475
2020_01_21	No Parasitism	C1	Infection	s1w10	313.342	897.476	1041	20.232
2020_01_21	No Parasitism	C1	Infection	s1w10	175.964	848.86	954	15.092
2020_01_21	No Parasitism	C1	Infection	s1w10	145.436	924.495	1078	18.972
2020_01_21	No Parasitism	C1	Infection	s1w10	134.233	966.208	1088	17.776
2020_01_21	No Parasitism	C1	Infection	s1w10	41.927	895.259	1137	7.456
2020_01_21	No Parasitism	C1	Infection	s1w10	56.34	945.664	1026	8.753
2020_01_21	No Parasitism	C1	Infection	s1w10	83.396	932.723	1042	12.569
2020_01_21	No Parasitism	C1	Infection	s1w10	359.724	1068.45	1640	32.122
2020_01_21	No Parasitism	C1	Infection	s1w10	609.258	1329.74	2402	41.79
2020_01_21	No Parasitism	C1	Infection	s1w10	804.483	1095.44	1349	33.141
2020_01_21	No Parasitism	C1	Infection	s1w10	368.437	1069.53	1757	28.47
2020_01_21	No Parasitism	C1	Infection	s1w10	40.028	807.324	867	7.939
2020_01_21	No Parasitism	C1	Infection	s1w10	62.891	930.722	1116	9.246
2020_01_21	No Parasitism	C1	Infection	s1w10	36.555	918.373	1013	6.991
2020_01_21	No Parasitism	C1	Infection	s1w10	70.556	739.807	826	9.996
2020_01_21	No Parasitism	C1	Infection	s1w10	71.932	747.216	829	10.528
2020_01_21	No Parasitism	C1	Infection	s1w10	61.908	694.335	746	9.94
2020_01_21	No Parasitism	C1	Infection	s1w10	52.082	723.603	786	8.943
2020_01_21	No Parasitism	C1	Infection	s1w10	40.617	751.884	874	8.43
2020_01_21	No Parasitism	C1	Infection	s1w10	208.982	1041.16	1751	29.715
2020_01_21	No Parasitism	C1	Infection	s1w10	59.681	785.258	847	8.938
2020_01_21	No Parasitism	C1	Infection	s1w10	68.918	787.952	867	9.489
2020_01_21	No Parasitism	C1	Infection	s1w10	324.152	1315.39	1618	28.129
2020_01_21	No Parasitism	C1	Infection	s1w10	247.634	990.986	1735	24.42
2020_01_21	No Parasitism	C1	Infection	s1w10	36.097	1041.39	1182	8.084
2020_01_21	No Parasitism	C1	Infection	s1w10	477.514	945.301	1201	28.381
2020_01_21	No Parasitism	C1	Infection	s1w10	56.34	876.799	946	8.753
2020_01_21	No Parasitism	C1	Infection	s1w10	88.703	907.502	1026	10.736
2020_01_21	No Parasitism	C1	Infection	s1w10	132.923	925.422	1032	14.654
2020_01_21	No Parasitism	C1	Infection	s1w10	562.221	1013.8	2124	30.323
2020_01_21	No Parasitism	C1	Infection	s1w10	56.34	983.702	1188	9.279
2020_01_21	No Parasitism	C1	Infection	s1w10	511.384	956.611	1246	30.2
2020_01_21	No Parasitism	C1	Infection	s1w10	144.977	1067.74	1645	14.567
2020_01_21	No Parasitism	C1	Infection	s1w10	225.819	889.89	1767	26.244
2020_01_21	No Parasitism	C1	Infection	s1w10	127.093	822.932	897	14.344
2020_01_21	No Parasitism	C1	Infection	s1w10	68.132	812.679	880	10.243
2020_01_21	No Parasitism	C1	Infection	s1w10	62.891	759.243	906	9.246
2020_01_21	No Parasitism	C1	Infection	s1w10	56.34	820.981	969	8.753
2020_01_21	No Parasitism	C1	Infection	s1w10	61.908	850.016	931	9.94
2020_01_21	No Parasitism	C1	Infection	s1w10	79.924	889.716	1004	11.025
2020_01_21	No Parasitism	C1	Infection	s1w10	60.533	853.775	921	9.45
2020_01_21	No Parasitism	C1	Infection	s1w10	57.781	918.117	1254	8.697
2020_01_21	No Parasitism	C1	Infection	s1w10	71.932	960.674	1282	10.528
2020_01_21	No Parasitism	C1	Infection	s1w10	47.561	869.299	990	7.928
2020_01_21	No Parasitism	C1	Infection	s1w10	46.382	866.425	988	8.222
2020_01_21	No Parasitism	C1	Infection	s1w10	90.406	818.759	891	11.236
2020_01_21	No Parasitism	C1	Infection	s1w10	46.382	810.425	866	8.222
2020_01_21	No Parasitism	C1	Infection	s1w10	46.906	815.73	899	7.728
2020_01_21	No Parasitism	C1	Infection	s1w10	86.017	773.966	957	10.465
2020_01_21	No Parasitism	C1	Infection	s1w10	150.153	792.251	869	14.364
2020_01_21	No Parasitism	C1	Infection	s1w10	49.33	789.507	855	8.437
2020_01_21	No Parasitism	C1	Infection	s1w10	37.211	707.361	767	7.711
2020_01_21	High Parasitism	NSRef-1	Infection	s4w10	76.78	544.608	613	11.269
2020_01_21	High Parasitism	NSRef-1	Infection	s4w10	56.34	546.615	663	8.753
2020_01_21	High Parasitism	NSRef-1	Infection	s4w10	84.641	678.194	852	10.538
2020_01_21	High Parasitism	NSRef-1	Infection	s4w10	37.8	570.43	612	6.937
2020_01_21	High Parasitism	NSRef-1	Infection	s4w10	63.743	594.483	643	9.009
2020_01_21	High Parasitism	NSRef-1	Infection	s4w10	89.882	639.747	835	11.792
2020_01_21	High Parasitism	NSRef-1	Infection	s4w10	158.145	686.414	810	14.824
2020_01_21	High Parasitism	NSRef-1	Infection	s4w10	527.238	656.721	887	34.652
2020_01_21	High Parasitism	NSRef-1	Infection	s4w10	792.691	635.97	1075	34.941
2020_01_21	High Parasitism	NSRef-1	Infection	s4w10	54.375	696.484	1060	8.736
2020_01_21	High Parasitism	NSRef-1	Infection	s4w10	72.456	635.19	681	9.77
2020_01_21	High Parasitism	NSRef-1	Infection	s4w10	43.565	651.519	697	7.448
2020_01_21	High Parasitism	NSRef-1	Infection	s4w10	95.188	642.834	770	11.552
2020_01_21	High Parasitism	NSRef-1	Infection	s4w10	33.28	638.081	683	6.888
2020_01_21	High Parasitism	NSRef-1	Infection	s4w10	41.796	653.627	703	7.67
2020_01_21	High Parasitism	NSRef-1	Infection	s4w10	70.556	663.603	1058	9.996
2020_01_21	High Parasitism	NSRef-1	Infection	s4w10	78.155	687.239	778	10.495
2020_01_21	High Parasitism	NSRef-1	Infection	s4w10	158.145	667.797	741	14.824
2020_01_21	High Parasitism	NSRef-1	Infection	s4w10	231.387	670.8	805	17.929
2020_01_21	High Parasitism	NSRef-1	Infection	s4w10	54.375	650.225	896	8.736
2020_01_21	High Parasitism	NSRef-1	Infection	s4w10	207.606	687.12	779	20.984
2020_01_21	High Parasitism	NSRef-1	Infection	s4w10	60.86	691.069	763	10.913
2020_01_21	High Parasitism	NSRef-1	Infection	s4w10	971.537	719.799	1116	61.046
2020_01_21	High Parasitism	NSRef-1	Infection	s4w10	499.264	761.143	1081	40.491
2020_01_21	High Parasitism	NSRef-1	Infection	s4w10	116.414	686.46	833	13.296
2020_01_21	High Parasitism	NSRef-1	Infection	s4w10	182.777	592.832	681	21.223
2020_01_21	High Parasitism	NSRef-1	Infection	s4w10	332.406	738.751	1094	39.534
2020_01_21	High Parasitism	NSRef-1	Infection	s4w10	109.208	752.273	974	26.961
2020_01_21	High Parasitism	NSRef-1	Infection	s4w10	47.823	549.226	590	8.751
2020_01_21	High Parasitism	NSRef-1	Infection	s4w10	50.051	513.41	563	8.928
2020_01_21	High Parasitism	NSRef-1	Infection	s4w10	87.393	509.737	559	11.747
2020_01_21	High Parasitism	NSRef-1	Infection	s4w10	88.31	576.45	878	10.963
2020_01_21	High Parasitism	NSRef-1	Infection	s4w10	51.099	585.768	626	8.175
2020_01_21	High Parasitism	NSRef-1	Infection	s4w10	48.479	576.078	645	9.246
2020_01_21	High Parasitism	NSRef-1	Infection	s4w10	51.296	535.53	584	9.325
2020_01_21	High Parasitism	NSRef-1	Infection	s4w10	138.492	572.908	989	14.666
2020_01_21	High Parasitism	NSRef-1	Infection	s4w10	573.816	656.837	1063	34.013
2020_01_21	High Parasitism	NSRef-1	Infection	s4w10	341.774	666.338	1090	22.433
2020_01_21	High Parasitism	NSRef-1	Infection	s4w10	626.095	645.297	948	38.932
2020_01_21	High Parasitism	NSRef-1	Infection	s4w10	1126.67	705.297	936	48.063
2020_01_21	High Parasitism	NSRef-1	Infection	s4w10	139.278	762.197	882	18.323
2020_01_21	High Parasitism	NSRef-1	Infection	s4w10	241.476	802.073	1001	33.894
2020_01_21	High Parasitism	NSRef-1	Infection	s4w10	424.188	753.505	1021	33.233
2020_01_21	High Parasitism	NSRef-1	Infection	s4w10	667.957	727.098	964	43.263
2020_01_21	High Parasitism	NSRef-1	Infection	s4w10	869.077	690.895	1144	41.49
2020_01_21	High Parasitism	NSRef-1	Infection	s4w10	314.521	639.91	1021	21.867
2020_01_21	High Parasitism	NSRef-1	Infection	s4w10	188.87	645.108	1010	24.568
2020_01_21	High Parasitism	NSRef-1	Infection	s4w10	711.915	624.954	1182	31.616
2020_01_21	High Parasitism	NSRef-1	Infection	s4w10	143.47	545.103	591	17.257
2020_01_21	High Parasitism	NSRef-1	Infection	s4w10	32.232	539.965	594	6.657
2020_01_21	High Parasitism	NSRef-1	Infection	s4w10	123.489	562.928	629	13.045
2020_01_21	High Parasitism	NSRef-1	Infection	s4w10	136.002	577.075	628	14.087
2020_01_21	High Parasitism	NSRef-1	Infection	s4w10	33.673	571.177	844	6.658
2020_01_21	High Parasitism	NSRef-1	Infection	s4w10	47.561	608.534	664	7.928
2020_01_21	High Parasitism	NSRef-1	Infection	s4w10	45.203	613.11	683	7.714
2020_01_21	High Parasitism	NSRef-1	Infection	s4w10	62.629	587.947	636	9.721
2020_01_21	High Parasitism	NSRef-1	Infection	s4w10	476.073	690.533	1076	32.222
2020_01_21	High Parasitism	NSRef-1	Infection	s4w10	791.053	686.561	1186	46.636
2020_01_21	High Parasitism	NSRef-1	Infection	s4w10	41.796	547.912	586	7.67
2020_01_21	High Parasitism	NSRef-1	Infection	s4w10	56.34	541.644	592	8.753
2020_01_21	High Parasitism	NSRef-1	Infection	s4w10	54.506	546.04	588	8.467
2020_01_21	High Parasitism	NSRef-1	Infection	s4w10	51.885	530.727	605	9.199
2020_01_21	High Parasitism	NSRef-1	Infection	s4w10	30.79	524.996	600	6.672
2020_01_21	High Parasitism	NSRef-1	Infection	s4w10	1229.39	733.164	1413	55.792
2020_01_21	High Parasitism	NSRef-1	Infection	s4w10	901.112	760.362	1636	48.404
2020_01_21	High Parasitism	NSRef-1	Infection	s4w10	68.787	586.462	675	9.704
2020_01_21	High Parasitism	NSRef-1	Infection	s4w10	341.447	767.54	1477	38.693
2020_01_21	High Parasitism	NSRef-1	Infection	s4w10	61.45	707.83	953	8.955
2020_01_21	High Parasitism	NSRef-1	Infection	s4w10	40.355	760.683	1036	7.168
2020_01_21	High Parasitism	NSRef-1	Infection	s4w10	57.781	540.126	586	8.697
2020_01_21	High Parasitism	NSRef-1	Infection	s4w10	37.735	606.611	715	7.154
2020_01_21	High Parasitism	NSRef-1	Infection	s4w10	95.385	557.098	723	11.28
2020_01_21	High Parasitism	NSRef-1	Infection	s4w10	104.295	573.916	651	11.804
2020_01_21	High Parasitism	NSRef-1	Infection	s4w10	594.256	637.676	1097	28.568
2020_01_21	High Parasitism	NSRef-1	Infection	s4w10	34.787	643.435	744	7.43
2020_01_21	High Parasitism	NSRef-1	Infection	s4w10	67.084	571.93	841	9.751
2020_01_21	High Parasitism	NSRef-1	Infection	s4w10	54.506	616.831	689	8.467
2020_01_21	High Parasitism	NSRef-1	Infection	s4w10	120.803	623.977	711	12.552
2020_01_21	High Parasitism	NSRef-1	Infection	s4w10	46.579	600.364	659	7.951
2020_01_21	High Parasitism	NSRef-1	Infection	s4w10	36.555	588.349	632	6.991
2020_01_21	High Parasitism	NSRef-1	Infection	s4w10	29.546	565.155	612	6.4
2020_01_21	High Parasitism	NSRef-1	Infection	s4w10	35.049	669.221	739	6.948
2020_01_21	High Parasitism	NSRef-1	Infection	s4w10	45.203	652.968	717	7.714
2020_01_21	High Parasitism	NSRef-1	Infection	s4w10	62.891	608.735	653	9.246
2020_01_21	High Parasitism	NSRef-1	Infection	s4w10	123.489	731.603	1164	12.539
2020_01_21	High Parasitism	NSRef-1	Infection	s4w10	97.612	704.49	3823	11.557
2020_01_21	High Parasitism	NSRef-1	Infection	s4w10	47.955	641.683	727	8.223
2020_01_21	High Parasitism	NSRef-1	Infection	s4w10	189.132	630.905	977	18.097
2020_01_21	High Parasitism	NSRef-1	Infection	s4w10	96.957	579.718	635	13.928
2020_01_21	High Parasitism	NSRef-1	Infection	s4w10	118.445	727.147	933	16.182
2020_01_21	High Parasitism	NSRef-1	Infection	s4w10	424.188	765.032	1191	28.057
2020_01_21	High Parasitism	NSRef-1	Infection	s4w10	175.047	645.429	1384	18.535
2020_01_21	High Parasitism	NSRef-1	Infection	s4w10	93.289	695.395	884	13.002
2020_01_21	High Parasitism	NSRef-1	Infection	s4w10	56.34	641.264	707	8.753
2020_01_21	High Parasitism	NSRef-1	Infection	s4w10	41.927	583.28	632	8.688
2020_01_21	High Parasitism	NSRef-1	Infection	s4w10	153.035	540.044	708	14.601
2020_01_21	High Parasitism	NSRef-1	Infection	s4w10	31.708	519.058	563	7.168
2020_01_21	High Parasitism	NSRef-1	Infection	s4w10	72.456	538.029	656	9.77
2020_01_21	High Parasitism	NSRef-1	Infection	s4w10	111.501	584.015	691	12.059
2020_01_21	High Parasitism	NSRef-1	Infection	s4w10	59.747	566.761	727	8.722
2020_01_21	High Parasitism	NSRef-1	Infection	s4w10	59.485	549.302	613	9.222
2020_01_21	High Parasitism	NSRef-1	Infection	s4w10	66.429	563.798	848	11.007
2020_01_21	High Parasitism	NSRef-1	Infection	s4w10	47.692	555.867	616	8.434
2020_01_21	High Parasitism	NSRef-1	Infection	s4w10	107.439	583.343	632	13.325
2020_01_21	High Parasitism	NSRef-1	Infection	s4w10	123.489	589.668	641	13.045
2020_01_21	High Parasitism	NSRef-1	Infection	s4w10	71.932	578.552	895	10.528
2020_01_21	High Parasitism	NSRef-1	Infection	s4w10	870.912	714.739	1244	37.359
2020_01_21	High Parasitism	NSRef-1	Infection	s4w10	420.323	652.184	896	24.197
2020_01_21	High Parasitism	NSRef-1	Infection	s4w10	1927.81	579.852	1834	55.231
2020_01_21	High Parasitism	NSRef-1	Infection	s4w10	161.683	582.763	723	16.446
2020_01_21	High Parasitism	NSRef-1	Infection	s4w10	102.788	563.636	681	13.324
2020_01_21	High Parasitism	NSRef-1	Infection	s4w10	759.607	616.058	887	42.018
2020_01_21	High Parasitism	NSRef-1	Infection	s4w10	551.411	678.798	1198	29.337
2020_01_21	High Parasitism	NSRef-1	Infection	s4w10	76.714	509.817	575	11.821
2020_01_21	High Parasitism	NSRef-1	Infection	s4w10	141.309	716.574	947	16.643
2020_01_21	High Parasitism	NSRef-1	Infection	s4w10	66.953	684.836	812	12.097
2020_01_21	High Parasitism	NSRef-1	Infection	s4w10	75.6	777.816	1108	19.904
2020_01_21	High Parasitism	NSRef-1	Infection	s4w10	77.173	638.155	754	11.809
2020_01_21	High Parasitism	NSRef-1	Infection	s4w10	61.777	662.102	734	10.215
2020_01_21	High Parasitism	NSRef-1	Infection	s4w10	479.611	609.067	1150	30.908
2020_01_21	High Parasitism	NSRef-1	Infection	s4w10	299.323	588.132	804	28.616
2020_01_21	High Parasitism	NSRef-1	Infection	s4w10	270.76	687.878	976	23.226
2020_01_21	High Parasitism	NSRef-1	Infection	s4w10	54.375	532.123	661	8.736
2020_01_21	High Parasitism	NSRef-1	Infection	s4w10	32.232	620.557	685	6.657
2020_01_21	High Parasitism	NSRef-1	Infection	s4w10	41.403	642.516	749	8.228
2020_01_21	High Parasitism	NSRef-1	Infection	s4w10	29.349	589.949	653	6.113
2020_01_21	High Parasitism	NSRef-1	Infection	s4w10	37.211	599.238	642	7.711
2020_01_21	High Parasitism	NSRef-1	Infection	s4w10	50.051	567.624	608	8.928
2020_01_21	High Parasitism	NSRef-1	Infection	s4w10	38.652	610.092	1103	7.703
2020_01_21	High Parasitism	NSRef-1	Infection	s4w10	27.056	584.564	647	6.373
2020_01_21	High Parasitism	NSRef-1	Infection	s4w11	52.868	545.955	644	8.444
2020_01_21	High Parasitism	NSRef-1	Infection	s4w11	70.556	583.373	729	9.996
2020_01_21	High Parasitism	NSRef-1	Infection	s4w11	32.035	579.436	812	6.962
2020_01_21	High Parasitism	NSRef-1	Infection	s4w11	42.452	573.398	651	8.16
2020_01_21	High Parasitism	NSRef-1	Infection	s4w11	88.31	589.315	683	10.963
2020_01_21	High Parasitism	NSRef-1	Infection	s4w11	72.587	619.936	1265	11.276
2020_01_21	High Parasitism	NSRef-1	Infection	s4w11	145.174	1279.08	1984	17.256
2020_01_21	High Parasitism	NSRef-1	Infection	s4w11	47.561	586.303	655	7.928
2020_01_21	High Parasitism	NSRef-1	Infection	s4w11	102.984	616.767	953	12.802
2020_01_21	High Parasitism	NSRef-1	Infection	s4w11	79.007	567.947	714	11.54
2020_01_21	High Parasitism	NSRef-1	Infection	s4w11	71.932	526.738	620	10.528
2020_01_21	High Parasitism	NSRef-1	Infection	s4w11	127.551	590.977	964	14.109
2020_01_21	High Parasitism	NSRef-1	Infection	s4w11	89.882	558.203	752	11.792
2020_01_21	High Parasitism	NSRef-1	Infection	s4w11	150.153	624.411	805	13.827
2020_01_21	High Parasitism	NSRef-1	Infection	s4w11	103.639	535.813	656	13.875
2020_01_21	High Parasitism	NSRef-1	Infection	s4w11	100.953	516.596	601	13.516
2020_01_21	High Parasitism	NSRef-1	Infection	s4w11	191.753	732.438	901	21.461
2020_01_21	High Parasitism	NSRef-1	Infection	s4w11	776.509	1069.63	1947	46.323
2020_01_21	High Parasitism	NSRef-1	Infection	s4w11	872.615	1294.63	1836	48.694
2020_01_21	High Parasitism	NSRef-1	Infection	s4w11	92.961	1021.84	1269	12.396
2020_01_21	High Parasitism	NSRef-1	Infection	s4w11	684.334	865.527	2707	33.586
2020_01_21	High Parasitism	NSRef-1	Infection	s4w11	62.695	634.797	718	9.457
2020_01_21	High Parasitism	NSRef-1	Infection	s4w11	109.011	749.165	1111	12.292
2020_01_21	High Parasitism	NSRef-1	Infection	s4w11	78.614	676.203	1693	10.226
2020_01_21	High Parasitism	NSRef-1	Infection	s4w11	31.708	593.736	656	7.168
2020_01_21	High Parasitism	NSRef-1	Infection	s4w11	32.035	598.822	661	6.387
2020_01_21	High Parasitism	NSRef-1	Infection	s4w11	68.787	687.616	1195	10.028
2020_01_21	High Parasitism	NSRef-1	Infection	s4w11	342.102	706.794	1095	20.995
2020_01_21	High Parasitism	NSRef-1	Infection	s4w11	99.84	553.081	648	11.766
2020_01_21	High Parasitism	NSRef-1	Infection	s4w11	72.325	534.247	728	10.009
2020_01_21	High Parasitism	NSRef-1	Infection	s4w11	93.158	547.325	621	11.051
2020_01_21	High Parasitism	NSRef-1	Infection	s4w11	62.891	577.557	799	9.246
2020_01_21	High Parasitism	NSRef-1	Infection	s4w11	47.955	541.328	654	8.223
2020_01_21	High Parasitism	NSRef-1	Infection	s4w11	47.561	545.109	668	7.928
2020_01_21	High Parasitism	NSRef-1	Infection	s4w11	59.419	590.41	649	9.52
2020_01_21	High Parasitism	NSRef-1	Infection	s4w11	91.454	572.931	633	10.791
2020_01_21	High Parasitism	NSRef-1	Infection	s4w11	36.555	558.914	623	6.991
2020_01_21	High Parasitism	NSRef-1	Infection	s4w11	36.424	608.874	692	7.208
2020_01_21	High Parasitism	NSRef-1	Infection	s4w11	124.21	563.221	819	14.072
2020_01_21	High Parasitism	NSRef-1	Infection	s4w11	86.999	575.909	793	12.027
2020_01_21	High Parasitism	NSRef-1	Infection	s4w11	73.635	629.185	750	9.683
2020_01_21	High Parasitism	NSRef-1	Infection	s4w11	72.325	540.88	611	10.009
2020_01_21	High Parasitism	NSRef-1	Infection	s4w11	49.068	573.479	651	7.904
2020_01_21	High Parasitism	NSRef-1	Infection	s4w11	40.028	562.511	632	7.939
2020_01_21	High Parasitism	NSRef-1	Infection	s4w11	59.485	591.252	894	9.222
2020_01_21	High Parasitism	NSRef-1	Infection	s4w11	68.787	568.269	792	10.028
2020_01_21	High Parasitism	NSRef-1	Infection	s4w11	95.385	579.736	798	11.28
2020_01_21	High Parasitism	NSRef-1	Infection	s4w11	68.787	579.193	799	9.704
2020_01_21	High Parasitism	NSRef-1	Infection	s4w11	59.681	520.619	629	8.938
2020_01_21	High Parasitism	NSRef-1	Infection	s4w11	24.894	589.318	776	6.169
2020_01_21	High Parasitism	NSRef-1	Infection	s4w11	101.936	611.385	1569	11.528
2020_01_21	High Parasitism	NSRef-1	Infection	s4w11	30.79	557.921	618	6.672
2020_01_21	High Parasitism	NSRef-1	Infection	s4w11	51.099	583.133	658	8.175
2020_01_21	High Parasitism	NSRef-1	Infection	s4w11	56.34	558.892	689	8.753
2020_01_21	High Parasitism	NSRef-1	Infection	s4w11	82.807	537.244	644	10.268
2020_01_21	High Parasitism	NSRef-1	Infection	s4w11	70.556	552.643	638	9.996
2020_01_21	High Parasitism	NSRef-1	Infection	s4w11	73.57	511.805	625	11.06
2020_01_21	High Parasitism	NSRef-1	Infection	s4w11	103.246	518.473	602	12.241
2020_01_21	High Parasitism	NSRef-1	Infection	s4w11	134.626	1167.45	1568	20.528
2020_01_21	High Parasitism	NSRef-1	Infection	s4w11	196.338	895.856	1213	19.671
2020_01_21	High Parasitism	NSRef-1	Infection	s4w11	362.017	940.849	3067	23.368
2020_01_21	High Parasitism	NSRef-1	Infection	s4w11	279.473	792.61	2868	21.054
2020_01_21	High Parasitism	NSRef-1	Infection	s4w11	382.588	682.294	883	23.485
2020_01_21	High Parasitism	NSRef-1	Infection	s4w11	81.627	1200.09	2421	23.222
2020_01_21	High Parasitism	NSRef-1	Infection	s4w11	398.507	1086.11	2136	26.318
2020_01_21	High Parasitism	NSRef-1	Infection	s4w11	289.43	567.153	1096	21.782
2020_01_21	High Parasitism	NSRef-1	Infection	s4w11	186.97	611.8	1452	17.176
2020_01_21	High Parasitism	NSRef-1	Infection	s4w11	147.663	549.531	772	13.879
2020_01_21	High Parasitism	NSRef-1	Infection	s4w11	285.238	532.714	659	20.253
2020_01_21	High Parasitism	NSRef-1	Infection	s4w11	84.641	492.25	578	10.538
2020_01_21	High Parasitism	NSRef-1	Infection	s4w11	68.787	547.024	660	9.704
2020_01_21	High Parasitism	NSRef-1	Infection	s4w11	62.891	495.751	583	9.246
2020_01_21	High Parasitism	NSRef-1	Infection	s4w11	61.45	543.513	897	8.955
2020_01_21	High Parasitism	NSRef-1	Infection	s4w11	157.359	465.344	625	15.629
2020_01_21	High Parasitism	NSRef-1	Infection	s4w11	116.48	507.425	604	12.575
2020_01_21	High Parasitism	NSRef-1	Infection	s4w11	164.303	588.42	678	14.58
2020_01_21	High Parasitism	NSRef-1	Infection	s4w11	60.795	586.339	750	9.189
2020_01_21	High Parasitism	NSRef-1	Infection	s4w11	88.572	706.982	872	11.303
2020_01_21	High Parasitism	NSRef-1	Infection	s4w11	173.213	589.868	725	14.851
2020_01_21	High Parasitism	NSRef-1	Infection	s4w11	84.248	693.103	1044	11.027
2020_01_21	High Parasitism	NSRef-1	Infection	s4w11	168.234	927.175	1331	16.391
2020_01_21	High Parasitism	NSRef-1	Infection	s4w11	169.937	569.311	778	15.638
2020_01_21	High Parasitism	NSRef-1	Infection	s4w11	52.409	548.284	947	8.736
2020_01_21	High Parasitism	NSRef-1	Infection	s4w11	66.822	538.848	769	9.224
2020_01_21	High Parasitism	NSRef-1	Infection	s4w11	76.125	529.095	601	9.954
2020_01_21	High Parasitism	NSRef-1	Infection	s4w11	95.123	646.808	738	11.794
2020_01_21	High Parasitism	NSRef-1	Infection	s4w11	176.685	627.529	780	18.597
2020_01_21	High Parasitism	NSRef-1	Infection	s4w11	38.783	595.365	784	7.164
2020_01_21	High Parasitism	NSRef-1	Infection	s4w11	37.8	570.18	889	6.937
2020_01_21	High Parasitism	NSRef-1	Infection	s4w11	44.548	540.741	625	8.226
2020_01_21	High Parasitism	NSRef-1	Infection	s4w11	101.412	619.185	913	12.336
2020_01_21	High Parasitism	NSRef-1	Infection	s4w11	70.753	708.227	984	9.745
2020_01_21	High Parasitism	NSRef-1	Infection	s4w11	78.09	484.27	605	10.792
2020_01_21	High Parasitism	NSRef-1	Infection	s4w11	38.39	478.531	562	7.392
2020_01_21	High Parasitism	NSRef-1	Infection	s4w11	65.119	464.408	539	9.517
2020_01_21	High Parasitism	NSRef-1	Infection	s4w11	37.735	595.889	671	7.154
2020_01_21	High Parasitism	NSRef-1	Infection	s4w11	105.998	580.021	992	12.513
2020_01_21	High Parasitism	NSRef-1	Infection	s4w11	23.977	557.47	608	5.686
2020_01_21	No Parasitism	C2	No Infection	s2w2	472.077	2362.13	4095	36.07
2020_01_21	No Parasitism	C2	No Infection	s2w2	250.451	2984.72	4095	45.15
2020_01_21	No Parasitism	C2	No Infection	s2w2	84.248	630.657	724	11.027
2020_01_21	No Parasitism	C2	No Infection	s2w2	62.891	527.571	609	9.246
2020_01_21	No Parasitism	C2	No Infection	s2w2	33.673	590.232	682	6.658
2020_01_21	No Parasitism	C2	No Infection	s2w2	89.292	578.615	627	11.995
2020_01_21	No Parasitism	C2	No Infection	s2w2	37.8	659.321	751	6.937
2020_01_21	No Parasitism	C2	No Infection	s2w2	26.074	667.447	736	5.871
2020_01_21	No Parasitism	C2	No Infection	s2w2	82.545	612.835	669	10.784
2020_01_21	No Parasitism	C2	No Infection	s2w2	76.78	619.671	718	11.269
2020_01_21	No Parasitism	C2	No Infection	s2w2	72.456	647.153	736	9.77
2020_01_21	No Parasitism	C2	No Infection	s2w2	56.34	578.345	631	8.753
2020_01_21	No Parasitism	C2	No Infection	s2w2	55.619	506.807	548	9.503
2020_01_21	No Parasitism	C2	No Infection	s2w2	45.203	507.397	573	7.714
2020_01_21	No Parasitism	C2	No Infection	s2w2	38.39	504.949	589	7.392
2020_01_21	No Parasitism	C2	No Infection	s2w2	57.781	529.491	600	8.697
2020_01_21	No Parasitism	C2	No Infection	s2w2	63.743	655.848	764	9.009
2020_01_21	No Parasitism	C2	No Infection	s2w2	52.868	646.352	723	8.444
2020_01_21	No Parasitism	C2	No Infection	s2w2	71.08	621.319	699	9.513
2020_01_21	No Parasitism	C2	No Infection	s2w2	43.762	614.985	656	7.728
2020_01_21	No Parasitism	C2	No Infection	s2w2	38.652	617.536	656	7.703
2020_01_21	No Parasitism	C2	No Infection	s2w2	38.521	538.281	596	7.955
2020_01_21	No Parasitism	C2	No Infection	s2w2	37.735	551.83	586	7.154
2020_01_21	No Parasitism	C2	No Infection	s2w2	47.561	572.32	614	7.928
2020_01_21	No Parasitism	C2	No Infection	s2w2	56.34	558.799	616	9.279
2020_01_21	No Parasitism	C2	No Infection	s2w2	40.617	643.156	775	8.43
2020_01_21	No Parasitism	C2	No Infection	s2w2	49.068	600.879	647	7.904
2020_01_21	No Parasitism	C2	No Infection	s2w2	82.021	622.336	726	11.311
2020_01_21	No Parasitism	C2	No Infection	s2w2	47.955	586.936	636	8.223
2020_01_21	No Parasitism	C2	No Infection	s2w2	80.317	647.583	719	10.512
2020_01_21	No Parasitism	C2	No Infection	s2w2	118.183	587.999	642	12.811
2020_01_21	No Parasitism	C2	No Infection	s2w2	86.017	594.007	649	10.465
2020_01_21	No Parasitism	C2	No Infection	s2w2	38.783	670.264	767	7.164
2020_01_21	No Parasitism	C2	No Infection	s2w2	40.028	581.288	633	7.399
2020_01_21	No Parasitism	C2	No Infection	s2w2	46.579	568.439	656	7.951
2020_01_21	No Parasitism	C2	No Infection	s2w2	91.454	507.329	579	10.791
2020_01_21	No Parasitism	C2	No Infection	s2w2	54.375	537.634	602	8.736
2020_01_21	No Parasitism	C2	No Infection	s2w2	77.631	558.088	624	11
2020_01_21	No Parasitism	C2	No Infection	s2w2	68.787	586.087	680	10.028
2020_01_21	No Parasitism	C2	No Infection	s2w2	75.862	594.714	696	10.73
2020_01_21	No Parasitism	C2	No Infection	s2w2	32.035	533.037	597	6.962
2020_01_21	No Parasitism	C2	No Infection	s2w2	126.437	535.44	585	12.806
2020_01_21	No Parasitism	C2	No Infection	s2w2	114.252	520.377	572	12.308
2020_01_21	No Parasitism	C2	No Infection	s2w2	72.325	523.803	581	10.009
2020_01_21	No Parasitism	C2	No Infection	s2w2	42.452	543.526	601	8.16
2020_01_21	No Parasitism	C2	No Infection	s2w2	82.021	550.397	610	11.311
2020_01_21	No Parasitism	C2	No Infection	s2w2	101.412	492.459	572	12.336
2020_01_21	No Parasitism	C2	No Infection	s2w2	89.882	483.925	621	11.792
2020_01_21	No Parasitism	C2	No Infection	s2w2	70.032	518.551	566	10.513
2020_01_21	No Parasitism	C2	No Infection	s2w2	60.533	746.095	888	9.45
2020_01_21	No Parasitism	C2	No Infection	s2w2	49.265	552.402	607	8.176
2020_01_21	No Parasitism	C2	No Infection	s2w2	76.125	610.359	705	9.954
2020_01_21	No Parasitism	C2	No Infection	s2w2	248.289	636.016	1648	17.907
2020_01_21	No Parasitism	C2	No Infection	s2w2	36.162	606.199	666	7.42
2020_01_21	No Parasitism	C2	No Infection	s2w2	92.371	587.633	668	11.777
2020_01_21	No Parasitism	C2	No Infection	s2w2	62.891	572.608	672	9.246
2020_01_21	No Parasitism	C2	No Infection	s2w2	72.456	585.554	708	9.77
2020_01_21	No Parasitism	C2	No Infection	s2w2	61.908	566.444	661	9.94
2020_01_21	No Parasitism	C2	No Infection	s2w2	54.375	561.637	627	9.007
2020_01_21	No Parasitism	C2	No Infection	s2w2	84.117	491.03	537	11.268
2020_01_21	No Parasitism	C2	No Infection	s2w2	51.23	526.637	600	8.448
2020_01_21	No Parasitism	C2	No Infection	s2w2	64.725	601.43	689	9.22
2020_01_21	No Parasitism	C2	No Infection	s2w2	95.188	632.174	813	11.552
2020_01_21	No Parasitism	C2	No Infection	s2w2	60.533	572.835	707	9.45
2020_01_21	No Parasitism	C2	No Infection	s2w2	33.149	569.785	699	7.44
2020_01_21	No Parasitism	C2	No Infection	s2w2	59.485	571.36	678	9.222
2020_01_21	No Parasitism	C2	No Infection	s2w2	78.614	589.09	680	10.226
2020_01_21	No Parasitism	C2	No Infection	s2w2	64.725	555.065	672	9.22
2020_01_21	No Parasitism	C2	No Infection	s2w2	91.127	589.624	692	11.021
2020_01_21	No Parasitism	C2	No Infection	s2w2	51.23	563.949	650	8.448
2020_01_21	No Parasitism	C2	No Infection	s2w2	57.781	553.608	644	8.697
2020_01_21	No Parasitism	C2	No Infection	s2w2	85.951	523.774	582	10.678
2020_01_21	No Parasitism	C2	No Infection	s2w2	41.927	612.694	682	7.456
2020_01_21	No Parasitism	C2	No Infection	s2w2	64.725	559.163	647	9.22
2020_01_21	No Parasitism	C2	No Infection	s2w2	78.614	630.79	804	10.226
2020_01_21	No Parasitism	C2	No Infection	s2w2	52.409	517.977	573	8.736
2020_01_21	No Parasitism	C2	No Infection	s2w2	53.195	520.228	574	8.23
2020_01_21	No Parasitism	C2	No Infection	s2w2	73.57	521.003	564	10.458
2020_01_21	No Parasitism	C2	No Infection	s2w2	47.561	529.147	608	7.928
2020_01_21	No Parasitism	C2	No Infection	s2w2	51.099	519.195	576	8.175
2020_01_21	No Parasitism	C2	No Infection	s2w2	52.868	570.342	678	8.444
2020_01_21	No Parasitism	C2	No Infection	s2w2	64.857	504.358	550	9.729
2020_01_21	No Parasitism	C2	No Infection	s2w2	64.857	569.268	646	9.729
2020_01_21	No Parasitism	C2	No Infection	s2w2	56.34	450.995	499	8.753
2020_01_21	No Parasitism	C2	No Infection	s2w2	74.159	470.861	540	10.236
2020_01_21	No Parasitism	C2	No Infection	s2w2	36.424	478.469	546	7.208
2020_01_21	No Parasitism	C2	No Infection	s2w2	71.015	528.703	631	10.983
2020_01_21	No Parasitism	C2	No Infection	s2w2	54.506	490.714	573	8.467
2020_01_21	No Parasitism	C2	No Infection	s2w2	59.681	426.182	479	8.938
2020_01_21	No Parasitism	C2	No Infection	s2w2	104.622	594.816	674	11.542
2020_01_21	No Parasitism	C2	No Infection	s2w2	40.093	600.208	662	7.663
2020_01_21	No Parasitism	C2	No Infection	s2w2	70.753	601.281	668	9.745
2020_01_21	No Parasitism	C2	No Infection	s2w2	35.049	620.789	684	6.948
2020_01_21	No Parasitism	C2	No Infection	s2w2	57.781	637.468	774	8.697
2020_01_21	No Parasitism	C2	No Infection	s2w2	35.376	639.437	711	6.711
2020_01_21	No Parasitism	C2	No Infection	s2w2	28.563	664.376	750	6.202
2020_01_21	No Parasitism	C2	No Infection	s2w2	35.049	604.161	680	6.948
2020_01_21	No Parasitism	C2	No Infection	s2w2	47.561	563.793	652	7.928
2020_01_21	No Parasitism	C2	No Infection	s2w2	49.068	571.462	694	7.904
2020_01_21	No Parasitism	C2	No Infection	s2w2	46.382	605.708	719	8.222
2020_01_21	No Parasitism	C2	No Infection	s2w2	53.195	567.881	662	8.23
2020_01_21	No Parasitism	C2	No Infection	s2w2	45.072	519.686	605	7.997
2020_01_21	No Parasitism	C2	No Infection	s2w2	37.735	583.306	665	7.154
2020_01_21	No Parasitism	C2	No Infection	s2w2	38.783	546.127	665	7.164
2020_01_21	No Parasitism	C2	No Infection	s2w2	46.579	655.752	738	7.951
2020_01_21	No Parasitism	C2	No Infection	s2w2	36.424	492.937	538	7.208
2020_01_21	No Parasitism	C2	No Infection	s2w2	36.424	624.815	711	7.208
2020_01_21	No Parasitism	C2	No Infection	s2w2	33.673	607.366	699	6.658
2020_01_21	No Parasitism	C2	No Infection	s2w2	64.463	574.324	628	10.008
2020_01_21	No Parasitism	C2	No Infection	s2w2	39.569	510.699	548	8.139
2020_01_21	No Parasitism	C2	No Infection	s2w2	47.955	508.313	570	8.223
2020_01_21	No Parasitism	C2	No Infection	s2w2	57.912	516.038	625	8.967
2020_01_21	No Parasitism	C2	Infection	s2w10	390.318	1109.84	1800	26.099
2020_01_21	No Parasitism	C2	Infection	s2w10	299.454	817.953	1126	23.722
2020_01_21	No Parasitism	C2	Infection	s2w10	879.166	1158.3	2383	38.297
2020_01_21	No Parasitism	C2	Infection	s2w10	794.722	1083.91	2048	34.76
2020_01_21	No Parasitism	C2	Infection	s2w10	209.244	1854.36	2801	19.296
2020_01_21	No Parasitism	C2	Infection	s2w10	234.597	1117.07	1878	25.686
2020_01_21	No Parasitism	C2	Infection	s2w10	80.71	882.843	1064	10.289
2020_01_21	No Parasitism	C2	Infection	s2w10	95.45	709.082	886	11.024
2020_01_21	No Parasitism	C2	Infection	s2w10	104.295	828.614	1006	13.263
2020_01_21	No Parasitism	C2	Infection	s2w10	70.753	699.794	1039	9.745
2020_01_21	No Parasitism	C2	Infection	s2w10	64.857	764.58	977	9.729
2020_01_21	No Parasitism	C2	Infection	s2w10	60.533	784.081	997	9.45
2020_01_21	No Parasitism	C2	Infection	s2w10	45.072	789.974	974	7.997
2020_01_21	No Parasitism	C2	Infection	s2w10	99.774	819.634	1359	11.519
2020_01_21	No Parasitism	C2	Infection	s2w10	41.927	892.317	1070	7.456
2020_01_21	No Parasitism	C2	Infection	s2w10	66.822	1114.34	1387	9.224
2020_01_21	No Parasitism	C2	Infection	s2w10	164.958	810.241	1044	19.219
2020_01_21	No Parasitism	C2	Infection	s2w10	76.321	702.503	796	12.057
2020_01_21	No Parasitism	C2	Infection	s2w10	217.171	704.863	912	19.717
2020_01_21	No Parasitism	C2	Infection	s2w10	213.699	733.038	1010	18.637
2020_01_21	No Parasitism	C2	Infection	s2w10	167.972	774.94	1077	15.436
2020_01_21	No Parasitism	C2	Infection	s2w10	810.313	1270.55	2358	40.24
2020_01_21	No Parasitism	C2	Infection	s2w10	425.498	1080.19	2940	30.553
2020_01_21	No Parasitism	C2	Infection	s2w10	59.354	578.709	633	9.647
2020_01_21	No Parasitism	C2	Infection	s2w10	59.55	770.857	1041	9.033
2020_01_21	No Parasitism	C2	Infection	s2w10	77.631	807.626	907	11.501
2020_01_21	No Parasitism	C2	Infection	s2w10	59.55	796.349	882	9.235
2020_01_21	No Parasitism	C2	Infection	s2w10	50.378	768.797	897	8.181
2020_01_21	No Parasitism	C2	Infection	s2w10	276.59	1032.87	2123	18.818
2020_01_21	No Parasitism	C2	Infection	s2w10	547.481	1607.89	2546	36.944
2020_01_21	No Parasitism	C2	Infection	s2w10	219.202	822.365	1213	17.821
2020_01_21	No Parasitism	C2	Infection	s2w10	1471.59	878.331	1951	56.839
2020_01_21	No Parasitism	C2	Infection	s2w10	429.887	1101.2	2449	27.547
2020_01_21	No Parasitism	C2	Infection	s2w10	176.488	816.814	1030	17.939
2020_01_21	No Parasitism	C2	Infection	s2w10	76.125	641.897	824	9.954
2020_01_21	No Parasitism	C2	Infection	s2w10	37.735	693.438	745	7.154
2020_01_21	No Parasitism	C2	Infection	s2w10	91.454	870.807	1209	13.325
2020_01_21	No Parasitism	C2	Infection	s2w10	57.912	678.449	913	9.227
2020_01_21	No Parasitism	C2	Infection	s2w10	41.796	786.229	869	7.67
2020_01_21	No Parasitism	C2	Infection	s2w10	71.08	695.984	802	9.513
2020_01_21	No Parasitism	C2	Infection	s2w10	46.579	781.682	1189	7.951
2020_01_21	No Parasitism	C2	Infection	s2w10	29.349	685.067	731	6.113
2020_01_21	No Parasitism	C2	Infection	s2w10	36.162	678.241	745	7.42
2020_01_21	No Parasitism	C2	Infection	s2w10	95.385	884.139	1088	11.28
2020_01_21	No Parasitism	C2	Infection	s2w10	73.57	907.539	1142	10.458
2020_01_21	No Parasitism	C2	Infection	s2w10	56.143	823.39	1089	8.967
2020_01_21	No Parasitism	C2	Infection	s2w10	56.34	876.065	1029	8.753
2020_01_21	No Parasitism	C2	Infection	s2w10	63.284	1047.62	1430	12.107
2020_01_21	No Parasitism	C2	Infection	s2w10	38.652	1063.01	1339	7.703
2020_01_21	No Parasitism	C2	Infection	s2w10	411.282	1113.04	2776	25.782
2020_01_21	No Parasitism	C2	Infection	s2w10	1113.04	1268.8	3380	46.47
2020_01_21	No Parasitism	C2	Infection	s2w10	481.707	1415.68	2275	29.527
2020_01_21	No Parasitism	C2	Infection	s2w10	109.011	646.609	839	12.292
2020_01_21	No Parasitism	C2	Infection	s2w10	126.306	1035.45	1506	13.067
2020_01_21	No Parasitism	C2	Infection	s2w10	74.159	664.663	732	10.236
2020_01_21	No Parasitism	C2	Infection	s2w10	65.119	762.559	1116	9.517
2020_01_21	No Parasitism	C2	Infection	s2w10	50.247	645.611	877	9.955
2020_01_21	No Parasitism	C2	Infection	s2w10	70.228	852.931	1003	10.258
2020_01_21	No Parasitism	C2	Infection	s2w10	52.868	946.157	1588	8.444
2020_01_21	No Parasitism	C2	Infection	s2w10	90.406	2129.79	3197	12.85
2020_01_21	No Parasitism	C2	Infection	s2w10	667.039	899.578	1325	34.237
2020_01_21	No Parasitism	C2	Infection	s2w10	27.515	637.943	690	6.144
2020_01_21	High Parasitism	NSRef-3	No Infection	s6w2	51.885	411.552	487	9.199
2020_01_21	High Parasitism	NSRef-3	No Infection	s6w2	70.753	399.098	461	9.745
2020_01_21	High Parasitism	NSRef-3	No Infection	s6w2	46.382	441.835	509	8.222
2020_01_21	High Parasitism	NSRef-3	No Infection	s6w2	60.533	542.778	651	9.45
2020_01_21	High Parasitism	NSRef-3	No Infection	s6w2	37.8	452.705	531	6.937
2020_01_21	High Parasitism	NSRef-3	No Infection	s6w2	28.563	499.661	558	6.202
2020_01_21	High Parasitism	NSRef-3	No Infection	s6w2	53.982	496.074	663	9.215
2020_01_21	High Parasitism	NSRef-3	No Infection	s6w2	101.15	440.611	534	12.57
2020_01_21	High Parasitism	NSRef-3	No Infection	s6w2	30.79	523.506	607	6.672
2020_01_21	High Parasitism	NSRef-3	No Infection	s6w2	33.673	501.788	564	6.658
2020_01_21	High Parasitism	NSRef-3	No Infection	s6w2	28.563	535.862	620	6.202
2020_01_21	High Parasitism	NSRef-3	No Infection	s6w2	60.14	489.932	666	9.987
2020_01_21	High Parasitism	NSRef-3	No Infection	s6w2	46.579	457.744	516	7.951
2020_01_21	High Parasitism	NSRef-3	No Infection	s6w2	49.33	456.687	514	8.437
2020_01_21	High Parasitism	NSRef-3	No Infection	s6w2	43.303	488.345	571	7.934
2020_01_21	High Parasitism	NSRef-3	No Infection	s6w2	35.049	486.8	571	6.948
2020_01_21	High Parasitism	NSRef-3	No Infection	s6w2	54.375	478.831	536	9.007
2020_01_21	High Parasitism	NSRef-3	No Infection	s6w2	40.093	455.73	561	7.663
2020_01_21	High Parasitism	NSRef-3	No Infection	s6w2	27.515	461.226	549	6.144
2020_01_21	High Parasitism	NSRef-3	No Infection	s6w2	33.542	503.225	590	7.233
2020_01_21	High Parasitism	NSRef-3	No Infection	s6w2	62.891	434.36	495	9.246
2020_01_21	High Parasitism	NSRef-3	No Infection	s6w2	36.555	486.717	601	6.991
2020_01_21	High Parasitism	NSRef-3	No Infection	s6w2	34.787	489.944	574	7.43
2020_01_21	High Parasitism	NSRef-3	No Infection	s6w2	36.555	490.787	567	6.991
2020_01_21	High Parasitism	NSRef-3	No Infection	s6w2	36.555	502.547	580	6.991
2020_01_21	High Parasitism	NSRef-3	No Infection	s6w2	23.977	520.437	613	5.686
2020_01_21	High Parasitism	NSRef-3	No Infection	s6w2	57.781	514.858	636	8.697
2020_01_21	High Parasitism	NSRef-3	No Infection	s6w2	41.796	503.127	628	7.67
2020_01_21	High Parasitism	NSRef-3	No Infection	s6w2	121.983	428.561	570	14.953
2020_01_21	High Parasitism	NSRef-3	No Infection	s6w2	79.138	452.407	552	12.652
2020_01_21	High Parasitism	NSRef-3	No Infection	s6w2	86.082	445.194	906	11.851
2020_01_21	High Parasitism	NSRef-3	No Infection	s6w2	70.753	461.996	758	9.745
2020_01_21	High Parasitism	NSRef-3	No Infection	s6w2	53.457	452.854	554	9.488
2020_01_21	High Parasitism	NSRef-3	No Infection	s6w2	43.762	461.934	547	7.728
2020_01_21	High Parasitism	NSRef-3	No Infection	s6w2	57.781	402.414	458	8.697
2020_01_21	High Parasitism	NSRef-3	No Infection	s6w2	65.446	399.998	464	10.476
2020_01_21	High Parasitism	NSRef-3	No Infection	s6w2	59.681	417.289	504	8.938
2020_01_21	High Parasitism	NSRef-3	No Infection	s6w2	46.382	453.551	551	8.222
2020_01_21	High Parasitism	NSRef-3	No Infection	s6w2	52.409	459.908	821	8.736
2020_01_21	High Parasitism	NSRef-3	No Infection	s6w2	68.918	429.793	487	9.489
2020_01_21	High Parasitism	NSRef-3	No Infection	s6w2	32.232	492.933	577	6.657
2020_01_21	High Parasitism	NSRef-3	No Infection	s6w2	35.049	489.015	566	6.948
2020_01_21	High Parasitism	NSRef-3	No Infection	s6w2	35.049	495.817	590	6.948
2020_01_21	High Parasitism	NSRef-3	No Infection	s6w2	61.45	491.028	588	8.955
2020_01_21	High Parasitism	NSRef-3	No Infection	s6w2	111.501	606.097	797	12.059
2020_01_21	High Parasitism	NSRef-3	No Infection	s6w2	56.34	438.976	555	8.753
2020_01_21	High Parasitism	NSRef-3	No Infection	s6w2	43.762	446.457	587	7.728
2020_01_21	High Parasitism	NSRef-3	No Infection	s6w2	49.265	474.705	540	8.176
2020_01_21	High Parasitism	NSRef-3	No Infection	s6w2	57.781	534.63	1111	8.697
2020_01_21	High Parasitism	NSRef-3	No Infection	s6w2	40.028	509.056	721	7.399
2020_01_21	High Parasitism	NSRef-3	No Infection	s6w2	32.232	522.705	654	6.657
2020_01_21	High Parasitism	NSRef-3	No Infection	s6w2	72.325	443.801	584	10.009
2020_01_21	High Parasitism	NSRef-3	No Infection	s6w2	30.921	502.112	625	6.384
2020_01_21	High Parasitism	NSRef-3	No Infection	s6w2	40.093	484.688	591	7.663
2020_01_21	High Parasitism	NSRef-3	No Infection	s6w2	36.424	466.234	529	7.208
2020_01_21	High Parasitism	NSRef-3	No Infection	s6w2	33.673	459.772	551	6.658
2020_01_21	High Parasitism	NSRef-3	No Infection	s6w2	47.561	433.331	494	7.928
2020_01_21	High Parasitism	NSRef-3	No Infection	s6w2	43.762	449.347	615	7.728
2020_01_21	High Parasitism	NSRef-3	No Infection	s6w2	32.232	467.112	575	6.657
2020_01_21	High Parasitism	NSRef-3	No Infection	s6w2	40.028	436.38	534	7.399
2020_01_21	High Parasitism	NSRef-3	No Infection	s6w2	45.203	421.977	482	7.714
2020_01_21	High Parasitism	NSRef-3	No Infection	s6w2	36.555	469.724	545	6.991
2020_01_21	High Parasitism	NSRef-3	No Infection	s6w2	38.39	481.294	569	7.392
2020_01_21	High Parasitism	NSRef-3	No Infection	s6w2	33.673	465.078	566	6.658
2020_01_21	High Parasitism	NSRef-3	No Infection	s6w2	46.579	412.549	489	7.951
2020_01_21	High Parasitism	NSRef-3	No Infection	s6w2	88.703	398.462	462	10.736
2020_01_21	High Parasitism	NSRef-3	No Infection	s6w2	51.23	380.398	446	8.448
2020_01_21	High Parasitism	NSRef-3	No Infection	s6w2	85.493	456.585	659	12.142
2020_01_21	High Parasitism	NSRef-3	No Infection	s6w2	43.303	405.808	462	10.108
2020_01_21	High Parasitism	NSRef-3	No Infection	s6w2	41.272	408.484	504	8.386
2020_01_21	High Parasitism	NSRef-3	No Infection	s6w2	20.243	487.204	565	5.618
2020_01_21	High Parasitism	NSRef-3	No Infection	s6w2	30.528	523.888	617	7.592
2020_01_21	High Parasitism	NSRef-3	No Infection	s6w2	50.116	475.254	546	8.466
2020_01_21	High Parasitism	NSRef-3	No Infection	s6w2	854.272	613.743	2158	35.255
2020_01_21	High Parasitism	NSRef-3	No Infection	s6w2	45.203	470.07	600	7.714
2020_01_21	High Parasitism	NSRef-3	No Infection	s6w2	37.735	411.837	460	7.154
2020_01_21	High Parasitism	NSRef-3	No Infection	s6w2	35.376	415.091	488	6.711
2020_01_21	High Parasitism	NSRef-3	No Infection	s6w2	60.009	450.197	516	10.293
2020_01_21	High Parasitism	NSRef-3	No Infection	s6w2	50.706	496.74	648	8.673
2020_01_21	High Parasitism	NSRef-3	No Infection	s6w2	45.072	479.488	617	7.997
2020_01_21	High Parasitism	NSRef-3	No Infection	s6w2	134.495	603.324	772	13.086
2020_01_21	High Parasitism	NSRef-3	No Infection	s6w2	86.999	417.071	520	12.027
2020_01_21	High Parasitism	NSRef-3	No Infection	s6w2	28.432	459.774	533	6.416
2020_01_21	High Parasitism	NSRef-3	No Infection	s6w2	36.424	476.642	537	7.208
2020_01_21	High Parasitism	NSRef-3	No Infection	s6w2	37.735	474.036	597	7.154
2020_01_21	High Parasitism	NSRef-3	No Infection	s6w2	49.265	476.898	559	8.176
2020_01_21	High Parasitism	NSRef-3	No Infection	s6w2	56.34	468.445	579	8.753
2020_01_21	High Parasitism	NSRef-3	No Infection	s6w2	56.34	508.63	636	8.753
2020_01_21	High Parasitism	NSRef-3	No Infection	s6w2	32.035	530.022	616	6.387
2020_01_21	High Parasitism	NSRef-3	No Infection	s6w2	52.868	421.077	492	8.444
2020_01_21	High Parasitism	NSRef-3	No Infection	s6w2	38.39	448.435	611	7.392
2020_01_21	High Parasitism	NSRef-3	No Infection	s6w2	40.093	503.471	596	7.663
2020_01_21	High Parasitism	NSRef-3	No Infection	s6w2	118.117	540.654	771	13.039
2020_01_21	High Parasitism	NSRef-3	No Infection	s6w2	30.921	486.693	604	6.384
2020_01_21	High Parasitism	NSRef-3	No Infection	s6w2	38.652	446.666	539	7.703
2020_01_21	High Parasitism	NSRef-3	No Infection	s6w2	49.068	450.75	550	7.904
2020_01_21	High Parasitism	NSRef-3	No Infection	s6w2	58.96	489.079	674	9.727
2020_01_21	High Parasitism	NSRef-3	No Infection	s6w2	29.349	447.35	532	6.113
2020_01_21	High Parasitism	NSRef-3	No Infection	s6w2	29.546	456.264	522	6.4
2020_01_21	High Parasitism	NSRef-3	No Infection	s6w2	62.629	437.55	667	9.721
2020_01_21	High Parasitism	NSRef-3	No Infection	s6w2	56.34	464.188	530	8.753
2020_01_21	High Parasitism	NSRef-3	No Infection	s6w2	61.45	450.596	1000	8.955
2020_01_21	High Parasitism	NSRef-3	No Infection	s6w2	28.563	443.778	512	6.202
2020_01_21	High Parasitism	NSRef-3	No Infection	s6w2	36.424	383.345	438	7.208
2020_01_21	High Parasitism	NSRef-3	No Infection	s6w2	59.681	400.031	659	8.938
2020_01_21	High Parasitism	NSRef-3	No Infection	s6w2	56.34	393.335	467	8.753
2020_01_21	High Parasitism	NSRef-3	No Infection	s6w2	61.45	376.387	440	8.955
2020_01_21	High Parasitism	NSRef-3	No Infection	s6w2	49.33	380.936	546	8.437
2020_01_21	High Parasitism	NSRef-3	No Infection	s6w2	35.049	427.422	507	6.948
2020_01_21	High Parasitism	NSRef-3	No Infection	s6w2	68.787	418.254	475	10.028
2020_01_21	High Parasitism	NSRef-3	No Infection	s6w2	36.424	427.072	485	7.208
2020_01_21	High Parasitism	NSRef-3	No Infection	s6w2	43.565	451.687	807	7.448
2020_01_21	High Parasitism	NSRef-3	No Infection	s6w2	45.203	462.972	583	7.714
2020_01_21	High Parasitism	NSRef-3	No Infection	s6w2	26.074	465.673	538	5.871
2020_01_21	High Parasitism	NSRef-3	No Infection	s6w2	40.028	493.66	590	7.399
2020_01_21	High Parasitism	NSRef-3	No Infection	s6w2	46.382	435.092	619	9.167
2020_01_21	High Parasitism	NSRef-3	No Infection	s6w2	41.534	427.588	606	9.786
2020_01_21	High Parasitism	NSRef-3	No Infection	s6w2	33.673	472.784	577	6.658
2020_01_21	High Parasitism	NSRef-3	No Infection	s6w2	56.34	448.851	494	8.753
2020_01_21	High Parasitism	NSRef-3	No Infection	s6w2	82.741	548.82	660	10.539
2020_01_21	High Parasitism	NSRef-3	No Infection	s6w2	38.652	520.068	603	7.703
2020_01_21	High Parasitism	NSRef-3	No Infection	s6w2	192.146	405.954	643	15.641
2020_01_21	High Parasitism	NSRef-3	No Infection	s6w2	76.125	451.919	524	9.954
2020_01_21	High Parasitism	NSRef-3	No Infection	s6w2	53.457	413.304	486	10.237
2020_01_21	High Parasitism	NSRef-3	No Infection	s6w2	117.397	390.502	446	13.856
2020_01_21	High Parasitism	NSRef-3	No Infection	s6w2	106.653	395.976	452	12.09
2020_01_21	High Parasitism	NSRef-3	No Infection	s6w2	47.561	485.022	913	7.928
2020_01_21	High Parasitism	NSRef-3	No Infection	s6w2	38.783	472.916	687	7.164
2020_01_21	High Parasitism	NSRef-3	No Infection	s6w2	36.424	483.649	586	7.208
2020_01_21	High Parasitism	NSRef-3	No Infection	s6w2	84.772	456.736	764	10.801
2020_01_21	High Parasitism	NSRef-3	No Infection	s6w2	46.317	605.388	970	8.498
2020_01_21	High Parasitism	NSRef-3	No Infection	s6w2	36.424	523.135	715	7.208
2020_01_21	High Parasitism	NSRef-3	No Infection	s6w2	67.674	460.697	580	13.262
2020_01_21	High Parasitism	NSRef-3	No Infection	s6w2	56.406	369.78	430	8.475
2020_01_21	High Parasitism	NSRef-3	Infection	s6w10	90.603	581.375	644	11.534
2020_01_21	High Parasitism	NSRef-3	Infection	s6w10	36.424	572.996	629	7.208
2020_01_21	High Parasitism	NSRef-3	Infection	s6w10	41.796	563.429	603	7.67
2020_01_21	High Parasitism	NSRef-3	Infection	s6w10	47.692	590.441	684	8.434
2020_01_21	High Parasitism	NSRef-3	Infection	s6w10	308.232	745.449	1023	24.987
2020_01_21	High Parasitism	NSRef-3	Infection	s6w10	160.241	562.139	650	14.933
2020_01_21	High Parasitism	NSRef-3	Infection	s6w10	417.309	725.036	1226	37.133
2020_01_21	High Parasitism	NSRef-3	Infection	s6w10	474.763	710.165	995	36.796
2020_01_21	High Parasitism	NSRef-3	Infection	s6w10	744.474	723.963	1462	56.482
2020_01_21	High Parasitism	NSRef-3	Infection	s6w10	850.013	731.011	1298	46.196
2020_01_21	High Parasitism	NSRef-3	Infection	s6w10	450.982	724.766	1326	35.246
2020_01_21	High Parasitism	NSRef-3	Infection	s6w10	337.581	937.952	1327	43.67
2020_01_21	High Parasitism	NSRef-3	Infection	s6w10	375.906	931.912	1446	33.466
2020_01_21	High Parasitism	NSRef-3	Infection	s6w10	228.963	661.093	971	19.594
2020_01_21	High Parasitism	NSRef-3	Infection	s6w10	377.675	992.735	1420	34.553
2020_01_21	High Parasitism	NSRef-3	Infection	s6w10	113.794	627.859	690	12.529
2020_01_21	High Parasitism	NSRef-3	Infection	s6w10	43.762	593.084	647	7.728
2020_01_21	High Parasitism	NSRef-3	Infection	s6w10	59.485	608.365	706	9.222
2020_01_21	High Parasitism	NSRef-3	Infection	s6w10	88.703	614.244	808	10.736
2020_01_21	High Parasitism	NSRef-3	Infection	s6w10	46.579	632.581	742	7.951
2020_01_21	High Parasitism	NSRef-3	Infection	s6w10	38.521	614.027	698	7.955
2020_01_21	High Parasitism	NSRef-3	Infection	s6w10	78.155	708.35	941	10.495
2020_01_21	High Parasitism	NSRef-3	Infection	s6w10	73.635	676.868	762	9.683
2020_01_21	High Parasitism	NSRef-3	Infection	s6w10	43.565	596.639	642	7.448
2020_01_21	High Parasitism	NSRef-3	Infection	s6w10	72.456	577.127	642	9.77
2020_01_21	High Parasitism	NSRef-3	Infection	s6w10	57.781	592.783	635	8.697
2020_01_21	High Parasitism	NSRef-3	Infection	s6w10	65.119	621.921	696	9.517
2020_01_21	High Parasitism	NSRef-3	Infection	s6w10	38.783	520.439	632	7.164
2020_01_21	High Parasitism	NSRef-3	Infection	s6w10	46.317	524.815	632	8.498
2020_01_21	High Parasitism	NSRef-3	Infection	s6w10	93.289	550.524	603	11.295
2020_01_21	High Parasitism	NSRef-3	Infection	s6w10	30.921	499.066	548	6.384
2020_01_21	High Parasitism	NSRef-3	Infection	s6w10	97.481	510.776	566	11.258
2020_01_21	High Parasitism	NSRef-3	Infection	s6w10	32.035	552.045	590	6.962
2020_01_21	High Parasitism	NSRef-3	Infection	s6w10	72.456	623.229	741	9.77
2020_01_21	High Parasitism	NSRef-3	Infection	s6w10	56.406	592.357	683	8.475
2020_01_21	High Parasitism	NSRef-3	Infection	s6w10	103.246	601.145	675	12.241
2020_01_21	High Parasitism	NSRef-3	Infection	s6w10	47.692	589.279	692	8.434
2020_01_21	High Parasitism	NSRef-3	Infection	s6w10	51.23	582.899	636	8.448
2020_01_21	High Parasitism	NSRef-3	Infection	s6w10	59.747	611.004	696	8.722
2020_01_21	High Parasitism	NSRef-3	Infection	s6w10	57.912	608.157	667	8.967
2020_01_21	High Parasitism	NSRef-3	Infection	s6w10	135.216	562.414	624	16.387
2020_01_21	High Parasitism	NSRef-3	Infection	s6w10	139.409	552.081	740	13.323
2020_01_21	High Parasitism	NSRef-3	Infection	s6w10	56.34	539.83	597	8.753
2020_01_21	High Parasitism	NSRef-3	Infection	s6w10	53.982	591.242	651	9.215
2020_01_21	High Parasitism	NSRef-3	Infection	s6w10	82.545	592.059	670	10.784
2020_01_21	High Parasitism	NSRef-3	Infection	s6w10	45.269	616.37	799	8.98
2020_01_21	High Parasitism	NSRef-3	Infection	s6w10	93.289	595.852	809	11.295
2020_01_21	High Parasitism	NSRef-3	Infection	s6w10	49.265	554.991	774	8.176
2020_01_21	High Parasitism	NSRef-3	Infection	s6w10	88.572	547.982	637	11.303
2020_01_21	High Parasitism	NSRef-3	Infection	s6w10	133.644	584.449	680	13.87
2020_01_21	High Parasitism	NSRef-3	Infection	s6w10	155.721	795.854	1176	15.95
2020_01_21	High Parasitism	NSRef-3	Infection	s6w10	281.503	711.228	882	21.989
2020_01_21	High Parasitism	NSRef-3	Infection	s6w10	78.679	678.17	933	13.66
2020_01_21	High Parasitism	NSRef-3	Infection	s6w10	228.046	680.108	899	18.284
2020_01_21	High Parasitism	NSRef-3	Infection	s6w10	738.644	857.089	2296	50.028
2020_01_21	High Parasitism	NSRef-3	Infection	s6w10	311.246	612.321	715	22.386
2020_01_21	High Parasitism	NSRef-3	Infection	s6w10	222.281	616.473	883	18.464
2020_01_21	High Parasitism	NSRef-3	Infection	s6w10	329.917	581.582	693	26.45
2020_01_21	High Parasitism	NSRef-3	Infection	s6w10	897.64	664.141	1340	45.632
2020_01_21	High Parasitism	NSRef-3	Infection	s6w10	693.048	739.796	1146	41.832
2020_01_21	High Parasitism	NSRef-3	Infection	s6w10	26.074	558.266	613	5.871
2020_01_21	High Parasitism	NSRef-3	Infection	s6w10	66.822	589.936	662	9.224
2020_01_21	High Parasitism	NSRef-3	Infection	s6w10	81.955	585.584	648	11.009
2020_01_21	High Parasitism	NSRef-3	Infection	s6w10	34.852	573.976	617	7.161
2020_01_21	High Parasitism	NSRef-3	Infection	s6w10	43.565	584.102	632	7.448
2020_01_21	High Parasitism	NSRef-3	Infection	s6w10	43.762	577.305	673	7.728
2020_01_21	High Parasitism	NSRef-3	Infection	s6w10	131.809	817.582	1194	14.86
2020_01_21	High Parasitism	NSRef-3	Infection	s6w10	57.912	586.146	709	8.967
2020_01_21	High Parasitism	NSRef-3	Infection	s6w10	58.436	594.834	646	9.824
2020_01_21	High Parasitism	NSRef-3	Infection	s6w10	110.191	543.885	735	13.116
2020_01_21	High Parasitism	NSRef-3	Infection	s6w10	152.511	540.087	708	14.306
2020_01_21	High Parasitism	NSRef-3	Infection	s6w10	27.58	563.729	635	5.926
2020_01_21	High Parasitism	NSRef-3	Infection	s6w10	68.132	496.967	565	10.546
2020_01_21	High Parasitism	NSRef-3	Infection	s6w10	52.868	487.266	539	8.444
2020_01_21	High Parasitism	NSRef-3	Infection	s6w10	32.035	493.534	569	6.962
2020_01_21	High Parasitism	NSRef-3	Infection	s6w10	130.63	520.812	614	13.809
2020_01_21	High Parasitism	NSRef-3	Infection	s6w10	43.762	493.696	616	8.636
2020_01_21	High Parasitism	NSRef-3	Infection	s6w10	64.005	547.931	645	12.458
2020_01_21	High Parasitism	NSRef-3	Infection	s6w10	740.543	691.22	1477	54.414
2020_01_21	High Parasitism	NSRef-3	Infection	s6w10	112.483	538.66	644	14.831
2020_01_21	High Parasitism	NSRef-3	Infection	s6w10	60.795	531.484	577	9.189
2020_01_21	High Parasitism	NSRef-3	Infection	s6w10	29.873	575.923	624	7.093
2020_01_21	High Parasitism	NSRef-3	Infection	s6w10	38.783	571.666	625	7.164
2020_01_21	High Parasitism	NSRef-3	Infection	s6w10	33.673	564.527	620	6.658
2020_01_21	High Parasitism	NSRef-3	Infection	s6w10	26.074	591.349	637	5.871
2020_01_21	High Parasitism	NSRef-3	Infection	s6w10	64.529	520.611	619	11.691
2020_01_21	High Parasitism	NSRef-3	Infection	s6w10	108.88	509.55	581	14.103
2020_01_21	No Parasitism	C3	No Infection	s3w2	29.349	840.779	970	6.113
2020_01_21	No Parasitism	C3	No Infection	s3w2	36.555	839.427	967	6.991
2020_01_21	No Parasitism	C3	No Infection	s3w2	26.074	841.035	932	5.871
2020_01_21	No Parasitism	C3	No Infection	s3w2	25.156	685.565	782	5.66
2020_01_21	No Parasitism	C3	No Infection	s3w2	28.563	695.638	774	6.202
2020_01_21	No Parasitism	C3	No Infection	s3w2	104.295	640.335	704	11.804
2020_01_21	No Parasitism	C3	No Infection	s3w2	101.281	647.847	702	11.977
2020_01_21	No Parasitism	C3	No Infection	s3w2	47.561	672.886	775	7.928
2020_01_21	No Parasitism	C3	No Infection	s3w2	43.565	788.913	1024	7.448
2020_01_21	No Parasitism	C3	No Infection	s3w2	33.28	764.362	900	6.888
2020_01_21	No Parasitism	C3	No Infection	s3w2	104.295	805.402	919	11.804
2020_01_21	No Parasitism	C3	No Infection	s3w2	25.156	899.484	982	5.66
2020_01_21	No Parasitism	C3	No Infection	s3w2	28.563	877.475	957	6.202
2020_01_21	No Parasitism	C3	No Infection	s3w2	40.028	946.628	1101	7.399
2020_01_21	No Parasitism	C3	No Infection	s3w2	28.563	853.963	951	6.202
2020_01_21	No Parasitism	C3	No Infection	s3w2	30.921	878.737	985	6.384
2020_01_21	No Parasitism	C3	No Infection	s3w2	53.195	829.549	1004	8.23
2020_01_21	No Parasitism	C3	No Infection	s3w2	27.515	896.295	1011	6.144
2020_01_21	No Parasitism	C3	No Infection	s3w2	17.95	889.861	992	4.894
2020_01_21	No Parasitism	C3	No Infection	s3w2	26.205	910.635	1036	6.146
2020_01_21	No Parasitism	C3	No Infection	s3w2	99.84	848.123	1064	11.766
2020_01_21	No Parasitism	C3	No Infection	s3w2	93.289	844.142	986	11.295
2020_01_21	No Parasitism	C3	No Infection	s3w2	46.382	665.398	715	8.222
2020_01_21	No Parasitism	C3	No Infection	s3w2	49.265	661.531	726	8.176
2020_01_21	No Parasitism	C3	No Infection	s3w2	106.522	801.748	991	11.755
2020_01_21	No Parasitism	C3	No Infection	s3w2	46.579	684.48	770	7.951
2020_01_21	No Parasitism	C3	No Infection	s3w2	35.376	654.431	707	6.711
2020_01_21	No Parasitism	C3	No Infection	s3w2	51.23	657.165	727	8.448
2020_01_21	No Parasitism	C3	No Infection	s3w2	54.375	595.295	702	8.736
2020_01_21	No Parasitism	C3	No Infection	s3w2	35.376	613.267	666	6.711
2020_01_21	No Parasitism	C3	No Infection	s3w2	43.762	562.777	617	7.728
2020_01_21	No Parasitism	C3	No Infection	s3w2	36.162	539.308	605	7.42
2020_01_21	No Parasitism	C3	No Infection	s3w2	60.795	644.708	744	9.189
2020_01_21	No Parasitism	C3	No Infection	s3w2	49.265	780.033	910	8.176
2020_01_21	No Parasitism	C3	No Infection	s3w2	60.14	668.638	742	9.987
2020_01_21	No Parasitism	C3	No Infection	s3w2	37.8	925.009	1082	7.483
2020_01_21	No Parasitism	C3	No Infection	s3w2	60.795	678.773	758	9.189
2020_01_21	No Parasitism	C3	No Infection	s3w2	86.541	628.448	714	11.045
2020_01_21	No Parasitism	C3	No Infection	s3w2	57.912	742.589	817	8.967
2020_01_21	No Parasitism	C3	No Infection	s3w2	36.555	698.932	807	6.991
2020_01_21	No Parasitism	C3	No Infection	s3w2	47.955	801.101	897	8.223
2020_01_21	No Parasitism	C3	No Infection	s3w2	49.068	750.148	843	7.904
2020_01_21	No Parasitism	C3	No Infection	s3w2	74.356	689.025	768	10.023
2020_01_21	No Parasitism	C3	No Infection	s3w2	30.921	763.025	883	6.384
2020_01_21	No Parasitism	C3	No Infection	s3w2	45.203	769.775	941	7.714
2020_01_21	No Parasitism	C3	No Infection	s3w2	57.912	656.093	742	9.227
2020_01_21	No Parasitism	C3	No Infection	s3w2	41.927	735.548	814	7.456
2020_01_21	No Parasitism	C3	No Infection	s3w2	38.39	569.078	650	7.392
2020_01_21	No Parasitism	C3	No Infection	s3w2	26.074	518.166	557	5.871
2020_01_21	No Parasitism	C3	No Infection	s3w2	27.515	632.981	709	6.144
2020_01_21	No Parasitism	C3	No Infection	s3w2	108.946	651.968	743	12.041
2020_01_21	No Parasitism	C3	No Infection	s3w2	62.891	738.932	871	9.246
2020_01_21	No Parasitism	C3	No Infection	s3w2	20.702	668.551	753	5.134
2020_01_21	No Parasitism	C3	No Infection	s3w2	29.611	656.719	723	6.642
2020_01_21	No Parasitism	C3	No Infection	s3w2	40.355	685.323	815	7.168
2020_01_21	No Parasitism	C3	No Infection	s3w2	40.093	715.56	882	7.663
2020_01_21	No Parasitism	C3	No Infection	s3w2	53.326	642.532	708	11.999
2020_01_21	No Parasitism	C3	No Infection	s3w2	33.673	661.774	725	6.658
2020_01_21	No Parasitism	C3	No Infection	s3w2	31.708	656.31	740	7.168
2020_01_21	No Parasitism	C3	No Infection	s3w2	30.528	672.661	715	6.878
2020_01_21	No Parasitism	C3	No Infection	s3w2	30.79	749.106	841	6.672
2020_01_21	No Parasitism	C3	No Infection	s3w2	45.203	676.414	729	7.714
2020_01_21	No Parasitism	C3	No Infection	s3w2	29.546	608.432	647	6.4
2020_01_21	No Parasitism	C3	No Infection	s3w2	35.376	636.337	694	6.711
2020_01_21	No Parasitism	C3	No Infection	s3w2	45.072	633.488	729	7.997
2020_01_21	No Parasitism	C3	No Infection	s3w2	46.382	629.021	687	8.222
2020_01_21	No Parasitism	C3	No Infection	s3w2	36.752	544.977	606	7.912
2020_01_21	No Parasitism	C3	No Infection	s3w2	86.737	584.65	645	12.307
2020_01_21	No Parasitism	C3	No Infection	s3w2	75.338	548.834	627	10.994
2020_01_21	No Parasitism	C3	No Infection	s3w2	40.355	692.297	741	7.168
2020_01_21	No Parasitism	C3	No Infection	s3w2	59.485	781.602	903	9.222
2020_01_21	No Parasitism	C3	Infection	s3w10	111.501	713.147	930	12.059
2020_01_21	No Parasitism	C3	Infection	s3w10	137.509	751.771	838	14.574
2020_01_21	No Parasitism	C3	Infection	s3w10	43.762	727.046	786	7.728
2020_01_21	No Parasitism	C3	Infection	s3w10	38.783	717.106	774	7.164
2020_01_21	No Parasitism	C3	Infection	s3w10	45.203	724.859	816	7.714
2020_01_21	No Parasitism	C3	Infection	s3w10	30.921	733.765	801	6.384
2020_01_21	No Parasitism	C3	Infection	s3w10	41.796	735.281	804	7.67
2020_01_21	No Parasitism	C3	Infection	s3w10	37.8	726.419	772	6.937
2020_01_21	No Parasitism	C3	Infection	s3w10	117.659	786.2	867	13.275
2020_01_21	No Parasitism	C3	Infection	s3w10	64.463	754.167	826	10.008
2020_01_21	No Parasitism	C3	Infection	s3w10	83.396	757.514	883	12.569
2020_01_21	No Parasitism	C3	Infection	s3w10	41.927	776.658	836	7.456
2020_01_21	No Parasitism	C3	Infection	s3w10	120.934	807.214	979	12.802
2020_01_21	No Parasitism	C3	Infection	s3w10	97.612	808.685	883	11.815
2020_01_21	No Parasitism	C3	Infection	s3w10	49.33	772.624	821	8.437
2020_01_21	No Parasitism	C3	Infection	s3w10	45.203	773.517	832	7.714
2020_01_21	No Parasitism	C3	Infection	s3w10	68.787	798.979	1060	9.704
2020_01_21	No Parasitism	C3	Infection	s3w10	99.774	849.777	939	11.519
2020_01_21	No Parasitism	C3	Infection	s3w10	86.017	938.018	1158	10.465
2020_01_21	No Parasitism	C3	Infection	s3w10	33.673	778.354	842	6.658
2020_01_21	No Parasitism	C3	Infection	s3w10	47.955	821.077	911	8.223
2020_01_21	No Parasitism	C3	Infection	s3w10	61.45	735.06	815	8.955
2020_01_21	No Parasitism	C3	Infection	s3w10	59.747	744.616	820	8.722
2020_01_21	No Parasitism	C3	Infection	s3w10	64.725	719.312	787	9.22
2020_01_21	No Parasitism	C3	Infection	s3w10	47.561	720.169	893	7.928
2020_01_21	No Parasitism	C3	Infection	s3w10	64.725	711.901	767	9.22
2020_01_21	No Parasitism	C3	Infection	s3w10	198.566	1128.36	1745	17.43
2020_01_21	No Parasitism	C3	Infection	s3w10	829.312	1224.79	2375	35.229
2020_01_21	No Parasitism	C3	Infection	s3w10	245.013	1155.8	1619	26.511
2020_01_21	No Parasitism	C3	Infection	s3w10	419.602	894.296	1387	26.894
2020_01_21	No Parasitism	C3	Infection	s3w10	51.23	718.637	848	8.448
2020_01_21	No Parasitism	C3	Infection	s3w10	47.955	715.04	783	8.223
2020_01_21	No Parasitism	C3	Infection	s3w10	113.99	657.833	738	12.847
2020_01_21	No Parasitism	C3	Infection	s3w10	54.506	773.6	913	8.467
2020_01_21	No Parasitism	C3	Infection	s3w10	51.099	741.264	788	8.175
2020_01_21	No Parasitism	C3	Infection	s3w10	106.522	642.007	709	11.755
2020_01_21	No Parasitism	C3	Infection	s3w10	70.753	711.187	817	9.745
2020_01_21	No Parasitism	C3	Infection	s3w10	29.611	695.675	743	6.642
2020_01_21	No Parasitism	C3	Infection	s3w10	106.391	697.996	752	12.303
2020_01_21	No Parasitism	C3	Infection	s3w10	101.936	831.912	1020	11.528
2020_01_21	No Parasitism	C3	Infection	s3w10	230.863	1141.04	2434	21.807
2020_01_21	No Parasitism	C3	Infection	s3w10	83.134	705.559	804	12.154
2020_01_21	No Parasitism	C3	Infection	s3w10	59.354	707.223	801	9.815
2020_01_21	No Parasitism	C3	Infection	s3w10	63.219	825.607	1002	10.627
2020_01_21	No Parasitism	C3	Infection	s3w10	38.128	714.567	795	7.097
2020_01_21	No Parasitism	C3	Infection	s3w10	46.186	772.729	898	8.268
2020_01_21	No Parasitism	C3	Infection	s3w10	66.232	704.982	750	12.036
2020_01_21	No Parasitism	C3	Infection	s3w10	107.636	867.408	1103	14.887
2020_01_21	No Parasitism	C3	Infection	s3w10	179.764	848.293	1272	19.072
2020_01_21	No Parasitism	C3	Infection	s3w10	156.18	886.459	1134	18.479
2020_01_21	No Parasitism	C3	Infection	s3w10	380.426	1716.35	3219	39.115
2020_01_21	No Parasitism	C3	Infection	s3w10	60.795	731.741	828	9.189
2020_01_21	No Parasitism	C3	Infection	s3w10	47.823	775.922	950	8.751
2020_01_21	No Parasitism	C3	Infection	s3w10	38.652	754.256	813	7.703
2020_01_21	No Parasitism	C3	Infection	s3w10	62.629	738.045	793	9.721
2020_01_21	No Parasitism	C3	Infection	s3w10	54.375	789.682	849	8.736
2020_01_21	No Parasitism	C3	Infection	s3w10	101.936	1269.36	1750	11.528
2020_01_21	No Parasitism	C3	Infection	s3w10	61.45	778.643	856	8.955
2020_01_21	No Parasitism	C3	Infection	s3w10	60.664	745.989	830	9.732
2020_01_21	No Parasitism	C3	Infection	s3w10	169.806	886.556	1114	15.328
2020_01_21	No Parasitism	C3	Infection	s3w10	84.641	865.237	1048	10.538
2020_01_21	No Parasitism	C3	Infection	s3w10	57.519	614.868	672	9.493
2020_01_21	No Parasitism	C3	Infection	s3w10	123.489	615.176	679	12.539
2020_01_21	No Parasitism	C3	Infection	s3w10	66.56	648.742	706	12.246
2020_01_21	No Parasitism	C3	Infection	s3w10	43.762	713.19	763	7.728
2020_01_21	No Parasitism	C3	Infection	s3w10	62.891	739.146	801	9.246
2020_01_21	No Parasitism	C3	Infection	s3w10	94.075	713.763	909	12.318
2020_01_21	No Parasitism	C3	Infection	s3w10	78.614	722.771	812	10.226
2020_01_21	No Parasitism	C3	Infection	s3w10	110.977	743.67	900	12.829
2020_01_21	No Parasitism	C3	Infection	s3w10	55.03	742.024	815	9.705
2020_01_21	No Parasitism	C3	Infection	s3w10	95.385	728.361	792	11.28
2020_01_21	No Parasitism	C3	Infection	s3w10	54.375	715.875	772	9.007
2020_01_21	No Parasitism	C3	Infection	s3w10	56.34	1181.79	1433	9.963
2020_01_21	No Parasitism	C3	Infection	s3w10	36.752	853.007	926	7.912
2020_01_21	No Parasitism	C3	Infection	s3w10	28.432	788.641	850	6.416
2020_01_21	No Parasitism	C3	Infection	s3w10	47.692	818.444	885	8.434
2020_01_21	No Parasitism	C3	Infection	s3w10	70.228	883.965	972	10.258
2020_01_21	No Parasitism	C3	Infection	s3w10	215.271	1227.85	2204	21.056
2020_01_21	No Parasitism	C3	Infection	s3w10	388.812	1072.98	2042	27.229
2020_01_21	No Parasitism	C3	Infection	s3w10	82.741	970.413	1275	10.906
2020_01_21	No Parasitism	C3	Infection	s3w10	38.39	726.683	792	7.392
2020_01_21	No Parasitism	C3	Infection	s3w10	34.852	757.474	804	7.161
2020_01_21	No Parasitism	C3	Infection	s3w10	84.641	962.75	1089	10.538
2020_01_21	No Parasitism	C3	Infection	s3w10	37.8	998.683	1114	6.937
2020_01_21	No Parasitism	C3	Infection	s3w10	43.762	878.828	993	7.728
2020_01_21	No Parasitism	C3	Infection	s3w10	49.265	794.868	911	8.176
2020_01_21	No Parasitism	C3	Infection	s3w10	41.927	753.344	801	8.688
2020_01_21	No Parasitism	C3	Infection	s3w10	91.127	725.959	786	11.021
2020_01_21	No Parasitism	C3	Infection	s3w10	57.781	798.553	896	8.697
2020_01_21	No Parasitism	C3	Infection	s3w10	31.708	769.099	818	8.255
2020_01_21	No Parasitism	C3	Infection	s3w10	55.619	748.305	811	9.503
2020_01_21	No Parasitism	C3	Infection	s3w10	61.908	747.735	1056	9.94
2020_01_21	No Parasitism	C3	Infection	s3w10	49.068	733.431	789	7.904
2020_01_21	No Parasitism	C3	Infection	s3w10	101.936	751.697	825	11.528
2020_01_21	No Parasitism	C3	Infection	s3w10	61.646	742.835	794	10.519
2020_01_21	No Parasitism	C3	Infection	s3w10	52.082	714.247	781	8.943
2020_01_21	No Parasitism	C3	Infection	s3w10	88.703	745.455	879	10.736
2020_01_21	No Parasitism	C3	Infection	s3w10	38.39	752.892	838	7.392
2020_01_21	No Parasitism	C3	Infection	s3w10	76.518	756.984	866	10.258
2020_01_21	No Parasitism	C3	Infection	s3w10	56.34	720.062	974	8.753
2020_01_21	No Parasitism	C3	Infection	s3w10	84.772	704.539	777	10.801
2020_01_21	No Parasitism	C3	Infection	s3w10	38.652	722.717	771	7.703
2020_01_21	No Parasitism	C3	Infection	s3w10	36.424	751.635	802	7.208
2020_01_21	No Parasitism	C3	Infection	s3w10	56.406	778.424	846	8.475
2020_01_21	No Parasitism	C3	Infection	s3w10	54.375	716.473	876	8.736
2020_01_21	No Parasitism	C3	Infection	s3w10	47.561	654.384	875	7.928
2020_01_21	No Parasitism	C3	Infection	s3w10	28.563	687.757	726	6.202
2020_01_21	No Parasitism	C3	Infection	s3w10	38.652	683.136	737	7.703
2020_01_21	No Parasitism	C3	Infection	s3w10	86.475	841.409	1047	11.282
2020_01_21	No Parasitism	C3	Infection	s3w10	64.463	789.302	868	10.008
2020_01_21	No Parasitism	C3	Infection	s3w10	60.795	785.954	866	9.189
2020_01_21	No Parasitism	C3	Infection	s3w10	41.796	823.614	989	7.935
2020_01_21	No Parasitism	C3	Infection	s3w10	32.035	661.202	705	6.962
2020_01_21	No Parasitism	C3	Infection	s3w10	26.074	665.153	738	5.871
2020_01_21	No Parasitism	C3	Infection	s3w10	30.79	675.743	724	6.672
2020_01_21	No Parasitism	C3	Infection	s3w10	121.459	723.961	964	15.291
2020_01_21	No Parasitism	C3	Infection	s3w10	72.194	699.636	835	13.79
2020_01_21	No Parasitism	C3	Infection	s3w10	77.697	747.451	820	12.768
2020_01_21	No Parasitism	C3	Infection	s3w10	119.493	773.377	1050	15.377
2020_01_21	No Parasitism	C3	Infection	s3w10	55.488	708.228	775	10.18
2020_01_21	No Parasitism	C3	Infection	s3w10	127.355	731.986	810	15.389
2020_01_21	No Parasitism	C3	Infection	s3w10	90.603	657.14	751	13.323
2020_01_21	No Parasitism	C3	Infection	s3w10	149.498	769.812	1239	14.418
2020_01_21	No Parasitism	C3	Infection	s3w10	49.592	735.594	855	9.537
2020_01_21	No Parasitism	C3	Infection	s3w10	1089.13	966.393	1449	43.738
2020_01_21	No Parasitism	C3	Infection	s3w10	1506.64	1084.66	1681	45.609
2020_01_21	No Parasitism	C3	Infection	s3w10	339.809	1067.2	1808	24.414
2020_01_21	No Parasitism	C3	Infection	s3w10	99.971	1161.5	1504	12.752
2020_01_21	No Parasitism	C3	Infection	s3w10	191.949	1054.04	2067	18.954
2020_01_21	No Parasitism	C3	Infection	s3w10	97.154	704.794	830	11.815
2020_01_21	No Parasitism	C3	Infection	s3w10	49.92	692.063	842	8.239
2020_01_21	High Parasitism	NSRef-3	No Infection	s6w3	38.521	478.874	540	7.955
2020_01_21	High Parasitism	NSRef-3	No Infection	s6w3	146.615	936.933	2413	14.84
2020_01_21	High Parasitism	NSRef-3	No Infection	s6w3	313.408	662.4	1977	21.028
2020_01_21	High Parasitism	NSRef-3	No Infection	s6w3	43.565	510.247	590	7.448
2020_01_21	High Parasitism	NSRef-3	No Infection	s6w3	53.195	753.187	1105	8.23
2020_01_21	High Parasitism	NSRef-3	No Infection	s6w3	285.238	760.361	1955	19.966
2020_01_21	High Parasitism	NSRef-3	No Infection	s6w3	133.971	755.571	1135	13.58
2020_01_21	High Parasitism	NSRef-3	No Infection	s6w3	47.955	712.999	1162	8.223
2020_01_21	High Parasitism	NSRef-3	No Infection	s6w3	121.197	630.064	1062	13.082
2020_01_21	High Parasitism	NSRef-3	No Infection	s6w3	72.325	533.188	681	10.009
2020_01_21	High Parasitism	NSRef-3	No Infection	s6w3	54.506	560.142	816	8.467
2020_01_21	High Parasitism	NSRef-3	No Infection	s6w3	144.65	550.289	737	14.349
2020_01_21	High Parasitism	NSRef-3	No Infection	s6w3	49.265	574.593	677	8.176
2020_01_21	High Parasitism	NSRef-3	No Infection	s6w3	115.3	609.656	1183	13.011
2020_01_21	High Parasitism	NSRef-3	No Infection	s6w3	252.351	571.874	855	17.925
2020_01_21	High Parasitism	NSRef-3	No Infection	s6w3	78.09	709.113	1894	10.792
2020_01_21	High Parasitism	NSRef-3	No Infection	s6w3	61.45	543.387	700	8.955
2020_01_21	High Parasitism	NSRef-3	No Infection	s6w3	70.753	460.613	522	9.745
2020_01_21	High Parasitism	NSRef-3	No Infection	s6w3	85.951	528.912	1225	10.678
2020_01_21	High Parasitism	NSRef-3	No Infection	s6w3	30.528	430.494	549	6.878
2020_01_21	High Parasitism	NSRef-3	No Infection	s6w3	37.735	505.589	746	7.154
2020_01_21	High Parasitism	NSRef-3	No Infection	s6w3	37.735	555.842	647	7.154
2020_01_21	High Parasitism	NSRef-3	No Infection	s6w3	61.908	521.417	901	9.94
2020_01_21	High Parasitism	NSRef-3	No Infection	s6w3	49.33	945.74	1662	8.437
2020_01_21	High Parasitism	NSRef-3	No Infection	s6w3	61.908	531.051	710	9.94
2020_01_21	High Parasitism	NSRef-3	No Infection	s6w3	26.074	510.01	586	5.871
2020_01_21	High Parasitism	NSRef-3	No Infection	s6w3	258.967	769.539	1229	23.002
2020_01_21	High Parasitism	NSRef-3	No Infection	s6w3	99.643	444.869	584	12.014
2020_01_21	High Parasitism	NSRef-3	No Infection	s6w3	41.665	472.263	527	7.887
2020_01_21	High Parasitism	NSRef-3	No Infection	s6w3	75.338	580.153	1948	10.529
2020_01_21	High Parasitism	NSRef-3	No Infection	s6w3	57.716	539.701	651	10.748
2020_01_21	High Parasitism	NSRef-3	No Infection	s6w3	224.967	975.904	2648	20.151
2020_01_21	High Parasitism	NSRef-3	No Infection	s6w3	40.552	492.931	729	8.088
2020_01_21	High Parasitism	NSRef-3	No Infection	s6w3	136.461	855.549	1336	14.08
2020_01_21	High Parasitism	NSRef-3	No Infection	s6w3	39.962	450.402	505	7.933
2020_01_21	High Parasitism	NSRef-3	No Infection	s6w3	43.827	814.661	1228	7.669
2020_01_21	High Parasitism	NSRef-3	No Infection	s6w3	32.821	544.79	626	9.647
2020_01_21	High Parasitism	NSRef-3	No Infection	s6w3	96.04	691.924	1077	12.218
2020_01_21	High Parasitism	NSRef-3	No Infection	s6w3	196.011	615.85	1083	18.041
2020_01_21	High Parasitism	NSRef-3	No Infection	s6w3	95.254	670.718	1051	14.486
2020_01_21	High Parasitism	NSRef-3	No Infection	s6w3	210.358	1143.22	2700	20.494
2020_01_21	High Parasitism	NSRef-3	No Infection	s6w3	33.673	529.444	794	6.658
2020_01_21	High Parasitism	NSRef-3	No Infection	s6w3	68.132	591.406	675	10.243
2020_01_21	High Parasitism	NSRef-3	No Infection	s6w3	71.932	626.75	1073	10.528
2020_01_21	High Parasitism	NSRef-3	No Infection	s6w3	64.463	573.112	839	10.008
2020_01_21	High Parasitism	NSRef-3	No Infection	s6w3	36.424	532.09	603	7.208
2020_01_21	High Parasitism	NSRef-3	No Infection	s6w3	50.051	522.606	669	8.928
2020_01_21	High Parasitism	NSRef-3	No Infection	s6w3	35.049	510.656	579	6.948
2020_01_21	High Parasitism	NSRef-3	No Infection	s6w3	35.049	479.43	529	6.948
2020_01_21	High Parasitism	NSRef-3	No Infection	s6w3	42.452	509.159	625	8.16
2020_01_21	High Parasitism	NSRef-3	No Infection	s6w3	34.852	586.122	659	7.161
2020_01_21	High Parasitism	NSRef-3	No Infection	s6w3	33.542	569.154	785	7.233
2020_01_21	High Parasitism	NSRef-3	No Infection	s6w3	144.453	630.626	1761	14.076
2020_01_21	High Parasitism	NSRef-3	No Infection	s6w3	32.035	584.667	722	6.962
2020_01_21	High Parasitism	NSRef-3	No Infection	s6w3	60.664	567.769	811	9.732
2020_01_21	High Parasitism	NSRef-3	No Infection	s6w3	38.783	399.605	493	7.164
2020_01_21	High Parasitism	NSRef-3	No Infection	s6w3	50.706	445.205	630	8.673
2020_01_21	High Parasitism	NSRef-3	No Infection	s6w3	54.375	499.117	860	8.736
2020_01_21	High Parasitism	NSRef-3	No Infection	s6w3	456.288	611.282	1008	27.992
2020_01_21	High Parasitism	NSRef-3	No Infection	s6w3	181.86	663.449	1427	18.151
2020_01_21	High Parasitism	NSRef-3	No Infection	s6w3	307.97	663.505	1778	28.806
2020_01_21	High Parasitism	NSRef-3	No Infection	s6w3	79.597	1409.46	4095	13.206
2020_01_21	High Parasitism	NSRef-3	No Infection	s6w3	159.259	790.179	2462	17.657
2020_01_21	No Parasitism	C1	No Infection	s1w3	49.265	722.678	833	8.176
2020_01_21	No Parasitism	C1	No Infection	s1w3	84.248	619.842	699	11.027
2020_01_21	No Parasitism	C1	No Infection	s1w3	123.489	594.018	670	12.539
2020_01_21	No Parasitism	C1	No Infection	s1w3	88.703	578.329	639	10.736
2020_01_21	No Parasitism	C1	No Infection	s1w3	59.747	559.561	611	8.722
2020_01_21	No Parasitism	C1	No Infection	s1w3	43.565	586.624	663	7.448
2020_01_21	No Parasitism	C1	No Infection	s1w3	60.533	701.484	844	9.45
2020_01_21	No Parasitism	C1	No Infection	s1w3	50.706	603.379	663	8.673
2020_01_21	No Parasitism	C1	No Infection	s1w3	64.857	631.419	691	9.729
2020_01_21	No Parasitism	C1	No Infection	s1w3	66.036	592.384	660	10.275
2020_01_21	No Parasitism	C1	No Infection	s1w3	80.71	692.027	764	10.289
2020_01_21	No Parasitism	C1	No Infection	s1w3	60.795	704.21	895	9.189
2020_01_21	No Parasitism	C1	No Infection	s1w3	45.203	706.352	811	7.714
2020_01_21	No Parasitism	C1	No Infection	s1w3	95.385	699.723	842	11.28
2020_01_21	No Parasitism	C1	No Infection	s1w3	54.375	690.931	793	8.736
2020_01_21	No Parasitism	C1	No Infection	s1w3	54.375	722.686	808	9.007
2020_01_21	No Parasitism	C1	No Infection	s1w3	93.158	640.459	832	11.051
2020_01_21	No Parasitism	C1	No Infection	s1w3	51.099	801.392	968	8.175
2020_01_21	No Parasitism	C1	No Infection	s1w3	80.317	639.94	720	10.512
2020_01_21	No Parasitism	C1	No Infection	s1w3	70.753	708.11	1046	9.745
2020_01_21	No Parasitism	C1	No Infection	s1w3	47.955	579.443	650	8.223
2020_01_21	No Parasitism	C1	No Infection	s1w3	59.681	584.141	723	8.938
2020_01_21	No Parasitism	C1	No Infection	s1w3	51.099	698.374	1090	8.175
2020_01_21	No Parasitism	C1	No Infection	s1w3	41.796	730.335	871	7.935
2020_01_21	No Parasitism	C1	No Infection	s1w3	60.533	720.365	880	9.45
2020_01_21	No Parasitism	C1	No Infection	s1w3	72.456	477.514	545	9.77
2020_01_21	No Parasitism	C1	No Infection	s1w3	65.774	482.818	570	11.26
2020_01_21	No Parasitism	C1	No Infection	s1w3	86.475	606.162	692	11.282
2020_01_21	No Parasitism	C1	No Infection	s1w3	86.475	636.345	769	11.282
2020_01_21	No Parasitism	C1	No Infection	s1w3	116.349	773.85	1021	12.302
2020_01_21	No Parasitism	C1	No Infection	s1w3	84.117	572.7	629	11.268
2020_01_21	No Parasitism	C1	No Infection	s1w3	111.37	657.456	766	12.563
2020_01_21	No Parasitism	C1	No Infection	s1w3	76.125	681.48	765	9.954
2020_01_21	No Parasitism	C1	No Infection	s1w3	49.265	721.88	854	8.679
2020_01_21	No Parasitism	C1	No Infection	s1w3	49.265	632.355	686	8.176
2020_01_21	No Parasitism	C1	No Infection	s1w3	35.049	631.404	690	6.948
2020_01_21	No Parasitism	C1	No Infection	s1w3	73.57	777.699	948	11.06
2020_01_21	No Parasitism	C1	No Infection	s1w3	45.858	563.787	615	8.704
2020_01_21	No Parasitism	C1	No Infection	s1w3	559.797	972.667	3332	32.218
2020_01_21	No Parasitism	C1	No Infection	s1w3	45.072	631.766	722	7.997
2020_01_21	No Parasitism	C1	No Infection	s1w3	45.793	734.369	929	9.496
2020_01_21	No Parasitism	C1	No Infection	s1w3	54.506	659.637	732	8.467
2020_01_21	No Parasitism	C1	No Infection	s1w3	46.579	686.311	859	7.951
2020_01_21	No Parasitism	C1	No Infection	s1w3	32.035	661.464	728	6.387
2020_01_21	No Parasitism	C1	No Infection	s1w3	47.692	686.49	800	8.434
2020_01_21	No Parasitism	C1	No Infection	s1w3	95.385	653.001	788	11.28
2020_01_21	No Parasitism	C1	No Infection	s1w3	100.691	611.479	679	14.447
2020_01_21	No Parasitism	C1	No Infection	s1w3	76.518	624.818	755	10.258
2020_01_21	No Parasitism	C1	No Infection	s1w3	47.692	618.771	714	8.434
2020_01_21	No Parasitism	C1	No Infection	s1w3	33.28	678.187	873	6.888
2020_01_21	No Parasitism	C1	Infection	s1w11	86.541	1102.86	1342	11.045
2020_01_21	No Parasitism	C1	Infection	s1w11	47.561	991.625	1076	7.928
2020_01_21	No Parasitism	C1	Infection	s1w11	128.599	1295.79	1591	16.411
2020_01_21	No Parasitism	C1	Infection	s1w11	106.26	1207.21	1507	17.187
2020_01_21	No Parasitism	C1	Infection	s1w11	165.286	1254.61	1581	17.626
2020_01_21	No Parasitism	C1	Infection	s1w11	64.005	1021.2	1143	10.31
2020_01_21	No Parasitism	C1	Infection	s1w11	63.35	1052.74	1155	9.931
2020_01_21	No Parasitism	C1	Infection	s1w11	84.772	1179.6	1466	11.609
2020_01_21	No Parasitism	C1	Infection	s1w11	441.417	1273.85	1928	36.458
2020_01_21	No Parasitism	C1	Infection	s1w11	92.895	1051.24	1413	11.842
2020_01_21	No Parasitism	C1	Infection	s1w11	125.913	1102.01	1218	15.034
2020_01_21	No Parasitism	C1	Infection	s1w11	150.284	1236.8	1572	16.195
2020_01_21	No Parasitism	C1	Infection	s1w11	1248.78	1295.09	4095	51.095
2020_01_21	No Parasitism	C1	Infection	s1w11	68.787	953.989	1037	10.028
2020_01_21	No Parasitism	C1	Infection	s1w11	59.681	1029.36	1223	8.938
2020_01_21	No Parasitism	C1	Infection	s1w11	81.955	992.527	1058	11.009
2020_01_21	No Parasitism	C1	Infection	s1w11	82.545	848.956	940	10.784
2020_01_21	No Parasitism	C1	Infection	s1w11	47.955	847.643	919	8.223
2020_01_21	No Parasitism	C1	Infection	s1w11	724.362	1002.91	1628	36.195
2020_01_21	No Parasitism	C1	Infection	s1w11	160.897	1152.7	1382	17.436
2020_01_21	No Parasitism	C1	Infection	s1w11	79.335	1086.7	1419	13.11
2020_01_21	No Parasitism	C1	Infection	s1w11	357.759	1368.04	2230	42.496
2020_01_21	No Parasitism	C1	Infection	s1w11	259.098	1103.58	1485	28.369
2020_01_21	No Parasitism	C1	Infection	s1w11	54.506	972.546	1054	8.467
2020_01_21	No Parasitism	C1	Infection	s1w11	51.296	905.287	986	9.481
2020_01_21	No Parasitism	C1	Infection	s1w11	97.481	814.511	907	11.258
2020_01_21	No Parasitism	C1	Infection	s1w11	96.237	1056.76	1306	12.89
2020_01_21	No Parasitism	C1	Infection	s1w11	59.419	1005.49	1193	9.52
2020_01_21	No Parasitism	C1	Infection	s1w11	375.709	1549.61	2288	26.77
2020_01_21	No Parasitism	C1	Infection	s1w11	57.912	952.997	1013	8.967
2020_01_21	No Parasitism	C1	Infection	s1w11	82.807	1056.27	1168	10.268
2020_01_21	No Parasitism	C1	Infection	s1w11	46.906	1027.5	1101	7.728
2020_01_21	No Parasitism	C1	Infection	s1w11	354.614	1841.11	2931	24.341
2020_01_21	No Parasitism	C1	Infection	s1w11	151.921	1299.18	1655	17.543
2020_01_21	No Parasitism	C1	Infection	s1w11	447.837	1302.88	2265	30.411
2020_01_21	No Parasitism	C1	Infection	s1w11	164.369	1573.58	2319	16.796
2020_01_21	No Parasitism	C1	Infection	s1w11	65.119	1056.81	1374	9.517
2020_01_21	No Parasitism	C1	Infection	s1w11	102.984	1018.47	1117	12.802
2020_01_21	No Parasitism	C1	Infection	s1w11	50.706	1000.63	1136	8.673
2020_01_21	No Parasitism	C1	Infection	s1w11	153.166	865.234	952	14.074
2020_01_21	No Parasitism	C1	Infection	s1w11	62.171	1077.25	1328	11.415
2020_01_21	No Parasitism	C1	Infection	s1w11	111.37	1626.52	2412	12.563
2020_01_21	No Parasitism	C1	Infection	s1w11	30.79	1402.92	1651	6.672
2020_01_21	No Parasitism	C1	Infection	s1w11	281.176	1614.51	2522	27.466
2020_01_21	No Parasitism	C1	Infection	s1w11	439.452	1038.96	1697	29.292
2020_01_21	No Parasitism	C1	Infection	s1w11	619.216	1193.8	1848	30.158
2020_01_21	No Parasitism	C1	Infection	s1w11	111.37	858.405	940	12.563
2020_01_21	No Parasitism	C1	Infection	s1w11	68.918	856.784	956	9.489
2020_01_21	No Parasitism	C1	Infection	s1w11	42.452	757.569	805	8.16
2020_01_21	No Parasitism	C1	Infection	s1w11	26.074	815.867	873	5.871
2020_01_21	No Parasitism	C1	Infection	s1w11	181.926	917.049	1089	19.247
2020_01_21	No Parasitism	C1	Infection	s1w11	28.432	760.776	819	6.416
2020_01_21	No Parasitism	C1	Infection	s1w11	88.31	717.396	860	10.963
2020_01_21	No Parasitism	C1	Infection	s1w11	41.927	693.275	731	7.456
2020_01_21	No Parasitism	C1	Infection	s1w11	86.017	1354.37	1845	10.465
2020_01_21	No Parasitism	C1	Infection	s1w11	83.658	1702.96	2589	12.259
2020_01_21	No Parasitism	C1	Infection	s1w11	79.924	950.84	1439	11.025
2020_01_21	No Parasitism	C1	Infection	s1w11	53.457	890.868	1012	9.488
2020_01_21	No Parasitism	C1	Infection	s1w11	101.543	953.836	1196	11.749
2020_01_21	No Parasitism	C1	Infection	s1w11	188.936	981.873	1273	15.625
2020_01_21	No Parasitism	C1	Infection	s1w11	80.186	1221.48	1629	13.507
2020_01_21	No Parasitism	C1	Infection	s1w11	46.382	765.072	818	8.222
2020_01_21	No Parasitism	C1	Infection	s1w11	51.296	785.179	879	9.481
2020_01_21	No Parasitism	C1	Infection	s1w11	164.303	1220.79	1573	14.58
2020_01_21	No Parasitism	C1	Infection	s1w11	74.356	851.488	926	10.023
2020_01_21	No Parasitism	C1	Infection	s1w11	56.34	829.757	1247	8.753
2020_01_21	No Parasitism	C1	Infection	s1w11	101.936	893.022	1107	11.528
2020_01_21	No Parasitism	C1	Infection	s1w11	173.213	888.589	1072	15.36
2020_01_21	No Parasitism	C1	Infection	s1w11	1268.31	1200.95	1857	43.237
2020_01_21	No Parasitism	C1	Infection	s1w11	149.825	1026.99	1541	16.747
2020_01_21	No Parasitism	C1	Infection	s1w11	126.896	854.193	1051	15.586
2020_01_21	No Parasitism	C1	Infection	s1w11	88.703	819.897	896	10.736
2020_01_21	No Parasitism	C1	Infection	s1w11	97.219	1127.65	1416	12.063
2020_01_21	No Parasitism	C2	No Infection	s2w3	80.71	603.417	687	10.289
2020_01_21	No Parasitism	C2	No Infection	s2w3	97.481	714.405	775	11.258
2020_01_21	No Parasitism	C2	No Infection	s2w3	95.188	684.076	744	11.552
2020_01_21	No Parasitism	C2	No Infection	s2w3	137.509	698.694	772	14.574
2020_01_21	No Parasitism	C2	No Infection	s2w3	147.27	695.039	803	14.348
2020_01_21	No Parasitism	C2	No Infection	s2w3	117.397	650.682	716	13.622
2020_01_21	No Parasitism	C2	No Infection	s2w3	73.439	610.684	672	10.508
2020_01_21	No Parasitism	C2	No Infection	s2w3	72.128	588.217	730	10.365
2020_01_21	No Parasitism	C2	No Infection	s2w3	60.402	570.187	829	9.948
2020_01_21	No Parasitism	C2	No Infection	s2w3	94.075	623.989	738	12.428
2020_01_21	No Parasitism	C2	No Infection	s2w3	65.512	629.145	706	9.8
2020_01_21	No Parasitism	C2	No Infection	s2w3	56.143	645.137	737	8.967
2020_01_21	No Parasitism	C2	No Infection	s2w3	45.203	658.625	840	7.714
2020_01_21	No Parasitism	C2	No Infection	s2w3	47.692	648.077	741	8.434
2020_01_21	No Parasitism	C2	No Infection	s2w3	54.506	656.906	730	8.467
2020_01_21	No Parasitism	C2	No Infection	s2w3	66.429	657.554	720	11.007
2020_01_21	No Parasitism	C2	No Infection	s2w3	46.382	624.445	676	8.222
2020_01_21	No Parasitism	C2	No Infection	s2w3	78.679	693.396	772	10.009
2020_01_21	No Parasitism	C2	No Infection	s2w3	45.203	693.422	764	7.714
2020_01_21	No Parasitism	C2	No Infection	s2w3	172.361	675.262	803	15.492
2020_01_21	No Parasitism	C2	No Infection	s2w3	39.635	707.944	769	8.897
2020_01_21	No Parasitism	C2	No Infection	s2w3	64.267	698.727	769	9.406
2020_01_21	No Parasitism	C2	No Infection	s2w3	95.254	705.25	775	12.563
2020_01_21	No Parasitism	C2	No Infection	s2w3	61.45	760.483	867	8.955
2020_01_21	No Parasitism	C2	No Infection	s2w3	46.906	639.318	682	7.728
2020_01_21	No Parasitism	C2	No Infection	s2w3	52.802	644.117	700	9.637
2020_01_21	No Parasitism	C2	No Infection	s2w3	49.789	633.216	698	9.193
2020_01_21	No Parasitism	C2	No Infection	s2w3	118.511	637.899	716	15.113
2020_01_21	No Parasitism	C2	No Infection	s2w3	152.511	620.074	682	14.306
2020_01_21	No Parasitism	C2	No Infection	s2w3	79.138	628.223	687	12.272
2020_01_21	No Parasitism	C2	No Infection	s2w3	64.725	630.116	721	9.22
2020_01_21	No Parasitism	C2	No Infection	s2w3	79.924	620.13	676	11.025
2020_01_21	No Parasitism	C2	No Infection	s2w3	72.325	681.389	784	10.009
2020_01_21	No Parasitism	C2	No Infection	s2w3	50.051	639.584	701	10.316
2020_01_21	No Parasitism	C2	No Infection	s2w3	129.123	632.169	702	13.063
2020_01_21	No Parasitism	C2	No Infection	s2w3	116.807	646.859	741	14.09
2020_01_21	No Parasitism	C2	No Infection	s2w3	47.955	657.445	715	8.223
2020_01_21	No Parasitism	C2	No Infection	s2w3	54.506	590.97	632	8.467
2020_01_21	No Parasitism	C2	No Infection	s2w3	30.921	707.364	787	6.384
2020_01_21	No Parasitism	C2	No Infection	s2w3	95.909	679.423	746	12.943
2020_01_21	No Parasitism	C2	No Infection	s2w3	150.153	564.857	630	14.879
2020_01_21	No Parasitism	C2	No Infection	s2w3	74.421	627.974	681	11.522
2020_01_21	No Parasitism	C2	No Infection	s2w3	99.512	641.173	709	14.669
2020_01_21	No Parasitism	C2	No Infection	s2w3	52.868	586.905	705	8.444
2020_01_21	No Parasitism	C2	No Infection	s2w3	36.555	599.563	658	6.991
2020_01_21	No Parasitism	C2	No Infection	s2w3	54.899	609.196	695	10.487
2020_01_21	No Parasitism	C2	No Infection	s2w3	42.517	637.442	685	8.491
2020_01_21	No Parasitism	C2	No Infection	s2w3	60.664	598.732	663	9.732
2020_01_21	No Parasitism	C2	No Infection	s2w3	118.183	580.588	632	12.811
2020_01_21	No Parasitism	C2	No Infection	s2w3	32.363	652.417	696	8.129
2020_01_21	No Parasitism	C2	No Infection	s2w3	62.105	648.816	735	10.654
2020_01_21	No Parasitism	C2	No Infection	s2w3	41.076	662.769	747	10.9
2020_01_21	No Parasitism	C2	No Infection	s2w3	49.068	667.543	747	7.904
2020_01_21	No Parasitism	C2	No Infection	s2w3	38.39	782.162	968	7.392
2020_01_21	No Parasitism	C2	No Infection	s2w3	46.382	636.492	856	8.222
2020_01_21	No Parasitism	C2	No Infection	s2w3	56.34	685.627	865	9.279
2020_01_21	No Parasitism	C2	No Infection	s2w3	65.119	648.829	709	9.517
2020_01_21	No Parasitism	C2	No Infection	s2w3	68.787	626.404	715	9.704
2020_01_21	No Parasitism	C2	No Infection	s2w3	68.918	615.658	687	9.489
2020_01_21	No Parasitism	C2	No Infection	s2w3	88.572	606.03	774	11.303
2020_01_21	No Parasitism	C2	No Infection	s2w3	68.787	616.967	731	9.704
2020_01_21	No Parasitism	C2	No Infection	s2w3	52.409	716.811	872	8.736
2020_01_21	No Parasitism	C2	No Infection	s2w3	56.34	593.263	691	8.753
2020_01_21	No Parasitism	C2	No Infection	s2w3	64.463	675.36	788	10.008
2020_01_21	No Parasitism	C2	No Infection	s2w3	54.375	640.773	738	8.736
2020_01_21	No Parasitism	C2	No Infection	s2w3	37.866	578.292	625	8.546
2020_01_21	No Parasitism	C2	No Infection	s2w3	32.625	624.859	781	7.637
2020_01_21	No Parasitism	C2	No Infection	s2w3	62.629	552.642	607	9.721
2020_01_21	No Parasitism	C2	No Infection	s2w3	76.125	729.497	970	9.954
2020_01_21	No Parasitism	C2	No Infection	s2w3	88.179	605.443	708	11.513
2020_01_21	No Parasitism	C2	No Infection	s2w3	33.673	623.531	756	6.658
2020_01_21	No Parasitism	C2	No Infection	s2w3	99.709	632.922	696	13.076
2020_01_21	No Parasitism	C2	No Infection	s2w3	48.479	583.601	631	9.246
2020_01_21	No Parasitism	C2	No Infection	s2w3	158.669	632.683	711	14.61
2020_01_21	No Parasitism	C2	No Infection	s2w3	89.882	624.364	697	11.792
2020_01_21	No Parasitism	C2	No Infection	s2w3	133.12	663.945	763	14.325
2020_01_21	No Parasitism	C2	No Infection	s2w3	71.08	658.345	718	9.513
2020_01_21	No Parasitism	C2	No Infection	s2w3	157.228	534.472	586	15.325
2020_01_21	No Parasitism	C2	No Infection	s2w3	54.375	705.917	814	8.736
2020_01_21	No Parasitism	C2	No Infection	s2w3	47.955	710.902	1006	8.223
2020_01_21	No Parasitism	C2	No Infection	s2w3	111.37	531.058	585	12.563
2020_01_21	No Parasitism	C2	No Infection	s2w3	44.548	539.412	584	8.226
2020_01_21	No Parasitism	C2	No Infection	s2w3	49.068	688.308	787	7.904
2020_01_21	No Parasitism	C2	No Infection	s2w3	29.284	670.477	740	6.894
2020_01_21	No Parasitism	C2	No Infection	s2w3	50.706	645.632	695	8.673
2020_01_21	No Parasitism	C2	No Infection	s2w3	62.629	637.482	680	9.721
2020_01_21	No Parasitism	C2	No Infection	s2w3	51.23	636.26	687	8.448
2020_01_21	No Parasitism	C2	No Infection	s2w3	38.783	698.495	793	7.164
2020_01_21	No Parasitism	C2	No Infection	s2w3	36.424	729.101	801	7.208
2020_01_21	No Parasitism	C2	No Infection	s2w3	76.518	636.943	750	10.258
2020_01_21	No Parasitism	C2	No Infection	s2w3	49.33	615.993	664	8.437
2020_01_21	No Parasitism	C2	No Infection	s2w3	74.356	576.669	701	10.023
2020_01_21	No Parasitism	C2	Infection	s2w11	482.755	1928.52	3775	28.862
2020_01_21	No Parasitism	C2	Infection	s2w11	57.781	668.684	953	8.697
2020_01_21	No Parasitism	C2	Infection	s2w11	93.158	630.624	774	11.051
2020_01_21	No Parasitism	C2	Infection	s2w11	88.179	755.204	919	11.513
2020_01_21	No Parasitism	C2	Infection	s2w11	84.641	656.18	716	10.538
2020_01_21	No Parasitism	C2	Infection	s2w11	74.356	715.651	957	10.023
2020_01_21	No Parasitism	C2	Infection	s2w11	51.099	699.441	857	8.175
2020_01_21	No Parasitism	C2	Infection	s2w11	72.194	850.787	1449	11.512
2020_01_21	No Parasitism	C2	Infection	s2w11	82.217	734.5	842	13
2020_01_21	No Parasitism	C2	Infection	s2w11	55.554	788.179	1088	10.889
2020_01_21	No Parasitism	C2	Infection	s2w11	41.796	657.914	718	7.67
2020_01_21	No Parasitism	C2	Infection	s2w11	68.918	648.702	735	9.489
2020_01_21	No Parasitism	C2	Infection	s2w11	73.635	693.802	791	9.683
2020_01_21	No Parasitism	C2	Infection	s2w11	91.127	699.152	804	11.021
2020_01_21	No Parasitism	C2	Infection	s2w11	84.641	635.038	753	10.538
2020_01_21	No Parasitism	C2	Infection	s2w11	74.356	599.246	734	11.014
2020_01_21	No Parasitism	C2	Infection	s2w11	54.506	655.74	722	8.467
2020_01_21	No Parasitism	C2	Infection	s2w11	66.036	641.076	850	10.275
2020_01_21	No Parasitism	C2	Infection	s2w11	48.872	663.371	807	9.719
2020_01_21	No Parasitism	C2	Infection	s2w11	95.385	643.965	768	11.28
2020_01_21	No Parasitism	C2	Infection	s2w11	115.694	645.907	879	12.802
2020_01_21	No Parasitism	C2	Infection	s2w11	123.686	673.889	892	12.793
2020_01_21	No Parasitism	C2	Infection	s2w11	120.541	613.558	773	14.319
2020_01_21	No Parasitism	C2	Infection	s2w11	121.393	570.893	682	14.924
2020_01_21	No Parasitism	C2	Infection	s2w11	65.774	689.543	838	11.26
2020_01_21	No Parasitism	C2	Infection	s2w11	40.355	686.584	753	7.168
2020_01_21	No Parasitism	C2	Infection	s2w11	41.927	665.737	734	7.456
2020_01_21	No Parasitism	C2	Infection	s2w11	47.561	706.23	819	7.928
2020_01_21	No Parasitism	C2	Infection	s2w11	46.579	662.842	718	7.951
2020_01_21	No Parasitism	C2	Infection	s2w11	62.76	644.767	776	10.779
2020_01_21	No Parasitism	C2	Infection	s2w11	66.822	654.477	875	9.224
2020_01_21	No Parasitism	C2	Infection	s2w11	86.737	679.428	768	12.307
2020_01_21	No Parasitism	C2	Infection	s2w11	402.962	936.636	1369	31.168
2020_01_21	No Parasitism	C2	Infection	s2w11	782.143	2024.05	3898	32.483
2020_01_21	No Parasitism	C2	Infection	s2w11	59.091	765.289	1148	10.496
2020_01_21	No Parasitism	C2	Infection	s2w11	72.652	841.073	1345	11.889
2020_01_21	No Parasitism	C2	Infection	s2w11	87.982	820.26	1505	11.329
2020_01_21	No Parasitism	C2	Infection	s2w11	49.265	724.379	851	8.176
2020_01_21	No Parasitism	C2	Infection	s2w11	60.795	641.831	751	9.189
2020_01_21	No Parasitism	C2	Infection	s2w11	70.753	651.887	761	9.745
2020_01_21	No Parasitism	C2	Infection	s2w11	60.664	596.473	664	9.732
2020_01_21	No Parasitism	C2	Infection	s2w11	41.927	688.552	790	7.456
2020_01_21	No Parasitism	C2	Infection	s2w11	51.885	598.165	756	9.199
2020_01_21	No Parasitism	C2	Infection	s2w11	37.8	605.847	770	6.937
2020_01_21	No Parasitism	C2	Infection	s2w11	71.67	785.089	959	10.782
2020_01_21	No Parasitism	C2	Infection	s2w11	53.195	594.355	676	8.23
2020_01_21	No Parasitism	C2	Infection	s2w11	57.912	624.118	720	9.227
2020_01_21	No Parasitism	C2	Infection	s2w11	33.411	597.457	644	8.505
2020_01_21	No Parasitism	C2	Infection	s2w11	67.084	597.604	653	9.751
2020_01_21	No Parasitism	C2	Infection	s2w11	64.725	623.168	725	9.22
2020_01_21	No Parasitism	C2	Infection	s2w11	93.158	517.691	576	11.051
2020_01_21	No Parasitism	C2	Infection	s2w11	78.614	679.931	797	10.226
2020_01_21	No Parasitism	C2	Infection	s2w11	92.502	634.59	745	11.522
2020_01_21	No Parasitism	C2	Infection	s2w11	64.725	754.017	1020	9.22
2020_01_21	No Parasitism	C2	Infection	s2w11	62.891	711.921	1142	9.246
2020_01_21	No Parasitism	C2	Infection	s2w11	46.906	621.155	670	7.728
2020_01_21	No Parasitism	C2	Infection	s2w11	40.028	632.462	701	7.939
2020_01_21	No Parasitism	C2	Infection	s2w11	71.015	645.756	838	10.983
2020_01_21	No Parasitism	C2	Infection	s2w11	64.463	615.046	668	10.008
2020_01_21	No Parasitism	C2	Infection	s2w11	45.203	618.636	820	7.714
2020_01_21	No Parasitism	C2	Infection	s2w11	41.927	603.106	671	7.456
2020_01_21	No Parasitism	C2	Infection	s2w11	71.932	628.445	754	10.528
2020_01_21	No Parasitism	C2	Infection	s2w11	52.409	553.976	606	8.736
2020_01_21	High Parasitism	NSRef-1	No Infection	s4w3	56.406	556.98	612	8.475
2020_01_21	High Parasitism	NSRef-1	No Infection	s4w3	46.317	575.504	681	8.498
2020_01_21	High Parasitism	NSRef-1	No Infection	s4w3	51.885	547.328	716	9.199
2020_01_21	High Parasitism	NSRef-1	No Infection	s4w3	56.143	550.789	652	8.967
2020_01_21	High Parasitism	NSRef-1	No Infection	s4w3	45.203	579.593	735	7.714
2020_01_21	High Parasitism	NSRef-1	No Infection	s4w3	33.673	576.63	634	6.658
2020_01_21	High Parasitism	NSRef-1	No Infection	s4w3	27.056	584.908	695	6.373
2020_01_21	High Parasitism	NSRef-1	No Infection	s4w3	30.528	595.532	673	6.878
2020_01_21	High Parasitism	NSRef-1	No Infection	s4w3	47.955	552.328	620	8.223
2020_01_21	High Parasitism	NSRef-1	No Infection	s4w3	71.08	572.361	667	9.513
2020_01_21	High Parasitism	NSRef-1	No Infection	s4w3	90.668	1260.23	1856	12.536
2020_01_21	High Parasitism	NSRef-1	No Infection	s4w3	43.762	577.515	655	7.728
2020_01_21	High Parasitism	NSRef-1	No Infection	s4w3	51.23	588.246	748	8.448
2020_01_21	High Parasitism	NSRef-1	No Infection	s4w3	47.955	599.003	725	8.223
2020_01_21	High Parasitism	NSRef-1	No Infection	s4w3	43.565	585.471	665	7.448
2020_01_21	High Parasitism	NSRef-1	No Infection	s4w3	41.927	590.462	668	7.456
2020_01_21	High Parasitism	NSRef-1	No Infection	s4w3	27.056	605.245	692	6.373
2020_01_21	High Parasitism	NSRef-1	No Infection	s4w3	40.028	578.434	641	7.399
2020_01_21	High Parasitism	NSRef-1	No Infection	s4w3	33.28	613.593	714	6.888
2020_01_21	High Parasitism	NSRef-1	No Infection	s4w3	114.252	609.531	706	12.308
2020_01_21	High Parasitism	NSRef-1	No Infection	s4w3	184.219	1552.11	4049	20.859
2020_01_21	High Parasitism	NSRef-1	No Infection	s4w3	30.921	577.788	715	6.384
2020_01_21	High Parasitism	NSRef-1	No Infection	s4w3	46.382	578.73	671	8.222
2020_01_21	High Parasitism	NSRef-1	No Infection	s4w3	36.555	528.023	625	6.991
2020_01_21	High Parasitism	NSRef-1	No Infection	s4w3	32.035	628.342	796	6.962
2020_01_21	High Parasitism	NSRef-1	No Infection	s4w3	57.912	562.4	635	9.227
2020_01_21	High Parasitism	NSRef-1	No Infection	s4w3	56.34	599.906	716	9.963
2020_01_21	High Parasitism	NSRef-1	No Infection	s4w3	33.28	638.321	751	6.888
2020_01_21	High Parasitism	NSRef-1	No Infection	s4w3	36.687	919.452	1209	8.255
2020_01_21	High Parasitism	NSRef-1	No Infection	s4w3	37.8	1097.66	1638	7.483
2020_01_21	High Parasitism	NSRef-1	No Infection	s4w3	38.652	805.68	1189	7.703
2020_01_21	High Parasitism	NSRef-1	No Infection	s4w3	31.053	630.502	706	8.488
2020_01_21	High Parasitism	NSRef-1	No Infection	s4w3	33.149	608.213	691	7.44
2020_01_21	High Parasitism	NSRef-1	No Infection	s4w3	44.155	540.911	754	8.431
2020_01_21	High Parasitism	NSRef-1	No Infection	s4w3	59.485	530.506	667	9.222
2020_01_21	High Parasitism	NSRef-1	No Infection	s4w3	1212.1	1706.11	4095	51.132
2020_01_21	High Parasitism	NSRef-1	No Infection	s4w3	28.432	916.634	1145	6.416
2020_01_21	High Parasitism	NSRef-1	No Infection	s4w3	51.23	631.523	797	8.448
2020_01_21	High Parasitism	NSRef-1	No Infection	s4w3	29.611	664.184	817	6.642
2020_01_21	High Parasitism	NSRef-1	No Infection	s4w3	46.579	641.865	801	7.951
2020_01_21	High Parasitism	NSRef-1	No Infection	s4w3	84.641	610.55	724	10.538
2020_01_21	High Parasitism	NSRef-1	No Infection	s4w3	31.249	649.608	832	7.365
2020_01_21	High Parasitism	NSRef-1	No Infection	s4w3	36.162	649.763	813	7.42
2020_01_21	High Parasitism	NSRef-1	No Infection	s4w3	69.442	605.49	751	10.773
2020_01_21	High Parasitism	NSRef-1	No Infection	s4w3	43.762	617.061	724	7.728
2020_01_21	High Parasitism	NSRef-1	No Infection	s4w3	68.918	622.26	725	9.489
2020_01_21	High Parasitism	NSRef-1	No Infection	s4w3	62.695	588.304	635	9.457
2020_01_21	High Parasitism	NSRef-1	No Infection	s4w3	73.57	582.244	700	11.06
2020_01_21	High Parasitism	NSRef-1	No Infection	s4w3	51.23	611.252	708	8.448
2020_01_21	High Parasitism	NSRef-1	No Infection	s4w3	59.681	592.229	697	8.938
2020_01_21	High Parasitism	NSRef-1	No Infection	s4w3	68.918	629.516	746	9.489
2020_01_21	High Parasitism	NSRef-1	No Infection	s4w3	46.579	667.376	781	7.951
2020_01_21	High Parasitism	NSRef-1	No Infection	s4w3	67.084	1769.64	3023	9.751
2020_01_21	High Parasitism	NSRef-1	No Infection	s4w3	72.063	599.514	672	10.22
2020_01_21	High Parasitism	NSRef-1	No Infection	s4w3	37.8	595.941	658	6.937
2020_01_21	High Parasitism	NSRef-1	No Infection	s4w3	53.982	693.538	1206	9.215
2020_01_21	High Parasitism	NSRef-1	No Infection	s4w3	54.375	572.413	664	9.007
2020_01_21	High Parasitism	NSRef-1	No Infection	s4w3	43.565	648.159	770	7.448
2020_01_21	High Parasitism	NSRef-1	No Infection	s4w3	52.868	626.233	826	8.444
2020_01_21	High Parasitism	NSRef-1	No Infection	s4w3	51.885	599.389	711	9.199
2020_01_21	High Parasitism	NSRef-1	No Infection	s4w3	43.565	602.995	680	7.448
2020_01_21	High Parasitism	NSRef-1	No Infection	s4w3	47.692	601.103	707	8.434
2020_01_21	High Parasitism	NSRef-1	No Infection	s4w3	57.912	596.274	724	8.967
2020_01_21	High Parasitism	NSRef-1	No Infection	s4w3	46.382	621.831	713	8.222
2020_01_21	High Parasitism	NSRef-1	No Infection	s4w3	43.762	575.979	687	7.728
2020_01_21	High Parasitism	NSRef-1	No Infection	s4w3	40.028	593.606	691	7.399
2020_01_21	High Parasitism	NSRef-1	No Infection	s4w3	37.8	593.957	852	6.937
2020_01_21	High Parasitism	NSRef-1	No Infection	s4w3	35.049	574.344	635	6.948
2020_01_21	High Parasitism	NSRef-1	No Infection	s4w3	82.545	575.78	703	10.784
2020_01_21	High Parasitism	NSRef-1	No Infection	s4w3	57.912	611.342	918	8.967
2020_01_21	High Parasitism	NSRef-1	No Infection	s4w3	64.463	546.629	624	10.008
2020_01_21	High Parasitism	NSRef-1	No Infection	s4w3	64.725	522.951	582	10.741
2020_01_21	High Parasitism	NSRef-1	No Infection	s4w3	37.8	548.251	636	6.937
2020_01_21	High Parasitism	NSRef-1	No Infection	s4w3	35.049	554.961	622	6.948
2020_01_21	High Parasitism	NSRef-1	No Infection	s4w3	41.796	585.68	736	7.935
2020_01_21	High Parasitism	NSRef-1	No Infection	s4w3	40.093	526.776	634	7.663
2020_01_21	High Parasitism	NSRef-1	No Infection	s4w3	64.725	511.325	574	9.22
2020_01_21	High Parasitism	NSRef-1	No Infection	s4w3	47.561	551.694	676	7.928
2020_01_21	High Parasitism	NSRef-1	No Infection	s4w3	90.406	560.841	640	11.236
2020_01_21	High Parasitism	NSRef-1	No Infection	s4w3	42.452	553.606	623	8.16
2020_01_21	High Parasitism	NSRef-1	No Infection	s4w3	65.446	557.061	628	10.476
2020_01_21	High Parasitism	NSRef-1	No Infection	s4w3	66.756	545.976	626	10.016
2020_01_21	High Parasitism	NSRef-1	No Infection	s4w3	59.419	588.681	741	9.52
2020_01_21	High Parasitism	NSRef-1	No Infection	s4w3	64.463	569.003	632	10.008
2020_01_21	High Parasitism	NSRef-1	No Infection	s4w3	226.867	1497.84	2668	23.991
2020_01_21	High Parasitism	NSRef-1	No Infection	s4w3	61.45	552.493	1121	8.955
2020_01_21	High Parasitism	NSRef-1	No Infection	s4w3	31.708	1017.08	1344	7.168
2020_01_21	High Parasitism	NSRef-1	No Infection	s4w3	40.028	583.61	655	7.939
2020_01_21	High Parasitism	NSRef-1	No Infection	s4w3	40.028	571.601	670	7.939
2020_01_21	High Parasitism	NSRef-1	No Infection	s4w3	46.382	565.686	707	8.222
2020_01_21	High Parasitism	NSRef-1	No Infection	s4w3	67.018	586.197	805	9.491
2020_01_21	High Parasitism	NSRef-1	No Infection	s4w3	85.034	587.086	884	12.836
2020_01_21	High Parasitism	NSRef-1	No Infection	s4w3	51.885	598.66	650	9.199
2020_01_21	High Parasitism	NSRef-1	No Infection	s4w3	62.629	638.883	711	9.721
2020_01_21	High Parasitism	NSRef-1	No Infection	s4w3	36.555	663.74	759	6.991
2020_01_21	High Parasitism	NSRef-1	No Infection	s4w3	53.195	596.011	700	8.23
2020_01_21	High Parasitism	NSRef-1	No Infection	s4w3	75.338	554.121	637	10.994
2020_01_21	High Parasitism	NSRef-1	No Infection	s4w3	104.622	497.553	598	11.542
2020_01_21	High Parasitism	NSRef-1	No Infection	s4w3	32.035	535.18	621	6.387
2020_01_21	High Parasitism	NSRef-1	No Infection	s4w3	49.068	575.525	735	8.994
2020_01_21	High Parasitism	NSRef-1	No Infection	s4w3	52.278	605.93	724	9.945
2020_01_21	High Parasitism	NSRef-1	No Infection	s4w3	30.79	577.194	661	6.672
2020_01_21	High Parasitism	NSRef-1	No Infection	s4w3	46.906	590.556	678	7.728
2020_01_21	High Parasitism	NSRef-1	No Infection	s4w3	53.195	465.619	497	8.23
2020_01_21	High Parasitism	NSRef-1	No Infection	s4w3	38.521	518.493	590	7.955
2020_01_21	High Parasitism	NSRef-1	No Infection	s4w3	56.406	580.289	761	8.475
2020_01_21	High Parasitism	NSRef-1	No Infection	s4w3	38.783	576.848	698	7.164
2020_01_21	High Parasitism	NSRef-1	No Infection	s4w3	49.265	551.96	628	8.176
2020_01_21	High Parasitism	NSRef-1	No Infection	s4w3	36.424	537.621	647	7.208
2020_01_21	High Parasitism	NSRef-1	No Infection	s4w3	52.868	547.414	605	8.444
2020_01_21	High Parasitism	NSRef-1	No Infection	s4w3	37.735	532.688	577	7.154
2020_01_21	High Parasitism	NSRef-1	No Infection	s4w3	45.203	529.742	605	7.714
2020_01_21	High Parasitism	NSRef-1	No Infection	s4w3	50.837	505.701	547	9.715
2020_01_21	High Parasitism	NSRef-1	No Infection	s4w3	52.409	573.39	721	8.736
2020_01_21	High Parasitism	NSRef-1	No Infection	s4w3	40.355	500.409	678	7.168
2020_01_21	High Parasitism	NSRef-1	No Infection	s4w3	66.756	571.551	731	10.016
2020_01_21	High Parasitism	NSRef-1	No Infection	s4w3	37.735	553.312	643	7.154
2020_01_21	High Parasitism	NSRef-1	No Infection	s4w3	49.068	510.077	559	8.994
2020_01_21	High Parasitism	NSRef-1	No Infection	s4w3	45.203	545.783	594	7.714
2020_01_21	High Parasitism	NSRef-1	No Infection	s4w3	111.37	1326.09	2332	12.563
2020_01_21	High Parasitism	NSRef-1	No Infection	s4w3	35.376	545.681	816	6.711
2020_01_21	High Parasitism	NSRef-1	No Infection	s4w3	57.912	516.48	673	8.967
2020_01_21	High Parasitism	NSRef-1	No Infection	s4w3	51.099	523.95	577	8.175
2020_01_21	High Parasitism	NSRef-1	No Infection	s4w3	40.028	510.722	559	7.939
2020_01_21	High Parasitism	NSRef-1	No Infection	s4w3	29.546	526.315	577	6.4
2020_01_21	High Parasitism	NSRef-1	No Infection	s4w3	46.317	549.543	671	8.498
2020_01_21	High Parasitism	NSRef-1	No Infection	s4w3	48.479	514.309	559	9.246
2020_01_21	High Parasitism	NSRef-1	No Infection	s4w3	37.211	495.058	529	7.711
2020_01_21	High Parasitism	NSRef-1	No Infection	s4w3	41.796	559.27	640	7.935
2020_01_21	High Parasitism	NSRef-1	No Infection	s4w3	36.424	522.079	558	7.208
2020_01_21	High Parasitism	NSRef-1	No Infection	s4w3	43.565	525.635	571	7.448
2020_01_21	High Parasitism	NSRef-1	No Infection	s4w3	34.787	450.503	480	7.43
2020_01_21	High Parasitism	NSRef-1	No Infection	s4w3	62.891	486.174	620	9.246
2020_01_21	High Parasitism	NSRef-1	No Infection	s4w3	52.868	454.549	563	8.444
2020_01_21	High Parasitism	NSRef-1	No Infection	s4w3	41.927	455.517	490	7.456
2020_01_21	High Parasitism	NSRef-1	No Infection	s4w3	54.506	456.401	504	8.467
2020_01_21	High Parasitism	NSRef-1	No Infection	s4w3	47.561	479.928	532	7.928
2020_01_21	High Parasitism	NSRef-1	No Infection	s4w3	47.955	489.148	535	8.223
2020_01_21	High Parasitism	NSRef-1	No Infection	s4w3	52.475	494.126	543	10.419
2020_01_21	High Parasitism	NSRef-1	No Infection	s4w3	59.485	475.848	513	9.222
2020_01_21	High Parasitism	NSRef-1	No Infection	s4w3	42.452	485.784	543	8.16
2020_01_21	High Parasitism	NSRef-1	No Infection	s4w3	46.906	505.38	687	7.728
2020_01_21	High Parasitism	NSRef-1	No Infection	s4w3	59.485	519.13	565	10.516
2020_01_21	High Parasitism	NSRef-1	No Infection	s4w3	71.08	439.735	487	9.513
2020_01_21	High Parasitism	NSRef-1	No Infection	s4w3	57.912	444.149	504	8.967
2020_01_21	High Parasitism	NSRef-1	No Infection	s4w3	56.34	436.507	479	9.279
2020_01_21	High Parasitism	NSRef-1	No Infection	s4w3	65.119	431.237	491	9.517
2020_01_21	High Parasitism	NSRef-1	No Infection	s4w3	52.409	440.973	486	8.736
2020_01_21	High Parasitism	NSRef-1	No Infection	s4w3	30.79	437.249	472	6.672
2020_01_21	High Parasitism	NSRef-1	No Infection	s4w3	51.099	444.313	492	8.175
2020_01_21	High Parasitism	NSRef-1	No Infection	s4w3	45.203	446.697	483	7.714
2020_01_21	High Parasitism	NSRef-1	No Infection	s4w3	32.035	449.597	505	6.962
2020_01_21	High Parasitism	NSRef-1	No Infection	s4w3	98.529	887.291	1343	13.57
2020_01_21	High Parasitism	NSRef-1	No Infection	s4w3	52.868	478.316	523	8.444
2020_01_21	High Parasitism	NSRef-1	No Infection	s4w3	77.631	476.119	513	11
2020_01_21	High Parasitism	NSRef-1	No Infection	s4w3	52.409	467.466	519	8.736
2020_01_21	High Parasitism	NSRef-1	No Infection	s4w3	73.57	466.314	531	10.458
2020_01_21	High Parasitism	NSRef-1	No Infection	s4w3	61.581	413.802	487	10.19
2020_01_21	High Parasitism	NSRef-1	No Infection	s4w3	57.519	438.218	478	9.493
2020_01_21	High Parasitism	NSRef-1	No Infection	s4w3	59.485	446.855	558	9.222
2020_01_21	High Parasitism	NSRef-1	No Infection	s4w3	91.127	497.984	774	11.021
2020_01_21	High Parasitism	NSRef-1	No Infection	s4w3	97.481	458.14	530	11.258
2020_01_21	High Parasitism	NSRef-1	No Infection	s4w3	93.289	694.704	1333	11.295
2020_01_21	High Parasitism	NSRef-1	No Infection	s4w3	109.011	417.201	480	12.292
2020_01_21	High Parasitism	NSRef-1	No Infection	s4w3	60.533	437.324	492	9.45
2020_01_21	High Parasitism	NSRef-1	No Infection	s4w3	71.015	464.663	1013	10.983
2020_01_21	High Parasitism	NSRef-1	No Infection	s4w3	44.155	805.88	1174	8.431
2020_01_21	High Parasitism	NSRef-1	No Infection	s4w3	68.918	864.481	1242	9.489
2020_01_21	High Parasitism	NSRef-1	No Infection	s4w3	339.481	869.328	1547	26.366
2020_01_21	High Parasitism	NSRef-1	No Infection	s4w3	72.456	447.869	496	9.77
2020_01_21	High Parasitism	NSRef-1	No Infection	s4w3	54.375	461.39	497	8.736
2020_01_21	High Parasitism	NSRef-1	No Infection	s4w3	43.762	495.85	567	7.728
2020_01_21	High Parasitism	NSRef-1	No Infection	s4w3	38.783	477.814	518	7.164
2020_01_21	High Parasitism	NSRef-1	No Infection	s4w3	70.556	468.897	517	9.996
2020_01_21	High Parasitism	NSRef-1	No Infection	s4w3	62.891	512.507	573	9.246
2020_01_21	High Parasitism	NSRef-1	No Infection	s4w3	60.14	512.707	571	9.987
2020_01_21	High Parasitism	NSRef-1	No Infection	s4w3	56.143	510.799	560	8.967
2020_01_21	High Parasitism	NSRef-1	No Infection	s4w3	56.34	520.516	601	8.753
2020_01_21	High Parasitism	NSRef-1	No Infection	s4w3	60.533	528.464	788	9.45
2020_01_21	High Parasitism	NSRef-1	No Infection	s4w3	57.781	514.399	595	8.697
2020_01_21	High Parasitism	NSRef-1	No Infection	s4w3	44.548	583.071	698	8.226
2020_01_21	High Parasitism	NSRef-1	No Infection	s4w3	59.485	474.965	534	9.222
2020_01_21	High Parasitism	NSRef-1	No Infection	s4w3	92.371	479.935	562	11.777
2020_01_21	High Parasitism	NSRef-1	No Infection	s4w3	56.34	482.703	521	9.279
2020_01_21	High Parasitism	NSRef-1	No Infection	s4w3	56.406	496.533	550	8.475
2020_01_21	High Parasitism	NSRef-1	No Infection	s4w3	65.119	494.542	545	9.517
2020_01_21	High Parasitism	NSRef-1	No Infection	s4w3	61.908	524.356	595	9.94
2020_01_21	High Parasitism	NSRef-1	No Infection	s4w3	70.687	543.412	747	12.034
2020_01_21	High Parasitism	NSRef-1	No Infection	s4w3	47.561	492.302	537	7.928
2020_01_21	High Parasitism	NSRef-1	No Infection	s4w3	48.872	492.944	541	9.719
2020_01_21	High Parasitism	NSRef-1	No Infection	s4w3	59.681	521.795	583	8.938
2020_01_21	High Parasitism	NSRef-1	No Infection	s4w3	38.39	735.346	910	7.392
2020_01_21	High Parasitism	NSRef-1	No Infection	s4w3	58.633	590.426	772	10.03
2020_01_21	High Parasitism	NSRef-1	No Infection	s4w3	480.855	1204.17	2216	26.726
2020_01_21	High Parasitism	NSRef-1	No Infection	s4w3	46.906	462.605	543	7.728
2020_01_21	High Parasitism	NSRef-1	No Infection	s4w3	56.34	473.388	525	9.279
2020_01_21	High Parasitism	NSRef-1	No Infection	s4w3	49.265	542.836	683	8.176
2020_01_21	High Parasitism	NSRef-1	No Infection	s4w3	59.681	530.013	625	8.938
2020_01_21	High Parasitism	NSRef-1	No Infection	s4w3	43.303	546.66	632	7.934
2020_01_21	High Parasitism	NSRef-1	No Infection	s4w3	72.325	510.94	569	10.009
2020_01_21	High Parasitism	NSRef-2	No Infection	s5w2	99.512	742.521	997	12.33
2020_01_21	High Parasitism	NSRef-2	No Infection	s5w2	48.544	716.408	962	8.631
2020_01_21	High Parasitism	NSRef-2	No Infection	s5w2	589.867	2337.88	4095	33.181
2020_01_21	High Parasitism	NSRef-2	No Infection	s5w2	97.219	641.567	809	12.063
2020_01_21	High Parasitism	NSRef-2	No Infection	s5w2	73.57	696.824	932	10.458
2020_01_21	High Parasitism	NSRef-2	No Infection	s5w2	72.456	601.974	685	9.77
2020_01_21	High Parasitism	NSRef-2	No Infection	s5w2	54.375	604.295	674	8.736
2020_01_21	High Parasitism	NSRef-2	No Infection	s5w2	56.143	620.783	694	8.967
2020_01_21	High Parasitism	NSRef-2	No Infection	s5w2	40.355	611.756	661	7.168
2020_01_21	High Parasitism	NSRef-2	No Infection	s5w2	47.561	567.379	611	7.928
2020_01_21	High Parasitism	NSRef-2	No Infection	s5w2	46.906	570.803	638	7.728
2020_01_21	High Parasitism	NSRef-2	No Infection	s5w2	39.569	661.061	766	8.139
2020_01_21	High Parasitism	NSRef-2	No Infection	s5w2	51.099	593.929	661	8.175
2020_01_21	High Parasitism	NSRef-2	No Infection	s5w2	45.072	676.105	773	7.997
2020_01_21	High Parasitism	NSRef-2	No Infection	s5w2	201.514	1124.72	1994	17.9
2020_01_21	High Parasitism	NSRef-2	No Infection	s5w2	37.8	654.816	732	7.483
2020_01_21	High Parasitism	NSRef-2	No Infection	s5w2	51.099	659.454	789	8.175
2020_01_21	High Parasitism	NSRef-2	No Infection	s5w2	301.091	995.949	2805	25.086
2020_01_21	High Parasitism	NSRef-2	No Infection	s5w2	35.376	550.583	612	6.711
2020_01_21	High Parasitism	NSRef-2	No Infection	s5w2	59.681	545.441	599	8.938
2020_01_21	High Parasitism	NSRef-2	No Infection	s5w2	60.795	552.221	625	9.189
2020_01_21	High Parasitism	NSRef-2	No Infection	s5w2	116.48	497.308	566	12.575
2020_01_21	High Parasitism	NSRef-2	No Infection	s5w2	45.858	531.34	637	8.704
2020_01_21	High Parasitism	NSRef-2	No Infection	s5w2	52.868	625.471	735	8.444
2020_01_21	High Parasitism	NSRef-2	No Infection	s5w2	37.735	522.24	588	7.154
2020_01_21	High Parasitism	NSRef-2	No Infection	s5w2	86.017	570.677	674	11.514
2020_01_21	High Parasitism	NSRef-2	No Infection	s5w2	54.375	593.57	694	9.007
2020_01_21	High Parasitism	NSRef-2	No Infection	s5w2	57.912	565.886	616	9.227
2020_01_21	High Parasitism	NSRef-2	No Infection	s5w2	63.939	565.02	650	10.212
2020_01_21	High Parasitism	NSRef-2	No Infection	s5w2	46.579	642.772	721	7.951
2020_01_21	High Parasitism	NSRef-2	No Infection	s5w2	33.542	606.285	685	7.233
2020_01_21	High Parasitism	NSRef-2	No Infection	s5w2	56.143	574.126	618	8.967
2020_01_21	High Parasitism	NSRef-2	No Infection	s5w2	59.747	586.279	640	8.722
2020_01_21	High Parasitism	NSRef-2	No Infection	s5w2	103.836	501.568	560	12.02
2020_01_21	High Parasitism	NSRef-2	No Infection	s5w2	78.09	486.004	545	10.792
2020_01_21	High Parasitism	NSRef-2	No Infection	s5w2	64.463	603.801	718	10.008
2020_01_21	High Parasitism	NSRef-2	No Infection	s5w2	46.579	610.989	669	7.951
2020_01_21	High Parasitism	NSRef-2	No Infection	s5w2	54.375	568.233	615	9.007
2020_01_21	High Parasitism	NSRef-2	No Infection	s5w2	59.485	536.79	617	9.222
2020_01_21	High Parasitism	NSRef-2	No Infection	s5w2	70.556	536.405	637	9.996
2020_01_21	High Parasitism	NSRef-2	No Infection	s5w2	72.325	524.04	574	10.009
2020_01_21	High Parasitism	NSRef-2	No Infection	s5w2	69.049	542.459	589	11.824
2020_01_21	High Parasitism	NSRef-2	No Infection	s5w2	47.955	508.956	556	8.223
2020_01_21	High Parasitism	NSRef-2	No Infection	s5w2	51.099	571.805	654	8.175
2020_01_21	High Parasitism	NSRef-2	No Infection	s5w2	31.708	640.14	772	7.168
2020_01_21	High Parasitism	NSRef-2	No Infection	s5w2	62.695	509.245	573	9.457
2020_01_21	High Parasitism	NSRef-2	No Infection	s5w2	53.982	499.013	548	9.215
2020_01_21	High Parasitism	NSRef-2	No Infection	s5w2	54.375	489.447	550	9.007
2020_01_21	High Parasitism	NSRef-2	No Infection	s5w2	61.908	494.452	535	9.94
2020_01_21	High Parasitism	NSRef-2	No Infection	s5w2	65.446	498.43	555	10.476
2020_01_21	High Parasitism	NSRef-2	No Infection	s5w2	38.521	562.51	676	7.955
2020_01_21	High Parasitism	NSRef-2	No Infection	s5w2	40.355	537.584	577	7.168
2020_01_21	High Parasitism	NSRef-2	No Infection	s5w2	47.955	607.609	1054	8.223
2020_01_21	High Parasitism	NSRef-2	No Infection	s5w2	96.761	1026.45	1901	14.589
2020_01_21	High Parasitism	NSRef-2	No Infection	s5w2	49.33	630.851	719	8.437
2020_01_21	High Parasitism	NSRef-2	No Infection	s5w2	69.704	559.353	678	12.208
2020_01_21	High Parasitism	NSRef-2	No Infection	s5w2	69.77	517.443	577	10.088
2020_01_21	High Parasitism	NSRef-2	No Infection	s5w2	49.461	607.053	744	8.659
2020_01_21	High Parasitism	NSRef-2	No Infection	s5w2	52.213	662.371	797	9.839
2020_01_21	High Parasitism	NSRef-2	No Infection	s5w2	52.409	458.76	501	9.961
2020_01_21	High Parasitism	NSRef-2	No Infection	s5w2	222.543	1258.71	2306	18.97
2020_01_21	High Parasitism	NSRef-2	No Infection	s5w3	40.093	615.734	667	7.663
2020_01_21	High Parasitism	NSRef-2	No Infection	s5w3	30.79	596.17	640	6.672
2020_01_21	High Parasitism	NSRef-2	No Infection	s5w3	49.33	659.356	736	8.437
2020_01_21	High Parasitism	NSRef-2	No Infection	s5w3	52.082	638.785	711	8.943
2020_01_21	High Parasitism	NSRef-2	No Infection	s5w3	79.4	636.805	722	11.284
2020_01_21	High Parasitism	NSRef-2	No Infection	s5w3	51.296	614.266	669	9.481
2020_01_21	High Parasitism	NSRef-2	No Infection	s5w3	45.072	654.301	735	7.997
2020_01_21	High Parasitism	NSRef-2	No Infection	s5w3	380.754	1713.68	3836	22.506
2020_01_21	High Parasitism	NSRef-2	No Infection	s5w3	33.28	618.205	654	6.888
2020_01_21	High Parasitism	NSRef-2	No Infection	s5w3	59.419	666.083	725	9.52
2020_01_21	High Parasitism	NSRef-2	No Infection	s5w3	44.81	577.858	635	9.249
2020_01_21	High Parasitism	NSRef-2	No Infection	s5w3	67.018	702.175	812	9.491
2020_01_21	High Parasitism	NSRef-2	No Infection	s5w3	86.017	610.072	672	10.465
2020_01_21	High Parasitism	NSRef-2	No Infection	s5w3	38.39	584.647	654	7.392
2020_01_21	High Parasitism	NSRef-2	No Infection	s5w3	40.355	576.112	624	7.168
2020_01_21	High Parasitism	NSRef-2	No Infection	s5w3	46.906	538.099	592	7.728
2020_01_21	High Parasitism	NSRef-2	No Infection	s5w3	88.572	562.783	623	11.303
2020_01_21	High Parasitism	NSRef-2	No Infection	s5w3	52.868	640.274	738	8.444
2020_01_21	High Parasitism	NSRef-2	No Infection	s5w3	41.796	624.784	671	7.935
2020_01_21	High Parasitism	NSRef-2	No Infection	s5w3	38.39	672.125	762	7.392
2020_01_21	High Parasitism	NSRef-2	No Infection	s5w3	53.195	705.933	826	8.23
2020_01_21	High Parasitism	NSRef-2	No Infection	s5w3	52.082	689.702	771	8.943
2020_01_21	High Parasitism	NSRef-2	No Infection	s5w3	40.028	684.795	747	7.939
2020_01_21	High Parasitism	NSRef-2	No Infection	s5w3	47.561	773.956	1042	7.928
2020_01_21	High Parasitism	NSRef-2	No Infection	s5w3	47.561	745.85	859	7.928
2020_01_21	High Parasitism	NSRef-2	No Infection	s5w3	57.781	689.586	749	8.697
2020_01_21	High Parasitism	NSRef-2	No Infection	s5w3	72.456	696.231	774	9.77
2020_01_21	High Parasitism	NSRef-2	No Infection	s5w3	92.502	680.108	748	11.522
2020_01_21	High Parasitism	NSRef-2	No Infection	s5w3	41.796	686.1	741	7.935
2020_01_21	High Parasitism	NSRef-2	No Infection	s5w3	44.155	678.454	782	8.431
2020_01_21	High Parasitism	NSRef-2	No Infection	s5w3	56.34	723.593	809	8.753
2020_01_21	High Parasitism	NSRef-2	No Infection	s5w3	70.753	707.73	777	9.745
2020_01_21	High Parasitism	NSRef-2	No Infection	s5w3	82.741	609.39	676	10.539
2020_01_21	High Parasitism	NSRef-2	No Infection	s5w3	91.454	598.888	672	12.273
2020_01_21	High Parasitism	NSRef-2	No Infection	s5w3	84.772	632.288	707	10.801
2020_01_21	High Parasitism	NSRef-2	No Infection	s5w3	64.725	653.818	717	9.22
2020_01_21	High Parasitism	NSRef-2	No Infection	s5w3	78.614	708.835	1030	10.226
2020_01_21	High Parasitism	NSRef-2	No Infection	s5w3	70.228	744.562	812	10.258
2020_01_21	High Parasitism	NSRef-2	No Infection	s5w3	111.501	790.149	920	12.059
2020_01_21	High Parasitism	NSRef-2	No Infection	s5w3	61.646	674.078	753	10.519
2020_01_21	High Parasitism	NSRef-2	No Infection	s5w3	47.692	644.065	700	8.434
2020_01_21	High Parasitism	NSRef-2	No Infection	s5w3	50.051	526.469	566	8.928
2020_01_21	High Parasitism	NSRef-2	No Infection	s5w3	54.506	579.374	657	8.467
2020_01_21	High Parasitism	NSRef-2	No Infection	s5w3	65.446	585.152	636	10.476
2020_01_21	High Parasitism	NSRef-2	No Infection	s5w3	118.38	619.028	697	12.546
2020_01_21	High Parasitism	NSRef-2	No Infection	s5w3	49.068	512.23	565	7.904
2020_01_21	High Parasitism	NSRef-2	No Infection	s5w3	78.614	549.512	609	10.226
2020_01_21	High Parasitism	NSRef-2	No Infection	s5w3	37.8	571.766	619	6.937
2020_01_21	High Parasitism	NSRef-2	No Infection	s5w3	45.072	663.718	1023	7.997
2020_01_21	High Parasitism	NSRef-2	No Infection	s5w3	106.522	653.993	803	11.755
2020_01_21	High Parasitism	NSRef-2	No Infection	s5w3	118.183	580.541	668	12.811
2020_01_21	High Parasitism	NSRef-2	No Infection	s5w3	32.035	671.708	762	6.387
2020_01_21	High Parasitism	NSRef-2	No Infection	s5w3	31.97	686.65	750	7.932
2020_01_21	High Parasitism	NSRef-2	No Infection	s5w3	42.517	703.444	813	8.491
2020_01_21	High Parasitism	NSRef-2	No Infection	s5w3	51.099	688.596	771	8.175
2020_01_21	High Parasitism	NSRef-2	No Infection	s5w3	97.219	665.089	783	12.063
2020_01_21	High Parasitism	NSRef-2	No Infection	s5w3	76.518	704.973	785	10.258
2020_01_21	High Parasitism	NSRef-2	No Infection	s5w3	67.018	704.474	785	9.491
2020_01_21	High Parasitism	NSRef-2	No Infection	s5w3	64.857	608.798	666	9.729
2020_01_21	High Parasitism	NSRef-2	No Infection	s5w3	41.796	672.113	747	7.67
2020_01_21	High Parasitism	NSRef-2	No Infection	s5w3	43.762	647.543	718	7.728
2020_01_21	High Parasitism	NSRef-2	No Infection	s5w3	67.084	640.479	712	9.751
2020_01_21	High Parasitism	NSRef-2	No Infection	s5w3	82.021	732.29	838	11.311
2020_01_21	High Parasitism	NSRef-2	No Infection	s5w3	49.265	678.094	747	8.176
2020_01_21	High Parasitism	NSRef-2	No Infection	s5w3	59.681	640.576	698	8.938
2020_01_21	High Parasitism	NSRef-2	No Infection	s5w3	136.788	585.174	655	14.803
2020_01_21	High Parasitism	NSRef-2	No Infection	s5w3	92.371	563.011	626	12.063
2020_01_21	High Parasitism	NSRef-2	No Infection	s5w3	45.072	595.247	665	7.997
2020_01_21	High Parasitism	NSRef-2	No Infection	s5w3	68.787	599.69	652	9.704
2020_01_21	High Parasitism	NSRef-2	No Infection	s5w3	64.725	705.102	844	9.22
2020_01_21	High Parasitism	NSRef-2	No Infection	s5w3	56.995	650.578	706	9.764
2020_01_21	High Parasitism	NSRef-2	No Infection	s5w3	76.125	758.062	909	9.954
2020_01_21	High Parasitism	NSRef-2	No Infection	s5w3	43.565	620.185	671	7.448
2020_01_21	High Parasitism	NSRef-2	No Infection	s5w3	49.265	668.112	776	8.176
2020_01_21	High Parasitism	NSRef-2	No Infection	s5w3	45.072	770.109	859	7.997
2020_01_21	High Parasitism	NSRef-2	No Infection	s5w3	74.29	719.302	814	11.847
2020_01_21	High Parasitism	NSRef-2	No Infection	s5w3	70.556	691.554	747	9.996
2020_01_21	High Parasitism	NSRef-2	No Infection	s5w3	62.695	714.055	842	9.457
2020_01_21	High Parasitism	NSRef-2	No Infection	s5w3	46.906	789.142	873	7.728
2020_01_21	High Parasitism	NSRef-2	No Infection	s5w3	30.79	683.328	743	6.672
2020_01_21	High Parasitism	NSRef-2	No Infection	s5w3	36.162	666.946	731	7.42
2020_01_21	High Parasitism	NSRef-2	No Infection	s5w3	32.035	644.712	695	6.387
2020_01_21	High Parasitism	NSRef-2	No Infection	s5w3	54.506	640.28	698	8.467
2020_01_21	High Parasitism	NSRef-2	No Infection	s5w3	38.783	625.89	682	7.164
2020_01_21	High Parasitism	NSRef-2	No Infection	s5w3	70.228	668.017	723	10.258
2020_01_21	High Parasitism	NSRef-2	No Infection	s5w3	80.317	629.002	684	10.773
2020_01_21	High Parasitism	NSRef-2	No Infection	s5w3	33.542	605.379	644	7.233
2020_01_21	High Parasitism	NSRef-2	No Infection	s5w3	46.382	601.462	638	8.222
2020_01_21	High Parasitism	NSRef-2	No Infection	s5w3	33.673	648.053	711	6.658
2020_01_21	High Parasitism	NSRef-2	No Infection	s5w3	45.858	672.569	714	8.704
2020_01_21	High Parasitism	NSRef-2	No Infection	s5w3	36.424	773.252	879	7.208
2020_01_21	High Parasitism	NSRef-2	No Infection	s5w3	47.823	714.26	762	8.751
2020_01_21	High Parasitism	NSRef-2	No Infection	s5w3	42.452	720.867	786	8.16
2020_01_21	High Parasitism	NSRef-2	No Infection	s5w3	49.789	714.2	780	9.193
2020_01_21	High Parasitism	NSRef-2	No Infection	s5w3	51.885	694.875	744	9.199
2020_01_21	High Parasitism	NSRef-2	No Infection	s5w3	63.939	711.803	1102	10.212
2020_01_21	High Parasitism	NSRef-2	No Infection	s5w3	50.051	678.746	734	8.928
2020_01_21	High Parasitism	NSRef-2	No Infection	s5w3	40.028	635.655	716	7.399
2020_01_21	High Parasitism	NSRef-2	No Infection	s5w3	45.203	629.535	716	7.714
2020_01_21	High Parasitism	NSRef-2	No Infection	s5w3	62.695	686.249	750	9.457
2020_01_21	High Parasitism	NSRef-2	No Infection	s5w3	52.278	653.515	709	9.945
2020_01_21	High Parasitism	NSRef-2	No Infection	s5w3	54.506	674.081	723	8.467
2020_01_21	High Parasitism	NSRef-2	No Infection	s5w3	38.39	728.386	808	7.392
2020_01_21	High Parasitism	NSRef-2	No Infection	s5w3	32.035	655.736	691	6.387
2020_01_21	High Parasitism	NSRef-2	No Infection	s5w3	45.203	679.31	770	7.714
2020_01_21	High Parasitism	NSRef-2	No Infection	s5w3	106.653	646.799	702	12.09
2020_01_21	High Parasitism	NSRef-2	No Infection	s5w3	62.498	660.555	786	11.213
2020_01_21	High Parasitism	NSRef-2	No Infection	s5w3	80.317	613.061	665	10.773
2020_01_21	High Parasitism	NSRef-2	No Infection	s5w3	43.762	685.181	775	7.728
2020_01_21	High Parasitism	NSRef-2	No Infection	s5w3	56.143	589.281	633	8.967
2020_01_21	High Parasitism	NSRef-2	No Infection	s5w3	40.093	593.966	658	7.663
2020_01_21	High Parasitism	NSRef-2	No Infection	s5w3	47.823	566.441	610	8.751
2020_01_21	High Parasitism	NSRef-2	No Infection	s5w3	125.258	582.994	654	15.071
2020_01_21	High Parasitism	NSRef-2	No Infection	s5w3	118.904	722.134	803	14.777
2020_01_21	High Parasitism	NSRef-2	Infection	s5w10	41.927	574.987	663	7.456
2020_01_21	High Parasitism	NSRef-2	Infection	s5w10	49.33	622.795	876	8.437
2020_01_21	High Parasitism	NSRef-2	Infection	s5w10	59.681	650.082	750	8.938
2020_01_21	High Parasitism	NSRef-2	Infection	s5w10	56.406	742.233	1057	8.475
2020_01_21	High Parasitism	NSRef-2	Infection	s5w10	65.774	695.287	1052	11.26
2020_01_21	High Parasitism	NSRef-2	Infection	s5w10	170.461	790.062	1189	14.881
2020_01_21	High Parasitism	NSRef-2	Infection	s5w10	52.868	636.289	682	8.444
2020_01_21	High Parasitism	NSRef-2	Infection	s5w10	44.155	618.366	659	8.762
2020_01_21	High Parasitism	NSRef-2	Infection	s5w10	293.23	758.252	1190	22.79
2020_01_21	High Parasitism	NSRef-2	Infection	s5w10	1463.86	825.68	2843	44.694
2020_01_21	High Parasitism	NSRef-2	Infection	s5w10	269.515	863.862	1418	26.254
2020_01_21	High Parasitism	NSRef-2	Infection	s5w10	82.741	618.447	672	10.539
2020_01_21	High Parasitism	NSRef-2	Infection	s5w10	106.522	646.052	716	11.755
2020_01_21	High Parasitism	NSRef-2	Infection	s5w10	296.571	692.576	932	20.199
2020_01_21	High Parasitism	NSRef-2	Infection	s5w10	129.123	664.227	780	13.063
2020_01_21	High Parasitism	NSRef-2	Infection	s5w10	167.906	573.071	821	19.991
2020_01_21	High Parasitism	NSRef-2	Infection	s5w10	69.77	566.758	664	11.068
2020_01_21	High Parasitism	NSRef-2	Infection	s5w10	58.436	584.869	665	10.11
2020_01_21	High Parasitism	NSRef-2	Infection	s5w10	63.35	590.154	641	10.542
2020_01_21	High Parasitism	NSRef-2	Infection	s5w10	138.819	515.643	1040	17.271
2020_01_21	High Parasitism	NSRef-2	Infection	s5w10	84.51	521.832	676	11.97
2020_01_21	High Parasitism	NSRef-2	Infection	s5w10	674.901	677.85	1450	30.495
2020_01_21	High Parasitism	NSRef-2	Infection	s5w10	79.793	515.016	619	11.094
2020_01_21	High Parasitism	NSRef-2	Infection	s5w10	49.068	498.567	631	11.641
2020_01_21	High Parasitism	NSRef-2	Infection	s5w10	226.932	504.238	640	18.792
2020_01_21	High Parasitism	NSRef-2	Infection	s5w10	128.206	512.758	565	13.779
2020_01_21	High Parasitism	NSRef-2	Infection	s5w10	574.865	674.2	1257	29.436
2020_01_21	High Parasitism	NSRef-2	Infection	s5w10	45.072	613.558	681	7.997
2020_01_21	High Parasitism	NSRef-2	Infection	s5w10	36.162	613.46	774	7.42
2020_01_21	High Parasitism	NSRef-2	Infection	s5w10	184.743	620.684	765	17.664
2020_01_21	High Parasitism	NSRef-2	Infection	s5w10	43.762	547.823	615	7.728
2020_01_21	High Parasitism	NSRef-2	Infection	s5w10	76.256	538.066	615	10.522
2020_01_21	High Parasitism	NSRef-2	Infection	s5w10	45.072	634.977	951	7.997
2020_01_21	High Parasitism	NSRef-2	Infection	s5w10	41.403	673.935	989	8.228
2020_01_21	High Parasitism	NSRef-2	Infection	s5w10	50.051	610.433	708	10.316
2020_01_21	High Parasitism	NSRef-2	Infection	s5w10	109.011	609.624	887	11.781
2020_01_21	High Parasitism	NSRef-2	Infection	s5w10	101.936	618.522	767	11.528
2020_01_21	High Parasitism	NSRef-2	Infection	s5w10	47.561	570.18	638	7.928
2020_01_21	High Parasitism	NSRef-2	Infection	s5w10	70.818	658.255	940	13.978
2020_01_21	High Parasitism	NSRef-2	Infection	s5w10	294.802	827.25	1392	21.321
2020_01_21	High Parasitism	NSRef-2	Infection	s5w10	72.325	558.828	673	10.009
2020_01_21	High Parasitism	NSRef-2	Infection	s5w10	41.927	497.334	542	7.456
2020_01_21	High Parasitism	NSRef-2	Infection	s5w10	96.957	574.47	675	13.062
2020_01_21	High Parasitism	NSRef-2	Infection	s5w10	76.387	561.576	629	13.134
2020_01_21	High Parasitism	NSRef-2	Infection	s5w10	92.306	616.543	695	12.309
2020_01_21	High Parasitism	NSRef-2	Infection	s5w10	36.031	658.102	1095	7.826
2020_01_21	High Parasitism	NSRef-2	Infection	s5w10	34.983	645.983	861	7.847
2020_01_21	High Parasitism	NSRef-2	Infection	s5w10	35.769	661.097	738	7.638
2020_01_21	High Parasitism	NSRef-2	Infection	s5w10	32.232	619.72	658	6.657
2020_01_21	High Parasitism	NSRef-2	Infection	s5w10	32.035	632.984	707	6.962
2020_01_21	High Parasitism	NSRef-2	Infection	s5w10	28.432	628.097	685	6.416
2020_01_21	High Parasitism	NSRef-2	Infection	s5w10	37.211	643.903	700	7.711
2020_01_21	High Parasitism	NSRef-2	Infection	s5w10	30.07	659.318	716	8.093
2020_01_21	High Parasitism	NSRef-2	Infection	s5w10	26.663	657.929	713	6.131
2020_01_21	High Parasitism	NSRef-2	Infection	s5w10	34.394	642.735	706	7.093
2020_01_21	High Parasitism	NSRef-2	Infection	s5w10	35.049	589.172	660	6.948
2020_01_21	High Parasitism	NSRef-2	Infection	s5w10	45.203	641.613	1104	7.714
2020_01_21	High Parasitism	NSRef-2	Infection	s5w10	46.906	604.633	897	7.728
2020_01_21	High Parasitism	NSRef-2	Infection	s5w10	92.502	586.198	784	11.522
2020_01_21	High Parasitism	NSRef-2	Infection	s5w10	36.555	569.636	618	6.991
2020_01_21	High Parasitism	NSRef-2	Infection	s5w10	32.232	572.033	619	6.657
2020_01_21	High Parasitism	NSRef-2	Infection	s5w10	38.39	577.341	624	7.392
2020_01_21	High Parasitism	NSRef-2	Infection	s5w10	59.485	566.502	657	10.516
2020_01_21	High Parasitism	NSRef-2	Infection	s5w10	97.481	666.579	753	11.258
2020_01_21	High Parasitism	NSRef-2	Infection	s5w10	157.49	861.469	1194	15.087
2020_01_21	High Parasitism	NSRef-2	Infection	s5w10	93.158	594.603	650	11.051
2020_01_21	High Parasitism	NSRef-2	Infection	s5w10	109.011	568.116	717	12.292
2020_01_21	High Parasitism	NSRef-2	Infection	s5w10	61.45	545.651	847	8.955
2020_01_21	High Parasitism	NSRef-2	Infection	s5w10	47.692	520.663	565	8.434
2020_01_21	High Parasitism	NSRef-2	Infection	s5w10	58.633	518.244	577	10.03
2020_01_21	High Parasitism	NSRef-2	Infection	s5w10	41.796	535.274	607	7.935
2020_01_21	High Parasitism	NSRef-2	Infection	s5w10	716.173	877.968	1654	31.241
2020_01_21	High Parasitism	NSRef-2	Infection	s5w10	36.555	619.398	674	6.991
2020_01_21	High Parasitism	NSRef-2	Infection	s5w10	175.899	634.566	798	17.144
2020_01_21	High Parasitism	NSRef-2	Infection	s5w10	725.148	914.115	1407	35.945
2020_01_21	High Parasitism	NSRef-2	Infection	s5w10	1051.72	771.429	1174	40.712
2020_01_21	High Parasitism	NSRef-2	Infection	s5w10	620.657	997.139	2007	35.607
2020_01_21	High Parasitism	NSRef-2	Infection	s5w10	647.582	922.013	1194	33.564
2020_01_21	High Parasitism	NSRef-2	Infection	s5w10	519.835	727.401	1387	29.072
2020_01_21	High Parasitism	NSRef-2	Infection	s5w10	92.044	620.935	738	11.506
2020_01_21	High Parasitism	NSRef-2	Infection	s5w10	222.412	670.355	1032	18.296
2020_01_21	High Parasitism	NSRef-2	Infection	s5w10	212.978	619.395	1013	18.785
2020_01_21	High Parasitism	NSRef-2	Infection	s5w10	50.64	687.96	775	8.275
2020_01_21	High Parasitism	NSRef-2	Infection	s5w10	43.041	580.539	625	7.874
2020_01_21	High Parasitism	NSRef-2	Infection	s5w10	82.676	576.003	682	11.498
2020_01_21	High Parasitism	NSRef-2	Infection	s5w10	24.894	573.426	621	6.169
2020_01_21	High Parasitism	NSRef-2	Infection	s5w10	34.852	555.485	596	7.161
2020_01_21	High Parasitism	NSRef-2	Infection	s5w10	34.328	587.328	644	7.731
2020_01_21	High Parasitism	NSRef-2	Infection	s5w10	263.684	877.627	1859	24.342
2020_01_21	High Parasitism	NSRef-3	Infection	s6w11	111.501	661.397	993	12.059
2020_01_21	High Parasitism	NSRef-3	Infection	s6w11	1308.66	673.331	1033	41.991
2020_01_21	High Parasitism	NSRef-3	Infection	s6w11	56.34	598.529	786	8.753
2020_01_21	High Parasitism	NSRef-3	Infection	s6w11	51.099	593.103	650	8.175
2020_01_21	High Parasitism	NSRef-3	Infection	s6w11	47.692	567.599	607	8.434
2020_01_21	High Parasitism	NSRef-3	Infection	s6w11	104.295	649.878	1008	14.345
2020_01_21	High Parasitism	NSRef-3	Infection	s6w11	309.084	651.665	913	19.963
2020_01_21	High Parasitism	NSRef-3	Infection	s6w11	128.927	627.297	698	13.327
2020_01_21	High Parasitism	NSRef-3	Infection	s6w11	57.912	644.942	701	8.967
2020_01_21	High Parasitism	NSRef-3	Infection	s6w11	91.127	608.776	671	11.021
2020_01_21	High Parasitism	NSRef-3	Infection	s6w11	88.703	629.285	1173	10.736
2020_01_21	High Parasitism	NSRef-3	Infection	s6w11	121.197	595.512	694	13.082
2020_01_21	High Parasitism	NSRef-3	Infection	s6w11	2675.3	708.211	1352	67.064
2020_01_21	High Parasitism	NSRef-3	Infection	s6w11	1226.51	718.331	1296	44.977
2020_01_21	High Parasitism	NSRef-3	Infection	s6w11	2145.05	762.413	1132	59.687
2020_01_21	High Parasitism	NSRef-3	Infection	s6w11	234.532	638.559	767	17.389
2020_01_21	High Parasitism	NSRef-3	Infection	s6w11	107.963	604.491	647	12.796
2020_01_21	High Parasitism	NSRef-3	Infection	s6w11	92.502	588.854	665	11.522
2020_01_21	High Parasitism	NSRef-3	Infection	s6w11	70.228	601.12	832	10.258
2020_01_21	High Parasitism	NSRef-3	Infection	s6w11	49.265	652.271	709	8.176
2020_01_21	High Parasitism	NSRef-3	Infection	s6w11	254.185	688.671	845	20.862
2020_01_21	High Parasitism	NSRef-3	Infection	s6w11	141.636	650.506	776	15.921
2020_01_21	High Parasitism	NSRef-3	Infection	s6w11	287.268	775.152	961	21.771
2020_01_21	High Parasitism	NSRef-3	Infection	s6w11	49.658	607.095	774	8.826
2020_01_21	High Parasitism	NSRef-3	Infection	s6w11	53.785	621.056	704	8.559
2020_01_21	High Parasitism	NSRef-3	Infection	s6w11	66.953	608.849	671	9.452
2020_01_21	High Parasitism	NSRef-3	Infection	s6w11	1245.31	665.906	1075	47.551
2020_01_21	High Parasitism	NSRef-3	Infection	s6w11	72.456	605.663	1018	9.77
2020_01_21	High Parasitism	NSRef-3	Infection	s6w11	30.79	607.089	680	6.672
2020_01_21	High Parasitism	NSRef-3	Infection	s6w11	40.028	564.956	602	7.939
2020_01_21	High Parasitism	NSRef-3	Infection	s6w11	42.517	596.587	638	8.491
2020_01_21	High Parasitism	NSRef-3	Infection	s6w11	3382.63	609.456	1046	67.316
2020_01_21	High Parasitism	NSRef-3	Infection	s6w11	434.932	785.001	2743	32.229
2020_01_21	High Parasitism	NSRef-3	Infection	s6w11	535.623	765.138	1024	44.393
2020_01_21	High Parasitism	NSRef-3	Infection	s6w11	134.299	560.072	738	16.166
2020_01_21	High Parasitism	NSRef-3	Infection	s6w11	223.526	511.089	605	17.382
2020_01_21	High Parasitism	NSRef-3	Infection	s6w11	185.463	602.347	738	16.179
2020_01_21	High Parasitism	NSRef-3	Infection	s6w11	101.281	725.01	1050	11.977
2020_01_21	High Parasitism	NSRef-3	Infection	s6w11	1396.12	643.934	2110	42.729
2020_01_21	High Parasitism	NSRef-3	Infection	s6w11	717.811	694.549	1074	33.196
2020_01_21	High Parasitism	NSRef-3	Infection	s6w11	56.34	587.083	757	9.279
2020_01_21	High Parasitism	NSRef-3	Infection	s6w11	91.127	597.833	679	11.021
2020_01_21	High Parasitism	NSRef-3	Infection	s6w11	80.317	669.413	839	10.512
2020_01_21	High Parasitism	NSRef-3	Infection	s6w11	67.018	640.182	728	9.491
2020_01_21	High Parasitism	NSRef-3	Infection	s6w11	169.479	629.514	739	17.19
2020_01_21	High Parasitism	NSRef-3	Infection	s6w11	45.203	622.419	690	7.714
2020_01_21	High Parasitism	NSRef-3	Infection	s6w11	84.248	611.201	656	11.027
2020_01_21	High Parasitism	NSRef-3	Infection	s6w11	1015.89	636.81	936	42.892
2020_01_21	High Parasitism	NSRef-3	Infection	s6w11	1193.29	656.045	1066	42.936
2020_01_21	High Parasitism	NSRef-3	Infection	s6w11	109.011	643.539	820	11.781
2020_01_21	High Parasitism	NSRef-3	Infection	s6w11	59.747	633.969	700	8.722
2020_01_21	High Parasitism	NSRef-3	Infection	s6w11	73.57	609.473	676	10.458
2020_01_21	High Parasitism	NSRef-3	Infection	s6w11	45.072	559.541	605	7.997
2020_01_21	High Parasitism	NSRef-3	Infection	s6w11	59.747	568.279	628	8.722
2020_01_21	High Parasitism	NSRef-3	Infection	s6w11	69.442	526.088	599	12.297
2020_01_21	High Parasitism	NSRef-3	Infection	s6w11	56.143	586.719	645	8.967
2020_01_21	High Parasitism	NSRef-3	Infection	s6w11	54.506	595.936	704	8.467
2020_01_21	High Parasitism	NSRef-3	Infection	s6w11	54.506	595.907	718	8.467
2020_01_21	High Parasitism	NSRef-3	Infection	s6w11	115.825	586.529	891	13.359
2020_01_21	High Parasitism	NSRef-3	Infection	s6w11	90.734	685.914	798	13.598
2020_01_21	High Parasitism	NSRef-3	Infection	s6w11	49.068	613.3	668	8.994
2020_01_21	High Parasitism	NSRef-3	Infection	s6w11	47.037	635.283	801	8.971
2020_01_21	High Parasitism	NSRef-3	Infection	s6w11	84.248	659.946	883	11.027
2020_01_21	High Parasitism	NSRef-3	Infection	s6w11	45.072	631.9	747	7.997
2020_01_21	High Parasitism	NSRef-3	Infection	s6w11	42.452	702.025	852	8.16
2020_01_21	High Parasitism	NSRef-3	Infection	s6w11	72.325	705.809	858	10.009
2020_01_21	High Parasitism	NSRef-3	Infection	s6w11	1127.45	588.082	857	41.554
2020_01_21	High Parasitism	NSRef-3	Infection	s6w11	106.391	712.797	939	12.303
2020_01_21	High Parasitism	NSRef-3	Infection	s6w11	46.317	604.003	681	8.498
2020_01_21	High Parasitism	NSRef-3	Infection	s6w11	37.735	602.429	638	7.154
2020_01_21	High Parasitism	NSRef-3	Infection	s6w11	35.376	603.03	646	6.711
2020_01_21	High Parasitism	NSRef-3	Infection	s6w11	1519.93	663.08	1344	49.42
2020_01_21	High Parasitism	NSRef-3	Infection	s6w11	130.237	591.351	659	14.37
2020_01_21	High Parasitism	NSRef-3	Infection	s6w11	62.629	545.945	724	9.721
2020_01_21	High Parasitism	NSRef-3	Infection	s6w11	1680.24	579.426	770	52.224
2020_01_21	High Parasitism	NSRef-3	Infection	s6w11	96.63	563.978	872	13.348
2020_01_21	High Parasitism	NSRef-3	Infection	s6w11	852.175	576.573	811	39.376
2020_01_21	High Parasitism	NSRef-3	Infection	s6w11	44.548	598.746	652	8.226
2020_01_30	No Parasitism	C1	No Infection	s1w4	37.735	513.464	602	7.154
2020_01_30	No Parasitism	C1	No Infection	s1w4	49.265	666.301	807	8.176
2020_01_30	No Parasitism	C1	No Infection	s1w4	73.57	501.328	593	10.458
2020_01_30	No Parasitism	C1	No Infection	s1w4	118.183	538.376	727	12.811
2020_01_30	No Parasitism	C1	No Infection	s1w4	37.997	588.426	695	8.155
2020_01_30	No Parasitism	C1	No Infection	s1w4	68.787	489.248	619	9.704
2020_01_30	No Parasitism	C1	No Infection	s1w4	44.155	540.318	691	8.431
2020_01_30	No Parasitism	C1	No Infection	s1w4	68.918	553.689	711	9.489
2020_01_30	No Parasitism	C1	No Infection	s1w4	56.34	592.262	772	8.753
2020_01_30	No Parasitism	C1	No Infection	s1w4	47.692	512.837	629	8.434
2020_01_30	No Parasitism	C1	No Infection	s1w4	123.489	768.099	1079	13.045
2020_01_30	No Parasitism	C1	No Infection	s1w4	51.23	573.063	719	8.448
2020_01_30	No Parasitism	C1	No Infection	s1w4	64.725	477.857	590	10.741
2020_01_30	No Parasitism	C1	No Infection	s1w4	53.195	507.693	597	8.23
2020_01_30	No Parasitism	C1	No Infection	s1w4	45.203	642.407	798	7.714
2020_01_30	No Parasitism	C1	No Infection	s1w4	68.525	536.182	688	10.476
2020_01_30	No Parasitism	C1	No Infection	s1w4	54.375	691.686	840	8.736
2020_01_30	No Parasitism	C1	No Infection	s1w4	46.906	509.887	618	7.728
2020_01_30	No Parasitism	C1	No Infection	s1w4	38.521	512.548	596	7.955
2020_01_30	No Parasitism	C1	No Infection	s1w4	27.515	589.895	667	6.144
2020_01_30	No Parasitism	C1	No Infection	s1w4	71.08	518.562	647	9.513
2020_01_30	No Parasitism	C1	No Infection	s1w4	29.611	416.208	467	6.642
2020_01_30	No Parasitism	C1	No Infection	s1w4	32.166	563.352	724	7.772
2020_01_30	No Parasitism	C1	No Infection	s1w4	26.205	588.778	717	6.146
2020_01_30	No Parasitism	C1	No Infection	s1w4	46.579	569.26	673	7.951
2020_01_30	No Parasitism	C1	No Infection	s1w4	30.79	541.566	641	6.672
2020_01_30	No Parasitism	C1	No Infection	s1w4	111.37	843.018	1251	12.563
2020_01_30	No Parasitism	C1	No Infection	s1w4	35.376	725.689	877	6.711
2020_01_30	No Parasitism	C1	No Infection	s1w4	29.349	706.112	871	6.113
2020_01_30	No Parasitism	C1	No Infection	s1w4	29.546	841.851	1039	6.4
2020_01_30	No Parasitism	C1	No Infection	s1w4	76.125	580.019	697	9.954
2020_01_30	No Parasitism	C1	No Infection	s1w4	33.542	663.117	790	7.233
2020_01_30	No Parasitism	C1	No Infection	s1w4	40.355	671.047	789	7.168
2020_01_30	No Parasitism	C1	No Infection	s1w4	45.072	614.089	762	7.997
2020_01_30	No Parasitism	C1	No Infection	s1w4	109.404	537.397	640	14.27
2020_01_30	No Parasitism	C1	No Infection	s1w4	54.833	554.957	655	11.83
2020_01_30	No Parasitism	C1	No Infection	s1w4	49.068	662.896	808	7.904
2020_01_30	No Parasitism	C1	No Infection	s1w4	57.912	495.38	569	8.967
2020_01_30	No Parasitism	C1	No Infection	s1w4	54.506	596.108	722	8.467
2020_01_30	No Parasitism	C1	No Infection	s1w4	68.918	820.232	1015	9.489
2020_01_30	No Parasitism	C1	No Infection	s1w4	120.934	940.269	1465	12.802
2020_01_30	No Parasitism	C1	No Infection	s1w4	45.203	637.906	779	7.714
2020_01_30	No Parasitism	C1	No Infection	s1w4	37.8	627.206	755	6.937
2020_01_30	No Parasitism	C1	No Infection	s1w4	67.018	671.654	930	9.491
2020_01_30	No Parasitism	C1	No Infection	s1w4	36.424	523.049	615	7.208
2020_01_30	No Parasitism	C1	No Infection	s1w4	49.068	529.628	643	7.904
2020_01_30	No Parasitism	C1	No Infection	s1w4	37.8	541.397	625	6.937
2020_01_30	No Parasitism	C1	No Infection	s1w4	36.162	610.353	730	7.42
2020_01_30	No Parasitism	C1	No Infection	s1w4	25.877	481.575	624	8.165
[truncated: 2,454 more rows]

## Sheet: Figure 5C - R script
###To run script: Delete first two rows of raw data sets( intensity calibration, size calibration and raw data), save them as .csv format and run script on R
library(ggplot2)
library(plyr)
library(reshape2)
setwd(dirname(rstudioapi::getActiveDocumentContext()$path))
list.files()
#Image intensity calibration
data_intensity_calibration = read.table('Figure 5C - IntensityCalibrati.csv', sep = ",", dec = ".", header = TRUE, check.names = F)
data_intensity_calibration = data_intensity_calibration[data_intensity_calibration$Area>1,]
head(data_intensity_calibration)
##Plot Cell area vs intensity in sample with no primary antibody
CorrCellMaxIntCellMajor = ggplot(data_intensity_calibration, aes(x=log2(Area), y=log2(Max)))+
geom_point()+
geom_smooth(method='lm', formula= y~x)
CorrCellMaxIntCellMajor
#Image cell size calibration
data_size_calibration = read.table(Figure 5C - SizeCalibration.csv', sep = ",", dec = ".", header = TRUE, check.names = F)
data_size_calibration = data_size_calibration[data_size_calibration$Area>1,]
head(data_size_calibration)
#Data
data=read.table('Figure 5C _Raw Data.csv', sep = ",", dec = ".", header = TRUE, check.names = F)
#Reorder factors
data$Treatment = factor(data$Treatment, levels=c('No Infection', 'Infection'))
data$Selection_Regime = factor(data$Selection_Regime, levels=c('No Parasitism', 'High Parasitism'))
###Plot FlowCytometry like
data_intensity_calibration = data_intensity_calibration[order(data_intensity_calibration$Max),]
MaxInt_Treshold = log2(data_intensity_calibration[round(length(data_intensity_calibration$Max)*.99),'Max'])
data_intensity_calibration = data_intensity_calibration[order(data_intensity_calibration$Mean),]
MeanInt_Treshold = log2(data_intensity_calibration[round(length(data_intensity_calibration$Mean)*.99),'Max'])
data_size_calibration = data_size_calibration[order(data_size_calibration$Area),]
Area_Treshold = log2(data_size_calibration[1,'Area'])
data_size_calibration = data_size_calibration[order(data_size_calibration$Major),]
Major_Treshold = log2(data_size_calibration[1,'Major'])
#Plot Cell Major axis
data_summary = ddply(data, .(Selection_Regime, Treatment, Line), summarise,
Small_Negative = sum(log2(Major)<Major_Treshold & log2(Max)<MaxInt_Treshold),
Small_Positive = sum(log2(Major)<Major_Treshold & log2(Max)>MaxInt_Treshold),
Large_Negative = sum(log2(Major)>Major_Treshold & log2(Max)<MaxInt_Treshold),
Large_Positive = sum(log2(Major)>Major_Treshold & log2(Max)>MaxInt_Treshold))
data_summary$Total = (data_summary$Small_Negative + data_summary$Small_Positive + data_summary$Large_Negative + data_summary$Large_Positive)
data_summary$Small_Negative = round(data_summary$Small_Negative/data_summary$Total,2)
data_summary$Small_Positive = round(data_summary$Small_Positive/data_summary$Total,2)
data_summary$Large_Negative = round(data_summary$Large_Negative/data_summary$Total,2)
data_summary$Large_Positive = round(data_summary$Large_Positive/data_summary$Total,2)
data_summary
data_summary_2 = ddply(data_summary, .(Selection_Regime, Treatment), summarise,
Small_Negative = round(mean(Small_Negative),2),
Small_Positive = round(mean(Small_Positive),2),
Large_Negative = round(mean(Large_Negative),2),
Large_Positive = round(mean(Large_Positive),2))
#Plot
color_vector = c('#0072b2','#d55e00')
data$ID = as.factor(paste(data$Selection_Regime, data$Treatment, sep=', '))
CorrCellMaxInt_Simple = ggplot(data, aes(x=log2(Major), y=log2(Max)))+
geom_point(aes(color=Selection_Regime, shape=Line, alpha=Treatment))+
scale_color_manual(values = color_vector)+
scale_alpha_manual(values = c(.5,1))+
scale_shape_manual(values=rep(c(1,2,3),2))+
geom_text(data = data_summary_2, aes(y=log2(min(data$Max))+.15,x=log2(min(data$Major))+.3,label=Small_Negative))+
geom_text(data = data_summary_2, aes(y=log2(max(data$Max))-.15,x=log2(min(data$Major))+.3,label=Small_Positive))+
geom_text(data = data_summary_2, aes(y=log2(min(data$Max))+.15,x=log2(max(data$Major))-.4,label=Large_Negative))+
geom_text(data = data_summary_2, aes(y=log2(max(data$Max))-.15,x=log2(max(data$Major))-.4,label=Large_Positive))+
geom_vline(xintercept = Major_Treshold)+
geom_hline(yintercept = MaxInt_Treshold)+
guides(color=FALSE, shape=FALSE)+
xlab(expression(paste('log'[2], '(Major axis length - ',mu,'m)')))+
ylab(expression(paste('log'[2], '(Atilla fluorescence intesity - arbitary units)')))+
theme_bw()+
theme(panel.grid = element_blank(),
axis.title.x = element_text(colour = "grey0", face='bold',size=12),
axis.text.x = element_text(angle = 0, color='grey0',size=12),
axis.title.y = element_text(colour = "grey0", face='bold',size=12),
axis.text.y = element_text(colour = "grey0", size=12),
strip.text.x = element_text(size=12, angle=0, face = "bold"),
strip.text.y = element_text(size=12, angle=270, face = "bold"),
legend.position = 'none')+
facet_grid(Treatment~Selection_Regime)
CorrCellMaxInt_Simple
pdf(file="MajorAxis_MaxAtillaIntensity.pdf",height=4,width=4)
CorrCellMaxInt_Simple
dev.off()
##Stats
#atillia positive cells are affected by both selection and infection (significant interaction)
data_summary = ddply(data, .(Selection_Regime, Treatment, Line), summarise,
Small_Negative = sum(log2(Major)<Major_Treshold & log2(Max)<MaxInt_Treshold),
Small_Positive = sum(log2(Major)<Major_Treshold & log2(Max)>MaxInt_Treshold),
Large_Negative = sum(log2(Major)>Major_Treshold & log2(Max)<MaxInt_Treshold),
Large_Positive = sum(log2(Major)>Major_Treshold & log2(Max)>MaxInt_Treshold))
data_summary$Total = (data_summary$Small_Negative + data_summary$Small_Positive + data_summary$Large_Negative + data_summary$Large_Positive)
head(data_summary)
data_summary$positive=data_summary$Small_Positive+data_summary$Large_Positive
data_summary$prop_positive=data_summary$positive/data_summary$Total
model=lm(asin(sqrt(prop_positive))~Selection_Regime*Treatment,data=data_summary)
anova(model)
#among the positive cells, size is mostly affected by infection
prop_positive_that_is_large=data_summary$Large_Positive/(data_summary$Large_Negative+data_summary$Large_Positive)
model2=lm(asin(sqrt(prop_positive_that_is_large))~Selection_Regime*Treatment,data=data_summary)
anova(model2)

## Sheet: Figure 5DE _Raw Data
Figure 5DE - Lymph gland lamellocyte (immature and mature) and morphology scoring.
Stage	Selection_Regime	Line	Sample	Left_Lobe_Mature_Lamellocytes	Left_Lobe_Immature_Lamellocytes	Left_Lobe_Phenotype	Right_Lobe_Mature_Lamellocytes	Right_Lobe_Immature_Lamellocytes	Right_Lobe_Phenotype	Phenotype_Descriptive	Phenotype	Immature_Lamellocytes	Mature_Lamellocytes
LL3	High Parasitism	NSRef-1	1	NA	NA	Missing	1	0	Normal	Normal	Normal	No	Yes
LL3	High Parasitism	NSRef-1	2	1	0	Disrupted	1	0	Disrupted	2 disrupted lobes	Disrupted	No	Yes
LL3	High Parasitism	NSRef-1	3	1	0	Disrupted	NA	NA	Missing	1 disrupted lobe	Disrupted	No	Yes
LL3	High Parasitism	NSRef-1	4	1	0	Disrupted	0	0	Normal	1 disrupted lobe	Disrupted	No	Yes
LL3	High Parasitism	NSRef-1	5	0	0	Normal	1	0	Normal	Normal	Normal	No	Yes
LL3	High Parasitism	NSRef-1	6	1	0	Normal	1	0	Disrupted	1 disrupted lobe	Disrupted	No	Yes
LL3	High Parasitism	NSRef-1	7	0	0	Disrupted	NA	NA	Missing	1 disrupted lobe	Disrupted	No	No
LL3	High Parasitism	NSRef-1	8	1	1	Disrupted	0	0	Normal	1 disrupted lobe	Disrupted	Yes	Yes
LL3	High Parasitism	NSRef-1	9	0	0	Normal	0	1	Disrupted	1 disrupted lobe	Disrupted	Yes	No
LL3	High Parasitism	NSRef-1	10	1	0	Disrupted	NA	NA	Missing	1 disrupted lobe	Disrupted	No	Yes
LL3	High Parasitism	NSRef-1	11	1	1	Disrupted	1	0	Normal	1 disrupted lobe	Disrupted	Yes	Yes
LL3	High Parasitism	NSRef-1	12	NA	NA	Missing	NA	NA	Missing	Missing	Missing	NA	NA
LL3	High Parasitism	NSRef-1	13	1	0	Normal	NA	NA	Missing	Normal	Normal	No	Yes
LL3	High Parasitism	NSRef-2	1	1	0	Normal	1	0	Normal	Normal	Normal	No	Yes
LL3	High Parasitism	NSRef-2	2	1	0	Disrupted	1	0	Normal	1 disrupted lobe	Disrupted	No	Yes
LL3	High Parasitism	NSRef-2	3	1	0	Normal	NA	NA	Missing	Normal	Normal	No	Yes
LL3	High Parasitism	NSRef-2	4	NA	NA	Missing	1	0	Normal	Normal	Normal	No	Yes
LL3	High Parasitism	NSRef-2	5	1	0	Disrupted	0	0	Normal	1 disrupted lobe	Disrupted	No	Yes
LL3	High Parasitism	NSRef-2	6	NA	NA	Missing	1	0	Normal	Normal	Normal	No	Yes
LL3	High Parasitism	NSRef-2	7	NA	NA	Bursted	1	1	Normal	1 burst lobe	Disrupted	Yes	Yes
LL3	High Parasitism	NSRef-2	8	1	0	Normal	1	0	Normal	Normal	Normal	No	Yes
LL3	High Parasitism	NSRef-2	9	NA	NA	Bursted	NA	NA	Bursted	2 burst lobes	Burst	Unclassifiable	Unclassifiable
LL3	High Parasitism	NSRef-2	10	0	0	Normal	0	0	Normal	Normal	Normal	No	No
LL3	High Parasitism	NSRef-3	1	1	0	Disrupted	0	0	Disrupted	2 disrupted lobes	Disrupted	No	Yes
LL3	High Parasitism	NSRef-3	2	NA	NA	Bursted	0	0	Disrupted	1 disrupted lobe 1 burst lobe	Burst	No	No
LL3	High Parasitism	NSRef-3	3	1	0	Disrupted	NA	NA	Missing	1 disrupted lobe	Disrupted	No	Yes
LL3	High Parasitism	NSRef-3	4	NA	NA	Missing	0	0	Normal	Normal	Normal	No	No
LL3	High Parasitism	NSRef-3	5	1	0	Disrupted	NA	NA	Bursted	1 disrupted lobe 1 burst lobe	Burst	No	Yes
LL3	High Parasitism	NSRef-3	6	NA	NA	Missing	0	0	Disrupted	1 disrupted lobe	Disrupted	No	No
LL3	High Parasitism	NSRef-3	7	NA	NA	Missing	0	0	Disrupted	1 disrupted lobe	Disrupted	No	No
LL3	High Parasitism	NSRef-3	8	0	0	Disrupted	NA	NA	Missing	1 disrupted lobe	Disrupted	No	No
LL3	High Parasitism	NSRef-3	9	0	0	Normal	0	0	Normal	Normal	Normal	No	No
LL3	High Parasitism	NSRef-3	10	1	0	Disrupted	1	0	Normal	1 disrupted lobe	Disrupted	No	Yes
LL3	High Parasitism	NSRef-3	11	0	0	Normal	0	0	Normal	Normal	Normal	No	No
LL3	High Parasitism	NSRef-3	12	1	0	Normal	0	0	Normal	Normal	Normal	No	Yes
LL3	No Parasitism	C1	1	0	0	Normal	0	0	Normal	Normal	Normal	No	No
LL3	No Parasitism	C1	2	0	0	Normal	0	0	Normal	Normal	Normal	No	No
LL3	No Parasitism	C1	3	1	0	Normal	0	0	Normal	Normal	Normal	No	Yes
LL3	No Parasitism	C1	4	0	0	Normal	0	0	Normal	Normal	Normal	No	No
LL3	No Parasitism	C1	5	0	0	Normal	0	0	Normal	Normal	Normal	No	No
LL3	No Parasitism	C1	6	0	0	Normal	0	0	Normal	Normal	Normal	No	No
LL3	No Parasitism	C1	7	1	0	Normal	0	0	Normal	Normal	Normal	No	Yes
LL3	No Parasitism	C1	8	NA	NA	Bursted	NA	NA	Bursted	2 burst lobes	Burst	Unclassifiable	Unclassifiable
LL3	No Parasitism	C2	1	0	0	Normal	0	0	Normal	Normal	Normal	No	No
LL3	No Parasitism	C2	2	1	0	Normal	NA	NA	Missing	Normal	Normal	No	Yes
LL3	No Parasitism	C2	3	1	0	Disrupted	1	0	Disrupted	2 disrupted lobes	Disrupted	No	Yes
LL3	No Parasitism	C2	4	0	0	Normal	0	0	Normal	Normal	Normal	No	No
LL3	No Parasitism	C2	5	1	0	Normal	1	0	Normal	Normal	Normal	No	Yes
LL3	No Parasitism	C2	6	0	0	Disrupted	0	0	Normal	1 disrupted lobe	Disrupted	No	No
LL3	No Parasitism	C2	7	NA	NA	Missing	1	0	Disrupted	1 disrupted lobe	Disrupted	No	Yes
LL3	No Parasitism	C2	8	1	0	Disrupted	NA	NA	Missing	1 disrupted lobe	Disrupted	No	Yes
LL3	No Parasitism	C2	9	NA	NA	Bursted	NA	NA	Bursted	2 burst lobes	Burst	Unclassifiable	Unclassifiable
LL3	No Parasitism	C2	10	0	0	Normal	NA	NA	Missing	Normal	Normal	No	No
LL3	No Parasitism	C2	11	NA	NA	Missing	0	0	Normal	Normal	Normal	No	No
LL3	No Parasitism	C3	1	1	0	Normal	1	0	Normal	Normal	Normal	No	Yes
LL3	No Parasitism	C3	2	1	0	Disrupted	1	0	Normal	1 disrupted lobe	Disrupted	No	Yes
LL3	No Parasitism	C3	3	1	0	Normal	0	0	Normal	Normal	Normal	No	Yes
LL3	No Parasitism	C3	4	0	0	Normal	0	0	Normal	Normal	Normal	No	No
LL3	No Parasitism	C3	5	0	0	Normal	NA	NA	Missing	Normal	Normal	No	No
LL3	No Parasitism	C3	6	NA	NA	Missing	0	1	Normal	Normal	Normal	Yes	No
LL3	No Parasitism	C3	7	1	0	Normal	1	0	Normal	Normal	Normal	No	Yes
LL3	No Parasitism	C3	8	0	0	Normal	0	0	Normal	Normal	Normal	No	No
LL3	No Parasitism	C3	9	NA	NA	Missing	NA	NA	Missing	Missing	Missing	NA	NA
LL3	No Parasitism	C3	10	0	0	Normal	0	0	Normal	Normal	Normal	No	No
LL3	No Parasitism	C3	11	0	0	Normal	0	0	Normal	Normal	Normal	No	No
LL3	No Parasitism	C3	12	0	0	Normal	0	0	Normal	Normal	Normal	No	No
LL3	No Parasitism	C3	13	0	0	Normal	1	0	Disrupted	1 disrupted lobe	Disrupted	No	Yes
ML3	High Parasitism	NSRef-1	1	1	1	Disrupted	1	1	Normal	1 disrupted lobe	Disrupted	Yes	Yes
ML3	High Parasitism	NSRef-1	2	1	0	Normal	1	1	Disrupted	1 disrupted lobe	Disrupted	Yes	Yes
ML3	High Parasitism	NSRef-1	3	0	0	Disrupted	0	1	Normal	1 disrupted lobe	Disrupted	Yes	No
ML3	High Parasitism	NSRef-1	4	0	0	Normal	0	1	Normal	Normal	Normal	Yes	No
ML3	High Parasitism	NSRef-1	5	NA	NA	Missing	0	1	Normal	Normal	Normal	Yes	No
ML3	High Parasitism	NSRef-1	6	1	1	Normal	NA	NA	Missing	Normal	Normal	Yes	Yes
ML3	High Parasitism	NSRef-1	7	0	1	Normal	0	0	Normal	Normal	Normal	Yes	No
ML3	High Parasitism	NSRef-1	8	0	1	Disrupted	0	1	Disrupted	2 disrupted lobes	Disrupted	Yes	No
ML3	High Parasitism	NSRef-1	9	0	0	Normal	0	0	Normal	Normal	Normal	No	No
ML3	High Parasitism	NSRef-1	10	1	0	Normal	1	0	Normal	Normal	Normal	No	Yes
ML3	High Parasitism	NSRef-1	11	0	0	Normal	0	1	Disrupted	1 disrupted lobe	Disrupted	Yes	No
ML3	High Parasitism	NSRef-1	12	0	1	Normal	0	1	Normal	Normal	Normal	Yes	No
ML3	High Parasitism	NSRef-1	13	1	0	Normal	1	0	Normal	Normal	Normal	No	Yes
ML3	High Parasitism	NSRef-2	1	1	0	Normal	1	0	Normal	Normal	Normal	No	Yes
ML3	High Parasitism	NSRef-2	2	0	0	Normal	0	1	Disrupted	1 disrupted lobe	Disrupted	Yes	No
ML3	High Parasitism	NSRef-2	3	0	0	Normal	0	0	Normal	Normal	Normal	No	No
ML3	High Parasitism	NSRef-2	4	1	0	Normal	0	0	Disrupted	1 disrupted lobe	Disrupted	No	Yes
ML3	High Parasitism	NSRef-2	5	0	0	Normal	0	1	Normal	Normal	Normal	Yes	No
ML3	High Parasitism	NSRef-2	6	1	1	Normal	1	1	Normal	Normal	Normal	Yes	Yes
ML3	High Parasitism	NSRef-2	7	1	1	Normal	NA	NA	Missing	Normal	Normal	Yes	Yes
ML3	High Parasitism	NSRef-2	8	1	1	Disrupted	1	1	Normal	1 disrupted lobe	Disrupted	Yes	Yes
ML3	High Parasitism	NSRef-2	9	0	0	Normal	0	0	Normal	Normal	Normal	No	No
ML3	High Parasitism	NSRef-2	10	0	0	Disrupted	NA	NA	Missing	1 disrupted lobe	Disrupted	No	No
ML3	High Parasitism	NSRef-2	11	0	0	Normal	0	0	Normal	Normal	Normal	No	No
ML3	High Parasitism	NSRef-2	12	NA	NA	Missing	NA	NA	Missing	Missing	Missing	NA	NA
ML3	High Parasitism	NSRef-2	13	NA	NA	Missing	1	1	Normal	Normal	Normal	Yes	Yes
ML3	High Parasitism	NSRef-3	1	NA	NA	Missing	NA	NA	Missing	Missing	Missing	NA	NA
ML3	High Parasitism	NSRef-3	2	0	1	Normal	NA	NA	Missing	Normal	Normal	Yes	No
ML3	High Parasitism	NSRef-3	3	NA	NA	Bursted	0	1	Disrupted	1 disrupted lobe 1 burst lobe	Burst	Yes	No
ML3	High Parasitism	NSRef-3	4	1	0	Normal	0	0	Normal	Normal	Normal	No	Yes
ML3	High Parasitism	NSRef-3	5	NA	NA	Missing	NA	NA	Missing	Missing	Missing	NA	NA
ML3	High Parasitism	NSRef-3	6	0	0	Normal	0	0	Disrupted	1 disrupted lobe	Disrupted	No	No
ML3	High Parasitism	NSRef-3	7	0	1	Normal	0	1	Disrupted	1 disrupted lobe	Disrupted	Yes	No
ML3	High Parasitism	NSRef-3	8	0	0	Normal	0	0	Normal	Normal	Normal	No	No
ML3	High Parasitism	NSRef-3	9	0	0	Normal	0	1	Normal	Normal	Normal	Yes	No
ML3	High Parasitism	NSRef-3	10	0	1	Disrupted	0	0	Disrupted	2 disrupted lobes	Burst	Yes	No
ML3	High Parasitism	NSRef-3	11	1	0	Disrupted	0	0	Normal	1 disrupted lobe	Disrupted	No	Yes
ML3	High Parasitism	NSRef-3	12	0	0	Normal	0	0	Normal	Normal	Normal	No	No
ML3	High Parasitism	NSRef-3	13	NA	NA	Missing	1	0	Normal	Normal	Normal	No	Yes
ML3	High Parasitism	NSRef-3	14	NA	NA	Missing	1	1	Normal	Normal	Normal	Yes	Yes
ML3	No Parasitism	C1	1	0	0	Disrupted	0	0	Normal	1 disrupted lobe	Disrupted	No	No
ML3	No Parasitism	C1	2	0	0	Normal	1	0	Disrupted	1 disrupted lobe	Disrupted	No	Yes
ML3	No Parasitism	C1	3	0	0	Normal	0	0	Disrupted	1 disrupted lobe	Disrupted	No	No
ML3	No Parasitism	C1	4	0	0	Normal	0	0	Normal	Normal	Normal	No	No
ML3	No Parasitism	C1	5	0	0	Normal	0	0	Normal	Normal	Normal	No	No
ML3	No Parasitism	C1	6	0	0	Normal	0	0	Normal	Normal	Normal	No	No
ML3	No Parasitism	C1	7	0	0	Disrupted	0	0	Normal	1 disrupted lobe	Disrupted	No	No
ML3	No Parasitism	C1	8	0	0	Normal	0	0	Normal	Normal	Normal	No	No
ML3	No Parasitism	C1	9	1	0	Disrupted	0	0	Disrupted	2 disrupted lobes	Disrupted	No	Yes
ML3	No Parasitism	C1	10	0	0	Disrupted	0	0	Normal	1 disrupted lobe	Disrupted	No	No
ML3	No Parasitism	C1	11	NA	NA	Missing	NA	NA	Missing	Missing	Missing	NA	NA
ML3	No Parasitism	C1	12	0	0	Normal	0	0	Normal	Normal	Normal	No	No
ML3	No Parasitism	C2	1	0	0	Normal	0	0	Normal	Normal	Normal	No	No
ML3	No Parasitism	C2	2	1	0	Disrupted	1	0	Normal	1 disrupted lobe	Disrupted	No	Yes
ML3	No Parasitism	C2	3	0	0	Normal	0	0	Normal	Normal	Normal	No	No
ML3	No Parasitism	C2	4	0	0	Normal	0	0	Normal	Normal	Normal	No	No
ML3	No Parasitism	C2	5	1	0	Normal	1	0	Normal	Normal	Normal	No	Yes
ML3	No Parasitism	C2	6	0	1	Normal	0	0	Normal	Normal	Normal	Yes	No
ML3	No Parasitism	C2	7	1	0	Disrupted	0	0	Normal	1 disrupted lobe	Disrupted	No	Yes
ML3	No Parasitism	C2	8	NA	NA	Missing	1	0	Normal	Normal	Normal	No	Yes
ML3	No Parasitism	C2	9	0	1	Disrupted	0	0	Normal	1 disrupted lobe	Disrupted	Yes	No
ML3	No Parasitism	C2	10	1	1	Normal	1	1	Normal	Normal	Normal	Yes	Yes
ML3	No Parasitism	C2	11	NA	NA	Missing	NA	NA	Missing	Missing	Missing	NA	NA
ML3	No Parasitism	C3	1	0	1	Normal	0	0	Normal	Normal	Normal	Yes	No
ML3	No Parasitism	C3	2	0	0	Normal	0	0	Normal	Normal	Normal	No	No
ML3	No Parasitism	C3	3	0	0	Disrupted	0	0	Disrupted	2 disrupted lobes	Burst	No	No
ML3	No Parasitism	C3	4	0	0	Disrupted	NA	NA	Bursted	1 disrupted lobe 1 burst lobe	Burst	No	No
ML3	No Parasitism	C3	5	NA	NA	Missing	NA	NA	Missing	Missing	Missing	NA	NA
ML3	No Parasitism	C3	6	0	1	Normal	0	0	Normal	Normal	Normal	Yes	No
ML3	No Parasitism	C3	7	0	0	Normal	0	0	Normal	Normal	Normal	No	No
ML3	No Parasitism	C3	8	0	0	Disrupted	1	0	Normal	1 disrupted lobe	Disrupted	No	Yes
ML3	No Parasitism	C3	9	0	0	Normal	0	0	Normal	Normal	Normal	No	No
ML3	No Parasitism	C3	10	NA	NA	Missing	0	1	Normal	Normal	Normal	Yes	No
ML3	No Parasitism	C3	11	1	0	Normal	1	1	Normal	Normal	Normal	Yes	Yes
ML3	No Parasitism	C3	12	0	0	Normal	0	0	Normal	Normal	Normal	No	No
ML3	No Parasitism	C3	13	NA	NA	Missing	1	1	Normal	Normal	Normal	Yes	Yes

## Sheet: Figure 5DE _Data format stats
Figure 5DE - Lymph gland lamellocyte (immature and mature) and morphology scoring data formatted for statistical analysis
Stage	Selection_Regime	Line	Sample	Lobe	Disrupted_Lymph_Gland	Burst_Lymph_Gland	Immature_Lamellocytes	Mature_Lamellocytes	ID
LL3	High Parasitism	NSRef-1	1	Left	NA	NA	NA	NA	LL3 NSRef-1 1
LL3	High Parasitism	NSRef-1	1	Right	0	0	0	1	LL3 NSRef-1 1
LL3	High Parasitism	NSRef-1	2	Left	1	0	0	1	LL3 NSRef-1 2
LL3	High Parasitism	NSRef-1	2	Right	1	0	0	1	LL3 NSRef-1 2
LL3	High Parasitism	NSRef-1	3	Left	1	0	0	1	LL3 NSRef-1 3
LL3	High Parasitism	NSRef-1	3	Right	NA	NA	NA	NA	LL3 NSRef-1 3
LL3	High Parasitism	NSRef-1	4	Left	1	0	0	1	LL3 NSRef-1 4
LL3	High Parasitism	NSRef-1	4	Right	0	0	0	0	LL3 NSRef-1 4
LL3	High Parasitism	NSRef-1	5	Left	0	0	0	0	LL3 NSRef-1 5
LL3	High Parasitism	NSRef-1	5	Right	0	0	0	1	LL3 NSRef-1 5
LL3	High Parasitism	NSRef-1	6	Left	0	0	0	1	LL3 NSRef-1 6
LL3	High Parasitism	NSRef-1	6	Right	1	0	0	1	LL3 NSRef-1 6
LL3	High Parasitism	NSRef-1	7	Left	1	0	0	0	LL3 NSRef-1 7
LL3	High Parasitism	NSRef-1	7	Right	NA	NA	NA	NA	LL3 NSRef-1 7
LL3	High Parasitism	NSRef-1	8	Left	1	0	1	1	LL3 NSRef-1 8
LL3	High Parasitism	NSRef-1	8	Right	0	0	0	0	LL3 NSRef-1 8
LL3	High Parasitism	NSRef-1	9	Left	0	0	0	0	LL3 NSRef-1 9
LL3	High Parasitism	NSRef-1	9	Right	1	0	1	0	LL3 NSRef-1 9
LL3	High Parasitism	NSRef-1	10	Left	1	0	0	1	LL3 NSRef-1 10
LL3	High Parasitism	NSRef-1	10	Right	NA	NA	NA	NA	LL3 NSRef-1 10
LL3	High Parasitism	NSRef-1	11	Left	1	0	1	1	LL3 NSRef-1 11
LL3	High Parasitism	NSRef-1	11	Right	0	0	0	1	LL3 NSRef-1 11
LL3	High Parasitism	NSRef-1	13	Left	0	0	0	1	LL3 NSRef-1 13
LL3	High Parasitism	NSRef-1	13	Right	NA	NA	NA	NA	LL3 NSRef-1 13
LL3	High Parasitism	NSRef-2	1	Left	0	0	0	1	LL3 NSRef-2 1
LL3	High Parasitism	NSRef-2	1	Right	0	0	0	1	LL3 NSRef-2 1
LL3	High Parasitism	NSRef-2	2	Left	1	0	0	1	LL3 NSRef-2 2
LL3	High Parasitism	NSRef-2	2	Right	0	0	0	1	LL3 NSRef-2 2
LL3	High Parasitism	NSRef-2	3	Left	0	0	0	1	LL3 NSRef-2 3
LL3	High Parasitism	NSRef-2	3	Right	NA	NA	NA	NA	LL3 NSRef-2 3
LL3	High Parasitism	NSRef-2	4	Left	NA	NA	NA	NA	LL3 NSRef-2 4
LL3	High Parasitism	NSRef-2	4	Right	0	0	0	1	LL3 NSRef-2 4
LL3	High Parasitism	NSRef-2	5	Left	1	0	0	1	LL3 NSRef-2 5
LL3	High Parasitism	NSRef-2	5	Right	0	0	0	0	LL3 NSRef-2 5
LL3	High Parasitism	NSRef-2	6	Left	NA	NA	NA	NA	LL3 NSRef-2 6
LL3	High Parasitism	NSRef-2	6	Right	0	0	0	1	LL3 NSRef-2 6
LL3	High Parasitism	NSRef-2	7	Left	0	1	NA	NA	LL3 NSRef-2 7
LL3	High Parasitism	NSRef-2	7	Right	0	0	1	1	LL3 NSRef-2 7
LL3	High Parasitism	NSRef-2	8	Left	0	0	0	1	LL3 NSRef-2 8
LL3	High Parasitism	NSRef-2	8	Right	0	0	0	1	LL3 NSRef-2 8
LL3	High Parasitism	NSRef-2	9	Left	0	1	NA	NA	LL3 NSRef-2 9
LL3	High Parasitism	NSRef-2	9	Right	0	1	NA	NA	LL3 NSRef-2 9
LL3	High Parasitism	NSRef-2	10	Left	0	0	0	0	LL3 NSRef-2 10
LL3	High Parasitism	NSRef-2	10	Right	0	0	0	0	LL3 NSRef-2 10
LL3	High Parasitism	NSRef-3	1	Left	1	0	0	1	LL3 NSRef-3 1
LL3	High Parasitism	NSRef-3	1	Right	1	0	0	0	LL3 NSRef-3 1
LL3	High Parasitism	NSRef-3	2	Left	0	1	NA	NA	LL3 NSRef-3 2
LL3	High Parasitism	NSRef-3	2	Right	1	0	0	0	LL3 NSRef-3 2
LL3	High Parasitism	NSRef-3	3	Left	1	0	0	1	LL3 NSRef-3 3
LL3	High Parasitism	NSRef-3	3	Right	NA	NA	NA	NA	LL3 NSRef-3 3
LL3	High Parasitism	NSRef-3	4	Left	NA	NA	NA	NA	LL3 NSRef-3 4
LL3	High Parasitism	NSRef-3	4	Right	0	0	0	0	LL3 NSRef-3 4
LL3	High Parasitism	NSRef-3	5	Left	1	0	0	1	LL3 NSRef-3 5
LL3	High Parasitism	NSRef-3	5	Right	0	1	NA	NA	LL3 NSRef-3 5
LL3	High Parasitism	NSRef-3	6	Left	NA	NA	NA	NA	LL3 NSRef-3 6
LL3	High Parasitism	NSRef-3	6	Right	1	0	0	0	LL3 NSRef-3 6
LL3	High Parasitism	NSRef-3	7	Left	NA	NA	NA	NA	LL3 NSRef-3 7
LL3	High Parasitism	NSRef-3	7	Right	1	0	0	0	LL3 NSRef-3 7
LL3	High Parasitism	NSRef-3	8	Left	1	0	0	0	LL3 NSRef-3 8
LL3	High Parasitism	NSRef-3	8	Right	NA	NA	NA	NA	LL3 NSRef-3 8
LL3	High Parasitism	NSRef-3	9	Left	0	0	0	0	LL3 NSRef-3 9
LL3	High Parasitism	NSRef-3	9	Right	0	0	0	0	LL3 NSRef-3 9
LL3	High Parasitism	NSRef-3	10	Left	1	0	0	1	LL3 NSRef-3 10
LL3	High Parasitism	NSRef-3	10	Right	0	0	0	1	LL3 NSRef-3 10
LL3	High Parasitism	NSRef-3	11	Left	0	0	0	0	LL3 NSRef-3 11
LL3	High Parasitism	NSRef-3	11	Right	0	0	0	0	LL3 NSRef-3 11
LL3	High Parasitism	NSRef-3	12	Left	0	0	0	1	LL3 NSRef-3 12
LL3	High Parasitism	NSRef-3	12	Right	0	0	0	0	LL3 NSRef-3 12
LL3	No Parasitism	C1	1	Left	0	0	0	0	LL3 C1 1
LL3	No Parasitism	C1	1	Right	0	0	0	0	LL3 C1 1
LL3	No Parasitism	C1	2	Left	0	0	0	0	LL3 C1 2
LL3	No Parasitism	C1	2	Right	0	0	0	0	LL3 C1 2
LL3	No Parasitism	C1	3	Left	0	0	0	1	LL3 C1 3
LL3	No Parasitism	C1	3	Right	0	0	0	0	LL3 C1 3
LL3	No Parasitism	C1	4	Left	0	0	0	0	LL3 C1 4
LL3	No Parasitism	C1	4	Right	0	0	0	0	LL3 C1 4
LL3	No Parasitism	C1	5	Left	0	0	0	0	LL3 C1 5
LL3	No Parasitism	C1	5	Right	0	0	0	0	LL3 C1 5
LL3	No Parasitism	C1	6	Left	0	0	0	0	LL3 C1 6
LL3	No Parasitism	C1	6	Right	0	0	0	0	LL3 C1 6
LL3	No Parasitism	C1	7	Left	0	0	0	1	LL3 C1 7
LL3	No Parasitism	C1	7	Right	0	0	0	0	LL3 C1 7
LL3	No Parasitism	C1	8	Left	0	1	NA	NA	LL3 C1 8
LL3	No Parasitism	C1	8	Right	0	1	NA	NA	LL3 C1 8
LL3	No Parasitism	C2	1	Left	0	0	0	0	LL3 C2 1
LL3	No Parasitism	C2	1	Right	0	0	0	0	LL3 C2 1
LL3	No Parasitism	C2	2	Left	0	0	0	1	LL3 C2 2
LL3	No Parasitism	C2	2	Right	NA	NA	NA	NA	LL3 C2 2
LL3	No Parasitism	C2	3	Left	1	0	0	1	LL3 C2 3
LL3	No Parasitism	C2	3	Right	1	0	0	1	LL3 C2 3
LL3	No Parasitism	C2	4	Left	0	0	0	0	LL3 C2 4
LL3	No Parasitism	C2	4	Right	0	0	0	0	LL3 C2 4
LL3	No Parasitism	C2	5	Left	0	0	0	1	LL3 C2 5
LL3	No Parasitism	C2	5	Right	0	0	0	1	LL3 C2 5
LL3	No Parasitism	C2	6	Left	1	0	0	0	LL3 C2 6
LL3	No Parasitism	C2	6	Right	0	0	0	0	LL3 C2 6
LL3	No Parasitism	C2	7	Left	NA	NA	NA	NA	LL3 C2 7
LL3	No Parasitism	C2	7	Right	1	0	0	1	LL3 C2 7
LL3	No Parasitism	C2	8	Left	1	0	0	1	LL3 C2 8
LL3	No Parasitism	C2	8	Right	NA	NA	NA	NA	LL3 C2 8
LL3	No Parasitism	C2	9	Left	0	1	NA	NA	LL3 C2 9
LL3	No Parasitism	C2	9	Right	0	1	NA	NA	LL3 C2 9
LL3	No Parasitism	C2	10	Left	0	0	0	0	LL3 C2 10
LL3	No Parasitism	C2	10	Right	NA	NA	NA	NA	LL3 C2 10
LL3	No Parasitism	C2	11	Left	NA	NA	NA	NA	LL3 C2 11
LL3	No Parasitism	C2	11	Right	0	0	0	0	LL3 C2 11
LL3	No Parasitism	C3	1	Left	0	0	0	1	LL3 C3 1
LL3	No Parasitism	C3	1	Right	0	0	0	1	LL3 C3 1
LL3	No Parasitism	C3	2	Left	1	0	0	1	LL3 C3 2
LL3	No Parasitism	C3	2	Right	0	0	0	1	LL3 C3 2
LL3	No Parasitism	C3	3	Left	0	0	0	1	LL3 C3 3
LL3	No Parasitism	C3	3	Right	0	0	0	0	LL3 C3 3
LL3	No Parasitism	C3	4	Left	0	0	0	0	LL3 C3 4
LL3	No Parasitism	C3	4	Right	0	0	0	0	LL3 C3 4
LL3	No Parasitism	C3	5	Left	0	0	0	0	LL3 C3 5
LL3	No Parasitism	C3	5	Right	NA	NA	NA	NA	LL3 C3 5
LL3	No Parasitism	C3	6	Left	NA	NA	NA	NA	LL3 C3 6
LL3	No Parasitism	C3	6	Right	0	0	1	0	LL3 C3 6
LL3	No Parasitism	C3	7	Left	0	0	0	1	LL3 C3 7
LL3	No Parasitism	C3	7	Right	0	0	0	1	LL3 C3 7
LL3	No Parasitism	C3	8	Left	0	0	0	0	LL3 C3 8
LL3	No Parasitism	C3	8	Right	0	0	0	0	LL3 C3 8
LL3	No Parasitism	C3	10	Left	0	0	0	0	LL3 C3 10
LL3	No Parasitism	C3	10	Right	0	0	0	0	LL3 C3 10
LL3	No Parasitism	C3	11	Left	0	0	0	0	LL3 C3 11
LL3	No Parasitism	C3	11	Right	0	0	0	0	LL3 C3 11
LL3	No Parasitism	C3	12	Left	0	0	0	0	LL3 C3 12
LL3	No Parasitism	C3	12	Right	0	0	0	0	LL3 C3 12
LL3	No Parasitism	C3	13	Left	0	0	0	0	LL3 C3 13
LL3	No Parasitism	C3	13	Right	1	0	0	1	LL3 C3 13
ML3	High Parasitism	NSRef-1	1	Left	1	0	1	1	ML3 NSRef-1 1
ML3	High Parasitism	NSRef-1	1	Right	0	0	1	1	ML3 NSRef-1 1
ML3	High Parasitism	NSRef-1	2	Left	0	0	0	1	ML3 NSRef-1 2
ML3	High Parasitism	NSRef-1	2	Right	1	0	1	1	ML3 NSRef-1 2
ML3	High Parasitism	NSRef-1	3	Left	1	0	0	0	ML3 NSRef-1 3
ML3	High Parasitism	NSRef-1	3	Right	0	0	1	0	ML3 NSRef-1 3
ML3	High Parasitism	NSRef-1	4	Left	0	0	0	0	ML3 NSRef-1 4
ML3	High Parasitism	NSRef-1	4	Right	0	0	1	0	ML3 NSRef-1 4
ML3	High Parasitism	NSRef-1	5	Left	NA	NA	NA	NA	ML3 NSRef-1 5
ML3	High Parasitism	NSRef-1	5	Right	0	0	1	0	ML3 NSRef-1 5
ML3	High Parasitism	NSRef-1	6	Left	0	0	1	1	ML3 NSRef-1 6
ML3	High Parasitism	NSRef-1	6	Right	NA	NA	NA	NA	ML3 NSRef-1 6
ML3	High Parasitism	NSRef-1	7	Left	0	0	1	0	ML3 NSRef-1 7
ML3	High Parasitism	NSRef-1	7	Right	0	0	0	0	ML3 NSRef-1 7
ML3	High Parasitism	NSRef-1	8	Left	1	0	1	0	ML3 NSRef-1 8
ML3	High Parasitism	NSRef-1	8	Right	1	0	1	0	ML3 NSRef-1 8
ML3	High Parasitism	NSRef-1	9	Left	0	0	0	0	ML3 NSRef-1 9
ML3	High Parasitism	NSRef-1	9	Right	0	0	0	0	ML3 NSRef-1 9
ML3	High Parasitism	NSRef-1	10	Left	0	0	0	1	ML3 NSRef-1 10
ML3	High Parasitism	NSRef-1	10	Right	0	0	0	1	ML3 NSRef-1 10
ML3	High Parasitism	NSRef-1	11	Left	0	0	0	0	ML3 NSRef-1 11
ML3	High Parasitism	NSRef-1	11	Right	1	0	1	0	ML3 NSRef-1 11
ML3	High Parasitism	NSRef-1	12	Left	0	0	1	0	ML3 NSRef-1 12
ML3	High Parasitism	NSRef-1	12	Right	0	0	1	0	ML3 NSRef-1 12
ML3	High Parasitism	NSRef-1	13	Left	0	0	0	1	ML3 NSRef-1 13
ML3	High Parasitism	NSRef-1	13	Right	0	0	0	1	ML3 NSRef-1 13
ML3	High Parasitism	NSRef-2	1	Left	0	0	0	1	ML3 NSRef-2 1
ML3	High Parasitism	NSRef-2	1	Right	0	0	0	1	ML3 NSRef-2 1
ML3	High Parasitism	NSRef-2	2	Left	0	0	0	0	ML3 NSRef-2 2
ML3	High Parasitism	NSRef-2	2	Right	1	0	1	0	ML3 NSRef-2 2
ML3	High Parasitism	NSRef-2	3	Left	0	0	0	0	ML3 NSRef-2 3
ML3	High Parasitism	NSRef-2	3	Right	0	0	0	0	ML3 NSRef-2 3
ML3	High Parasitism	NSRef-2	4	Left	0	0	0	1	ML3 NSRef-2 4
ML3	High Parasitism	NSRef-2	4	Right	1	0	0	0	ML3 NSRef-2 4
ML3	High Parasitism	NSRef-2	5	Left	0	0	0	0	ML3 NSRef-2 5
ML3	High Parasitism	NSRef-2	5	Right	0	0	1	0	ML3 NSRef-2 5
ML3	High Parasitism	NSRef-2	6	Left	0	0	1	1	ML3 NSRef-2 6
ML3	High Parasitism	NSRef-2	6	Right	0	0	1	1	ML3 NSRef-2 6
ML3	High Parasitism	NSRef-2	7	Left	0	0	1	1	ML3 NSRef-2 7
ML3	High Parasitism	NSRef-2	7	Right	NA	NA	NA	NA	ML3 NSRef-2 7
ML3	High Parasitism	NSRef-2	8	Left	1	0	1	1	ML3 NSRef-2 8
ML3	High Parasitism	NSRef-2	8	Right	0	0	1	1	ML3 NSRef-2 8
ML3	High Parasitism	NSRef-2	9	Left	0	0	0	0	ML3 NSRef-2 9
ML3	High Parasitism	NSRef-2	9	Right	0	0	0	0	ML3 NSRef-2 9
ML3	High Parasitism	NSRef-2	10	Left	1	0	0	0	ML3 NSRef-2 10
ML3	High Parasitism	NSRef-2	10	Right	NA	NA	NA	NA	ML3 NSRef-2 10
ML3	High Parasitism	NSRef-2	11	Left	0	0	0	0	ML3 NSRef-2 11
ML3	High Parasitism	NSRef-2	11	Right	0	0	0	0	ML3 NSRef-2 11
ML3	High Parasitism	NSRef-2	13	Left	NA	NA	NA	NA	ML3 NSRef-2 13
ML3	High Parasitism	NSRef-2	13	Right	0	0	1	1	ML3 NSRef-2 13
ML3	High Parasitism	NSRef-3	2	Left	0	0	1	0	ML3 NSRef-3 2
ML3	High Parasitism	NSRef-3	2	Right	NA	NA	NA	NA	ML3 NSRef-3 2
ML3	High Parasitism	NSRef-3	3	Left	0	1	NA	NA	ML3 NSRef-3 3
ML3	High Parasitism	NSRef-3	3	Right	1	0	1	0	ML3 NSRef-3 3
ML3	High Parasitism	NSRef-3	4	Left	0	0	0	1	ML3 NSRef-3 4
ML3	High Parasitism	NSRef-3	4	Right	0	0	0	0	ML3 NSRef-3 4
ML3	High Parasitism	NSRef-3	6	Left	0	0	0	0	ML3 NSRef-3 6
ML3	High Parasitism	NSRef-3	6	Right	1	0	0	0	ML3 NSRef-3 6
ML3	High Parasitism	NSRef-3	7	Left	0	0	1	0	ML3 NSRef-3 7
ML3	High Parasitism	NSRef-3	7	Right	1	0	1	0	ML3 NSRef-3 7
ML3	High Parasitism	NSRef-3	8	Left	0	0	0	0	ML3 NSRef-3 8
ML3	High Parasitism	NSRef-3	8	Right	0	0	0	0	ML3 NSRef-3 8
ML3	High Parasitism	NSRef-3	9	Left	0	0	0	0	ML3 NSRef-3 9
ML3	High Parasitism	NSRef-3	9	Right	0	0	1	0	ML3 NSRef-3 9
ML3	High Parasitism	NSRef-3	10	Left	1	0	1	0	ML3 NSRef-3 10
ML3	High Parasitism	NSRef-3	10	Right	1	0	0	0	ML3 NSRef-3 10
ML3	High Parasitism	NSRef-3	11	Left	1	0	0	1	ML3 NSRef-3 11
ML3	High Parasitism	NSRef-3	11	Right	0	0	0	0	ML3 NSRef-3 11
ML3	High Parasitism	NSRef-3	12	Left	0	0	0	0	ML3 NSRef-3 12
ML3	High Parasitism	NSRef-3	12	Right	0	0	0	0	ML3 NSRef-3 12
ML3	High Parasitism	NSRef-3	13	Left	NA	NA	NA	NA	ML3 NSRef-3 13
ML3	High Parasitism	NSRef-3	13	Right	0	0	0	1	ML3 NSRef-3 13
ML3	High Parasitism	NSRef-3	14	Left	NA	NA	NA	NA	ML3 NSRef-3 14
ML3	High Parasitism	NSRef-3	14	Right	0	0	1	1	ML3 NSRef-3 14
ML3	No Parasitism	C1	1	Left	1	0	0	0	ML3 C1 1
ML3	No Parasitism	C1	1	Right	0	0	0	0	ML3 C1 1
ML3	No Parasitism	C1	2	Left	0	0	0	0	ML3 C1 2
ML3	No Parasitism	C1	2	Right	1	0	0	1	ML3 C1 2
ML3	No Parasitism	C1	3	Left	0	0	0	0	ML3 C1 3
ML3	No Parasitism	C1	3	Right	1	0	0	0	ML3 C1 3
ML3	No Parasitism	C1	4	Left	0	0	0	0	ML3 C1 4
ML3	No Parasitism	C1	4	Right	0	0	0	0	ML3 C1 4
ML3	No Parasitism	C1	5	Left	0	0	0	0	ML3 C1 5
ML3	No Parasitism	C1	5	Right	0	0	0	0	ML3 C1 5
ML3	No Parasitism	C1	6	Left	0	0	0	0	ML3 C1 6
ML3	No Parasitism	C1	6	Right	0	0	0	0	ML3 C1 6
ML3	No Parasitism	C1	7	Left	1	0	0	0	ML3 C1 7
ML3	No Parasitism	C1	7	Right	0	0	0	0	ML3 C1 7
ML3	No Parasitism	C1	8	Left	0	0	0	0	ML3 C1 8
ML3	No Parasitism	C1	8	Right	0	0	0	0	ML3 C1 8
ML3	No Parasitism	C1	9	Left	1	0	0	1	ML3 C1 9
ML3	No Parasitism	C1	9	Right	1	0	0	0	ML3 C1 9
ML3	No Parasitism	C1	10	Left	1	0	0	0	ML3 C1 10
ML3	No Parasitism	C1	10	Right	0	0	0	0	ML3 C1 10
ML3	No Parasitism	C1	12	Left	0	0	0	0	ML3 C1 12
ML3	No Parasitism	C1	12	Right	0	0	0	0	ML3 C1 12
ML3	No Parasitism	C2	1	Left	0	0	0	0	ML3 C2 1
ML3	No Parasitism	C2	1	Right	0	0	0	0	ML3 C2 1
ML3	No Parasitism	C2	2	Left	1	0	0	1	ML3 C2 2
ML3	No Parasitism	C2	2	Right	0	0	0	1	ML3 C2 2
ML3	No Parasitism	C2	3	Left	0	0	0	0	ML3 C2 3
ML3	No Parasitism	C2	3	Right	0	0	0	0	ML3 C2 3
ML3	No Parasitism	C2	4	Left	0	0	0	0	ML3 C2 4
ML3	No Parasitism	C2	4	Right	0	0	0	0	ML3 C2 4
ML3	No Parasitism	C2	5	Left	0	0	0	1	ML3 C2 5
ML3	No Parasitism	C2	5	Right	0	0	0	1	ML3 C2 5
ML3	No Parasitism	C2	6	Left	0	0	1	0	ML3 C2 6
ML3	No Parasitism	C2	6	Right	0	0	0	0	ML3 C2 6
ML3	No Parasitism	C2	7	Left	1	0	0	1	ML3 C2 7
ML3	No Parasitism	C2	7	Right	0	0	0	0	ML3 C2 7
ML3	No Parasitism	C2	8	Left	NA	NA	NA	NA	ML3 C2 8
ML3	No Parasitism	C2	8	Right	0	0	0	1	ML3 C2 8
ML3	No Parasitism	C2	9	Left	1	0	1	0	ML3 C2 9
ML3	No Parasitism	C2	9	Right	0	0	0	0	ML3 C2 9
ML3	No Parasitism	C2	10	Left	0	0	1	1	ML3 C2 10
ML3	No Parasitism	C2	10	Right	0	0	1	1	ML3 C2 10
ML3	No Parasitism	C3	1	Left	0	0	1	0	ML3 C3 1
ML3	No Parasitism	C3	1	Right	0	0	0	0	ML3 C3 1
ML3	No Parasitism	C3	2	Left	0	0	0	0	ML3 C3 2
ML3	No Parasitism	C3	2	Right	0	0	0	0	ML3 C3 2
ML3	No Parasitism	C3	3	Left	1	0	0	0	ML3 C3 3
ML3	No Parasitism	C3	3	Right	1	0	0	0	ML3 C3 3
ML3	No Parasitism	C3	4	Left	1	0	0	0	ML3 C3 4
ML3	No Parasitism	C3	4	Right	0	1	NA	NA	ML3 C3 4
ML3	No Parasitism	C3	6	Left	0	0	1	0	ML3 C3 6
ML3	No Parasitism	C3	6	Right	0	0	0	0	ML3 C3 6
ML3	No Parasitism	C3	7	Left	0	0	0	0	ML3 C3 7
ML3	No Parasitism	C3	7	Right	0	0	0	0	ML3 C3 7
ML3	No Parasitism	C3	8	Left	1	0	0	0	ML3 C3 8
ML3	No Parasitism	C3	8	Right	0	0	0	1	ML3 C3 8
ML3	No Parasitism	C3	9	Left	0	0	0	0	ML3 C3 9
ML3	No Parasitism	C3	9	Right	0	0	0	0	ML3 C3 9
ML3	No Parasitism	C3	10	Left	NA	NA	NA	NA	ML3 C3 10
ML3	No Parasitism	C3	10	Right	0	0	1	0	ML3 C3 10
ML3	No Parasitism	C3	11	Left	0	0	0	1	ML3 C3 11
ML3	No Parasitism	C3	11	Right	0	0	1	1	ML3 C3 11
ML3	No Parasitism	C3	12	Left	0	0	0	0	ML3 C3 12
ML3	No Parasitism	C3	12	Right	0	0	0	0	ML3 C3 12
ML3	No Parasitism	C3	13	Left	NA	NA	NA	NA	ML3 C3 13
ML3	No Parasitism	C3	13	Right	0	0	1	1	ML3 C3 13

## Sheet: Figure 5D - R script for graph
###To run script: Delete first two rows of raw data, save it as .csv format and run script on R
library(ggplot2)
library(plyr)
###Load data
setwd(dirname(rstudioapi::getActiveDocumentContext()$path))
list.files()
data = read.table('Figure 5DE _Raw Data', sep=',',dec='.', head=T)
head(data)
#Filter data
data = data[!data$Phenotype=='Missing',] #samples where it was not possible to take pictures
#Order factors
data$Selection_Regime = factor(data$Selection_Regime, levels=c('No Parasitism','High Parasitism'))
data$Stage = factor(data$Stage, levels=c('ML3','LL3'))
#Create data summary with proportions of Immature and Mature lamellocytes. When both lymph gland lobes are bursted it is not possible to classify lamellocyte staining
data_summary = ddply(data[!data$Immature_Lamellocytes=='Inclassifiable',],.(Stage, Selection_Regime, Line), summarise,
Immature_Lamellocytes = sum(Immature_Lamellocytes=='Yes')/(sum(Immature_Lamellocytes=='Yes')+sum(Immature_Lamellocytes=='No')),
Mature_Lamellocytes = sum(Mature_Lamellocytes=='Yes')/(sum(Mature_Lamellocytes=='Yes')+sum(Mature_Lamellocytes=='No')))
data_summary_2 = ddply(data_summary,.(Stage, Selection_Regime), summarise,
Immature_Lamellocytes = mean(Immature_Lamellocytes),
Mature_Lamellocytes = mean(Mature_Lamellocytes))
library(reshape2)
mdata_summary = melt(data_summary, id=c("Stage","Selection_Regime", "Line"), variable.name = "Cell_Type", value.name = "Proportion")
mdata_summary_2 = melt(data_summary_2, id=c("Stage","Selection_Regime"), variable.name = "Cell_Type", value.name = "Proportion")
#To plot data
color_vector = c('#0072b2','#d55e00')
#reduce the jargon a bit:
stage.labs <- c(
`ML3` = "Mid L3 larvae",
`LL3` = "Late L3 larvae")
p1 = ggplot(mdata_summary_2, aes(x=Cell_Type, y=Proportion))+
geom_bar(stat='identity', aes(fill=Selection_Regime), alpha=.5, position = position_dodge(width=.9))+
geom_point(data=mdata_summary, aes(group=Selection_Regime), position = position_dodge(width=.9))+
scale_fill_manual(name='Selection regime', values = color_vector)+
scale_alpha_manual(values = c(.5,1))+
scale_linetype_manual(values=c(1,1))+
scale_x_discrete(labels=c("Immature_Lamellocytes" = 'Immature\nlamellocytes',
"Mature_Lamellocytes" = "Mature\nlamellocytes"))+
theme_bw()+
xlab(expression('Cell type'))+
ylab(expression('Proportion of lymph glands'))+
scale_y_continuous(expand = c(0, 0), limits=c(0, 1))+
theme(panel.grid = element_blank(),
axis.title.x = element_text(colour = "grey30", face='bold',size=15),
axis.text.x = element_text(angle = 0, color='grey30',size=12),
axis.title.y = element_text(colour = "grey30", face='bold',size=15),
axis.text.y = element_text(size=15),
panel.border = element_blank(),
axis.line = element_line(colour = "grey30"),
legend.box = "horizontal",
legend.title=element_text(size=10),
legend.text=element_text(size=10),
legend.key.size = unit(.3, "cm"),
legend.margin = margin(0,0,0,0, unit="cm"),
legend.position = 'none',
strip.text.x = element_text(size = 12, , face = "bold"))+
facet_grid(.~Stage,labeller = as_labeller(stage.labs))
p1
pdf(file="Lymph_Glands_LarvaStageFacet.pdf",height=5,width=6)
p1
dev.off()
stage.labs <- c(
`Immature_Lamellocytes` = "Immature\nlamellocytes",
`Mature_Lamellocytes` = "Mature\nlamellocytes")
p2 = ggplot(mdata_summary_2, aes(x=Stage, y=Proportion))+
geom_bar(stat='identity', aes(fill=Selection_Regime), alpha=.5, position = position_dodge(width=.9))+
geom_point(data=mdata_summary, aes(group=Selection_Regime), position = position_dodge(width=.9))+
scale_fill_manual(name='Selection regime', values = color_vector)+
scale_alpha_manual(values = c(.5,1))+
scale_linetype_manual(values=c(1,1))+
scale_x_discrete(labels=c("ML3" = 'Mid L3',
"LL3" = "Late L3"))+
theme_bw()+
xlab(expression('Larva developmental stage'))+
ylab(expression('Proportion of lymph glands'))+
scale_y_continuous(expand = c(0, 0), limits=c(0, 1))+
theme(panel.grid = element_blank(),
axis.title.x = element_text(colour = "grey0", face='bold',size=13, margin = margin(t = 10)),
axis.text.x = element_text(angle = 0, color='grey0',size=12),
axis.title.y = element_text(colour = "grey0", face='bold',size=13),
axis.text.y = element_text(colour = "grey0", size=12),
panel.border = element_blank(),
axis.line = element_line(colour = "grey0"),
legend.box = "horizontal",
legend.title=element_text(size=10),
legend.text=element_text(size=10),
legend.key.size = unit(.3, "cm"),
legend.margin = margin(0,0,0,0, unit="cm"),
legend.position = 'none',
strip.text.x = element_text(size = 12, , face = "bold"))+
facet_grid(.~Cell_Type,labeller = as_labeller(stage.labs))
p2
pdf(file="Lymph_Glands_CellTypeFacet.pdf",height=3.5,width=4)
p2
dev.off()

## Sheet: Figure 5D- R script for stats
###To run script: Delete first two rows of data formatted for stats, save it as .csv format and run script on R
#Stats
library(car)
library(lme4)
data2 = read.table('Figure 5DE _Data format stats.csv', sep=',',dec='.', head=T)
###############use data from both lobes
m_Immature_Lamellocytes = glmer(Immature_Lamellocytes ~ Selection_Regime*Stage + (1|Line)+(1|ID),family=binomial, data=data2)
Anova(m_Immature_Lamellocytes, type="II")
m_Mature_Lamellocytes = glmer(Mature_Lamellocytes ~ Selection_Regime*Stage + (1|Line)+(1|ID),family=binomial, data=data2)
Anova(m_Mature_Lamellocytes, type="II")
m_Immature_Lamellocytes = glmer(Immature_Lamellocytes ~ Selection_Regime+Stage + (1|Line)+(1|ID),family=binomial, data=data2)
Anova(m_Immature_Lamellocytes, type="II")
m_Mature_Lamellocytes = glmer(Mature_Lamellocytes ~ Selection_Regime+Stage + (1|Line)+(1|ID),family=binomial, data=data2)
Anova(m_Mature_Lamellocytes, type="II")

[truncated: 2 more sheets: Figure 5E - R script for graph, Figure 5E- R script for stats]
