# Supplementary material for: Constitutive activation of cellular immunity underlies the evolution of resistance to infection in Drosophila
Source: eLife journal article supplement (doi:10.7554/elife.59095), 2020-12-24
Supplement: supp [file elife-59095-supp-v1.zip]

Nuclei hoechst33342

Actin Phalloidin-594

atilla L1-488

Composite

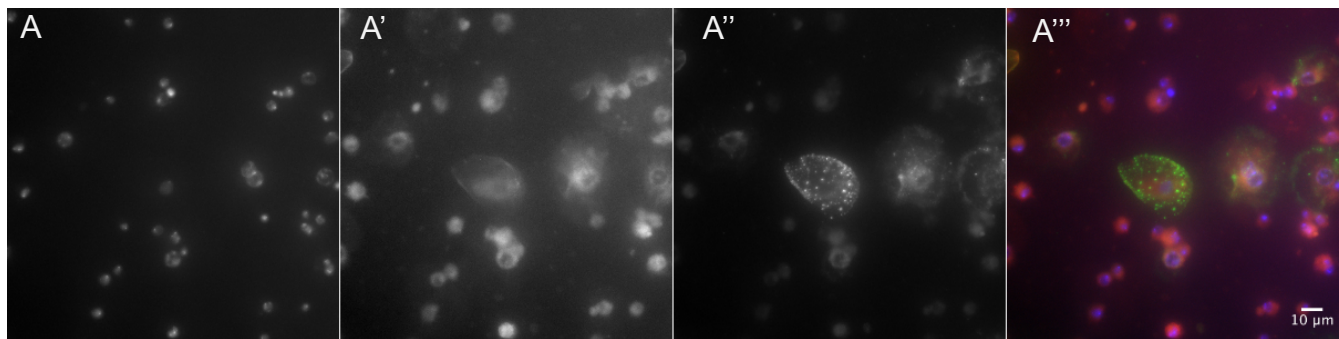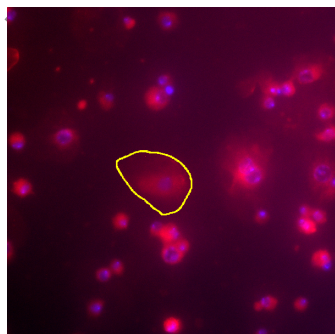

Identify cells with nuclear  
and actin staining

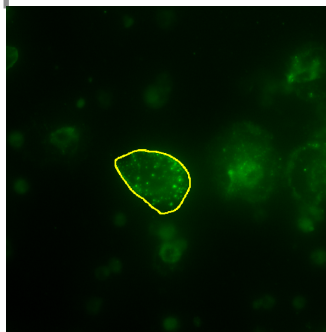

Measure fluorescence  
intensity and size
