# Supplementary material for: Constitutive activation of cellular immunity underlies the evolution of resistance to infection in Drosophila
Source: eLife journal article supplement (doi:10.7554/elife.59095), 2020-12-24

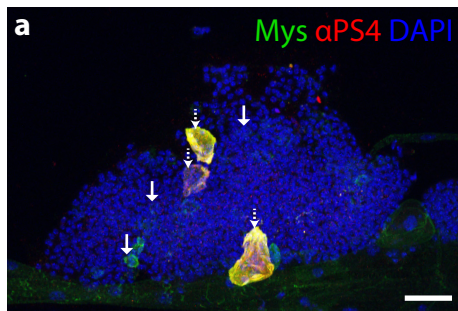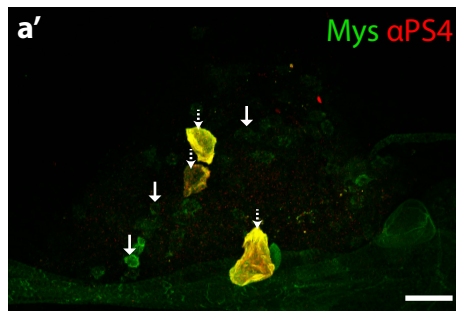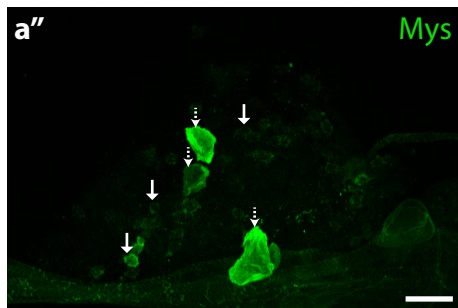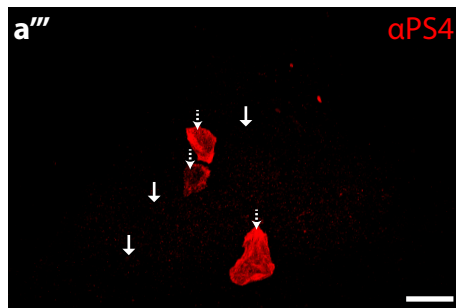

Normal

Disrupted

No Parasitism ML3

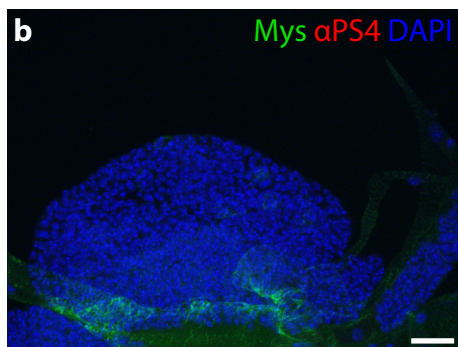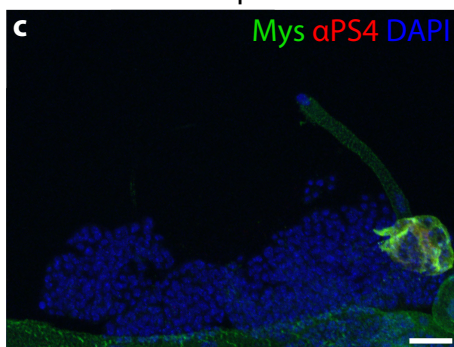

High Parasitism ML3

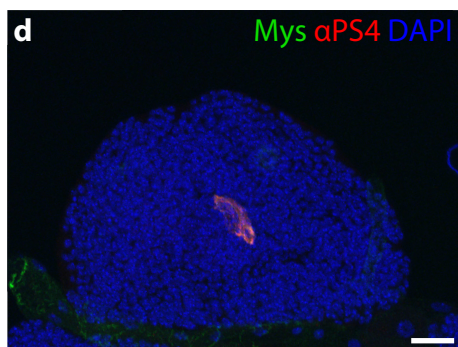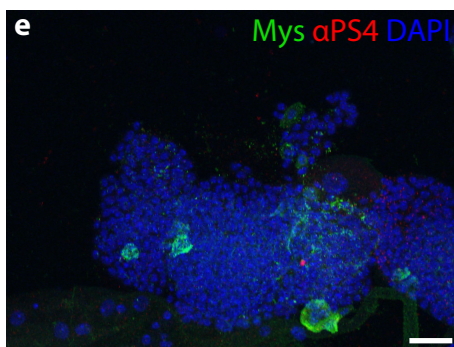

Normal

Disrupted

No Parasitism LL3

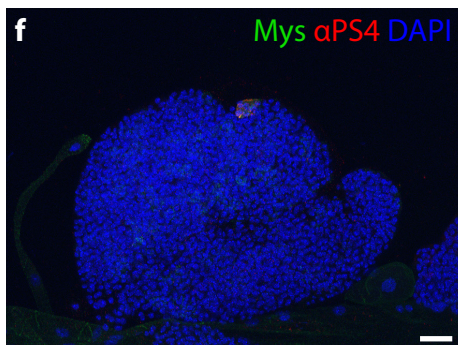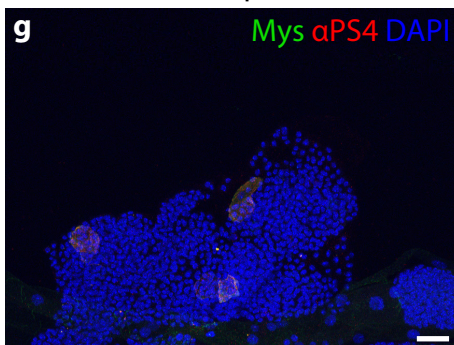

High Parasitism LL3

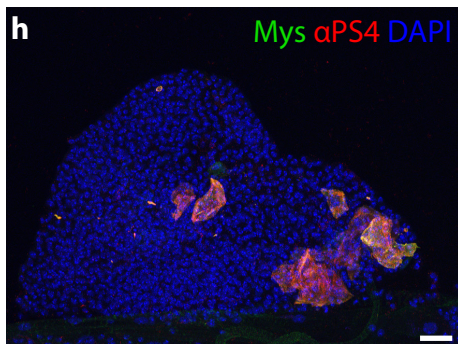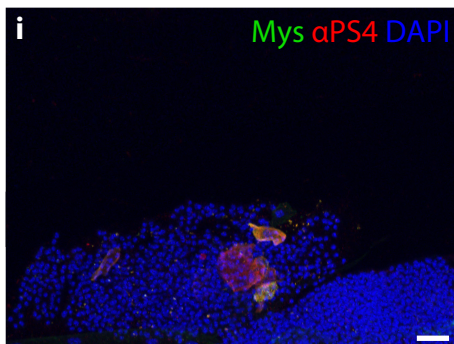

Supplement: supp [file elife-59095-supp-v1.zip]
