# Supplementary material for: Constitutive activation of cellular immunity underlies the evolution of resistance to infection in Drosophila
Source: eLife journal article supplement (doi:10.7554/elife.59095), 2020-12-24
Supplement: supp [file elife-59095-supp-v1.zip]

R: Tattikota et al. (2020), Q: Tattikota et al. (2020)

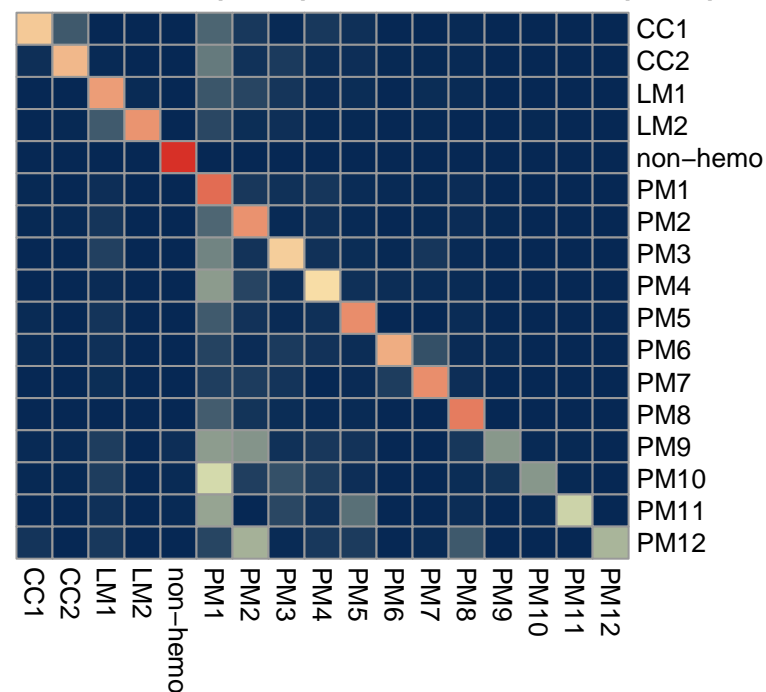

R: Tattikota et al. (2020), Q: This paper

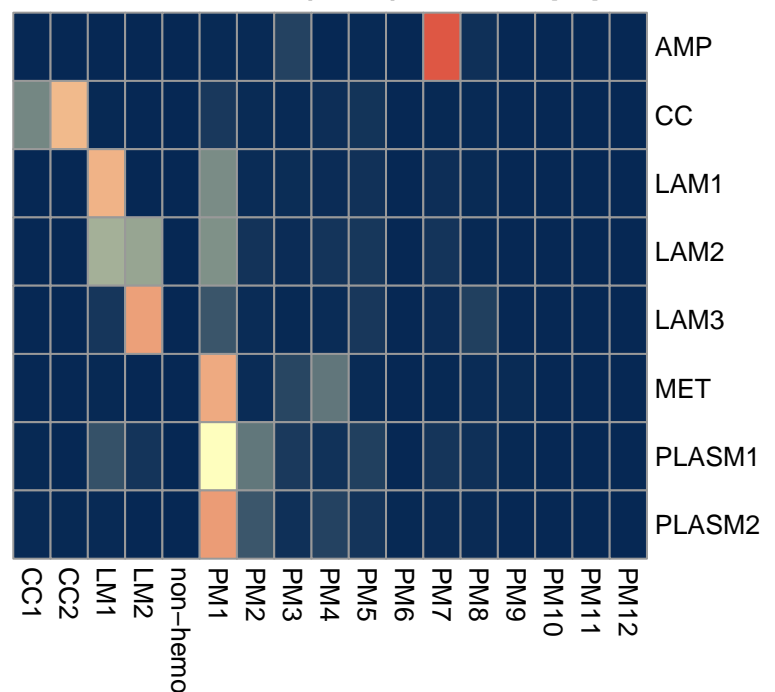

R: Tattikota et al. (2020), Q: Cattenoz et al. (2020)

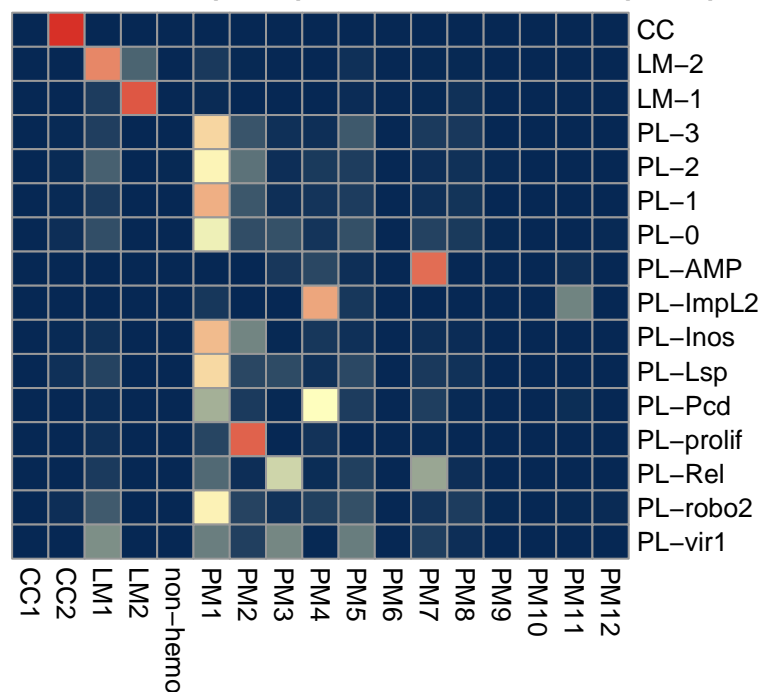

R: This paper, Q: Tattikota et al. (2020)

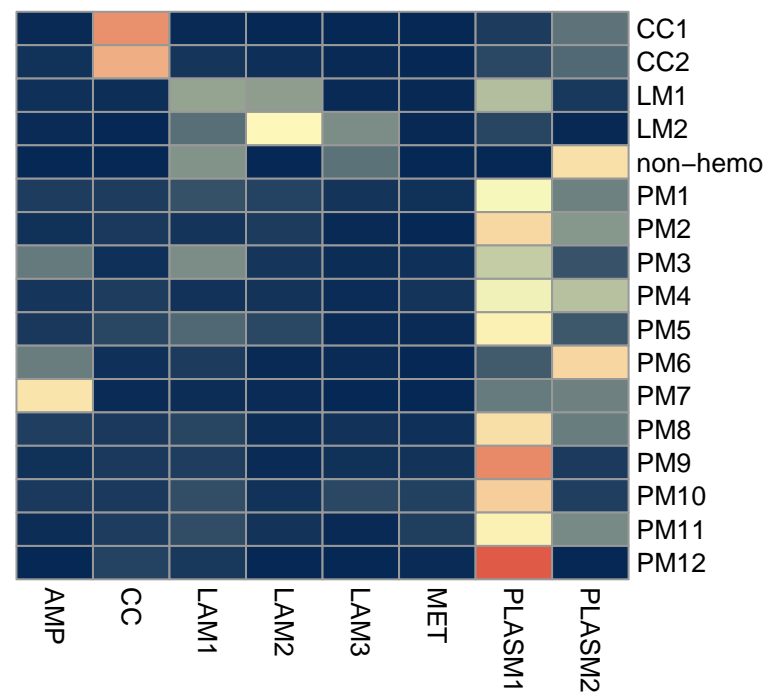

R: This paper, Q: This paper

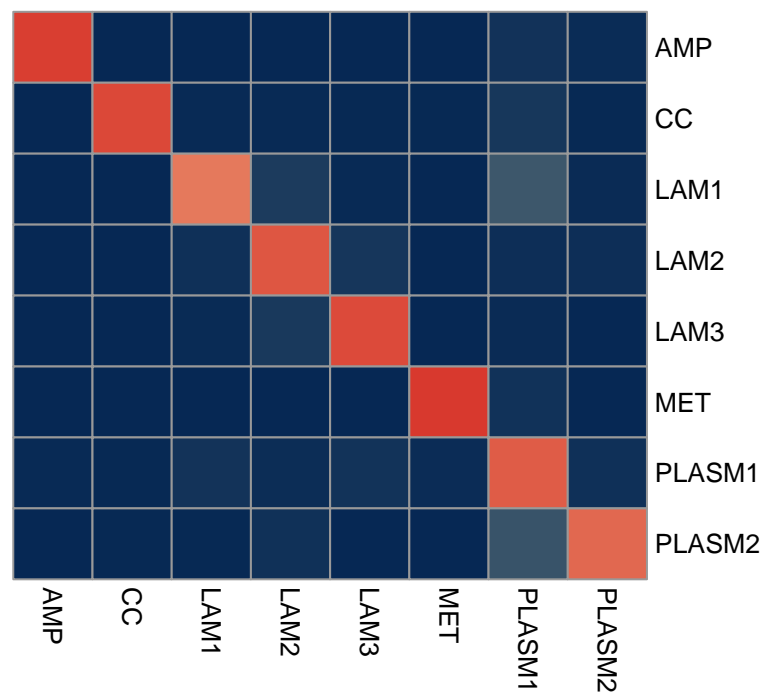

R: This paper, Q: Cattenoz et al. (2020)

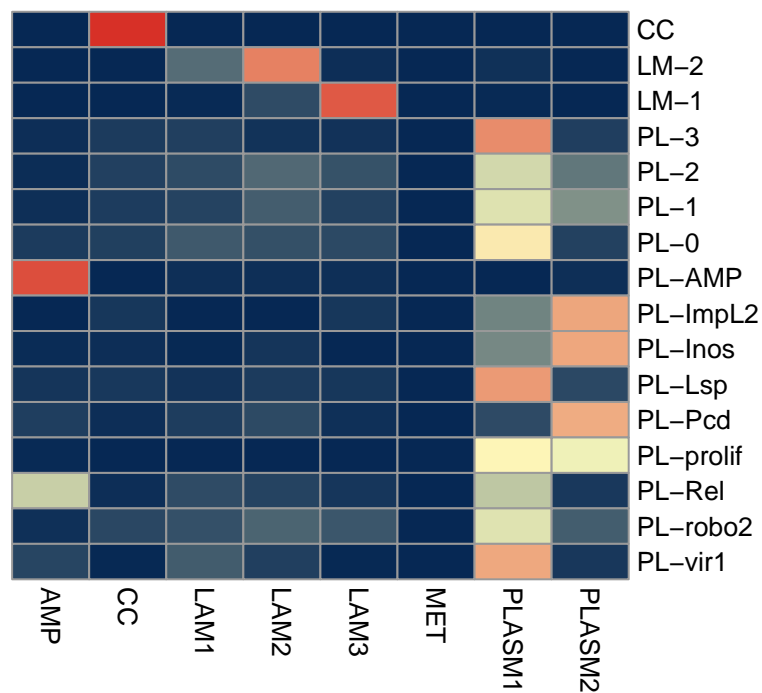

Query dataset (Q)

Proportion of Cells  
Assigned to Cluster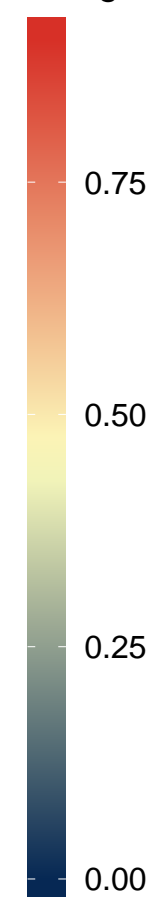

R: Cattenoz et al. (2020), Q: Tattikota et al. (2020)

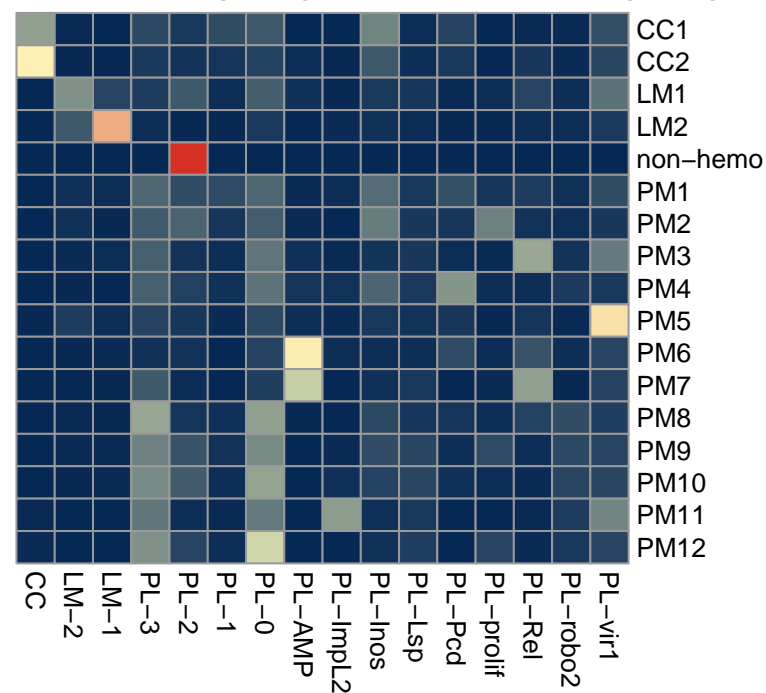

R: Cattenoz et al. (2020), Q: This paper

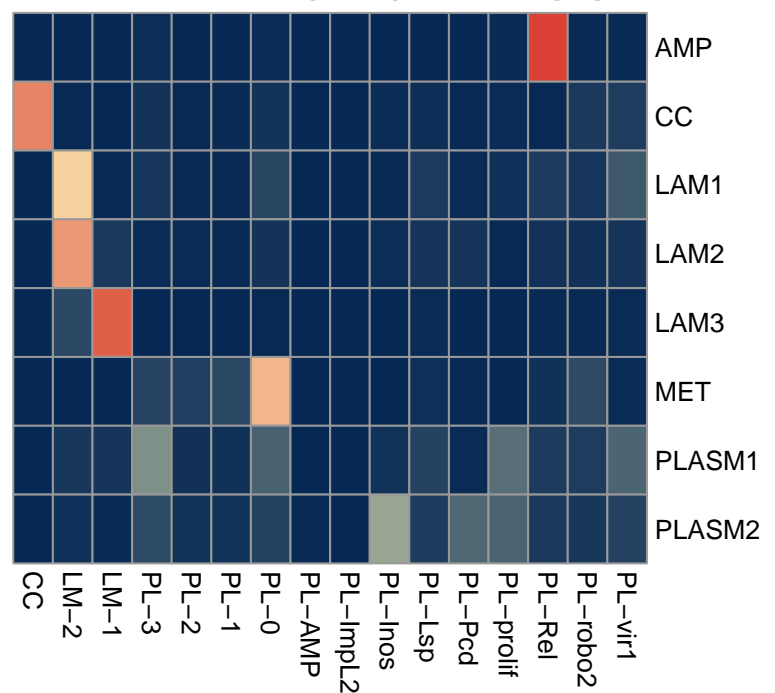

R: Cattenoz et al. (2020), Q: Cattenoz et al. (2020)

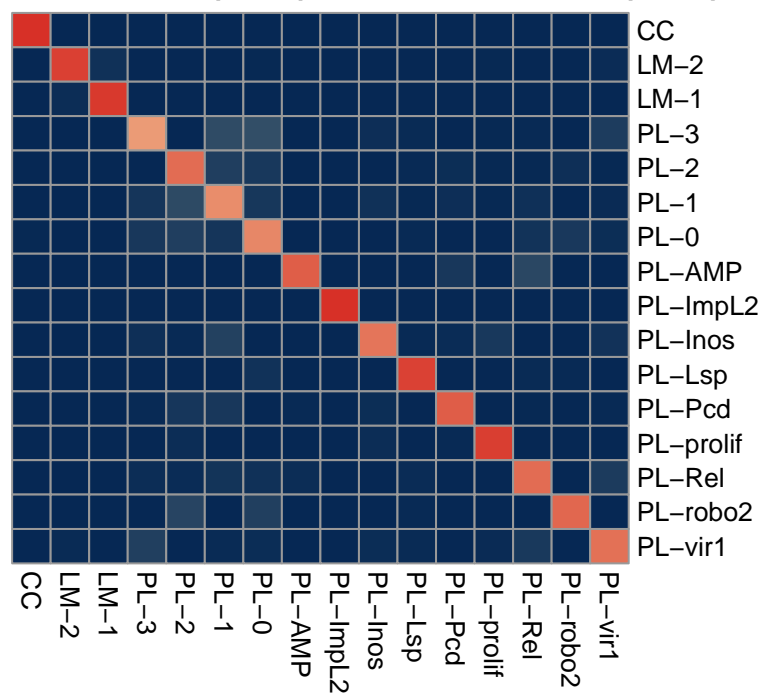

Reference dataset (R)
