# Supplementary material for: Constitutive activation of cellular immunity underlies the evolution of resistance to infection in Drosophila
Source: eLife. 2020 Dec 24;9:e59095. doi: 10.7554/eLife.59095 (PMC7785293; doi:10.7554/eLife.59095)
Supplement: Supplementary file 2. [file elife-59095-supp2.xlsx]

## Sheet: Number of genes
Cluster	Number of upregulated markers
PLASM1	172
PLASM2	42
CC	132
MET	101
AMP	137

## Sheet: GO
Cluster	Ontology	GO Term	p-Value i	Matches
PLASM1	BP	basement membrane organization [GO:0071711]	4.87433e-05	9	FBgn0000299	FBgn0002526	FBgn0011828	FBgn0016075	FBgn0026562	FBgn0033438	FBgn0035049	FBgn0261800	FBgn0267348
PLASM1	BP	extracellular matrix organization [GO:0030198]	0.000950037	10	FBgn0000299	FBgn0002526	FBgn0003137	FBgn0011828	FBgn0016075	FBgn0026562	FBgn0033438	FBgn0035049	FBgn0261800	FBgn0267348
PLASM1	BP	phagocytosis [GO:0006909]	0.04493	9	FBgn0011828	FBgn0014011	FBgn0015795	FBgn0015924	FBgn0027594	FBgn0029092	FBgn0031090	FBgn0243514	FBgn0259896
PLASM1	CC	extracellular region [GO:0005576]	1.67408e-08	46	FBgn0000279	FBgn0000299	FBgn0001114	FBgn0002526	FBgn0003137	FBgn0004449	FBgn0011722	FBgn0011828	FBgn0013770	FBgn0015221	FBgn0015222	FBgn0016059	FBgn0016075	FBgn0020414	FBgn0020415	FBgn0020416	FBgn0026562	FBgn0026721	FBgn0028542	FBgn0028990	FBgn0029093	FBgn0029167	FBgn0030521	FBgn0031327	FBgn0031973	FBgn0032638	FBgn0032889	FBgn0033438	FBgn0033725	FBgn0034724	FBgn0035049	FBgn0035076	FBgn0038299	FBgn0039759	FBgn0041180	FBgn0041710	FBgn0045823	FBgn0250848	FBgn0261363	FBgn0261800	FBgn0265048	FBgn0265140	FBgn0266569	FBgn0267348	FBgn0283461
PLASM1	CC	collagen-containing extracellular matrix [GO:0062023]	0.00025933	11	FBgn0000299	FBgn0001114	FBgn0002526	FBgn0003137	FBgn0011722	FBgn0011828	FBgn0016075	FBgn0026562	FBgn0035049	FBgn0261800	FBgn0267348
PLASM1	CC	extracellular matrix [GO:0031012]	0.000276172	15	FBgn0000299	FBgn0001114	FBgn0002526	FBgn0003137	FBgn0004449	FBgn0011722	FBgn0011828	FBgn0016075	FBgn0026562	FBgn0026721	FBgn0033438	FBgn0033725	FBgn0035049	FBgn0261800	FBgn0267348
PLASM1	CC	basement membrane [GO:0005604]	0.002373	8	FBgn0000299	FBgn0001114	FBgn0002526	FBgn0003137	FBgn0011722	FBgn0016075	FBgn0261800	FBgn0267348
PLASM1	CC	cell periphery [GO:0071944]	0.006765	50	FBgn0000017	FBgn0000083	FBgn0000256	FBgn0000723	FBgn0002526	FBgn0002921	FBgn0004449	FBgn0004456	FBgn0004657	FBgn0010246	FBgn0013718	FBgn0014011	FBgn0014163	FBgn0015795	FBgn0015872	FBgn0024238	FBgn0027594	FBgn0029147	FBgn0029506	FBgn0029507	FBgn0029932	FBgn0030796	FBgn0030955	FBgn0030993	FBgn0031090	FBgn0031220	FBgn0031261	FBgn0031307	FBgn0032731	FBgn0032946	FBgn0033438	FBgn0034408	FBgn0034880	FBgn0035076	FBgn0035767	FBgn0036007	FBgn0036770	FBgn0037386	FBgn0040752	FBgn0041087	FBgn0046687	FBgn0051092	FBgn0086347	FBgn0259735	FBgn0259896
PLASM1	CC	extracellular space [GO:0005615]	0.008248	23	FBgn0000279	FBgn0000299	FBgn0011828	FBgn0013770	FBgn0016059	FBgn0016075	FBgn0020415	FBgn0026562	FBgn0028990	FBgn0030521	FBgn0031327	FBgn0031973	FBgn0032638	FBgn0033438	FBgn0035049	FBgn0035076	FBgn0038299	FBgn0039759	FBgn0041180	FBgn0250848	FBgn0265048	FBgn0283461	FBgn0287423
PLASM2	BP	rRNA processing [GO:0006364]	0.002769	6	FBgn0003062	FBgn0011824	FBgn0026196	FBgn0029148	FBgn0034915	FBgn0259937
PLASM2	BP	rRNA metabolic process [GO:0016072]	0.002769	6	FBgn0003062	FBgn0011824	FBgn0026196	FBgn0029148	FBgn0034915	FBgn0259937
PLASM2	BP	rRNA modification [GO:0000154]	0.004039	4	FBgn0003062	FBgn0011824	FBgn0029148	FBgn0259937
PLASM2	BP	oxidative phosphorylation [GO:0006119]	0.010669	5	FBgn0013672	FBgn0013674	FBgn0013675	FBgn0013678	FBgn0260008
PLASM2	BP	ncRNA processing [GO:0034470]	0.015503	6	FBgn0003062	FBgn0011824	FBgn0026196	FBgn0029148	FBgn0034915	FBgn0259937
PLASM2	BP	ribosome biogenesis [GO:0042254]	0.020665	6	FBgn0003062	FBgn0011824	FBgn0026196	FBgn0029148	FBgn0034915	FBgn0259937
PLASM2	BP	ATP metabolic process [GO:0046034]	0.035197	6	FBgn0000064	FBgn0013672	FBgn0013674	FBgn0013675	FBgn0013678	FBgn0260008
PLASM2	BP	pseudouridine synthesis [GO:0001522]	0.043401	3	FBgn0011824	FBgn0029148	FBgn0259937
PLASM2	BP	rRNA pseudouridine synthesis [GO:0031118]	0.043401	3	FBgn0011824	FBgn0029148	FBgn0259937
PLASM2	CC	small nucleolar ribonucleoprotein complex [GO:0005732]	1.86237e-06	5	FBgn0003062	FBgn0011824	FBgn0026196	FBgn0029148	FBgn0259937
PLASM2	CC	inner mitochondrial membrane protein complex [GO:0098800]	0.000137606	6	FBgn0013672	FBgn0013674	FBgn0013678	FBgn0013679	FBgn0069923	FBgn0260008
PLASM2	CC	mitochondrial protein complex [GO:0098798]	0.000488922	6	FBgn0013672	FBgn0013674	FBgn0013678	FBgn0013679	FBgn0069923	FBgn0260008
PLASM2	CC	box H/ACA snoRNP complex [GO:0031429]	0.005874	3	FBgn0011824	FBgn0029148	FBgn0259937
PLASM2	CC	box H/ACA RNP complex [GO:0072588]	0.005874	3	FBgn0011824	FBgn0029148	FBgn0259937
PLASM2	CC	mitochondrial inner membrane [GO:0005743]	0.008599	6	FBgn0013672	FBgn0013674	FBgn0013678	FBgn0013679	FBgn0069923	FBgn0260008
PLASM2	CC	nucleolus [GO:0005730]	0.010679	6	FBgn0003062	FBgn0011824	FBgn0026196	FBgn0029148	FBgn0034915	FBgn0259937
PLASM2	CC	organelle inner membrane [GO:0019866]	0.013147	6	FBgn0013672	FBgn0013674	FBgn0013678	FBgn0013679	FBgn0069923	FBgn0260008
PLASM2	CC	mitochondrial respirasome [GO:0005746]	0.031631	4	FBgn0013674	FBgn0013678	FBgn0013679	FBgn0260008
PLASM2	CC	respirasome [GO:0070469]	0.031631	4	FBgn0013674	FBgn0013678	FBgn0013679	FBgn0260008
PLASM2	CC	respiratory chain complex [GO:0098803]	0.031631	4	FBgn0013674	FBgn0013678	FBgn0013679	FBgn0260008
PLASM2	CC	mitochondrial membrane [GO:0031966]	0.039456	6	FBgn0013672	FBgn0013674	FBgn0013678	FBgn0013679	FBgn0069923	FBgn0260008
CC	BP	chaperone-mediated protein folding [GO:0061077]	0.00691	7	FBgn0001224	FBgn0001225	FBgn0001226	FBgn0001230	FBgn0013279	FBgn0029174	FBgn0263106
CC	CC	small nucleolar ribonucleoprotein complex [GO:0005732]	0.000579463	5	FBgn0003062	FBgn0011824	FBgn0026196	FBgn0029148	FBgn0259937
CC	MF	unfolded protein binding [GO:0051082]	0.017689	7	FBgn0001224	FBgn0001225	FBgn0001226	FBgn0001230	FBgn0001233	FBgn0013279	FBgn0263106
MET	BP	carboxylic acid metabolic process [GO:0019752]	7.69789e-05	20	FBgn0000565	FBgn0001142	FBgn0014427	FBgn0017558	FBgn0022774	FBgn0025814	FBgn0027601	FBgn0029924	FBgn0030362	FBgn0030653	FBgn0031717	FBgn0032726	FBgn0033949	FBgn0036144	FBgn0036821	FBgn0037146	FBgn0040064	FBgn0051075	FBgn0086355	FBgn0286198
MET	BP	organic acid metabolic process [GO:0006082]	0.000141354	20	FBgn0000565	FBgn0001142	FBgn0014427	FBgn0017558	FBgn0022774	FBgn0025814	FBgn0027601	FBgn0029924	FBgn0030362	FBgn0030653	FBgn0031717	FBgn0032726	FBgn0033949	FBgn0036144	FBgn0036821	FBgn0037146	FBgn0040064	FBgn0051075	FBgn0086355	FBgn0286198
MET	BP	oxoacid metabolic process [GO:0043436]	0.000141354	20	FBgn0000565	FBgn0001142	FBgn0014427	FBgn0017558	FBgn0022774	FBgn0025814	FBgn0027601	FBgn0029924	FBgn0030362	FBgn0030653	FBgn0031717	FBgn0032726	FBgn0033949	FBgn0036144	FBgn0036821	FBgn0037146	FBgn0040064	FBgn0051075	FBgn0086355	FBgn0286198
AMP	BP	immune response [GO:0006955]	1.35439e-05	22	FBgn0000250	FBgn0000276	FBgn0000277	FBgn0000278	FBgn0000279	FBgn0010388	FBgn0014011	FBgn0014018	FBgn0014865	FBgn0028984	FBgn0030310	FBgn0031547	FBgn0033212	FBgn0033367	FBgn0033388	FBgn0035977	FBgn0037906	FBgn0041180	FBgn0041182	FBgn0041183	FBgn0266569	FBgn0283461
AMP	BP	antimicrobial humoral response [GO:0019730]	1.79495e-05	13	FBgn0000250	FBgn0000276	FBgn0000277	FBgn0000278	FBgn0000279	FBgn0010388	FBgn0014018	FBgn0014865	FBgn0030310	FBgn0033388	FBgn0035977	FBgn0037906	FBgn0283461
AMP	BP	humoral immune response [GO:0006959]	5.36934e-05	14	FBgn0000250	FBgn0000276	FBgn0000277	FBgn0000278	FBgn0000279	FBgn0010388	FBgn0014018	FBgn0014865	FBgn0030310	FBgn0033388	FBgn0035977	FBgn0037906	FBgn0266569	FBgn0283461
AMP	BP	defense response [GO:0006952]	6.41557e-05	25	FBgn0000250	FBgn0000276	FBgn0000277	FBgn0000278	FBgn0000279	FBgn0010388	FBgn0014011	FBgn0014018	FBgn0014865	FBgn0020278	FBgn0027594	FBgn0028984	FBgn0030310	FBgn0033367	FBgn0033388	FBgn0034638	FBgn0034647	FBgn0035977	FBgn0037906	FBgn0041180	FBgn0041182	FBgn0041183	FBgn0043841	FBgn0266569	FBgn0283461
AMP	BP	antibacterial humoral response [GO:0019731]	8.3342e-05	8	FBgn0000276	FBgn0000277	FBgn0000278	FBgn0000279	FBgn0010388	FBgn0014865	FBgn0035977	FBgn0283461
AMP	BP	response to biotic stimulus [GO:0009607]	0.000138203	26	FBgn0000250	FBgn0000276	FBgn0000277	FBgn0000278	FBgn0000279	FBgn0010388	FBgn0014011	FBgn0014018	FBgn0014865	FBgn0015222	FBgn0020278	FBgn0027594	FBgn0028984	FBgn0030310	FBgn0033367	FBgn0033388	FBgn0034647	FBgn0035977	FBgn0037906	FBgn0038299	FBgn0041180	FBgn0041182	FBgn0041183	FBgn0043841	FBgn0266569	FBgn0283461
AMP	BP	response to external biotic stimulus [GO:0043207]	0.000138203	26	FBgn0000250	FBgn0000276	FBgn0000277	FBgn0000278	FBgn0000279	FBgn0010388	FBgn0014011	FBgn0014018	FBgn0014865	FBgn0015222	FBgn0020278	FBgn0027594	FBgn0028984	FBgn0030310	FBgn0033367	FBgn0033388	FBgn0034647	FBgn0035977	FBgn0037906	FBgn0038299	FBgn0041180	FBgn0041182	FBgn0041183	FBgn0043841	FBgn0266569	FBgn0283461
AMP	BP	response to other organism [GO:0051707]	0.000138203	26	FBgn0000250	FBgn0000276	FBgn0000277	FBgn0000278	FBgn0000279	FBgn0010388	FBgn0014011	FBgn0014018	FBgn0014865	FBgn0015222	FBgn0020278	FBgn0027594	FBgn0028984	FBgn0030310	FBgn0033367	FBgn0033388	FBgn0034647	FBgn0035977	FBgn0037906	FBgn0038299	FBgn0041180	FBgn0041182	FBgn0041183	FBgn0043841	FBgn0266569	FBgn0283461
AMP	BP	defense response to other organism [GO:0098542]	0.000143597	24	FBgn0000250	FBgn0000276	FBgn0000277	FBgn0000278	FBgn0000279	FBgn0010388	FBgn0014011	FBgn0014018	FBgn0014865	FBgn0020278	FBgn0027594	FBgn0028984	FBgn0030310	FBgn0033367	FBgn0033388	FBgn0034647	FBgn0035977	FBgn0037906	FBgn0041180	FBgn0041182	FBgn0041183	FBgn0043841	FBgn0266569	FBgn0283461
AMP	BP	immune system process [GO:0002376]	0.000174098	25	FBgn0000250	FBgn0000261	FBgn0000276	FBgn0000277	FBgn0000278	FBgn0000279	FBgn0004657	FBgn0010388	FBgn0014011	FBgn0014018	FBgn0014865	FBgn0028984	FBgn0030310	FBgn0031547	FBgn0033212	FBgn0033367	FBgn0033388	FBgn0035977	FBgn0037906	FBgn0041180	FBgn0041182	FBgn0041183	FBgn0043841	FBgn0266569	FBgn0283461
AMP	BP	defense response to bacterium [GO:0042742]	0.001896	17	FBgn0000276	FBgn0000277	FBgn0000278	FBgn0000279	FBgn0010388	FBgn0014011	FBgn0014018	FBgn0014865	FBgn0027594	FBgn0030310	FBgn0033367	FBgn0033388	FBgn0034647	FBgn0035977	FBgn0037906	FBgn0041182	FBgn0283461
AMP	BP	defense response to Gram-positive bacterium [GO:0050830]	0.006832	9	FBgn0000276	FBgn0000277	FBgn0000278	FBgn0000279	FBgn0010388	FBgn0014865	FBgn0030310	FBgn0033367	FBgn0037906
AMP	BP	response to stress [GO:0006950]	0.014666	39	FBgn0000250	FBgn0000261	FBgn0000276	FBgn0000277	FBgn0000278	FBgn0000279	FBgn0010388	FBgn0010909	FBgn0013733	FBgn0013763	FBgn0014011	FBgn0014018	FBgn0014865	FBgn0020238	FBgn0020278	FBgn0020414	FBgn0027594	FBgn0028984	FBgn0030310	FBgn0032147	FBgn0033367	FBgn0033388	FBgn0034335	FBgn0034638	FBgn0034647	FBgn0035049	FBgn0035432	FBgn0035977	FBgn0037906	FBgn0038299	FBgn0038465	FBgn0039714	FBgn0041180	FBgn0041182	FBgn0041183	FBgn0043841	FBgn0044047	FBgn0266569	FBgn0283461
AMP	BP	response to bacterium [GO:0009617]	0.015055	17	FBgn0000276	FBgn0000277	FBgn0000278	FBgn0000279	FBgn0010388	FBgn0014011	FBgn0014018	FBgn0014865	FBgn0027594	FBgn0030310	FBgn0033367	FBgn0033388	FBgn0034647	FBgn0035977	FBgn0037906	FBgn0041182	FBgn0283461
AMP	BP	response to stimulus [GO:0050896]	0.021943	65	FBgn0000250	FBgn0000253	FBgn0000261	FBgn0000276	FBgn0000277	FBgn0000278	FBgn0000279	FBgn0000636	FBgn0001105	FBgn0003557	FBgn0003888	FBgn0004574	FBgn0004657	FBgn0010388	FBgn0010909	FBgn0011672	FBgn0012034	FBgn0013272	FBgn0013733	FBgn0013763	FBgn0014011	FBgn0014018	FBgn0014865	FBgn0014906	FBgn0015222	FBgn0015372	FBgn0015795	FBgn0020238	FBgn0020278	FBgn0020414	FBgn0027594	FBgn0028671	FBgn0028984	FBgn0030310	FBgn0031547	FBgn0032147	FBgn0033212	FBgn0033367	FBgn0033388	FBgn0034335	FBgn0034638	FBgn0034647	FBgn0035049	FBgn0035432	FBgn0035499
AMP	CC	extracellular space [GO:0005615]	0.010843	20	FBgn0000276	FBgn0000277	FBgn0000278	FBgn0000279	FBgn0004629	FBgn0013763	FBgn0028984	FBgn0030521	FBgn0031327	FBgn0031470	FBgn0033367	FBgn0034638	FBgn0035049	FBgn0038299	FBgn0038595	FBgn0041180	FBgn0041182	FBgn0041183	FBgn0044047	FBgn0283461
AMP	CC	extracellular region [GO:0005576]	0.015696	30	FBgn0000276	FBgn0000277	FBgn0000278	FBgn0000279	FBgn0004629	FBgn0010388	FBgn0013763	FBgn0014865	FBgn0015222	FBgn0020238	FBgn0020414	FBgn0028984	FBgn0030310	FBgn0030521	FBgn0031327	FBgn0031470	FBgn0033367	FBgn0034638	FBgn0035049	FBgn0037906	FBgn0038250	FBgn0038299	FBgn0038595	FBgn0041180	FBgn0041182	FBgn0041183	FBgn0041710	FBgn0044047	FBgn0266569	FBgn0283461
AMP	MF	enzyme inhibitor activity [GO:0004857]	0.005363	10	FBgn0004629	FBgn0028984	FBgn0032297	FBgn0034443	FBgn0038243	FBgn0038299	FBgn0041180	FBgn0041182	FBgn0041183
AMP	MF	endopeptidase inhibitor activity [GO:0004866]	0.005896	9	FBgn0004629	FBgn0028984	FBgn0034443	FBgn0038243	FBgn0038299	FBgn0041180	FBgn0041182	FBgn0041183	FBgn0051313
AMP	MF	endopeptidase regulator activity [GO:0061135]	0.005896	9	FBgn0004629	FBgn0028984	FBgn0034443	FBgn0038243	FBgn0038299	FBgn0041180	FBgn0041182	FBgn0041183	FBgn0051313
AMP	MF	peptidase inhibitor activity [GO:0030414]	0.009393	9	FBgn0004629	FBgn0028984	FBgn0034443	FBgn0038243	FBgn0038299	FBgn0041180	FBgn0041182	FBgn0041183	FBgn0051313	FBgn0051313
AMP	MF	peptidase regulator activity [GO:0061134]	0.014536	9	FBgn0004629	FBgn0028984	FBgn0034443	FBgn0038243	FBgn0038299	FBgn0041180	FBgn0041182	FBgn0041183	FBgn0051313
[truncated: 20 more columns]

## Sheet: Pathway
Cluster	Pathways	p-Value i	Matches
PLASM1	Extracellular matrix organization	1.48012e-06	15	FBgn0000299	FBgn0002526	FBgn0004456	FBgn0004657	FBgn0011828	FBgn0016075	FBgn0028990	FBgn0029167	FBgn0033438	FBgn0034880	FBgn0035049	FBgn0038299	FBgn0261800	FBgn0265140	FBgn0267348
PLASM1	ECM-receptor interaction	0.001266	7	FBgn0000299	FBgn0002526	FBgn0004657	FBgn0016075	FBgn0029167	FBgn0261800	FBgn0267348
PLASM1	Laminin interactions	0.006008	5	FBgn0000299	FBgn0002526	FBgn0016075	FBgn0261800	FBgn0267348
PLASM1	Degradation of the extracellular matrix	0.033538	5	FBgn0000299	FBgn0016075	FBgn0033438	FBgn0035049	FBgn0265140
PLASM1	Integrin cell surface interactions	0.033551	6	FBgn0000299	FBgn0004456	FBgn0004657	FBgn0016075	FBgn0029167	FBgn0034880
PLASM2	Ribosome biogenesis in eukaryotes	1.42199e-06	6	FBgn0003062	FBgn0011824	FBgn0026196	FBgn0029148	FBgn0034915	FBgn0259937
AMP	Innate Immune System	1.02191e-06	31	FBgn0000250	FBgn0000253	FBgn0000261	FBgn0001941	FBgn0003888	FBgn0004657	FBgn0011672	FBgn0013733	FBgn0013763	FBgn0014011	FBgn0014018	FBgn0015795	FBgn0020414	FBgn0028663	FBgn0028671	FBgn0028984	FBgn0030310	FBgn0030521	FBgn0030955	FBgn0030993	FBgn0035049	FBgn0035715	FBgn0035977	FBgn0037906	FBgn0038299	FBgn0040285	FBgn0061198	FBgn0085484	FBgn0086558	FBgn0261461	FBgn0285910
AMP	Immune System	2.46892e-06	35	FBgn0000250	FBgn0000253	FBgn0000261	FBgn0001941	FBgn0003557	FBgn0003888	FBgn0004574	FBgn0004657	FBgn0011672	FBgn0013733	FBgn0013763	FBgn0014011	FBgn0014018	FBgn0015795	FBgn0020414	FBgn0028663	FBgn0028671	FBgn0028984	FBgn0030310	FBgn0030521	FBgn0030955	FBgn0030993	FBgn0035049	FBgn0035715	FBgn0035977	FBgn0037906	FBgn0038299	FBgn0040285	FBgn0061198	FBgn0085484	FBgn0086558	FBgn0259228	FBgn0260442	FBgn0261461	FBgn0285910
AMP	Neutrophil degranulation	0.000140644	24	FBgn0000253	FBgn0000261	FBgn0001941	FBgn0003888	FBgn0004657	FBgn0011672	FBgn0013733	FBgn0013763	FBgn0014011	FBgn0014018	FBgn0015795	FBgn0020414	FBgn0028671	FBgn0028984	FBgn0030521	FBgn0030955	FBgn0030993	FBgn0035049	FBgn0035715	FBgn0035977	FBgn0038299	FBgn0040285	FBgn0085484	FBgn0261461
AMP	Iron uptake and transport	0.003472	6	FBgn0011672	FBgn0028663	FBgn0028671	FBgn0033388	FBgn0086558	FBgn0285910
