# Supplementary material for: Constitutive activation of cellular immunity underlies the evolution of resistance to infection in Drosophila
Source: eLife. 2020 Dec 24;9:e59095. doi: 10.7554/eLife.59095 (PMC7785293; doi:10.7554/eLife.59095)
Supplement: Supplementary file 5. [file elife-59095-supp5.csv]

Gene	importance	pvalue	symbol	PLASM1 (Mean UMI)	LAM1 (Mean UMI)	LAM2 (Mean UMI)	LAM3 (Mean UMI)
FBgn0013733	90215.41419	0.00990099	shot	5.204262693	9.463151808	23.73343485	57.20748269
FBgn0003888	84077.96579	0.00990099	betaTub60D	15.90927263	28.12186119	85.25536003	139.6702205
FBgn0003886	78351.60278	0.00990099	alphaTub85E	27.78405002	53.87563239	101.1579913	181.4993768
FBgn0000253	74546.976	0.00990099	Cam	37.21917608	87.08002851	114.4892184	117.8749162
FBgn0034005	71919.46419	0.00990099	ItgaPS4	1.838854752	4.207290599	9.59783927	20.00622561
FBgn0032422	71686.15036	0.00990099	atilla	9.445697682	23.4886823	50.07331733	76.21476937
FBgn0030040	68837.97215	0.00990099	CG15347	9.998925918	14.59322781	51.06176242	79.11497971
FBgn0029167	66803.30944	0.00990099	Hml	33.32036416	10.9196235	4.582403188	2.510716388
FBgn0037386	61216.47089	0.00990099	CG1208	11.60166773	13.04243668	31.99410695	82.86226872
FBgn0038682	57750.13735	0.00990099	CG5835	1.980674838	2.163798357	13.03413907	24.028268
FBgn0035498	56202.19607	0.00990099	Fit1	5.039406049	12.3326954	18.39162858	36.19866125
FBgn0000042	55324.2649	0.00990099	Act5C	100.3814436	183.3627508	239.6358835	274.6775631
FBgn0001114	53878.08904	0.00990099	Glt	16.19217069	4.545655429	1.569969449	1.247814417
FBgn0011828	53116.14258	0.00990099	Pxn	15.38806531	4.203667519	1.881254683	1.260256165
FBgn0000299	47259.17555	0.00990099	Col4a1	15.68237022	3.783140024	1.882478345	1.120914236
FBgn0026562	46808.58691	0.00990099	SPARC	19.78740793	6.388495521	2.610940372	1.64374111
FBgn0030396	46639.57306	0.00990099	CG2556	1.267113928	2.429335082	11.40426538	16.96498209
FBgn0264895	45826.35501	0.00990099	RapGAP1	4.383843235	8.883008417	17.19806403	29.69860107
FBgn0014141	42915.64605	0.00990099	cher	8.438435892	17.08112405	28.08209512	39.01529378
FBgn0010424	42894.27076	0.00990099	TpnC73F	0.489014745	0.337555538	0.594911964	10.65671448
FBgn0015872	42580.03557	0.00990099	Drip	1.367025518	1.865913042	7.943648079	16.96545189
FBgn0032897	41875.88341	0.00990099	CG9336	0.68561581	0.665350403	1.003068239	11.55754093
FBgn0029147	40538.45681	0.00990099	NtR	9.671715349	4.057870225	1.211217104	0.861916633
FBgn0260442	39771.78153	0.00990099	rhea	7.521635962	18.37700543	23.95757633	34.79146563
FBgn0033504	37512.2728	0.00990099	CAP	0.623403878	0.558921344	3.128302862	7.653234299
FBgn0266253	37171.19159	0.00990099	lncRNA:CR44948	3.890162349	5.640614923	13.2508951	33.65502903
FBgn0261260	37003.98896	0.00990099	mgl	0.2127431	0.459084861	0.433293227	3.706818017
FBgn0033724	36521.46314	0.00990099	CG8501	34.98675495	27.23037032	4.474157539	5.200839742
FBgn0004636	36087.51715	0.00990099	Rap1	8.179467868	16.83333672	23.22362309	41.16224674
FBgn0003137	35640.30512	0.00990099	Ppn	30.27252978	17.07880517	6.727130155	2.911711479
FBgn0029932	35403.74451	0.00990099	CG4607	0.586675499	0.635675459	0.992968732	9.02637989
FBgn0003218	34424.50395	0.00990099	rdgB	0.693850722	2.486884166	3.980153935	7.259137667
FBgn0032886	33578.74317	0.00990099	CG9328	2.130420388	1.857653083	7.44705785	21.27509557
FBgn0037477	32675.32382	0.00990099	CG14610	2.051190673	6.124275978	13.33610146	18.43125884
FBgn0085359	31686.2957	0.00990099	CG34330	0.948288792	0.802849288	1.908137868	10.75080271
FBgn0026084	30926.30019	0.00990099	cib	20.21050996	25.5614372	28.11955067	70.91318703
FBgn0031080	30203.12335	0.00990099	CG12655	0.425828654	0.568035712	1.329457591	4.908123325
FBgn0040296	29929.94227	0.00990099	Ocho	0.258568541	0.223441494	0.549943548	4.440427449
FBgn0038679	29779.64562	0.00990099	CG6040	0.216234188	0.38987073	0.660011915	2.817846158
FBgn0039747	29620.09526	0.00990099	AdoR	0.23071768	0.234511266	0.651964117	2.869237697
FBgn0263380	29543.58025	0.00990099	lncRNA:CR43432	2.013305843	1.859341598	4.96141522	18.02413323
FBgn0040813	27810.14707	0.00990099	Nplp2	94.24827729	39.79197361	22.41397863	11.87838055
FBgn0261800	27390.84458	0.00990099	LanB1	7.874087631	2.663688961	0.978504847	0.581946023
FBgn0051363	27245.81673	0.00990099	Jupiter	11.02604801	19.95243801	19.22984144	51.36105835
FBgn0032010	27118.89041	0.00990099	CG8086	0.101070986	0.082644064	0.254760932	1.738766904
FBgn0036742	25052.17693	0.00990099	CG7497	0.466032895	0.728364744	2.1337365	4.890824587
FBgn0004657	23941.48646	0.00990099	mys	6.27503026	20.22414144	20.10702695	27.65462281
FBgn0027066	23730.6667	0.00990099	Eb1	6.805093724	10.80084996	14.93020121	29.75402766
FBgn0001987	22825.5026	0.00990099	Gli	0.302362388	0.631587669	0.793707095	3.933456313
FBgn0031791	21344.89524	0.00990099	AANATL2	0.214622368	0.215150526	0.223975496	3.661210518
FBgn0026602	21312.3815	0.00990099	Ady43A	0.54920926	1.031908345	1.63878883	4.84964153
FBgn0261561	21241.88068	0.00990099	CG42675	1.071391834	1.633520259	4.30281309	9.752807811
FBgn0034219	20898.20037	0.00990099	mthl4	2.228426788	6.327607951	10.70510615	14.35718889
FBgn0034720	20445.58553	0.00990099	Liprin-gamma	0.109708563	0.387074974	0.360091502	2.164006534
FBgn0261261	20288.71076	0.00990099	plx	0.336782679	0.312894618	1.572667448	3.725269168
FBgn0030796	20270.48771	0.00990099	CG4829	3.883070454	3.876654866	0.492054562	0.173435581
FBgn0035076	19267.29881	0.00990099	Ance-5	4.172864419	0.668225118	0.304879279	0.228219268
FBgn0026721	18361.04507	0.00990099	fat-spondin	5.105901823	1.35974736	0.408129696	0.404738858
FBgn0085282	18113.34065	0.00990099	CG34253	0.234129855	0.208034656	0.193658361	1.163025349
FBgn0051337	17864.55915	0.00990099	CG31337	5.101541443	1.923048898	0.61319058	0.433686793
FBgn0033448	17402.84106	0.00990099	hebe	0.812806554	2.7203331	6.70425519	5.144147074
FBgn0032857	17163.41213	0.00990099	CG10947	0.169154266	0.171098867	0.611718826	2.527412434
FBgn0041087	16538.28667	0.00990099	wun2	2.178428403	6.239435646	10.67960918	16.00975052
FBgn0053225	16024.68962	0.00990099	CG33225	7.849267056	22.89129144	18.65848716	45.63503897
FBgn0085354	15960.22472	0.00990099	CG34325	0.14147336	0.139477051	0.29602053	1.806701013
FBgn0013763	15602.25411	0.00990099	Idgf6	10.35653722	4.322811307	2.106311574	1.301802844
FBgn0051729	15213.2198	0.00990099	CG31729	1.110963563	1.872197526	4.319004165	8.86585859
FBgn0261628	14885.08265	0.00990099	CG42711	3.086155337	1.801978302	0.268692568	0.185475657
FBgn0000043	14664.9442	0.00990099	Act42A	53.43770482	103.7829009	102.121723	95.01736528
FBgn0002526	14576.21227	0.00990099	LanA	4.806998556	2.45469296	0.700927199	0.340708183
FBgn0031261	14477.40085	0.00990099	nAChRbeta3	7.445334208	3.298352844	0.997364177	0.60039717
FBgn0050035	14287.59671	0.00990099	Tret1-1	1.041160983	1.166966862	8.174323816	7.949150767
FBgn0259896	13451.99937	0.00990099	NimC1	6.789115481	3.527742361	0.466351724	0.626313032
FBgn0263258	13265.87195	0.00990099	chas	0.038681186	0.026035916	0.025805026	0.205981208
FBgn0020251	13219.60591	0.00990099	sfl	0.259563028	0.260868325	0.384839451	2.442192318
FBgn0031307	13086.37415	0.00990099	MFS3	0.803195087	0.608758488	0.622622445	5.217241961
FBgn0262563	13032.46691	0.00990099	CG43103	0.136205199	0.090737033	0.236579838	1.534413293
FBgn0033949	12912.00402	0.00990099	Had2	4.996623448	1.728150873	0.538942369	0.32984348
FBgn0028916	12867.62994	0.00990099	CG33090	0.382384883	0.639256851	0.80648652	4.305853499
FBgn0261363	12684.1514	0.00990099	PPO3	3.064996751	8.507294069	16.38371948	20.54275734
FBgn0015229	12516.34283	0.00990099	glec	0.46883899	0.626143645	0.882094753	4.367591796
FBgn0085261	12196.90645	0.00990099	CG34232	0.63276452	0.151486924	0.053685997	0.052125323
FBgn0034761	12085.40513	0.00990099	CG4250	12.54514296	8.777785276	2.438863268	1.786314893
FBgn0034638	12070.8941	0.00990099	CG10433	0.169776808	0.201668731	0.20402092	1.934238151
FBgn0260768	11972.479	0.00990099	CG42566	1.396264998	0.747577173	0.254519183	0.148458129
FBgn0035708	11351.76996	0.00990099	axed	1.088195969	2.71395384	4.327599182	8.318433292
FBgn0037720	11226.5543	0.00990099	CG8312	0.495979131	0.886723571	2.421094736	3.366367828
FBgn0022709	11092.69666	0.00990099	Adk1	0.375075064	0.550520618	1.684557366	3.369130533
FBgn0035587	10758.59907	0.00990099	Gdap1	0.130807776	0.176225561	0.11703953	1.736572294
FBgn0259977	10712.58302	0.00990099	Tdc1	0.197147699	0.536368877	1.477300437	2.273408054
FBgn0016672	10619.78092	0.00990099	Ipp	0.655072777	0.944366728	1.095722696	5.065178757
FBgn0010397	10539.29165	0.00990099	LamC	2.685691981	7.302253044	10.1629122	12.15554875
FBgn0042135	10306.22253	0.00990099	Gdap2	0.519681328	0.7001957	1.609612877	4.740527122
FBgn0038088	10015.79694	0.00990099	CG10126	0.872542757	2.297330794	1.428625097	6.52017111
FBgn0031150	9971.971413	0.00990099	bves	0.31352862	0.584583182	0.881030671	3.050231076
FBgn0265413	9795.689102	0.00990099	CG44325	3.239556943	6.089937989	2.918225029	15.24555684
FBgn0052412	9752.989095	0.00990099	QC	0.500548556	0.94325517	3.176520406	3.414074249
FBgn0036778	9632.602945	0.00990099	Cyp312a1	0.03127466	0.013130728	0.060243975	0.566685619
FBgn0265375	9579.841523	0.00990099	lncRNA:CR44316	2.047251166	11.44495285	14.98628464	4.395458008
FBgn0053056	9551.766251	0.00990099	CG33056	0.750725313	1.640006648	2.364154775	5.895021903
FBgn0035539	9523.584987	0.00990099	slow	0.276207867	1.23521363	1.732482775	1.867060223
FBgn0029507	9479.703162	0.00990099	Tsp42Ed	1.338451273	1.415068825	0.949072684	6.643093668
FBgn0030976	9339.244953	0.00990099	CG7378	0.021144622	0.019701159	0.062527007	0.491584207
FBgn0033446	9282.164998	0.00990099	CG1648	2.305175591	6.658639406	12.62382742	6.948390563
FBgn0267910	9206.571292	0.00990099	lncRNA:CR34335	249.4047481	218.3979532	168.5204905	354.9987985
FBgn0265191	9157.318136	0.00990099	Gyg	0.154716391	0.12961898	0.263277173	1.705889922
FBgn0003884	9151.707011	0.00990099	alphaTub84B	26.64951535	38.29950301	52.44317328	55.15653544
FBgn0036364	9060.970682	0.00990099	CG14109	0.008473595	0.030434604	0.014312419	0.195752202
FBgn0263212	9035.089355	0.00990099	CR43382	0.005851203	0.018520948	0.033158771	0.235812674
FBgn0001092	8607.688567	0.00990099	Gapdh2	2.270088336	3.216088025	4.99771471	16.86941186
FBgn0015589	8494.822614	0.00990099	Apc	0.711511492	0.802611769	1.851271361	5.766307355
FBgn0029903	8212.48487	0.00990099	pod1	2.474965484	4.59442602	6.076807844	12.45662485
FBgn0262881	8112.098909	0.00990099	CG43236	6.504635944	3.094752158	0.714001973	0.667632597
FBgn0040752	8060.28173	0.00990099	Prosap	4.333212753	3.392460731	0.596559169	0.309033227
FBgn0283712	8054.282134	0.00990099	LIMK1	0.226366576	0.272370299	0.82452761	2.294917058
FBgn0040942	8029.077702	0.00990099	CG12643	0.436359265	0.14156194	0.049051523	0.048626617
FBgn0243514	8025.242098	0.00990099	eater	2.963688918	1.251889304	0.286060984	0.223831765
FBgn0050460	7613.420244	0.00990099	CG30460	0.085391267	0.20301803	0.124962903	1.396740735
FBgn0016122	7186.649767	0.00990099	Acer	0.37116443	0.083900654	0.030859014	0.017677686
FBgn0038206	7158.286301	0.00990099	twf	1.498744479	2.629853103	6.95327902	7.529741529
FBgn0039612	6894.825164	0.00990099	Nepl19	0.979376274	0.163246193	0.104956177	0.060766334
FBgn0259715	6829.082999	0.00990099	CG42369	0.789549055	0.229760225	0.073921882	0.068277162
FBgn0045823	6746.100779	0.00990099	vsg	13.88875831	8.412046932	3.304731493	3.421823667
FBgn0026374	6462.875941	0.00990099	Rhp	0.585192555	1.351996617	2.916454254	3.761400925
FBgn0029896	6453.350261	0.00990099	CG3168	0.072974144	0.098850489	0.033600426	0.972802064
FBgn0036877	6385.087932	0.00990099	CG9452	0.05899567	0.03180462	0.210980171	1.301053501
FBgn0001258	6225.017859	0.00990099	Ldh	0.215478392	0.149731524	0.572531867	3.118794411
FBgn0030412	6052.51353	0.00990099	Tomosyn	0.433672502	0.682518535	0.830731186	3.670259735
FBgn0024150	6022.297112	0.00990099	Ac78C	0.681937218	1.92792846	2.789269505	3.873420538
FBgn0000256	5884.372152	0.00990099	capu	1.358730103	2.387606494	4.732014005	7.705650543
FBgn0032318	5814.323211	0.00990099	CG14072	0.415828791	0.360023095	0.517208098	6.388778344
FBgn0027657	5795.552013	0.00990099	glob1	0.866424962	0.787436809	1.387259518	5.893367771
FBgn0262565	5784.474506	0.00990099	CR43105	0.298936243	0.606381167	0.439066136	1.605150767
FBgn0052311	5708.343519	0.00990099	zormin	0.025781478	0.031653504	0.043840939	0.431855508
FBgn0027580	5291.595727	0.00990099	PCB	0.107464121	0.101063598	0.151244031	1.347818903
FBgn0259228	5271.652491	0.00990099	C3G	1.338615765	3.82844888	5.264048821	6.870604431
FBgn0010894	5212.615468	0.00990099	sinu	0.104843299	0.123245792	0.108605692	0.916755462
FBgn0259740	5105.016132	0.00990099	CG42394	6.631139035	17.86089241	7.101963802	1.221073245
FBgn0001089	5059.406374	0.00990099	Gal	1.455872728	0.337877251	0.154929279	0.142781279
FBgn0034753	4959.855898	0.00990099	CG2852	9.481291804	4.961720669	3.06761372	1.643455638
FBgn0036198	4899.498144	0.00990099	crim	0.102552319	0.164342404	0.100848743	0.680634037
FBgn0004449	4847.421994	0.00990099	Ten-m	3.417054065	2.22200931	0.385643714	0.288951487
FBgn0016075	4819.317095	0.00990099	vkg	3.776698357	0.899815337	0.502385644	0.394442366
FBgn0085452	4771.506971	0.00990099	CG34423	1.758979627	1.584798346	1.678595134	7.156977075
FBgn0003748	4578.542545	0.00990099	Treh	3.14987987	3.604900214	18.52464656	15.43390545
FBgn0014163	4555.994369	0.00990099	fax	9.960687258	6.116240849	0.967647581	4.56635774
FBgn0005771	4524.74197	0.00990099	noc	0.224234622	0.055219941	0.017413734	0.015401598
FBgn0040551	4503.91389	0.00990099	CG11686	1.339187872	2.71155827	3.809690904	6.967037042
FBgn0034443	4380.152826	0.00990099	cer	8.023801796	12.21889409	9.22541213	26.96955298
FBgn0024238	4281.836379	0.00990099	Fim	4.126086362	7.7665328	12.05953854	14.79646189
FBgn0004507	4255.518686	0.00990099	GlyP	0.074733988	0.043993061	0.049568266	0.484707079
FBgn0031914	4149.697608	0.00990099	CG5973	1.189448367	0.673538781	0.141616378	0.093874976
FBgn0259246	4084.194439	0.00990099	brp	0.008530493	0.010325291	0.003970918	0.213184941
FBgn0025628	4083.27229	0.00990099	CG4199	0.626160092	0.733199924	0.428203901	2.818336098
FBgn0035964	4043.075658	0.00990099	Dhpr	0.472178189	0.426893857	0.676132578	2.709072547
FBgn0263118	3992.61689	0.00990099	tx	0.33492677	1.136042268	2.335849187	1.755384418
FBgn0000071	3926.944672	0.00990099	Ama	0.827828471	0.39748918	0.081147547	0.07735843
FBgn0086347	3922.059156	0.00990099	Myo31DF	3.15311545	8.693200478	8.467325652	14.7549016
FBgn0265048	3917.208588	0.00990099	cv-d	2.499879081	0.948023049	0.424545963	0.195512922
FBgn0030160	3870.968012	0.00990099	CG9691	0.131330701	0.199608453	0.174029909	1.214060274
FBgn0034398	3828.330599	0.00990099	CG15098	7.61641709	4.129254128	1.502441517	1.242030427
FBgn0010395	3762.240301	0.00990099	Itgbn	0.343111761	0.975498022	1.665979189	2.540265168
FBgn0263346	3739.63883	0.00990099	smash	0.273158647	0.295102824	0.972406242	2.501907649
FBgn0039613	3671.529379	0.00990099	Nepl20	0.358702762	0.060584867	0.025053821	0.022748407
FBgn0004167	3654.214167	0.00990099	kst	3.430845609	2.039924982	0.709996677	0.31347826
FBgn0266521	3576.432642	0.00990099	stai	0.596780549	0.177940985	0.139498437	1.586170439
FBgn0027844	3502.896068	0.00990099	CAH1	0.033878994	0.028805889	0.034067471	0.447096216
FBgn0028984	3302.852623	0.00990099	Spn88Ea	0.78625592	1.686654487	1.19509095	3.986204691
FBgn0032405	3291.140965	0.00990099	firl	1.321675664	0.445734682	0.143066864	0.159282305
FBgn0020372	3254.317752	0.00990099	TM4SF	0.185809046	0.033925692	0.016070052	0.019312391
FBgn0032025	3246.311187	0.00990099	CG7778	0.040404466	0.04417424	0.151643648	0.340968999
FBgn0004397	3200.609226	0.00990099	Vinc	1.274404079	2.912706726	4.17963144	7.263314898
FBgn0028542	3139.794148	0.00990099	NimB4	4.401114386	2.308570845	0.861058155	0.529112619
FBgn0003447	3086.797759	0.00990099	sn	0.697385238	0.383643575	1.043169873	4.090049347
FBgn0040299	3017.930669	0.00990099	Myo28B1	0.205807755	0.635609013	1.513340733	1.476853984
FBgn0028956	2995.458328	0.00990099	mthl3	0.198119045	0.349639195	0.65869891	0.644732402
FBgn0030362	2930.530447	0.00990099	regucalcin	26.89188487	12.95620121	11.05902961	4.071990551
FBgn0034405	2836.254491	0.00990099	Jheh2	1.241439253	0.329068741	0.198804069	0.153302976
FBgn0020416	2825.337681	0.00990099	Idgf1	2.44659474	1.141116412	0.341441493	0.748157684
FBgn0032400	2819.152172	0.00990099	CG6770	1.424853454	2.229820976	2.422504996	9.157555488
FBgn0014011	2770.301039	0.00990099	Rac2	6.028861209	13.23019603	17.41314818	18.36586833
FBgn0019952	2752.375496	0.00990099	Orct	1.108761475	0.804567066	0.216288219	0.0829588
FBgn0267348	2685.719313	0.00990099	LanB2	4.373788261	2.166621906	0.784881717	0.45901288
FBgn0052194	2659.825878	0.00990099	lncRNA:CR32194	0.101128231	0.074594035	0.086596483	0.604227123
FBgn0028990	2659.210809	0.00990099	Spn27A	1.598165982	0.654482944	0.213812693	0.18503186
FBgn0030237	2574.197677	0.00990099	CG15209	0.125998754	0.046931836	0.010113395	0.005454849
FBgn0010225	2399.463105	0.00990099	Gel	2.820227115	1.151517413	0.431237025	0.437227417
FBgn0029093	2386.129075	0.00990099	cathD	10.3059104	6.422669237	2.612066084	1.314847863
FBgn0010905	2346.978144	0.00990099	Spn	0.508096541	0.135866365	0.045078862	0.073382233
FBgn0035497	2310.623849	0.00990099	CG14995	0.225675172	0.184168917	0.387228871	1.371349227
FBgn0259736	2269.73517	0.00990099	CG42390	0.017291825	0.026118446	0.049951789	0.352916778
FBgn0031805	2254.84486	0.00990099	Nepl4	0.796657194	0.287172422	0.075643285	0.057018211
FBgn0263077	2224.55483	0.00990099	CG43340	0.667567642	0.954433394	3.215434649	3.24846082
FBgn0086355	2204.716342	0.00990099	Tpi	0.572822864	0.554858436	1.498804206	3.95666267
FBgn0020415	2204.347948	0.00990099	Idgf2	3.556595662	2.021349002	0.652802972	1.29014219
FBgn0038890	2184.652042	0.00990099	CG7956	0.778720866	2.666215943	3.296359811	2.927100329
FBgn0053346	2171.484866	0.00990099	CG33346	0.087689567	0.055257106	0.005704277	0.004661139
FBgn0036262	2125.576076	0.00990099	CG6910	0.890888196	0.188978522	0.061322137	0.102140751
FBgn0264489	2120.013626	0.00990099	CG43897	0.039061218	0.061125422	0.041887358	0.353097455
FBgn0086254	2119.92882	0.00990099	CG6084	2.118352885	0.70160057	0.441539737	0.30817559
FBgn0085421	2107.17324	0.00990099	Epac	0.184613422	0.881682866	0.978646744	1.161488525
FBgn0034249	2086.673391	0.00990099	RhoGAP54D	0.155541345	0.018749586	0.012145246	0.003567687
FBgn0033153	2030.668796	0.00990099	Gadd45	2.07990483	0.791538804	0.234611889	0.20054206
FBgn0031213	2016.660005	0.00990099	galectin	1.100361151	1.920103663	2.179303934	5.842893657
FBgn0264087	2006.473884	0.00990099	Slob	0.048462116	0.069205891	0.091575849	0.771292021
FBgn0037750	1998.335763	0.00990099	Whamy	0.195404182	0.401543649	0.899654625	1.489074758
FBgn0031449	1960.853817	0.00990099	CG31689	0.157724501	0.063368524	0.02208715	0.01138587
FBgn0262142	1921.23675	0.00990099	lncRNA:CR42868	0.326647542	0.274648094	0.068476525	0.010113166
FBgn0053138	1855.595199	0.00990099	AGBE	0.07321427	0.049709804	0.023718275	0.209525318
FBgn0085443	1782.874091	0.00990099	spri	0.209568166	0.264060826	0.113302831	0.823778692
FBgn0015600	1772.969347	0.01980198	toc	0.062815027	0.0203225	0.028323708	0.287280394
FBgn0025885	2024.160728	0.02970297	Inos	7.573829109	3.078101514	2.301281509	1.182970125
FBgn0033188	1838.263211	0.02970297	Drat	0.555081964	0.674926813	0.768687227	3.109765441
FBgn0029092	1837.421211	0.02970297	ced-6	2.882803466	1.808282852	0.290471387	0.44379219
FBgn0037387	1691.137658	0.02970297	CG1213	0.070610635	0.059310609	0.140202753	1.03148287
FBgn0040259	1698.754728	0.03960396	Ugt302C1	0.069719249	0.037836676	0.205443909	0.720162471
FBgn0025631	1643.056188	0.059405941	moody	0.124256256	0.164502605	0.16898809	0.829768131
FBgn0000147	1525.934791	0.059405941	aurA	0.355031089	0.144695339	0.049822452	0.020047866
FBgn0028514	1965.325869	0.069306931	CG4793	1.163328576	3.479926912	6.126503287	0.832417069
FBgn0051195	1619.265937	0.069306931	CG31195	0.18591731	0.268755292	0.25566492	1.244929335
FBgn0015575	1609.304922	0.069306931	alpha-Est7	0.357807987	0.238346174	0.078636553	0.432375705
FBgn0004379	1486.934388	0.118811881	Klp67A	0.53145544	0.17975008	0.052416121	0.042857792
FBgn0036821	1517.862925	0.128712871	CG3961	0.59525653	0.136981051	0.035628814	0.028600595
FBgn0020257	1492.123903	0.128712871	Ppa	0.586521486	0.142797694	0.045109351	0.075883676
FBgn0028394	1592.838491	0.326732673	CG17834	0.086666984	0.109590264	0.250336162	0.46316348
FBgn0011232	1552.817346	0.396039604	scat	0.199224788	0.278371952	0.473786304	1.512211976
FBgn0014869	1631.025875	0.415841584	Pglym78	0.607922269	0.552801442	0.938289984	3.268256095
FBgn0259243	1606.770877	0.415841584	Pka-R1	0.374844624	0.476040594	0.803278017	2.454498396
FBgn0039113	1519.08881	0.495049505	CG10217	0.179929834	0.293528068	0.209067217	1.231466952
FBgn0032006	1487.165019	0.633663366	Pvr	2.092012102	1.375206952	0.296765271	0.208065508
FBgn0265760	1456.775079	0.633663366	lncRNA:CR44567	0.028538192	0.026423865	0.126488672	0.344508468
FBgn0033518	1350.293524	0.643564356	Prx2540-2	0.025729388	0.014634253	0.009831959	0.093416521
FBgn0010238	1378.808967	0.693069307	Lac	0.127812549	0.218838506	0.110978371	0.860566646
FBgn0033469	1631.872173	0.702970297	CG12133	0.138728445	0.515111998	1.270629543	0.145384759
FBgn0038804	1380.690644	0.732673267	CG10877	0.25136643	0.043387676	0.016814629	0.013266661
FBgn0051769	1409.615138	0.752475248	CG31769	0.178024449	0.388373257	0.253274252	1.526278012
FBgn0086370	1558.166318	0.782178218	sra	0.274235596	0.533912426	0.83868954	1.595931705
FBgn0001105	1630.514537	0.792079208	Gbeta13F	11.93244832	18.16685193	20.66741972	29.5464021
FBgn0040850	1425.284092	0.792079208	CG15210	0.109684648	0.158695112	0.338834696	1.172664014
FBgn0032140	1591.368127	0.861386139	CG13117	3.752659625	8.485325574	8.729919737	13.28057911
FBgn0033635	1703.385891	0.900990099	Prip	11.23307863	14.75875993	8.221328951	24.58391249
FBgn0050456	1320.244424	0.900990099	CG30456	0.511083876	0.24440513	0.040154808	0.046345875
FBgn0033134	1356.791214	0.940594059	Tsp42El	0.122954147	0.212965144	0.150222139	0.775008921
FBgn0030847	1445.440625	0.95049505	CG12991	0.226246197	0.497679863	0.836449946	1.958459696
FBgn0086906	1284.994287	0.97029703	sls	0.038633651	0.039020153	0.05290306	0.278979949
FBgn0033033	1454.094568	0.98019802	scaf	0.377796114	0.816011485	1.372893465	3.062036182
FBgn0037063	1417.858689	0.98019802	CG9391	0.36877966	0.377574195	0.376844792	1.468957367
FBgn0266000	1388.490149	0.98019802	CG44774	0.348236782	0.246422379	0.207147497	1.026182923
FBgn0033257	1328.451187	0.99009901	sand	0.009344418	0.010746031	0.057982415	0.155321572
FBgn0261385	1276.669716	0.99009901	scra	1.257688028	0.290241325	0.12627678	0.115847408
FBgn0031453	1424.879675	1	Bacc	6.308328604	3.642806002	1.539816324	1.716486509
FBgn0020304	1423.387982	1	drongo	0.976036937	1.089925406	1.381497747	4.414052568
FBgn0034880	1408.850085	1	ItgaPS5	1.226825915	4.890417987	0.643627566	0.194366875
FBgn0031037	1380.309904	1	CG14207	0.457780262	0.372632579	0.231581101	1.366133701
FBgn0030993	1349.001392	1	Mec2	3.993652967	4.055864547	1.130101189	0.480335478
FBgn0011722	1321.357362	1	Tig	2.095293198	0.963099105	0.282621876	0.211129182
FBgn0033926	1313.985552	1	Arc1	11.05785049	13.88737174	17.22611976	34.08560161
FBgn0040102	1295.138421	1	lectin-24Db	1.447471536	0.706505101	0.231130922	0.128826618
FBgn0262699	1245.72781	1	fzr	0.490834062	0.916531057	2.465216906	2.001181346
FBgn0267727	1234.603292	1	Pen	4.488468987	1.700985483	0.807847256	0.283754959
FBgn0051313	1217.895655	1	CG31313	0.077114808	0.102226077	0.061347718	0.611870817
FBgn0017581	1189.139657	1	Lk6	2.995873997	2.843055118	1.553973901	5.504049796
FBgn0259224	1165.059531	1	CG42324	0.014613771	0.017321665	0.003024581	0.190568573
FBgn0035083	1159.870075	1	Tina-1	0.351044813	0.11593235	0.058149815	0.037076854
FBgn0266719	1156.7478	1	stac	0.239136037	0.664777158	1.166197	1.832942536
FBgn0033032	1153.623651	1	kune	0.223505141	0.245277669	0.363466834	1.644426384
FBgn0014427	1141.440393	1	CG11899	0.14269555	0.078101208	0.029643238	0.238367463
FBgn0051374	1138.576884	1	sals	0.014398922	0.013918725	0.024375011	0.260710842
FBgn0033127	1136.662808	1	Tsp42Ef	0.057818193	0.037420914	0.024021299	0.235196068
FBgn0023129	1133.149408	1	aay	0.108163551	0.147301217	0.100024029	0.482497481
FBgn0027598	1129.882323	1	cindr	3.827792175	4.298579107	1.031265337	0.511349897
FBgn0031268	1115.044258	1	cold	0.104445902	0.155313934	0.100051693	0.55072654
FBgn0039101	1091.319057	1	CG16710	0.146962061	0.452029451	0.627063512	0.142615843
FBgn0261560	1084.659077	1	Thor	0.283241135	0.402472497	0.130025763	0.704261793
FBgn0050089	1079.896389	1	CG30089	0.107147738	0.02712872	0.010845787	0.008386609
FBgn0039941	1079.284566	1	CG17167	0.004258525	0.004022691	0.003172228	0.071533868
FBgn0037166	1068.81977	1	CG11426	0.038596077	0.043097341	0.155063646	0.539889106
FBgn0030085	1051.624468	1	CG6999	0.066662552	0.009657379	0.004210333	0.002546295
FBgn0262964	1047.35856	1	CR43275	0.036901166	0.063852058	0.029412973	0.186120884
FBgn0032311	1028.331202	1	CG12517	0.006442668	0.003224047	0.004529152	0.073567276
FBgn0023535	1025.308401	1	arg	0.108307959	0.04500389	0.006818362	0.032017853
FBgn0039099	1011.260846	1	GILT2	0.027349048	0.021023141	0.068965869	0.245117732
FBgn0267001	1006.85068	1	Ten-a	0.303928767	0.261492535	0.112464143	0.881224415
FBgn0034985	1006.601655	1	CG3328	1.220079646	0.677898702	0.167492054	0.079273973
FBgn0051324	985.45859	1	CG31324	13.52498988	12.17195066	2.62255292	6.340503185
FBgn0035444	977.8766384	1	CG12012	0.428216986	0.407795918	0.243358699	0.993341848
FBgn0052672	977.8018079	1	Atg8a	3.01651938	3.595582462	3.361154979	9.044983071
FBgn0036824	975.1116578	1	CG3902	0.52332131	0.126873151	0.093431898	0.031398223
FBgn0032139	965.1404663	1	CG13116	0.01505273	0.041428945	0.018496282	0.135133753
FBgn0014865	964.3427027	1	Mtk	0.684530892	0.305690416	0.151015663	0.257305453
FBgn0031470	949.8769809	1	CG18557	0.359373385	1.28284402	1.030687965	0.856152374
FBgn0031327	949.847296	1	CG5397	11.21142977	10.06929935	2.369863267	4.294961968
FBgn0263706	941.3025696	1	CG43658	0.313018548	0.125794802	0.01313974	0.057143797
FBgn0265991	940.1781644	1	Zasp52	1.569417893	2.025877932	2.34098985	6.18541874
FBgn0010314	923.5661605	1	Cks30A	0.483872537	0.053992705	0.052054426	0.034048974
FBgn0264894	917.368308	1	CG44085	0.355160053	0.693729914	0.177977837	1.734120171
FBgn0262985	914.6132785	1	CG43293	0.004870053	0.004179856	0.001403284	0.033767493
FBgn0037228	894.5714002	1	CG1092	3.425902801	2.094689609	0.762345518	0.775217555
FBgn0034523	878.6880154	1	Nnf1a	0.245182893	0.071035314	0.054845687	0.020755259
FBgn0013770	875.3424373	1	Cp1	18.02231624	12.82444931	5.671948431	11.07882077
FBgn0266405	867.7631709	1	lncRNA:CR45045	0.048973133	0.017482762	0.007515012	0.01051746
FBgn0285992	860.059993	1	hpRNA:CR46342	0.15573228	0.07440281	0.119950924	0.597146478
FBgn0031973	857.5447881	1	Spn28Dc	0.641582973	0.485474749	0.089115727	0.116327085
FBgn0031090	844.1449264	1	Rab35	2.03278538	3.891723448	5.895507815	7.071550177
FBgn0013720	843.7339398	1	pck	0.149864775	0.203000125	0.158136138	0.765181527
FBgn0260746	843.6715135	1	Ect3	0.261267414	0.466517694	1.690448211	0.816304167
FBgn0261244	841.4530807	1	inaE	0.418993308	0.448926848	0.552078312	1.917814084
FBgn0047178	841.1602466	1	CG32147	1.362264156	1.436054915	1.110670214	3.936212455
FBgn0085390	834.4341142	1	Dgk	0.115989304	0.306039596	0.568196483	0.957380316
FBgn0003525	827.2283596	1	stg	1.524061028	0.248726012	0.089994345	0.062936828
FBgn0012051	827.1573172	1	CalpA	1.05195071	2.814052335	3.463676295	3.88931393
FBgn0285925	826.3002564	1	Fas1	0.082161481	0.013704465	0.0095379	0.00271351
FBgn0030183	817.4377259	1	CG15309	0.068722936	0.053002404	0.017751877	0.081730449
FBgn0029506	815.3451315	1	Tsp42Ee	5.09555979	5.220071342	0.98879559	3.867905427
FBgn0051217	810.6590711	1	modSP	0.036400202	0.03430433	0.023058935	0.176568688
FBgn0260005	809.172801	1	wtrw	0.043919086	0.039747128	0.061026196	0.450957386
FBgn0031070	800.6399801	1	CG12702	0.282303862	0.105380136	0.028768562	0.008658166
FBgn0264437	800.312444	1	lncRNA:CR43855	0.801339814	0.93655044	2.090542536	0.137733636
FBgn0085307	798.4561427	1	CG34278	0.020436912	0.045056326	0.276713237	0.072976627
FBgn0000083	789.8583171	1	AnxB9	18.65980054	41.24774149	30.40824325	44.96571849
FBgn0259173	786.679461	1	corn	0.803108963	0.270873259	0.128685899	0.062946492
FBgn0043070	772.7636011	1	MESK2	2.616440126	5.049940022	5.029370915	9.952458147
FBgn0027594	769.1088011	1	drpr	1.186039414	0.795559599	0.154728276	0.21621847
FBgn0031878	767.4231255	1	sip2	0.449679547	0.149742382	0.070510459	0.043651542
FBgn0038973	762.037938	1	Pebp1	0.097855577	0.243953563	0.100033232	0.027385812
FBgn0267488	761.8712691	1	Mcr	0.213988413	0.357942277	0.299798475	1.195282552
FBgn0000579	749.013518	1	Eno	2.744309901	2.358761959	2.861101897	7.908048571
FBgn0030575	745.3010958	1	CG5321	0.054128702	0.121829057	0.402785638	0.054546717
FBgn0010387	742.6977819	1	Acbp2	0.694296761	1.042667825	6.560632243	1.250394633
FBgn0266307	736.8777494	1	asRNA:CR44972	0.012662993	0.024636203	0.113309246	0.231835373
FBgn0250848	734.4791584	1	26-29-p	4.695392571	2.305682543	1.080450663	0.858654865
FBgn0033502	729.1753845	1	CG12910	0.032394292	0.053387049	0.098345992	0.362943479
FBgn0051777	727.0882263	1	CG31777	6.752100592	6.229698807	3.259430938	1.027641741
FBgn0028427	727.0059695	1	Ilk	2.353643033	4.345504972	6.50219143	8.211945619
FBgn0039178	719.723186	1	CG6356	0.024467061	0.008181974	0.003687746	0.0015177
FBgn0001142	713.2552172	1	Gs1	0.2899494	0.068077643	0.02564997	0.03381253
FBgn0032946	711.9644215	1	nrv3	0.38763288	0.106087842	0.034627967	0.031184254
FBgn0266860	710.2127961	1	lncRNA:CR45321	0.142124503	0.056072428	0.016090933	0.007398757
FBgn0067311	704.9813353	1	CheB38b	0.014210387	0.025389952	0.048531742	0.184066739
FBgn0037956	704.8911331	1	CG6959	0.06706949	0.049625946	0.194476992	0.887651649
FBgn0013953	699.4193804	1	Esp	0.01237884	0.035119668	0.046761419	0.103812323
FBgn0037623	692.7419028	1	CG9801	0.05748305	0.039232316	0.493372673	0.470431906
FBgn0029521	685.586799	1	Or1a	0.034702002	0.025974048	0.083871236	0.173164956
FBgn0032350	685.3487726	1	CG6287	0.041798899	0.045568993	0.022466487	0.213832905
FBgn0019968	677.2003076	1	Khc-73	0.621139611	0.696004712	1.180358654	3.101725143
FBgn0259923	672.3025254	1	Sep-04	0.113816061	0.1708301	0.628360648	1.093396048
FBgn0003890	654.6579048	1	betaTub97EF	1.705451479	3.135351347	4.771857885	8.681084553
FBgn0035623	651.8327523	1	mthl2	3.285168736	9.507116163	7.532271956	3.362073731
FBgn0267220	648.8065361	1	lncRNA:CR45660	0.134142524	0.018506867	0.010897765	0.00891017
FBgn0285896	645.9770913	1	btl	0.075388837	0.246418763	0.308529577	0.766824266
FBgn0015399	645.0596794	1	kek1	0.496304276	0.266306148	0.070041775	0.030007337
FBgn0004456	642.0351276	1	mew	1.700872615	2.925118927	4.046513891	7.081024307
FBgn0259111	638.5646353	1	Ndae1	1.380892301	1.330133431	0.249667017	0.112001968
FBgn0058006	634.2511892	1	CG40006	0.132852566	0.023147329	0.012991826	0.006971431
FBgn0262794	623.9918675	1	CG43175	1.304042626	3.747977596	1.910160483	0.421900191
FBgn0053556	619.7090657	1	form3	0.013062535	0.010517862	0.030172751	0.250445305
FBgn0003206	619.3340654	1	Ras64B	0.62324817	1.034970845	1.605685219	2.980840785
FBgn0036433	611.1358747	1	CG9628	0.126982318	0.29679835	0.144334176	0.945945592
FBgn0030332	610.0570961	1	CG9360	0.105204606	0.04511747	0.018422531	0.022903892
FBgn0035968	599.7586718	1	Slc45-1	0.031641286	0.009371938	0.001083842	0.003929144
FBgn0039108	597.0816733	1	CG10232	0.391578768	2.682142138	1.083691067	2.206941844
FBgn0259221	593.8672944	1	ATP8A	0.277932425	0.691551537	1.252752484	1.733284616
FBgn0039226	590.0441852	1	Ude	0.075357286	0.125335292	0.07681712	0.457532929
FBgn0264343	582.4256994	1	CG43799	0.715857709	0.645014331	0.163786432	0.054353111
FBgn0032499	581.8829879	1	Uvrag	0.337288821	0.500661895	1.150606541	1.929914487
FBgn0261565	580.2272154	1	Lmpt	0.229740879	0.324533387	1.038115157	1.828331578
FBgn0032218	578.1425148	1	CG5381	0.044326716	0.079925228	0.130077587	0.327836618
FBgn0267795	576.8157134	1	Frl	8.886522233	13.94185902	15.62730617	18.25429793
FBgn0052066	573.589687	1	CG32066	1.533258444	3.792626009	4.831048377	4.308069954
FBgn0040398	570.0298471	1	CG14629	43.58375815	52.78916033	26.14956664	17.48076086
FBgn0001967	569.1841568	1	NimC3	0.275940287	0.052038872	0.032152173	0.026635683
FBgn0034417	565.4853262	1	CG15117	0.253669878	0.330461374	1.653393921	1.079610837
FBgn0028480	565.3803824	1	CG17841	0.466395921	0.735867855	2.88683741	1.048097073
FBgn0033520	564.7513267	1	Prx2540-1	0.036854541	0.024151986	0.016320012	0.199295849
FBgn0266417	562.4910036	1	ringer	1.16693131	1.774735214	1.963017633	4.694489807
FBgn0039844	561.319074	1	CG1607	0.153601836	0.085849555	1.813910419	0.762519115
FBgn0028331	560.6461494	1	l(1)G0289	1.429691752	0.888496039	0.159938314	0.272107495
FBgn0037240	558.8184677	1	Cont	0.17833888	0.214542624	0.210763637	0.752402646
FBgn0011817	557.0709598	1	nmo	0.467886501	0.395100238	0.708657164	1.793541902
FBgn0037447	553.1007635	1	Neurochondrin	0.012629429	0.001133589	0.035016633	0.209880358
FBgn0032420	546.4544001	1	CG6583	0.064391485	0.092627438	0.066930344	0.394187053
FBgn0032415	546.3132988	1	rho-6	0.019952608	0.037964937	0.161086592	0.126198089
FBgn0052396	545.0119556	1	CG32396	0.009742587	0.005400824	0.019542501	0.075194482
FBgn0263930	543.9452394	1	dally	0.276656194	0.869519257	0.659126188	2.406140189
FBgn0033476	533.4134201	1	oys	0.571499433	0.553186017	0.18035079	0.786821614
FBgn0033521	531.312021	1	CG12896	0.023908207	0.011816171	0.007747991	0.058931722
FBgn0004242	530.5098331	1	Syt1	0.024693386	0.020908963	0.018095831	0.265731314
FBgn0085466	528.9318534	1	CG34437	8.012953894	6.595466225	3.377568324	1.221470057
FBgn0051219	522.6272001	1	CG31219	1.157258061	2.933916604	2.022398304	0.522810608
FBgn0034221	518.2283125	1	CG10764	1.726659604	3.609896089	3.395333464	0.818034073
FBgn0032899	516.5303716	1	CG9338	0.437024095	0.179469304	0.17405738	0.624253181
FBgn0267641	516.350858	1	lncRNA:CR45979	0.022286697	0.025462323	0.040483206	0.185348309
FBgn0053460	513.6782868	1	CG33460	0.98912305	1.66432271	3.773486362	1.456881345
FBgn0033250	512.7951063	1	CG14762	0.018012175	0.059083545	0.025689404	0.238604232
FBgn0026320	512.2824937	1	Tom	0.014350342	0.023530806	0.044910022	0.288098937
FBgn0032078	510.0917365	1	C1GalTA	1.131659644	0.892323166	0.355615964	0.098436594
FBgn0039209	508.1793784	1	REPTOR	0.575603073	0.35596718	0.129719611	0.574397189
FBgn0285948	505.4604549	1	RpL27A	28.83237135	26.15862461	25.98414155	16.40243142
FBgn0000719	505.2902633	1	fog	0.580523202	0.350616627	0.085096842	0.042647084
FBgn0036449	497.1974256	1	bmm	0.167920175	0.229942123	0.337337278	0.935187968
FBgn0053494	496.1938121	1	CG33494	6.701148423	9.423576037	11.3572615	16.99166442
FBgn0050414	493.2960647	1	CG30414	0.466125304	0.395589769	0.158373006	0.034083095
FBgn0085334	493.247856	1	CG34305	0.049783633	0.02046555	0.004365075	0.005369965
FBgn0052368	492.3217528	1	CG32368	0.07639428	0.035057973	0.013805892	0.034976012
FBgn0034723	489.703866	1	CG13506	0.033858384	0.019263658	0.109337874	0.251322038
FBgn0265185	487.2686844	1	CG44250	0.212603319	0.567679037	0.253202212	0.06453601
FBgn0040232	487.1559222	1	cmet	0.350629125	0.118137436	0.035309222	0.028973052
FBgn0015924	486.7674727	1	crq	1.813457014	1.375803702	0.409899483	1.340493705
FBgn0015396	479.1435345	1	jumu	0.493858132	0.141025659	0.067131355	0.038239754
FBgn0264090	475.8813107	1	CG43759	0.428829078	0.149135856	0.030112258	0.130377865
FBgn0036341	474.7027528	1	Syx13	0.654574197	1.086216692	0.830092136	2.684695093
FBgn0031913	474.0705889	1	CG5958	1.054683427	0.730982288	0.15966585	0.26377871
FBgn0030048	468.6995149	1	CG12112	0.591021361	1.206826343	2.225115474	1.814163093
FBgn0033777	467.4498702	1	CG17574	2.695964122	1.819829578	0.572756591	0.727760815
FBgn0027865	463.1811521	1	Tsp96F	0.366587318	0.174328721	0.111552118	0.555518908
FBgn0000146	461.3094531	1	aub	0.05775124	0.013519031	-0.000930249	0.004147113
FBgn0032681	456.3147143	1	CG10283	0.028724001	0.040159666	0.068932315	0.362488822
FBgn0037819	456.2194661	1	CG14688	0.104709439	0.027947471	0.036507041	0.327255657
FBgn0263088	455.0637769	1	lncRNA:CR43356	0.005351274	0.008153563	0.026603506	0.067765065
FBgn0053113	454.0529965	1	Rtnl1	7.851481602	12.20802042	16.22739186	14.68227643
FBgn0036806	452.0277859	1	Cyp12c1	0.187138946	0.149977652	0.039724972	0.053545595
FBgn0038545	449.2623509	1	pasi1	0.128397211	0.123791992	0.081366257	0.399294334
FBgn0032252	448.946018	1	loh	0.062016028	0.007505922	0.003906822	0.005652766
FBgn0052280	446.046668	1	CG32280	0.038124892	0.024800448	0.020759366	0.138486379
FBgn0020414	444.7345959	1	Idgf3	4.144495794	2.438537827	0.858406007	1.042386924
FBgn0004378	438.4565999	1	Klp61F	0.738694915	0.16267115	0.079766194	0.041834307
FBgn0051451	437.2429671	1	lncRNA:CR31451	0.006571415	0.005028283	0.001725949	0.037627919
FBgn0265140	436.5413897	1	Meltrin	6.899384438	9.446096608	1.956646613	5.114193146
FBgn0003495	435.9154182	1	spz	4.115077991	2.709296703	1.171301417	0.432531746
FBgn0039075	435.760822	1	CG4393	0.031442124	0.057631429	0.116933307	0.448370685
FBgn0024227	434.743952	1	aurB	0.852730727	0.3012508	0.117991281	0.080429259
FBgn0000308	433.5995018	1	chic	15.1185061	22.96173352	23.34768974	27.85610586
FBgn0030747	433.4937041	1	CG4301	0.195741983	0.370396638	0.075282527	0.02844924
FBgn0261549	432.7892526	1	rdgA	0.053607368	0.037452885	0.032217017	0.421421802
FBgn0031547	429.0067143	1	Sr-CIV	0.818968619	2.042126454	3.123648961	1.92746082
FBgn0027563	427.2326346	1	CG9631	0.017391546	0.015029744	0.008216421	0.104974131
FBgn0032856	424.9886319	1	CG16798	0.014329892	0.00968757	0.063543219	0.178906016
FBgn0011705	421.9384361	1	rost	0.71043155	1.283803762	0.290803951	0.083782439
FBgn0026189	418.0420871	1	prominin-like	1.852463806	3.923635732	3.960983429	8.514163162
FBgn0031220	417.8005084	1	CG4822	0.449009804	0.246820826	0.067612789	0.175142642
FBgn0029131	416.1590427	1	Debcl	1.12719987	2.256379599	3.369404129	4.092989372
FBgn0265274	411.8101746	1	Inx3	0.006779994	0.01401625	0.00561133	0.037866807
FBgn0028424	406.9710586	1	JhI-26	0.346918691	0.436160056	0.231844997	0.782501779
FBgn0038098	406.9281936	1	CG7381	0.065568169	0.092006735	0.142497176	0.606020415
FBgn0002924	406.1675808	1	ncd	0.61287183	0.198741652	0.074909909	0.056032057
FBgn0027783	405.4541862	1	SMC2	0.416808608	0.113203828	0.090608043	0.023853097
FBgn0053461	405.13488	1	CG33461	0.272446688	0.487764766	1.544682561	0.328149586
FBgn0035173	404.6328859	1	CG13907	0.652365641	0.718587282	0.135656899	0.48700507
FBgn0037443	400.4279522	1	Dmtn	0.20992565	0.114805741	0.025222386	0.057235266
FBgn0051781	395.4552093	1	lncRNA:CR31781	0.005805293	0.005111873	0.009328343	0.060160899
FBgn0050115	391.2057866	1	GEFmeso	0.554576111	0.775775196	2.453811013	2.422291951
FBgn0036299	388.109901	1	Tsf2	0.066398559	0.083107483	0.073025671	0.402555925
FBgn0053465	386.7629501	1	CG33465	0.370080237	0.340745309	0.346631785	0.026496115
FBgn0038053	384.4864159	1	CG18549	0.746034699	0.428700894	0.118110065	0.100593299
FBgn0035879	383.8146888	1	GAPcenA	0.522176536	0.669013561	1.513864156	2.045542419
FBgn0036663	383.1820456	1	CG9674	0.526395059	0.851610577	2.083104377	2.015758306
FBgn0036144	378.7330151	1	GlcAT-P	2.311226584	1.158423507	0.441548867	1.394852148
FBgn0086356	377.0146011	1	tum	0.623871575	0.240197657	0.073968601	0.041731348
FBgn0050090	376.0552942	1	CG30090	0.509936317	1.248252093	1.525571552	1.268141609
FBgn0038243	374.0133387	1	CG8066	1.242781033	1.500801234	1.145309939	2.880201506
FBgn0039927	373.2754718	1	CG11155	0.047690346	0.088997503	0.044831386	0.282399214
FBgn0053329	366.172872	1	Sp212	0.341680162	0.534538989	0.296748151	1.335729243
FBgn0032264	362.4654465	1	Lip4	0.046013683	0.091983636	0.190190019	0.314911659
FBgn0034200	361.2896045	1	Gbp2	0.101690857	0.148045897	0.141010535	0.800189231
FBgn0013679	360.2321838	1	ND1	29.2905693	29.14389312	35.89812877	24.90992459
FBgn0041183	359.3618775	1	Tep1	5.374678261	13.31640832	10.2145224	6.347904169
FBgn0038964	353.8642094	1	Nop56	1.482450161	0.961807773	1.100438806	0.198176615
FBgn0032889	351.6417238	1	CG9331	1.968723219	1.163869843	0.535603675	1.83393434
FBgn0262477	351.2048343	1	FoxP	0.045390313	0.131599364	0.20299394	0.605137296
FBgn0265512	350.8171333	1	mlt	0.015280505	0.024078837	0.000780173	0.027120058
FBgn0037468	345.8813518	1	CG1943	3.101605488	4.010281125	3.060479862	8.553516266
FBgn0260986	342.6297804	1	mei-38	0.099898541	0.007804541	0.021833787	0.010796301
FBgn0034642	341.1911709	1	CG15674	0.009407522	0.019366383	0.097071382	0.02575308
FBgn0037167	336.6650198	1	CG11425	0.034146621	0.030574159	0.08012439	0.504581255
FBgn0039328	335.5782054	1	CHKov2	0.046915778	0.020583296	0.006764815	0.066164056
FBgn0017558	335.1337818	1	Pdk	0.372623576	0.224596588	0.196772375	0.682046275
FBgn0039419	331.2178943	1	CG12290	0.365613607	0.267746054	0.043836639	0.019668147
FBgn0015795	330.8661769	1	Rab7	2.15144477	3.853499735	3.180323514	6.881197216
FBgn0000318	330.5529324	1	cl	2.645328359	3.589449378	7.741311481	7.893191806
FBgn0037843	329.4837658	1	CG4511	0.659743538	1.706124673	2.351904416	2.280006355
FBgn0031313	327.4400931	1	CG5080	0.077662721	0.030075209	0.006399769	0.011001414
FBgn0267487	326.8523899	1	Ptp61F	0.478060128	0.613220857	1.375205476	2.026694575
FBgn0051051	321.1382485	1	CG31051	0.322393052	0.195332777	0.049511158	0.042152319
FBgn0052816	318.0723998	1	CG32816	0.070411829	0.01699567	0.014779636	0.017494335
FBgn0038349	313.543551	1	AOX3	0.305812924	0.158476296	0.162647996	0.62430862
FBgn0265276	312.7913449	1	l(3)neo38	0.038192433	0.013398166	0.02630849	0.133776708
FBgn0020249	311.3840113	1	stck	1.000782611	2.128129188	3.180724191	3.19141207
FBgn0035603	311.0702366	1	Pfdn4	0.882472989	1.29339246	2.678486634	2.196047289
FBgn0031069	310.3891084	1	Pmp70	0.929096674	2.028886442	1.759390469	0.379439119
FBgn0262808	309.2544885	1	CG43179	0.083064473	0.098996983	0.588453658	0.09761568
FBgn0003074	307.8050953	1	Pgi	0.442003308	0.395834666	0.397474982	1.630533866
FBgn0265726	304.801947	1	Nna1	0.008293624	0.016709223	0.011512637	0.114768372
FBgn0052091	304.4121273	1	CG32091	0.023975617	0.018950295	0.02665632	0.181485168
FBgn0030778	304.3268409	1	CG4678	0.058102373	0.074692926	0.148446208	0.322721645
FBgn0010246	303.8710171	1	Myo61F	7.464793567	12.35645715	12.02173636	15.60802393
FBgn0030501	299.5341853	1	BthD	0.144338254	0.043236228	0.050809292	0.009259847
FBgn0035896	298.4933279	1	CG6983	0.256108526	0.600835086	0.931736936	1.353627775
FBgn0001941	296.3075339	1	ifc	2.186681604	3.634038846	5.901118008	5.432809296
FBgn0004647	295.3629955	1	N	0.941954996	0.245823251	0.105301752	0.078819681
FBgn0040104	295.2066943	1	lectin-24A	0.296608355	0.871029191	0.359892011	0.112179741
FBgn0031460	294.4479541	1	CG15399	0.058710842	0.072399144	0.055261008	0.345088252
FBgn0033880	294.3160251	1	CG6553	0.308874244	0.55834375	0.057743635	0.034160608
FBgn0001248	292.9683053	1	Idh	2.452404519	1.038966524	0.661631002	0.779129335
FBgn0250906	292.7735631	1	Pgk	0.863181351	0.699132548	0.537370738	1.760927189
FBgn0001091	292.7179585	1	Gapdh1	1.813007957	1.218371807	1.335376403	4.449822765
FBgn0035542	292.4553387	1	DOR	0.148010731	0.18718076	0.058219312	0.266794274
FBgn0028526	292.3154324	1	CG15293	0.010311152	0.036618489	0.02788304	0.159284361
FBgn0037989	289.3863368	1	ATP8B	0.67367735	1.877211481	1.138002173	0.216411811
FBgn0027500	288.2137507	1	spd-2	0.231507053	0.05907165	0.03954988	0.009529774
FBgn0267252	288.0277617	1	Ggamma30A	7.045917946	18.68009986	9.625190257	5.302110885
FBgn0261988	287.8073834	1	Gprk2	0.91856468	1.542802657	3.748178924	2.927060263
FBgn0040212	286.7898574	1	Dhap-at	0.238889541	0.466635239	1.039174577	0.672864645
FBgn0032731	284.8124492	1	Swip-1	4.423556737	8.442865776	8.209656837	10.60936858
FBgn0058469	283.6985957	1	lncRNA:CR40469	8.758519848	6.712970312	5.982362392	12.46710427
FBgn0036030	283.1526201	1	CG6767	0.385918982	0.204719361	0.207803555	0.697557837
FBgn0041629	281.6241476	1	Hexo2	7.72284977	4.550270771	2.618041235	2.041300819
FBgn0030529	281.4822413	1	Clic	2.940521738	3.438813127	8.101943698	5.046123096
FBgn0040382	281.1641241	1	CG5273	0.497130733	0.163200341	0.068360714	0.063963703
FBgn0038476	280.6154703	1	kuk	1.061170384	0.499018429	0.139749356	0.115969287
FBgn0260660	277.9737771	1	Mp	0.082529228	0.163644292	0.310128463	0.263433036
FBgn0262656	275.3254181	1	Myc	1.62655079	0.947106243	0.78175214	0.155366894
FBgn0011606	275.3110185	1	Klp3A	0.393760919	0.147236096	0.048030815	0.034358202
FBgn0020762	273.4045213	1	Atet	0.178077259	0.092793602	0.033251869	0.036284726
FBgn0030326	273.0098321	1	CG2444	0.57448282	0.133846641	0.079732188	0.098448848
FBgn0032848	272.1829256	1	nesd	0.310819234	0.080191389	0.050905664	0.015642677
FBgn0036485	270.8503209	1	FucTA	0.039011654	0.125063365	0.192524787	0.459335708
FBgn0014133	270.3341052	1	bif	1.869302576	3.402322629	4.822829811	5.785800799
FBgn0259481	269.8357429	1	Mob2	1.474351138	3.383592137	4.046458592	4.949175251
FBgn0035210	269.6723266	1	msd5	0.171538541	0.075751494	0.041776993	0.009685033
FBgn0011286	269.4701058	1	RyR	0.008326859	0.016841015	0.014346974	0.105349751
FBgn0036891	268.8701889	1	CG9372	4.826304568	4.394715771	1.141823642	1.348579314
FBgn0263220	267.3232877	1	Hk	0.00262743	-0.000374534	0.000964098	0.003997431
FBgn0263400	266.446114	1	CG43446	0.172767623	0.302818734	0.05501509	0.198938067
FBgn0031457	265.6775897	1	CG3077	0.620456716	1.002535923	1.323897698	2.768685233
FBgn0262582	265.3443922	1	cic	0.974105452	1.397636264	2.538463664	4.343757158
FBgn0039759	265.1511272	1	CG9733	0.663754617	4.601996642	1.704871017	2.245116997
FBgn0030114	264.9275114	1	CG17754	0.362083344	0.609615702	0.839356446	1.840013915
FBgn0034139	264.6976277	1	CG4927	1.574679469	1.013684	0.370721506	0.152520053
FBgn0000636	263.837488	1	Fas3	0.210931156	0.753948744	0.527474222	1.530255659
FBgn0086704	257.0747675	1	stops	0.024716531	0.043701427	0.074921834	0.236588493
FBgn0036419	256.8384843	1	CG13482	0.012733845	0.016341024	0.009182828	0.099162745
FBgn0052407	256.2164342	1	CG32407	0.120246604	0.135048174	0.551846176	0.2372621
FBgn0030241	255.9202238	1	feo	0.855456822	0.241923534	0.09172093	0.065028848
FBgn0040206	255.4465791	1	krz	0.727038818	1.194791597	1.545503763	3.023604169
FBgn0037753	254.8535863	1	CG12947	0.090057707	0.258898925	0.471492157	0.190096685
FBgn0037028	254.1638965	1	CG3618	0.08182566	0.034584876	0.008096513	0.002843703
FBgn0031816	251.7839295	1	Rchy1	0.108043226	0.033383017	0.015291606	0.010746591
FBgn0052264	251.2027025	1	CG32264	0.259471305	0.353889685	1.097587535	1.605202095
FBgn0264542	250.5796613	1	hwt	0.02636789	0.052220446	0.125985585	0.107925077
FBgn0261859	250.5177091	1	CG42788	0.23525729	0.214383753	0.034366015	0.064987463
FBgn0003124	250.0966446	1	polo	0.702025157	0.184905983	0.081840199	0.045750361
FBgn0026179	249.8251368	1	siz	0.050082235	0.02955857	0.095493956	0.210190837
FBgn0267200	248.5834959	1	lncRNA:CR45640	0.019983325	0.022142844	0.030518447	0.001262072
FBgn0262902	247.9160657	1	asRNA:CR43257	0.086999466	0.083695478	0.097206163	0.203643517
FBgn0003660	247.1139004	1	Syb	5.455562469	9.004104176	11.3338912	12.85782837
FBgn0030994	246.876945	1	HP1D3csd	0.767245657	0.652786139	0.203418165	0.119958997
FBgn0002543	244.0656728	1	robo2	0.059040805	0.036729243	0.013445669	0.001803361
FBgn0050088	243.0103406	1	CG30088	0.039440782	0.083096819	0.132795589	0.138435778
FBgn0040723	242.9978267	1	CG5011	0.020952041	0.035819597	0.092292962	0.07668382
FBgn0035203	241.9326502	1	CG9149	0.657161128	0.686707133	1.812181754	2.383777676
FBgn0011674	241.6711993	1	insc	0.049495203	0.186215564	0.197190183	0.187141563
FBgn0027108	240.3188825	1	Inx2	0.009238358	0.014704298	0.007897425	0.067487954
FBgn0015000	238.9991897	1	betaggt-I	0.39805953	0.895559927	1.057605895	1.203898771
FBgn0022160	238.6017709	1	Gpo1	0.064285381	0.181033279	0.38501292	0.147201902
FBgn0262160	238.5638662	1	CG9932	1.275404138	1.918408375	3.838918575	4.528165518
FBgn0029095	237.2996491	1	aru	2.316521957	4.418135419	6.383137446	7.967762967
FBgn0010228	236.7264007	1	HmgZ	3.346082813	1.597539306	1.337450053	0.423143012
FBgn0266084	236.5294393	1	Fhos	0.031267523	0.068773795	0.031588178	0.118811407
FBgn0042106	236.3312056	1	CG18754	2.507328971	8.193593872	1.885058175	1.606090168
FBgn0037025	235.1866565	1	Spc105R	0.141791957	0.044695972	0.017360733	0.010569922
FBgn0004106	233.4456505	1	Cdk1	0.47499763	0.260087911	0.189349839	0.056542655
FBgn0011837	233.353855	1	Tis11	4.239201733	2.881452586	1.297995132	2.522101202
FBgn0037007	232.979802	1	CG5059	0.323953992	0.179842216	0.098262177	0.406526997
FBgn0037680	232.412027	1	pasi2	0.135731326	0.19058614	0.14898759	0.638804553
FBgn0040007	231.8669843	1	RpL38	29.67272134	28.94571678	30.35929532	19.09651243
FBgn0034290	231.621946	1	CG5773	0.01032478	0.004189415	0.003626246	0.007382066
FBgn0015568	231.2478074	1	alpha-Est1	0.110542602	0.041876971	0.015803485	0.005302443
FBgn0262620	230.8195587	1	lncRNA:CR43144	0.015553119	0.006499012	0.008448579	0.00520672
FBgn0001233	230.7462578	1	Hsp83	4.273520144	3.804229547	6.105909755	2.471150753
FBgn0053111	230.5806551	1	CG33111	0.391946925	0.394966885	1.403913935	1.623816608
FBgn0002466	230.4221199	1	sti	0.372966781	0.092404608	0.039919135	0.023348636
FBgn0016078	229.4289971	1	wun	0.216546887	0.430998558	0.953061482	0.815110159
FBgn0032955	227.7717923	1	CG2201	0.113294418	0.209910304	0.23515797	0.665644425
FBgn0037130	227.5934441	1	Syn1	0.169536759	0.038417909	0.019561383	0.010649776
FBgn0003268	227.5879602	1	rod	0.286493222	0.058577155	0.049470485	0.060163585
FBgn0016797	226.7705004	1	fz2	0.107896874	0.059598394	0.039469058	0.200223556
FBgn0004055	226.6323583	1	uzip	0.061532097	0.012229609	0.003713181	0.013835047
FBgn0266569	226.409551	1	CG42259	3.06084651	2.268657908	0.74294538	1.088820939
FBgn0036752	226.2578031	1	Adgf-A	1.072227129	1.602543777	3.397127066	4.267453782
FBgn0262972	226.1344665	1	lncRNA:cherub	0.021162743	0.012816708	0.020880048	0.169516321
FBgn0260006	225.509111	1	drd	0.011397611	0.03227435	0.018648213	0.051716984
FBgn0015714	222.7468084	1	Cyp6a17	0.311384798	0.22758587	0.06598404	0.110897572
FBgn0036147	222.291378	1	Plod	5.074974638	2.628033012	1.70122674	3.004424029
FBgn0035142	220.5920301	1	Hipk	1.127731675	1.150898191	1.2886982	3.231589886
FBgn0025739	219.0712788	1	pon	0.081665348	0.013082219	0.005199456	0.001969556
FBgn0013995	218.241539	1	Calx	0.008262953	0.015498662	0.001979067	0.025993697
FBgn0259735	217.3875485	1	mtgo	2.040386696	1.35539198	0.423611276	0.399589451
FBgn0035204	217.3793507	1	CG2277	0.133549446	0.143840633	0.336526727	0.522195163
FBgn0036354	217.0276656	1	Poc1	0.251535862	0.085346999	0.037330524	0.024607061
FBgn0033548	216.936944	1	CG7637	1.331650953	0.676624818	0.98254437	0.227979776
FBgn0052638	216.5800074	1	CG32638	0.560007872	0.4187385	0.144333272	0.470098685
FBgn0261989	216.1819434	1	CG42807	1.012793082	0.474231141	0.250478979	0.171927853
FBgn0022702	215.730203	1	Cht2	0.260100554	0.413476858	0.09441379	0.030623472
FBgn0032698	215.3007308	1	CG10336	0.093051305	0.042156503	0.049109101	0.011117988
FBgn0030234	215.0961265	1	CG15211	1.337894744	1.171821263	0.605885301	0.226692314
FBgn0038299	214.0583408	1	Spn88Eb	1.376339302	3.358499439	2.460175083	1.401092405
FBgn0039155	214.0039666	1	Kal1	0.039460327	0.201520673	0.119928625	0.356428034
FBgn0041585	213.718014	1	olf186-F	1.132005275	2.276334562	2.609219873	2.258507078
FBgn0030520	213.5537292	1	Pdcd4	1.354155756	1.018898148	0.264525401	0.541884841
FBgn0015765	213.3504345	1	p38a	1.115047513	1.996347567	2.60441271	4.089493721
FBgn0041605	213.3056411	1	cpx	0.094292997	0.012022657	0.014632959	0.105031004
FBgn0040383	213.0751437	1	CG5254	0.443854298	0.41391256	0.139654449	0.540452153
FBgn0035767	212.9852381	1	Cln7	0.387886654	0.222617933	0.085039058	0.16981145
FBgn0263490	212.4892849	1	mld	0.148697132	0.062310801	0.015171206	0.032198798
FBgn0052528	211.6190744	1	parvin	0.667095982	1.266727036	1.902269333	2.593560417
FBgn0003463	211.5680814	1	sog	0.02351416	0.00272877	0.0327633	0.036232283
FBgn0002609	211.4862387	1	E(spl)m3-HLH	0.03736458	0.017051274	0.002553399	0.000664796
FBgn0003093	211.191425	1	Pkc98E	0.656461291	0.803098827	2.324486773	2.397748947
FBgn0028546	209.5998873	1	ics	1.20173757	2.407397413	2.517181684	4.336521779
FBgn0030336	208.9425605	1	CG1578	0.370100165	0.33071698	0.214125237	0.654883607
FBgn0004197	208.5694955	1	Ser	0.277772971	0.09936401	0.023286352	0.03157484
FBgn0038974	207.8194636	1	CG5377	0.647799718	0.849002084	0.315979349	0.105566101
FBgn0004569	207.8127547	1	aos	0.051459876	0.031060996	0.575249969	0.106085873
FBgn0014388	207.7659732	1	sty	3.007841389	1.992781194	0.953697755	0.30511896
FBgn0263659	204.9560433	1	lncRNA:CR43650	0.173684897	0.090542504	0.058753953	0.038042534
FBgn0012036	204.6862501	1	Aldh	3.842869437	2.559950579	1.503348884	3.228209273
FBgn0014469	203.4699062	1	Cyp4e2	1.175397664	1.316131269	0.40454109	0.36259098
FBgn0030065	202.9120071	1	CG12075	0.021848111	0.036495759	0.019667481	0.175743622
FBgn0032726	202.8997946	1	CG10621	0.082281871	0.091504448	0.021967133	0.195155718
FBgn0000158	201.165941	1	bam	0.092895609	0.018286947	0.010706781	0.002929732
FBgn0041150	200.1635167	1	hoe1	0.297026176	0.070149858	0.019346906	0.017768595
FBgn0027949	200.1458946	1	msb1l	0.242484168	0.093362758	0.036685852	0.013024058
FBgn0000273	200.0789008	1	Pka-C1	0.420150943	0.511903284	1.2452381	1.552963841
FBgn0034885	199.3064642	1	Eglp4	0.161937548	0.096639236	0.022850124	0.015576695
FBgn0032191	199.1382071	1	CG5734	2.040474952	5.206822984	3.115041033	5.900859636
FBgn0033906	198.6213458	1	ReepB	2.967780753	2.884477582	3.893256953	7.858916036
FBgn0005683	198.1125657	1	pie	0.049806585	0.027147364	0.013544141	0.005793989
FBgn0027508	197.01605	1	Tnks	0.182566693	0.193390831	0.359976251	0.796491903
FBgn0000490	195.6804421	1	dpp	0.110839934	0.031598362	0.011283398	0.014065929
FBgn0036549	195.3276714	1	CG10516	0.034937917	0.091506603	0.038344898	0.216570593
FBgn0032638	195.202575	1	SPH93	0.285131642	0.395612158	0.168610274	0.037917705
FBgn0051145	194.8624221	1	CG31145	0.051037086	0.050849167	0.164587017	0.270773319
FBgn0050098	194.7796288	1	CG30098	0.049876029	0.149715796	0.091384467	0.210046977
FBgn0050069	194.0473243	1	CG30069	0.03442773	0.087448009	0.138833936	0.470836784
FBgn0000279	193.7395636	1	CecC	1.931581028	5.431900102	2.385168411	1.339602538
FBgn0037612	193.7019377	1	CG8112	0.165896352	0.253734817	0.353259746	0.055147927
FBgn0041180	193.6595056	1	Tep4	2.173163425	1.63815592	1.411877229	3.173403488
FBgn0001235	193.4779999	1	hth	0.044598658	0.052921207	0.181583407	0.207356835
FBgn0050463	193.3752882	1	Pgant9	0.756107461	0.269272757	0.115087454	0.046552788
FBgn0263392	192.0263947	1	Tet	0.135442364	0.03201682	0.015765599	0.007179012
FBgn0050046	191.8817725	1	CG30046	0.545930611	0.718207664	0.5022129	0.126920585
FBgn0032727	191.7644081	1	CG10623	0.211029576	0.11210008	0.046439736	0.044027653
FBgn0030876	191.1592542	1	CG6762	0.562182513	0.481500151	0.289394794	1.09845859
FBgn0036801	190.7092851	1	MYPT-75D	0.158512789	0.131962413	0.035645848	0.012256544
FBgn0260991	190.5100148	1	Incenp	0.619862327	0.135112521	0.067378207	0.062024802
FBgn0028940	190.0274215	1	Cyp28a5	0.496407878	0.544035225	0.098156817	0.269267118
FBgn0000140	189.8431032	1	asp	0.127520671	0.01320533	0.012208821	0.016662859
FBgn0041582	189.7603517	1	tamo	0.189609274	0.158642641	0.062723593	0.187891823
FBgn0039045	189.4189282	1	CG17119	0.166581526	0.481788992	0.266106868	0.688625898
FBgn0067783	188.6710527	1	DPCoAC	0.108685689	0.118157845	0.093689214	0.288979986
FBgn0004629	188.2535397	1	Cys	2.154377517	1.973897331	0.564878315	0.528835621
FBgn0010051	188.2469716	1	Itp-r83A	0.416441669	0.523486702	1.362827367	1.661154505
FBgn0034736	188.1851863	1	gas	0.393345034	0.179476013	0.033164812	0.03357945
FBgn0003062	187.6166069	1	Fib	1.189172852	0.842730495	0.831478281	0.153195085
FBgn0030670	187.5912318	1	Pis	0.620554326	1.01808777	1.64172858	2.636381228
FBgn0053978	187.4099504	1	CG33978	0.085433737	0.052475833	0.01200613	0.01286204
FBgn0031886	187.3384763	1	Nuf2	0.094858106	0.040576319	0.026543782	0.00645773
FBgn0261458	187.1913754	1	capt	9.439568646	15.68916096	16.87503038	18.64595536
FBgn0003545	187.1496751	1	sub	0.151388713	0.055092455	0.022336142	0.008634373
FBgn0032906	186.743824	1	RPA2	0.527576931	0.276191559	0.229390811	0.053598944
FBgn0038803	186.5437149	1	CG5191	0.05852305	0.024758758	0.005528666	0.014922291
FBgn0040099	185.6261807	1	lectin-28C	8.898290385	10.26756553	3.607534355	5.088328266
FBgn0086708	185.2362489	1	stv	0.083606307	0.098280604	0.233617502	0.644036962
FBgn0034335	185.1620371	1	GstE1	0.093048492	0.183234595	0.0825891	0.159127463
FBgn0041710	184.62646	1	yellow-f	2.247250994	3.281794405	6.227607744	4.251112639
FBgn0028490	184.021624	1	CG31705	1.84416773	3.71100115	2.764303294	5.38098248
FBgn0034390	183.8059294	1	CG15093	1.042194649	0.453693808	0.385476679	0.16458994
FBgn0036101	183.167227	1	NijA	0.685714199	0.52182697	0.299618823	0.211174738
FBgn0039250	182.6841573	1	Mink	0.432937991	0.13750126	0.044692598	0.040799677
FBgn0025682	182.4531848	1	scf	2.493206237	1.505666149	0.788449278	0.36101219
FBgn0053144	181.8487478	1	CG33144	0.128718996	0.128185535	0.150735363	0.598113986
FBgn0035237	181.4989076	1	CG13917	0.11713418	0.204418314	0.367441904	0.441573552
FBgn0266410	181.4702961	1	CG45050	3.948949514	4.561608984	4.393814217	8.321280584
FBgn0023479	181.4459337	1	teq	0.139158283	0.032072496	0.019861764	0.013933646
FBgn0031948	181.3866965	1	CG7149	0.084324655	0.018968282	0.014562451	0.011247843
FBgn0052177	181.1565394	1	Ndfip	0.118844136	0.091229448	0.104660924	0.22340219
FBgn0063491	181.016289	1	GstE9	0.035933507	0.062783806	0.020777477	0.07948825
FBgn0034399	179.5012795	1	CG15083	0.598094758	0.284079142	0.087769564	0.124067904
FBgn0034354	179.4765112	1	GstE11	0.213642301	0.289731955	0.055533569	0.129277588
FBgn0032192	178.3360057	1	CG5731	0.044285052	0.018737782	0.00731348	0.004383702
FBgn0038037	178.3033829	1	Cyp9f2	0.947537449	1.404611069	0.725687501	1.92426112
FBgn0034691	178.1869701	1	Synj	0.317703257	0.436486324	0.78809695	1.447924027
FBgn0054003	177.7055917	1	NimB3	0.291858734	0.090190783	0.025674816	0.018817357
FBgn0001301	177.6976472	1	kel	0.089428555	0.102044413	0.056991775	0.247966539
FBgn0038720	177.3946259	1	CG6231	0.249168569	0.34273343	0.33934818	0.930472366
FBgn0015221	177.1330427	1	Fer2LCH	5.607846227	3.624068894	1.919815045	2.599358332
FBgn0039098	176.3319995	1	GILT3	0.126834563	0.195660263	0.387022092	0.335762008
FBgn0036587	176.1419297	1	CG4950	0.157375254	0.019351535	0.013247494	0.010707137
FBgn0032156	176.1353515	1	CG13124	0.526439318	0.698845475	0.57870978	1.510297003
FBgn0026713	175.9896063	1	l(1)G0007	0.434215688	0.433284645	0.519114832	1.356229529
FBgn0029937	175.1466292	1	CG8300	0.714377118	0.855903269	0.433016452	1.207750349
FBgn0035146	174.0532861	1	CG13893	0.070674707	0.216546785	0.111073609	0.343993734
FBgn0264490	173.8110297	1	Eip93F	0.035966086	0.064775294	0.024145232	0.160489531
FBgn0027611	173.7326706	1	LManII	0.415376781	0.250450211	0.205788752	0.07731107
FBgn0267824	173.2927338	1	PRAS40	0.141721358	0.088996349	0.032239846	0.158910348
FBgn0004387	173.128085	1	Klp98A	0.622047471	1.384649514	1.630408601	2.117909252
FBgn0011260	173.1117758	1	Sema2a	0.219860565	0.09008368	0.061178923	0.01816545
FBgn0035888	172.9623176	1	CG7120	0.614631359	0.47495252	0.317117771	0.073913025
FBgn0033649	172.8846545	1	pyr	0.398356523	1.491342819	0.855726624	0.565931427
FBgn0035770	172.4197183	1	pst	0.779118182	0.90300843	0.523565402	1.016829762
FBgn0036165	171.4631242	1	chrb	0.155694206	0.181016712	0.048391	0.141203921
FBgn0000578	171.1674408	1	ena	2.111730237	1.519919968	0.377858554	0.424273172
FBgn0040503	171.0869641	1	CG7763	0.009144608	0.059618949	0.031894007	0.061115258
FBgn0033990	171.0483541	1	CG10265	0.042731668	0.012940797	0.004640264	0.00180783
FBgn0035312	170.8028842	1	CG15820	0.094638736	0.051671386	0.056161236	0.141375456
FBgn0063497	170.3935032	1	GstE3	0.091574724	0.133444331	0.031851278	0.079924915
FBgn0023170	170.3029069	1	RpL39	86.82815283	75.03012753	74.8658265	62.02073888
FBgn0026315	170.1870289	1	Ugt35A1	0.576667479	0.686601208	1.533532264	1.917491677
FBgn0259711	170.0387379	1	CG42365	0.167169828	0.176937525	0.145838985	0.653087112
FBgn0035868	168.8887756	1	CG7194	0.367291278	0.224981222	0.05717194	0.059207396
FBgn0033065	168.8260936	1	Cyp6w1	0.088737167	0.022215507	0.016023948	0.012683544
FBgn0037882	168.471414	1	CG17187	0.041459806	0.018990895	0.023443424	0.098111026
FBgn0261632	168.3406261	1	lncRNA:CR42715	0.040782587	0.031487069	0.002989969	0.006384998
FBgn0035209	167.6691695	1	msd1	0.508379223	0.142869588	0.088686259	0.071386748
FBgn0052594	167.5841629	1	be	0.693241359	0.843758061	0.612286242	1.841102208
FBgn0013771	167.4424977	1	Cyp6a9	0.059420449	0.059099609	0.018163331	0.062758199
FBgn0265652	167.0616053	1	lncRNA:CR44459	0.079806104	0.060517377	0.011446149	0.037595027
FBgn0001226	166.7665634	1	Hsp27	1.189117045	0.489559526	0.359828946	0.115716775
FBgn0025683	166.4767379	1	CG3164	2.409304247	1.837071915	0.544036552	0.70919937
FBgn0087021	164.9346059	1	Spc25	0.230239777	0.072977654	0.043640096	0.012454049
FBgn0265059	164.8350195	1	lncRNA:CR44170	0.014428718	0.054193337	0.010335069	0.074156046
FBgn0031688	164.7020098	1	Cyp28d2	0.020295755	0.034683595	0.004243348	0.007138024
FBgn0032639	164.2912953	1	CG18563	0.048703259	0.051686968	0.038043865	0.183829286
FBgn0001250	163.9176441	1	if	0.027542501	0.171121174	0.048098653	0.138767156
FBgn0286071	163.7220315	1	AdamTS-A	0.119191687	0.292910548	0.430739249	0.365215666
FBgn0011236	163.5936977	1	ken	0.256140861	0.163114679	0.037212425	0.026113995
FBgn0038877	163.2419553	1	CG3308	0.164149161	0.197335683	0.227236948	0.702605137
FBgn0266758	163.2137718	1	Esyt2	4.456313558	6.829404437	9.26450059	9.924593265
FBgn0038419	162.2717786	1	CG14879	0.019868778	0.026911195	0.154166998	0.020079765
FBgn0035432	162.1901362	1	ZnT63C	1.964090783	4.45492914	4.198478693	4.087228966
FBgn0052626	161.5204063	1	AMPdeam	0.365093686	0.379036088	1.384425519	0.472518364
FBgn0052251	160.8790846	1	Claspin	0.167572724	0.06726063	0.11797746	0.019643054
FBgn0037433	160.5554827	1	CG17919	0.009939573	0.03553424	0.003933593	0.008230317
FBgn0032785	160.298714	1	CG10026	0.090169657	0.024449435	0.006119034	0.018390719
FBgn0267849	160.2212407	1	Syx7	0.48051318	0.569158775	1.074279811	1.530458478
FBgn0063494	159.4357317	1	GstE6	1.374942681	1.191599482	0.736534827	1.245843127
FBgn0261004	159.1434066	1	asl	0.114128468	0.094682906	0.032994917	0.0065026
FBgn0031971	158.7301819	1	Sirup	0.496376142	0.476419365	0.179903323	0.402342473
FBgn0029608	158.7252543	1	CG3091	0.552436238	1.188065221	0.180515468	0.170513041
FBgn0021764	158.6382281	1	sdk	0.079552317	0.248349836	0.031659878	0.065564891
FBgn0035400	158.2686973	1	CG11537	0.64674694	0.756657191	1.324512709	2.537447701
FBgn0025814	157.1241885	1	Mgstl	0.865390381	0.547848095	0.243863137	0.291727502
FBgn0004859	156.9508362	1	ci	0.150914745	0.085301459	0.029000644	0.040260413
FBgn0031148	156.6494798	1	Cbs	0.151495489	0.087144875	0.052276048	0.019717274
FBgn0267033	156.6443625	1	mamo	1.152033977	0.650836846	0.306784895	0.103189862
FBgn0010113	156.6417465	1	hdc	2.918671695	1.957297891	0.88804096	1.901219745
FBgn0037000	156.5220272	1	ZnT77C	0.009978965	0.01327387	0.005512264	0.032473483
FBgn0032297	156.2866519	1	CG17124	0.030805722	0.116196673	0.017014324	0.028229801
FBgn0033987	156.2410942	1	ckn	0.518992108	0.184928313	0.085567139	0.113917553
FBgn0029524	156.1605921	1	CG3176	0.109104565	0.040823413	0.049919233	0.199420646
FBgn0029824	155.6151398	1	CG3726	0.212831907	0.208725122	0.053939693	0.073078229
FBgn0002533	155.5775968	1	Lcp2	0.092731289	0.015702603	0.018560153	0.007616765
FBgn0250907	155.210555	1	Cht10	0.011411695	0.009713989	0.011385332	0.003280764
FBgn0284442	154.9832996	1	Mcm3	0.207325946	0.102233546	0.074828688	0.032531653
FBgn0035438	154.8897881	1	PHGPx	2.663383767	2.637287518	1.244595831	2.360278075
FBgn0034670	154.6492027	1	CG13488	0.030607302	0.011891645	0.006678645	0.012492188
FBgn0010415	154.5406376	1	Sdc	0.471878075	0.384374621	0.153228961	0.692849306
FBgn0035976	154.3582013	1	PGRP-LC	0.584163009	0.349199996	0.12501067	0.292956567
FBgn0024361	153.5278873	1	Tsp2A	0.073711936	0.132458007	0.25599029	0.22095437
FBgn0035877	153.0423256	1	CG7083	0.127397117	0.13555051	0.059721142	0.180875242
FBgn0013765	152.9350815	1	cnn	0.648446627	0.889298465	1.400675705	2.221729934
FBgn0000723	152.8798072	1	FER	1.156803913	2.154994382	2.537743428	4.238858241
FBgn0032821	152.4913216	1	CdGAPr	0.173571214	0.16435811	0.351746934	0.848584677
FBgn0038353	152.4699287	1	CG5399	0.735445073	1.528961472	0.125655603	0.145179612
FBgn0031401	152.3136461	1	papi	0.066776823	0.025288169	0.009911907	0.00480066
FBgn0001149	151.4895284	1	GstD1	12.01764696	14.28489256	22.54365038	26.17509299
FBgn0039593	151.2387996	1	Sid	0.190289534	0.212320152	0.095913671	0.018973895
FBgn0002531	150.9954064	1	Lcp1	0.060907721	0.014957814	0.010407827	0.011300289
FBgn0004198	150.8730286	1	ct	2.599830092	2.441722701	2.537335096	0.772852456
FBgn0284257	150.485751	1	Ttd14	0.413326817	0.355642804	0.528943827	1.430172666
FBgn0284408	150.0855622	1	trol	0.330522527	0.045178218	0.060921967	0.059260638
FBgn0032050	149.8529688	1	CG13096	0.561582981	0.339609267	0.423220953	0.075181499
FBgn0264785	149.7910507	1	Hph	0.16003997	0.147387997	0.315681994	0.591968761
FBgn0015222	149.6750985	1	Fer1HCH	5.088954598	3.331001327	2.086558804	2.753293803
FBgn0003502	149.550701	1	Btk29A	0.386484136	0.110378304	0.050599716	0.032033253
FBgn0002873	149.5244878	1	mud	0.599440722	0.226314387	0.07820231	0.046601343
FBgn0035743	149.2592277	1	Acbp6	0.007178854	0.001854431	0.022134842	0.021514428
FBgn0035346	148.5117647	1	CG1146	0.078385249	0.121260212	0.018532521	0.007291385
FBgn0024321	147.956562	1	NK7.1	0.205731366	0.334320981	0.539195059	1.175331638
FBgn0015371	147.6512206	1	chn	0.358227889	0.40041952	0.118422409	0.041108129
FBgn0262716	147.5192246	1	Arp3	1.969275642	3.744730936	3.839007943	4.099178223
FBgn0086450	147.2581657	1	su(r)	0.476841382	0.431522128	0.20958096	0.586671429
FBgn0283741	146.8952831	1	prage	0.519975668	1.312542214	1.491490005	1.460012705
FBgn0020445	146.4000351	1	E23	0.036203292	0.050035095	0.131580948	0.168181955
FBgn0085484	146.3123193	1	Pdxk	0.229760978	0.181668291	0.04494092	0.05923017
FBgn0085453	146.2283576	1	Mthfs	0.183990706	0.138148039	0.173971564	0.454416256
FBgn0030745	146.2030012	1	CG4239	0.238381745	0.116104245	0.05680806	0.078069893
FBgn0041182	146.1506177	1	Tep2	0.569891034	0.843472035	1.213704091	2.074793032
FBgn0264693	145.9954096	1	ens	0.75302672	0.924162724	1.6727326	2.841745327
FBgn0041789	145.952581	1	Pax	1.188881379	2.059451629	2.481480906	4.010221121
FBgn0023525	145.9171499	1	CG3191	0.069380667	0.159470716	0.033624391	0.030100788
FBgn0083972	145.8658489	1	CG34136	0.014651426	0.047783317	0.01268805	0.051892155
FBgn0029766	145.7380006	1	CG15784	0.302410797	0.166447738	0.126941127	0.254114718
FBgn0024912	145.5433418	1	agt	0.134982391	0.045628831	0.025256316	0.021704765
FBgn0031981	145.4224318	1	Megf8	0.096063077	0.084548642	0.055340066	0.184596632
FBgn0042094	145.3138976	1	Adk3	0.114526976	0.047435255	0.03038641	0.03550739
FBgn0034718	144.9552212	1	wdp	0.226599251	0.088069385	0.033625637	0.023064301
FBgn0028396	144.6477928	1	TotA	0.038132709	0.063576911	0.065890643	0.01242971
FBgn0034894	144.5098186	1	sigmar	1.739280649	2.594592467	3.411274323	5.889311016
FBgn0263415	144.4995194	1	lncRNA:CR43461	0.009661289	0.013961144	0.004815165	0.041622794
FBgn0087007	144.4455453	1	bbg	0.010378117	0.008932736	0.00691953	0.021984905
FBgn0051038	143.8644491	1	CG31038	0.00693634	0.006628537	0.007429444	0.080662332
FBgn0010768	143.7357483	1	sqz	0.164325903	0.205076316	0.428977464	0.530049244
FBgn0037552	143.6412261	1	CG7800	0.287081471	0.141592501	0.069795585	0.036574651
FBgn0032235	143.5552885	1	CG5096	0.029887066	0.022070533	0.177546684	0.068994107
FBgn0022893	143.5182799	1	Df31	5.227370052	2.173220364	2.227445975	1.243234367
FBgn0260499	142.9587185	1	qvr	0.0618085	0.083529115	0.040279973	0.146662971
FBgn0030091	142.836089	1	CG7065	0.082872753	0.023970538	0.031254141	0.050288303
FBgn0038744	142.505948	1	CG4733	0.075248886	0.112558615	0.222456353	0.267963765
FBgn0037906	142.3378518	1	PGRP-LB	0.074854693	0.030878113	0.066002241	0.11596188
FBgn0013675	142.3265526	1	COX2	33.21891772	32.83147482	42.73480174	32.00070062
FBgn0032668	142.0029731	1	CG17681	0.049184072	0.032389584	0.180086261	0.192955184
FBgn0260400	141.9199104	1	elav	0.103246209	0.064993402	0.03682216	0.206845853
FBgn0038903	141.8991417	1	RpI12	0.091661849	0.081957418	0.053856553	0.010461558
FBgn0053181	141.5905737	1	CG33181	0.088388856	0.025238203	0.012967315	0.039716798
FBgn0030340	141.4821707	1	CG15740	0.280615445	1.106995794	0.132624144	0.097926514
FBgn0034299	141.2169807	1	CG5757	0.163914958	0.047352473	0.077189948	0.013392865
FBgn0250837	140.833958	1	dUTPase	2.067422491	0.792730098	0.712913606	0.247252732
FBgn0035917	140.7860084	1	Zasp66	0.064577	0.026634509	0.00840204	0.017911824
FBgn0032202	140.5784561	1	REPTOR-BP	0.386786614	0.262778548	0.126522564	0.261342411
FBgn0051092	140.5549581	1	LpR2	3.065341107	1.403568351	1.271747941	0.962849648
FBgn0040395	140.5172192	1	Unc-76	0.529021831	0.910729059	0.597202174	1.743665131
FBgn0031296	140.503272	1	CG4415	0.00879722	0.003132821	0.004221252	0.001646517
FBgn0040837	140.4105432	1	CG8620	0.740499494	0.653396874	0.862133231	0.313502418
FBgn0000405	140.2929575	1	CycB	0.43418274	0.128456791	0.051882071	0.034750545
FBgn0283461	139.8534885	1	Drs	0.653319035	0.513095765	0.118323967	0.410066998
FBgn0261556	139.8005812	1	CG42674	1.233872104	1.720172195	0.437174626	0.191811635
FBgn0000635	139.758099	1	Fas2	0.020486791	0.09536727	0.005472786	0.03129844
FBgn0069056	139.7181586	1	CG33226	0.35940261	1.141873129	0.413257278	0.570073698
FBgn0031012	139.5197634	1	CG8051	0.191977859	0.240221725	0.276721012	0.698959888
FBgn0053462	139.4990752	1	CG33462	0.26424375	0.292799588	0.326722756	0.101035198
FBgn0033756	139.3578206	1	CG17760	1.560375742	3.160957318	3.410729003	3.761908929
FBgn0013674	139.2408625	1	COX1	45.13382683	44.86055715	55.25426812	44.86205516
FBgn0011704	138.6941671	1	RnrS	0.477076615	0.276052797	0.388665518	0.11129202
FBgn0030286	137.8595002	1	Gapvd1	0.120892873	0.133662551	0.461294918	0.622002199
FBgn0259178	137.8126963	1	5PtaseI	0.268058969	0.617319699	0.872018303	1.060479832
FBgn0020653	137.6086157	1	Trxr-1	2.428595941	2.57536719	2.688718564	5.844758846
FBgn0010300	137.3933053	1	brat	0.541053435	0.346847877	0.142649927	0.078250797
FBgn0034897	137.3218027	1	Sesn	0.344956717	0.14116381	0.038230861	0.156498556
FBgn0038595	137.2584852	1	CG7142	0.056705717	0.335911403	0.026048606	0.075093187
FBgn0039680	137.0469627	1	Cap-D2	0.196750173	0.089225816	0.03691884	0.015785797
FBgn0038842	136.8811336	1	hdly	3.327246288	4.84447023	6.716824305	6.011176512
FBgn0025621	136.8792336	1	CG16989	0.256847315	0.293071188	0.366770366	0.87963888
FBgn0035049	136.8755716	1	Mmp1	0.818263723	3.191653631	0.815379463	2.3320207
FBgn0033875	136.8423395	1	CG6357	0.085405444	0.155323672	0.048500805	0.21106097
FBgn0039827	136.6856645	1	CG1544	0.154458477	0.139158082	0.051368257	0.062361009
FBgn0002868	136.6017273	1	MtnA	5.609442869	4.847414009	17.15890804	11.25161907
FBgn0032810	136.3370788	1	CG13077	0.010478529	0.005057229	0.008967391	0.001390108
FBgn0034142	136.0934511	1	CG8306	0.60057521	0.505748704	0.173203043	0.244090214
FBgn0038250	135.9446855	1	CG3505	1.367980551	0.621656854	0.398636284	0.184856544
FBgn0004381	135.2638798	1	Klp68D	0.151031793	0.162501234	0.423662791	0.539901515
FBgn0243516	135.2637195	1	Vrp1	1.166511239	4.538943335	0.959335987	1.270960244
FBgn0014029	134.8772628	1	Sep-02	1.849897417	2.800910347	2.894460823	5.29449797
FBgn0259734	134.4472088	1	Nost	0.05743798	0.113563466	0.16533897	0.384724213
FBgn0002733	134.2281693	1	E(spl)mbeta-HLH	0.621805717	0.229615006	0.15490395	0.085839843
FBgn0037076	134.1673038	1	ebd2	0.055213777	0.162125068	0.123323745	0.116465439
FBgn0261258	133.9653484	1	rgn	0.312783434	0.832918855	0.979362855	0.500774655
FBgn0036126	133.8896545	1	Irbp18	0.10967216	0.115915964	0.076236689	0.218001447
FBgn0033741	133.8703561	1	CG8545	0.279926782	0.141040932	0.194480517	0.04638396
FBgn0031285	133.8681935	1	CG3662	0.203851735	0.103389804	0.136148529	0.389893291
FBgn0030521	133.5820977	1	CtsB1	5.235769634	4.260470204	2.216513161	1.768327673
FBgn0037853	133.5765085	1	CG14696	0.083534716	0.039426445	0.02463757	0.020114485
FBgn0040285	133.5322523	1	Scamp	2.993299942	5.20216281	4.986490729	7.905348545
FBgn0053459	133.446767	1	CG33459	0.126660483	0.081587815	0.203064825	0.030986669
FBgn0011259	133.356664	1	Sema1a	0.044049381	0.023326145	0.020874256	0.071153468
FBgn0085360	133.2595707	1	CG34331	1.203394028	0.951178505	0.431003938	0.29585357
FBgn0003205	133.2475238	1	Ras85D	2.862013548	4.267335082	4.81746889	7.089569096
FBgn0051075	133.246103	1	CG31075	2.346645798	1.996859831	0.72268091	0.419542663
FBgn0039776	133.2434362	1	PH4alphaEFB	2.807662773	1.744190309	0.724005278	0.579359858
FBgn0034098	133.0819523	1	krimp	0.033424459	0.032217322	0.012093433	0.008028997
FBgn0010039	132.950058	1	GstD3	1.000596332	1.069093433	0.872768879	1.814936327
FBgn0024920	132.691117	1	Ts	0.474790413	0.266755179	0.25313345	0.065049383
FBgn0037617	132.6771284	1	nom	0.149542905	0.069913911	0.036361244	0.060802488
FBgn0035761	132.5429953	1	RhoGEF4	0.065721139	0.01940507	0.0084066	0.003569566
FBgn0000064	132.5096059	1	Ald1	1.839221626	1.103151475	1.869605226	3.709040015
FBgn0032935	132.4439103	1	Atg18b	0.084781363	0.153783496	0.289639695	0.457770427
FBgn0263773	132.3234812	1	fok	0.299223972	0.228723539	0.246284502	0.423103587
FBgn0001961	132.2829908	1	Arpc1	8.290785779	12.01005031	12.64169684	16.04477641
FBgn0265045	131.7628882	1	Strn-Mlck	0.04662864	0.15404209	0.030675661	0.042378342
FBgn0025549	131.7066329	1	unc-119	0.134638605	0.113500034	0.095381561	0.27573391
FBgn0264478	131.2682951	1	CG43886	0.105617201	0.038545418	0.033487289	0.115005479
FBgn0052195	131.2398457	1	CG32195	0.034459004	0.013551685	0.004266649	0.050809485
FBgn0033928	131.0806961	1	Arc2	0.410736731	0.473839792	1.069063056	0.923359682
FBgn0001186	131.0195515	1	Hex-A	0.420727429	0.225856954	0.218213846	0.685511083
FBgn0050085	130.7374242	1	Rif1	0.213469161	0.090591856	0.122686586	0.045185588
FBgn0023000	130.4320663	1	mth	0.273054345	0.407454586	0.163222714	0.485416653
FBgn0040071	130.42478	1	tara	0.200170291	0.352609326	0.206888373	0.02287442
FBgn0033725	130.4235841	1	Cpr49Ac	0.888211285	0.585127575	0.113224243	0.085376357
FBgn0052512	130.314202	1	CG32512	0.018634557	0.052739975	0.012613025	0.04689693
FBgn0001086	130.2579182	1	fzy	0.432910368	0.113786916	0.071685662	0.02984405
FBgn0033782	130.1816625	1	sug	0.13116509	0.060916847	0.029101097	0.025761363
FBgn0040373	129.778545	1	CG3038	0.057525301	0.062033479	0.039625561	0.010811131
FBgn0031998	129.7693132	1	SLC5A11	0.069904929	0.034074349	0.013474405	0.011670443
FBgn0261862	129.6619126	1	whd	0.609342017	0.665047559	0.195880833	0.101646165
FBgn0038074	129.6212491	1	Gnmt	0.018419986	0.018964946	0.010126449	0.030653262
FBgn0034915	129.5251363	1	eIF6	0.594540851	0.379004498	0.381642538	0.09801311
FBgn0035496	129.2712796	1	CG14990	0.098875436	0.028734422	0.04490908	0.006507726
FBgn0039109	129.2108024	1	CG10365	0.115914033	0.05307644	0.006909202	0.006892661
FBgn0037465	129.1841749	1	CG1105	0.473665389	0.594222009	0.867497551	1.436688826
FBgn0085465	129.0294624	1	CG34436	0.205447942	0.198570541	0.040747045	0.020981044
FBgn0010406	128.9907994	1	RNaseX25	0.439068008	0.634370044	0.809131429	1.547844308
FBgn0040070	128.9717493	1	Trx-2	6.630316191	6.521537788	3.379357329	6.634366791
FBgn0033554	128.8393607	1	Lsm10	0.079466351	0.040793788	0.022714122	0.014368451
FBgn0041188	128.7099328	1	Atx2	1.297808498	2.464767303	3.090337255	3.689672251
FBgn0028397	128.4438665	1	Tob	0.05070872	0.021273799	0.007825282	0.022027708
FBgn0032253	128.4165464	1	LManI	0.362181077	0.153770474	0.123772107	0.059406404
FBgn0028543	128.3403616	1	NimB2	0.309101933	0.157079011	0.11333211	0.361515838
FBgn0033483	128.2380668	1	egr	0.363459138	0.372135512	0.28237419	0.416336648
FBgn0027348	128.1052381	1	bgm	0.03695221	0.046021345	0.020388972	0.040608285
FBgn0030484	127.9357479	1	GstT4	0.035783006	0.028050559	0.006088422	0.009595251
FBgn0052181	127.7695224	1	CG32181	0.009290212	0.012527631	0.032077445	0.076858751
FBgn0032699	127.6231404	1	CG10383	0.205595055	0.2788395	0.237397389	0.389321836
FBgn0259876	127.2746086	1	Cap-G	0.441525987	0.133163605	0.074026022	0.077764887
FBgn0032290	127.2697246	1	CG6443	0.073068814	0.062621483	0.098649769	0.101237083
FBgn0051523	126.9552699	1	CG31523	1.070640881	2.680834331	0.986741316	0.610481043
FBgn0038608	126.9550846	1	WRNexo	0.138386549	0.060261264	0.083565539	0.009947972
FBgn0027280	126.8117361	1	l(1)G0193	0.786993417	0.657105135	0.18534828	0.387008223
FBgn0041094	126.7940277	1	scyl	0.887937814	0.88536208	0.192015182	0.271318448
FBgn0001104	126.7393508	1	Galphai	2.027586995	4.278096979	3.808408351	4.029396734
FBgn0034179	126.6573896	1	CG6805	0.179633737	0.038650185	0.025320949	0.036945511
FBgn0005655	126.5020562	1	PCNA	0.964420187	0.57108954	0.564898107	0.178100622
FBgn0262567	126.3279139	1	CG43107	0.045896538	0.06968854	0.11752771	0.163813552
FBgn0011692	126.2936756	1	pav	0.337234803	0.090802897	0.044455434	0.018562594
FBgn0015025	126.2802277	1	CkIIalpha-i1	0.016823501	0.027985876	0.00365341	0.019617649
FBgn0053542	126.2377861	1	upd3	0.097935427	0.395338252	0.432234552	0.186657665
FBgn0035640	126.1597173	1	mad2	0.282996196	0.112223757	0.073450161	0.034574858
FBgn0039908	126.1283097	1	Asator	0.159387845	0.112777322	0.201188411	0.693468604
FBgn0011824	125.9281689	1	CG4038	1.11539824	0.76951237	0.788707028	0.159894015
FBgn0030141	125.8995095	1	Gga	0.285135986	0.389155976	0.54460808	1.123487285
FBgn0001624	125.7276905	1	dlg1	0.88301135	0.930402925	1.655319745	2.220898882
FBgn0020633	125.5126891	1	Mcm7	0.481765222	0.254155064	0.267851313	0.072731042
FBgn0002989	125.3358338	1	okr	0.060093527	0.084532049	0.041976921	0.149063867
FBgn0086532	125.3299404	1	Spt-I	1.334166187	2.349388976	2.588155052	2.357302917
FBgn0053558	125.3115497	1	mim	0.498138562	0.802433966	0.126549112	0.187454884
FBgn0260795	125.1355593	1	NaPi-III	0.040918164	0.065175183	0.081211237	0.029295539
FBgn0000278	125.063034	1	CecB	0.19654085	0.40005968	0.205820828	0.106381778
FBgn0027356	124.7969439	1	Amph	0.062867058	0.02122713	0.016908218	0.082348757
FBgn0264975	124.7729171	1	Nrg	1.834535321	1.678290296	1.737949882	2.261644701
FBgn0033387	124.5064834	1	CG8008	0.114318324	0.046582317	0.014966255	0.024414436
FBgn0036480	124.4157777	1	Cep135	0.119793959	0.061512443	0.027473957	0.014902578
FBgn0004652	124.3448893	1	fru	0.34674645	0.173731437	0.145463248	0.056366859
FBgn0032390	124.2752143	1	dgt2	0.301255871	0.135655963	0.086716436	0.026497664
FBgn0001296	124.0968781	1	kar	0.378328149	0.078085126	0.040876842	0.039206655
FBgn0000097	123.875662	1	aop	0.980048218	0.855280009	0.50133589	1.422655864
FBgn0017577	123.8625278	1	Mcm5	0.231236267	0.138183317	0.143706326	0.028827686
FBgn0032147	123.6488726	1	IP3K1	0.423044705	0.256698556	0.196454395	0.055854355
FBgn0001218	123.4321769	1	Hsc70-3	10.82764725	17.27126061	14.18938525	8.45469365
FBgn0029881	123.3038828	1	pigs	0.576134064	0.64146679	0.185988436	0.504602511
FBgn0035975	122.9340941	1	PGRP-LA	0.216647285	0.29198567	0.246649016	0.527819839
FBgn0002645	122.5085411	1	Map205	2.852614055	4.51875044	4.296744129	6.515148183
FBgn0051826	122.5051249	1	CG31826	0.010823564	-0.001884341	0.000838931	-0.000586606
FBgn0022774	122.2389093	1	Oat	0.850124012	0.647659531	0.20472877	0.261998942
FBgn0039056	121.9575812	1	CenB1A	0.696995111	1.596323828	1.522947091	2.375942078
FBgn0036551	121.836993	1	CG17029	0.198510255	0.190432093	0.046158006	0.027797447
FBgn0261393	121.8188661	1	alpha-Est5	-0.001545625	-0.001830311	0.001478347	0.000571899
FBgn0034614	121.6600383	1	CG9752	0.315514165	0.162226863	0.15420473	0.039571072
FBgn0039800	121.5901304	1	Npc2g	0.273320194	0.200199359	0.062678208	0.023468206
FBgn0263855	121.4414694	1	BubR1	0.249607785	0.084555268	0.044289363	0.021227146
FBgn0013272	121.3877189	1	Gp150	0.402033514	0.94263956	0.989158429	1.425879293
FBgn0037647	121.3474116	1	RagA-B	0.559410863	0.829123595	0.906612787	1.614514128
FBgn0029118	121.271942	1	ScsbetaG	0.61305457	0.422776008	0.229506846	0.071302513
FBgn0053087	121.1112793	1	LRP1	0.052739189	0.152677185	0.145108083	0.328698982
FBgn0040153	121.0426694	1	l(1)G0469	0.054842109	0.039629747	0.012872703	0.038135137
FBgn0034724	120.9659474	1	babos	0.09367659	0.453124751	0.121160744	0.218368536
FBgn0034569	120.9235009	1	dgt3	0.241141268	0.104053546	0.047622047	0.035827644
FBgn0086365	120.7190441	1	Orct2	0.184172868	0.116653096	0.063539922	0.026521798
FBgn0030400	120.6760317	1	Pits	0.660244959	1.068183221	1.996375195	1.712483124
FBgn0040064	120.5589033	1	yip2	1.38900378	1.235314278	0.4325044	0.695901078
FBgn0010041	120.3041532	1	GstD5	0.036331298	0.056245595	0.015106674	0.052931025
FBgn0038420	120.1719665	1	CG10311	0.005673861	0.019433772	0.010009468	0.025445847
FBgn0036805	120.1278736	1	Chmp1	1.537795589	2.647037215	2.281765538	3.848063324
FBgn0030500	120.0799835	1	Ndc80	0.187383699	0.06470254	0.027874628	0.026363116
FBgn0020270	119.6434421	1	mre11	0.210139061	0.117541185	0.057539101	0.040951869
FBgn0004133	119.6417865	1	blow	0.202849445	0.222693341	0.055397774	0.044058484
FBgn0029996	119.4529	1	UbcE2H	0.705773613	0.6514562	0.72204877	1.72300592
FBgn0035452	119.3366266	1	CG10359	0.578340694	1.904664782	0.777919452	0.698356548
FBgn0010470	119.0484077	1	Fkbp14	1.455445615	1.126210829	0.745791082	0.187432489
FBgn0026090	118.9517435	1	CG14812	0.661862937	0.702241997	0.577546995	1.353142622
FBgn0051361	118.5200129	1	dpr17	0.083479713	0.3325976	0.139729854	0.031385564
FBgn0260486	118.1729454	1	Ziz	0.181432733	0.131850298	0.094941566	0.094879216
FBgn0037222	118.1614768	1	CG14642	0.210449982	0.214378527	0.042508896	0.071203715
FBgn0014906	117.8235505	1	Hydr2	0.559613124	0.889784695	0.973923251	1.655509406
FBgn0262101	117.5978691	1	CG42854	0.004856123	0.005196605	0.006421046	0.000335548
FBgn0050389	117.3807151	1	CG30389	0.28045218	0.341093845	0.603332877	0.912524218
FBgn0031957	117.1666729	1	TwdlE	0.074948872	0.106034769	0.047345389	0.021540926
FBgn0025641	116.7902154	1	DAAM	0.430958768	0.795065969	1.270176266	1.25089671
FBgn0004861	116.7510129	1	ph-p	0.150779623	0.072863805	0.036101535	0.079553494
FBgn0032620	116.5620609	1	CG12288	0.099321949	0.026149508	0.045939074	0.012791214
FBgn0040260	116.5260784	1	Ugt37D1	0.147033324	0.041876229	0.025451135	0.071371513
FBgn0020376	116.5145527	1	Sr-CIII	0.164571765	0.240891585	0.713918073	0.298484479
FBgn0033458	116.5058551	1	CG18446	0.128371216	0.027493591	0.009268427	0.011289947
FBgn0004584	116.4545701	1	Rrp1	0.755693638	0.404315615	0.199820421	0.120598078
FBgn0039026	116.3893415	1	CG7029	0.470550752	0.94623248	0.923622752	1.7957696
FBgn0030482	116.3758349	1	CG1673	0.181907161	0.068686859	0.035609957	0.016549797
FBgn0265174	116.3364801	1	PIG-V	0.485638278	0.912170084	1.298341697	1.849869916
FBgn0002719	115.8899694	1	Men	0.985035648	0.895083844	0.522826977	1.101653518
FBgn0036896	115.5974501	1	wnd	0.233141898	0.429040726	0.79247178	0.300854833
FBgn0039561	115.5025918	1	mfrn	0.251206089	0.373979164	0.233802526	0.50411771
FBgn0261563	115.4889829	1	wb	0.104321155	0.156835955	0.292954591	0.414838918
FBgn0036688	115.4299357	1	Fit2	0.095090907	0.115825689	0.272005988	0.328036299
FBgn0085446	115.4226207	1	CG34417	0.106196066	0.14305044	0.045788882	0.08863034
FBgn0004598	115.2842262	1	Fur2	0.247436141	0.2402205	0.106727958	0.041352865
FBgn0053653	115.0890449	1	Cadps	0.083082461	0.060977572	0.035873183	0.086823707
FBgn0036837	114.9219538	1	CG18135	0.192667929	0.156847899	0.081567193	0.183915165
FBgn0265194	114.6252727	1	Trpm	0.117588028	0.091925964	0.049633686	0.278889707
FBgn0001122	114.4086288	1	Galphao	0.639464069	0.711822226	0.665900521	1.808588506
FBgn0260945	113.9357521	1	Atg1	0.359551334	0.416481915	0.621676174	1.152358604
FBgn0000721	113.889532	1	for	0.51849609	0.432512955	0.300705492	0.710816335
FBgn0259682	113.769927	1	Jabba	0.018062321	0.032851179	0.005761736	0.023382654
FBgn0036501	113.5045961	1	CG7272	0.163940199	0.071819576	0.035168068	0.036219384
FBgn0027558	113.2169037	1	Pgant3	0.20517498	0.35329053	0.671166666	0.630702241
FBgn0261445	113.1598758	1	sgl	0.541690515	0.251594517	0.177327938	0.087144926
FBgn0023407	113.1305565	1	B4	0.314713232	0.577443517	0.79875761	0.89679799
FBgn0016930	112.9520558	1	Dyrk2	0.658473994	0.370280362	0.183083979	0.294373617
FBgn0028430	112.9016709	1	He	7.801681009	10.92107205	11.76847954	14.16939575
FBgn0038658	112.8869318	1	CG14292	0.037209262	0.050238864	0.125217097	0.055672765
FBgn0038115	112.7476188	1	CG7966	0.317793125	0.193228285	0.07293849	0.158622564
FBgn0266446	112.6586176	1	CG45076	0.024166899	0.087262661	0.041499906	0.122044677
FBgn0004362	112.5067122	1	HmgD	2.727070765	1.413845535	1.592878302	0.537527564
FBgn0040236	112.3849782	1	c11.1	0.387273335	0.564173939	0.463519252	1.150032174
FBgn0037723	112.3334362	1	SpdS	0.381209058	0.556725701	1.137132818	0.476182187
FBgn0037541	112.2239682	1	CG2747	0.36036446	0.751524865	0.636566837	1.538837235
FBgn0264326	112.1020139	1	DNApol-epsilon255	0.132779587	0.104857054	0.064674116	0.023157953
FBgn0015270	111.8790737	1	Orc2	0.089299472	0.041999788	0.034090499	0.015418702
FBgn0031738	111.8485965	1	CG9171	0.667717787	0.229052659	0.141785077	0.122017885
FBgn0050344	111.8237625	1	CG30344	1.416155881	0.910045164	0.386367365	0.361472991
FBgn0014009	111.7145517	1	Rab2	1.566541968	2.119974403	2.039827313	3.967321001
FBgn0026593	111.5144737	1	CG5707	0.028118622	0.021151551	0.014167625	0.02306196
FBgn0086558	111.3414063	1	Ubi-p5E	3.337131728	4.57010738	3.315705326	6.304640721
FBgn0265068	111.3291049	1	asRNA:CR44179	0.037263652	0.049442201	0.071721798	0.162175294
FBgn0038149	111.2550445	1	GILT1	0.559942121	0.660276271	0.352421244	1.07905521
FBgn0042710	111.1704572	1	Hex-t2	0.010615697	0.008058677	0.030889801	0.016449319
FBgn0032670	111.0574707	1	CG5783	0.165788463	0.260161338	0.225378452	0.35225789
FBgn0003514	111.0180091	1	sqh	4.408521445	5.929642416	5.931431801	8.591800411
FBgn0262815	110.7978505	1	CR43186	0.036008397	0.051680111	0.048691552	0.065856543
FBgn0261802	110.7696839	1	CG42748	0.649437214	0.389069975	0.141110906	0.145578984
FBgn0025620	110.6861399	1	CG13360	0.072344088	0.056743148	0.025520449	0.056888852
FBgn0029820	110.5954731	1	CG16721	0.234076231	0.255403974	0.157461896	0.381734851
FBgn0052667	110.2862247	1	ssp7	0.046852572	0.016820416	0.013498859	0.02189159
FBgn0033890	110.2316571	1	Ctf4	0.075217579	0.040965473	0.063270464	0.01422491
FBgn0029823	110.2294419	1	Shmt	0.444665561	0.249425939	0.344198888	0.07368968
FBgn0033978	109.9713744	1	Cyp6a23	0.456745335	0.318982821	0.15580592	0.064936712
FBgn0025697	109.9206091	1	santa-maria	0.015707144	0.011798365	0.208905341	0.033179357
FBgn0028499	109.9091733	1	CG7985	0.030939478	0.016037554	0.006161406	0.006328638
FBgn0023549	109.8939406	1	Mct1	0.16449838	0.093483444	0.019593785	0.098917229
FBgn0029924	109.8797723	1	CG4586	0.037268308	0.01657977	0.007847284	0.007201067
FBgn0041604	109.807089	1	dlp	0.018380474	0.007364617	-0.001237528	0.001953953
FBgn0085423	109.7867353	1	GramD1B	0.188830787	0.456065959	0.64520005	0.446115439
FBgn0013672	109.6326443	1	ATP6	28.07157343	26.4520794	36.03500721	25.11691906
FBgn0262167	109.5881352	1	ana1	0.087013845	0.025327471	0.028760599	0.01021577
FBgn0017551	109.2151137	1	Rca1	0.097607289	0.07637123	0.039107986	0.067697505
FBgn0003997	109.1529972	1	hid	0.04410821	0.006688053	0.01176535	0.020309208
FBgn0261444	109.0706314	1	CG3638	1.025613709	0.876139551	0.255454684	0.238760134
FBgn0039886	108.9882049	1	CG2003	0.726698622	1.025953808	0.516777059	0.264707438
FBgn0026570	108.7573516	1	CG5704	0.139822437	0.168822821	0.217856061	0.500084686
FBgn0263200	108.65535	1	Galt	0.408571832	0.27066732	0.23608345	0.064436599
FBgn0000547	108.6244067	1	ed	0.376944881	0.241708148	0.292874686	0.875428133
FBgn0261584	108.4023976	1	CG42694	0.369570235	0.21185591	0.312111217	0.109322973
FBgn0259676	108.3584829	1	DNApol-alpha60	0.056282186	0.026804685	0.035502119	0.012973801
FBgn0037810	108.1741636	1	sle	0.295867811	0.082454478	0.063174414	0.039536212
FBgn0052017	108.074411	1	CG32017	0.015321258	0.025807563	0.024674518	0.032697312
FBgn0034476	108.0156569	1	Toll-7	0.009374021	0.001551099	0.007890305	0.005827162
FBgn0266376	107.8877729	1	lncRNA:CR45018	0.556108039	0.237526852	0.178282713	0.057305375
FBgn0030510	107.7302133	1	CG12177	0.21114776	0.168909944	0.074488713	0.216853728
FBgn0010382	107.6315205	1	CycE	0.098340478	0.045748504	0.03681647	0.012509562
FBgn0038826	107.6111345	1	Syp	3.297309023	2.782995341	1.175580732	0.861559849
FBgn0260477	107.559742	1	CG30283	0.491324879	1.087639482	0.678959819	0.343217959
FBgn0036754	107.4441626	1	CG5589	0.081054511	0.026063884	0.038494535	0.016084405
FBgn0045800	107.3567982	1	Uhg1	0.071128664	0.059370749	0.045380982	0.012924746
FBgn0000414	107.2627992	1	Dab	0.170056739	0.554102733	0.503092763	0.443249606
FBgn0016059	107.246178	1	Sema1b	1.137094687	2.488446304	1.28989625	2.148203368
FBgn0029148	107.0217414	1	NHP2	0.521947283	0.276720205	0.354544621	0.093153828
FBgn0015391	106.7938141	1	glu	0.340609754	0.109291801	0.087676476	0.049212373
FBgn0014931	106.6367411	1	CG2678	0.065822829	0.083601992	0.205685645	0.227241765
FBgn0266186	106.5843119	1	Vamp7	4.927832294	8.395455791	6.630033825	9.665401594
FBgn0032705	106.5051981	1	Grip71	0.163017977	0.129274466	0.070420685	0.047579454
FBgn0030799	106.4628368	1	CG4872	0.155974363	0.227819408	0.388206753	0.403586318
FBgn0045852	106.183092	1	ham	0.962894995	0.759610123	1.642476567	0.495779393
FBgn0033309	105.9855403	1	Lnpk	0.743855667	1.447639081	2.026077814	2.372812709
FBgn0010388	105.9281204	1	Dro	0.173807071	0.13803327	0.163733892	0.253288133
FBgn0004380	105.8750589	1	Klp64D	0.18329281	0.289248155	0.496037457	0.552367699
FBgn0038968	105.8388881	1	CG12499	0.230190693	0.130932559	0.140315947	0.051935428
FBgn0261938	105.8363727	1	mtRNApol	0.058300006	0.014344705	0.049582089	0.029583514
FBgn0036301	105.7420865	1	CG4069	0.250532625	0.113450757	0.134428552	0.038875855
FBgn0261570	105.5814828	1	CG42684	0.532659485	1.353181666	1.259016277	1.510495543
FBgn0026196	105.5646511	1	nop5	1.174739881	0.644774742	0.779729131	0.189974821
FBgn0052982	105.5312692	1	CG32982	0.029365913	0.029021289	0.01082246	0.013651497
FBgn0266916	105.416045	1	Cenp-C	0.186566397	0.102720942	0.035277902	0.036007215
FBgn0005660	105.2702983	1	Ets21C	0.157559321	0.110087544	0.096959566	0.037356774
FBgn0041713	105.2017888	1	yellow-c	0.004716863	0.001561294	0.008558137	0.003262496
FBgn0270926	105.1250398	1	AsnS	0.46250014	0.48395316	0.307299465	0.106123646
FBgn0015929	104.9939485	1	dpa	0.287949655	0.143428858	0.129334629	0.029960217
FBgn0029737	104.856071	1	CG6903	0.647025686	0.57494097	0.833139188	1.562510132
FBgn0011762	104.6889945	1	DNApol-alpha50	0.12780619	0.063537106	0.065366469	0.014428522
FBgn0040091	104.5172511	1	Ugt317A1	0.717748064	0.380384882	0.174198277	0.106595476
FBgn0038909	104.4016335	1	CG6569	0.071798842	0.19113265	0.237148429	0.352005674
FBgn0259937	104.3493366	1	Nop60B	1.514757363	0.715186261	1.019988212	0.302205498
FBgn0051999	104.26156	1	CG31999	0.039903734	0.007615241	0.005219758	-0.001347489
FBgn0024980	103.8737668	1	Syx4	0.142202623	0.205621984	0.079001045	0.204227175
FBgn0266420	103.8071329	1	Ote	1.073179288	0.445809283	0.309379031	0.14385162
FBgn0020510	103.47758	1	Abi	0.829045189	1.517503768	1.700588248	2.287402608
FBgn0037781	103.3531738	1	Fancl	0.025249437	0.011356765	0.013991661	0.001255268
FBgn0265042	103.1725364	1	Irk1	0.061704448	0.18724994	0.327266055	0.330171157
FBgn0011703	102.9740873	1	RnrL	0.499628113	0.23663607	0.290722736	0.078183682
FBgn0028671	102.9689438	1	Vha100-1	0.865056946	1.05788633	0.983070304	1.760851462
FBgn0034232	102.8945853	1	CG4866	0.178482803	0.065064793	0.11466117	0.041962475
FBgn0002778	102.878506	1	mnd	0.413167435	0.252465392	0.542763795	0.11178144
FBgn0032105	102.8258286	1	borr	0.751441935	0.393989529	0.298347641	0.116110397
FBgn0284249	102.7865114	1	Adf1	0.302947145	0.550376335	0.888794301	0.886814234
FBgn0031190	102.5245759	1	CG12576	1.033655972	0.781274226	0.405170768	1.132521408
FBgn0000114	102.4987549	1	bru1	0.020993469	0.02132387	0.034169593	0.047129517
FBgn0050015	102.3788818	1	CG30015	0.649010144	0.651479126	0.367449751	1.006932796
FBgn0085442	102.3555751	1	NKAIN	0.72576316	1.086296989	1.437660815	2.001127971
FBgn0037518	102.3351004	1	CG2641	0.179647041	0.146888746	0.045278216	0.057466406
FBgn0004574	102.1294006	1	Rop	1.063967729	2.10746929	2.185403072	2.93370977
FBgn0034494	102.1279761	1	CG10444	0.269644793	0.365069756	0.498381443	0.559536676
FBgn0033081	102.0998917	1	geminin	0.92499524	0.442506778	0.398134606	0.214504083
FBgn0040323	102.0355235	1	GNBP1	0.071381301	0.099366879	0.051548312	0.112575588
FBgn0010313	101.9724826	1	corto	0.215148699	0.153135663	0.080083619	0.02113266
FBgn0262588	101.939312	1	CG43125	0.689041462	1.502356443	1.145804128	0.789274152
FBgn0262733	101.8913416	1	Src64B	0.201465719	0.241620418	0.344012205	0.867221365
FBgn0004635	101.8483692	1	rho	0.033525093	0.054384685	0.010534161	0.019341793
FBgn0001085	101.714848	1	fz	0.033227211	0.006263306	0.001593685	0.010202118
FBgn0022359	101.7049113	1	Sodh-2	0.304729667	0.192921317	0.156681083	0.039477
FBgn0004611	101.6758942	1	Plc21C	0.168543719	0.109738423	0.16891858	0.496266683
FBgn0086909	101.6694522	1	CG31751	0.052354176	0.022959808	0.016153766	0.031783831
FBgn0000277	101.6688335	1	CecA2	0.332227384	0.435918679	0.571060475	0.211960725
FBgn0000017	101.6678697	1	Abl	1.005611212	2.035267746	1.718832538	2.688452681
FBgn0250815	101.6665097	1	Jon65Aiv	0.007263108	0.008201474	0.000949449	0.006199089
FBgn0033382	101.6304356	1	Hydr1	0.090236247	0.07701583	0.034953159	0.025994314
FBgn0037065	101.4766657	1	CG12974	0.008110499	0.036363951	0.022302438	0.051200608
FBgn0004908	101.430256	1	Arl2	0.295095698	0.470974528	0.730895013	0.708062472
FBgn0086372	101.3576246	1	lap	0.864008637	1.366864825	1.688898294	2.252138291
FBgn0035236	101.3326263	1	CG12004	1.53800887	3.097535814	2.460273422	2.908872104
FBgn0003076	100.9214838	1	Pgm1	0.231531121	0.166401225	0.286079896	0.595663811
FBgn0259483	100.8636594	1	Mob4	0.31666034	0.441274385	0.605796556	0.91043135
FBgn0031824	100.5184479	1	CG9547	0.46592679	0.174988006	0.153849357	0.068475197
FBgn0002535	100.2988248	1	Lcp4	0.166395127	0.069492507	0.041426332	0.049696462
FBgn0026479	100.2039434	1	Drp1	0.47517206	0.771046393	1.166829677	1.334419893
FBgn0035776	100.1660735	1	CG8564	0.009919043	0.00686096	0.069544034	0.014192834
FBgn0003071	100.03308	1	Pfk	0.097719052	0.104372504	0.11720705	0.277588448
FBgn0027929	99.85569888	1	NimB1	0.54802619	0.253584505	0.183279579	0.068955829
FBgn0063649	99.83508601	1	CG6006	0.149057263	0.31146939	0.059042935	0.115253537
FBgn0016081	99.75080951	1	fry	0.301496055	0.458994533	0.314230376	0.808372374
FBgn0027552	99.68497173	1	CG10863	1.089848566	0.906792942	0.722916726	1.151382109
FBgn0025382	99.36640724	1	Rab27	0.034741276	0.012688197	0.010817499	0.005946899
FBgn0261547	99.29016026	1	Exn	0.302732486	0.323342002	0.830375958	1.085185806
FBgn0261574	99.20129838	1	kug	0.093185152	0.176874962	0.116262801	0.357937219
FBgn0036018	99.17901287	1	CG3335	0.214526835	0.102034254	0.094830199	0.02593754
FBgn0037341	99.11464591	1	CG12746	0.387520224	0.629579069	0.223533008	0.120671608
FBgn0033453	98.89277357	1	Sting	0.183695393	0.115071149	0.068855992	0.056538368
FBgn0032076	98.88463065	1	Argl	0.051308361	0.058000764	0.057396343	0.026459453
FBgn0024320	98.84051925	1	Npc1a	1.077646253	1.414607096	0.468587068	0.316161539
FBgn0025390	98.8244121	1	Mur2B	0.017309503	0.009745434	0.016718689	0.0198478
FBgn0027620	98.51238054	1	Acf	0.231644389	0.089715798	0.062837171	0.041766492
FBgn0000244	98.47530757	1	by	0.021897905	0.008398645	0.016956085	0.032777937
FBgn0046687	98.45571084	1	Tre1	0.641377618	1.49830905	1.013491501	1.705816713
FBgn0037489	98.16982972	1	CG1234	0.134181514	0.072758076	0.084680343	0.03568572
FBgn0010043	98.11814873	1	GstD7	0.071474553	0.054449117	0.049530735	0.02219943
FBgn0033204	98.06872831	1	CG2065	0.148046675	0.162354725	0.113296661	0.032818623
FBgn0260743	98.01624564	1	GC1	0.160752971	0.109298622	0.027433151	0.032293321
FBgn0033212	98.01199515	1	LRR	0.40749574	0.729907573	0.884533756	1.15389399
FBgn0033988	98.00366092	1	pcs	0.228685971	0.104557431	0.071587701	0.167631417
FBgn0035285	97.9652881	1	CG12025	0.328116666	0.424527872	0.4640685	0.922255728
FBgn0033945	97.90374258	1	CG12868	0.09312098	0.105051177	0.074018098	0.120914491
FBgn0010786	97.63421752	1	l(3)02640	0.616203322	0.504727745	0.184139287	0.106717823
FBgn0250785	97.63024296	1	vari	0.771668678	1.163118727	0.666624524	1.391151503
FBgn0035978	97.58041356	1	UGP	0.5170151	0.33784985	0.222283251	0.430698176
FBgn0037044	97.54677361	1	Pdss2	0.250804698	0.257550081	0.854221241	0.466390318
FBgn0086694	97.52794081	1	Bre1	0.407876991	0.457225924	1.116554534	1.435645289
FBgn0285991	97.29184007	1	hpRNA:CR18854	0.787617062	0.711462586	0.386691321	0.773667696
FBgn0037354	97.17417151	1	CG12171	0.619691797	0.346539345	0.296740694	0.130097404
FBgn0016926	97.1669283	1	Pino	0.130073751	0.107681315	0.093522258	0.329049138
FBgn0030839	97.08044032	1	CG5613	0.081717327	0.183778814	0.128287885	0.170050667
FBgn0024806	96.77918654	1	DIP2	0.190420348	0.235081762	0.233981441	0.514768435
FBgn0025558	96.67565191	1	CG4101	0.740331114	1.260294952	1.434777259	1.221069868
FBgn0264822	96.57205184	1	asRNA:CR44030	0.060653333	0.063286441	0.054745042	0.11700937
FBgn0036770	96.5599913	1	Prestin	0.644265684	0.889545195	0.194723962	0.415119226
FBgn0037850	96.43569734	1	CG14695	0.121839778	0.061665755	0.060533917	0.027956607
FBgn0012037	96.4133781	1	Ance	2.464959444	2.870112125	1.594091978	1.484428205
FBgn0035499	96.4100092	1	Chd64	29.78832077	36.80512957	33.25157474	35.27142495
FBgn0264273	96.34500222	1	Sema2b	0.036353494	0.06899161	0.034797375	0.083486976
FBgn0014861	96.29770774	1	Mcm2	0.332520443	0.154812609	0.157979715	0.044623243
FBgn0030452	96.27318747	1	MFS10	0.179793766	0.158810814	0.074615404	0.036952691
FBgn0052296	96.09796113	1	Mrtf	0.187597352	0.263950805	0.604687244	0.817274961
FBgn0036518	96.07714761	1	RhoGAP71E	3.133255568	6.167429434	4.418122751	5.422099585
FBgn0036043	96.04070674	1	CG8177	1.374139385	1.706315119	1.514608921	2.19767479
FBgn0024250	96.00016761	1	brk	0.022010632	0.013294316	0.005450443	0.006201384
FBgn0041184	95.93884462	1	Socs36E	0.293927962	0.283790504	0.614461971	0.190013218
FBgn0043841	95.89331907	1	vir-1	3.654876198	6.59314917	1.943998955	2.415254749
FBgn0029504	95.8478395	1	CHES-1-like	0.500900786	0.573843582	0.892059814	1.447344343
FBgn0041171	95.78375659	1	ago	0.270234929	0.34793779	0.725640552	0.965668618
FBgn0263395	95.76647596	1	hppy	0.15666783	0.216099632	0.682420361	0.841565649
FBgn0030122	95.71639682	1	Aladin	0.200710169	0.138543223	0.148084761	0.054548661
FBgn0010350	95.64631857	1	Cds	0.28712987	0.388871281	0.306308931	0.719303204
FBgn0034408	95.62992273	1	sano	0.949400039	2.081385623	0.936094611	1.036902935
FBgn0031988	95.54398911	1	CG8668	0.374489018	0.141536285	0.080377383	0.093306499
FBgn0261545	95.41220424	1	CG42663	0.393679963	0.307882882	0.962448983	1.568958838
FBgn0036309	95.40845843	1	Hip1	0.312059077	0.531959071	0.779003759	0.907184585
FBgn0083124	95.40237912	1	Uhg4	0.266272834	0.175645379	0.134685104	0.040983535
FBgn0035337	95.22041902	1	CG15877	0.143230585	0.095574013	0.134690024	0.059747881
FBgn0035425	94.89442549	1	CG17746	0.822066671	1.272574789	0.864688121	1.867823993
FBgn0032421	94.84338122	1	crok	0.55947806	0.684120252	0.527354577	1.126768103
FBgn0035811	94.82763587	1	Mcad	0.537723673	0.498029883	0.397771265	0.712406652
FBgn0000084	94.81967134	1	AnxB10	0.45964592	0.93314382	0.635239454	1.340567456
FBgn0030958	94.77254971	1	CR6900	0.33063738	0.391955942	0.363986865	0.480698926
FBgn0036053	94.70046726	1	iPLA2-VIA	0.746983497	1.417951863	1.552084312	2.740319234
FBgn0028563	94.5573683	1	sut1	0.28509366	0.402272415	0.82017942	1.000857409
FBgn0036857	94.55172297	1	Aldh7A1	0.514411088	0.245254998	0.216341393	0.086258642
FBgn0039566	94.45584903	1	CG4849	0.301824897	0.168148646	0.147917974	0.062524992
FBgn0000567	94.45316733	1	Eip74EF	0.525609329	0.341767507	0.165734566	0.373254071
FBgn0022787	94.39329431	1	Hel89B	0.386386895	0.515221676	0.426394624	0.944855092
FBgn0033159	94.37781408	1	Dscam1	0.114242418	0.205930524	0.05453809	0.193657884
FBgn0033051	94.29647325	1	Strica	0.377906728	0.512107919	0.86728364	0.773638479
FBgn0037146	94.27082275	1	CG7470	0.112095676	0.025620748	0.014944622	0.021345636
FBgn0021979	94.14503297	1	l(2)k09913	0.648024907	0.429514302	0.21817336	0.242667011
FBgn0052649	93.98351887	1	Coq8	0.176439647	0.146857765	0.209872677	0.404571942
FBgn0266409	93.95089386	1	CG45049	0.358150015	0.246033751	0.178407338	0.533963111
FBgn0005666	93.89812125	1	bt	0.059031114	0.015633733	0.0044065	0.004206539
FBgn0036522	93.69664094	1	CG7372	0.05454844	0.046866762	0.036633928	0.03223415
FBgn0044047	93.65034625	1	Ilp6	0.558165847	0.722239112	0.289298838	0.49579713
FBgn0037746	93.62719845	1	CG8478	0.324307957	0.121191402	0.048851021	0.048972016
FBgn0026620	93.40863549	1	tacc	0.736197165	1.120600098	1.537018949	1.927910526
FBgn0039737	93.36869754	1	CG7920	0.429953946	0.304014004	0.284335126	0.09840286
FBgn0013678	93.24758767	1	CYTB	20.66170738	20.21016527	26.77504456	20.42363273
FBgn0032815	93.07666142	1	CG10462	0.099866745	0.075625237	0.050491182	0.074047001
FBgn0259113	93.06667616	1	DNApol-alpha180	0.195936018	0.081522825	0.06962651	0.021970006
FBgn0036514	93.06166406	1	CG12301	0.152550309	0.088418716	0.105605045	0.02679811
FBgn0034248	93.02144478	1	CG14483	0.701047924	0.601366329	0.716400556	1.326818292
FBgn0053926	92.9335155	1	CG33926	0.058117025	0.033601491	0.024266126	0.015045702
FBgn0036353	92.75838009	1	CG10171	0.053135519	0.077075903	0.054218947	0.210771606
FBgn0004107	92.65525338	1	Cdk2	0.136714088	0.046790798	0.07487643	0.02910429
FBgn0023526	92.54900215	1	CG2865	0.435556665	0.382205432	0.315378443	0.834727813
FBgn0030608	92.49900609	1	Lsd-2	0.668238075	0.558943186	0.343633486	0.683264092
FBgn0039914	92.47334035	1	mav	0.045861674	0.005703377	0.011008773	0.030070314
FBgn0038652	92.4514954	1	CG7720	0.233109818	0.293013409	0.114992656	0.173281882
FBgn0016126	92.31744346	1	CaMKI	0.44454302	0.494718517	0.483789864	0.98186928
FBgn0037705	92.14744302	1	mura	0.463902146	0.882949456	0.579846549	1.105737572
FBgn0001168	92.13070564	1	h	1.024467804	0.58532885	0.854819921	0.306233604
FBgn0015801	91.88864154	1	Reg-5	0.708947974	0.837423239	0.767535146	1.377883577
FBgn0016032	91.87925	1	lbm	0.026485887	0.031858846	0.017991857	0.062291282
FBgn0036980	91.84842899	1	RhoBTB	0.217472956	0.126412475	0.045041069	0.087032979
FBgn0267390	91.81661206	1	dop	0.202333792	0.495818996	0.299051423	0.654400395
FBgn0014018	91.73279125	1	Rel	3.175919479	4.159833938	2.128377868	2.485957828
FBgn0011661	91.65328902	1	Moe	13.81466726	16.11512573	16.84493413	20.75123811
FBgn0028700	91.63910018	1	RfC38	0.232096394	0.110942332	0.111936072	0.044977846
FBgn0039017	91.51235187	1	CG6985	0.056888641	0.028453883	0.013086099	0.008063488
FBgn0035715	91.32512144	1	CG10103	0.771637495	1.395325489	1.261662507	1.805483581
FBgn0036298	91.31132095	1	nst	0.934387044	1.055584562	1.967320695	2.418270027
FBgn0051453	91.1463322	1	pch2	0.251312014	0.14850766	0.081353959	0.044220834
FBgn0031717	91.13501815	1	Oscillin	0.168721292	0.168234284	0.128513335	0.316770469
FBgn0050148	91.12202718	1	CG30148	0.177674777	0.395946915	0.577247893	0.675621856
FBgn0034694	91.07432458	1	Plekhm1	0.092601368	0.063373695	0.073343576	0.149175599
FBgn0000317	90.99338208	1	ck	0.045823181	0.021457887	0.018586398	0.010563385
FBgn0027578	90.98117265	1	Nepl21	0.224581059	0.147738947	0.057791586	0.07241854
FBgn0027843	90.84672518	1	CAH2	0.022755016	0.033204314	0.024161291	0.021848714
FBgn0036007	90.82115741	1	path	0.468669337	0.899967477	0.331931731	0.267412441
FBgn0003328	90.77617047	1	NA	0.019496366	0.040276677	0.027533	0.042934214
FBgn0004108	90.67755067	1	Nrt	0.149403736	0.095817791	0.112851921	0.036739971
FBgn0030955	90.55328447	1	CG6891	8.781655411	14.99958867	11.19200766	13.82236641
FBgn0085478	90.47057056	1	CG34449	0.810283852	1.459716296	1.431778963	1.7951731
FBgn0037094	90.39587168	1	CG7611	0.482090063	0.54628556	0.839100655	1.109201152
FBgn0086912	90.38181929	1	mbm	0.237650752	0.168033523	0.159927537	0.040623448
FBgn0039714	90.29298227	1	Zip99C	0.454945422	0.296368493	0.126279519	0.190102678
FBgn0038058	90.27577991	1	CG5608	0.274867895	0.449027777	0.438789299	0.510988561
FBgn0040271	90.25866666	1	Sulf1	0.042928033	0.252930732	0.067095557	0.113823122
FBgn0030067	90.2478339	1	Rbm13	0.357983714	0.182582479	0.207563766	0.064611378
FBgn0045842	90.22730302	1	yuri	0.232981973	0.331193747	0.81375352	0.985161542
FBgn0031896	90.19456817	1	CG4502	0.192399971	0.153077463	0.053351085	0.065024587
FBgn0034010	90.12043363	1	CG8157	5.188359044	2.002343118	3.767660165	1.406218956
FBgn0262965	89.99986256	1	CR43276	0.045597744	0.088918746	0.030151277	0.088623593
FBgn0028550	89.87536281	1	Atf3	0.47463813	0.339810756	0.193939103	0.325515953
FBgn0031888	89.84476426	1	Pvf2	0.179886768	0.544347006	0.138365623	0.132082853
FBgn0034215	89.73264394	1	Mtap	0.231475396	0.128879161	0.073462063	0.069564397
FBgn0037913	89.67027368	1	fabp	2.693035941	1.192400107	1.262936891	0.50753045
FBgn0000565	89.63723333	1	Eip71CD	0.036881551	0.007119539	0.005875438	0.015712792
FBgn0003891	89.52844296	1	tud	0.394762925	0.406663738	0.369071959	0.732380308
FBgn0042104	89.52343109	1	CG18747	0.082546135	0.04140385	0.059579796	0.015199018
FBgn0013759	89.40397736	1	CASK	0.166515229	0.202045741	0.254076666	0.551719618
FBgn0054054	89.29991009	1	CG34054	0.094098556	0.071088176	0.029032473	0.041975123
FBgn0038100	89.27663857	1	Paip2	0.73755689	0.835006847	0.553816986	1.164906927
FBgn0034194	89.23575471	1	CG15611	0.615538105	0.599571971	0.275033297	0.117354163
FBgn0261625	89.21972823	1	GLS	0.156681771	0.187063255	0.318330798	0.176597818
FBgn0035321	89.17925438	1	CG1275	0.307965361	0.229403057	0.089450528	0.0717242
FBgn0264324	89.08172762	1	spg	0.134831163	0.082199255	0.03126208	0.102389203
FBgn0022069	89.04116211	1	Nnp-1	0.278184284	0.180308679	0.235539376	0.088761778
FBgn0036929	88.9608121	1	CG7668	0.556308783	0.883051397	1.097573598	0.996931078
FBgn0037074	88.89990525	1	CG7324	0.552701771	0.833072612	0.555719624	0.887515748
FBgn0030052	88.88124178	1	CG12065	10.00081205	13.0431711	11.80987673	14.53033479
FBgn0039044	88.84828992	1	p53	0.119544669	0.104201444	0.047951541	0.089635955
FBgn0259683	88.82674317	1	Ir40a	0.05656573	0.026686842	0.003821704	0.008957764
FBgn0051365	88.71008717	1	CG31365	0.050619355	0.042859686	0.022620165	0.018546317
FBgn0039538	88.63618961	1	CG12883	0.026163701	0.025860083	0.032541664	0.054241999
FBgn0259175	88.58921749	1	ome	0.169142131	0.363802898	0.230293608	0.526245603
FBgn0046763	88.5430417	1	CG17278	0.212728051	0.214547803	0.099878506	0.109750474
FBgn0003701	88.48843284	1	thr	0.072094202	0.00805385	0.013116097	0.004626592
FBgn0261286	88.38557083	1	Mat89Ba	0.062851462	0.023739497	0.03285956	0.009567823
FBgn0051064	88.35258369	1	CG31064	0.192001139	0.188791316	0.204257643	0.42401603
FBgn0002542	88.21391985	1	lds	0.595905508	0.414775964	0.196956685	0.100665935
FBgn0053136	88.12850712	1	CG33136	0.006230919	0.012903112	0.006968075	0.020211385
FBgn0039137	88.12263795	1	CG13604	0.019616133	0.009329446	0.015339249	0.009981982
FBgn0086691	88.02714343	1	UK114	0.065666129	0.078953601	0.094653522	0.009947811
FBgn0032208	88.00528139	1	Ufd4	0.426409904	0.531474367	0.578707737	1.166061483
FBgn0030056	87.90022085	1	CAH3	0.158844652	0.164573509	0.135511659	0.483948848
FBgn0025469	87.84600467	1	slv	0.281908221	0.194888626	0.135891759	0.140400014
FBgn0029826	87.84360211	1	CG6041	0.050702199	0.057958893	0.030404422	0.026973121
FBgn0030087	87.67779463	1	CG7766	0.308128734	0.235698701	0.251434845	0.580970166
FBgn0026404	87.63583449	1	Dronc	0.422372141	0.436213915	0.153431477	0.256455597
FBgn0051344	87.56382744	1	CG31344	0.257082393	0.32013046	0.157497188	0.118905374
FBgn0035719	87.36647449	1	tow	0.036626696	0.03585919	0.023470326	0.026434312
FBgn0030300	87.30955348	1	Sk1	0.026994416	0.075707587	0.045470088	0.028218204
FBgn0035679	87.24804131	1	CG10467	0.359863481	0.311443094	0.327706856	0.451168989
FBgn0063449	87.22075337	1	Uhg2	0.263833727	0.137440971	0.134123771	0.034536399
FBgn0026630	87.20081186	1	nes	0.335668172	0.406942865	0.849517189	0.374640723
FBgn0085320	87.01500607	1	CG34291	0.131987266	0.093558239	0.056641219	0.068244608
FBgn0262614	86.99427611	1	pyd	0.3423718	0.338063209	0.177661675	0.151757606
FBgn0262952	86.88254743	1	ND4	18.40755999	16.74159548	23.32138411	16.81875096
FBgn0037817	86.76863172	1	Cyp12e1	0.154653681	0.145929102	0.076521139	0.171891195
FBgn0002562	86.73045333	1	Lsp1alpha	0.060545499	0.068213699	0.033210033	0.031733506
FBgn0031428	86.5294462	1	CG9886	0.040188383	0.032750496	0.033126151	0.039254643
FBgn0039637	86.44888919	1	Ctl2	0.216567665	0.228450757	0.3689049	0.458706903
FBgn0036816	86.28149621	1	Indy	0.534494298	1.398760678	1.149374382	1.046930134
FBgn0052425	86.26862306	1	CG32425	0.467049212	0.707394871	0.469475929	0.826499126
FBgn0051044	86.00788499	1	lncRNA:CR31044	0.113594155	0.126440224	0.074997873	0.061897467
FBgn0040609	85.97890449	1	CG3348	0.216434297	0.375530329	0.222381704	0.15098549
FBgn0052708	85.97229965	1	CG32708	0.120975739	0.088875915	0.063920378	0.033757517
FBgn0003475	85.95992701	1	spir	0.354131905	0.515429567	0.204603537	0.46175565
FBgn0034501	85.93861419	1	CG13868	0.585754132	0.873135785	1.15268339	1.263961719
FBgn0259233	85.85930849	1	CG42331	0.026104576	0.014453988	0.040329199	0.011148494
FBgn0035589	85.80009365	1	CHMP2B	0.477203606	0.704296872	0.58037527	0.912553636
FBgn0037142	85.74955798	1	CG14562	0.131644752	0.154801078	0.156843733	0.316308916
FBgn0034083	85.7179101	1	lbk	0.358000681	0.209524399	0.157754597	0.457100181
FBgn0013997	85.67788375	1	Nrx-IV	0.264567834	0.344656976	0.274240538	0.47927119
FBgn0038516	85.53106753	1	P5cr-2	0.320554334	0.386810024	0.494585422	0.840072316
FBgn0035085	85.50066397	1	CG3770	0.228998024	0.364194935	0.321425614	0.522807797
FBgn0026323	85.41177567	1	Tak1	0.192668271	0.233280886	0.53688206	0.42489924
FBgn0263260	85.35776371	1	sel	0.648166818	0.690154337	0.717924256	0.151974451
FBgn0001308	85.35284503	1	Khc	0.611477679	1.25893226	1.063331181	1.351497096
FBgn0037999	85.34920917	1	CG4860	0.223134598	0.081633367	0.075465255	0.045043701
FBgn0025454	85.25281375	1	Cyp6g1	0.021811511	0.006707087	0.008885401	0.009393712
FBgn0040907	85.23791688	1	mRpL33	1.43686498	1.418537832	1.010291669	0.62848263
FBgn0034647	85.23212721	1	pirk	0.145984715	0.062281026	0.06605787	0.029715483
FBgn0028983	85.21519285	1	Spn55B	0.378237592	0.654056425	0.629112587	1.091644668
FBgn0032036	85.13188178	1	CG13384	1.267281542	2.93345341	1.271436849	1.82609982
FBgn0005198	85.12784937	1	gig	0.036630633	0.043071096	0.03678031	0.04220479
FBgn0031016	84.87049582	1	kek5	0.054890058	0.037558145	0.022958986	0.042541781
FBgn0029822	84.83393562	1	CG12236	0.045268292	0.057174778	0.040673527	0.066623804
FBgn0001224	84.79617311	1	Hsp23	1.070411128	0.602826217	0.408944653	0.380036176
FBgn0031191	84.78897994	1	Cp110	0.361182452	0.197544216	0.162803408	0.216716383
FBgn0033431	84.77014728	1	CG1827	0.320164576	0.196409999	0.109230336	0.090948192
FBgn0031737	84.7540587	1	obst-E	0.022491754	0.005760152	0.005312306	0.008082723
FBgn0016076	84.72029226	1	vri	0.221214943	0.208319119	0.187873735	0.332296903
FBgn0031693	84.71533407	1	Cyp4ac1	0.062507034	0.042775067	0.013255716	0.01934617
FBgn0052243	84.58432372	1	CG32243	0.453394056	0.499279785	0.352000342	0.582197857
FBgn0052521	84.57889769	1	CG32521	0.105625253	0.097853376	0.315906845	0.45283441
FBgn0267376	84.54648357	1	SelR	0.386382926	0.547635399	0.945894693	0.384770954
FBgn0250754	84.50994833	1	CG42232	0.388650327	0.223530937	0.113450809	0.106552054
FBgn0031663	84.47818857	1	CG8891	0.515483145	0.466286178	0.308031546	0.134373595
FBgn0054015	84.44100267	1	CG34015	0.200143288	0.137837279	0.20599882	0.134865323
FBgn0015372	84.44029229	1	RabX1	0.303117125	0.358000542	0.204282126	0.232305283
FBgn0031059	84.38696622	1	CG14229	0.24491811	0.220245365	0.151951015	0.396056319
FBgn0026369	84.34384154	1	Sara	0.473428195	0.587722409	0.494033581	0.818732499
FBgn0036316	84.33154126	1	CG10960	0.582769923	0.776073981	0.857378132	0.444123043
FBgn0039466	84.20336691	1	CG5521	0.16361991	0.121882926	0.341572401	0.562414515
FBgn0036732	84.19736678	1	Oatp74D	0.524395743	0.336063215	0.329141577	0.548126879
FBgn0266064	84.11060855	1	GlyS	0.202172744	0.110449942	0.109810149	0.21696232
FBgn0262619	84.08912579	1	DNAlig1	0.15358537	0.083133617	0.079333583	0.022694373
FBgn0028663	83.86812745	1	VhaM9.7-b	4.478645746	6.003459617	6.166287581	7.566341059
FBgn0032919	83.83397445	1	CG9253	0.535420688	0.371034941	0.369297396	0.14917676
FBgn0267408	83.81988564	1	AOX1	0.512079881	0.214325208	0.203533962	0.268050555
FBgn0031119	83.74927877	1	CG1812	0.050941699	0.050420643	0.134245512	0.132633726
FBgn0030391	83.35173352	1	Rab40	0.108416894	0.105629235	0.15616956	0.218061256
FBgn0028970	83.29598626	1	betaggt-II	0.572736408	0.695714601	0.79399816	0.858154748
FBgn0262524	83.28860142	1	ver	0.144941427	0.065945014	0.044055234	0.042524005
FBgn0011666	83.19501831	1	msi	2.248288281	2.404243861	2.705614865	3.752826339
FBgn0035789	83.1390856	1	mthl6	0.132465992	0.076064439	0.066026229	0.022979588
FBgn0032864	83.12538165	1	CG2493	1.236997713	0.927456692	0.490950815	0.416730414
FBgn0039487	83.05378175	1	gb	0.935952541	0.508659582	0.4000824	0.246055565
FBgn0033544	83.0458688	1	CG7220	0.320923264	0.333737203	0.530367576	0.859109447
FBgn0002534	82.93634613	1	Lcp3	0.056977736	0.04064642	0.0221689	0.022059091
FBgn0019661	82.89958032	1	lncRNA:roX1	4.643094314	3.216221292	2.695493239	2.37364279
FBgn0030189	82.86826342	1	CG2909	0.083616731	0.03226765	0.026804441	0.029225289
FBgn0025815	82.83698066	1	Mcm6	0.391101907	0.180849117	0.227286378	0.077168279
FBgn0004858	82.76696742	1	elB	0.073771803	0.103148042	0.151934382	0.155045518
FBgn0036843	82.69702814	1	Sfxn2	0.206323356	0.162199119	0.219349162	0.369189746
FBgn0085271	82.55980198	1	CG34242	0.205338692	0.135474662	0.145966198	0.180459529
FBgn0053192	82.55926158	1	MtnD	0.120983087	0.071368931	0.175521912	0.167161877
FBgn0040319	82.53024184	1	Gclc	0.38979599	0.556818689	0.517167453	0.543478268
FBgn0033686	82.50446683	1	Hen1	0.02035278	0.00808693	0.028328461	0.018746237
FBgn0267698	82.49483031	1	Pak	0.304373322	0.486654519	0.441474919	0.744002613
FBgn0285917	82.27060147	1	sbb	0.816474127	0.477724849	0.492115988	0.922605758
FBgn0038683	82.24970932	1	CG11779	0.228458458	0.250294928	0.559239394	0.439136316
FBgn0027601	82.08559217	1	pdgy	0.800993585	1.043715796	0.344394535	0.252710012
FBgn0016917	82.05262993	1	Stat92E	1.19997649	0.809490428	0.585773359	0.346871369
FBgn0000261	81.97264292	1	Cat	1.152317772	0.877177075	0.422179289	0.515450609
FBgn0038197	81.86927969	1	foxo	0.249901312	0.348869972	0.706540009	0.491160451
FBgn0015803	81.82330004	1	RtGEF	0.18541549	0.245656996	0.320102214	0.471904122
FBgn0013718	81.79962652	1	nuf	0.962194822	2.220169994	1.669182029	1.756916061
FBgn0263593	81.69721173	1	Lpin	0.13288074	0.081051319	0.054461211	0.088229781
FBgn0005612	81.69287796	1	Sox14	0.150329823	0.168052589	0.05918705	0.122575091
FBgn0035517	81.64327785	1	CG1265	0.6384679	0.453561944	0.391561352	0.973779673
FBgn0033373	81.63368651	1	CG8080	1.106923219	0.538340331	0.3111173	0.325748171
FBgn0264695	81.62230015	1	Mhc	0.034433724	0.020180753	0.014821882	0.011487531
FBgn0285913	81.62036239	1	red	0.426486357	0.437288501	0.124584756	0.174382915
FBgn0267505	81.61248132	1	pre-rRNA:CR45845	2.225849066	2.580364447	3.236305342	1.618621175
FBgn0261703	81.6097807	1	gce	0.281356492	0.140695455	0.043025262	0.055634798
FBgn0266696	81.56156892	1	Svil	0.853786591	0.558679189	0.22043399	0.303070722
FBgn0267665	81.43002283	1	lncRNA:CR46003	0.006138879	0.002456733	0.022011638	0.016337801
FBgn0003371	81.37935409	1	sgg	1.945844479	2.731345139	3.422857655	3.853967759
FBgn0038034	81.36655315	1	Cyp9f3	0.28676967	0.214306606	0.114882793	0.120514115
FBgn0036381	81.24460766	1	CG8745	0.043351284	0.016618672	0.013489746	0.011852204
FBgn0003175	81.1092845	1	px	0.349187319	0.277468652	0.122414932	0.088269736
FBgn0020513	81.0690684	1	Paics	0.901251126	0.564974398	0.363173667	0.359117312
FBgn0036815	80.89184774	1	HipHop	0.210083286	0.084874616	0.047186703	0.029766478
FBgn0264491	80.8719148	1	how	0.784725395	0.949891215	1.256451489	1.818645211
FBgn0038294	80.85342923	1	Mf	0.042652725	0.027128509	0.01369553	0.010012495
FBgn0011754	80.84488361	1	PhKgamma	0.430472148	0.298688358	0.263993058	0.567630915
FBgn0062440	80.81647794	1	EMRE	0.543573964	0.525314562	0.768261488	1.073968291
FBgn0030310	80.62399136	1	PGRP-SA	0.111212446	0.129287049	0.05273977	0.029099697
FBgn0037315	80.48305854	1	Cerk	0.274954261	0.385721806	0.485286819	0.812023925
FBgn0034126	80.37975149	1	jtb	0.463601689	0.50116931	0.279459553	0.415157871
FBgn0012034	80.33331765	1	AcCoAS	0.365731901	0.66615021	0.666918252	1.004563488
FBgn0003053	80.26656244	1	peb	0.04915298	0.015158116	0.011396814	0.018534977
FBgn0263039	80.23395042	1	NA	0.692226386	0.690738924	0.4446156	0.153030962
FBgn0030748	80.22350569	1	Traf-like	0.48155339	0.502921101	0.374452327	0.570372942
FBgn0053977	80.19948364	1	CG33977	0.596696792	0.659084273	0.688033654	0.870692764
FBgn0028552	80.13404419	1	gammaSnap1	0.341946283	0.693930002	0.58510614	1.043615254
FBgn0037560	80.08708202	1	CR18228	0.214321026	0.198701435	0.115940058	0.178664103
FBgn0038428	79.95818233	1	CG14894	0.435354592	0.514326812	0.830435764	0.821088987
FBgn0033996	79.9531291	1	CG11807	0.245666858	0.394851491	0.429424686	0.692817219
FBgn0010340	79.89689355	1	140up	0.077958053	0.08136635	0.219237859	0.183223897
FBgn0286198	79.81791651	1	LKRSDH	0.819007392	0.890409364	0.339650318	0.237264827
FBgn0038746	79.75113435	1	Surf6	0.278432371	0.156607872	0.2232846	0.062388796
FBgn0003016	79.69538646	1	osp	0.062100506	0.058898935	0.063495731	0.151926634
FBgn0013676	79.66602778	1	COX3	46.00224651	45.43010886	56.08490015	49.96307069
FBgn0029114	79.55851248	1	Tollo	0.125328866	0.287033154	0.247548296	0.040536096
FBgn0266421	79.53150736	1	RPA3	0.854485251	0.381329516	0.346266407	0.243400692
FBgn0029969	79.51383176	1	CG10932	0.848916782	0.410352731	0.426242646	0.19148057
FBgn0035153	79.45628708	1	ebd1	0.102280291	0.095900825	0.089144887	0.030698863
FBgn0013469	79.40768885	1	klu	0.025204754	0.01672407	0.042439395	0.020163287
FBgn0029959	79.35454713	1	Rab39	0.171442953	0.159652911	0.174416832	0.30300854
FBgn0031536	79.2078043	1	Cog3	0.154154057	0.214336688	0.184287729	0.148392359
FBgn0043364	79.08312757	1	cbt	0.204064725	0.146981158	0.111734074	0.262524348
FBgn0260745	79.07835331	1	mfas	0.366100887	0.216696242	0.383307541	0.096421242
FBgn0033653	79.04368625	1	CG13192	0.067010835	0.04105086	0.027691982	0.034724969
FBgn0036643	79.03959844	1	Syx8	0.534643926	0.764812538	0.963568438	1.269881599
FBgn0284435	79.03370869	1	tyn	0.097488232	0.097156917	0.043692448	0.012174198
FBgn0037556	78.99578557	1	CG9636	0.258718087	0.229685228	0.133908144	0.260239947
FBgn0002869	78.93738237	1	MtnB	0.22581387	0.096115618	0.098674689	0.147844476
FBgn0262788	78.93616804	1	CG43169	0.005402771	0.011258243	0.00694881	0.015587077
FBgn0262146	78.92391485	1	MtnE	0.119714921	0.057122389	0.092170356	0.065125065
FBgn0038735	78.82956313	1	CG4662	0.189013804	0.275742551	0.315569705	0.471834057
FBgn0034312	78.79048384	1	CG10916	0.298054131	0.480855137	0.244090688	0.465722734
FBgn0031030	78.7853777	1	Tao	0.708099498	1.009252899	1.509440354	1.766810745
FBgn0283666	78.77337878	1	Rap2l	0.479501576	0.927419241	0.691266087	1.087941113
FBgn0265487	78.74510233	1	mbl	0.253744675	0.308167148	0.415746277	0.885857126
FBgn0039111	78.65497165	1	PTPMT1	0.192768016	0.307685651	0.198595739	0.342685654
FBgn0010173	78.64757273	1	RpA-70	0.667154403	0.470811987	0.296105164	0.222530041
FBgn0034970	78.6032529	1	yki	0.782750443	1.524404533	1.214607867	1.554347511
FBgn0022361	78.51277569	1	Pur-alpha	0.454538331	0.497770505	0.374298565	0.69560469
FBgn0038809	78.43557623	1	CG16953	0.449426747	0.90960885	0.465884849	0.784207411
FBgn0031637	78.38152934	1	mxt	0.626374021	0.840781766	0.894873024	1.34240375
FBgn0260003	78.33250912	1	Dys	0.150221552	0.161861051	0.124745309	0.197789693
FBgn0250868	78.29334844	1	CG42239	2.056211172	2.884461167	2.551067697	2.494155807
FBgn0020389	78.23605771	1	Papss	0.280359675	0.321184631	0.183848463	0.166597279
FBgn0000479	78.23212264	1	dnc	0.392826626	0.376988903	0.471486383	0.733087737
FBgn0263048	78.22415907	1	Gpdh3	0.040342404	0.011511208	0.017235475	0.028255563
FBgn0285910	78.2076673	1	VhaAC39-1	1.50704517	2.053004956	2.097100352	3.015447346
FBgn0061198	78.07212154	1	HSPC300	1.785424357	2.735135279	2.754272144	2.892756143
FBgn0023507	78.02235485	1	D2hgdh	0.141719188	0.082527083	0.052552595	0.070919444
FBgn0051216	77.84554525	1	Naam	0.06130603	0.116666431	0.140714916	0.187865019
FBgn0034870	77.83324033	1	CG13559	0.121939897	0.106857435	0.157390205	0.020632481
FBgn0031659	77.76712755	1	CG14043	0.184847712	0.223984043	0.223391122	0.255239217
FBgn0266418	77.73518488	1	wake	0.236759251	0.175792459	0.23950427	0.509139256
FBgn0004369	77.69167608	1	Ptp99A	0.065850903	0.075477533	0.069698999	0.158313528
FBgn0031952	77.65805692	1	cdc14	0.282540799	0.234805689	0.25735368	0.517215991
FBgn0036728	77.5897502	1	UQCR-Q	4.046769162	2.676427898	3.396888056	2.156956642
FBgn0032956	77.51768331	1	Cul2	0.37854732	0.4339737	0.607912985	0.999657252
FBgn0029710	77.39237404	1	CG3568	0.670461231	1.397872292	0.614508441	1.032499705
FBgn0031374	77.25296251	1	Wdr62	0.666756029	1.39241855	1.170858479	1.676523978
FBgn0085195	77.24536659	1	CG34166	0.146823316	0.167709817	0.051986265	0.07853142
FBgn0027529	77.20892346	1	tapas	0.19207853	0.206404562	0.328130549	0.437540084
FBgn0035981	77.19542612	1	CG4452	0.222240584	0.120644346	0.174005831	0.264569704
FBgn0033551	77.19232441	1	CG7222	0.258489897	0.279568821	0.395468286	0.66451217
FBgn0261108	77.14725002	1	Atg13	0.486110453	0.684470464	0.776471878	1.00422941
FBgn0031143	77.12656552	1	CG1532	1.328658457	2.034381257	1.874656605	2.49621155
FBgn0011747	77.10902659	1	Ank	1.292098788	2.055364947	1.624233527	2.408318908
FBgn0019660	77.06329897	1	lncRNA:roX2	0.340961485	0.324746651	0.417601464	0.354440784
FBgn0033205	76.98082536	1	CG2064	0.280758309	0.439878418	0.178309238	0.159748605
FBgn0026079	76.97079274	1	Nsun2	0.313046723	0.228529083	0.216738433	0.058126097
FBgn0283473	76.96638309	1	S6KL	0.040861501	0.041515582	0.058356949	0.104250571
FBgn0261041	76.85207027	1	stj	0.075654475	0.047702365	0.08792619	0.019799733
FBgn0039751	76.82221093	1	CG1983	0.22430452	0.136595789	0.141842965	0.252408087
FBgn0010379	76.80729577	1	Akt1	0.432875698	0.389460537	0.404019959	0.854026331
FBgn0038038	76.64040262	1	Sccpdh2	0.101143584	0.119383671	0.048147698	0.049342535
FBgn0037536	76.56605961	1	CG2698	0.401034054	0.432768959	0.590567906	0.810105249
FBgn0036318	76.50073426	1	Wbp2	1.47279686	2.235472	2.390536859	3.08793905
FBgn0000276	76.45882777	1	CecA1	0.16551702	0.251308614	0.297345483	0.165136231
FBgn0029659	76.39329874	1	CG16782	0.036884868	0.025864434	0.008082745	0.014429892
FBgn0033087	76.37969956	1	Hsepi	0.090604974	0.196702694	0.1606976	0.328200848
FBgn0020269	76.3379097	1	mspo	0.103067955	0.087291366	0.021227582	0.039473548
FBgn0033555	76.19555258	1	RpS15Ab	0.313705019	0.160444794	0.19903058	0.101616236
FBgn0032938	76.13665412	1	CG8671	0.38263967	0.385608704	0.319788506	0.58679791
FBgn0051849	76.00814789	1	CG31849	0.072617345	0.088305166	0.077702712	0.121047873
FBgn0011672	75.92999649	1	Mvl	0.847986439	1.437575795	0.596741263	0.568297119
FBgn0034091	75.90161694	1	mrj	0.555498654	0.86169122	0.758322686	1.281938721
FBgn0051961	75.84789819	1	TBCC	0.276885603	0.367374965	0.5987927	0.638290207
FBgn0035959	75.84168856	1	CG4911	0.097892969	0.161640486	0.114877338	0.227068811
FBgn0051778	75.76917296	1	CG31778	0.234220904	0.175956261	0.123065288	0.095104578
FBgn0031049	75.74349649	1	Sec61gamma	1.556266153	1.073340053	1.706428695	0.723387122
FBgn0051710	75.66063221	1	CG31710	0.290713761	0.346018482	0.531402655	0.74707862
FBgn0003963	75.4667315	1	ush	1.060484622	0.939682725	0.456558878	0.722319177
FBgn0028425	75.46616283	1	JhI-21	0.159437832	0.296463889	0.289849195	0.2131384
FBgn0029088	75.32488286	1	disp	0.193782548	0.144377377	0.377254372	0.346084173
FBgn0263617	75.28915846	1	lncRNA:CR43626	0.219690193	0.20158141	0.100885172	0.208744961
FBgn0020386	75.2618048	1	Pdk1	0.664161384	0.604615718	0.247798213	0.133181856
FBgn0038320	75.20969278	1	Sra-1	0.692423343	1.024916455	1.239408352	1.195002117
FBgn0063498	75.17913609	1	GstE2	0.111757936	0.112725293	0.17524486	0.135162039
FBgn0085736	75.15298525	1	CG40472	0.29956397	0.205652609	0.242669656	0.24839562
FBgn0250816	74.93883829	1	AGO3	0.078651616	0.087463493	0.068291555	0.129458796
FBgn0031484	74.93326232	1	CG3165	0.579967715	0.305794278	0.420621424	0.563721118
FBgn0038609	74.92663968	1	Nup43	0.236181871	0.148317608	0.144781087	0.067282442
FBgn0034583	74.79885142	1	CG10527	3.00540801	3.629646884	3.378721244	3.82155453
FBgn0000667	74.78554218	1	Actn	0.186797169	0.130566393	0.068935302	0.099418505
FBgn0034631	74.75196069	1	TAF1C-like	0.05078958	0.034451486	0.035594623	0.041596075
FBgn0051522	74.6630334	1	CG31522	0.093650012	0.08389648	0.071935152	0.126963538
FBgn0031498	74.61041093	1	CG17260	0.081314073	0.161289851	0.166436471	0.173676484
FBgn0034245	74.60892699	1	UQCR-6.4	3.309613615	2.598169116	3.587501629	1.940865304
FBgn0033075	74.60718177	1	NA	0.212965183	0.107925293	0.099529906	0.087293245
FBgn0052865	74.49589873	1	lncRNA:alphagamma-element:CR32865	0.02110791	0.002579305	0.01673581	0.017266295
FBgn0045073	74.46572543	1	Stim	1.263232794	1.80424827	1.714128918	2.169547862
FBgn0003310	74.40269468	1	S	0.082072246	0.146492585	0.223910368	0.171683134
FBgn0262579	74.34493328	1	Ect4	0.503698655	0.235329253	0.21259202	0.187107631
FBgn0266452	74.33307618	1	CTPsyn	0.286706939	0.139356399	0.122954625	0.054163182
FBgn0086757	74.30832387	1	cbs	0.270532743	0.218331728	0.34812095	0.577441649
FBgn0037533	74.21321344	1	CD98hc	0.991323326	0.911508204	1.871264216	1.499605904
FBgn0038118	74.1748713	1	timeout	0.10493355	0.045694099	0.064877971	0.008647128
FBgn0032901	74.14574268	1	sky	0.357861399	0.237967849	0.19724962	0.362442952
FBgn0004913	74.0893897	1	Gnf1	0.313369881	0.144745486	0.121693498	0.076081267
FBgn0017414	73.8526158	1	cag	0.123867848	0.147515316	0.153014468	0.229917564
FBgn0030349	73.80796699	1	CG10353	0.130913817	0.140495114	0.136904378	0.242638577
FBgn0038277	73.78417272	1	RpS5b	0.006385436	0.005946665	0.010436352	0.00023557
FBgn0032129	73.77357244	1	jp	0.085950815	0.059007727	0.035243657	0.059903398
FBgn0025726	73.74181573	1	unc-13	0.105116379	0.128456657	0.072972292	0.15037288
FBgn0002563	73.68494031	1	Lsp1beta	0.364467431	0.267237488	0.195909879	0.177000833
FBgn0010441	73.64014508	1	pll	0.442675913	0.811699876	0.775913141	0.933833366
FBgn0031782	73.59273927	1	WDR79	0.161862359	0.095456555	0.058365121	0.026300676
FBgn0039505	73.5860765	1	CG5934	0.554555086	0.857072945	0.874058897	1.164168757
FBgn0027330	73.51502661	1	l(1)G0020	0.166387243	0.096534727	0.129166612	0.029842693
FBgn0051915	73.50337992	1	CG31915	0.236585604	0.1705044	0.065855457	0.043960386
FBgn0030607	73.46876356	1	dob	0.183751807	0.116457742	0.077805459	0.109929773
FBgn0003559	73.45940624	1	su(f)	0.27926814	0.195788579	0.143963167	0.139836576
FBgn0032474	73.43776122	1	DnaJ-H	0.126930522	0.189108629	0.147832618	0.267058132
FBgn0037206	73.3877585	1	CG12768	0.080031959	0.018644605	0.016168975	0.023642468
FBgn0035106	73.35247556	1	rno	0.198593714	0.20218596	0.180494414	0.140272523
FBgn0036288	73.32988025	1	CG10660	0.13694053	0.149300701	0.069470641	0.065803569
FBgn0031974	73.32167567	1	CG12560	0.060673308	0.029152389	0.016282225	0.013796262
FBgn0082585	73.30629889	1	sprt	0.036250072	0.02256586	0.023442533	0.035161564
FBgn0030054	73.26147565	1	Caf1-180	0.318255079	0.181915619	0.165043489	0.087088643
FBgn0000044	73.20210967	1	Act57B	0.161462451	0.132354598	0.076988671	0.085377921
FBgn0031011	73.18077503	1	CG8034	0.102629859	0.11082004	0.105876907	0.238335631
FBgn0038966	73.16202086	1	pinta	0.850909689	1.232707731	0.636091106	0.517819431
FBgn0003048	73.14841294	1	pcx	0.233803893	0.252608286	0.235927305	0.348102226
FBgn0030041	73.08855743	1	CG12116	0.038966528	0.029991743	0.01568293	0.017385021
FBgn0031813	73.05723936	1	CG9527	0.159133585	0.14482615	0.086401714	0.103094218
FBgn0031752	73.04859636	1	CG9044	0.172493134	0.230547026	0.225653287	0.375376427
FBgn0033523	72.99609868	1	CG12895	0.049180982	0.066136192	0.051577909	0.064175579
FBgn0019686	72.99299089	1	lok	0.13410693	0.040764049	0.042174003	0.029012313
FBgn0031560	72.84882919	1	CG16713	0.05210856	0.0573299	0.072875881	0.034258253
FBgn0035763	72.82554365	1	CG8602	1.202828059	2.420614063	1.166566462	1.658003977
FBgn0037469	72.81814224	1	Dpck	0.28351583	0.166740648	0.114420895	0.122148031
FBgn0029825	72.6343702	1	CG12728	0.124562406	0.178962591	0.188405849	0.269128137
FBgn0001234	72.55494963	1	lncRNA:Hsromega	2.295998293	2.302151935	1.583982644	1.725356601
FBgn0033907	72.55198592	1	mRpS16	0.49577868	0.462170069	0.61188177	0.270186648
FBgn0031609	72.48172299	1	CG15443	0.034253697	0.025647392	0.037934123	0.021637821
FBgn0260985	72.4377442	1	RfC4	0.324148989	0.128617795	0.104270672	0.081586788
FBgn0039928	72.43238184	1	Cals	0.366980985	0.546212486	0.383726109	0.953243429
FBgn0002567	72.37349648	1	Rab32	0.165121992	0.15902167	0.094381772	0.193290746
FBgn0039132	72.34558033	1	AP-1sigma	0.416467346	0.639308707	0.771790091	1.021157798
FBgn0036697	72.29772568	1	rogdi	0.439052245	0.715936101	0.427332158	0.746283277
FBgn0033438	72.20992032	1	Mmp2	1.067284301	1.535644349	0.361184884	0.6385859
FBgn0267635	72.16177503	1	lncRNA:CR45973	0.03933844	0.0776306	0.111762984	0.102714063
FBgn0265052	72.15037291	1	St3	0.059947701	0.051273132	0.015203539	0.034956904
FBgn0038099	72.14031319	1	CG7091	0.0999632	0.073582023	0.072151923	0.051420149
FBgn0004390	72.12507333	1	RasGAP1	0.289143353	0.300337501	0.085048874	0.084762155
FBgn0036844	72.04507599	1	Mkp3	0.213325149	0.138042173	0.065891024	0.076361812
FBgn0000228	72.03194788	1	Bsg25D	0.176922271	0.161754237	0.156693739	0.207301885
FBgn0039051	72.02863732	1	CG17109	0.106798334	0.070893085	0.082202412	0.105954111
FBgn0259728	71.97185348	1	CG42382	0.063337712	0.084846747	0.05032849	0.06132456
FBgn0001230	71.91026685	1	Hsp68	0.498656908	0.323695972	0.364086543	0.289096831
FBgn0053969	71.76944615	1	CG33969	0.096958752	0.064988407	0.065223298	0.062033189
FBgn0041630	71.76092149	1	Hexo1	0.367786964	0.231768124	0.135746514	0.083662066
FBgn0023540	71.76016447	1	CG3630	0.031987961	0.024334215	0.005752126	0.012752056
FBgn0262737	71.68826811	1	mub	0.211118417	0.148887427	0.14173037	0.065469275
FBgn0003557	71.53493721	1	Su(dx)	0.492366014	0.662888877	0.692781609	0.69849476
FBgn0264517	71.50513843	1	asRNA:CR43916	0.067235427	0.032185987	0.0337567	0.041611657
FBgn0027499	71.38377574	1	wde	0.16890107	0.123777058	0.181073381	0.163422399
FBgn0053170	71.34396141	1	CG33170	0.890768464	1.022666744	0.72765067	1.044296771
FBgn0035461	71.33994574	1	ntc	0.021942142	0.01746504	0.011521839	0.02372252
FBgn0029873	71.31856654	1	CG3918	0.159427209	0.191269195	0.108949976	0.17212557
FBgn0024273	71.16194344	1	WASp	0.310143963	0.584011468	0.408511755	0.531103675
FBgn0035996	71.12240524	1	CG3448	0.110610242	0.107306755	0.080120594	0.098070093
FBgn0030628	71.10457144	1	CG9114	0.17362103	0.092478843	0.054270882	0.043504053
FBgn0037022	71.0863636	1	CG11396	0.033960886	0.047468961	0.085122763	0.110136327
FBgn0035849	71.07807937	1	ERR	0.056245701	0.094056138	0.058475441	0.082595829
FBgn0010316	71.06282092	1	dap	0.200317507	0.139881596	0.122572877	0.078694867
FBgn0030090	71.05686429	1	fend	0.550614575	0.898842749	0.658180792	0.770728043
FBgn0000286	71.04373312	1	Cf2	0.182118265	0.279583524	0.241366615	0.350548647
FBgn0027581	71.01638903	1	CG6191	0.071370443	0.08803598	0.123825636	0.204294271
FBgn0266369	70.9678763	1	Mtp	0.185198747	0.194993576	0.146126886	0.081353958
FBgn0039467	70.9367627	1	CG14253	1.68096324	2.512351729	2.180798336	2.152403546
FBgn0032849	70.90787106	1	mRpS18B	0.151237959	0.1669644	0.178403616	0.065152952
FBgn0051158	70.87256395	1	Efa6	0.322561195	0.352075413	0.485460256	0.849313532
FBgn0267668	70.77826195	1	lncRNA:CR46006	0.372586035	0.552749644	0.338698909	0.489583851
FBgn0264310	70.71581439	1	lncRNA:CR43785	0.003652125	0.000189809	0.003366443	-0.000297401
FBgn0283427	70.61444389	1	FASN1	0.693848221	0.551072204	0.321806622	0.41293558
FBgn0051955	70.60244544	1	CG31955	0.297535271	0.303840486	0.130493816	0.079955115
FBgn0038881	70.54721788	1	CG16791	0.152553457	0.084462164	0.064379533	0.066386748
FBgn0031910	70.45356427	1	CG15818	0.03713468	0.049504215	0.074382572	0.056879945
FBgn0038388	70.27631185	1	CG4287	0.298052919	0.401440425	0.426612977	0.59827878
FBgn0026160	70.24465383	1	tna	0.793571282	0.94784618	0.738713268	1.037290027
FBgn0011297	70.22439074	1	Alg3	0.319956096	0.232682159	0.152772719	0.070489916
FBgn0036059	70.1861352	1	nudE	0.36867639	0.269645663	0.3277092	0.544496819
FBgn0027836	70.18520545	1	Dgp-1	0.240959218	0.193978317	0.103192334	0.188723303
FBgn0040297	70.14135564	1	Nhe2	0.317985949	0.507373769	0.627211919	0.481117614
FBgn0039854	70.08919385	1	CG1635	0.175151976	0.172515284	0.1646192	0.193380578
FBgn0032197	70.07519668	1	CG5694	0.271494921	0.345294624	0.410092381	0.490278735
FBgn0051174	70.01955333	1	CG31174	0.036466138	0.033329482	0.052654023	0.062619361
FBgn0031950	69.96589491	1	Herp	0.224495796	0.281322365	0.313998267	0.362402802
FBgn0037958	69.96346225	1	CG6962	0.139973261	0.070798265	0.11936538	0.034289527
FBgn0085450	69.81990183	1	Snoo	0.428771963	0.279913024	0.131603465	0.196277819
FBgn0037336	69.80558635	1	CG2519	0.1141418	0.07990145	0.042629895	0.026912074
FBgn0030660	69.73579668	1	CG8097	0.029481407	0.023074153	0.046446467	0.011471484
FBgn0043362	69.59266069	1	bchs	0.049284196	0.089125033	0.116114778	0.170729233
FBgn0038660	69.49518814	1	CG14291	0.198172468	0.18658339	0.102379474	0.06033005
FBgn0263237	69.48632503	1	Cdk7	0.188760041	0.108199314	0.127185549	0.106980762
FBgn0000330	69.4787705	1	cm	0.413383623	0.585069476	0.585765612	0.70537547
FBgn0035953	69.44053347	1	CG5087	0.049001453	0.058749468	0.054603995	0.071504989
FBgn0262081	69.37079582	1	Csk	0.430830866	0.670826552	0.3117784	0.195583301
FBgn0052267	69.33248271	1	CG32267	0.584030817	0.485297897	0.445734468	0.222546266
FBgn0051005	69.30563539	1	qless	0.05964878	0.048343947	0.052522305	0.024822261
FBgn0032397	69.2820875	1	Tom70	0.229209322	0.273087883	0.327101922	0.159543808
FBgn0040066	69.20064205	1	wds	0.395942469	0.375688262	0.270316294	0.127565752
FBgn0263110	69.16467073	1	CG43367	0.217028927	0.22313213	0.25062431	0.487468458
FBgn0263289	69.13824562	1	scrib	0.313943752	0.349067361	0.461593993	0.852022518
FBgn0025335	69.0490816	1	Cpes	0.592884657	0.923050961	1.018628575	1.152547895
FBgn0034626	69.02018576	1	CG10795	0.204173865	0.316573713	0.203942895	0.36991951
FBgn0030081	68.97418234	1	CG7246	0.130357678	0.108715843	0.087295046	0.124028587
FBgn0262740	68.94306727	1	Evi5	0.254084525	0.285163142	0.104330763	0.218794462
FBgn0011592	68.93275335	1	fra	0.046882377	0.01820273	0.015591953	0.012595377
FBgn0040238	68.91814209	1	Best1	0.433198242	0.831308992	0.33102761	0.253550388
FBgn0053523	68.89991406	1	CG33523	0.33092198	0.43643516	0.512489211	0.573645018
FBgn0000615	68.733336	1	exu	0.115911866	0.115467098	0.123743939	0.092709662
FBgn0028507	68.70170164	1	CG3793	0.304014922	0.431386361	0.482282476	0.507361892
FBgn0039969	68.61195488	1	Fis1	1.287982413	1.53374681	1.494720162	2.039908329
FBgn0036483	68.505093	1	CG12316	0.169044999	0.115109601	0.06277888	0.082558133
FBgn0038129	68.48772773	1	TBC1D5	0.246022093	0.273015398	0.097892734	0.114164617
FBgn0030467	68.47645049	1	CG1764	0.277785529	0.280818041	0.40350799	0.616880638
FBgn0037878	68.4673187	1	CG6693	0.317650209	0.223079504	0.171345028	0.140898522
FBgn0086674	68.4180172	1	Tpst	0.137359994	0.192210056	0.293448666	0.237448353
FBgn0002566	68.41456047	1	lt	0.338927687	0.369816102	0.348794627	0.48567369
FBgn0266670	68.38924376	1	Sec5	0.269082456	0.301036224	0.302204119	0.396615089
FBgn0052537	68.27926844	1	CG32537	0.061765744	0.038922724	0.059658033	0.056143693
FBgn0030328	68.1915474	1	Amun	0.882773675	0.889496619	1.783756971	2.0645702
FBgn0020647	68.17065827	1	KrT95D	0.472180062	0.631395921	0.205135729	0.213132402
FBgn0025777	68.14950574	1	homer	0.115143798	0.101742927	0.076215532	0.112362734
FBgn0038432	68.11777867	1	CG14883	0.117398299	0.201698116	0.216623699	0.196580499
FBgn0036927	68.00669208	1	Gabat	0.025226108	0.00451516	0.005946902	0.002573411
FBgn0024364	67.97998176	1	CG11417	0.305346494	0.207077851	0.240695218	0.097425278
FBgn0085468	67.97173039	1	ND-MWFE	1.796650579	1.327203252	1.259160472	1.078722682
FBgn0038577	67.9377802	1	CG12321	0.375576331	0.377917681	0.398569809	0.349731159
FBgn0003520	67.86433408	1	stau	0.140106593	0.157653197	0.143526141	0.354566183
FBgn0035488	67.8013158	1	CG11593	0.16309129	0.236733868	0.308205557	0.361309318
FBgn0053516	67.77090571	1	dpr3	0.190636387	0.204526514	0.158618797	0.23317166
FBgn0000546	67.72696153	1	EcR	0.389619554	0.196240839	0.14400405	0.243296415
FBgn0264751	67.71828444	1	Vti1b	0.436188469	0.3870347	0.327516222	0.359080526
FBgn0032751	67.67422238	1	CG17343	0.116396422	0.111191061	0.087131819	0.118804554
FBgn0000152	67.61466842	1	Axs	0.155196188	0.276349403	0.238223305	0.243219211
FBgn0004875	67.61234481	1	enc	0.242581975	0.11424717	0.158921395	0.337910507
FBgn0031589	67.57777586	1	Naprt	0.144457935	0.118789402	0.119772898	0.227446205
FBgn0028936	67.50469711	1	NimB5	1.419415276	1.428770287	1.276923949	1.315315529
FBgn0260008	67.42248047	1	UQCR-11	3.186162831	3.489252832	3.891642405	3.029590608
FBgn0033471	67.32964272	1	CG12134	0.300231954	0.258311026	0.196025092	0.10024799
FBgn0005624	67.31429664	1	Psc	0.349410424	0.282605927	0.280158836	0.135465094
FBgn0262169	67.27876909	1	magu	0.066799623	0.012207709	0.034775509	0.051398222
FBgn0039929	67.19151654	1	CG11076	0.148419419	0.112951162	0.129083881	0.058580541
FBgn0052850	67.14886358	1	CG32850	0.609371281	0.378050304	0.365398239	0.531275527
FBgn0040793	67.11162943	1	CG7630	4.21874465	4.109315014	4.769726915	3.368291292
FBgn0033356	66.96282056	1	CG8229	0.185888709	0.158741373	0.13453989	0.182454765
FBgn0283680	66.96063682	1	IP3K2	0.089801457	0.066648645	0.040111942	0.033549556
FBgn0040334	66.92819078	1	Tsp3A	0.138292651	0.103308013	0.095670406	0.091631638
FBgn0039626	66.9000493	1	Slu7	0.194679137	0.170557261	0.341294821	0.240905359
FBgn0029800	66.76548676	1	lin-52	0.236625532	0.120613677	0.12571486	0.113686023
FBgn0030793	66.71059747	1	CG9125	0.168322348	0.105121551	0.099475545	0.055357492
FBgn0051635	66.65512244	1	CG31635	0.162439007	0.092124831	0.059317064	0.105507952
FBgn0037551	66.64483112	1	Arl8	0.297951466	0.4271141	0.354056988	0.595267984
FBgn0261380	66.45440269	1	mRpL37	0.175416716	0.215174577	0.289028661	0.153994045
FBgn0039877	66.44663092	1	Mccc1	0.113780978	0.04449686	0.048122702	0.032763071
FBgn0032456	66.32249722	1	MRP	0.660975358	0.416419524	0.347775761	0.34943354
FBgn0036090	66.30849472	1	CG8009	0.164127577	0.121165645	0.150480237	0.068979743
FBgn0034958	66.28566133	1	CG3907	0.138998238	0.155873368	0.230911731	0.301432084
FBgn0011656	66.16346129	1	Mef2	0.33879226	0.530439988	0.438147276	0.69759095
FBgn0019662	66.06989534	1	qm	0.439121462	0.656197783	0.485903406	0.514416438
FBgn0036537	66.05129804	1	CG18081	0.298497594	0.232162599	0.19432341	0.167037129
FBgn0039381	66.01272245	1	SppL	0.716152607	0.763832371	0.41498586	0.452986694
FBgn0011774	65.96454414	1	Irbp	0.127183803	0.117784022	0.074406182	0.116161589
FBgn0033121	65.95186215	1	Cyp6u1	0.299438106	0.328423175	0.386167401	0.671166955
FBgn0027945	65.92368283	1	ppl	0.2095203	0.213800691	0.501041977	0.479551582
FBgn0284220	65.9151713	1	Top2	0.824455391	0.614213865	0.360402139	0.252021057
FBgn0266667	65.91169837	1	Exo70	0.175913352	0.12609519	0.164553583	0.27075384
FBgn0003231	65.86102017	1	ref(2)P	0.792585196	1.033199798	0.776568566	1.025543797
FBgn0035132	65.73668272	1	mthl10	0.055765904	0.04713491	0.039134906	0.047539727
FBgn0000109	65.71270455	1	Aprt	0.042522724	0.055553318	0.119865014	0.067236876
FBgn0031055	65.64821406	1	et	0.54739094	0.479115797	0.275223839	0.180436947
FBgn0264494	65.5946346	1	CG17646	0.528635001	1.086045047	0.445831118	0.552168345
FBgn0031247	65.51031071	1	CG11562	0.264001146	0.153002448	0.223229047	0.147725416
FBgn0032170	65.39980731	1	CG4658	0.686254869	0.864972768	0.786953089	0.922292322
FBgn0028292	65.3134506	1	ric8a	0.168118217	0.307448145	0.370468274	0.371452325
FBgn0026378	65.19560512	1	Rep	0.264469995	0.304907505	0.319242221	0.455562076
FBgn0067102	65.19553423	1	GlcT	0.21612449	0.226954016	0.214741409	0.190883396
FBgn0263080	65.1666393	1	CG43348	0.022015225	0.028220862	0.089228463	0.031112331
FBgn0036397	65.05224913	1	Nprl3	0.055759965	0.051445033	0.04705541	0.040161779
FBgn0032702	65.02606984	1	CG10376	0.237091411	0.386479082	0.349537124	0.486713494
FBgn0042083	65.01537357	1	Mccc2	0.092909268	0.031274558	0.049077149	0.025076555
FBgn0015776	64.92213313	1	nrv1	0.689351349	0.889263353	0.727156191	0.767275549
FBgn0037231	64.8591131	1	Vps24	0.51658245	0.610516564	0.715785221	0.969151474
FBgn0032149	64.8222532	1	CG4036	0.182055067	0.076511227	0.059468882	0.03932333
FBgn0025381	64.81629539	1	rush	0.266074328	0.417658342	0.159238378	0.203682838
FBgn0014092	64.78907352	1	CG4278	0.127501842	0.070663346	0.12028203	0.037965759
FBgn0000996	64.73513645	1	dup	0.168270865	0.060808294	0.067048239	0.028655213
FBgn0032907	64.70589022	1	CG9272	0.026270192	0.012221139	0.007193041	0.014928211
FBgn0034618	64.69219261	1	CG9485	0.151156561	0.042305562	0.069947081	0.124765829
FBgn0029911	64.64189219	1	CG14435	0.152940233	0.179446013	0.203074771	0.362402502
FBgn0014930	64.63539292	1	CG2846	0.443415088	0.567072056	0.634435211	0.686740665
FBgn0266411	64.56083083	1	sima	0.400718551	0.362701878	0.35685018	0.512511369
FBgn0030943	64.42804508	1	Nup35	0.529492648	0.378975348	0.317552407	0.157136833
FBgn0051678	64.33838876	1	CG31678	0.177744569	0.318920824	0.347351204	0.246606777
FBgn0034033	64.246868	1	CG8204	0.195419801	0.154404137	0.16324814	0.115868757
FBgn0266111	64.24009373	1	ana3	0.075121607	0.026218218	0.029610415	0.018213462
FBgn0031478	64.22184732	1	CG8814	0.274113954	0.226171692	0.236712033	0.354496589
FBgn0031598	64.12249306	1	Vps53	0.081409866	0.059808038	0.079192541	0.120308742
FBgn0037478	64.05452359	1	CG2656	0.161153057	0.208683832	0.199385692	0.157845229
FBgn0039187	64.0083305	1	CG6454	0.222371736	0.26855261	0.341327266	0.413931495
FBgn0011205	63.86973796	1	fbl	0.333984173	0.330885816	0.386997609	0.473784914
FBgn0260226	63.84900659	1	CG42500	0.015055483	0.010754671	0.013491087	0.004070644
FBgn0005278	63.80476765	1	Sam-S	1.203188496	0.844959642	0.835723037	0.757251721
FBgn0031871	63.59687831	1	Fgop2	0.112270896	0.170286474	0.137452687	0.113954319
FBgn0086444	63.56729504	1	l(2)37Cb	0.116882988	0.075701796	0.095619885	0.043700935
FBgn0051637	63.46718632	1	CG31637	0.901199826	0.475898681	0.375440231	0.180805291
FBgn0010651	63.45577003	1	MFS14	0.320897753	0.231670437	0.180716992	0.388585322
FBgn0032587	63.45283898	1	CG5953	0.314002783	0.496039909	0.22768143	0.191576427
FBgn0266632	63.27969609	1	asRNA:CR45139	0.066307092	0.069853802	0.080283604	0.04527099
FBgn0039730	63.27287128	1	CG7903	0.156569264	0.232408532	0.183594416	0.287054891
FBgn0023214	63.27149053	1	edl	1.052004304	0.889155031	0.992179207	1.398109271
FBgn0015031	63.235579	1	cype	5.157904428	4.093756578	5.140004076	3.519411289
FBgn0283437	63.22898699	1	PPO1	3.482370119	2.835349144	2.317425637	2.295689116
FBgn0023517	63.21266821	1	Pgam5	0.280184742	0.285013641	0.29672139	0.242938296
FBgn0264501	63.19546995	1	lncRNA:CR43900	0.025433972	0.050477928	0.104718779	0.063793156
FBgn0035854	63.12777275	1	CG8005	0.149860071	0.143568182	0.1207317	0.025614073
FBgn0039427	62.99403634	1	CG5447	0.149407376	0.110390265	0.138481075	0.17140673
FBgn0030403	62.86064517	1	CG1824	0.25289312	0.22440039	0.178315879	0.164498535
FBgn0003041	62.85581503	1	pbl	0.694026407	0.365732485	0.374535829	0.335732077
FBgn0039266	62.75340121	1	CG11791	0.34296022	0.357983916	0.626869472	0.574987899
FBgn0011770	62.74965048	1	Gip	0.310690507	0.261261654	0.181071566	0.18658664
FBgn0052207	62.74186195	1	hpRNA:CR32207	0.122455525	0.11908814	0.076468104	0.063906903
FBgn0052380	62.71731953	1	SMSr	0.248389818	0.347527286	0.476307276	0.242841228
FBgn0038363	62.68863183	1	Acyp2	0.167324826	0.165999085	0.10724035	0.156296814
FBgn0052687	62.63521618	1	CG32687	0.019565561	0.014244613	0.007378981	0.009353555
FBgn0052369	62.61638695	1	CG32369	0.326022994	0.535225089	0.336858556	0.422834716
FBgn0023083	62.61318579	1	fray	0.175343695	0.171042792	0.215124604	0.180109271
FBgn0004876	62.58353843	1	cdi	0.250058208	0.191120455	0.171977062	0.341357041
FBgn0032196	62.57607768	1	CG5708	0.248640725	0.238656748	0.340742645	0.458685647
FBgn0058002	62.52326459	1	ND-AGGG	1.253771157	1.21704493	1.194986962	1.030355493
FBgn0260959	62.48403528	1	MCPH1	0.269232004	0.177432693	0.140399664	0.111934397
FBgn0010342	62.47572199	1	Map60	0.407953881	0.270084924	0.176919887	0.178447589
FBgn0020545	62.47371725	1	kraken	0.223519496	0.263902469	0.50681485	0.327593136
FBgn0002932	62.45409661	1	neur	0.076938636	0.039812674	0.035593211	0.017347352
FBgn0038446	62.26301618	1	CG14903	0.219729069	0.297962952	0.417816338	0.399206207
FBgn0038593	62.22019357	1	Vps39	0.1514814	0.286524371	0.282754703	0.29627357
FBgn0037548	62.10245869	1	CG7900	0.093999963	0.052742731	0.072377121	0.020307909
FBgn0004510	62.06279116	1	Ets97D	0.151036369	0.095744547	0.13114967	0.094364393
FBgn0278598	62.05184967	1	lncRNA:CR46268	0.06524409	0.079712074	0.046079772	0.057467355
FBgn0042111	62.02483245	1	CG18766	0.134380152	0.160446644	0.178661906	0.268512499
FBgn0033244	61.99174115	1	CG8726	0.366508683	0.386454213	0.498631752	0.809845896
FBgn0046114	61.99057355	1	Gclm	0.324553294	0.276803254	0.157420396	0.219876399
FBgn0063667	61.95111703	1	CG32335	0.032267837	0.05568813	0.034295574	0.047078809
FBgn0031566	61.9504867	1	CG2818	0.379645083	0.562701595	0.551074715	0.942583947
FBgn0033402	61.9474975	1	Myd88	0.810276714	1.471680135	0.701077512	0.906096468
FBgn0040237	61.88756411	1	bor	0.268965362	0.21018008	0.311917152	0.124869983
FBgn0259742	61.88358152	1	CG42360	0.110751514	0.084337477	0.081662489	0.053485205
FBgn0036820	61.88029233	1	Grx1	0.116603535	0.104500479	0.217011635	0.171202667
FBgn0033802	61.80787588	1	CG17724	0.070171582	0.041656073	0.034244903	0.019302027
FBgn0262945	61.80426705	1	lncRNA:CR43264	0.146666395	0.063029494	0.084098397	0.044879531
FBgn0000116	61.74311809	1	Argk	0.033516769	0.039430565	0.019069433	0.027234468
FBgn0021944	61.71438158	1	Coprox	0.589972258	0.499266227	0.539953855	0.672052282
FBgn0032293	61.68511422	1	Dpy-30L1	0.242423101	0.264229272	0.25640876	0.190279989
FBgn0035023	61.68249483	1	ITP	0.386610197	0.281978806	0.199901798	0.206870973
FBgn0265177	61.52926294	1	CG44242	0.746232602	0.69284265	0.700843385	0.795348148
FBgn0038853	61.45250534	1	RhoGAP93B	0.101173859	0.182366399	0.140589918	0.11355799
FBgn0001257	61.34390687	1	ImpL2	0.082026608	0.201855512	0.120939605	0.093529794
FBgn0262866	61.30334708	1	S6kII	0.137212619	0.125637992	0.136686636	0.095538232
FBgn0038659	61.28739071	1	EndoA	0.452636696	0.515153906	0.845491654	0.700337057
FBgn0052062	61.25256716	1	Rbfox1	0.369585627	0.202747628	0.174906028	0.229965919
FBgn0260444	61.23953019	1	Not10	0.139217375	0.104887059	0.137360892	0.122473516
FBgn0000394	61.03601078	1	cv	0.292916552	0.343526842	0.226769906	0.300602486
FBgn0039025	60.80553714	1	Usp12-46	0.119065215	0.262751815	0.254920769	0.350415906
FBgn0039590	60.67040941	1	CG10011	0.128898942	0.22784993	0.206275488	0.271293112
FBgn0036333	60.6472118	1	MICAL-like	0.409405135	0.578918995	0.609901591	0.665619291
FBgn0002773	60.59222664	1	Mlc2	0.195927872	0.206971436	0.105375634	0.069905609
FBgn0259978	60.58026945	1	vlc	0.288521876	0.386495408	0.358476736	0.536356664
FBgn0266711	60.54548987	1	EloC	0.732941774	0.700763904	0.730844763	0.859271579
FBgn0038407	60.3896625	1	CG6126	0.494219857	0.366411264	0.548196372	0.482619142
FBgn0029819	60.36943184	1	Usp30	0.255068158	0.299657854	0.483978454	0.415152775
FBgn0266724	60.23816991	1	Trs20	0.104625186	0.206528654	0.169588128	0.186669702
FBgn0259209	60.22910971	1	Mlp60A	0.120924548	0.144088742	0.081686241	0.104850811
FBgn0014417	60.21114937	1	CG13397	0.029273621	0.021699777	0.019447795	0.02625411
FBgn0024698	60.18487376	1	Cpsf160	0.17001424	0.154015861	0.128323591	0.11034797
FBgn0003423	60.17329527	1	slgA	0.067551127	0.064501889	0.071656934	0.031240545
FBgn0037734	60.1351456	1	trbd	0.050016476	0.075958314	0.060378412	0.091364012
FBgn0003435	60.10923419	1	sm	0.019548618	0.036585854	0.008529012	0.006190348
FBgn0030694	60.09155927	1	CG15602	0.153661662	0.255277771	0.25229294	0.296680003
FBgn0002565	60.0830579	1	Lsp2	0.12703674	0.110384235	0.078894668	0.059011752
FBgn0030809	60.07092597	1	Ubr1	0.269490413	0.253795346	0.208431887	0.237024079
FBgn0038532	60.05370599	1	CG14322	0.061681681	0.081787782	0.079841654	0.079284976
FBgn0035608	59.9629381	1	blanks	0.007690436	0.008593293	0.00297079	0.003680859
FBgn0034392	59.89847636	1	MFS15	0.557793379	0.794385828	0.381232053	0.299323342
FBgn0053145	59.86472896	1	GalT1	0.110957025	0.112202411	0.129652008	0.13527539
FBgn0039733	59.78474816	1	CG11504	0.180138016	0.152006773	0.135323921	0.151946227
FBgn0031990	59.74956836	1	PAPLA1	0.335808326	0.52312752	0.436773477	0.650061506
FBgn0038020	59.67281619	1	GstD9	0.283092816	0.253107638	0.355537122	0.35333398
FBgn0033607	59.67265443	1	CG9062	0.116156816	0.116089396	0.101414614	0.107704139
FBgn0039665	59.6162288	1	CG2310	0.344930119	0.411646486	0.272563863	0.335115037
FBgn0039559	59.54069199	1	NSD	0.176950926	0.135606356	0.133080365	0.137449394
FBgn0032863	59.52872876	1	Cdc23	0.125965209	0.088664295	0.06576486	0.065007617
FBgn0266053	59.51823448	1	Patr-1	0.222640888	0.321727579	0.302681758	0.287241284
FBgn0266549	59.50477291	1	lncRNA:CR45102	0.27601738	0.219452053	0.162346426	0.211468666
FBgn0036641	59.08016617	1	Smn	0.159601785	0.112732574	0.084256193	0.071580444
FBgn0023509	59.05281546	1	mip130	0.202848231	0.16010925	0.11041174	0.11758982
FBgn0052022	59.01992783	1	CG32022	0.174808298	0.185663115	0.247658316	0.124283043
FBgn0262035	59.00217268	1	CG42846	0.039613582	0.059958031	0.059588455	0.060296852
FBgn0030687	58.86368151	1	RpIIIC160	0.128570057	0.078470785	0.096456021	0.084233103
FBgn0040336	58.85383757	1	Seipin	0.098985613	0.104274296	0.109116857	0.12422143
FBgn0264982	58.85095179	1	lncRNA:CR44133	0.213506532	0.271911101	0.303315825	0.225498732
FBgn0030737	58.84722208	1	NA	0.021223292	0.011096001	0.004849717	0.003313698
FBgn0026192	58.84521282	1	par-6	0.169474081	0.188805146	0.254429559	0.239241854
FBgn0035295	58.80360135	1	Cnb	0.066274288	0.043677227	0.0346375	0.016422443
FBgn0035727	58.75876054	1	CG10063	0.006402134	0.004521597	0.008752506	0.002461237
FBgn0024491	58.68079148	1	Bin1	0.378108057	0.341779807	0.358175131	0.26813421
FBgn0004370	58.6752111	1	Ptp10D	0.17364219	0.121558047	0.099550658	0.15461102
FBgn0031054	58.59676304	1	Ssu72	0.194391413	0.128551918	0.178569037	0.170960772
FBgn0023514	58.58895034	1	CG14805	0.121684017	0.112387255	0.102500192	0.08359722
FBgn0002564	58.55409619	1	Lsp1gamma	0.055095658	0.062297116	0.027499134	0.024864608
FBgn0040324	58.38347153	1	Ephrin	0.343221787	0.412465552	0.271735659	0.506078141
FBgn0039741	58.37174107	1	CG7943	0.085475626	0.066221421	0.13371012	0.101662335
FBgn0051694	58.3653239	1	CG31694	0.376967036	0.442141047	0.32566821	0.497707201
FBgn0031601	58.3248624	1	Dim1	0.235966432	0.196404627	0.142370412	0.0974403
FBgn0035678	58.28374166	1	CG10469	0.111575989	0.085288412	0.081726892	0.130908024
FBgn0034796	58.27787992	1	CG3700	0.114924938	0.093340906	0.056526942	0.063476208
FBgn0031284	58.24445042	1	PGAP2	0.176252108	0.204946184	0.188629296	0.200286075
FBgn0284221	58.23669686	1	Sema5c	0.110903389	0.193182208	0.067427173	0.065919514
FBgn0030121	58.20299758	1	Cfp1	0.044713646	0.020562892	0.038565021	0.013715366
FBgn0039738	58.15716967	1	Mgat2	0.076434819	0.076028309	0.091642874	0.098050987
FBgn0262127	58.1545444	1	kibra	0.521807231	0.68524405	0.388574909	0.585876693
FBgn0030545	58.0848572	1	CG11590	0.401921408	0.252093805	0.172859283	0.125486706
FBgn0031882	57.98407628	1	Rab30	0.077610045	0.093587988	0.093687095	0.08994506
FBgn0000499	57.96329126	1	dsh	0.213725451	0.13980196	0.159884431	0.175386905
FBgn0029892	57.95072522	1	CG3184	0.097956636	0.083446128	0.034796451	0.075671757
FBgn0019932	57.91986017	1	SamDC	0.293578706	0.215534383	0.182831588	0.180296604
FBgn0019890	57.90237936	1	Smg5	0.328379184	0.377500389	0.355808445	0.509517242
FBgn0062413	57.88335942	1	Ctr1A	0.544311076	0.556051926	0.541624339	0.476852954
FBgn0038325	57.87036988	1	Atg4b	0.131056987	0.127365571	0.118140299	0.202235102
FBgn0040384	57.84141009	1	CG32795	0.11017354	0.057248301	0.068802424	0.035891919
FBgn0262617	57.81014279	1	Nuak1	0.080706042	0.05647993	0.079416173	0.139593132
FBgn0036063	57.79196715	1	CG6674	0.053189894	0.057003311	0.044249215	0.041222871
FBgn0032222	57.72438967	1	CG5037	0.193616271	0.19674148	0.242433252	0.11984781
FBgn0026143	57.68411191	1	CDC45L	0.122956943	0.082140874	0.090684403	0.038633243
FBgn0039685	57.63152549	1	Obp99b	0.122096699	0.130414543	0.139444779	0.105732987
FBgn0030352	57.55599661	1	sicily	0.101722241	0.088472813	0.089923556	0.055055928
FBgn0037578	57.49999496	1	CG9601	0.093689432	0.061548436	0.066571816	0.065072029
FBgn0025463	57.48722005	1	Bap60	0.296350964	0.237292671	0.204095593	0.132300762
FBgn0069923	57.39742975	1	CG41128	1.323783386	1.350815194	1.681030383	1.054658461
FBgn0086895	57.367182	1	pea	0.159046878	0.164232992	0.213032776	0.221046207
FBgn0032445	57.33745583	1	CG6153	0.131778836	0.129857839	0.136477287	0.1138908
FBgn0015793	57.33465502	1	Rab19	0.091955687	0.138341482	0.103054144	0.165475702
FBgn0031099	57.32382896	1	CG17065	0.362681135	0.366256052	0.27511029	0.386301434
FBgn0002638	57.31212279	1	Rcc1	0.464634676	0.348406591	0.32796352	0.141255494
FBgn0039668	57.24442878	1	Trc8	0.145562822	0.166495969	0.238154999	0.150939593
FBgn0266674	57.23603922	1	Sec15	0.128444705	0.195101782	0.178198484	0.198280853
FBgn0022338	57.135612	1	dnk	0.264487348	0.212394085	0.176713568	0.092721634
FBgn0010762	57.13278607	1	simj	0.334004844	0.179198133	0.17351393	0.081850974
FBgn0037621	57.10940586	1	M1BP	0.214335804	0.23526843	0.191992311	0.114456788
FBgn0261238	57.06146592	1	Alh	0.28429986	0.347119955	0.282581835	0.089790056
FBgn0086657	57.02759544	1	IKKepsilon	0.236473386	0.268647096	0.301792466	0.241061492
FBgn0002643	56.99465692	1	mam	0.436023269	0.392150991	0.294125048	0.460091475
FBgn0260749	56.97595162	1	Utx	0.268695758	0.331571506	0.315450335	0.348721815
FBgn0016694	56.90423419	1	Pdp1	0.51316813	0.336050955	0.341956882	0.410141713
FBgn0038437	56.840981	1	Sdhaf3	0.190571824	0.149644818	0.154998547	0.102825241
FBgn0031897	56.65530694	1	CG13784	0.041017879	0.040396171	0.029475335	0.026891875
FBgn0267534	56.6480212	1	asRNA:CR45874	0.046576775	0.063039812	0.040184713	0.032199735
FBgn0051648	56.63778501	1	CG31648	0.165547232	0.147693363	0.148088212	0.095488606
FBgn0031535	56.61301532	1	CG12795	0.171132597	0.26729464	0.240225515	0.11308966
FBgn0030653	56.47963069	1	CG7860	0.219207712	0.181930952	0.115586428	0.122111233
FBgn0033367	56.38919296	1	PPO2	7.191154619	6.21900982	6.399762814	6.402384837
FBgn0030206	56.3322612	1	CG2889	0.071580347	0.052581042	0.059916978	0.073770004
FBgn0283499	56.29721365	1	InR	0.354080936	0.299528685	0.455999423	0.541958896
FBgn0260456	56.22622504	1	CG4806	0.29801672	0.213173515	0.218071822	0.097690529
FBgn0263106	56.0586539	1	DnaJ-1	0.338994655	0.377697659	0.407085369	0.42910966
FBgn0261722	56.04002162	1	fwe	0.246825204	0.246747353	0.23787094	0.221897515
FBgn0015799	56.00411593	1	Rbf	0.345273818	0.313213995	0.377173863	0.248062231
FBgn0259745	55.9958911	1	wech	0.170567048	0.086599097	0.106990474	0.115483103
FBgn0037883	55.92908055	1	CG14701	0.215653435	0.221231151	0.317756254	0.354951012
FBgn0040827	55.9236212	1	CG13315	0.245837185	0.450244113	0.26414413	0.251705816
FBgn0014022	55.77193638	1	Rlb1	0.089568336	0.074422945	0.082588118	0.071498012
FBgn0031673	55.73560598	1	CG31650	0.498775435	0.502031101	0.361738919	0.284535509
FBgn0033683	55.71364001	1	CG18343	0.434871665	0.529492241	0.47185289	0.326783158
FBgn0036893	55.50649851	1	PIG-F	0.093935955	0.081957739	0.062484946	0.048191726
FBgn0037973	55.47498495	1	CG18547	0.247935984	0.231438837	0.213034357	0.233924882
FBgn0027610	55.28688575	1	Dic1	0.452368133	0.445370877	0.603557734	0.383642079
FBgn0261986	55.21487513	1	RASSF8	0.214876579	0.276700029	0.304279175	0.25051136
FBgn0029778	55.17875773	1	RhoGAP5A	0.120608766	0.134178728	0.087578877	0.09591462
FBgn0034365	55.16255688	1	CG5335	0.191537177	0.185338101	0.183567972	0.299432135
FBgn0285955	55.13598313	1	cv-c	0.377086981	0.456401553	0.392730779	0.609919674
FBgn0036685	55.02497376	1	CG6664	0.174729959	0.180895557	0.162885995	0.195039458
FBgn0029944	54.99000821	1	Dok	0.111419172	0.194411701	0.277358539	0.277944627
FBgn0037885	54.66880419	1	CG17721	0.15659348	0.163615488	0.125325164	0.08010234
FBgn0037081	54.52927876	1	barc	0.230174173	0.205759639	0.204837138	0.202509361
FBgn0037376	54.48852714	1	Hat1	0.328974823	0.244058314	0.242352845	0.150639123
FBgn0035247	54.44073196	1	metl	0.161568244	0.113933238	0.117646508	0.083167839
FBgn0029666	54.34700802	1	CG10803	0.248044966	0.213182053	0.14715058	0.272883341
FBgn0034371	54.34404346	1	Ntan1	0.173580619	0.120356915	0.110252409	0.121526336
FBgn0052756	54.328008	1	CG32756	0.100902004	0.157042766	0.095201594	0.2362648
FBgn0039212	54.23471512	1	Syx18	0.224503965	0.271163696	0.2602665	0.240852726
FBgn0037659	54.13707442	1	Kdm2	0.221819195	0.137568789	0.075237534	0.090446247
FBgn0261787	54.05975985	1	brun	0.133701538	0.21529365	0.12868666	0.14398334
FBgn0033224	54.04117348	1	Nop17l	0.269297646	0.177595403	0.139409229	0.17334815
FBgn0030724	54.00187512	1	Nipsnap	0.264838212	0.191814993	0.234741589	0.23656599
FBgn0033638	53.90770989	1	CG9005	0.238316809	0.241913584	0.207259242	0.262177859
FBgn0025634	53.88235945	1	CG13367	0.14383438	0.091242871	0.102401994	0.066981487
FBgn0034963	53.87950076	1	Not11	0.119637986	0.130027986	0.148484671	0.089376481
FBgn0052202	53.87680779	1	CG32202	0.070184618	0.092777528	0.073738279	0.05865786
FBgn0034435	53.82420925	1	fest	0.001436806	0.008061577	0.00113791	0.002638193
FBgn0263442	53.79741253	1	asRNA:CR43465	0.194520793	0.186769772	0.285275321	0.333252947
FBgn0026059	53.75508832	1	Mhcl	0.514337298	0.389670308	0.326778524	0.331453678
FBgn0033665	53.71368485	1	Zip48C	0.128522744	0.144676743	0.087441894	0.041882189
FBgn0039240	53.45458195	1	CG3744	0.210169466	0.244961155	0.163947568	0.256851668
FBgn0031315	53.36987287	1	CG14341	0.172494852	0.229804027	0.192603389	0.201554343
FBgn0002723	53.08097834	1	Met	0.21186557	0.261885402	0.218339983	0.287070727
FBgn0038640	53.07417271	1	CG7706	0.069106601	0.072427725	0.100847726	0.091842335
FBgn0036484	53.04588436	1	Pex3	0.098947118	0.096244359	0.124068639	0.095735871
FBgn0040751	53.03137626	1	CG13018	0.249150605	0.246606708	0.184534524	0.100831464
FBgn0259722	52.97172128	1	CG42376	0.320684916	0.350440567	0.328237609	0.281571288
FBgn0051211	52.94414306	1	CG31211	0.193407946	0.194137262	0.157125761	0.166185123
FBgn0036695	52.82287085	1	Papst2	0.254958757	0.163704777	0.146379442	0.120307573
FBgn0030554	52.82274408	1	CG1434	0.104821996	0.068138703	0.115599613	0.093300704
FBgn0259170	52.79268027	1	alpha-Man-Ia	0.214833297	0.108091643	0.192990621	0.158376805
FBgn0264617	52.72352186	1	asRNA:CR43957	0.331888177	0.294622816	0.247024116	0.2034206
FBgn0036286	52.68237633	1	CG10616	0.276221435	0.376631682	0.324722036	0.359094676
FBgn0035189	52.64949655	1	CG9119	0.124571309	0.113117381	0.084811741	0.068780708
FBgn0264815	52.46661843	1	Pde1c	0.147110394	0.067310164	0.113089057	0.094260075
FBgn0001225	52.45453812	1	Hsp26	0.729329853	0.654603714	0.631919314	0.390704484
FBgn0266918	52.36527137	1	CG32486	0.145984411	0.155563289	0.106026309	0.150604118
FBgn0015576	52.28341396	1	alpha-Est8	0.103738801	0.069777938	0.14828291	0.089284081
FBgn0261647	52.27377268	1	Axud1	0.124175799	0.163102782	0.170082936	0.167186083
FBgn0032509	52.21696059	1	CG6523	0.595070626	0.543040593	0.537440161	0.428875008
FBgn0265974	52.20063794	1	ttv	0.381898161	0.339028241	0.284619845	0.28542331
FBgn0023508	51.6675741	1	Ocrl	0.362346977	0.386620661	0.524811009	0.696015798
FBgn0033268	51.59398217	1	Obp44a	0.025132523	0.02801916	0.011209299	0.011474435
FBgn0260965	51.54573022	1	CG42588	0.050742232	0.019960253	0.017935847	0.014965123
FBgn0020493	51.48923128	1	Dad	0.073731263	0.086467151	0.064634023	0.054739077
FBgn0010355	51.44312507	1	Taf1	0.237537564	0.22769351	0.200888722	0.152118897
FBgn0052428	51.32473905	1	CG32428	0.200602727	0.100876773	0.060266164	0.069693019
FBgn0024987	50.91846619	1	ssx	0.252550309	0.268995268	0.193685339	0.177015183
FBgn0033052	50.62602935	1	SCAP	0.243601053	0.242178247	0.263811611	0.179973957
FBgn0033468	49.92333112	1	CG1418	0.287451541	0.346053287	0.349436045	0.24596899
FBgn0026207	49.78879069	1	mbo	0.162912657	0.137660316	0.093929746	0.086098374
FBgn0086655	49.6582958	1	jing	0.042324273	0.051675242	0.035245892	0.013778691
FBgn0034997	49.34033686	1	CG3376	0.353235787	0.25056411	0.370223091	0.310748805
FBgn0010226	49.31809833	1	GstS1	0.033235686	0.019872733	0.021981801	0.012486417
FBgn0013279	49.08623284	1	Hsp70Bc	0.067483501	0.080711586	0.107993835	0.06270378
FBgn0003889	49.05422722	1	betaTub85D	0.019522806	0.005050745	0.00765702	0.00520303
FBgn0041147	48.82838589	1	ida	0.092627788	0.046080047	0.060845333	0.045764427
FBgn0030092	48.80581966	1	fh	0.126793648	0.159078229	0.111007525	0.082487471
FBgn0034814	48.28971913	1	CG9890	0.143046347	0.152658107	0.177823814	0.141366834
FBgn0033924	47.43885645	1	CG8613	0.103987827	0.092989448	0.076031734	0.100232288
FBgn0000640	47.39009323	1	Fbp2	0.322846044	0.285909454	0.180590834	0.174938833
FBgn0033734	46.94819017	1	CG8520	0.153877165	0.081489578	0.110059188	0.105552948
FBgn0030327	46.80481717	1	FucT6	0.208142654	0.233130174	0.204091477	0.214284261
FBgn0028476	46.28342313	1	Usp1	0.119919194	0.122494832	0.094965855	0.110240895
FBgn0031068	46.16941316	1	Alr	0.168143758	0.113913388	0.133145315	0.087879925
[truncated: 1 more rows]
