# Supplementary material for: Constitutive activation of cellular immunity underlies the evolution of resistance to infection in Drosophila
Source: eLife. 2020 Dec 24;9:e59095. doi: 10.7554/eLife.59095 (PMC7785293; doi:10.7554/eLife.59095)
Supplement: Supplementary file 6. [file elife-59095-supp6.xlsx]

## Sheet: Number of genes
Upregulated cluster	Number of genes
LAM1	207
LAM3	396

## Sheet: GO
Upregulated cluster	Ontology	GO Term	p-Value i	Matches
LAM3	BP	regulation of biological quality [GO:0065008]	0.000275848	104	FBgn0000042	FBgn0000064	FBgn0000253	FBgn0000256	FBgn0000547	FBgn0000579	FBgn0000723	FBgn0001092	FBgn0001122	FBgn0001186	FBgn0001624	FBgn0001961	FBgn0001987	FBgn0002868	FBgn0003074	FBgn0003205	FBgn0003371	FBgn0003514	FBgn0003660	FBgn0004397	FBgn0004456	FBgn0004611	FBgn0004636	FBgn0004657	FBgn0010051	FBgn0010238	FBgn0010379	FBgn0010395	FBgn0010397	FBgn0010894	FBgn0011817	FBgn0013720	FBgn0013733	FBgn0013759	FBgn0014009	FBgn0014011	FBgn0014133	FBgn0015765	FBgn0015872	FBgn0017558	FBgn0019968	FBgn0020510	FBgn0020653	FBgn0027508	FBgn0028427
LAM3	BP	cell communication [GO:0007154]	0.000709545	111	FBgn0000097	FBgn0000253	FBgn0000273	FBgn0000547	FBgn0000723	FBgn0001105	FBgn0001122	FBgn0001624	FBgn0001987	FBgn0003093	FBgn0003205	FBgn0003206	FBgn0003218	FBgn0003371	FBgn0003660	FBgn0004507	FBgn0004611	FBgn0004636	FBgn0004657	FBgn0010051	FBgn0010379	FBgn0010395	FBgn0010424	FBgn0011817	FBgn0013733	FBgn0013759	FBgn0014009	FBgn0014011	FBgn0014133	FBgn0014906	FBgn0015589	FBgn0015765	FBgn0015795	FBgn0016672	FBgn0017581	FBgn0020249	FBgn0020251	FBgn0024150	FBgn0025631	FBgn0026090	FBgn0026374	FBgn0027508	FBgn0028427	FBgn0028546	FBgn0028984
LAM3	BP	signaling [GO:0023052]	0.00242	107	FBgn0000097	FBgn0000253	FBgn0000273	FBgn0000547	FBgn0000723	FBgn0001105	FBgn0001122	FBgn0001624	FBgn0001987	FBgn0003093	FBgn0003205	FBgn0003206	FBgn0003218	FBgn0003371	FBgn0003660	FBgn0004507	FBgn0004611	FBgn0004636	FBgn0004657	FBgn0010051	FBgn0010379	FBgn0010395	FBgn0010424	FBgn0011817	FBgn0013733	FBgn0013759	FBgn0014009	FBgn0014011	FBgn0014133	FBgn0014906	FBgn0015589	FBgn0015765	FBgn0015795	FBgn0016672	FBgn0017581	FBgn0020249	FBgn0020251	FBgn0024150	FBgn0025631	FBgn0026090	FBgn0026374	FBgn0027508	FBgn0028427	FBgn0028546	FBgn0028984
LAM3	BP	septate junction assembly [GO:0019991]	0.003177	17	FBgn0001122	FBgn0001624	FBgn0001987	FBgn0010238	FBgn0010894	FBgn0013720	FBgn0025631	FBgn0031268	FBgn0033032	FBgn0036198	FBgn0036299	FBgn0036433	FBgn0037240	FBgn0037680	FBgn0263289	FBgn0265413	FBgn0267488
LAM3	BP	tight junction assembly [GO:0120192]	0.003177	17	FBgn0001122	FBgn0001624	FBgn0001987	FBgn0010238	FBgn0010894	FBgn0013720	FBgn0025631	FBgn0031268	FBgn0033032	FBgn0036198	FBgn0036299	FBgn0036433	FBgn0037240	FBgn0037680	FBgn0263289	FBgn0265413	FBgn0267488
LAM3	BP	tight junction organization [GO:0120193]	0.003177	17	FBgn0001122	FBgn0001624	FBgn0001987	FBgn0010238	FBgn0010894	FBgn0013720	FBgn0025631	FBgn0031268	FBgn0033032	FBgn0036198	FBgn0036299	FBgn0036433	FBgn0037240	FBgn0037680	FBgn0263289	FBgn0265413	FBgn0267488
LAM3	BP	cell-cell junction assembly [GO:0007043]	0.005892	19	FBgn0001122	FBgn0001624	FBgn0001987	FBgn0004636	FBgn0010238	FBgn0010894	FBgn0013720	FBgn0025631	FBgn0031268	FBgn0033032	FBgn0036198	FBgn0036299	FBgn0036433	FBgn0037240	FBgn0037680	FBgn0262733	FBgn0263289	FBgn0265413	FBgn0267488
LAM3	BP	cell junction assembly [GO:0034329]	0.005892	19	FBgn0001122	FBgn0001624	FBgn0001987	FBgn0004636	FBgn0010238	FBgn0010894	FBgn0013720	FBgn0025631	FBgn0031268	FBgn0033032	FBgn0036198	FBgn0036299	FBgn0036433	FBgn0037240	FBgn0037680	FBgn0262733	FBgn0263289	FBgn0265413	FBgn0267488
LAM3	BP	cytoskeleton organization [GO:0007010]	0.010988	64	FBgn0000253	FBgn0000256	FBgn0000273	FBgn0000547	FBgn0000723	FBgn0001105	FBgn0001122	FBgn0001624	FBgn0001941	FBgn0001961	FBgn0002645	FBgn0003371	FBgn0003447	FBgn0003514	FBgn0003884	FBgn0003886	FBgn0003888	FBgn0003890	FBgn0004381	FBgn0004397	FBgn0004456	FBgn0004657	FBgn0010397	FBgn0010424	FBgn0013733	FBgn0013765	FBgn0014011	FBgn0014141	FBgn0015589	FBgn0019968	FBgn0020510	FBgn0024238	FBgn0025631	FBgn0026084	FBgn0026620	FBgn0027066	FBgn0028427	FBgn0029903	FBgn0031090	FBgn0034894	FBgn0035497	FBgn0037750	FBgn0038206	FBgn0041188	FBgn0041789
LAM3	BP	intracellular signal transduction [GO:0035556]	0.013769	52	FBgn0000253	FBgn0000273	FBgn0000547	FBgn0001122	FBgn0003093	FBgn0003205	FBgn0003206	FBgn0003371	FBgn0004611	FBgn0004636	FBgn0010379	FBgn0010424	FBgn0011817	FBgn0014009	FBgn0014011	FBgn0015765	FBgn0015795	FBgn0017581	FBgn0020249	FBgn0024150	FBgn0026090	FBgn0028546	FBgn0029095	FBgn0029131	FBgn0030286	FBgn0031030	FBgn0031090	FBgn0032821	FBgn0034894	FBgn0035142	FBgn0036742	FBgn0037647	FBgn0039466	FBgn0039747	FBgn0040206	FBgn0050115	FBgn0051158	FBgn0085390	FBgn0085443	FBgn0086370	FBgn0259228	FBgn0259243	FBgn0259483	FBgn0260945	FBgn0261547
LAM3	BP	apical junction assembly [GO:0043297]	0.014549	17	FBgn0001122	FBgn0001624	FBgn0001987	FBgn0010238	FBgn0010894	FBgn0013720	FBgn0025631	FBgn0031268	FBgn0033032	FBgn0036198	FBgn0036299	FBgn0036433	FBgn0037240	FBgn0037680	FBgn0263289	FBgn0265413	FBgn0267488
LAM3	BP	growth [GO:0040007]	0.017153	48	FBgn0000273	FBgn0000723	FBgn0001122	FBgn0001624	FBgn0003205	FBgn0003371	FBgn0003514	FBgn0003886	FBgn0004657	FBgn0010379	FBgn0010395	FBgn0011817	FBgn0013733	FBgn0013759	FBgn0014011	FBgn0014029	FBgn0014133	FBgn0017581	FBgn0020251	FBgn0020510	FBgn0028984	FBgn0031030	FBgn0032886	FBgn0032956	FBgn0033033	FBgn0034005	FBgn0034720	FBgn0035142	FBgn0037647	FBgn0041171	FBgn0085443	FBgn0259481	FBgn0259483	FBgn0260945	FBgn0262582	FBgn0262733	FBgn0263289	FBgn0263395	FBgn0263930	FBgn0264785	FBgn0266417	FBgn0266521	FBgn0267001	FBgn0267795	FBgn0267849
LAM3	BP	cell junction organization [GO:0034330]	0.024512	21	FBgn0001122	FBgn0001624	FBgn0001987	FBgn0004636	FBgn0010238	FBgn0010894	FBgn0013720	FBgn0014011	FBgn0020249	FBgn0025631	FBgn0031268	FBgn0033032	FBgn0036198	FBgn0036299	FBgn0036433	FBgn0037240	FBgn0037680	FBgn0262733	FBgn0263289	FBgn0265413	FBgn0267488
LAM3	BP	cell-cell junction organization [GO:0045216]	0.024512	21	FBgn0001122	FBgn0001624	FBgn0001987	FBgn0004636	FBgn0010238	FBgn0010894	FBgn0013720	FBgn0014011	FBgn0020249	FBgn0025631	FBgn0031268	FBgn0033032	FBgn0036198	FBgn0036299	FBgn0036433	FBgn0037240	FBgn0037680	FBgn0262733	FBgn0263289	FBgn0265413	FBgn0267488
LAM3	BP	cell adhesion [GO:0007155]	0.043828	31	FBgn0000097	FBgn0000547	FBgn0000636	FBgn0001105	FBgn0001122	FBgn0001624	FBgn0001961	FBgn0001987	FBgn0004397	FBgn0004456	FBgn0004636	FBgn0004657	FBgn0010238	FBgn0010395	FBgn0010894	FBgn0015229	FBgn0020249	FBgn0020510	FBgn0028427	FBgn0034005	FBgn0035498	FBgn0037240	FBgn0052528	FBgn0260442	FBgn0261261	FBgn0262733	FBgn0263118	FBgn0263289	FBgn0264491	FBgn0265991	FBgn0267001
LAM3	BP	biological adhesion [GO:0022610]	0.043828	31	FBgn0000097	FBgn0000547	FBgn0000636	FBgn0001105	FBgn0001122	FBgn0001624	FBgn0001961	FBgn0001987	FBgn0004397	FBgn0004456	FBgn0004636	FBgn0004657	FBgn0010238	FBgn0010395	FBgn0010894	FBgn0015229	FBgn0020249	FBgn0020510	FBgn0028427	FBgn0034005	FBgn0035498	FBgn0037240	FBgn0052528	FBgn0260442	FBgn0261261	FBgn0262733	FBgn0263118	FBgn0263289	FBgn0264491	FBgn0265991	FBgn0267001
LAM3	BP	muscle attachment [GO:0016203]	0.049578	12	FBgn0004456	FBgn0004657	FBgn0013733	FBgn0014011	FBgn0020510	FBgn0028427	FBgn0033504	FBgn0052528	FBgn0259228	FBgn0260442	FBgn0263118	FBgn0264491
LAM3	CC	plasma membrane [GO:0005886]	0.000199443	89	FBgn0000253	FBgn0000273	FBgn0000547	FBgn0000579	FBgn0000636	FBgn0000723	FBgn0001105	FBgn0001122	FBgn0001624	FBgn0001941	FBgn0001987	FBgn0003093	FBgn0003205	FBgn0003206	FBgn0003218	FBgn0003514	FBgn0003660	FBgn0004397	FBgn0004456	FBgn0004636	FBgn0004657	FBgn0010051	FBgn0010238	FBgn0010395	FBgn0010894	FBgn0014009	FBgn0014011	FBgn0014141	FBgn0014906	FBgn0015229	FBgn0015795	FBgn0015872	FBgn0020510	FBgn0024150	FBgn0025631	FBgn0027657	FBgn0027865	FBgn0028671	FBgn0029095	FBgn0029507	FBgn0029932	FBgn0030412	FBgn0031030	FBgn0031090	FBgn0031150
LAM3	CC	supramolecular fiber [GO:0099512]	0.000432231	33	FBgn0000064	FBgn0000256	FBgn0001091	FBgn0003514	FBgn0003884	FBgn0003886	FBgn0003888	FBgn0003890	FBgn0004381	FBgn0004387	FBgn0004657	FBgn0010397	FBgn0013733	FBgn0014141	FBgn0014869	FBgn0015589	FBgn0017581	FBgn0019968	FBgn0024238	FBgn0026620	FBgn0027066	FBgn0029903	FBgn0031030	FBgn0031037	FBgn0033926	FBgn0038206	FBgn0050069	FBgn0051363	FBgn0052311	FBgn0086355	FBgn0086708	FBgn0250906	FBgn0260442	FBgn0261565	FBgn0265487	FBgn0265991	FBgn0266417
LAM3	CC	supramolecular polymer [GO:0099081]	0.000962371	33	FBgn0000064	FBgn0000256	FBgn0001091	FBgn0003514	FBgn0003884	FBgn0003886	FBgn0003888	FBgn0003890	FBgn0004381	FBgn0004387	FBgn0004657	FBgn0010397	FBgn0013733	FBgn0014141	FBgn0014869	FBgn0015589	FBgn0017581	FBgn0019968	FBgn0024238	FBgn0026620	FBgn0027066	FBgn0029903	FBgn0031030	FBgn0031037	FBgn0033926	FBgn0038206	FBgn0050069	FBgn0051363	FBgn0052311	FBgn0086355	FBgn0086708	FBgn0250906	FBgn0260442	FBgn0261565	FBgn0265487	FBgn0265991	FBgn0266417
LAM3	CC	cell periphery [GO:0071944]	0.001071	97	FBgn0000253	FBgn0000256	FBgn0000273	FBgn0000547	FBgn0000579	FBgn0000636	FBgn0000723	FBgn0001105	FBgn0001122	FBgn0001624	FBgn0001941	FBgn0001987	FBgn0003093	FBgn0003205	FBgn0003206	FBgn0003218	FBgn0003514	FBgn0003660	FBgn0004397	FBgn0004456	FBgn0004636	FBgn0004657	FBgn0010051	FBgn0010238	FBgn0010379	FBgn0010395	FBgn0010894	FBgn0014009	FBgn0014011	FBgn0014029	FBgn0014141	FBgn0014906	FBgn0015229	FBgn0015795	FBgn0015872	FBgn0020304	FBgn0020510	FBgn0024150	FBgn0024238	FBgn0025631	FBgn0027657	FBgn0027865	FBgn0028671	FBgn0029095	FBgn0029507
LAM3	CC	cytoplasm [GO:0005737]	0.003019	193	FBgn0000064	FBgn0000097	FBgn0000253	FBgn0000256	FBgn0000273	FBgn0000318	FBgn0000547	FBgn0000579	FBgn0000636	FBgn0001091	FBgn0001092	FBgn0001149	FBgn0001186	FBgn0001258	FBgn0001624	FBgn0001941	FBgn0003074	FBgn0003076	FBgn0003218	FBgn0003371	FBgn0003447	FBgn0003514	FBgn0003660	FBgn0003748	FBgn0003884	FBgn0003886	FBgn0003888	FBgn0003890	FBgn0004387	FBgn0004507	FBgn0004657	FBgn0010039	FBgn0010051	FBgn0010379	FBgn0011232	FBgn0011817	FBgn0013733	FBgn0014009	FBgn0014011	FBgn0014029	FBgn0014133	FBgn0014141	FBgn0014869	FBgn0015589	FBgn0015765
LAM3	CC	cell junction [GO:0030054]	0.01581	27	FBgn0000547	FBgn0000636	FBgn0000723	FBgn0001624	FBgn0001987	FBgn0003514	FBgn0004397	FBgn0004456	FBgn0004657	FBgn0010238	FBgn0010395	FBgn0010894	FBgn0013720	FBgn0013733	FBgn0020249	FBgn0025631	FBgn0028427	FBgn0033032	FBgn0036198	FBgn0036299	FBgn0037240	FBgn0041789	FBgn0051158	FBgn0052528	FBgn0085354	FBgn0260442	FBgn0263289	FBgn0265991	FBgn0267488
LAM3	CC	anchoring junction [GO:0070161]	0.01581	27	FBgn0000547	FBgn0000636	FBgn0000723	FBgn0001624	FBgn0001987	FBgn0003514	FBgn0004397	FBgn0004456	FBgn0004657	FBgn0010238	FBgn0010395	FBgn0010894	FBgn0013720	FBgn0013733	FBgn0020249	FBgn0025631	FBgn0028427	FBgn0033032	FBgn0036198	FBgn0036299	FBgn0037240	FBgn0041789	FBgn0051158	FBgn0052528	FBgn0085354	FBgn0260442	FBgn0263289	FBgn0265991	FBgn0267488
LAM3	CC	focal adhesion [GO:0005925]	0.03351	11	FBgn0004397	FBgn0004456	FBgn0004657	FBgn0010395	FBgn0020249	FBgn0028427	FBgn0041789	FBgn0052528	FBgn0085354	FBgn0260442	FBgn0265991
LAM3	CC	septate junction [GO:0005918]	0.033816	13	FBgn0000636	FBgn0001624	FBgn0001987	FBgn0010238	FBgn0010894	FBgn0013720	FBgn0025631	FBgn0033032	FBgn0036198	FBgn0036299	FBgn0037240	FBgn0263289	FBgn0267488
LAM3	MF	purine nucleoside binding [GO:0001883]	0.044308	18	FBgn0001122	FBgn0003205	FBgn0003206	FBgn0003884	FBgn0003886	FBgn0003888	FBgn0003890	FBgn0004636	FBgn0014009	FBgn0014011	FBgn0014029	FBgn0015795	FBgn0026479	FBgn0031090	FBgn0037647	FBgn0053056	FBgn0259923	FBgn0284257
LAM1	BP	response to biotic stimulus [GO:0009607]	0.007904	30	FBgn0000279	FBgn0001114	FBgn0001226	FBgn0002526	FBgn0003495	FBgn0004362	FBgn0010228	FBgn0012037	FBgn0014018	FBgn0015221	FBgn0016917	FBgn0027594	FBgn0028542	FBgn0028990	FBgn0029093	FBgn0029167	FBgn0031888	FBgn0031973	FBgn0032006	FBgn0032638	FBgn0033402	FBgn0033438	FBgn0036891	FBgn0038299	FBgn0041183	FBgn0043841	FBgn0243514	FBgn0259896	FBgn0261800	FBgn0266569
LAM1	BP	response to external biotic stimulus [GO:0043207]	0.007904	30	FBgn0000279	FBgn0001114	FBgn0001226	FBgn0002526	FBgn0003495	FBgn0004362	FBgn0010228	FBgn0012037	FBgn0014018	FBgn0015221	FBgn0016917	FBgn0027594	FBgn0028542	FBgn0028990	FBgn0029093	FBgn0029167	FBgn0031888	FBgn0031973	FBgn0032006	FBgn0032638	FBgn0033402	FBgn0033438	FBgn0036891	FBgn0038299	FBgn0041183	FBgn0043841	FBgn0243514	FBgn0259896	FBgn0261800	FBgn0266569
LAM1	BP	response to other organism [GO:0051707]	0.007904	30	FBgn0000279	FBgn0001114	FBgn0001226	FBgn0002526	FBgn0003495	FBgn0004362	FBgn0010228	FBgn0012037	FBgn0014018	FBgn0015221	FBgn0016917	FBgn0027594	FBgn0028542	FBgn0028990	FBgn0029093	FBgn0029167	FBgn0031888	FBgn0031973	FBgn0032006	FBgn0032638	FBgn0033402	FBgn0033438	FBgn0036891	FBgn0038299	FBgn0041183	FBgn0043841	FBgn0243514	FBgn0259896	FBgn0261800	FBgn0266569
LAM1	BP	basement membrane organization [GO:0071711]	0.010577	8	FBgn0000299	FBgn0002526	FBgn0011828	FBgn0016075	FBgn0026562	FBgn0033438	FBgn0261800	FBgn0267348
LAM1	BP	defense response [GO:0006952]	0.032537	27	FBgn0000279	FBgn0001114	FBgn0001226	FBgn0002526	FBgn0003495	FBgn0004362	FBgn0010228	FBgn0014018	FBgn0016917	FBgn0027594	FBgn0028542	FBgn0028990	FBgn0029093	FBgn0029167	FBgn0031888	FBgn0031973	FBgn0032006	FBgn0032638	FBgn0033402	FBgn0033438	FBgn0041183	FBgn0043841	FBgn0243514	FBgn0259896	FBgn0261800	FBgn0266569	FBgn0287423
LAM1	BP	defense response to other organism [GO:0098542]	0.048549	26	FBgn0000279	FBgn0001114	FBgn0001226	FBgn0002526	FBgn0003495	FBgn0004362	FBgn0010228	FBgn0014018	FBgn0016917	FBgn0027594	FBgn0028542	FBgn0028990	FBgn0029093	FBgn0029167	FBgn0031888	FBgn0031973	FBgn0032006	FBgn0032638	FBgn0033402	FBgn0033438	FBgn0041183	FBgn0043841	FBgn0243514	FBgn0259896	FBgn0261800	FBgn0266569
LAM1	CC	extracellular region [GO:0005576]	5.31372e-12	56	FBgn0000279	FBgn0000299	FBgn0000719	FBgn0001114	FBgn0001218	FBgn0002526	FBgn0003137	FBgn0003495	FBgn0004449	FBgn0004629	FBgn0010225	FBgn0010470	FBgn0011722	FBgn0011828	FBgn0012037	FBgn0013763	FBgn0015221	FBgn0016075	FBgn0020414	FBgn0020415	FBgn0022702	FBgn0026562	FBgn0026721	FBgn0027598	FBgn0028514	FBgn0028542	FBgn0028990	FBgn0029093	FBgn0029167	FBgn0030362	FBgn0030521	FBgn0031327	FBgn0031888	FBgn0031973	FBgn0032638	FBgn0033438	FBgn0033649	FBgn0033725	FBgn0034753	FBgn0035076	FBgn0038250	FBgn0038299	FBgn0039759	FBgn0041183	FBgn0041629
LAM1	CC	extracellular space [GO:0005615]	6.20405e-09	35	FBgn0000279	FBgn0000299	FBgn0000719	FBgn0001218	FBgn0003495	FBgn0004629	FBgn0010470	FBgn0011828	FBgn0012037	FBgn0013763	FBgn0016075	FBgn0020415	FBgn0022702	FBgn0026562	FBgn0028514	FBgn0028990	FBgn0030362	FBgn0030521	FBgn0031327	FBgn0031888	FBgn0031973	FBgn0032638	FBgn0033438	FBgn0033649	FBgn0034753	FBgn0035076	FBgn0038299	FBgn0039759	FBgn0041183	FBgn0041629	FBgn0050414	FBgn0069056	FBgn0250848	FBgn0265048	FBgn0287423
LAM1	CC	basement membrane [GO:0005604]	0.00061144	9	FBgn0000299	FBgn0001114	FBgn0002526	FBgn0003137	FBgn0011722	FBgn0016075	FBgn0050046	FBgn0261800	FBgn0267348
LAM1	CC	collagen-containing extracellular matrix [GO:0062023]	0.001738	11	FBgn0000299	FBgn0001114	FBgn0002526	FBgn0003137	FBgn0011722	FBgn0011828	FBgn0016075	FBgn0026562	FBgn0050046	FBgn0261800	FBgn0267348
LAM1	CC	extracellular matrix [GO:0031012]	0.002145	15	FBgn0000299	FBgn0001114	FBgn0002526	FBgn0003137	FBgn0004449	FBgn0011722	FBgn0011828	FBgn0016075	FBgn0026562	FBgn0026721	FBgn0033438	FBgn0033725	FBgn0050046	FBgn0261800	FBgn0267348
LAM1	CC	small nucleolar ribonucleoprotein complex [GO:0005732]	0.007252	6	FBgn0003062	FBgn0011824	FBgn0026196	FBgn0033548	FBgn0038964	FBgn0259937
LAM1	MF	peptidase activity [GO:0008233]	0.004279	22	FBgn0003137	FBgn0012037	FBgn0028514	FBgn0029093	FBgn0030521	FBgn0030796	FBgn0032638	FBgn0032864	FBgn0033438	FBgn0033469	FBgn0034139	FBgn0034221	FBgn0035076	FBgn0036891	FBgn0038250	FBgn0039759	FBgn0042106	FBgn0050414	FBgn0051219	FBgn0053465	FBgn0069056	FBgn0085466	FBgn0250848	FBgn0260477	FBgn0262588	FBgn0265140
LAM1	MF	peptidase activity, acting on L-amino acid peptides [GO:0070011]	0.010277	21	FBgn0012037	FBgn0028514	FBgn0029093	FBgn0030521	FBgn0030796	FBgn0032638	FBgn0032864	FBgn0033438	FBgn0033469	FBgn0034139	FBgn0034221	FBgn0035076	FBgn0036891	FBgn0038250	FBgn0039759	FBgn0042106	FBgn0050414	FBgn0051219	FBgn0053465	FBgn0069056	FBgn0085466	FBgn0250848	FBgn0260477	FBgn0262588	FBgn0265140
[truncated: 148 more columns]

## Sheet: Pathway
Upregulated cluster	Pathways	p-Value i	Matches
LAM3	Signal Transduction	0.011099	57	FBgn0000097	FBgn0000253	FBgn0000273	FBgn0001105	FBgn0001122	FBgn0001624	FBgn0001961	FBgn0003093	FBgn0003205	FBgn0003371	FBgn0004397	FBgn0004611	FBgn0004636	FBgn0004657	FBgn0010051	FBgn0010379	FBgn0010395	FBgn0010424	FBgn0011817	FBgn0014011	FBgn0015589	FBgn0015765	FBgn0017558	FBgn0017581	FBgn0024150	FBgn0025631	FBgn0026090	FBgn0026374	FBgn0027508	FBgn0028671	FBgn0030976	FBgn0031037	FBgn0032821	FBgn0032857	FBgn0036742	FBgn0037647	FBgn0039747	FBgn0040206	FBgn0041789	FBgn0050115	FBgn0052296	FBgn0085354	FBgn0085390	FBgn0086558	FBgn0259228	FBgn0259243
LAM3	Signaling by GPCR	0.025788	23	FBgn0000253	FBgn0000273	FBgn0001105	FBgn0001122	FBgn0003093	FBgn0003205	FBgn0004611	FBgn0010051	FBgn0010379	FBgn0010424	FBgn0024150	FBgn0025631	FBgn0032857	FBgn0036742	FBgn0039747	FBgn0040206	FBgn0050115	FBgn0085390	FBgn0259243	FBgn0261244	FBgn0261547	FBgn0261549	FBgn0261988
LAM3	GPCR downstream signalling	0.025788	23	FBgn0000253	FBgn0000273	FBgn0001105	FBgn0001122	FBgn0003093	FBgn0003205	FBgn0004611	FBgn0010051	FBgn0010379	FBgn0010424	FBgn0024150	FBgn0025631	FBgn0032857	FBgn0036742	FBgn0039747	FBgn0040206	FBgn0050115	FBgn0085390	FBgn0259243	FBgn0261244	FBgn0261547	FBgn0261549	FBgn0261988
LAM3	Hemostasis	0.038035	35	FBgn0000064	FBgn0000253	FBgn0000273	FBgn0001105	FBgn0003093	FBgn0003205	FBgn0003884	FBgn0003886	FBgn0003888	FBgn0003890	FBgn0004381	FBgn0004387	FBgn0004397	FBgn0004456	FBgn0004636	FBgn0004657	FBgn0010051	FBgn0010379	FBgn0010395	FBgn0010424	FBgn0014011	FBgn0028984	FBgn0031012	FBgn0034005	FBgn0035498	FBgn0036299	FBgn0036742	FBgn0041182	FBgn0052264	FBgn0085390	FBgn0259243	FBgn0260442	FBgn0261244	FBgn0261549	FBgn0267487
LAM3	Gluconeogenesis	0.041828	8	FBgn0000064	FBgn0000579	FBgn0001091	FBgn0003074	FBgn0014869	FBgn0027580	FBgn0086355	FBgn0250906
LAM1	Extracellular matrix organization	0.005463	13	FBgn0000299	FBgn0002526	FBgn0011828	FBgn0016075	FBgn0028990	FBgn0029167	FBgn0033438	FBgn0034880	FBgn0035452	FBgn0038299	FBgn0261800	FBgn0265140	FBgn0267348
LAM1	Laminin interactions	0.016148	5	FBgn0000299	FBgn0002526	FBgn0016075	FBgn0261800	FBgn0267348
[truncated: 11 more columns]
