# Supplementary material for: Constitutive activation of cellular immunity underlies the evolution of resistance to infection in Drosophila
Source: eLife. 2020 Dec 24;9:e59095. doi: 10.7554/eLife.59095 (PMC7785293; doi:10.7554/eLife.59095)
Supplement: Supplementary file 7. [file elife-59095-supp7.xlsx]

## Sheet: Sheet1
Round three hemocyte clustering, highly variable genes	Lamellocyte subclustering, highly variable genes	Round three hemocyte clustering, all detected genes
FBgn0033367	FBgn0032318	FBgn0040510
FBgn0283437	FBgn0266253	FBgn0033238
FBgn0263773	FBgn0261363	FBgn0069056
FBgn0030653	FBgn0002868	FBgn0040850
FBgn0035189	FBgn0010424	FBgn0031470
FBgn0002869	FBgn0263380	FBgn0035539
FBgn0035679	FBgn0040813	FBgn0035452
FBgn0264815	FBgn0283437	FBgn0038088
FBgn0002868	FBgn0037386	FBgn0052412
FBgn0032318	FBgn0003748	FBgn0004397
FBgn0266253	FBgn0013733	FBgn0033033
FBgn0039051	FBgn0262565	FBgn0261561
FBgn0014865	FBgn0029932	FBgn0263380
FBgn0262146	FBgn0032897	FBgn0265375
FBgn0002719	FBgn0085359	FBgn0050035
FBgn0053192	FBgn0010388	FBgn0034005
FBgn0030029	FBgn0030040	FBgn0038682
FBgn0010424	FBgn0014163	FBgn0015872
FBgn0263380	FBgn0031791	FBgn0037477
FBgn0261363	FBgn0026084	FBgn0038890
FBgn0283461	FBgn0283461	FBgn0032140
FBgn0036750	FBgn0003888	FBgn0030290
FBgn0063667	FBgn0035049	FBgn0038018
FBgn0003748	FBgn0032886	FBgn0085282
FBgn0037386	FBgn0001258	FBgn0259228
FBgn0013733	FBgn0033367	FBgn0039108
FBgn0011770	FBgn0053225	FBgn0053329
FBgn0027843	FBgn0003886	FBgn0024238
FBgn0085359	FBgn0010387	FBgn0003748
FBgn0030040	FBgn0040296	FBgn0026374
FBgn0040813	FBgn0039759	FBgn0010387
FBgn0032897	FBgn0038353	FBgn0028956
FBgn0001224	FBgn0034010	FBgn0034880
FBgn0029932	FBgn0033725	FBgn0036359
FBgn0003888	FBgn0037477	FBgn0264895
FBgn0003886	FBgn0029896	FBgn0260442
FBgn0034010	FBgn0002869	FBgn0053225
FBgn0032436	FBgn0038682	FBgn0031080
FBgn0031791	FBgn0001092	FBgn0040551
FBgn0053225	FBgn0031080	FBgn0030396
FBgn0026084	FBgn0033033	FBgn0085211
FBgn0031682	FBgn0050035	FBgn0033448
FBgn0262565	FBgn0264437	FBgn0034720
FBgn0010387	FBgn0265413	FBgn0022709
FBgn0014163	FBgn0029167	FBgn0035708
FBgn0035678	FBgn0001225	FBgn0034219
FBgn0032886	FBgn0014141	FBgn0034894
FBgn0003053	FBgn0015872	FBgn0003218
FBgn0001225	FBgn0000042	FBgn0038679
FBgn0039759	FBgn0034005	FBgn0030048
FBgn0001258	FBgn0035498	FBgn0032191
FBgn0035049	FBgn0033926	FBgn0261261
FBgn0038353	FBgn0000640	FBgn0003888
FBgn0040296	FBgn0000279	FBgn0028844
FBgn0010388	FBgn0015229	FBgn0035498
FBgn0037477	FBgn0004569	FBgn0260660
FBgn0032721	FBgn0028916	FBgn0001987
FBgn0038682	FBgn0032400	FBgn0038311
FBgn0031080	FBgn0264895	FBgn0000256
FBgn0050035	FBgn0051363	FBgn0085259
FBgn0000279	FBgn0264894	FBgn0041710
FBgn0035132	FBgn0030362	FBgn0040299
FBgn0000276	FBgn0029507	FBgn0036663
FBgn0265413	FBgn0032422	FBgn0040089
FBgn0052446	FBgn0262881	FBgn0020249
FBgn0000042	FBgn0013674	FBgn0004387
FBgn0015872	FBgn0027066	FBgn0028427
FBgn0032422	FBgn0034443	FBgn0265613
FBgn0034005	FBgn0039747	FBgn0015589
FBgn0001092	FBgn0267910	FBgn0012051
FBgn0035498	FBgn0036877	FBgn0032422
FBgn0033033	FBgn0001224	FBgn0013272
FBgn0033926	FBgn0001114	FBgn0085359
FBgn0264895	FBgn0001987	FBgn0041182
FBgn0014141	FBgn0004657	FBgn0004657
FBgn0023129	FBgn0042106	FBgn0014011
FBgn0029896	FBgn0001089	FBgn0033309
FBgn0262881	FBgn0016672	FBgn0010395
FBgn0011589	FBgn0003137	FBgn0015765
FBgn0062413	FBgn0085452	FBgn0038206
FBgn0051363	FBgn0033724	FBgn0010397
FBgn0031099	FBgn0001250	FBgn0028893
FBgn0033725	FBgn0041087	FBgn0033042
FBgn0000640	FBgn0011828	FBgn0265991
FBgn0027066	FBgn0262972	FBgn0259977
FBgn0015229	FBgn0031307	FBgn0029131
FBgn0028916	FBgn0034638	FBgn0033483
FBgn0036822	FBgn0261260	FBgn0040296
FBgn0029507	FBgn0260442	FBgn0033504
FBgn0004657	FBgn0004636	FBgn0035432
FBgn0004569	FBgn0031560	FBgn0039056
FBgn0034443	FBgn0029903	FBgn0033065
FBgn0028938	FBgn0030160	FBgn0262699
FBgn0004647	FBgn0259740	FBgn0030624
FBgn0029167	FBgn0261561	FBgn0266719
FBgn0039747	FBgn0262794	FBgn0031722
FBgn0264894	FBgn0040007	FBgn0041087
FBgn0001089	FBgn0003525	FBgn0053056
FBgn0030160	FBgn0029766	FBgn0013733
FBgn0032400	FBgn0040551	FBgn0038915
FBgn0267910	FBgn0040850	FBgn0032897
FBgn0013674	FBgn0025628	FBgn0040967
FBgn0000064	FBgn0033504	FBgn0037902
FBgn0041087	FBgn0027657	FBgn0085421
FBgn0260442	FBgn0020251	FBgn0000723
FBgn0001987	FBgn0039108	FBgn0259221
FBgn0036848	FBgn0051769	FBgn0033446
FBgn0000253	FBgn0067311	FBgn0031082
FBgn0033724	FBgn0038088	FBgn0029095
FBgn0042106	FBgn0031037	FBgn0040212
FBgn0036877	FBgn0266521	FBgn0053198
FBgn0004636	FBgn0014865	FBgn0262984
FBgn0261260	FBgn0262563	FBgn0050115
FBgn0016672	FBgn0265375	FBgn0033756
FBgn0032820	FBgn0037167	FBgn0024150
FBgn0265052	FBgn0033635	FBgn0032886
FBgn0030362	FBgn0000083	FBgn0003886
FBgn0085452	FBgn0030396	FBgn0028984
FBgn0001230	FBgn0000253	FBgn0263118
FBgn0261561	FBgn0086355	FBgn0026189
FBgn0264437	FBgn0053494	FBgn0053868
FBgn0031307	FBgn0037387	FBgn0038243
FBgn0039052	FBgn0000299	FBgn0037296
FBgn0030396	FBgn0004456	FBgn0041585
FBgn0034638	FBgn0053056	FBgn0032731
FBgn0029903	FBgn0036742	FBgn0029903
FBgn0029174	FBgn0015589	FBgn0037844
FBgn0039108	FBgn0261261	FBgn0037623
FBgn0033504	FBgn0038679	FBgn0262565
FBgn0000083	FBgn0031016	FBgn0031213
FBgn0027657	FBgn0053192	FBgn0033649
FBgn0000277	FBgn0003447	FBgn0037750
FBgn0053494	FBgn0036262	FBgn0027066
FBgn0004456	FBgn0034724	FBgn0016059
FBgn0265375	FBgn0035587	FBgn0283741
FBgn0001250	FBgn0032140	FBgn0041096
FBgn0001114	FBgn0030412	FBgn0016672
FBgn0053056	FBgn0038595	FBgn0037720
FBgn0040551	FBgn0038115	FBgn0037742
FBgn0262794	FBgn0266569	FBgn0032010
FBgn0036742	FBgn0026721	FBgn0039101
FBgn0032140	FBgn0003218	FBgn0051216
FBgn0051769	FBgn0034761	FBgn0261363
FBgn0011828	FBgn0026320	FBgn0259481
FBgn0038088	FBgn0031150	FBgn0263077
FBgn0040850	FBgn0260008	FBgn0030040
FBgn0029766	FBgn0000256	FBgn0030748
FBgn0067311	FBgn0033520	FBgn0263400
FBgn0001226	FBgn0001091	FBgn0000253
FBgn0003137	FBgn0085354	FBgn0033141
FBgn0037167	FBgn0263080	FBgn0036742
FBgn0020251	FBgn0034720	FBgn0035879
FBgn0038679	FBgn0033188	FBgn0051729
FBgn0262563	FBgn0035964	FBgn0027657
FBgn0086347	FBgn0022709	FBgn0002838
FBgn0261261	FBgn0086347	FBgn0044871
FBgn0015589	FBgn0031213	FBgn0263220
FBgn0040007	FBgn0031888	FBgn0266758
FBgn0003218	FBgn0032010	FBgn0034691
FBgn0032405	FBgn0263930	FBgn0032857
FBgn0000256	FBgn0050460	FBgn0004456
FBgn0031560	FBgn0001105	FBgn0261565
FBgn0259715	FBgn0037956	FBgn0026602
FBgn0262972	FBgn0039844	FBgn0014141
FBgn0003447	FBgn0001230	FBgn0027509
FBgn0036262	FBgn0043070	FBgn0020304
FBgn0086355	FBgn0263258	FBgn0000042
FBgn0037387	FBgn0027580	FBgn0028394
FBgn0033188	FBgn0024238	FBgn0028931
FBgn0034720	FBgn0038149	FBgn0031090
FBgn0025628	FBgn0002563	FBgn0262030
FBgn0003525	FBgn0027844	FBgn0031457
FBgn0000299	FBgn0010238	FBgn0032036
FBgn0031037	FBgn0042135	FBgn0052528
FBgn0266521	FBgn0026562	FBgn0261260
FBgn0033268	FBgn0026602	FBgn0010388
FBgn0266000	FBgn0004647	FBgn0030780
FBgn0031150	FBgn0259896	FBgn0086347
FBgn0032010	FBgn0033949	FBgn0085390
FBgn0022709	FBgn0033268	FBgn0044047
FBgn0042135	FBgn0024150	FBgn0003388
FBgn0040309	FBgn0034880	FBgn0035715
FBgn0024238	FBgn0003890	FBgn0053494
FBgn0030412	FBgn0000636	FBgn0039747
FBgn0263080	FBgn0033521	FBgn0260006
FBgn0033635	FBgn0013763	FBgn0037541
FBgn0034724	FBgn0267727	FBgn0036053
FBgn0032727	FBgn0264087	FBgn0002945
FBgn0031213	FBgn0051313	FBgn0037843
FBgn0024150	FBgn0043841	FBgn0042135
FBgn0000278	FBgn0261244	FBgn0031307
FBgn0259740	FBgn0261628	FBgn0014133
FBgn0035587	FBgn0035743	FBgn0002645
FBgn0026320	FBgn0036752	FBgn0015040
FBgn0026602	FBgn0032311	FBgn0266253
FBgn0037956	FBgn0032857	FBgn0001941
FBgn0001105	FBgn0266000	FBgn0014029
FBgn0043070	FBgn0033032	FBgn0015575
FBgn0266569	FBgn0028396	FBgn0053462
FBgn0085354	FBgn0047178	FBgn0032670
FBgn0000071	FBgn0037468	FBgn0036433
FBgn0266405	FBgn0259977	FBgn0003890
FBgn0039844	FBgn0000277	FBgn0028546
FBgn0014011	FBgn0014011	FBgn0086708
FBgn0033139	FBgn0051374	FBgn0053111
FBgn0035964	FBgn0265191	FBgn0044826
FBgn0036752	FBgn0039051	FBgn0032499
FBgn0035743	FBgn0028514	FBgn0262808
FBgn0002609	FBgn0013675	FBgn0030114
FBgn0026721	FBgn0029147	FBgn0263930
FBgn0001091	FBgn0261560	FBgn0040104
FBgn0003890	FBgn0261989	FBgn0250868
FBgn0035708	FBgn0051337	FBgn0019968
FBgn0050460	FBgn0000318	FBgn0263324
FBgn0259977	FBgn0051729	FBgn0031150
FBgn0010238	FBgn0034200	FBgn0036805
FBgn0033521	FBgn0004629	FBgn0001105
FBgn0040099	FBgn0040099	FBgn0265413
FBgn0013469	FBgn0041184	FBgn0013765
FBgn0027580	FBgn0052066	FBgn0024321
FBgn0033032	FBgn0040104	FBgn0030933
FBgn0038115	FBgn0019661	FBgn0037142
FBgn0043841	FBgn0001257	FBgn0034443
FBgn0264087	FBgn0014869	FBgn0035236
FBgn0031888	FBgn0004397	FBgn0260945
FBgn0000636	FBgn0032638	FBgn0038037
FBgn0002535	FBgn0035708	FBgn0038744
FBgn0002733	FBgn0016075	FBgn0029002
FBgn0263930	FBgn0261565	FBgn0039398
FBgn0051729	FBgn0025885	FBgn0037447
FBgn0033949	FBgn0026189	FBgn0052407
FBgn0034761	FBgn0028984	FBgn0033063
FBgn0032857	FBgn0036433	FBgn0262582
FBgn0259896	FBgn0001226	FBgn0052655
FBgn0033448	FBgn0020304	FBgn0085488
FBgn0261244	FBgn0267001	FBgn0035009
FBgn0050098	FBgn0085195	FBgn0030716
FBgn0034880	FBgn0050148	FBgn0061198
FBgn0047178	FBgn0035076	FBgn0040206
FBgn0004397	FBgn0033875	FBgn0028514
FBgn0027844	FBgn0263346	FBgn0035852
FBgn0033520	FBgn0010397	FBgn0013771
FBgn0002531	FBgn0040837	FBgn0003206
FBgn0001257	FBgn0031296	FBgn0039088
FBgn0025454	FBgn0019968	FBgn0040723
FBgn0038595	FBgn0262945	FBgn0031821
FBgn0037225	FBgn0265177	FBgn0001092
FBgn0034200	FBgn0051075	FBgn0020510
FBgn0020304	FBgn0023129	FBgn0052783
FBgn0038149	FBgn0033438	FBgn0052786
FBgn0032311	FBgn0023170	FBgn0003557
FBgn0261565	FBgn0033134	FBgn0033980
FBgn0051374	FBgn0039045	FBgn0036697
FBgn0041183	FBgn0030796	FBgn0036518
FBgn0036587	FBgn0035542	FBgn0025628
FBgn0265191	FBgn0286071	FBgn0037386
FBgn0052066	FBgn0259683	FBgn0028424
FBgn0026189	FBgn0051361	FBgn0086532
FBgn0051313	FBgn0034408	FBgn0039844
FBgn0041184	FBgn0262146	FBgn0031463
FBgn0037163	FBgn0261549	FBgn0259923
FBgn0010397	FBgn0003053	FBgn0029167
FBgn0041713	FBgn0026374	FBgn0261649
FBgn0032726	FBgn0038206	FBgn0053276
FBgn0036433	FBgn0261800	FBgn0054054
FBgn0034219	FBgn0051999	FBgn0085261
FBgn0261560	FBgn0031327	FBgn0045073
FBgn0037468	FBgn0000579	FBgn0051279
FBgn0261989	FBgn0003074	FBgn0266673
FBgn0028984	FBgn0085360	FBgn0025641
FBgn0038206	FBgn0052412	FBgn0029710
FBgn0026562	FBgn0033502	FBgn0010051
FBgn0000318	FBgn0034219	FBgn0034417
FBgn0030326	FBgn0032731	FBgn0029976
FBgn0263995	FBgn0000276	FBgn0040813
FBgn0033438	FBgn0000071	FBgn0032624
FBgn0026160	FBgn0036778	FBgn0039801
FBgn0026374	FBgn0003884	FBgn0034946
FBgn0028514	FBgn0265991	FBgn0086694
FBgn0033134	FBgn0051324	FBgn0029155
FBgn0052412	FBgn0029093	FBgn0014865
FBgn0034408	FBgn0262808	FBgn0031250
FBgn0263346	FBgn0033153	FBgn0259178
FBgn0028396	FBgn0266417	FBgn0001104
FBgn0001233	FBgn0016059	FBgn0036752
FBgn0265991	FBgn0031453	FBgn0032318
FBgn0053926	FBgn0261258	FBgn0040904
FBgn0267001	FBgn0004449	FBgn0035445
FBgn0013763	FBgn0263077	FBgn0283712
FBgn0040837	FBgn0283712	FBgn0267635
FBgn0029147	FBgn0002535	FBgn0024277
FBgn0019661	FBgn0050098	FBgn0040395
FBgn0050148	FBgn0035497	FBgn0260049
FBgn0261628	FBgn0040299	FBgn0261988
FBgn0085195	FBgn0030737	FBgn0039759
FBgn0002563	FBgn0036485	FBgn0030796
FBgn0259683	FBgn0030340	FBgn0262563
FBgn0032638	FBgn0002609	FBgn0031374
FBgn0003884	FBgn0024321	FBgn0267001
FBgn0030796	FBgn0040609	FBgn0263346
FBgn0286071	FBgn0259243	FBgn0004636
FBgn0051337	FBgn0039113	FBgn0267487
FBgn0040104	FBgn0001218	FBgn0033188
FBgn0014869	FBgn0036821	FBgn0032192
FBgn0019968	FBgn0013272	FBgn0000017
FBgn0033502	FBgn0013672	FBgn0036931
FBgn0035542	FBgn0085282	FBgn0023407
FBgn0034335	FBgn0033518	FBgn0034408
FBgn0033875	FBgn0033448	FBgn0264344
FBgn0040299	FBgn0259715	FBgn0004133
FBgn0266376	FBgn0053926	FBgn0034315
FBgn0283712	FBgn0035608	FBgn0036309
FBgn0032946	FBgn0053346	FBgn0033134
FBgn0259228	FBgn0031261	FBgn0037753
FBgn0051361	FBgn0000278	FBgn0285896
FBgn0013675	FBgn0259228	FBgn0085442
FBgn0050115	FBgn0017581	FBgn0020385
FBgn0036007	FBgn0025631	FBgn0035993
FBgn0039045	FBgn0267408	FBgn0031600
FBgn0013770	FBgn0037063	FBgn0003205
FBgn0042104	FBgn0000044	FBgn0030847
FBgn0267727	FBgn0002526	FBgn0011828
FBgn0036778	FBgn0264478	FBgn0043070
FBgn0259243	FBgn0036449	FBgn0032588
FBgn0051324	FBgn0019660	FBgn0010406
FBgn0263077	FBgn0262965	FBgn0031791
FBgn0030344	FBgn0041183	FBgn0000152
FBgn0035497	FBgn0028542	FBgn0003687
FBgn0025885	FBgn0037913	FBgn0265174
FBgn0051174	FBgn0030847	FBgn0037315
FBgn0016075	FBgn0036341	FBgn0030575
FBgn0262945	FBgn0259711	FBgn0266186
FBgn0030847	FBgn0039827	FBgn0032821
FBgn0261549	FBgn0036364	FBgn0040236
FBgn0262965	FBgn0032946	FBgn0010424
FBgn0036821	FBgn0040383	FBgn0047178
FBgn0035076	FBgn0050069	FBgn0032249
FBgn0037750	FBgn0001967	FBgn0001257
FBgn0016059	FBgn0262985	FBgn0032699
FBgn0267795	FBgn0263220	FBgn0037074
FBgn0267252	FBgn0010894	FBgn0032587
FBgn0085360	FBgn0045823	FBgn0036806
FBgn0266417	FBgn0015399	FBgn0262716
FBgn0285992	FBgn0264490	FBgn0027082
FBgn0261258	FBgn0039075	FBgn0015286
FBgn0031457	FBgn0052667	FBgn0013953
FBgn0050489	FBgn0038877	FBgn0033502
FBgn0050069	FBgn0051195	FBgn0015795
FBgn0053329	FBgn0004242	FBgn0262112
FBgn0003074	FBgn0259481	FBgn0262815
FBgn0036485	FBgn0037750	FBgn0053558
FBgn0031327	FBgn0028331	FBgn0036496
FBgn0010226	FBgn0266084	FBgn0026630
FBgn0028940	FBgn0037447	FBgn0030638
FBgn0000261	FBgn0000261	FBgn0028671
FBgn0037447	FBgn0041710	FBgn0261570
FBgn0262808	FBgn0052672	FBgn0026084
FBgn0261800	FBgn0032726	FBgn0266417
FBgn0004629	FBgn0050115	FBgn0016078
FBgn0025631	FBgn0028936	FBgn0032400
FBgn0013272	FBgn0053329	FBgn0051955
FBgn0039113	FBgn0032036	FBgn0033799
FBgn0033446	FBgn0013279	FBgn0003660
FBgn0034999	FBgn0010246	FBgn0033051
FBgn0053503	FBgn0002773	FBgn0035401
FBgn0024321	FBgn0264489	FBgn0266724
FBgn0263258	FBgn0035203	FBgn0003514
FBgn0035608	FBgn0028940	FBgn0051769
FBgn0000043	FBgn0031457	FBgn0031637
FBgn0036341	FBgn0014388	FBgn0030090
FBgn0030340	FBgn0263415	FBgn0067311
FBgn0085282	FBgn0033469	FBgn0011232
FBgn0259923	FBgn0035539	FBgn0038098
FBgn0261563	FBgn0243516	FBgn0001961
FBgn0032191	FBgn0053558	FBgn0024236
FBgn0259481	FBgn0259923	FBgn0030670
FBgn0051075	FBgn0262620	FBgn0036341
FBgn0051999	FBgn0033446	FBgn0025631
FBgn0035539	FBgn0265760	FBgn0261258
FBgn0036663	FBgn0032405	FBgn0031298
FBgn0266084	FBgn0029608	FBgn0032079
FBgn0015765	FBgn0052594	FBgn0032955
FBgn0000044	FBgn0016926	FBgn0266376
FBgn0036449	FBgn0028480	FBgn0054029
FBgn0000565	FBgn0011232	FBgn0267978
FBgn0039678	FBgn0267252	FBgn0034312
FBgn0015399	FBgn0267795	FBgn0052425
FBgn0032731	FBgn0010225	FBgn0033928
FBgn0051195	FBgn0037541	FBgn0029932
FBgn0265760	FBgn0040752	FBgn0035603
FBgn0261393	FBgn0086708	FBgn0051141
FBgn0039075	FBgn0015765	FBgn0035952
FBgn0010894	FBgn0039155	FBgn0033268
FBgn0261988	FBgn0259111	FBgn0261628
FBgn0040609	FBgn0261458	FBgn0051523
FBgn0052594	FBgn0285992	FBgn0037714
FBgn0001142	FBgn0260005	FBgn0026319
FBgn0013279	FBgn0262477	FBgn0262160
FBgn0004242	FBgn0266376	FBgn0036877
FBgn0040383	FBgn0028424	FBgn0014127
FBgn0033366	FBgn0283741	FBgn0035964
FBgn0002526	FBgn0262964	FBgn0243516
FBgn0036364	FBgn0013765	FBgn0037539
FBgn0031016	FBgn0050090	FBgn0266720
FBgn0001218	FBgn0003206	FBgn0038299
FBgn0032036	FBgn0002719	FBgn0035623
FBgn0030310	FBgn0000043	FBgn0046687
FBgn0011232	FBgn0036663	FBgn0027558
FBgn0037720	FBgn0003093	FBgn0261458
FBgn0001149	FBgn0261563	FBgn0031853
FBgn0038877	FBgn0263212	FBgn0052672
FBgn0003093	FBgn0010406	FBgn0028916
FBgn0000579	FBgn0261988	FBgn0020372
FBgn0051092	FBgn0031470	FBgn0035812
FBgn0037063	FBgn0010039	FBgn0028490
FBgn0260005	FBgn0027598	FBgn0085188
FBgn0283741	FBgn0037433	FBgn0001224
FBgn0028427	FBgn0053111	FBgn0038973
FBgn0033469	FBgn0013720	FBgn0085212
FBgn0031261	FBgn0261385	FBgn0035528
FBgn0037541	FBgn0012037	FBgn0040319
FBgn0045823	FBgn0030189	FBgn0259711
FBgn0052982	FBgn0285896	FBgn0032205
FBgn0032499	FBgn0267348	FBgn0000299
FBgn0035203	FBgn0040395	FBgn0031343
FBgn0261545	FBgn0045852	FBgn0051999
FBgn0259711	FBgn0284408	FBgn0032633
FBgn0010246	FBgn0034398	FBgn0034638
FBgn0262101	FBgn0085307	FBgn0000083
FBgn0264489	FBgn0030065	FBgn0262127
FBgn0029093	FBgn0034583	FBgn0013343
FBgn0030670	FBgn0035023	FBgn0260746
FBgn0264478	FBgn0265059	FBgn0035146
FBgn0030484	FBgn0039226	FBgn0001258
FBgn0262985	FBgn0266724	FBgn0039488
FBgn0031470	FBgn0085453	FBgn0023081
FBgn0034417	FBgn0020372	FBgn0025865
FBgn0037906	FBgn0032499	FBgn0032014
FBgn0002578	FBgn0034417	FBgn0032694
FBgn0267408	FBgn0032639	FBgn0063494
FBgn0039155	FBgn0011722	FBgn0011742
FBgn0039266	FBgn0004167	FBgn0053461
FBgn0262477	FBgn0040102	FBgn0029157
FBgn0052195	FBgn0010041	FBgn0052311
FBgn0010039	FBgn0261545	FBgn0262114
FBgn0086708	FBgn0038720	FBgn0036929
FBgn0038890	FBgn0037819	FBgn0000043
FBgn0033153	FBgn0035879	FBgn0030286
FBgn0028936	FBgn0259178	FBgn0036886
FBgn0053111	FBgn0243514	FBgn0031693
FBgn0041710	FBgn0033204	FBgn0026787
FBgn0053346	FBgn0037720	FBgn0263585
FBgn0039714	FBgn0034963	FBgn0034838
FBgn0019660	FBgn0036419	FBgn0041789
FBgn0003206	FBgn0039927	FBgn0033960
FBgn0004449	FBgn0264693	FBgn0030890
FBgn0037819	FBgn0030241	FBgn0026148
FBgn0259178	FBgn0030484	FBgn0013763
FBgn0264494	FBgn0001296	FBgn0034566
FBgn0031296	FBgn0037166	FBgn0036740
FBgn0013720	FBgn0039467	FBgn0004574
FBgn0052512	FBgn0034405	FBgn0039969
FBgn0263212	FBgn0033880	FBgn0000636
FBgn0010395	FBgn0250868	FBgn0031253
FBgn0285896	FBgn0002534	FBgn0032533
FBgn0002773	FBgn0086370	FBgn0033032
FBgn0035879	FBgn0260795	FBgn0086370
FBgn0033649	FBgn0063667	FBgn0052066
FBgn0039226	FBgn0263118	FBgn0030412
FBgn0243516	FBgn0038098	FBgn0037454
FBgn0030085	FBgn0085271	FBgn0000071
FBgn0259682	FBgn0036549	FBgn0037906
FBgn0051826	FBgn0032191	FBgn0051363
FBgn0010406	FBgn0030048	FBgn0085233
FBgn0040395	FBgn0040259	FBgn0085307
FBgn0264693	FBgn0040319	FBgn0035515
FBgn0040259	FBgn0030326	FBgn0038912
FBgn0052667	FBgn0264494	FBgn0004908
FBgn0002533	FBgn0030993	FBgn0035955
FBgn0052368	FBgn0035173	FBgn0037857
FBgn0016926	FBgn0035499	FBgn0052264
FBgn0033204	FBgn0000064	FBgn0050460
FBgn0038720	FBgn0250848	FBgn0040670
FBgn0039467	FBgn0037007	FBgn0034010
FBgn0243514	FBgn0085320	FBgn0052579
FBgn0263415	FBgn0028430	FBgn0003447
FBgn0028480	FBgn0010395	FBgn0012037
FBgn0037166	FBgn0041604	FBgn0085443
FBgn0001235	FBgn0030976	FBgn0003137
FBgn0038098	FBgn0002565	FBgn0037008
FBgn0031090	FBgn0038074	FBgn0013718
FBgn0028331	FBgn0085390	FBgn0035400
FBgn0262964	FBgn0028427	FBgn0020620
FBgn0013765	FBgn0262815	FBgn0053542
FBgn0263118	FBgn0051781	FBgn0010246
FBgn0039827	FBgn0032889	FBgn0038763
FBgn0259221	FBgn0023525	FBgn0030629
FBgn0032156	FBgn0083972	FBgn0015513
FBgn0085307	FBgn0033649	FBgn0034723
FBgn0051781	FBgn0035146	FBgn0037094
FBgn0283680	FBgn0069923	FBgn0026090
FBgn0027108	FBgn0003514	FBgn0002948
FBgn0085390	FBgn0051826	FBgn0039178
FBgn0037913	FBgn0041094	FBgn0015000
FBgn0052672	FBgn0031090	FBgn0044511
FBgn0036419	FBgn0032006	FBgn0267727
FBgn0029131	FBgn0040793	FBgn0030799
FBgn0030048	FBgn0010226	FBgn0039070
FBgn0262160	FBgn0266758	FBgn0001114
FBgn0002576	FBgn0028990	FBgn0037751
FBgn0262716	FBgn0030670	FBgn0260005
FBgn0050090	FBgn0032129	FBgn0040259
FBgn0263220	FBgn0031012	FBgn0035772
FBgn0053170	FBgn0002533	FBgn0000414
FBgn0001967	FBgn0284257	FBgn0040238
FBgn0262582	FBgn0030332	FBgn0262687
FBgn0032297	FBgn0267665	FBgn0034999
FBgn0013672	FBgn0001235	FBgn0038708
FBgn0000723	FBgn0020416	FBgn0026562
FBgn0030737	FBgn0032156	FBgn0020251
FBgn0033880	FBgn0086254	FBgn0039023
FBgn0085453	FBgn0260746	FBgn0019643
FBgn0085446	FBgn0030778	FBgn0035896
FBgn0030065	FBgn0035679	FBgn0011570
FBgn0035499	FBgn0001149	FBgn0036318
FBgn0030976	FBgn0038243	FBgn0053523
FBgn0027621	FBgn0262733	FBgn0036298
FBgn0034583	FBgn0038744	FBgn0035142
FBgn0085421	FBgn0011817	FBgn0039461
FBgn0265059	FBgn0031805	FBgn0036696
FBgn0034894	FBgn0038419	FBgn0032005
FBgn0030839	FBgn0053977	FBgn0030752
FBgn0003435	FBgn0028394	FBgn0003093
FBgn0261547	FBgn0265048	FBgn0265178
FBgn0003231	FBgn0031268	FBgn0262477
FBgn0004635	FBgn0058469	FBgn0283666
FBgn0028424	FBgn0001961	FBgn0063491
FBgn0030189	FBgn0027594	FBgn0026570
FBgn0020372	FBgn0001142	FBgn0032156
FBgn0032517	FBgn0025620	FBgn0031134
FBgn0017581	FBgn0085443	FBgn0261563
FBgn0037433	FBgn0041180	FBgn0027611
FBgn0010041	FBgn0038349	FBgn0051158
FBgn0039927	FBgn0259736	FBgn0010909
FBgn0052850	FBgn0029092	FBgn0028664
FBgn0003514	FBgn0262582	FBgn0003884
FBgn0260746	FBgn0039908	FBgn0035309
FBgn0262733	FBgn0031914	FBgn0027080
FBgn0260795	FBgn0053978	FBgn0011225
FBgn0029092	FBgn0063497	FBgn0284249
FBgn0010905	FBgn0267487	FBgn0032025
FBgn0032899	FBgn0000635	FBgn0085354
FBgn0003660	FBgn0015795	FBgn0032197
FBgn0020416	FBgn0004908	FBgn0036237
FBgn0265177	FBgn0032139	FBgn0036522
FBgn0052816	FBgn0264343	FBgn0031631
FBgn0029608	FBgn0000273	FBgn0053665
FBgn0036549	FBgn0036381	FBgn0035975
FBgn0040752	FBgn0030520	FBgn0033677
FBgn0266719	FBgn0259224	FBgn0037235
FBgn0014388	FBgn0013676	FBgn0001149
FBgn0035173	FBgn0031971	FBgn0034451
FBgn0052528	FBgn0085421	FBgn0035999
FBgn0259736	FBgn0030183	FBgn0033092
FBgn0000308	FBgn0052626	FBgn0039711
FBgn0040206	FBgn0031693	FBgn0263390
FBgn0031453	FBgn0267505	FBgn0034057
FBgn0250868	FBgn0001624	FBgn0035203
FBgn0015795	FBgn0054003	FBgn0038773
FBgn0034963	FBgn0027836	FBgn0052533
FBgn0259111	FBgn0030839	FBgn0035776
FBgn0000422	FBgn0050456	FBgn0005666
FBgn0041094	FBgn0069056	FBgn0037387
FBgn0038037	FBgn0260768	FBgn0037465
FBgn0031012	FBgn0053556	FBgn0015393
FBgn0028563	FBgn0038037	FBgn0261461
FBgn0033518	FBgn0259221	FBgn0033265
FBgn0001941	FBgn0034894	FBgn0037647
FBgn0035146	FBgn0259246	FBgn0004687
FBgn0033065	FBgn0041605	FBgn0267252
FBgn0037623	FBgn0038842	FBgn0035034
FBgn0264490	FBgn0002566	FBgn0015279
FBgn0001296	FBgn0013995	FBgn0001075
FBgn0259676	FBgn0053462	FBgn0033366
FBgn0000273	FBgn0037623	FBgn0034271
FBgn0050456	FBgn0037680	FBgn0015240
FBgn0053558	FBgn0262656	FBgn0261547
FBgn0001624	FBgn0032025	FBgn0033376
FBgn0038744	FBgn0052195	FBgn0038149
FBgn0267487	FBgn0035237	FBgn0037166
FBgn0031268	FBgn0016081	FBgn0032634
FBgn0038243	FBgn0039056	FBgn0037536
FBgn0037680	FBgn0030114	FBgn0015791
FBgn0086370	FBgn0014009	FBgn0035589
FBgn0028394	FBgn0034753	FBgn0065032
FBgn0052037	FBgn0002531	FBgn0264494
FBgn0040102	FBgn0001168	FBgn0011695
FBgn0033872	FBgn0052512	FBgn0052194
FBgn0004837	FBgn0038890	FBgn0029825
FBgn0030241	FBgn0032681	FBgn0043001
FBgn0032639	FBgn0020653	FBgn0267057
FBgn0028430	FBgn0035517	FBgn0024361
FBgn0012037	FBgn0035868	FBgn0001250
FBgn0085320	FBgn0000084	FBgn0033474
FBgn0037007	FBgn0032899	FBgn0038685
FBgn0028542	FBgn0035770	FBgn0040260
FBgn0053556	FBgn0032264	FBgn0265185
FBgn0029095	FBgn0052311	FBgn0036485
FBgn0035237	FBgn0086906	FBgn0025457
FBgn0030114	FBgn0038658	FBgn0000308
FBgn0039908	FBgn0261547	FBgn0035497
FBgn0063497	FBgn0014133	FBgn0032698
FBgn0041721	FBgn0036198	FBgn0035557
FBgn0266724	FBgn0267488	FBgn0264087
FBgn0038074	FBgn0034501	FBgn0040285
FBgn0038419	FBgn0039637	FBgn0004569
FBgn0011286	FBgn0034723	FBgn0086355
FBgn0032129	FBgn0031913	FBgn0027780
FBgn0023170	FBgn0032192	FBgn0029737
FBgn0014009	FBgn0032821	FBgn0036896
FBgn0259224	FBgn0052865	FBgn0051687
FBgn0041096	FBgn0026090	FBgn0052112
FBgn0035400	FBgn0035400	FBgn0031776
FBgn0030778	FBgn0017558	FBgn0039538
FBgn0036144	FBgn0029737	FBgn0033712
FBgn0262815	FBgn0038420	FBgn0030160
FBgn0034398	FBgn0037536	FBgn0015229
FBgn0032810	FBgn0040206	FBgn0025335
FBgn0035236	FBgn0250837	FBgn0264389
FBgn0063649	FBgn0005655	FBgn0266446
FBgn0031547	FBgn0013678	FBgn0038720
FBgn0000084	FBgn0026369	FBgn0029971
FBgn0029737	FBgn0263773	FBgn0031450
FBgn0001301	FBgn0032955	FBgn0259937
FBgn0019952	FBgn0032421	FBgn0032200
FBgn0259246	FBgn0040236	FBgn0031268
FBgn0011817	FBgn0036144	FBgn0014009
FBgn0031805	FBgn0038516	FBgn0051949
FBgn0040319	FBgn0036007	FBgn0029789
FBgn0033127	FBgn0027611	FBgn0036212
FBgn0032264	FBgn0027865	FBgn0265525
FBgn0250816	FBgn0039613	FBgn0042106
FBgn0039685	FBgn0030876	FBgn0031971
FBgn0261385	FBgn0011286	FBgn0262017
FBgn0045852	FBgn0001301	FBgn0040765
FBgn0000116	FBgn0002733	FBgn0031973
FBgn0027611	FBgn0034139	FBgn0050147
FBgn0033928	FBgn0052528	FBgn0031597
FBgn0264343	FBgn0259209	FBgn0053107
FBgn0263706	FBgn0039098	FBgn0032354
FBgn0069056	FBgn0020445	FBgn0027844
FBgn0034647	FBgn0004574	FBgn0046247
FBgn0032889	FBgn0037065	FBgn0014018
FBgn0260768	FBgn0022787	FBgn0004380
FBgn0031971	FBgn0052264	FBgn0051415
FBgn0025692	FBgn0063649	FBgn0040784
FBgn0023525	FBgn0051092	FBgn0031143
FBgn0036641	FBgn0002562	FBgn0035194
FBgn0033782	FBgn0266719	FBgn0032486
FBgn0040297	FBgn0265487	FBgn0016031
FBgn0052264	FBgn0026160	FBgn0010812
FBgn0030993	FBgn0052194	FBgn0025558
FBgn0262353	FBgn0001941	FBgn0030499
FBgn0040236	FBgn0024987	FBgn0036311
FBgn0052311	FBgn0250906	FBgn0266405
FBgn0002565	FBgn0014427	FBgn0038569
FBgn0011722	FBgn0250816	FBgn0037554
FBgn0015924	FBgn0034642	FBgn0035209
FBgn0030467	FBgn0032147	FBgn0032378
FBgn0032025	FBgn0020376	FBgn0002868
FBgn0085271	FBgn0040297	FBgn0051820
FBgn0261458	FBgn0033928	FBgn0052243
FBgn0031914	FBgn0026315	FBgn0264894
FBgn0032681	FBgn0004387	FBgn0025885
FBgn0027865	FBgn0050463	FBgn0000077
FBgn0029924	FBgn0032297	FBgn0016075
FBgn0027594	FBgn0027929	FBgn0025640
FBgn0004654	FBgn0036805	FBgn0004167
FBgn0052194	FBgn0032699	FBgn0261244
FBgn0035023	FBgn0051678	FBgn0022027
FBgn0013678	FBgn0053144	FBgn0038330
FBgn0052865	FBgn0033257	FBgn0037939
FBgn0032821	FBgn0015396	FBgn0038981
FBgn0004908	FBgn0264090	FBgn0262354
FBgn0265487	FBgn0029506	FBgn0035585
FBgn0032699	FBgn0040723	FBgn0066084
FBgn0015571	FBgn0053087	FBgn0026404
FBgn0041182	FBgn0000723	FBgn0085452
FBgn0052638	FBgn0037465	FBgn0041582
FBgn0267348	FBgn0000308	FBgn0035262
FBgn0265140	FBgn0000578	FBgn0029514
FBgn0026090	FBgn0005278	FBgn0031610
FBgn0262699	FBgn0262160	FBgn0039098
FBgn0027598	FBgn0030575	FBgn0026315
FBgn0004167	FBgn0040503	FBgn0053460
FBgn0037465	FBgn0015924	FBgn0051807
FBgn0032955	FBgn0052428	FBgn0035005
FBgn0036198	FBgn0022702	FBgn0003483
FBgn0085443	FBgn0035623	FBgn0262902
FBgn0002534	FBgn0033224	FBgn0036449
FBgn0041180	FBgn0033907	FBgn0033212
FBgn0038420	FBgn0024227	FBgn0034626
FBgn0040723	FBgn0035295	FBgn0267668
FBgn0265276	FBgn0040398	FBgn0028552
FBgn0033257	FBgn0022359	FBgn0041188
FBgn0267665	FBgn0037228	FBgn0030614
FBgn0250848	FBgn0036587	FBgn0032246
FBgn0263659	FBgn0036318	FBgn0036689
FBgn0001961	FBgn0028490	FBgn0031886
FBgn0036805	FBgn0020762	FBgn0014388
FBgn0063494	FBgn0035678	FBgn0086372
FBgn0054003	FBgn0038294	FBgn0034970
FBgn0086254	FBgn0032350	FBgn0037846
FBgn0022787	FBgn0037336	FBgn0038319
FBgn0266758	FBgn0028550	FBgn0010620
FBgn0267488	FBgn0034985	FBgn0029660
FBgn0016122	FBgn0037850	FBgn0033402
FBgn0034501	FBgn0036090	FBgn0037884
FBgn0086906	FBgn0001248	FBgn0267348
FBgn0032139	FBgn0086450	FBgn0262733
FBgn0002645	FBgn0039419	FBgn0262989
FBgn0033777	FBgn0016797	FBgn0026721
FBgn0032421	FBgn0033782	FBgn0030018
FBgn0264090	FBgn0035968	FBgn0039026
FBgn0016078	FBgn0035142	FBgn0035380
FBgn0034723	FBgn0023526	FBgn0053978
FBgn0014427	FBgn0262699	FBgn0037671
FBgn0053087	FBgn0020414	FBgn0021760
FBgn0038658	FBgn0003124	FBgn0026479
FBgn0030183	FBgn0013997	FBgn0039639
FBgn0032235	FBgn0033250	FBgn0063493
FBgn0284257	FBgn0015575	FBgn0052643
FBgn0023407	FBgn0040382	FBgn0283469
FBgn0028990	FBgn0015929	FBgn0035767
FBgn0035623	FBgn0032253	FBgn0038275
FBgn0052369	FBgn0085446	FBgn0032429
FBgn0284408	FBgn0004858	FBgn0036942
FBgn0030520	FBgn0035444	FBgn0001230
FBgn0036318	FBgn0041789	FBgn0266418
FBgn0034405	FBgn0260477	FBgn0050495
FBgn0035142	FBgn0023479	FBgn0034420
FBgn0004858	FBgn0035461	FBgn0010235
FBgn0041605	FBgn0035209	FBgn0264078
FBgn0004574	FBgn0267849	FBgn0020277
FBgn0016081	FBgn0033127	FBgn0033916
FBgn0053144	FBgn0052407	FBgn0033240
FBgn0083972	FBgn0031547	FBgn0036191
FBgn0032253	FBgn0035083	FBgn0015790
FBgn0033638	FBgn0003997	FBgn0011674
FBgn0020445	FBgn0032810	FBgn0001202
FBgn0035517	FBgn0041182	FBgn0040679
FBgn0040285	FBgn0054054	FBgn0039160
FBgn0266377	FBgn0030994	FBgn0265102
FBgn0039056	FBgn0005771	FBgn0250785
FBgn0040827	FBgn0032235	FBgn0085203
FBgn0032006	FBgn0263706	FBgn0086704
FBgn0030876	FBgn0039969	FBgn0031633
FBgn0039419	FBgn0003076	FBgn0010894
FBgn0027836	FBgn0284249	FBgn0034270
FBgn0063493	FBgn0052207	FBgn0040871
FBgn0020249	FBgn0010905	FBgn0031091
FBgn0001168	FBgn0039593	FBgn0037922
FBgn0034642	FBgn0263392	FBgn0284255
FBgn0052407	FBgn0004378	FBgn0286071
FBgn0010051	FBgn0032420	FBgn0035481
FBgn0039613	FBgn0016126	FBgn0038369
FBgn0040398	FBgn0015221	FBgn0029693
FBgn0035770	FBgn0000490	FBgn0032218
FBgn0031374	FBgn0033996	FBgn0003062
FBgn0264695	FBgn0039250	FBgn0033104
FBgn0015577	FBgn0052850	FBgn0003969
FBgn0051778	FBgn0265140	FBgn0033226
FBgn0030286	FBgn0051038	FBgn0050421
FBgn0285955	FBgn0027578	FBgn0263197
FBgn0260745	FBgn0022774	FBgn0052843
FBgn0000635	FBgn0011703	FBgn0035789
FBgn0266720	FBgn0002645	FBgn0050088
FBgn0050414	FBgn0035763	FBgn0036335
FBgn0262620	FBgn0004362	FBgn0040271
FBgn0032147	FBgn0051778	FBgn0036364
FBgn0035868	FBgn0085261	FBgn0039690
FBgn0031913	FBgn0016032	FBgn0031536
FBgn0016126	FBgn0030085	FBgn0027793
FBgn0085442	FBgn0053170	FBgn0036396
FBgn0030052	FBgn0036397	FBgn0011770
FBgn0015396	FBgn0011747	FBgn0032376
FBgn0260660	FBgn0033121	FBgn0030400
FBgn0001186	FBgn0035811	FBgn0037276
FBgn0013997	FBgn0038407	FBgn0050443
FBgn0020376	FBgn0265185	FBgn0034145
FBgn0085484	FBgn0039685	FBgn0010441
FBgn0259209	FBgn0036501	FBgn0042213
FBgn0020510	FBgn0053181	FBgn0000318
FBgn0011704	FBgn0085450	FBgn0038183
FBgn0085736	FBgn0034390	FBgn0265760
FBgn0002566	FBgn0016078	FBgn0041588
FBgn0010225	FBgn0032218	FBgn0266670
FBgn0011674	FBgn0267641	FBgn0038313
FBgn0085261	FBgn0037240	FBgn0259243
FBgn0033996	FBgn0260660	FBgn0027948
FBgn0030958	FBgn0032252	FBgn0267795
FBgn0050015	FBgn0285955	FBgn0039855
FBgn0260945	FBgn0085478	FBgn0035049
FBgn0003076	FBgn0010051	FBgn0015776
FBgn0053462	FBgn0085442	FBgn0002121
FBgn0003475	FBgn0000116	FBgn0036005
FBgn0032005	FBgn0030286	FBgn0010340
FBgn0038826	FBgn0284442	FBgn0003517
FBgn0005655	FBgn0003423	FBgn0053506
FBgn0035444	FBgn0262567	FBgn0041713
FBgn0012034	FBgn0260986	FBgn0032026
FBgn0026369	FBgn0026593	FBgn0036987
FBgn0013718	FBgn0050015	FBgn0037442
FBgn0016797	FBgn0019952	FBgn0030976
FBgn0013995	FBgn0260745	FBgn0037815
FBgn0027578	FBgn0036643	FBgn0038466
FBgn0037146	FBgn0011656	FBgn0030362
FBgn0003205	FBgn0082585	FBgn0031458
FBgn0036480	FBgn0010228	FBgn0038603
FBgn0250837	FBgn0027108	FBgn0083983
FBgn0033978	FBgn0014417	FBgn0039113
FBgn0022702	FBgn0033065	FBgn0033548
FBgn0023479	FBgn0001186	FBgn0010877
FBgn0032218	FBgn0037853	FBgn0039836
FBgn0035968	FBgn0039914	FBgn0042112
FBgn0033250	FBgn0003495	FBgn0051007
FBgn0046687	FBgn0046687	FBgn0028509
FBgn0030994	FBgn0044047	FBgn0030234
FBgn0031738	FBgn0266446	FBgn0263088
FBgn0044047	FBgn0004507	FBgn0016693
FBgn0032420	FBgn0040285	FBgn0039347
FBgn0086675	FBgn0039099	FBgn0033550
FBgn0036643	FBgn0259682	FBgn0003475
FBgn0039099	FBgn0087007	FBgn0266889
FBgn0058469	FBgn0016694	FBgn0051144
FBgn0053461	FBgn0037533	FBgn0250826
FBgn0041604	FBgn0040064	FBgn0030008
FBgn0036381	FBgn0051145	FBgn0014906
FBgn0033756	FBgn0053459	FBgn0003525
FBgn0260991	FBgn0000414	FBgn0266860
FBgn0030332	FBgn0052816	FBgn0037364
FBgn0026593	FBgn0284435	FBgn0011672
FBgn0085478	FBgn0052638	FBgn0038100
FBgn0012051	FBgn0259233	FBgn0022224
FBgn0039098	FBgn0033777	FBgn0259715
FBgn0035763	FBgn0030141	FBgn0026059
FBgn0033844	FBgn0052368	FBgn0038361
FBgn0038516	FBgn0261625	FBgn0033903
FBgn0030575	FBgn0031957	FBgn0032290
FBgn0000578	FBgn0264491	FBgn0029870
FBgn0010651	FBgn0259173	FBgn0038286
FBgn0032694	FBgn0039776	FBgn0051361
FBgn0052267	FBgn0038320	FBgn0267350
FBgn0262567	FBgn0010768	FBgn0030955
FBgn0036816	FBgn0052296	FBgn0031331
FBgn0263106	FBgn0032668	FBgn0034400
FBgn0022774	FBgn0021944	FBgn0011824
FBgn0266420	FBgn0026713	FBgn0026196
FBgn0031717	FBgn0040070	FBgn0053100
FBgn0052626	FBgn0260991	FBgn0020545
FBgn0051431	FBgn0261556	FBgn0023511
FBgn0053181	FBgn0037552	FBgn0031395
FBgn0037536	FBgn0013469	FBgn0032421
FBgn0027506	FBgn0052396	FBgn0004859
FBgn0015568	FBgn0028543	FBgn0036299
FBgn0029711	FBgn0020415	FBgn0031069
FBgn0261570	FBgn0011704	FBgn0035090
FBgn0054054	FBgn0085423	FBgn0031560
FBgn0040068	FBgn0260945	FBgn0026620
FBgn0040503	FBgn0267033	FBgn0003231
FBgn0002562	FBgn0025382	FBgn0031413
FBgn0014029	FBgn0052687	FBgn0015801
FBgn0005278	FBgn0036518	FBgn0050285
FBgn0011260	FBgn0039877	FBgn0030778
FBgn0011592	FBgn0034249	FBgn0034915
FBgn0033402	FBgn0033987	FBgn0038195
FBgn0015575	FBgn0029524	FBgn0085478
FBgn0022359	FBgn0263400	FBgn0030556
FBgn0037850	FBgn0030052	FBgn0052110
FBgn0013676	FBgn0012034	FBgn0267033
FBgn0017558	FBgn0036299	FBgn0031909
FBgn0038349	FBgn0267220	FBgn0031640
FBgn0086450	FBgn0261647	FBgn0003275
FBgn0029506	FBgn0085484	FBgn0030276
FBgn0051219	FBgn0014029	FBgn0029755
FBgn0261108	FBgn0034736	FBgn0267733
FBgn0260743	FBgn0259735	FBgn0051457
FBgn0001234	FBgn0033554	FBgn0035425
FBgn0041789	FBgn0027508	FBgn0015789
FBgn0034985	FBgn0000114	FBgn0262109
FBgn0264542	FBgn0003071	FBgn0265652
FBgn0029659	FBgn0031974	FBgn0052594
FBgn0051678	FBgn0040827	FBgn0039304
FBgn0002543	FBgn0265276	FBgn0031312
FBgn0026196	FBgn0023407	FBgn0038583
FBgn0052296	FBgn0032938	FBgn0030482
FBgn0259734	FBgn0262142	FBgn0029121
FBgn0034142	FBgn0031897	FBgn0026320
FBgn0016032	FBgn0063494	FBgn0026738
FBgn0037044	FBgn0264542	FBgn0000150
FBgn0030510	FBgn0029996	FBgn0028480
FBgn0030122	FBgn0023000	FBgn0029736
FBgn0038804	FBgn0053542	FBgn0050091
FBgn0036053	FBgn0005660	FBgn0033090
FBgn0051549	FBgn0030056	FBgn0259749
FBgn0267641	FBgn0030237	FBgn0260462
FBgn0284249	FBgn0035896	FBgn0038058
FBgn0027508	FBgn0085736	FBgn0016126
FBgn0266446	FBgn0034399	FBgn0013269
FBgn0003310	FBgn0033476	FBgn0031126
FBgn0039637	FBgn0038250	FBgn0034802
FBgn0259233	FBgn0086655	FBgn0022023
FBgn0037240	FBgn0035452	FBgn0026369
FBgn0267849	FBgn0013771	FBgn0064766
FBgn0034266	FBgn0016917	FBgn0086254
FBgn0266186	FBgn0038826	FBgn0063667
FBgn0037602	FBgn0267635	FBgn0050389
FBgn0038842	FBgn0002924	FBgn0046225
FBgn0039941	FBgn0033159	FBgn0033686
FBgn0040942	FBgn0086356	FBgn0085279
FBgn0259937	FBgn0016122	FBgn0022893
FBgn0037612	FBgn0030510	FBgn0033717
FBgn0039776	FBgn0036480	FBgn0030982
FBgn0003997	FBgn0039487	FBgn0086378
FBgn0036824	FBgn0001234	FBgn0032264
FBgn0032252	FBgn0265274	FBgn0023169
FBgn0020414	FBgn0260743	FBgn0285910
FBgn0024920	FBgn0025697	FBgn0264693
FBgn0032668	FBgn0040942	FBgn0011224
FBgn0038020	FBgn0263088	FBgn0035085
FBgn0038652	FBgn0085466	FBgn0033010
FBgn0053542	FBgn0052267	FBgn0036666
FBgn0262656	FBgn0036770	FBgn0003285
FBgn0035085	FBgn0052091	FBgn0027563
FBgn0034399	FBgn0002873	FBgn0000273
FBgn0034691	FBgn0038804	FBgn0000084
FBgn0010768	FBgn0039466	FBgn0039059
FBgn0029823	FBgn0011260	FBgn0003401
FBgn0030529	FBgn0012051	FBgn0250830
FBgn0003328	FBgn0028552	FBgn0278608
FBgn0002973	FBgn0035715	FBgn0029088
FBgn0026315	FBgn0026196	FBgn0037956
FBgn0004381	FBgn0003175	FBgn0035323
FBgn0036806	FBgn0260400	FBgn0029819
FBgn0065098	FBgn0000152	FBgn0036643
FBgn0033121	FBgn0003435	FBgn0038475
FBgn0262002	FBgn0015803	FBgn0036566
FBgn0250906	FBgn0036053	FBgn0085423
FBgn0004387	FBgn0002564	FBgn0004957
FBgn0260986	FBgn0001233	FBgn0033926
FBgn0025620	FBgn0029892	FBgn0038046
FBgn0034736	FBgn0266186	FBgn0030519
FBgn0263400	FBgn0025682	FBgn0002526
FBgn0031910	FBgn0033906	FBgn0267488
FBgn0004507	FBgn0265512	FBgn0051151
FBgn0028490	FBgn0001086	FBgn0045842
FBgn0036299	FBgn0025621	FBgn0264694
FBgn0266632	FBgn0051051	FBgn0031947
FBgn0031737	FBgn0032727	FBgn0042177
FBgn0039877	FBgn0038437	FBgn0030864
FBgn0032350	FBgn0029710	FBgn0027929
FBgn0000490	FBgn0003475	FBgn0034304
FBgn0034139	FBgn0011259	FBgn0003480
FBgn0050088	FBgn0031374	FBgn0027597
FBgn0039250	FBgn0035917	FBgn0250732
FBgn0260477	FBgn0038325	FBgn0265186
FBgn0032785	FBgn0034335	FBgn0022288
FBgn0035452	FBgn0032848	FBgn0039156
FBgn0266307	FBgn0011674	FBgn0039175
FBgn0053459	FBgn0030310	FBgn0261477
FBgn0033554	FBgn0015714	FBgn0020909
FBgn0029524	FBgn0025815	FBgn0027335
FBgn0033159	FBgn0033978	FBgn0003371
FBgn0052428	FBgn0040232	FBgn0033948
FBgn0037443	FBgn0259734	FBgn0036671
FBgn0011692	FBgn0262035	FBgn0264950
FBgn0264326	FBgn0020249	FBgn0033020
FBgn0015714	FBgn0000565	FBgn0085224
FBgn0020633	FBgn0086558	FBgn0033816
FBgn0265185	FBgn0033205	FBgn0039356
FBgn0033987	FBgn0043364	FBgn0265042
FBgn0035715	FBgn0030799	FBgn0033644
FBgn0037999	FBgn0265726	FBgn0010043
FBgn0038809	FBgn0039026	FBgn0034532
FBgn0263593	FBgn0015000	FBgn0263841
FBgn0262035	FBgn0002543	FBgn0051961
FBgn0038100	FBgn0261108	FBgn0037680
FBgn0026713	FBgn0266307	FBgn0261797
FBgn0039466	FBgn0031284	FBgn0037619
FBgn0027601	FBgn0040336	FBgn0033844
FBgn0087007	FBgn0265194	FBgn0040973
FBgn0260226	FBgn0050088	FBgn0031910
FBgn0027929	FBgn0058006	FBgn0038419
FBgn0015000	FBgn0051174	FBgn0259483
FBgn0035896	FBgn0040071	FBgn0033195
FBgn0025697	FBgn0035321	FBgn0029672
FBgn0014133	FBgn0037999	FBgn0041180
FBgn0020653	FBgn0036824	FBgn0000279
FBgn0040382	FBgn0003660	FBgn0031688
FBgn0003124	FBgn0264822	FBgn0259734
FBgn0037228	FBgn0030300	FBgn0032750
FBgn0037065	FBgn0265652	FBgn0000278
FBgn0046114	FBgn0050389	FBgn0028970
FBgn0030799	FBgn0030328	FBgn0032224
FBgn0002873	FBgn0031973	FBgn0266708
FBgn0265048	FBgn0024920	FBgn0032704
FBgn0010228	FBgn0020257	FBgn0029853
FBgn0023549	FBgn0011692	FBgn0033907
FBgn0030793	FBgn0004859	FBgn0285926
FBgn0038909	FBgn0265042	FBgn0259683
FBgn0038320	FBgn0027949	FBgn0038455
FBgn0038299	FBgn0037817	FBgn0051111
FBgn0028546	FBgn0034312	FBgn0051029
FBgn0029710	FBgn0037723	FBgn0266667
FBgn0015372	FBgn0039566	FBgn0001291
FBgn0052706	FBgn0265052	FBgn0053113
FBgn0267505	FBgn0266420	FBgn0001222
FBgn0037853	FBgn0036857	FBgn0050090
FBgn0038428	FBgn0020633	FBgn0034117
FBgn0000152	FBgn0034885	FBgn0036145
FBgn0267635	FBgn0033945	FBgn0035977
FBgn0028552	FBgn0034098	FBgn0003392
FBgn0033945	FBgn0025814	FBgn0038953
FBgn0023526	FBgn0023514	FBgn0038420
FBgn0031693	FBgn0031460	FBgn0261545
FBgn0030237	FBgn0034142	FBgn0010238
FBgn0015221	FBgn0025390	FBgn0019661
FBgn0039026	FBgn0039612	FBgn0035542
FBgn0034098	FBgn0041150	FBgn0051715
FBgn0035295	FBgn0036316	FBgn0030340
FBgn0004611	FBgn0034670	FBgn0263659
FBgn0034249	FBgn0030521	FBgn0283500
FBgn0030328	FBgn0041629	FBgn0011592
FBgn0069923	FBgn0037146	FBgn0038964
FBgn0023514	FBgn0032815	FBgn0051092
FBgn0030748	FBgn0000017	FBgn0035237
FBgn0029148	FBgn0038652	FBgn0034200
FBgn0035083	FBgn0034694	FBgn0040345
FBgn0025815	FBgn0037989	FBgn0033868
FBgn0038197	FBgn0264695	FBgn0031261
FBgn0039612	FBgn0266860	FBgn0034139
FBgn0040212	FBgn0023214	FBgn0032292
FBgn0050463	FBgn0032456	FBgn0031453
FBgn0285910	FBgn0285910	FBgn0031547
FBgn0037552	FBgn0011837	FBgn0031914
FBgn0267033	FBgn0263855	FBgn0038809
FBgn0034091	FBgn0010415	FBgn0029689
FBgn0051051	FBgn0031566	FBgn0030061
FBgn0020762	FBgn0022893	FBgn0030365
FBgn0051637	FBgn0038660	FBgn0266124
FBgn0011747	FBgn0031738	FBgn0000711
FBgn0052251	FBgn0036801	FBgn0037848
FBgn0037753	FBgn0030529	FBgn0031675
FBgn0032698	FBgn0031049	FBgn0034105
FBgn0038660	FBgn0029823	FBgn0011771
FBgn0263088	FBgn0259937	FBgn0004369
FBgn0036518	FBgn0266711	FBgn0032172
FBgn0261632	FBgn0039178	FBgn0015522
FBgn0011703	FBgn0024320	FBgn0052438
FBgn0025814	FBgn0039561	FBgn0260768
FBgn0051145	FBgn0030122	FBgn0062440
FBgn0000414	FBgn0036298	FBgn0263258
FBgn0003071	FBgn0283427	FBgn0030958
FBgn0036501	FBgn0261574	FBgn0011722
FBgn0031957	FBgn0039427	FBgn0032946
FBgn0004876	FBgn0034091	FBgn0029084
FBgn0015929	FBgn0023549	FBgn0030659
FBgn0036397	FBgn0038803	FBgn0034577
FBgn0034909	FBgn0052017	FBgn0053459
FBgn0263855	FBgn0266421	FBgn0025866
FBgn0031143	FBgn0033924	FBgn0051710
FBgn0030747	FBgn0027601	FBgn0261393
FBgn0260400	FBgn0051217	FBgn0030242
FBgn0038325	FBgn0033373	FBgn0035608
FBgn0039593	FBgn0052280	FBgn0034583
FBgn0029996	FBgn0086691	FBgn0267815
FBgn0086558	FBgn0011592	FBgn0028523
FBgn0038250	FBgn0034618	FBgn0037207
FBgn0024320	FBgn0051219	FBgn0031403
FBgn0030500	FBgn0053460	FBgn0010215
FBgn0010314	FBgn0038735	FBgn0033348
FBgn0025621	FBgn0017414	FBgn0027598
FBgn0053978	FBgn0033653	FBgn0058354
FBgn0031460	FBgn0046763	FBgn0037293
FBgn0034897	FBgn0036891	FBgn0013720
FBgn0039561	FBgn0003463	FBgn0264542
FBgn0025641	FBgn0259483	FBgn0037560
FBgn0011656	FBgn0030234	FBgn0037261
FBgn0051815	FBgn0030747	FBgn0032530
FBgn0263395	FBgn0264326	FBgn0034049
FBgn0085423	FBgn0034691	FBgn0032208
FBgn0034885	FBgn0045800	FBgn0051145
FBgn0035091	FBgn0004198	FBgn0004436
FBgn0267336	FBgn0038100	FBgn0010288
FBgn0051217	FBgn0264815	FBgn0052521
FBgn0004865	FBgn0004381	FBgn0037829
FBgn0034390	FBgn0032196	FBgn0030030
FBgn0014417	FBgn0029820	FBgn0261989
FBgn0052521	FBgn0025726	FBgn0014869
FBgn0024491	FBgn0004876	FBgn0051759
FBgn0000017	FBgn0038020	FBgn0038039
FBgn0035209	FBgn0002567	FBgn0031998
FBgn0028671	FBgn0035767	FBgn0038855
FBgn0041150	FBgn0259722	FBgn0000412
FBgn0015803	FBgn0034365	FBgn0031356
FBgn0033907	FBgn0037810	FBgn0029526
FBgn0262167	FBgn0015576	FBgn0001308
FBgn0261574	FBgn0028671	FBgn0013263
FBgn0052396	FBgn0261570	FBgn0030969
FBgn0263316	FBgn0001122	FBgn0037915
FBgn0039969	FBgn0038197	FBgn0032213
FBgn0032938	FBgn0025558	FBgn0004648
FBgn0031484	FBgn0033988	FBgn0030328
FBgn0262142	FBgn0003062	FBgn0029986
FBgn0265042	FBgn0034915	FBgn0042094
FBgn0011236	FBgn0010350	FBgn0033912
FBgn0011259	FBgn0027558	FBgn0043457
FBgn0034997	FBgn0052251	FBgn0039902
FBgn0031068	FBgn0036816	FBgn0015270
FBgn0038129	FBgn0014018	FBgn0037138
FBgn0035204	FBgn0039680	FBgn0262515
FBgn0028543	FBgn0051216	FBgn0030673
FBgn0035976	FBgn0028507	FBgn0033934
FBgn0039505	FBgn0039928	FBgn0032780
FBgn0013771	FBgn0261938	FBgn0031420
FBgn0005771	FBgn0035312	FBgn0012034
FBgn0038551	FBgn0285925	FBgn0028684
FBgn0086757	FBgn0259876	FBgn0036921
FBgn0004652	FBgn0037906	FBgn0250837
FBgn0000996	FBgn0035204	FBgn0260655
FBgn0031973	FBgn0003231	FBgn0034753
FBgn0033476	FBgn0040260	FBgn0035151
FBgn0037810	FBgn0040153	FBgn0032444
FBgn0004378	FBgn0029521	FBgn0053977
FBgn0024912	FBgn0263617	FBgn0030341
FBgn0023000	FBgn0031220	FBgn0031985
FBgn0034523	FBgn0035976	FBgn0034027
FBgn0036770	FBgn0038909	FBgn0039561
FBgn0034312	FBgn0038545	FBgn0031378
FBgn0028550	FBgn0038476	FBgn0038853
FBgn0010909	FBgn0031896	FBgn0261836
FBgn0035917	FBgn0038428	FBgn0037240
FBgn0037749	FBgn0040323	FBgn0033551
FBgn0050085	FBgn0050085	FBgn0262142
FBgn0027558	FBgn0034897	FBgn0020238
FBgn0040070	FBgn0024491	FBgn0034964
FBgn0030141	FBgn0087021	FBgn0010173
FBgn0032208	FBgn0053461	FBgn0043012
FBgn0036302	FBgn0034870	FBgn0038872
FBgn0262619	FBgn0045842	FBgn0034243
FBgn0002564	FBgn0285917	FBgn0031868
FBgn0031990	FBgn0037705	FBgn0019972
FBgn0038966	FBgn0034126	FBgn0038065
FBgn0085317	FBgn0037753	FBgn0263510
FBgn0052207	FBgn0261632	FBgn0054015
FBgn0086356	FBgn0037883	FBgn0053704
FBgn0285913	FBgn0036685	FBgn0052109
FBgn0024236	FBgn0284221	FBgn0035213
FBgn0035461	FBgn0036353	FBgn0086676
FBgn0261556	FBgn0003328	FBgn0028983
FBgn0038437	FBgn0017551	FBgn0036118
FBgn0038294	FBgn0031484	FBgn0016984
FBgn0003502	FBgn0263395	FBgn0029529
FBgn0031535	FBgn0027783	FBgn0033891
FBgn0035811	FBgn0015371	FBgn0036306
FBgn0034670	FBgn0036806	FBgn0011289
FBgn0038545	FBgn0034614	FBgn0010314
FBgn0267220	FBgn0013718	FBgn0038428
FBgn0036857	FBgn0020513	FBgn0010434
FBgn0266409	FBgn0013953	FBgn0037022
FBgn0034049	FBgn0003016	FBgn0004647
FBgn0029826	FBgn0034997	FBgn0019828
FBgn0016930	FBgn0039738	FBgn0085736
FBgn0283666	FBgn0052521	FBgn0260720
FBgn0020257	FBgn0010355	FBgn0029750
FBgn0000719	FBgn0031886	FBgn0002466
FBgn0263110	FBgn0250754	FBgn0029502
FBgn0037149	FBgn0033890	FBgn0032256
FBgn0030521	FBgn0025641	FBgn0086346
FBgn0010043	FBgn0037315	FBgn0028526
FBgn0038407	FBgn0015391	FBgn0024754
FBgn0035346	FBgn0020510	FBgn0265598
FBgn0010415	FBgn0029819	FBgn0028848
FBgn0015391	FBgn0022069	FBgn0267849
FBgn0265274	FBgn0028563	FBgn0036121
FBgn0037843	FBgn0051158	FBgn0036125
FBgn0266860	FBgn0035776	FBgn0262601
FBgn0036188	FBgn0050344	FBgn0022359
FBgn0284442	FBgn0032698	FBgn0036686
FBgn0025111	FBgn0036896	FBgn0037702
FBgn0261625	FBgn0042094	FBgn0267390
FBgn0036165	FBgn0045073	FBgn0286070
FBgn0032196	FBgn0038608	FBgn0000277
FBgn0051064	FBgn0267376	FBgn0029147
FBgn0040153	FBgn0266053	FBgn0262166
FBgn0029820	FBgn0086694	FBgn0033392
FBgn0017414	FBgn0030501	FBgn0036258
FBgn0036801	FBgn0032078	FBgn0035173
FBgn0042094	FBgn0016076	FBgn0030915
FBgn0052091	FBgn0263260	FBgn0266377
FBgn0051216	FBgn0031143	FBgn0034186
FBgn0261041	FBgn0019686	FBgn0028663
FBgn0086694	FBgn0039714	FBgn0028331
FBgn0265726	FBgn0039187	FBgn0011704
FBgn0014469	FBgn0037025	FBgn0051278
FBgn0027563	FBgn0053465	FBgn0003977
FBgn0043364	FBgn0051064	FBgn0044510
FBgn0028983	FBgn0050046	FBgn0037065
FBgn0087021	FBgn0030349	FBgn0065110
FBgn0003016	FBgn0033471	FBgn0027503
FBgn0051038	FBgn0263593	FBgn0028938
FBgn0010355	FBgn0265068	FBgn0030675
FBgn0050389	FBgn0029666	FBgn0267726
FBgn0034179	FBgn0036695	FBgn0265003
FBgn0036316	FBgn0032856	FBgn0037561
FBgn0001086	FBgn0033551	FBgn0263598
FBgn0027509	FBgn0022361	FBgn0260748
FBgn0086532	FBgn0024980	FBgn0037468
FBgn0004859	FBgn0031910	FBgn0043783
FBgn0032705	FBgn0028546	FBgn0032935
FBgn0053145	FBgn0011770	FBgn0038332
FBgn0032815	FBgn0027610	FBgn0039466
FBgn0029819	FBgn0005198	FBgn0038056
FBgn0041171	FBgn0039209	FBgn0028554
FBgn0032906	FBgn0000405	FBgn0038465
FBgn0086372	FBgn0266667	FBgn0011787
FBgn0000114	FBgn0041585	FBgn0024329
FBgn0265174	FBgn0029095	FBgn0010078
FBgn0002989	FBgn0053138	FBgn0035210
FBgn0035789	FBgn0020269	FBgn0031496
FBgn0086704	FBgn0027552	FBgn0034091
FBgn0027610	FBgn0051637	FBgn0033880
FBgn0045842	FBgn0004369	FBgn0030452
FBgn0038446	FBgn0051777	FBgn0086446
FBgn0001122	FBgn0032208	FBgn0031708
FBgn0031498	FBgn0003545	FBgn0033153
FBgn0052280	FBgn0053136	FBgn0038808
FBgn0261649	FBgn0000479	FBgn0005655
FBgn0034126	FBgn0039800	FBgn0266421
FBgn0036101	FBgn0030687	FBgn0011708
FBgn0015793	FBgn0002542	FBgn0032004
FBgn0038118	FBgn0086704	FBgn0011589
FBgn0040237	FBgn0052062	FBgn0032018
FBgn0265194	FBgn0263110	FBgn0260632
FBgn0010382	FBgn0024250	FBgn0022787
FBgn0000479	FBgn0000147	FBgn0027052
FBgn0002924	FBgn0051005	FBgn0040964
FBgn0029521	FBgn0004133	FBgn0037121
FBgn0000405	FBgn0021764	FBgn0029824
FBgn0036843	FBgn0029148	FBgn0038516
FBgn0052062	FBgn0017577	FBgn0011747
FBgn0052017	FBgn0038129	FBgn0038396
FBgn0263617	FBgn0030745	FBgn0038619
FBgn0053465	FBgn0034647	FBgn0033205
FBgn0039101	FBgn0264975	FBgn0267828
FBgn0260499	FBgn0031535	FBgn0027552
FBgn0027949	FBgn0036101	FBgn0034488
FBgn0035589	FBgn0266064	FBgn0024320
FBgn0265652	FBgn0053145	FBgn0031832
FBgn0030745	FBgn0034523	FBgn0038582
FBgn0003268	FBgn0260499	FBgn0039025
FBgn0039025	FBgn0267698	FBgn0034307
FBgn0033309	FBgn0259113	FBgn0262945
FBgn0036697	FBgn0050414	FBgn0028430
FBgn0014018	FBgn0037469	FBgn0015797
FBgn0028397	FBgn0023535	FBgn0026582
FBgn0259979	FBgn0037044	FBgn0027504
FBgn0033483	FBgn0003371	FBgn0036180
FBgn0010300	FBgn0037028	FBgn0031497
FBgn0000394	FBgn0035789	FBgn0261800
FBgn0003463	FBgn0029822	FBgn0038674
FBgn0036298	FBgn0265174	FBgn0037933
FBgn0032856	FBgn0032445	FBgn0020633
FBgn0045800	FBgn0019890	FBgn0034392
FBgn0032935	FBgn0030607	FBgn0020300
FBgn0041188	FBgn0031988	FBgn0030052
FBgn0284435	FBgn0014906	FBgn0030834
FBgn0038735	FBgn0260985	FBgn0003607
FBgn0040234	FBgn0261238	FBgn0039155
FBgn0259173	FBgn0051961	FBgn0026393
FBgn0034970	FBgn0033544	FBgn0030141
FBgn0001248	FBgn0283680	FBgn0000092
FBgn0040071	FBgn0265045	FBgn0038053
FBgn0032123	FBgn0261859	FBgn0010768
FBgn0000158	FBgn0004652	FBgn0031608
FBgn0038476	FBgn0002778	FBgn0022160
FBgn0027280	FBgn0263289	FBgn0263746
FBgn0266441	FBgn0046114	FBgn0036999
FBgn0001085	FBgn0014469	FBgn0034849
FBgn0010350	FBgn0031148	FBgn0002733
FBgn0086655	FBgn0034033	FBgn0259227
FBgn0040064	FBgn0035285	FBgn0030878
FBgn0261808	FBgn0032076	FBgn0011836
FBgn0051635	FBgn0003310	FBgn0004865
FBgn0024361	FBgn0037843	FBgn0028542
FBgn0031220	FBgn0023508	FBgn0024365
FBgn0023507	FBgn0011236	FBgn0086558
FBgn0011606	FBgn0033756	FBgn0050069
FBgn0039209	FBgn0040091	FBgn0029659
FBgn0029666	FBgn0030724	FBgn0036266
FBgn0011705	FBgn0262081	FBgn0034097
FBgn0023214	FBgn0036697	FBgn0038576
FBgn0014135	FBgn0004055	FBgn0029801
FBgn0017577	FBgn0027581	FBgn0035469
FBgn0052687	FBgn0038053	FBgn0052068
FBgn0017551	FBgn0034958	FBgn0003008
FBgn0286198	FBgn0031247	FBgn0036257
FBgn0035496	FBgn0032785	FBgn0032899
FBgn0004108	FBgn0000546	FBgn0260940
FBgn0036772	FBgn0010382	FBgn0033953
FBgn0030349	FBgn0261703	FBgn0037146
FBgn0030955	FBgn0043362	FBgn0037923
FBgn0259735	FBgn0011754	FBgn0033757
FBgn0033551	FBgn0033402	FBgn0034356
FBgn0063449	FBgn0038058	FBgn0051224
FBgn0086691	FBgn0026630	FBgn0033949
FBgn0039665	FBgn0262588	FBgn0031244
FBgn0037548	FBgn0054015	FBgn0027569
FBgn0034753	FBgn0259175	FBgn0024234
FBgn0046763	FBgn0029088	FBgn0028292
FBgn0024227	FBgn0031752	FBgn0033571
FBgn0022338	FBgn0001104	FBgn0036035
FBgn0037339	FBgn0034221	FBgn0038585
FBgn0026179	FBgn0036165	FBgn0031245
FBgn0041585	FBgn0032906	FBgn0086656
FBgn0262902	FBgn0051344	FBgn0030943
FBgn0031070	FBgn0083124	FBgn0014380
FBgn0033458	FBgn0032149	FBgn0283659
FBgn0284221	FBgn0011705	FBgn0030851
FBgn0031948	FBgn0030628	FBgn0034231
FBgn0034958	FBgn0050089	FBgn0031997
FBgn0261238	FBgn0026378	FBgn0052817
FBgn0027552	FBgn0042104	FBgn0004638
FBgn0051522	FBgn0266916	FBgn0023507
FBgn0267668	FBgn0010314	FBgn0039856
FBgn0037082	FBgn0034718	FBgn0034494
FBgn0033653	FBgn0034248	FBgn0001234
FBgn0036551	FBgn0039101	FBgn0027783
FBgn0039187	FBgn0000721	FBgn0054039
FBgn0038683	FBgn0037341	FBgn0053252
FBgn0033166	FBgn0030958	FBgn0034483
FBgn0020647	FBgn0285991	FBgn0039467
FBgn0267698	FBgn0259978	FBgn0086442
FBgn0023535	FBgn0014931	FBgn0002566
FBgn0031284	FBgn0029937	FBgn0038504
FBgn0035888	FBgn0086532	FBgn0259224
FBgn0030056	FBgn0261862	FBgn0035076
FBgn0030300	FBgn0283499	FBgn0051195
FBgn0013953	FBgn0000394	FBgn0038327
FBgn0039111	FBgn0002466	FBgn0043455
FBgn0085466	FBgn0026192	FBgn0052591
FBgn0035425	FBgn0264501	FBgn0030529
FBgn0031824	FBgn0004390	FBgn0013983
FBgn0036353	FBgn0022338	FBgn0035333
FBgn0037206	FBgn0037647	FBgn0028897
FBgn0016076	FBgn0025463	FBgn0039226
FBgn0051961	FBgn0031878	FBgn0026872
FBgn0265045	FBgn0010313	FBgn0031437
FBgn0035767	FBgn0029959	FBgn0046763
FBgn0034718	FBgn0026207	FBgn0032638
FBgn0266667	FBgn0010651	FBgn0031059
FBgn0037734	FBgn0031190	FBgn0058191
FBgn0085450	FBgn0030400	FBgn0003189
FBgn0004379	FBgn0033458	FBgn0037637
FBgn0033913	FBgn0032105	FBgn0015777
FBgn0001104	FBgn0035953	FBgn0032194
FBgn0265068	FBgn0037560	FBgn0034528
FBgn0025335	FBgn0041630	FBgn0015527
FBgn0052649	FBgn0031401	FBgn0264489
FBgn0036059	FBgn0038299	FBgn0005632
FBgn0035321	FBgn0030482	FBgn0039735
FBgn0014863	FBgn0022160	FBgn0262656
FBgn0053136	FBgn0036354	FBgn0035251
FBgn0032587	FBgn0035346	FBgn0035243
FBgn0030346	FBgn0038388	FBgn0034724
FBgn0031566	FBgn0016930	FBgn0039075
FBgn0039590	FBgn0038446	FBgn0036207
FBgn0261862	FBgn0037142	FBgn0036336
FBgn0039800	FBgn0002989	FBgn0015568
FBgn0043362	FBgn0051635	FBgn0014006
FBgn0025777	FBgn0037612	FBgn0278598
FBgn0037560	FBgn0266409	FBgn0050085
FBgn0031030	FBgn0031990	FBgn0015949
FBgn0037973	FBgn0063498	FBgn0028380
FBgn0040323	FBgn0266411	FBgn0033438
FBgn0259175	FBgn0037746	FBgn0034962
FBgn0030090	FBgn0037000	FBgn0050447
FBgn0014931	FBgn0032050	FBgn0261602
FBgn0010441	FBgn0260003	FBgn0053062
FBgn0030336	FBgn0267668	FBgn0016081
FBgn0037354	FBgn0027330	FBgn0051849
FBgn0261859	FBgn0031998	FBgn0087011
FBgn0020415	FBgn0036551	FBgn0263831
FBgn0022160	FBgn0025683	FBgn0038446
FBgn0014861	FBgn0260006	FBgn0035878
FBgn0034392	FBgn0004107	FBgn0033755
FBgn0002567	FBgn0036732	FBgn0000709
FBgn0085465	FBgn0024361	FBgn0030680
FBgn0033051	FBgn0267390	FBgn0261862
FBgn0261703	FBgn0004913	FBgn0002989
FBgn0003495	FBgn0031054	FBgn0051223
FBgn0032456	FBgn0003502	FBgn0039756
FBgn0045073	FBgn0014022	FBgn0040233
FBgn0036927	FBgn0037878	FBgn0000052
FBgn0260006	FBgn0025777	FBgn0086675
FBgn0250785	FBgn0010300	FBgn0022153
FBgn0004369	FBgn0053113	FBgn0033272
FBgn0053138	FBgn0036837	FBgn0035335
FBgn0032415	FBgn0038034	FBgn0021764
FBgn0037315	FBgn0262127	FBgn0015296
FBgn0058160	FBgn0029114	FBgn0039869
FBgn0263289	FBgn0010342	FBgn0259710
FBgn0036815	FBgn0264273	FBgn0032401
FBgn0266311	FBgn0029659	FBgn0030434
FBgn0034194	FBgn0000547	FBgn0035644
FBgn0029672	FBgn0036030	FBgn0037491
FBgn0024980	FBgn0039111	FBgn0036096
FBgn0031637	FBgn0053523	FBgn0033725
FBgn0039668	FBgn0037489	FBgn0038325
FBgn0029114	FBgn0085465	FBgn0038597
FBgn0023508	FBgn0030608	FBgn0002921
FBgn0031516	FBgn0039590	FBgn0016034
FBgn0259483	FBgn0034392	FBgn0039731
FBgn0261584	FBgn0027500	FBgn0039051
FBgn0033266	FBgn0032415	FBgn0003274
FBgn0036850	FBgn0041188	FBgn0023095
FBgn0030608	FBgn0039941	FBgn0025574
FBgn0039774	FBgn0062413	FBgn0033313
FBgn0011742	FBgn0031952	FBgn0085229
FBgn0250850	FBgn0051955	FBgn0037044
FBgn0000147	FBgn0036929	FBgn0034658
FBgn0027945	FBgn0037548	FBgn0034708
FBgn0031190	FBgn0036927	FBgn0027553
FBgn0058006	FBgn0036843	FBgn0260635
FBgn0262737	FBgn0035589	FBgn0034422
FBgn0037885	FBgn0264751	FBgn0024432
FBgn0063498	FBgn0011661	FBgn0015295
FBgn0032924	FBgn0015776	FBgn0029524
FBgn0000721	FBgn0051522	FBgn0038320
FBgn0031998	FBgn0035888	FBgn0033069
FBgn0036620	FBgn0031782	FBgn0035763
FBgn0031598	FBgn0035247	FBgn0033429
FBgn0031752	FBgn0261584	FBgn0030996
FBgn0021764	FBgn0034970	FBgn0050392
FBgn0266053	FBgn0035085	FBgn0035420
FBgn0034618	FBgn0038683	FBgn0033899
FBgn0033906	FBgn0034626	FBgn0034736
FBgn0026630	FBgn0032705	FBgn0011638
FBgn0024806	FBgn0025335	FBgn0035867
FBgn0037705	FBgn0032907	FBgn0003278
FBgn0053516	FBgn0040066	FBgn0033127
FBgn0261802	FBgn0028970	FBgn0003545
FBgn0030234	FBgn0039538	FBgn0264953
FBgn0052163	FBgn0260486	FBgn0038545
FBgn0040271	FBgn0021979	FBgn0051431
FBgn0002542	FBgn0000719	FBgn0032252
FBgn0027529	FBgn0000996	FBgn0027087
FBgn0034946	FBgn0030660	FBgn0039531
FBgn0035312	FBgn0033309	FBgn0036117
FBgn0015371	FBgn0002638	FBgn0035541
FBgn0038034	FBgn0260959	FBgn0036825
FBgn0038053	FBgn0037130	FBgn0037920
FBgn0037647	FBgn0263106	FBgn0016917
FBgn0026192	FBgn0031663	FBgn0032779
FBgn0031285	FBgn0010316	FBgn0038471
FBgn0034033	FBgn0032935	FBgn0285937
FBgn0030400	FBgn0003041	FBgn0034614
FBgn0037878	FBgn0031882	FBgn0024992
FBgn0086895	FBgn0035189	FBgn0032405
FBgn0035776	FBgn0002643	FBgn0036213
FBgn0261647	FBgn0020386	FBgn0033375
FBgn0263392	FBgn0031069	FBgn0037943
FBgn0036732	FBgn0261444	FBgn0024804
FBgn0031882	FBgn0052243	FBgn0040080
FBgn0039205	FBgn0026179	FBgn0032214
FBgn0031148	FBgn0010340	FBgn0003502
FBgn0051648	FBgn0264982	FBgn0040634
FBgn0011762	FBgn0004197	FBgn0034084
FBgn0037723	FBgn0283666	FBgn0038577
FBgn0266452	FBgn0037518	FBgn0034433
FBgn0038974	FBgn0038973	FBgn0038989
FBgn0005660	FBgn0027529	FBgn0032702
FBgn0029959	FBgn0036522	FBgn0039449
FBgn0003557	FBgn0038974	FBgn0034398
FBgn0038659	FBgn0031598	FBgn0022344
FBgn0051005	FBgn0005612	FBgn0035526
FBgn0035719	FBgn0039733	FBgn0000244
FBgn0003520	FBgn0015222	FBgn0033507
FBgn0285991	FBgn0029118	FBgn0031724
FBgn0032848	FBgn0030352	FBgn0039634
FBgn0266918	FBgn0035959	FBgn0033705
FBgn0002643	FBgn0039025	FBgn0002638
FBgn0283427	FBgn0031285	FBgn0050496
FBgn0030391	FBgn0033665	FBgn0039927
FBgn0036030	FBgn0040271	FBgn0037897
FBgn0036820	FBgn0014861	FBgn0034744
FBgn0040260	FBgn0262579	FBgn0027091
FBgn0033665	FBgn0027620	FBgn0263353
FBgn0000547	FBgn0034194	FBgn0037652
FBgn0025558	FBgn0029824	FBgn0010621
FBgn0030501	FBgn0037882	FBgn0042185
FBgn0031886	FBgn0086895	FBgn0035703
FBgn0039538	FBgn0026570	FBgn0011656
FBgn0033890	FBgn0263490	FBgn0031169
FBgn0086358	FBgn0011824	FBgn0083961
FBgn0261787	FBgn0037376	FBgn0036918
FBgn0261444	FBgn0003205	FBgn0015351
FBgn0283499	FBgn0030748	FBgn0023479
FBgn0263490	FBgn0000158	FBgn0027615
FBgn0029088	FBgn0003889	FBgn0035624
FBgn0022069	FBgn0030041	FBgn0034221
FBgn0001291	FBgn0028425	FBgn0035001
FBgn0011754	FBgn0002932	FBgn0027081
FBgn0259722	FBgn0028499	FBgn0262481
FBgn0031851	FBgn0033244	FBgn0037899
FBgn0083124	FBgn0033356	FBgn0260477
FBgn0029873	FBgn0261004	FBgn0261283
FBgn0062440	FBgn0036815	FBgn0015614
FBgn0029892	FBgn0086757	FBgn0002069
FBgn0264501	FBgn0015270	FBgn0032029
FBgn0035603	FBgn0030336	FBgn0053192
FBgn0040373	FBgn0265974	FBgn0265630
FBgn0265988	FBgn0033990	FBgn0024889
FBgn0033388	FBgn0035496	FBgn0036043
FBgn0032670	FBgn0039505	FBgn0026373
FBgn0030628	FBgn0031498	FBgn0036333
FBgn0030724	FBgn0035603	FBgn0031449
FBgn0031815	FBgn0004635	FBgn0035533
FBgn0032078	FBgn0031824	FBgn0030757
FBgn0266418	FBgn0035975	FBgn0039052
FBgn0002466	FBgn0039328	FBgn0023508
FBgn0030345	FBgn0004861	FBgn0035693
FBgn0050089	FBgn0015801	FBgn0027610
FBgn0039137	FBgn0028526	FBgn0029705
FBgn0004197	FBgn0262617	FBgn0040906
FBgn0028526	FBgn0015600	FBgn0001624
FBgn0003062	FBgn0033087	FBgn0050156
FBgn0025390	FBgn0033555	FBgn0030121
FBgn0038388	FBgn0030067	FBgn0040475
FBgn0026570	FBgn0031449	FBgn0029891
FBgn0031589	FBgn0028983	FBgn0033340
FBgn0003423	FBgn0035425	FBgn0015245
FBgn0004861	FBgn0037659	FBgn0267365
FBgn0262588	FBgn0034083	FBgn0259175
FBgn0031878	FBgn0053516	FBgn0010220
FBgn0037551	FBgn0037551	FBgn0001276
FBgn0040238	FBgn0030327	FBgn0053180
FBgn0025682	FBgn0062440	FBgn0259795
FBgn0035829	FBgn0032390	FBgn0002579
FBgn0261436	FBgn0004584	FBgn0037913
FBgn0020269	FBgn0261041	FBgn0264785
FBgn0030660	FBgn0030793	FBgn0010228
FBgn0004133	FBgn0038809	FBgn0031604
FBgn0010313	FBgn0052181	FBgn0262738
FBgn0027581	FBgn0027348	FBgn0035137
FBgn0037376	FBgn0027280	FBgn0267824
FBgn0036929	FBgn0032849	FBgn0029521
FBgn0002778	FBgn0038964	FBgn0032956
FBgn0011824	FBgn0262788	FBgn0263237
FBgn0028978	FBgn0023509	FBgn0036545
FBgn0038256	FBgn0010173	FBgn0025684
FBgn0037341	FBgn0015793	FBgn0051815
FBgn0266064	FBgn0052369	FBgn0031484
FBgn0031988	FBgn0023507	FBgn0032856
FBgn0003041	FBgn0027356	FBgn0283503
FBgn0026404	FBgn0030809	FBgn0043841
FBgn0033845	FBgn0284220	FBgn0033584
FBgn0035877	FBgn0259742	FBgn0036198
FBgn0028425	FBgn0267824	FBgn0015828
FBgn0032390	FBgn0031637	FBgn0003308
FBgn0033356	FBgn0031816	FBgn0004381
FBgn0019643	FBgn0266632	FBgn0031030
FBgn0027783	FBgn0004611	FBgn0036958
FBgn0030968	FBgn0037222	FBgn0003346
FBgn0011297	FBgn0259745	FBgn0039637
FBgn0051472	FBgn0034354	FBgn0030218
FBgn0039680	FBgn0030087	FBgn0036569
FBgn0262524	FBgn0031589	FBgn0031893
FBgn0035977	FBgn0035996	FBgn0086686
FBgn0037000	FBgn0037231	FBgn0052650
FBgn0037883	FBgn0036980	FBgn0002780
FBgn0033087	FBgn0039559	FBgn0033244
FBgn0038608	FBgn0086372	FBgn0035204
FBgn0037744	FBgn0039137	FBgn0032259
FBgn0264273	FBgn0035488	FBgn0030478
FBgn0039328	FBgn0260456	FBgn0264325
FBgn0037028	FBgn0261445	FBgn0031822
FBgn0052380	FBgn0030090	FBgn0032346
FBgn0003401	FBgn0286198	FBgn0030347
FBgn0000546	FBgn0266111	FBgn0029507
FBgn0283473	FBgn0052756	FBgn0036915
FBgn0004584	FBgn0029969	FBgn0033656
FBgn0052202	FBgn0032901	FBgn0015360
FBgn0263442	FBgn0030653	FBgn0052368
FBgn0029937	FBgn0035210	FBgn0051098
FBgn0030545	FBgn0285913	FBgn0263278
FBgn0026479	FBgn0038609	FBgn0032195
FBgn0014930	FBgn0267534	FBgn0031428
FBgn0031981	FBgn0033638	FBgn0039274
FBgn0260486	FBgn0000244	FBgn0037251
FBgn0033212	FBgn0027499	FBgn0266710
FBgn0029504	FBgn0262619	FBgn0005427
FBgn0021979	FBgn0031059	FBgn0031384
FBgn0038973	FBgn0034179	FBgn0050463
FBgn0015776	FBgn0039381	FBgn0010398
FBgn0262103	FBgn0011606	FBgn0034368
FBgn0037746	FBgn0004379	FBgn0051064
FBgn0031703	FBgn0051710	FBgn0261584
FBgn0037963	FBgn0036286	FBgn0035356
FBgn0037222	FBgn0033607	FBgn0035149
FBgn0267390	FBgn0037973	FBgn0067864
FBgn0039109	FBgn0052649	FBgn0026238
FBgn0031091	FBgn0033483	FBgn0053087
FBgn0286075	FBgn0027563	FBgn0036162
FBgn0011672	FBgn0051523	FBgn0025674
FBgn0030479	FBgn0030054	FBgn0264751
FBgn0259876	FBgn0029881	FBgn0042712
FBgn0027620	FBgn0266410	FBgn0033539
FBgn0035975	FBgn0039668	FBgn0029504
FBgn0032901	FBgn0041147	FBgn0041781
FBgn0026378	FBgn0262167	FBgn0016685
FBgn0033905	FBgn0003520	FBgn0037356
FBgn0035488	FBgn0030467	FBgn0032420
FBgn0037076	FBgn0036820	FBgn0027492
FBgn0027356	FBgn0028397	FBgn0036571
FBgn0004914	FBgn0033741	FBgn0032464
FBgn0031059	FBgn0036333	FBgn0014024
FBgn0034614	FBgn0262524	FBgn0033121
FBgn0036837	FBgn0010379	FBgn0017578
FBgn0026323	FBgn0032670	FBgn0033460
FBgn0032105	FBgn0013759	FBgn0024314
FBgn0039566	FBgn0038099	FBgn0264492
FBgn0037518	FBgn0033075	FBgn0025814
FBgn0030206	FBgn0012036	FBgn0003345
FBgn0031054	FBgn0263659	FBgn0033471
FBgn0038532	FBgn0011297	FBgn0032620
FBgn0000250	FBgn0036301	FBgn0266570
FBgn0030087	FBgn0025739	FBgn0025109
FBgn0034354	FBgn0036309	FBgn0032105
FBgn0030894	FBgn0003559	FBgn0034879
FBgn0039178	FBgn0024698	FBgn0264815
FBgn0040232	FBgn0029873	FBgn0061476
FBgn0027330	FBgn0027945	FBgn0029942
FBgn0003545	FBgn0030500	FBgn0020272
FBgn0015222	FBgn0038659	FBgn0035402
FBgn0050392	FBgn0036018	FBgn0004915
FBgn0041582	FBgn0037443	FBgn0036291
FBgn0035959	FBgn0035877	FBgn0265962
FBgn0026576	FBgn0052202	FBgn0032052
FBgn0027339	FBgn0010441	FBgn0041191
FBgn0037130	FBgn0000140	FBgn0036334
FBgn0026079	FBgn0264517	FBgn0033356
FBgn0035285	FBgn0039109	FBgn0038424
FBgn0036359	FBgn0266918	FBgn0261802
FBgn0260003	FBgn0262614	FBgn0261671
FBgn0014340	FBgn0262740	FBgn0038235
FBgn0259978	FBgn0020389	FBgn0261597
FBgn0036058	FBgn0052022	FBgn0052100
FBgn0038601	FBgn0030081	FBgn0030717
FBgn0040091	FBgn0030121	FBgn0028743
FBgn0030327	FBgn0039730	FBgn0033540
FBgn0034626	FBgn0040237	FBgn0021814
FBgn0013759	FBgn0053653	FBgn0039302
FBgn0052756	FBgn0260444	FBgn0052816
FBgn0034870	FBgn0038966	FBgn0036136
FBgn0035978	FBgn0000097	FBgn0039698
FBgn0051710	FBgn0001085	FBgn0039687
FBgn0044871	FBgn0040324	FBgn0261811
FBgn0052243	FBgn0261802	FBgn0032595
FBgn0270926	FBgn0011762	FBgn0036991
FBgn0033052	FBgn0262737	FBgn0035880
FBgn0000140	FBgn0261722	FBgn0011705
FBgn0037882	FBgn0033212	FBgn0003943
FBgn0038803	FBgn0063449	FBgn0050089
FBgn0050046	FBgn0035981	FBgn0264343
FBgn0033607	FBgn0266418	FBgn0034743
FBgn0004380	FBgn0034299	FBgn0036580
FBgn0039132	FBgn0031601	FBgn0053668
FBgn0010379	FBgn0051915	FBgn0035438
FBgn0030694	FBgn0030694	FBgn0016978
FBgn0024698	FBgn0266696	FBgn0034959
FBgn0051344	FBgn0262866	FBgn0033174
FBgn0033205	FBgn0039886	FBgn0032455
FBgn0035247	FBgn0266452	FBgn0038909
FBgn0011474	FBgn0011672	FBgn0028990
FBgn0037659	FBgn0261787	FBgn0024558
FBgn0039559	FBgn0039665	FBgn0086712
FBgn0086365	FBgn0086444	FBgn0035523
FBgn0004107	FBgn0038118	FBgn0033285
FBgn0011202	FBgn0039751	FBgn0260012
FBgn0029825	FBgn0035438	FBgn0262886
FBgn0027499	FBgn0031659	FBgn0033890
FBgn0019686	FBgn0026620	FBgn0024222
FBgn0053052	FBgn0030391	FBgn0015268
FBgn0051390	FBgn0040384	FBgn0263395
FBgn0033544	FBgn0015372	FBgn0034727
FBgn0030091	FBgn0032587	FBgn0086472
FBgn0029944	FBgn0030091	FBgn0085284
FBgn0039733	FBgn0037556	FBgn0028894
FBgn0266916	FBgn0051648	FBgn0042085
FBgn0000018	FBgn0266549	FBgn0032253
FBgn0038465	FBgn0041582	FBgn0037710
FBgn0031536	FBgn0003048	FBgn0029858
FBgn0033734	FBgn0037354	FBgn0033100
FBgn0037469	FBgn0032397	FBgn0051374
FBgn0035141	FBgn0030545	FBgn0265508
FBgn0261445	FBgn0040212	FBgn0261444
FBgn0027500	FBgn0004598	FBgn0001122
FBgn0038853	FBgn0067783	FBgn0023514
FBgn0036811	FBgn0004108	FBgn0035540
FBgn0037025	FBgn0063491	FBgn0086447
FBgn0014906	FBgn0036537	FBgn0030268
FBgn0000499	FBgn0031813	FBgn0085317
FBgn0033382	FBgn0033052	FBgn0034128
FBgn0259824	FBgn0001308	FBgn0027601
FBgn0037142	FBgn0029826	FBgn0015829
FBgn0025549	FBgn0037206	FBgn0264291
FBgn0039882	FBgn0052380	FBgn0031361
FBgn0037489	FBgn0052982	FBgn0037756
FBgn0030482	FBgn0029504	FBgn0038735
FBgn0038432	FBgn0033051	FBgn0263864
FBgn0266464	FBgn0031717	FBgn0011817
FBgn0086359	FBgn0000615	FBgn0063649
FBgn0260985	FBgn0037081	FBgn0028396
FBgn0000244	FBgn0026323	FBgn0032822
FBgn0000286	FBgn0010470	FBgn0032625
FBgn0035287	FBgn0019662	FBgn0036565
FBgn0262169	FBgn0031315	FBgn0029896
FBgn0011837	FBgn0033431	FBgn0029915
FBgn0033924	FBgn0036059	FBgn0263047
FBgn0067783	FBgn0038968	FBgn0035854
FBgn0036354	FBgn0011774	FBgn0036302
FBgn0036688	FBgn0028700	FBgn0010380
FBgn0260749	FBgn0038746	FBgn0039306
FBgn0015801	FBgn0262902	FBgn0285950
FBgn0038746	FBgn0011205	FBgn0020278
FBgn0259745	FBgn0029944	FBgn0085484
FBgn0002921	FBgn0264324	FBgn0262647
FBgn0031952	FBgn0025634	FBgn0036587
FBgn0035805	FBgn0270926	FBgn0003117
FBgn0028700	FBgn0033081	FBgn0035374
FBgn0026207	FBgn0026479	FBgn0020379
FBgn0039204	FBgn0041171	FBgn0034914
FBgn0040290	FBgn0032293	FBgn0033458
FBgn0010342	FBgn0035978	FBgn0284251
FBgn0033431	FBgn0052537	FBgn0036484
FBgn0002723	FBgn0262169	FBgn0053556
FBgn0004913	FBgn0250785	FBgn0032170
FBgn0040324	FBgn0042710	FBgn0010408
FBgn0034569	FBgn0038640	FBgn0050334
FBgn0036309	FBgn0261286	FBgn0046294
FBgn0033170	FBgn0014930	FBgn0039303
FBgn0053653	FBgn0263039	FBgn0038903
FBgn0036126	FBgn0003891	FBgn0050349
FBgn0028292	FBgn0000228	FBgn0033232
FBgn0030607	FBgn0039266	FBgn0010774
FBgn0028970	FBgn0051453	FBgn0030406
FBgn0030067	FBgn0030092	FBgn0039489
FBgn0029911	FBgn0039017	FBgn0051038
FBgn0034915	FBgn0020647	FBgn0035107
FBgn0026620	FBgn0029911	FBgn0038972
FBgn0015278	FBgn0042111	FBgn0014395
FBgn0037248	FBgn0260749	FBgn0005777
FBgn0267733	FBgn0004380	FBgn0001296
FBgn0029006	FBgn0025549	FBgn0037265
FBgn0029789	FBgn0032919	FBgn0039589
FBgn0010340	FBgn0034215	FBgn0260861
FBgn0262788	FBgn0031070	FBgn0263755
FBgn0042111	FBgn0004875	FBgn0051740
FBgn0051098	FBgn0029825	FBgn0004106
FBgn0061197	FBgn0032956	FBgn0004171
FBgn0263864	FBgn0028292	FBgn0250824
FBgn0031286	FBgn0026143	FBgn0262866
FBgn0030054	FBgn0034232	FBgn0035704
FBgn0051211	FBgn0031948	FBgn0031534
FBgn0035233	FBgn0283473	FBgn0031549
FBgn0267792	FBgn0040238	FBgn0030679
FBgn0038106	FBgn0038881	FBgn0260008
FBgn0037592	FBgn0034814	FBgn0035868
FBgn0037391	FBgn0037076	FBgn0027594
FBgn0039182	FBgn0034371	FBgn0039259
FBgn0035981	FBgn0086365	FBgn0038656
FBgn0003891	FBgn0033453	FBgn0033738
FBgn0034494	FBgn0038038	FBgn0034033
FBgn0003048	FBgn0263237	FBgn0026192
FBgn0029881	FBgn0031011	FBgn0037518
FBgn0031191	FBgn0020493	FBgn0050467
FBgn0052537	FBgn0036126	FBgn0002567
FBgn0262617	FBgn0028476	FBgn0014877
FBgn0266369	FBgn0031950	FBgn0066114
FBgn0043001	FBgn0052425	FBgn0000115
FBgn0267824	FBgn0259676	FBgn0000618
FBgn0034726	FBgn0031981	FBgn0029867
FBgn0085377	FBgn0042083	FBgn0033523
FBgn0032330	FBgn0030206	FBgn0028399
FBgn0285917	FBgn0033548	FBgn0004606
FBgn0030352	FBgn0260965	FBgn0052392
FBgn0032620	FBgn0029800	FBgn0261385
FBgn0030403	FBgn0278598	FBgn0037358
FBgn0052708	FBgn0086657	FBgn0036857
FBgn0025463	FBgn0000317	FBgn0036688
FBgn0026431	FBgn0264785	FBgn0030025
FBgn0264324	FBgn0038853	FBgn0036448
FBgn0022361	FBgn0037885	FBgn0250816
FBgn0030943	FBgn0053969	FBgn0031782
FBgn0264982	FBgn0024912	FBgn0028484
FBgn0020238	FBgn0039741	FBgn0039099
FBgn0260779	FBgn0032620	FBgn0029823
FBgn0053523	FBgn0005624	FBgn0026722
FBgn0263199	FBgn0020545	FBgn0032518
FBgn0052425	FBgn0026059	FBgn0265140
FBgn0028476	FBgn0025381	FBgn0051855
FBgn0000404	FBgn0086674	FBgn0035082
FBgn0015286	FBgn0031673	FBgn0036772
FBgn0035842	FBgn0032702	FBgn0004509
FBgn0034371	FBgn0036688	FBgn0027580
FBgn0034083	FBgn0023083	FBgn0261049
FBgn0038363	FBgn0037478	FBgn0004396
FBgn0036576	FBgn0034494	FBgn0032796
FBgn0032770	FBgn0003268	FBgn0030300
FBgn0037634	FBgn0031428	FBgn0033814
FBgn0262579	FBgn0010762	FBgn0034058
FBgn0015296	FBgn0039737	FBgn0023515
FBgn0264617	FBgn0035719	FBgn0051337
FBgn0004875	FBgn0025469	FBgn0029979
FBgn0004106	FBgn0037578	FBgn0028538
FBgn0036844	FBgn0003963	FBgn0034390
FBgn0262740	FBgn0033523	FBgn0030694
FBgn0031119	FBgn0014092	FBgn0000173
FBgn0035099	FBgn0031099	FBgn0050187
FBgn0025726	FBgn0026079	FBgn0039013
FBgn0000097	FBgn0086909	FBgn0038461
FBgn0000667	FBgn0024273	FBgn0027568
FBgn0034879	FBgn0026404	FBgn0053465
FBgn0025739	FBgn0266369	FBgn0034035
FBgn0030246	FBgn0004370	FBgn0038110
FBgn0039381	FBgn0032863	FBgn0037707
FBgn0024194	FBgn0000499	FBgn0010300
FBgn0031782	FBgn0033382	FBgn0037551
FBgn0034361	FBgn0051211	FBgn0034961
FBgn0002774	FBgn0263200	FBgn0013469
FBgn0030013	FBgn0004106	FBgn0039993
FBgn0030351	FBgn0039240	FBgn0264776
FBgn0040334	FBgn0031030	FBgn0264490
FBgn0027279	FBgn0031191	FBgn0039261
FBgn0042710	FBgn0031119	FBgn0034523
FBgn0026059	FBgn0039929	FBgn0033468
FBgn0051638	FBgn0002723	FBgn0035196
FBgn0038881	FBgn0051044	FBgn0028507
FBgn0037276	FBgn0267200	FBgn0260859
FBgn0015031	FBgn0030403	FBgn0261702
FBgn0260008	FBgn0038363	FBgn0264437
FBgn0034435	FBgn0032474	FBgn0035587
FBgn0028956	FBgn0034569	FBgn0052380
FBgn0033304	FBgn0261986	FBgn0265726
FBgn0033770	FBgn0037022	FBgn0033266
FBgn0053868	FBgn0036483	FBgn0039740
FBgn0035432	FBgn0000109	FBgn0051633
FBgn0005666	FBgn0039854	FBgn0002626
FBgn0039124	FBgn0034796	FBgn0000405
FBgn0039050	FBgn0031609	FBgn0033208
FBgn0264310	FBgn0032864	FBgn0038658
FBgn0011666	FBgn0010786	FBgn0266284
FBgn0036728	FBgn0033683	FBgn0037342
FBgn0030466	FBgn0036754	FBgn0002622
FBgn0040793	FBgn0037094	FBgn0035590
FBgn0033686	FBgn0031536	FBgn0270924
FBgn0034476	FBgn0039212	FBgn0010926
FBgn0035727	FBgn0000286	FBgn0038842
FBgn0051451	FBgn0035153	FBgn0031951
FBgn0036043	FBgn0031313	FBgn0040918
FBgn0003701	FBgn0052177	FBgn0052831
FBgn0013679	FBgn0030452	FBgn0002924
FBgn0034290	FBgn0051694	FBgn0052847
FBgn0024289	FBgn0000330	FBgn0032147
FBgn0264750	FBgn0020270	FBgn0030065
FBgn0031871	FBgn0035337	FBgn0034432
FBgn0039914	FBgn0024806	FBgn0037045
FBgn0030808	FBgn0032222	FBgn0036927
FBgn0038277	FBgn0015799	FBgn0031535
FBgn0028896	FBgn0035640	FBgn0028506
FBgn0266711	FBgn0030554	FBgn0014020
FBgn0038013	FBgn0039132	FBgn0039459
FBgn0030941	FBgn0086912	FBgn0259482
FBgn0061198	FBgn0052708	FBgn0050491
FBgn0015025	FBgn0038432	FBgn0004867
FBgn0034245	FBgn0030943	FBgn0259896
FBgn0250815	FBgn0036844	FBgn0031478
FBgn0264449	FBgn0003557	FBgn0031287
FBgn0031434	FBgn0033734	FBgn0023167
FBgn0038912	FBgn0038593	FBgn0038432
FBgn0036896	FBgn0037617	FBgn0034068
FBgn0032642	FBgn0032170	FBgn0050354
FBgn0250907	FBgn0024364	FBgn0036085
FBgn0024987	FBgn0035854	FBgn0017581
FBgn0053977	FBgn0036893	FBgn0031772
FBgn0085334	FBgn0019932	FBgn0029911
FBgn0032509	FBgn0004510	FBgn0035532
FBgn0037336	FBgn0040334	FBgn0261549
FBgn0015790	FBgn0263442	FBgn0053926
FBgn0037958	FBgn0032202	FBgn0032521
FBgn0034631	FBgn0039626	FBgn0001197
FBgn0085468	FBgn0036147	FBgn0031309
FBgn0027872	FBgn0036514	FBgn0031620
FBgn0035849	FBgn0067102	FBgn0031766
FBgn0032192	FBgn0033468	FBgn0039505
FBgn0040364	FBgn0010113	FBgn0004465
FBgn0058002	FBgn0033387	FBgn0063670
FBgn0037533	FBgn0266674	FBgn0087013
FBgn0036063	FBgn0051849	FBgn0037719
FBgn0028663	FBgn0259170	FBgn0039402
FBgn0032076	FBgn0031055	FBgn0031611
FBgn0004921	FBgn0031478	FBgn0043362
FBgn0000146	FBgn0037621	FBgn0034354
FBgn0040751	FBgn0038532	FBgn0037687
FBgn0036484	FBgn0038903	FBgn0004698
FBgn0039994	FBgn0032197	FBgn0028467
FBgn0026787	FBgn0038577	FBgn0033221
FBgn0027596	FBgn0039044	FBgn0024806
FBgn0034145	FBgn0029778	FBgn0263212
FBgn0259227	FBgn0000667	FBgn0036975
FBgn0001276	FBgn0264617	FBgn0261674
FBgn0000046	FBgn0036288	FBgn0053635
FBgn0003159	FBgn0037074	FBgn0035285
FBgn0039004	FBgn0005683	FBgn0032454
FBgn0032751	FBgn0015031	FBgn0039929
FBgn0038889	FBgn0034245	FBgn0038652
FBgn0259728	FBgn0028956	FBgn0034416
FBgn0035953	FBgn0031737	FBgn0033770
FBgn0266670	FBgn0027843	FBgn0032409
FBgn0020386	FBgn0036728	FBgn0010741
FBgn0020278	FBgn0034435	FBgn0030291
FBgn0037046	FBgn0266405	FBgn0005278
FBgn0035211	FBgn0013770	FBgn0015509
FBgn0035160	FBgn0005666	FBgn0042180
FBgn0265512	FBgn0033686	FBgn0033806
FBgn0030675	FBgn0035432	FBgn0033000
FBgn0261461	FBgn0264310	FBgn0015571
FBgn0036279	FBgn0013679	FBgn0039665
FBgn0031643	FBgn0011666	FBgn0037236
FBgn0003371	FBgn0015568	FBgn0029860
FBgn0035020	FBgn0036641	FBgn0028707
FBgn0003386	FBgn0035727	FBgn0013764
FBgn0034356	FBgn0003701	FBgn0025366
FBgn0262127	FBgn0041713	FBgn0004050
FBgn0031359	FBgn0051451	FBgn0027521
FBgn0036423	FBgn0034476	FBgn0032700
FBgn0035106	FBgn0034290	FBgn0259113
FBgn0000543	FBgn0036043	FBgn0250822
FBgn0025382	FBgn0029924	FBgn0086908
FBgn0051158	FBgn0030955	FBgn0058002
FBgn0264822	FBgn0262101	FBgn0260935
FBgn0000567	FBgn0261393	FBgn0039188
FBgn0017482	FBgn0038277	FBgn0086895
FBgn0032249	FBgn0250907	FBgn0250844
FBgn0023540	FBgn0031871	FBgn0030720
FBgn0035401	FBgn0085468	FBgn0262081
FBgn0029648	FBgn0061198	FBgn0030004
FBgn0028683	FBgn0029131	FBgn0039129
FBgn0036695	FBgn0036063	FBgn0058263
FBgn0010435	FBgn0262716	FBgn0029840
FBgn0031896	FBgn0010043	FBgn0283625
FBgn0030892	FBgn0250815	FBgn0033724
FBgn0043783	FBgn0015025	FBgn0033672
FBgn0052831	FBgn0285948	FBgn0266668
FBgn0027505	FBgn0037781	FBgn0034968
FBgn0264751	FBgn0262952	FBgn0028499
FBgn0036685	FBgn0085334	FBgn0086779
FBgn0036145	FBgn0035132	FBgn0036911
FBgn0032290	FBgn0032509	FBgn0025682
FBgn0033802	FBgn0058002	FBgn0020261
FBgn0037742	FBgn0034631	FBgn0029959
FBgn0041630	FBgn0051365	FBgn0021825
FBgn0039336	FBgn0035236	FBgn0037137
FBgn0036311	FBgn0259728	FBgn0050403
FBgn0051365	FBgn0032290	FBgn0035444
FBgn0035824	FBgn0025454	FBgn0001235
FBgn0023023	FBgn0260226	FBgn0036816
FBgn0015520	FBgn0000146	FBgn0017572
FBgn0264491	FBgn0028663	FBgn0000326
FBgn0030305	FBgn0040373	FBgn0024985
FBgn0052181	FBgn0031068	FBgn0000046
FBgn0036897	FBgn0261380	FBgn0058045
FBgn0031968	FBgn0036484	FBgn0020376
FBgn0036335	FBgn0035849	FBgn0030846
FBgn0024956	FBgn0037958	FBgn0031440
FBgn0050010	FBgn0023540	FBgn0037973
FBgn0035993	FBgn0023517	FBgn0030746
FBgn0020385	FBgn0037734	FBgn0030994
FBgn0082585	FBgn0032751	FBgn0038344
FBgn0013698	FBgn0040907	FBgn0000257
FBgn0011566	FBgn0035761	FBgn0037656
FBgn0050108	FBgn0035106	FBgn0028468
FBgn0003317	FBgn0040751	FBgn0040068
FBgn0033988	FBgn0263048	FBgn0266019
FBgn0034248	FBgn0033802	FBgn0038342
FBgn0037781	FBgn0000567	FBgn0010039
FBgn0263397	FBgn0031688	FBgn0014930
FBgn0031168	FBgn0266670	FBgn0030711
[truncated: 5,717 more rows]
