# Supplementary material for: Constitutive activation of cellular immunity underlies the evolution of resistance to infection in Drosophila
Source: eLife. 2020 Dec 24;9:e59095. doi: 10.7554/eLife.59095 (PMC7785293; doi:10.7554/eLife.59095)
Supplement: Supplementary file 8. [file elife-59095-supp8.csv]

	P value	log(e) fold change in expression in cluster of interest compared to all other clusters	percent of cells expressing genes in cluster of interest	percent of cells expressing genes in all other clusters	Adjusted P value	cluster	gene
FBgn0029167	0	1.62539854	0.996	0.831	0	0	FBgn0029167
FBgn0001114	0	1.3185521	0.968	0.713	0	0	FBgn0001114
FBgn0000299	0	1.269816869	0.98	0.848	0	0	FBgn0000299
FBgn0026562	0	1.209767001	0.993	0.875	0	0	FBgn0026562
FBgn0011828	0	1.197825273	0.981	0.831	0	0	FBgn0011828
FBgn0033724	0	1.150477964	0.997	0.923	0	0	FBgn0033724
FBgn0003137	0	1.141779069	0.999	0.977	0	0	FBgn0003137
FBgn0259896	0	1.10070733	0.958	0.815	0	0	FBgn0259896
FBgn0261800	0	1.093458485	0.968	0.829	0	0	FBgn0261800
FBgn0026721	0	1.086549635	0.883	0.698	0	0	FBgn0026721
FBgn0002526	0	1.071007672	0.971	0.837	0	0	FBgn0002526
FBgn0031261	0	1.063030796	0.972	0.805	0	0	FBgn0031261
FBgn0029147	0	1.048923433	0.939	0.662	0	0	FBgn0029147
FBgn0040813	0	1.000124437	0.998	0.989	0	0	FBgn0040813
FBgn0267348	0	0.997853761	0.969	0.826	0	0	FBgn0267348
FBgn0034761	0	0.96457844	0.999	0.963	0	0	FBgn0034761
FBgn0033949	0	0.912869026	0.859	0.575	0	0	FBgn0033949
FBgn0261628	0	0.873268935	0.896	0.71	0	0	FBgn0261628
FBgn0040752	0	0.871452654	0.931	0.782	0	0	FBgn0040752
FBgn0029092	0	0.841746361	0.92	0.784	0	0	FBgn0029092
FBgn0045823	0	0.841088145	0.988	0.936	0	0	FBgn0045823
FBgn0035076	0	0.819392265	0.847	0.604	0	0	FBgn0035076
FBgn0004449	0	0.816341373	0.881	0.703	0	0	FBgn0004449
FBgn0260768	0	0.806581726	0.971	0.883	0	0	FBgn0260768
FBgn0003525	0	0.795303053	0.903	0.75	0	0	FBgn0003525
FBgn0085466	0	0.78611176	0.973	0.885	0	0	FBgn0085466
FBgn0030796	0	0.781351237	0.938	0.794	0	0	FBgn0030796
FBgn0020415	0	0.777858505	0.976	0.915	0	0	FBgn0020415
FBgn0016075	0	0.775731557	0.87	0.689	0	0	FBgn0016075
FBgn0039776	0	0.766134218	0.957	0.84	0	0	FBgn0039776
FBgn0013763	0	0.74884761	0.961	0.886	0	0	FBgn0013763
FBgn0029093	0	0.709431035	0.951	0.855	0	0	FBgn0029093
FBgn0051337	0	0.708955748	0.796	0.545	0	0	FBgn0051337
FBgn0028542	0	0.703234948	0.848	0.649	0	0	FBgn0028542
FBgn0037228	0	0.702313411	0.879	0.701	0	0	FBgn0037228
FBgn0011722	0	0.689889936	0.863	0.704	0	0	FBgn0011722
FBgn0014163	0	0.686871208	0.971	0.899	0	0	FBgn0014163
FBgn0243514	0	0.680175985	0.782	0.552	0	0	FBgn0243514
FBgn0033725	0	0.670773758	0.871	0.802	0	0	FBgn0033725
FBgn0004167	0	0.665053022	0.971	0.866	0	0	FBgn0004167
FBgn0003495	0	0.665006851	0.965	0.88	0	0	FBgn0003495
FBgn0266569	0	0.662033262	0.963	0.896	0	0	FBgn0266569
FBgn0031453	0	0.647917925	0.975	0.952	0	0	FBgn0031453
FBgn0034398	0	0.642844602	0.93	0.851	0	0	FBgn0034398
FBgn0000578	0	0.642497536	0.83	0.637	0	0	FBgn0000578
FBgn0265048	0	0.639750732	0.872	0.721	0	0	FBgn0265048
FBgn0030362	0	0.629871254	0.952	0.923	0	0	FBgn0030362
FBgn0032006	0	0.625994458	0.936	0.835	0	0	FBgn0032006
FBgn0051324	0	0.6251584	0.976	0.915	0	0	FBgn0051324
FBgn0014388	0	0.621195304	0.971	0.861	0	0	FBgn0014388
FBgn0025682	0	0.619719	0.934	0.837	0	0	FBgn0025682
FBgn0267727	0	0.611326988	0.923	0.818	0	0	FBgn0267727
FBgn0033777	0	0.60973298	0.904	0.766	0	0	FBgn0033777
FBgn0031913	0	0.604502604	0.946	0.805	0	0	FBgn0031913
FBgn0086254	0	0.59797103	0.937	0.843	0	0	FBgn0086254
FBgn0033153	0	0.594131316	0.816	0.661	0	0	FBgn0033153
FBgn0029506	0	0.589422746	0.982	0.916	0	0	FBgn0029506
FBgn0262881	0	0.573984114	0.792	0.623	0	0	FBgn0262881
FBgn0013770	0	0.569728658	0.994	0.955	0	0	FBgn0013770
FBgn0027598	0	0.560464198	0.821	0.624	0	0	FBgn0027598
FBgn0264343	0	0.557268148	0.946	0.839	0	0	FBgn0264343
FBgn0036144	0	0.551465091	0.876	0.742	0	0	FBgn0036144
FBgn0034753	0	0.540959057	0.976	0.958	0	0	FBgn0034753
FBgn0040102	0	0.538051087	0.757	0.521	0	0	FBgn0040102
FBgn0015221	0	0.531525736	0.975	0.94	0	0	FBgn0015221
FBgn0265140	0	0.525330679	0.976	0.9	0	0	FBgn0265140
FBgn0051092	0	0.521905187	0.89	0.806	0	0	FBgn0051092
FBgn0028331	0	0.519410349	0.76	0.67	0	0	FBgn0028331
FBgn0032889	0	0.51726584	0.945	0.865	0	0	FBgn0032889
FBgn0250848	0	0.505871899	0.891	0.839	0	0	FBgn0250848
FBgn0034139	0	0.501439181	0.875	0.794	0	0	FBgn0034139
FBgn0032638	0	0.500248201	0.897	0.745	0	0	FBgn0032638
FBgn0038826	0	0.492940846	0.873	0.75	0	0	FBgn0038826
FBgn0020416	0	0.489278013	0.817	0.692	0	0	FBgn0020416
FBgn0259735	0	0.485009286	0.86	0.775	0	0	FBgn0259735
FBgn0025885	0	0.484907892	0.931	0.863	0	0	FBgn0025885
FBgn0030521	0	0.474595816	0.916	0.866	0	0	FBgn0030521
FBgn0031914	0	0.473887119	0.711	0.502	0	0	FBgn0031914
FBgn0010228	0	0.473223079	0.944	0.905	0	0	FBgn0010228
FBgn0034985	0	0.472124362	0.788	0.698	0	0	FBgn0034985
FBgn0027594	0	0.462513076	0.782	0.642	0	0	FBgn0027594
FBgn0038250	0	0.445279974	0.826	0.731	0	0	FBgn0038250
FBgn0028990	0	0.440985767	0.772	0.702	0	0	FBgn0028990
FBgn0031327	0	0.440919585	0.957	0.877	0	0	FBgn0031327
FBgn0032405	0	0.439312822	0.761	0.621	0	0	FBgn0032405
FBgn0038476	0	0.438950342	0.752	0.672	0	0	FBgn0038476
FBgn0261385	0	0.431664237	0.784	0.694	0	0	FBgn0261385
FBgn0259111	0	0.426063174	0.736	0.564	0	0	FBgn0259111
FBgn0031805	0	0.408076013	0.836	0.711	0	0	FBgn0031805
FBgn0024227	0	0.407542934	0.878	0.76	0	0	FBgn0024227
FBgn0019952	0	0.407537574	0.827	0.665	0	0	FBgn0019952
FBgn0042106	0	0.407180703	0.974	0.892	0	0	FBgn0042106
FBgn0030241	0	0.393486499	0.854	0.772	0	0	FBgn0030241
FBgn0030234	0	0.38990974	0.935	0.842	0	0	FBgn0030234
FBgn0250837	0	0.387554898	0.918	0.868	0	0	FBgn0250837
FBgn0260991	0	0.377973713	0.845	0.725	0	0	FBgn0260991
FBgn0050463	0	0.375377966	0.721	0.601	0	0	FBgn0050463
FBgn0040091	0	0.370268561	0.842	0.728	0	0	FBgn0040091
FBgn0035209	0	0.362197019	0.883	0.762	0	0	FBgn0035209
FBgn0034736	0	0.356073189	0.778	0.575	0	0	FBgn0034736
FBgn0086356	0	0.352004191	0.835	0.738	0	0	FBgn0086356
FBgn0031738	0	0.333286258	0.853	0.696	0	0	FBgn0031738
FBgn0004378	0	0.3283611	0.755	0.651	0	0	FBgn0004378
FBgn0032078	0	0.326094944	0.853	0.785	0	0	FBgn0032078
FBgn0005655	0	0.322886339	0.905	0.828	0	0	FBgn0005655
FBgn0283461	0	0.320750662	0.934	0.877	0	0	FBgn0283461
FBgn0053558	0	0.314985251	0.897	0.752	0	0	FBgn0053558
FBgn0000719	0	0.29614693	0.797	0.733	0	0	FBgn0000719
FBgn0002924	0	0.293551684	0.787	0.676	0	0	FBgn0002924
FBgn0025814	0	0.280762083	0.807	0.709	0	0	FBgn0025814
FBgn0039250	0	0.280186077	0.778	0.667	0	0	FBgn0039250
FBgn0032946	0	0.27738169	0.851	0.773	0	0	FBgn0032946
FBgn0262142	0	0.270178354	0.893	0.768	0	0	FBgn0262142
FBgn0010300	0	0.263112791	0.811	0.742	0	0	FBgn0010300
FBgn0015396	0	0.263048995	0.76	0.645	0	0	FBgn0015396
FBgn0054003	0	0.261409815	0.811	0.74	0	0	FBgn0054003
FBgn0032105	0	0.260277367	0.814	0.688	0	0	FBgn0032105
FBgn0035767	0	0.256177329	0.861	0.729	0	0	FBgn0035767
FBgn0013678	0	-0.25351466	0.996	0.998	0	0	FBgn0013678
FBgn0027558	0	-0.254737577	0.599	0.719	0	0	FBgn0027558
FBgn0052296	0	-0.25567528	0.455	0.681	0	0	FBgn0052296
FBgn0013675	0	-0.259221805	0.997	0.999	0	0	FBgn0013675
FBgn0053192	0	-0.288218102	0.86	0.824	0	0	FBgn0053192
FBgn0030286	0	-0.30811135	0.708	0.762	0	0	FBgn0030286
FBgn0036485	0	-0.310975946	0.472	0.782	0	0	FBgn0036485
FBgn0261547	0	-0.327237376	0.455	0.671	0	0	FBgn0261547
FBgn0013672	0	-0.350293141	0.996	0.999	0	0	FBgn0013672
FBgn0037956	0	-0.381259917	0.538	0.696	0	0	FBgn0037956
FBgn0037723	0	-0.393089934	0.877	0.884	0	0	FBgn0037723
FBgn0000308	0	-0.397605427	0.991	0.994	0	0	FBgn0000308
FBgn0032010	0	-0.403836293	0.71	0.779	0	0	FBgn0032010
FBgn0000043	0	-0.410909646	1	1	0	0	FBgn0000043
FBgn0028430	0	-0.427728297	0.978	0.984	0	0	FBgn0028430
FBgn0001961	0	-0.444799479	0.946	0.957	0	0	FBgn0001961
FBgn0286071	0	-0.454189507	0.817	0.8	0	0	FBgn0286071
FBgn0267795	0	-0.457930756	0.981	0.986	0	0	FBgn0267795
FBgn0264815	0	-0.482162072	0.815	0.636	0	0	FBgn0264815
FBgn0010246	0	-0.493379412	0.963	0.969	0	0	FBgn0010246
FBgn0041188	0	-0.500390844	0.876	0.9	0	0	FBgn0041188
FBgn0261458	0	-0.512521968	0.963	0.973	0	0	FBgn0261458
FBgn0052066	0	-0.514389527	0.846	0.88	0	0	FBgn0052066
FBgn0003206	0	-0.527869258	0.616	0.752	0	0	FBgn0003206
FBgn0266719	0	-0.533108834	0.702	0.761	0	0	FBgn0266719
FBgn0259923	0	-0.533874801	0.706	0.799	0	0	FBgn0259923
FBgn0036298	0	-0.536401625	0.685	0.805	0	0	FBgn0036298
FBgn0036663	0	-0.539772222	0.719	0.783	0	0	FBgn0036663
FBgn0283712	0	-0.543096397	0.608	0.75	0	0	FBgn0283712
FBgn0033032	0	-0.546513857	0.852	0.859	0	0	FBgn0033032
FBgn0053461	0	-0.549612685	0.51	0.76	0	0	FBgn0053461
FBgn0038842	0	-0.557551897	0.974	0.984	0	0	FBgn0038842
FBgn0041183	0	-0.561087388	0.904	0.948	0	0	FBgn0041183
FBgn0037843	0	-0.561293974	0.87	0.895	0	0	FBgn0037843
FBgn0014133	0	-0.564222789	0.909	0.923	0	0	FBgn0014133
FBgn0035432	0	-0.573985058	0.841	0.889	0	0	FBgn0035432
FBgn0012051	0	-0.576657117	0.797	0.838	0	0	FBgn0012051
FBgn0001941	0	-0.582536716	0.906	0.932	0	0	FBgn0001941
FBgn0052264	0	-0.593099	0.654	0.801	0	0	FBgn0052264
FBgn0003660	0	-0.596374719	0.96	0.976	0	0	FBgn0003660
FBgn0026315	0	-0.596514278	0.628	0.798	0	0	FBgn0026315
FBgn0038149	0	-0.596987738	0.69	0.832	0	0	FBgn0038149
FBgn0050115	0	-0.598763305	0.547	0.717	0	0	FBgn0050115
FBgn0263346	0	-0.603278144	0.632	0.767	0	0	FBgn0263346
FBgn0041789	0	-0.604570497	0.873	0.916	0	0	FBgn0041789
FBgn0033469	0	-0.605462566	0.907	0.895	0	0	FBgn0033469
FBgn0015790	0	-0.607858856	0.913	0.958	0	0	FBgn0015790
FBgn0020249	0	-0.608382422	0.771	0.856	0	0	FBgn0020249
FBgn0003884	0	-0.614006583	1	1	0	0	FBgn0003884
FBgn0266758	0	-0.61885038	0.883	0.93	0	0	FBgn0266758
FBgn0004569	0	-0.621427035	0.831	0.809	0	0	FBgn0004569
FBgn0010395	0	-0.627823535	0.769	0.809	0	0	FBgn0010395
FBgn0033756	0	-0.628192565	0.827	0.9	0	0	FBgn0033756
FBgn0053494	0	-0.629578894	0.936	0.955	0	0	FBgn0053494
FBgn0033926	0	-0.629591262	0.999	0.999	0	0	FBgn0033926
FBgn0259977	0	-0.636180832	0.679	0.768	0	0	FBgn0259977
FBgn0259221	0	-0.637661189	0.646	0.785	0	0	FBgn0259221
FBgn0000083	0	-0.645387394	0.991	0.994	0	0	FBgn0000083
FBgn0035603	0	-0.650049069	0.912	0.938	0	0	FBgn0035603
FBgn0029131	0	-0.65074997	0.8	0.874	0	0	FBgn0029131
FBgn0034417	0	-0.651654611	0.868	0.883	0	0	FBgn0034417
FBgn0262160	0	-0.653612093	0.768	0.833	0	0	FBgn0262160
FBgn0015765	0	-0.667426071	0.711	0.816	0	0	FBgn0015765
FBgn0003093	0	-0.671949539	0.639	0.785	0	0	FBgn0003093
FBgn0030529	0	-0.675350059	0.908	0.96	0	0	FBgn0030529
FBgn0029095	0	-0.68450751	0.88	0.92	0	0	FBgn0029095
FBgn0001291	0	-0.685200336	0.768	0.899	0	0	FBgn0001291
FBgn0261261	0	-0.688565321	0.806	0.806	0	0	FBgn0261261
FBgn0000042	0	-0.694491432	1	1	0	0	FBgn0000042
FBgn0261988	0	-0.700614538	0.757	0.842	0	0	FBgn0261988
FBgn0038890	0	-0.704850427	0.788	0.881	0	0	FBgn0038890
FBgn0052412	0	-0.709504374	0.783	0.819	0	0	FBgn0052412
FBgn0000318	0	-0.72356151	0.951	0.96	0	0	FBgn0000318
FBgn0040551	0	-0.729341408	0.739	0.806	0	0	FBgn0040551
FBgn0262699	0	-0.736994552	0.808	0.838	0	0	FBgn0262699
FBgn0263118	0	-0.737240624	0.813	0.845	0	0	FBgn0263118
FBgn0086355	0	-0.738000591	0.845	0.858	0	0	FBgn0086355
FBgn0263077	0	-0.739057897	0.607	0.774	0	0	FBgn0263077
FBgn0001105	0	-0.739630976	0.979	0.984	0	0	FBgn0001105
FBgn0259481	0	-0.748771945	0.654	0.847	0	0	FBgn0259481
FBgn0004397	0	-0.779708394	0.798	0.839	0	0	FBgn0004397
FBgn0024150	0	-0.780501942	0.77	0.815	0	0	FBgn0024150
FBgn0028427	0	-0.782305146	0.847	0.888	0	0	FBgn0028427
FBgn0037720	0	-0.791855798	0.67	0.83	0	0	FBgn0037720
FBgn0028916	0	-0.795437233	0.853	0.861	0	0	FBgn0028916
FBgn0028480	0	-0.826514816	0.774	0.875	0	0	FBgn0028480
FBgn0000256	0	-0.829285756	0.767	0.826	0	0	FBgn0000256
FBgn0086347	0	-0.833088786	0.952	0.952	0	0	FBgn0086347
FBgn0053056	0	-0.834990842	0.698	0.796	0	0	FBgn0053056
FBgn0042135	0	-0.84827643	0.761	0.842	0	0	FBgn0042135
FBgn0036752	0	-0.857938488	0.794	0.881	0	0	FBgn0036752
FBgn0024238	0	-0.861955424	0.915	0.923	0	0	FBgn0024238
FBgn0259228	0	-0.870419429	0.839	0.89	0	0	FBgn0259228
FBgn0001149	0	-0.876965347	0.977	0.987	0	0	FBgn0001149
FBgn0031547	0	-0.878304612	0.896	0.934	0	0	FBgn0031547
FBgn0041710	0	-0.879744656	0.819	0.898	0	0	FBgn0041710
FBgn0026602	0	-0.881466578	0.797	0.839	0	0	FBgn0026602
FBgn0031791	0	-0.886528215	0.881	0.875	0	0	FBgn0031791
FBgn0014011	0	-0.894104769	0.906	0.945	0	0	FBgn0014011
FBgn0027066	0	-0.909172516	0.939	0.962	0	0	FBgn0027066
FBgn0032400	0	-0.912299565	0.777	0.861	0	0	FBgn0032400
FBgn0001258	0	-0.925440151	0.843	0.889	0	0	FBgn0001258
FBgn0000253	0	-0.929032314	1	1	0	0	FBgn0000253
FBgn0010387	0	-0.930573579	0.8	0.8	0	0	FBgn0010387
FBgn0004636	0	-0.94712054	0.977	0.986	0	0	FBgn0004636
FBgn0039844	0	-0.963666568	0.842	0.866	0	0	FBgn0039844
FBgn0003890	0	-0.988671292	0.864	0.908	0	0	FBgn0003890
FBgn0261561	0	-0.995501113	0.814	0.834	0	0	FBgn0261561
FBgn0035708	0	-1.015036788	0.783	0.838	0	0	FBgn0035708
FBgn0010397	0	-1.043598853	0.84	0.93	0	0	FBgn0010397
FBgn0004657	0	-1.057837445	0.961	0.974	0	0	FBgn0004657
FBgn0029903	0	-1.062929038	0.836	0.897	0	0	FBgn0029903
FBgn0036742	0	-1.063992209	0.846	0.88	0	0	FBgn0036742
FBgn0038206	0	-1.086450905	0.824	0.888	0	0	FBgn0038206
FBgn0260442	0	-1.091816533	0.938	0.964	0	0	FBgn0260442
FBgn0041087	0	-1.13124972	0.925	0.944	0	0	FBgn0041087
FBgn0051729	0	-1.141124118	0.877	0.9	0	0	FBgn0051729
FBgn0001092	0	-1.15778078	0.933	0.957	0	0	FBgn0001092
FBgn0263380	0	-1.172121653	0.873	0.881	0	0	FBgn0263380
FBgn0029932	0	-1.198280905	0.891	0.892	0	0	FBgn0029932
FBgn0032886	0	-1.205970773	0.83	0.907	0	0	FBgn0032886
FBgn0033504	0	-1.222302002	0.814	0.881	0	0	FBgn0033504
FBgn0003218	0	-1.238634156	0.845	0.9	0	0	FBgn0003218
FBgn0264895	0	-1.274320982	0.94	0.967	0	0	FBgn0264895
FBgn0265375	0	-1.278944773	0.808	0.912	0	0	FBgn0265375
FBgn0034219	0	-1.279078992	0.9	0.946	0	0	FBgn0034219
FBgn0003886	0	-1.279808249	0.999	0.999	0	0	FBgn0003886
FBgn0053225	0	-1.323012508	0.944	0.956	0	0	FBgn0053225
FBgn0035498	0	-1.327691399	0.936	0.956	0	0	FBgn0035498
FBgn0014141	0	-1.33182136	0.949	0.982	0	0	FBgn0014141
FBgn0266253	0	-1.338070211	0.966	0.952	0	0	FBgn0266253
FBgn0037386	0	-1.349356377	0.979	0.986	0	0	FBgn0037386
FBgn0050035	0	-1.355905513	0.837	0.873	0	0	FBgn0050035
FBgn0003748	0	-1.374107684	0.861	0.899	0	0	FBgn0003748
FBgn0033446	0	-1.379482692	0.915	0.965	0	0	FBgn0033446
FBgn0002868	0	-1.452282404	0.994	0.995	0	0	FBgn0002868
FBgn0033448	0	-1.459662541	0.882	0.934	0	0	FBgn0033448
FBgn0034005	0	-1.520343311	0.845	0.891	0	0	FBgn0034005
FBgn0015872	0	-1.565622954	0.848	0.876	0	0	FBgn0015872
FBgn0038682	0	-1.643697088	0.895	0.911	0	0	FBgn0038682
FBgn0037477	0	-1.664015277	0.873	0.93	0	0	FBgn0037477
FBgn0013733	0	-1.762763414	0.865	0.954	0	0	FBgn0013733
FBgn0032422	0	-1.766567483	0.974	0.983	0	0	FBgn0032422
FBgn0261363	0	-1.867735298	0.95	0.964	0	0	FBgn0261363
FBgn0030040	0	-1.895041916	0.973	0.991	0	0	FBgn0030040
FBgn0030396	0	-1.982764354	0.886	0.925	0	0	FBgn0030396
FBgn0003888	0	-1.992655362	0.987	0.992	0	0	FBgn0003888
FBgn0020238	7.83E-308	-0.27469623	0.996	0.996	1.57E-304	0	FBgn0020238
FBgn0034501	1.75E-305	-0.351527573	0.581	0.742	3.50E-302	0	FBgn0034501
FBgn0259740	2.78E-304	0.328413678	0.997	0.986	5.57E-301	0	FBgn0259740
FBgn0031090	3.31E-302	-0.564527541	0.891	0.891	6.63E-299	0	FBgn0031090
FBgn0020376	6.75E-302	-0.319673635	0.814	0.796	1.35E-298	0	FBgn0020376
FBgn0037750	2.50E-297	-0.385445171	0.694	0.735	5.00E-294	0	FBgn0037750
FBgn0030993	2.24E-296	0.420476754	0.852	0.771	4.48E-293	0	FBgn0030993
FBgn0000273	4.49E-296	-0.456624112	0.622	0.742	8.98E-293	0	FBgn0000273
FBgn0052528	4.58E-296	-0.489634176	0.716	0.801	9.15E-293	0	FBgn0052528
FBgn0085442	2.29E-294	-0.552982173	0.808	0.839	4.57E-291	0	FBgn0085442
FBgn0051363	1.75E-293	-0.768987823	0.994	0.991	3.50E-290	0	FBgn0051363
FBgn0001987	2.09E-293	-0.688154433	0.736	0.783	4.18E-290	0	FBgn0001987
FBgn0030670	3.05E-293	-0.492643147	0.739	0.811	6.11E-290	0	FBgn0030670
FBgn0015222	1.64E-292	0.422785297	0.97	0.941	3.28E-289	0	FBgn0015222
FBgn0026374	5.36E-292	-0.692219668	0.71	0.744	1.07E-288	0	FBgn0026374
FBgn0010909	2.02E-291	-0.514214332	0.808	0.871	4.03E-288	0	FBgn0010909
FBgn0040206	6.66E-291	-0.593299922	0.834	0.855	1.33E-287	0	FBgn0040206
FBgn0036341	2.86E-289	-0.47729092	0.725	0.835	5.71E-286	0	FBgn0036341
FBgn0041094	3.15E-289	0.264097227	0.867	0.807	6.31E-286	0	FBgn0041094
FBgn0028514	4.04E-288	-0.669058019	0.695	0.784	8.08E-285	0	FBgn0028514
FBgn0000723	5.45E-288	-0.584932355	0.817	0.866	1.09E-284	0	FBgn0000723
FBgn0262582	1.05E-285	-0.613177005	0.679	0.774	2.09E-282	0	FBgn0262582
FBgn0284257	2.61E-278	-0.365659928	0.792	0.858	5.22E-275	0	FBgn0284257
FBgn0035539	1.20E-277	-0.448900248	0.596	0.678	2.40E-274	0	FBgn0035539
FBgn0043070	2.91E-276	-0.721546332	0.848	0.892	5.81E-273	0	FBgn0043070
FBgn0030847	5.92E-276	-0.486833714	0.835	0.822	1.18E-272	0	FBgn0030847
FBgn0033309	3.50E-275	-0.458521238	0.705	0.8	6.99E-272	0	FBgn0033309
FBgn0030400	1.11E-274	-0.397801199	0.741	0.827	2.23E-271	0	FBgn0030400
FBgn0053111	7.71E-274	-0.427034375	0.648	0.731	1.54E-270	0	FBgn0053111
FBgn0032456	1.29E-272	0.262078603	0.841	0.72	2.58E-269	0	FBgn0032456
FBgn0264087	1.67E-267	-0.28643608	0.754	0.783	3.34E-264	0	FBgn0264087
FBgn0019661	2.19E-267	0.42713216	0.948	0.866	4.37E-264	0	FBgn0019661
FBgn0085359	5.40E-266	-1.002523648	0.843	0.853	1.08E-262	0	FBgn0085359
FBgn0035879	2.25E-264	-0.466295927	0.717	0.773	4.50E-261	0	FBgn0035879
FBgn0032731	6.21E-263	-0.512233049	0.96	0.952	1.24E-259	0	FBgn0032731
FBgn0050460	6.76E-263	-0.384266109	0.793	0.811	1.35E-259	0	FBgn0050460
FBgn0040099	3.94E-262	0.342586847	0.923	0.827	7.87E-259	0	FBgn0040099
FBgn0033212	1.41E-261	-0.327807632	0.575	0.701	2.82E-258	0	FBgn0033212
FBgn0035896	6.53E-261	-0.366242617	0.806	0.8	1.31E-257	0	FBgn0035896
FBgn0002873	1.89E-258	0.264207008	0.751	0.69	3.77E-255	0	FBgn0002873
FBgn0265174	2.17E-256	-0.384511284	0.695	0.775	4.33E-253	0	FBgn0265174
FBgn0263395	6.77E-254	-0.317154974	0.73	0.769	1.35E-250	0	FBgn0263395
FBgn0038516	3.19E-253	-0.292983061	0.814	0.838	6.37E-250	0	FBgn0038516
FBgn0264693	2.38E-251	-0.555412397	0.824	0.859	4.76E-248	0	FBgn0264693
FBgn0038053	3.18E-251	0.306667422	0.682	0.558	6.37E-248	0	FBgn0038053
FBgn0039747	6.47E-250	-0.716925093	0.753	0.779	1.29E-246	0	FBgn0039747
FBgn0016078	2.23E-248	-0.321398747	0.651	0.698	4.45E-245	0	FBgn0016078
FBgn0050090	1.43E-247	-0.359655697	0.52	0.666	2.86E-244	0	FBgn0050090
FBgn0032140	7.62E-245	-0.687651827	0.921	0.917	1.52E-241	0	FBgn0032140
FBgn0000579	4.91E-244	-0.534820285	0.933	0.962	9.82E-241	0	FBgn0000579
FBgn0026084	5.66E-244	-0.922069754	0.993	0.988	1.13E-240	0	FBgn0026084
FBgn0267252	9.68E-241	0.336053585	0.94	0.809	1.94E-237	0	FBgn0267252
FBgn0031374	2.51E-240	-0.386384929	0.577	0.728	5.02E-237	0	FBgn0031374
FBgn0011837	6.19E-237	0.328151483	0.911	0.83	1.24E-233	0	FBgn0011837
FBgn0003205	2.19E-236	-0.457134144	0.875	0.913	4.37E-233	0	FBgn0003205
FBgn0014869	2.96E-235	-0.495950596	0.836	0.861	5.92E-232	0	FBgn0014869
FBgn0014029	5.11E-235	-0.435823993	0.825	0.886	1.02E-231	0	FBgn0014029
FBgn0015229	3.24E-233	-0.549017299	0.579	0.7	6.48E-230	0	FBgn0015229
FBgn0005278	3.29E-233	0.263163598	0.923	0.801	6.59E-230	0	FBgn0005278
FBgn0031457	8.16E-233	-0.553075103	0.726	0.781	1.63E-229	0	FBgn0031457
FBgn0003124	8.22E-231	0.287593428	0.704	0.628	1.64E-227	0	FBgn0003124
FBgn0040070	4.95E-230	0.313399788	0.992	0.973	9.91E-227	0	FBgn0040070
FBgn0034894	1.91E-228	-0.594322728	0.802	0.84	3.82E-225	0	FBgn0034894
FBgn0032499	2.23E-228	-0.473456718	0.763	0.776	4.47E-225	0	FBgn0032499
FBgn0032857	3.07E-228	-0.554314688	0.827	0.79	6.14E-225	0	FBgn0032857
FBgn0267487	1.99E-227	-0.4432547	0.775	0.806	3.99E-224	0	FBgn0267487
FBgn0085354	4.28E-225	-0.496288013	0.832	0.83	8.56E-222	0	FBgn0085354
FBgn0261545	4.43E-225	-0.408840473	0.538	0.678	8.86E-222	0	FBgn0261545
FBgn0020414	2.28E-224	0.40745257	0.839	0.798	4.57E-221	0	FBgn0020414
FBgn0026630	2.57E-224	-0.312612754	0.713	0.768	5.14E-221	0	FBgn0026630
FBgn0035203	1.45E-221	-0.384089667	0.733	0.79	2.89E-218	0	FBgn0035203
FBgn0086370	6.92E-221	-0.420749346	0.831	0.816	1.38E-217	0	FBgn0086370
FBgn0004456	1.63E-220	-0.72121686	0.901	0.899	3.26E-217	0	FBgn0004456
FBgn0000064	4.93E-219	-0.456222013	0.868	0.92	9.86E-216	0	FBgn0000064
FBgn0035715	6.60E-217	-0.318727495	0.686	0.777	1.32E-213	0	FBgn0035715
FBgn0036816	1.09E-212	-0.311546948	0.896	0.893	2.18E-209	0	FBgn0036816
FBgn0036805	1.04E-211	-0.515689647	0.838	0.863	2.08E-208	0	FBgn0036805
FBgn0022709	2.43E-210	-0.749203261	0.821	0.801	4.86E-207	0	FBgn0022709
FBgn0261565	7.64E-210	-0.493061039	0.709	0.726	1.53E-206	0	FBgn0261565
FBgn0041171	1.52E-209	-0.277547743	0.747	0.778	3.05E-206	0	FBgn0041171
FBgn0003053	3.18E-208	-0.280241347	0.779	0.679	6.37E-205	0	FBgn0003053
FBgn0040299	3.95E-207	-0.577486388	0.765	0.749	7.90E-204	0	FBgn0040299
FBgn0015589	3.01E-205	-0.668735029	0.825	0.814	6.01E-202	0	FBgn0015589
FBgn0010424	5.02E-205	-1.262639839	0.88	0.879	1.00E-201	0	FBgn0010424
FBgn0040285	4.59E-204	-0.455361634	0.931	0.948	9.18E-201	0	FBgn0040285
FBgn0031150	2.43E-203	-0.633550462	0.764	0.771	4.86E-200	0	FBgn0031150
FBgn0045842	4.54E-203	-0.308115725	0.732	0.769	9.08E-200	0	FBgn0045842
FBgn0039026	1.14E-202	-0.364082909	0.699	0.776	2.27E-199	0	FBgn0039026
FBgn0004387	4.93E-201	-0.418707809	0.622	0.705	9.85E-198	0	FBgn0004387
FBgn0013272	2.73E-199	-0.315115012	0.701	0.751	5.47E-196	0	FBgn0013272
FBgn0260746	6.04E-199	-0.438809639	0.704	0.723	1.21E-195	0	FBgn0260746
FBgn0032191	3.85E-198	-0.531182811	0.856	0.865	7.70E-195	0	FBgn0032191
FBgn0028563	7.30E-198	-0.354442824	0.771	0.771	1.46E-194	0	FBgn0028563
FBgn0033033	9.00E-195	-0.791286736	0.823	0.782	1.80E-191	0	FBgn0033033
FBgn0040296	8.01E-189	-0.733058996	0.78	0.782	1.60E-185	0	FBgn0040296
FBgn0003514	1.09E-187	-0.391275744	0.936	0.952	2.17E-184	0	FBgn0003514
FBgn0010225	2.12E-187	0.375502603	0.75	0.702	4.25E-184	0	FBgn0010225
FBgn0034443	3.11E-187	-0.713279041	0.927	0.939	6.23E-184	0	FBgn0034443
FBgn0031973	9.20E-181	0.273685699	0.667	0.62	1.84E-177	0	FBgn0031973
FBgn0051075	3.77E-177	0.417256551	0.822	0.809	7.54E-174	0	FBgn0051075
FBgn0261802	4.30E-176	0.267146459	0.683	0.613	8.60E-173	0	FBgn0261802
FBgn0028546	4.50E-175	-0.467800133	0.86	0.861	9.01E-172	0	FBgn0028546
FBgn0045073	1.78E-174	-0.338596761	0.741	0.821	3.57E-171	0	FBgn0045073
FBgn0041585	7.72E-174	-0.349753484	0.707	0.772	1.54E-170	0	FBgn0041585
FBgn0262716	4.78E-173	-0.404279757	0.937	0.931	9.55E-170	0	FBgn0262716
FBgn0033649	9.76E-173	-0.298902476	0.733	0.749	1.95E-169	0	FBgn0033649
FBgn0266417	4.95E-172	-0.515344629	0.698	0.774	9.90E-169	0	FBgn0266417
FBgn0031470	5.79E-170	-0.285294474	0.778	0.778	1.16E-166	0	FBgn0031470
FBgn0033188	1.32E-169	-0.449019739	0.692	0.758	2.65E-166	0	FBgn0033188
FBgn0001248	1.43E-169	0.375927143	0.737	0.669	2.86E-166	0	FBgn0001248
FBgn0031637	8.85E-169	-0.252629129	0.596	0.711	1.77E-165	0	FBgn0031637
FBgn0015000	1.29E-168	-0.29879535	0.693	0.753	2.58E-165	0	FBgn0015000
FBgn0027580	2.16E-168	-0.330848059	0.863	0.841	4.32E-165	0	FBgn0027580
FBgn0030328	1.28E-167	-0.339195222	0.819	0.847	2.55E-164	0	FBgn0030328
FBgn0261556	4.05E-167	0.311789033	0.721	0.613	8.10E-164	0	FBgn0261556
FBgn0001226	1.96E-162	0.352199382	0.713	0.636	3.92E-159	0	FBgn0001226
FBgn0019968	2.74E-162	-0.533640901	0.699	0.75	5.49E-159	0	FBgn0019968
FBgn0036877	4.58E-159	-0.377201312	0.713	0.691	9.16E-156	0	FBgn0036877
FBgn0020510	6.56E-159	-0.355263557	0.842	0.848	1.31E-155	0	FBgn0020510
FBgn0085421	2.08E-158	-0.286842244	0.536	0.611	4.17E-155	0	FBgn0085421
FBgn0053542	2.69E-157	-0.250332308	0.794	0.759	5.37E-154	0	FBgn0053542
FBgn0041182	7.69E-157	-0.40276152	0.799	0.822	1.54E-153	0	FBgn0041182
FBgn0085478	5.27E-152	-0.285545385	0.743	0.812	1.05E-148	0	FBgn0085478
FBgn0025641	7.71E-152	-0.298866206	0.61	0.678	1.54E-148	0	FBgn0025641
FBgn0004574	8.75E-151	-0.361478996	0.796	0.833	1.75E-147	0	FBgn0004574
FBgn0000277	1.44E-150	-0.275560662	0.88	0.854	2.87E-147	0	FBgn0000277
FBgn0032156	1.55E-150	-0.27326932	0.616	0.702	3.10E-147	0	FBgn0032156
FBgn0259243	2.06E-150	-0.420434517	0.779	0.784	4.12E-147	0	FBgn0259243
FBgn0037465	1.26E-149	-0.348279006	0.674	0.714	2.51E-146	0	FBgn0037465
FBgn0026479	1.73E-149	-0.287714007	0.82	0.815	3.45E-146	0	FBgn0026479
FBgn0010051	1.73E-149	-0.355855631	0.715	0.737	3.46E-146	0	FBgn0010051
FBgn0265991	8.76E-149	-0.520381909	0.761	0.811	1.75E-145	0	FBgn0265991
FBgn0020251	2.32E-148	-0.541958596	0.738	0.768	4.64E-145	0	FBgn0020251
FBgn0040064	7.84E-142	0.268009596	0.834	0.792	1.57E-138	0	FBgn0040064
FBgn0020304	2.26E-141	-0.476914409	0.687	0.752	4.52E-138	0	FBgn0020304
FBgn0038679	7.38E-141	-0.63117635	0.829	0.793	1.48E-137	0	FBgn0038679
FBgn0039108	8.89E-140	-0.469689202	0.741	0.762	1.78E-136	0	FBgn0039108
FBgn0261570	3.63E-139	-0.363249423	0.775	0.783	7.27E-136	0	FBgn0261570
FBgn0038353	5.54E-138	0.273075699	0.668	0.581	1.11E-134	0	FBgn0038353
FBgn0015795	1.45E-137	-0.442455792	0.861	0.873	2.90E-134	0	FBgn0015795
FBgn0030048	1.61E-137	-0.348503299	0.766	0.761	3.22E-134	0	FBgn0030048
FBgn0034720	1.43E-135	-0.424224995	0.8	0.758	2.86E-132	0	FBgn0034720
FBgn0261244	2.30E-135	-0.434491307	0.792	0.819	4.60E-132	0	FBgn0261244
FBgn0010406	7.16E-135	-0.340776796	0.764	0.765	1.43E-131	0	FBgn0010406
FBgn0028490	4.90E-134	-0.487694047	0.772	0.829	9.80E-131	0	FBgn0028490
FBgn0266420	6.63E-134	0.288873333	0.778	0.764	1.33E-130	0	FBgn0266420
FBgn0015286	2.51E-133	-0.319994628	0.86	0.878	5.03E-130	0	FBgn0015286
FBgn0028663	2.52E-132	-0.29637274	0.933	0.947	5.04E-129	0	FBgn0028663
FBgn0039266	3.44E-132	-0.288468747	0.721	0.755	6.88E-129	0	FBgn0039266
FBgn0285910	2.68E-131	-0.291734169	0.855	0.892	5.36E-128	0	FBgn0285910
FBgn0085360	5.49E-131	0.317950787	0.627	0.465	1.10E-127	0	FBgn0085360
FBgn0032897	4.59E-130	-0.946518292	0.908	0.871	9.17E-127	0	FBgn0032897
FBgn0036318	5.38E-129	-0.334275522	0.744	0.786	1.08E-125	0	FBgn0036318
FBgn0086694	4.27E-127	-0.26842203	0.587	0.666	8.54E-124	0	FBgn0086694
FBgn0014009	2.45E-126	-0.37159348	0.836	0.866	4.89E-123	0	FBgn0014009
FBgn0023407	4.36E-126	-0.260083171	0.824	0.796	8.72E-123	0	FBgn0023407
FBgn0001104	1.10E-125	-0.33205958	0.899	0.908	2.20E-122	0	FBgn0001104
FBgn0030412	4.78E-125	-0.546072759	0.692	0.731	9.57E-122	0	FBgn0030412
FBgn0086372	7.48E-125	-0.314061452	0.676	0.756	1.50E-121	0	FBgn0086372
FBgn0263773	6.28E-122	-0.474722487	0.388	0.528	1.26E-118	0	FBgn0263773
FBgn0039056	3.19E-121	-0.359143884	0.667	0.715	6.39E-118	0	FBgn0039056
FBgn0050148	5.27E-119	-0.269570218	0.712	0.707	1.05E-115	0	FBgn0050148
FBgn0031143	2.38E-118	-0.346735774	0.854	0.868	4.77E-115	0	FBgn0031143
FBgn0031030	1.11E-117	-0.313228179	0.727	0.76	2.22E-114	0	FBgn0031030
FBgn0034970	5.17E-117	-0.265836371	0.769	0.8	1.03E-113	0	FBgn0034970
FBgn0004629	3.47E-115	0.308982791	0.735	0.705	6.94E-112	0	FBgn0004629
FBgn0047178	7.38E-115	-0.439239865	0.734	0.786	1.48E-111	0	FBgn0047178
FBgn0045852	2.78E-114	-0.455471657	0.761	0.84	5.56E-111	0	FBgn0045852
FBgn0259178	2.81E-114	-0.320448254	0.713	0.712	5.63E-111	0	FBgn0259178
FBgn0261444	2.45E-113	0.268373204	0.734	0.69	4.89E-110	0	FBgn0261444
FBgn0035623	2.39E-107	-0.366327956	0.975	0.969	4.79E-104	0	FBgn0035623
FBgn0031080	9.10E-106	-0.683342096	0.824	0.77	1.82E-102	0	FBgn0031080
FBgn0002645	3.33E-105	-0.301829254	0.871	0.867	6.66E-102	0	FBgn0002645
FBgn0034583	4.18E-104	-0.295111183	0.708	0.796	8.36E-101	0	FBgn0034583
FBgn0036518	6.56E-102	-0.306024225	0.922	0.912	1.31E-98	0	FBgn0036518
FBgn0016672	2.64E-101	-0.564144099	0.834	0.814	5.27E-98	0	FBgn0016672
FBgn0000636	5.34E-100	-0.414824638	0.752	0.701	1.07E-96	0	FBgn0000636
FBgn0011666	2.92E-98	-0.262725498	0.755	0.81	5.83E-95	0	FBgn0011666
FBgn0003447	3.05E-98	-0.568905555	0.696	0.753	6.09E-95	0	FBgn0003447
FBgn0035400	6.72E-97	-0.297977167	0.719	0.751	1.34E-93	0	FBgn0035400
FBgn0262563	8.18E-96	-0.384180952	0.85	0.823	1.64E-92	0	FBgn0262563
FBgn0033906	2.11E-95	-0.305364592	0.901	0.913	4.22E-92	0	FBgn0033906
FBgn0283741	4.66E-95	-0.322472751	0.681	0.696	9.32E-92	0	FBgn0283741
FBgn0000017	2.14E-94	-0.334619459	0.831	0.828	4.27E-91	0	FBgn0000017
FBgn0039759	2.59E-92	-0.532220175	0.885	0.859	5.18E-89	0	FBgn0039759
FBgn0026189	3.51E-92	-0.448362173	0.94	0.902	7.02E-89	0	FBgn0026189
FBgn0000276	9.09E-92	-0.359454634	0.908	0.865	1.82E-88	0	FBgn0000276
FBgn0026620	1.28E-91	-0.303457225	0.771	0.768	2.55E-88	0	FBgn0026620
FBgn0261260	9.38E-91	-0.715733448	0.8	0.79	1.88E-87	0	FBgn0261260
FBgn0266186	2.76E-88	-0.284774952	0.922	0.923	5.53E-85	0	FBgn0266186
FBgn0026160	1.29E-85	-0.264517263	0.547	0.635	2.58E-82	0	FBgn0026160
FBgn0263930	2.25E-84	-0.470359616	0.838	0.761	4.49E-81	0	FBgn0263930
FBgn0011232	4.62E-84	-0.267151634	0.762	0.754	9.23E-81	0	FBgn0011232
FBgn0037387	3.29E-80	-0.269339665	0.752	0.694	6.58E-77	0	FBgn0037387
FBgn0020653	1.33E-79	-0.267243908	0.91	0.926	2.66E-76	0	FBgn0020653
FBgn0035964	5.59E-79	-0.446483492	0.856	0.827	1.12E-75	0	FBgn0035964
FBgn0035587	1.07E-78	-0.437060423	0.896	0.875	2.15E-75	0	FBgn0035587
FBgn0052672	1.22E-78	-0.366532024	0.895	0.902	2.43E-75	0	FBgn0052672
FBgn0036643	1.98E-74	-0.262539304	0.76	0.748	3.96E-71	0	FBgn0036643
FBgn0001624	2.40E-73	-0.29810642	0.77	0.787	4.81E-70	0	FBgn0001624
FBgn0031213	3.30E-73	-0.568780643	0.866	0.838	6.59E-70	0	FBgn0031213
FBgn0052626	7.39E-73	-0.278718344	0.848	0.827	1.48E-69	0	FBgn0052626
FBgn0028984	2.53E-71	-0.504958215	0.877	0.851	5.06E-68	0	FBgn0028984
FBgn0037541	2.82E-65	-0.30513985	0.757	0.725	5.64E-62	0	FBgn0037541
FBgn0034638	3.17E-63	-0.479671741	0.866	0.849	6.35E-60	0	FBgn0034638
FBgn0035497	3.28E-63	-0.270288471	0.637	0.655	6.56E-60	0	FBgn0035497
FBgn0038088	1.38E-61	-0.669216419	0.87	0.818	2.76E-58	0	FBgn0038088
FBgn0034200	2.40E-58	-0.274706363	0.838	0.814	4.80E-55	0	FBgn0034200
FBgn0030160	2.48E-58	-0.29438547	0.87	0.833	4.97E-55	0	FBgn0030160
FBgn0001091	2.50E-58	-0.36157496	0.873	0.885	5.00E-55	0	FBgn0001091
FBgn0039051	1.52E-55	-0.334852175	0.76	0.619	3.04E-52	0	FBgn0039051
FBgn0085390	1.00E-53	-0.28962729	0.59	0.575	2.00E-50	0	FBgn0085390
FBgn0085452	2.13E-53	-0.548808325	0.88	0.883	4.26E-50	0	FBgn0085452
FBgn0036053	4.06E-53	-0.324335771	0.845	0.792	8.11E-50	0	FBgn0036053
FBgn0038243	2.11E-48	-0.264769818	0.757	0.781	4.23E-45	0	FBgn0038243
FBgn0010238	1.44E-45	-0.326713946	0.811	0.82	2.89E-42	0	FBgn0010238
FBgn0267849	3.45E-45	-0.309964497	0.796	0.746	6.91E-42	0	FBgn0267849
FBgn0051769	1.11E-42	-0.501460919	0.927	0.894	2.23E-39	0	FBgn0051769
FBgn0032318	4.63E-40	-0.950433722	0.903	0.858	9.26E-37	0	FBgn0032318
FBgn0265413	2.26E-39	-0.665360731	0.937	0.932	4.51E-36	0	FBgn0265413
FBgn0013718	2.65E-39	-0.254631535	0.853	0.817	5.30E-36	0	FBgn0013718
FBgn0031307	2.50E-36	-0.504581096	0.829	0.841	5.00E-33	0	FBgn0031307
FBgn0264437	2.22E-35	-0.684922147	0.905	0.902	4.44E-32	0	FBgn0264437
FBgn0029896	3.73E-34	-0.348707898	0.847	0.844	7.46E-31	0	FBgn0029896
FBgn0035049	5.74E-30	-0.403545326	0.734	0.742	1.15E-26	0	FBgn0035049
FBgn0027657	9.05E-30	-0.506486862	0.847	0.802	1.81E-26	0	FBgn0027657
FBgn0025628	1.75E-24	-0.359727869	0.723	0.746	3.50E-21	0	FBgn0025628
FBgn0022774	1.11E-23	0.266685429	0.597	0.604	2.21E-20	0	FBgn0022774
FBgn0002719	7.94E-23	-0.309931277	0.938	0.893	1.59E-19	0	FBgn0002719
FBgn0000279	1.74E-22	-0.371710601	0.963	0.939	3.49E-19	0	FBgn0000279
FBgn0029507	5.10E-21	-0.46957984	0.96	0.926	1.02E-17	0	FBgn0029507
FBgn0265191	6.98E-21	-0.285012623	0.762	0.698	1.40E-17	0	FBgn0265191
FBgn0035679	1.05E-20	-0.451724029	0.672	0.684	2.10E-17	0	FBgn0035679
FBgn0283437	1.32E-14	-1.208295903	0.82	0.808	2.65E-11	0	FBgn0283437
FBgn0030653	6.22E-13	-0.308949089	0.476	0.518	1.24E-09	0	FBgn0030653
FBgn0037063	1.71E-09	-0.252998026	0.888	0.858	3.42E-06	0	FBgn0037063
FBgn0035189	2.64E-05	-0.32800293	0.626	0.565	0.052728937	0	FBgn0035189
FBgn0264894	0.000245603	-0.306872106	0.78	0.773	0.491206415	0	FBgn0264894
FBgn0033635	0.002026159	-0.311922917	0.965	0.956	1	0	FBgn0033635
FBgn0010387.1	0	1.234999664	0.876	0.78	0	1	FBgn0010387
FBgn0265375.1	0	1.142787357	0.97	0.857	0	1	FBgn0265375
FBgn0039844.1	0	1.135063592	0.948	0.835	0	1	FBgn0039844
FBgn0033446.1	0	1.084781044	0.994	0.938	0	1	FBgn0033446
FBgn0028514.1	0	1.072916095	0.901	0.718	0	1	FBgn0028514
FBgn0033448.1	0	1.048180722	0.979	0.901	0	1	FBgn0033448
FBgn0028480.1	0	1.038839862	0.947	0.817	0	1	FBgn0028480
FBgn0004569.1	0	1.015490635	0.893	0.796	0	1	FBgn0004569
FBgn0031547.1	0	0.96557536	0.981	0.907	0	1	FBgn0031547
FBgn0002868.1	0	0.962408449	1	0.994	0	1	FBgn0002868
FBgn0041710.1	0	0.946978615	0.961	0.85	0	1	FBgn0041710
FBgn0033469.1	0	0.918137197	0.948	0.885	0	1	FBgn0033469
FBgn0003748.1	0	0.914316016	0.939	0.873	0	1	FBgn0003748
FBgn0053461.1	0	0.87969386	0.906	0.624	0	1	FBgn0053461
FBgn0045852.1	0	0.744296797	0.938	0.783	0	1	FBgn0045852
FBgn0034417.1	0	0.732532832	0.927	0.865	0	1	FBgn0034417
FBgn0050035.1	0	0.727589146	0.908	0.85	0	1	FBgn0050035
FBgn0263118.1	0	0.70931154	0.913	0.814	0	1	FBgn0263118
FBgn0262699.1	0	0.683489355	0.911	0.807	0	1	FBgn0262699
FBgn0041183.1	0	0.664651019	0.986	0.921	0	1	FBgn0041183
FBgn0030529.1	0	0.658163556	0.985	0.933	0	1	FBgn0030529
FBgn0030396.1	0	0.622194247	0.97	0.898	0	1	FBgn0030396
FBgn0037723.1	0	0.589493331	0.936	0.868	0	1	FBgn0037723
FBgn0035603.1	0	0.581822277	0.967	0.92	0	1	FBgn0035603
FBgn0263077.1	0	0.575598727	0.847	0.69	0	1	FBgn0263077
FBgn0261363.1	0	0.568865628	0.983	0.953	0	1	FBgn0261363
FBgn0052412.1	0	0.561383234	0.85	0.797	0	1	FBgn0052412
FBgn0052626.1	0	0.558386454	0.875	0.823	0	1	FBgn0052626
FBgn0038206.1	0	0.551299427	0.929	0.853	0	1	FBgn0038206
FBgn0035623.1	0	0.512802579	0.99	0.965	0	1	FBgn0035623
FBgn0026630.1	0	0.508570512	0.844	0.727	0	1	FBgn0026630
FBgn0015790.1	0	0.496039924	0.982	0.934	0	1	FBgn0015790
FBgn0034219.1	0	0.479512009	0.975	0.92	0	1	FBgn0034219
FBgn0000253.1	0	0.458936563	1	1	0	1	FBgn0000253
FBgn0001149.1	0	0.445476623	0.998	0.98	0	1	FBgn0001149
FBgn0003888.1	0	0.43418394	0.998	0.988	0	1	FBgn0003888
FBgn0003884.1	0	0.432285573	1	1	0	1	FBgn0003884
FBgn0053542.1	0	0.425281694	0.835	0.752	0	1	FBgn0053542
FBgn0014141.1	0	0.418270432	0.997	0.965	0	1	FBgn0014141
FBgn0033913	0	0.417651668	0.92	0.831	0	1	FBgn0033913
FBgn0041184	0	0.416587181	0.82	0.679	0	1	FBgn0041184
FBgn0032422.1	0	0.37717044	0.996	0.976	0	1	FBgn0032422
FBgn0030040.1	0	0.360231062	0.999	0.982	0	1	FBgn0030040
FBgn0022160	0	0.337302808	0.85	0.782	0	1	FBgn0022160
FBgn0264437.1	0	0.334787496	0.949	0.891	0	1	FBgn0264437
FBgn0000043.1	0	0.332570326	1	1	0	1	FBgn0000043
FBgn0085307	0	0.330737912	0.822	0.662	0	1	FBgn0085307
FBgn0013672.1	0	0.327311551	1	0.997	0	1	FBgn0013672
FBgn0000042.1	0	0.300505482	1	1	0	1	FBgn0000042
FBgn0002778	0	0.286561417	0.922	0.854	0	1	FBgn0002778
FBgn0000277.1	0	0.27464115	0.884	0.856	0	1	FBgn0000277
FBgn0013674	0	0.26824085	1	0.999	0	1	FBgn0013674
FBgn0013675.1	0	0.264424831	1	0.998	0	1	FBgn0013675
FBgn0013679	0	0.253875211	0.999	0.998	0	1	FBgn0013679
FBgn0039113	0	-0.273976375	0.549	0.8	0	1	FBgn0039113
FBgn0039209	0	-0.316513496	0.677	0.768	0	1	FBgn0039209
FBgn0032638.1	0	-0.317221934	0.653	0.828	0	1	FBgn0032638
FBgn0053558.1	0	-0.321771382	0.69	0.825	0	1	FBgn0053558
FBgn0086450	0	-0.327704798	0.743	0.848	0	1	FBgn0086450
FBgn0053329	0	-0.330318875	0.627	0.796	0	1	FBgn0053329
FBgn0260991.1	0	-0.342715511	0.691	0.78	0	1	FBgn0260991
FBgn0039051.1	0	-0.346592021	0.438	0.722	0	1	FBgn0039051
FBgn0052638	0	-0.360588668	0.693	0.799	0	1	FBgn0052638
FBgn0029896.1	0	-0.37595872	0.813	0.853	0	1	FBgn0029896
FBgn0050015	0	-0.399975757	0.71	0.84	0	1	FBgn0050015
FBgn0034880	0	-0.410396028	0.573	0.82	0	1	FBgn0034880
FBgn0063494	0	-0.437027651	0.795	0.9	0	1	FBgn0063494
FBgn0027594.1	0	-0.444995729	0.499	0.734	0	1	FBgn0027594
FBgn0264343.1	0	-0.466267321	0.804	0.89	0	1	FBgn0264343
FBgn0267910	0	-0.467653264	1	1	0	1	FBgn0267910
FBgn0041094.1	0	-0.507286664	0.747	0.846	0	1	FBgn0041094
FBgn0020416.1	0	-0.551240235	0.628	0.758	0	1	FBgn0020416
FBgn0028331.1	0	-0.5818417	0.594	0.725	0	1	FBgn0028331
FBgn0031913.1	0	-0.597800233	0.725	0.881	0	1	FBgn0031913
FBgn0015222.1	0	-0.611102817	0.924	0.957	0	1	FBgn0015222
FBgn0033777.1	0	-0.623673982	0.681	0.842	0	1	FBgn0033777
FBgn0037228.1	0	-0.672972819	0.606	0.795	0	1	FBgn0037228
FBgn0032889.1	0	-0.692188886	0.827	0.907	0	1	FBgn0032889
FBgn0034398.1	0	-0.698905532	0.8	0.895	0	1	FBgn0034398
FBgn0039776.1	0	-0.704311909	0.82	0.891	0	1	FBgn0039776
FBgn0003525.1	0	-0.725933714	0.749	0.81	0	1	FBgn0003525
FBgn0031453.1	0	-0.736790064	0.933	0.966	0	1	FBgn0031453
FBgn0260768.1	0	-0.749277421	0.859	0.923	0	1	FBgn0260768
FBgn0043841	0	-0.750406113	0.74	0.873	0	1	FBgn0043841
FBgn0283461.1	0	-0.760199452	0.863	0.903	0	1	FBgn0283461
FBgn0011837.1	0	-0.765057858	0.713	0.892	0	1	FBgn0011837
FBgn0016075.1	0	-0.775774742	0.613	0.779	0	1	FBgn0016075
FBgn0036144.1	0	-0.776359161	0.645	0.82	0	1	FBgn0036144
FBgn0033635.1	0	-0.787715815	0.953	0.961	0	1	FBgn0033635
FBgn0033949.1	0	-0.796330398	0.471	0.713	0	1	FBgn0033949
FBgn0032006.1	0	-0.796402394	0.797	0.885	0	1	FBgn0032006
FBgn0261628.1	0	-0.805506316	0.629	0.803	0	1	FBgn0261628
FBgn0035076.1	0	-0.807181826	0.491	0.728	0	1	FBgn0035076
FBgn0002719.1	0	-0.807755084	0.836	0.926	0	1	FBgn0002719
FBgn0004449.1	0	-0.811127855	0.593	0.801	0	1	FBgn0004449
FBgn0013770.1	0	-0.814687073	0.944	0.973	0	1	FBgn0013770
FBgn0040070.1	0	-0.840013249	0.954	0.985	0	1	FBgn0040070
FBgn0266569.1	0	-0.856895514	0.869	0.929	0	1	FBgn0266569
FBgn0030796.1	0	-0.857922418	0.714	0.871	0	1	FBgn0030796
FBgn0026721.1	0	-0.868341167	0.645	0.783	0	1	FBgn0026721
FBgn0004167.1	0	-0.88327961	0.838	0.914	0	1	FBgn0004167
FBgn0020415.1	0	-0.901263627	0.884	0.946	0	1	FBgn0020415
FBgn0045823.1	0	-0.904500225	0.918	0.961	0	1	FBgn0045823
FBgn0042106.1	0	-0.909397772	0.818	0.944	0	1	FBgn0042106
FBgn0040099.1	0	-0.910761922	0.767	0.88	0	1	FBgn0040099
FBgn0029507.1	0	-0.92683729	0.903	0.945	0	1	FBgn0029507
FBgn0051324.1	0	-0.927370173	0.883	0.947	0	1	FBgn0051324
FBgn0029092.1	0	-0.951269132	0.683	0.864	0	1	FBgn0029092
FBgn0267348.1	0	-0.952330213	0.777	0.894	0	1	FBgn0267348
FBgn0040752.1	0	-0.975752487	0.723	0.855	0	1	FBgn0040752
FBgn0029147.1	0	-1.064298981	0.579	0.792	0	1	FBgn0029147
FBgn0261800.1	0	-1.073101442	0.797	0.891	0	1	FBgn0261800
FBgn0031261.1	0	-1.089035478	0.704	0.897	0	1	FBgn0031261
FBgn0002526.1	0	-1.093511365	0.803	0.898	0	1	FBgn0002526
FBgn0031327.1	0	-1.10358626	0.833	0.92	0	1	FBgn0031327
FBgn0265140.1	0	-1.121875176	0.814	0.952	0	1	FBgn0265140
FBgn0259896.1	0	-1.185707388	0.758	0.886	0	1	FBgn0259896
FBgn0029506.1	0	-1.219775346	0.854	0.958	0	1	FBgn0029506
FBgn0001114.1	0	-1.263866226	0.613	0.838	0	1	FBgn0001114
FBgn0003137.1	0	-1.290901839	0.98	0.984	0	1	FBgn0003137
FBgn0034761.1	0	-1.31188773	0.947	0.981	0	1	FBgn0034761
FBgn0026562.1	0	-1.319272179	0.839	0.93	0	1	FBgn0026562
FBgn0000299.1	0	-1.335794985	0.805	0.91	0	1	FBgn0000299
FBgn0011828.1	0	-1.383650181	0.79	0.9	0	1	FBgn0011828
FBgn0014163.1	0	-1.551629603	0.864	0.936	0	1	FBgn0014163
FBgn0033724.1	0	-1.634708951	0.885	0.962	0	1	FBgn0033724
FBgn0029167.1	0	-1.725194587	0.764	0.913	0	1	FBgn0029167
FBgn0025814.1	1.51E-303	-0.273888103	0.628	0.769	3.03E-300	1	FBgn0025814
FBgn0259481.1	5.33E-301	0.479369824	0.902	0.757	1.07E-297	1	FBgn0259481
FBgn0033725.1	8.50E-298	-0.59927511	0.805	0.828	1.70E-294	1	FBgn0033725
FBgn0261988.1	4.27E-297	0.501174651	0.878	0.8	8.55E-294	1	FBgn0261988
FBgn0029937	4.64E-297	-0.38238129	0.655	0.784	9.29E-294	1	FBgn0029937
FBgn0032405.1	1.07E-296	-0.49706436	0.537	0.697	2.13E-293	1	FBgn0032405
FBgn0262794	2.24E-296	0.284259794	0.98	0.949	4.48E-293	1	FBgn0262794
FBgn0026315.1	1.85E-291	0.423557409	0.855	0.717	3.71E-288	1	FBgn0026315
FBgn0037468	9.97E-290	-0.637641079	0.895	0.951	1.99E-286	1	FBgn0037468
FBgn0259735.1	8.57E-288	-0.465347056	0.707	0.826	1.71E-284	1	FBgn0259735
FBgn0259111.1	1.35E-285	-0.42960321	0.42	0.669	2.69E-282	1	FBgn0259111
FBgn0267001	3.39E-283	-0.254880924	0.619	0.713	6.79E-280	1	FBgn0267001
FBgn0014011.1	5.21E-283	0.376390608	0.975	0.922	1.04E-279	1	FBgn0014011
FBgn0038088.1	4.66E-282	-0.650776397	0.713	0.866	9.31E-279	1	FBgn0038088
FBgn0259221.1	6.89E-278	0.39907639	0.832	0.718	1.38E-274	1	FBgn0259221
FBgn0051313	1.96E-277	-0.27853417	0.835	0.878	3.93E-274	1	FBgn0051313
FBgn0037063.1	3.89E-277	-0.335655159	0.816	0.881	7.79E-274	1	FBgn0037063
FBgn0000578.1	2.65E-275	-0.579323535	0.567	0.73	5.29E-272	1	FBgn0000578
FBgn0037843.1	2.58E-272	0.455320032	0.927	0.877	5.16E-269	1	FBgn0037843
FBgn0003093.1	3.24E-272	0.492859991	0.854	0.711	6.49E-269	1	FBgn0003093
FBgn0259979	7.01E-271	-0.53973771	0.874	0.929	1.40E-267	1	FBgn0259979
FBgn0037720.1	2.27E-269	0.420414222	0.864	0.759	4.53E-266	1	FBgn0037720
FBgn0038842.1	1.18E-265	0.428411589	0.996	0.977	2.36E-262	1	FBgn0038842
FBgn0033476	3.24E-263	-0.302269737	0.58	0.705	6.48E-260	1	FBgn0033476
FBgn0260746.1	4.59E-262	0.515821141	0.779	0.701	9.19E-259	1	FBgn0260746
FBgn0033504.1	1.04E-259	0.256811053	0.921	0.844	2.08E-256	1	FBgn0033504
FBgn0265413.1	2.57E-259	-0.936695656	0.904	0.941	5.14E-256	1	FBgn0265413
FBgn0013763.1	5.93E-259	-0.725808277	0.887	0.915	1.19E-255	1	FBgn0013763
FBgn0003218.1	1.81E-257	0.329619512	0.94	0.868	3.62E-254	1	FBgn0003218
FBgn0033153.1	9.66E-257	-0.521898142	0.574	0.744	1.93E-253	1	FBgn0033153
FBgn0040813.1	3.38E-256	-1.040035634	0.991	0.992	6.77E-253	1	FBgn0040813
FBgn0040064.1	3.92E-254	-0.433132794	0.754	0.819	7.84E-251	1	FBgn0040064
FBgn0020376.1	1.10E-251	0.383318076	0.826	0.795	2.20E-248	1	FBgn0020376
FBgn0035978	4.40E-250	-0.269678685	0.693	0.773	8.80E-247	1	FBgn0035978
FBgn0001291.1	7.42E-250	0.417444938	0.93	0.84	1.48E-246	1	FBgn0001291
FBgn0283427	8.60E-248	-0.289283454	0.797	0.858	1.72E-244	1	FBgn0283427
FBgn0031738.1	1.11E-247	-0.35317469	0.692	0.758	2.23E-244	1	FBgn0031738
FBgn0262160.1	1.02E-245	0.429956482	0.891	0.792	2.05E-242	1	FBgn0262160
FBgn0243514.1	2.38E-245	-0.582364876	0.476	0.662	4.75E-242	1	FBgn0243514
FBgn0037044	2.09E-242	0.367807873	0.77	0.673	4.18E-239	1	FBgn0037044
FBgn0050115.1	5.34E-242	0.497516689	0.78	0.634	1.07E-238	1	FBgn0050115
FBgn0028542.1	1.20E-238	-0.581467436	0.605	0.738	2.39E-235	1	FBgn0028542
FBgn0015221.1	2.65E-238	-0.525587108	0.937	0.955	5.29E-235	1	FBgn0015221
FBgn0035587.1	1.12E-233	-0.466942363	0.84	0.892	2.24E-230	1	FBgn0035587
FBgn0262881.1	2.44E-233	-0.727060522	0.542	0.71	4.89E-230	1	FBgn0262881
FBgn0040091.1	5.06E-231	-0.356423784	0.71	0.778	1.01E-227	1	FBgn0040091
FBgn0265191.1	6.12E-231	-0.272270807	0.596	0.75	1.22E-227	1	FBgn0265191
FBgn0038890.1	7.14E-230	0.394347517	0.898	0.841	1.43E-226	1	FBgn0038890
FBgn0052264.1	3.69E-229	0.325892159	0.845	0.732	7.38E-226	1	FBgn0052264
FBgn0286071.1	1.48E-228	0.415967629	0.812	0.804	2.97E-225	1	FBgn0286071
FBgn0027558.1	2.66E-228	0.286106281	0.763	0.661	5.33E-225	1	FBgn0027558
FBgn0024238.1	8.74E-228	0.312708663	0.951	0.912	1.75E-224	1	FBgn0024238
FBgn0030575	4.26E-227	0.260390704	0.675	0.655	8.51E-224	1	FBgn0030575
FBgn0015924	3.38E-226	-0.482743391	0.475	0.658	6.77E-223	1	FBgn0015924
FBgn0267727.1	2.28E-225	-0.702086262	0.765	0.873	4.56E-222	1	FBgn0267727
FBgn0262808	2.07E-223	0.388521877	0.701	0.68	4.13E-220	1	FBgn0262808
FBgn0016078.1	7.95E-223	0.37427119	0.748	0.667	1.59E-219	1	FBgn0016078
FBgn0011722.1	1.30E-221	-0.62420369	0.705	0.765	2.59E-218	1	FBgn0011722
FBgn0002773	3.45E-221	-0.339889352	0.836	0.873	6.90E-218	1	FBgn0002773
FBgn0029093.1	8.32E-221	-0.580965167	0.833	0.898	1.66E-217	1	FBgn0029093
FBgn0001941.1	2.26E-220	0.388575994	0.947	0.918	4.53E-217	1	FBgn0001941
FBgn0250848.1	1.50E-218	-0.525890141	0.828	0.862	2.99E-215	1	FBgn0250848
FBgn0058469	1.84E-214	-0.431017216	0.976	0.984	3.67E-211	1	FBgn0058469
FBgn0031037	1.21E-213	-0.432135402	0.741	0.785	2.42E-210	1	FBgn0031037
FBgn0028990.1	3.73E-211	-0.359009734	0.661	0.74	7.46E-208	1	FBgn0028990
FBgn0036030	2.16E-210	-0.270950334	0.84	0.869	4.33E-207	1	FBgn0036030
FBgn0002924.1	2.23E-208	-0.252563299	0.631	0.732	4.47E-205	1	FBgn0002924
FBgn0034724	9.30E-208	-0.264607471	0.816	0.899	1.86E-204	1	FBgn0034724
FBgn0086254.1	3.65E-207	-0.509125006	0.856	0.876	7.30E-204	1	FBgn0086254
FBgn0267505	5.63E-207	0.391026981	0.929	0.862	1.13E-203	1	FBgn0267505
FBgn0027598.1	1.23E-205	-0.552214894	0.57	0.715	2.45E-202	1	FBgn0027598
FBgn0039101	8.11E-205	0.268394083	0.731	0.722	1.62E-201	1	FBgn0039101
FBgn0259228.1	9.78E-205	0.353707076	0.914	0.864	1.96E-201	1	FBgn0259228
FBgn0266758.1	4.38E-204	0.338865431	0.957	0.905	8.77E-201	1	FBgn0266758
FBgn0036007	4.40E-200	-0.321812449	0.789	0.858	8.80E-197	1	FBgn0036007
FBgn0010397.1	1.54E-197	0.251993896	0.946	0.891	3.08E-194	1	FBgn0010397
FBgn0038476.1	6.77E-195	-0.414425613	0.632	0.713	1.35E-191	1	FBgn0038476
FBgn0004647	2.35E-194	-0.68387661	0.733	0.735	4.71E-191	1	FBgn0004647
FBgn0025628.1	9.84E-194	-0.492303549	0.66	0.76	1.97E-190	1	FBgn0025628
FBgn0003053.1	4.84E-193	-0.330176939	0.661	0.723	9.69E-190	1	FBgn0003053
FBgn0051769.1	2.76E-192	-0.49530464	0.86	0.916	5.52E-189	1	FBgn0051769
FBgn0025682.1	3.17E-192	-0.562552684	0.824	0.878	6.34E-189	1	FBgn0025682
FBgn0264815.1	4.07E-190	-0.568847172	0.594	0.717	8.14E-187	1	FBgn0264815
FBgn0051337.1	1.05E-189	-0.535739246	0.481	0.66	2.10E-186	1	FBgn0051337
FBgn0033928	2.01E-185	0.292141287	0.87	0.848	4.03E-182	1	FBgn0033928
FBgn0033649.1	5.85E-185	0.35736126	0.772	0.737	1.17E-181	1	FBgn0033649
FBgn0036752.1	7.33E-185	0.334367502	0.899	0.842	1.47E-181	1	FBgn0036752
FBgn0000044	4.87E-184	-0.364596076	0.836	0.863	9.74E-181	1	FBgn0000044
FBgn0035173	1.14E-183	-0.293589896	0.601	0.659	2.29E-180	1	FBgn0035173
FBgn0069923	2.38E-183	0.279545283	0.9	0.82	4.76E-180	1	FBgn0069923
FBgn0265048.1	4.70E-182	-0.516137712	0.698	0.786	9.40E-179	1	FBgn0265048
FBgn0000719.1	2.44E-181	-0.284067566	0.731	0.758	4.89E-178	1	FBgn0000719
FBgn0034139.1	4.01E-181	-0.477697328	0.78	0.829	8.03E-178	1	FBgn0034139
FBgn0035964.1	3.63E-178	-0.407959986	0.749	0.859	7.27E-175	1	FBgn0035964
FBgn0032036	1.09E-177	-0.395348672	0.727	0.869	2.19E-174	1	FBgn0032036
FBgn0019952.1	1.32E-177	-0.271169847	0.611	0.742	2.63E-174	1	FBgn0019952
FBgn0030608	7.28E-177	-0.313399671	0.73	0.781	1.46E-173	1	FBgn0030608
FBgn0031805.1	1.10E-173	-0.284884797	0.739	0.752	2.20E-170	1	FBgn0031805
FBgn0085442.1	4.57E-173	0.319846571	0.882	0.815	9.14E-170	1	FBgn0085442
FBgn0031914.1	9.57E-173	-0.380099436	0.433	0.602	1.91E-169	1	FBgn0031914
FBgn0014388.1	1.30E-172	-0.658856826	0.853	0.906	2.60E-169	1	FBgn0014388
FBgn0030400.1	5.15E-172	0.385111489	0.849	0.788	1.03E-168	1	FBgn0030400
FBgn0000318.1	2.68E-171	0.283260544	0.973	0.953	5.37E-168	1	FBgn0000318
FBgn0261444.1	4.48E-170	-0.330257539	0.641	0.72	8.95E-167	1	FBgn0261444
FBgn0033309.1	3.76E-169	0.358661545	0.84	0.752	7.52E-166	1	FBgn0033309
FBgn0027657.1	1.54E-167	-0.48732749	0.735	0.837	3.08E-164	1	FBgn0027657
FBgn0045842.1	3.02E-167	0.268084863	0.824	0.739	6.04E-164	1	FBgn0045842
FBgn0033756.1	5.10E-167	0.298776602	0.93	0.864	1.02E-163	1	FBgn0033756
FBgn0010225.1	1.88E-166	-0.47398988	0.655	0.733	3.76E-163	1	FBgn0010225
FBgn0034753.1	4.04E-166	-0.437875256	0.96	0.964	8.07E-163	1	FBgn0034753
FBgn0031307.1	1.74E-165	-0.648630973	0.832	0.838	3.47E-162	1	FBgn0031307
FBgn0040395	6.44E-163	-0.303517561	0.592	0.746	1.29E-159	1	FBgn0040395
FBgn0263930.1	1.26E-162	-0.310074543	0.637	0.824	2.51E-159	1	FBgn0263930
FBgn0030241.1	1.08E-161	-0.361098185	0.752	0.809	2.17E-158	1	FBgn0030241
FBgn0259977.1	3.12E-159	0.259001095	0.78	0.73	6.23E-156	1	FBgn0259977
FBgn0024227.1	9.65E-158	-0.334709054	0.764	0.805	1.93E-154	1	FBgn0024227
FBgn0014865	1.19E-154	-0.393949594	0.784	0.816	2.38E-151	1	FBgn0014865
FBgn0010238.1	1.30E-154	-0.332080104	0.783	0.827	2.60E-151	1	FBgn0010238
FBgn0085452.1	1.30E-154	-0.681668081	0.853	0.89	2.60E-151	1	FBgn0085452
FBgn0035209.1	3.11E-154	-0.261599231	0.798	0.799	6.22E-151	1	FBgn0035209
FBgn0040102.1	4.67E-154	-0.387380109	0.468	0.627	9.34E-151	1	FBgn0040102
FBgn0003660.1	8.19E-151	0.26379574	0.988	0.966	1.64E-147	1	FBgn0003660
FBgn0052066.1	3.34E-150	0.295325486	0.914	0.857	6.68E-147	1	FBgn0052066
FBgn0038826.1	2.20E-149	-0.402899403	0.732	0.803	4.41E-146	1	FBgn0038826
FBgn0020249.1	6.10E-148	0.312877686	0.872	0.819	1.22E-144	1	FBgn0020249
FBgn0003495.1	3.12E-147	-0.588218745	0.88	0.913	6.24E-144	1	FBgn0003495
FBgn0250785	3.84E-141	-0.25829764	0.666	0.789	7.67E-138	1	FBgn0250785
FBgn0020414.1	6.93E-140	-0.421925362	0.793	0.815	1.39E-136	1	FBgn0020414
FBgn0034638.1	1.91E-139	-0.45486505	0.821	0.863	3.82E-136	1	FBgn0034638
FBgn0016059	5.14E-138	-0.314418065	0.64	0.772	1.03E-134	1	FBgn0016059
FBgn0010909.1	8.26E-138	0.327075875	0.921	0.833	1.65E-134	1	FBgn0010909
FBgn0024150.1	1.07E-137	0.330645648	0.835	0.792	2.15E-134	1	FBgn0024150
FBgn0010415	4.07E-137	-0.271862409	0.543	0.632	8.13E-134	1	FBgn0010415
FBgn0243516	9.16E-135	-0.296604556	0.689	0.804	1.83E-131	1	FBgn0243516
FBgn0041180	3.01E-134	-0.320423276	0.845	0.908	6.02E-131	1	FBgn0041180
FBgn0029881	1.37E-133	-0.306328038	0.61	0.651	2.75E-130	1	FBgn0029881
FBgn0036896	2.44E-133	0.33161219	0.644	0.529	4.89E-130	1	FBgn0036896
FBgn0267252.1	1.21E-132	-0.468181989	0.749	0.876	2.43E-129	1	FBgn0267252
FBgn0002733	1.41E-132	-0.367286749	0.678	0.723	2.82E-129	1	FBgn0002733
FBgn0017581	1.32E-129	-0.478173101	0.821	0.832	2.65E-126	1	FBgn0017581
FBgn0250906	1.63E-128	-0.342890164	0.819	0.843	3.25E-125	1	FBgn0250906
FBgn0033438	2.58E-128	-0.402149104	0.737	0.833	5.17E-125	1	FBgn0033438
FBgn0052672.1	6.87E-126	-0.479616548	0.873	0.906	1.37E-122	1	FBgn0052672
FBgn0030048.1	6.85E-122	0.35924963	0.775	0.76	1.37E-118	1	FBgn0030048
FBgn0000256.1	1.30E-120	0.268433398	0.855	0.796	2.61E-117	1	FBgn0000256
FBgn0041585.1	5.01E-120	0.284300183	0.813	0.736	1.00E-116	1	FBgn0041585
FBgn0035049.1	8.38E-120	-0.514599384	0.654	0.762	1.68E-116	1	FBgn0035049
FBgn0052594	1.68E-117	-0.332177685	0.544	0.662	3.35E-114	1	FBgn0052594
FBgn0003124.1	4.69E-116	-0.268194219	0.614	0.661	9.37E-113	1	FBgn0003124
FBgn0261385.1	1.11E-114	-0.386903273	0.691	0.73	2.22E-111	1	FBgn0261385
FBgn0050463.1	5.18E-114	-0.301163078	0.587	0.651	1.04E-110	1	FBgn0050463
FBgn0004629.1	3.85E-113	-0.383973132	0.698	0.719	7.70E-110	1	FBgn0004629
FBgn0032318.1	2.33E-112	-0.844867747	0.848	0.878	4.66E-109	1	FBgn0032318
FBgn0028936	5.48E-112	-0.272950061	0.851	0.889	1.10E-108	1	FBgn0028936
FBgn0037913	6.71E-112	0.286648754	0.944	0.853	1.34E-108	1	FBgn0037913
FBgn0029131.1	1.51E-111	0.254232043	0.872	0.845	3.02E-108	1	FBgn0029131
FBgn0032897.1	2.29E-111	-0.804609069	0.836	0.895	4.57E-108	1	FBgn0032897
FBgn0036770	9.52E-111	-0.267062917	0.532	0.61	1.90E-107	1	FBgn0036770
FBgn0028984.1	1.24E-110	-0.392693366	0.798	0.875	2.48E-107	1	FBgn0028984
FBgn0035432.1	2.99E-110	0.258311181	0.914	0.864	5.97E-107	1	FBgn0035432
FBgn0261556.1	1.53E-108	-0.318845866	0.546	0.673	3.05E-105	1	FBgn0261556
FBgn0010039	2.95E-108	-0.264580459	0.885	0.918	5.91E-105	1	FBgn0010039
FBgn0001987.1	1.21E-105	-0.470289157	0.658	0.797	2.42E-102	1	FBgn0001987
FBgn0085466.1	1.35E-105	-0.486259877	0.887	0.918	2.70E-102	1	FBgn0085466
FBgn0086356.1	1.05E-103	-0.294945058	0.768	0.768	2.11E-100	1	FBgn0086356
FBgn0027509	9.28E-103	0.260101709	0.781	0.728	1.86E-99	1	FBgn0027509
FBgn0030521.1	7.34E-101	-0.356741766	0.858	0.888	1.47E-97	1	FBgn0030521
FBgn0030160.1	3.03E-99	-0.282563794	0.822	0.851	6.06E-96	1	FBgn0030160
FBgn0038243.1	2.21E-98	-0.346988345	0.71	0.791	4.43E-95	1	FBgn0038243
FBgn0261260.1	1.21E-97	-0.580766187	0.741	0.807	2.43E-94	1	FBgn0261260
FBgn0031213.1	4.32E-97	-0.471720909	0.79	0.862	8.64E-94	1	FBgn0031213
FBgn0053111.1	1.92E-93	0.266999922	0.745	0.696	3.85E-90	1	FBgn0053111
FBgn0036663.1	5.22E-92	0.274136068	0.784	0.758	1.04E-88	1	FBgn0036663
FBgn0019661.1	1.52E-89	-0.356331133	0.869	0.897	3.03E-86	1	FBgn0019661
FBgn0085360.1	1.02E-88	-0.271341832	0.38	0.55	2.03E-85	1	FBgn0085360
FBgn0034985.1	4.89E-88	-0.366000029	0.713	0.729	9.77E-85	1	FBgn0034985
FBgn0001248.1	6.97E-88	-0.339805511	0.657	0.698	1.39E-84	1	FBgn0001248
FBgn0005278.1	1.50E-86	-0.26483532	0.809	0.846	2.99E-83	1	FBgn0005278
FBgn0010300.1	6.56E-85	-0.25317578	0.764	0.762	1.31E-81	1	FBgn0010300
FBgn0004378.1	6.59E-85	-0.299300078	0.671	0.686	1.32E-81	1	FBgn0004378
FBgn0040299.1	1.95E-81	0.294869265	0.75	0.756	3.90E-78	1	FBgn0040299
FBgn0001091.1	1.51E-80	-0.480175443	0.87	0.885	3.02E-77	1	FBgn0001091
FBgn0025885.1	3.35E-77	-0.433854986	0.903	0.878	6.71E-74	1	FBgn0025885
FBgn0010424.1	3.84E-75	-1.116516786	0.85	0.887	7.67E-72	1	FBgn0010424
FBgn0016672.1	5.91E-68	-0.426408614	0.764	0.835	1.18E-64	1	FBgn0016672
FBgn0266521	6.31E-68	-0.324561739	0.712	0.669	1.26E-64	1	FBgn0266521
FBgn0085359.1	4.48E-66	-0.624402746	0.795	0.865	8.97E-63	1	FBgn0085359
FBgn0026189.1	1.12E-65	-0.341210994	0.854	0.929	2.24E-62	1	FBgn0026189
FBgn0000250	4.42E-65	-0.271426331	0.796	0.806	8.83E-62	1	FBgn0000250
FBgn0030412.1	1.42E-63	-0.405145478	0.651	0.737	2.83E-60	1	FBgn0030412
FBgn0031190	6.99E-62	-0.25444996	0.715	0.718	1.40E-58	1	FBgn0031190
FBgn0020251.1	6.41E-61	-0.446976833	0.738	0.765	1.28E-57	1	FBgn0020251
FBgn0086558	8.34E-61	-0.263477976	0.856	0.886	1.67E-57	1	FBgn0086558
FBgn0020304.1	8.68E-61	-0.347179703	0.669	0.749	1.74E-57	1	FBgn0020304
FBgn0264894.1	1.15E-60	-0.389590503	0.795	0.769	2.30E-57	1	FBgn0264894
FBgn0259715	1.60E-59	-0.258421586	0.482	0.545	3.19E-56	1	FBgn0259715
FBgn0030520	3.28E-57	-0.306683215	0.637	0.637	6.57E-54	1	FBgn0030520
FBgn0052407	9.09E-57	0.255821711	0.67	0.707	1.82E-53	1	FBgn0052407
FBgn0034405	2.49E-55	-0.270578057	0.65	0.646	4.98E-52	1	FBgn0034405
FBgn0283437.1	5.51E-55	-1.655933999	0.786	0.819	1.10E-51	1	FBgn0283437
FBgn0038679.1	6.90E-55	-0.357802233	0.712	0.828	1.38E-51	1	FBgn0038679
FBgn0000261	3.50E-52	-0.260728534	0.7	0.72	6.99E-49	1	FBgn0000261
FBgn0085354.1	7.22E-52	-0.364767229	0.794	0.841	1.44E-48	1	FBgn0085354
FBgn0047178.1	5.18E-49	-0.380189565	0.741	0.778	1.04E-45	1	FBgn0047178
FBgn0038353.1	5.26E-48	-0.333206548	0.62	0.605	1.05E-44	1	FBgn0038353
FBgn0030993.1	2.51E-46	-0.3723221	0.78	0.8	5.02E-43	1	FBgn0030993
FBgn0001089	4.83E-46	-0.272589068	0.383	0.514	9.66E-43	1	FBgn0001089
FBgn0038037	9.09E-43	-0.320261408	0.733	0.724	1.82E-39	1	FBgn0038037
FBgn0033367	4.75E-42	-1.613734669	0.894	0.897	9.50E-39	1	FBgn0033367
FBgn0250837.1	2.01E-40	-0.346513259	0.877	0.885	4.03E-37	1	FBgn0250837
FBgn0003074	5.36E-39	-0.295259016	0.792	0.787	1.07E-35	1	FBgn0003074
FBgn0085423	1.27E-38	0.262275562	0.61	0.598	2.54E-35	1	FBgn0085423
FBgn0001092.1	2.03E-38	-0.264162908	0.977	0.942	4.07E-35	1	FBgn0001092
FBgn0010228.1	2.92E-38	-0.367867086	0.917	0.917	5.85E-35	1	FBgn0010228
FBgn0034720.1	6.08E-38	-0.297852754	0.702	0.789	1.22E-34	1	FBgn0034720
FBgn0030234.1	5.96E-36	-0.262223979	0.869	0.871	1.19E-32	1	FBgn0030234
FBgn0261244.1	6.06E-35	-0.28631529	0.765	0.823	1.21E-31	1	FBgn0261244
FBgn0000579.1	9.98E-35	-0.298829935	0.965	0.95	2.00E-31	1	FBgn0000579
FBgn0034443.1	1.38E-28	-0.521644291	0.941	0.933	2.77E-25	1	FBgn0034443
FBgn0032010.1	1.54E-27	-0.288088275	0.688	0.777	3.07E-24	1	FBgn0032010
FBgn0051075.1	1.65E-26	-0.319822694	0.842	0.805	3.30E-23	1	FBgn0051075
FBgn0052446	4.44E-26	-0.250657755	0.772	0.78	8.89E-23	1	FBgn0052446
FBgn0029932.1	1.66E-25	-0.863246516	0.865	0.899	3.32E-22	1	FBgn0029932
FBgn0266253.1	6.71E-25	-0.488752042	0.946	0.96	1.34E-21	1	FBgn0266253
FBgn0259740.1	1.32E-24	-0.484595973	0.993	0.989	2.65E-21	1	FBgn0259740
FBgn0040383	4.63E-24	-0.254572599	0.748	0.667	9.25E-21	1	FBgn0040383
FBgn0265991.1	1.38E-23	-0.290629338	0.777	0.8	2.75E-20	1	FBgn0265991
FBgn0263380.1	3.54E-23	-0.551486953	0.848	0.887	7.09E-20	1	FBgn0263380
FBgn0040296.1	4.04E-22	-0.573823981	0.741	0.792	8.08E-19	1	FBgn0040296
FBgn0262563.1	2.09E-21	-0.287594476	0.809	0.837	4.17E-18	1	FBgn0262563
FBgn0266420.1	7.33E-21	-0.261902621	0.776	0.766	1.47E-17	1	FBgn0266420
FBgn0035679.1	6.75E-20	-0.479713646	0.655	0.687	1.35E-16	1	FBgn0035679
FBgn0266417.1	3.08E-19	-0.285074668	0.728	0.757	6.17E-16	1	FBgn0266417
FBgn0038250.1	5.43E-18	-0.303389537	0.773	0.757	1.09E-14	1	FBgn0038250
FBgn0031791.1	5.78E-18	-0.723436237	0.839	0.887	1.16E-14	1	FBgn0031791
FBgn0028490.1	1.59E-17	-0.350553819	0.835	0.806	3.18E-14	1	FBgn0028490
FBgn0011770	1.75E-16	-0.32253041	0.778	0.748	3.49E-13	1	FBgn0011770
FBgn0032400.1	4.28E-16	-0.264943547	0.878	0.824	8.55E-13	1	FBgn0032400
FBgn0031080.1	5.93E-16	-0.324993267	0.717	0.805	1.19E-12	1	FBgn0031080
FBgn0039747.1	3.98E-14	-0.493668299	0.753	0.775	7.96E-11	1	FBgn0039747
FBgn0031150.1	6.57E-14	-0.332778318	0.711	0.784	1.31E-10	1	FBgn0031150
FBgn0053225.1	5.32E-13	-0.335774062	0.961	0.95	1.06E-09	1	FBgn0053225
FBgn0019968.1	2.35E-12	-0.252248159	0.713	0.74	4.70E-09	1	FBgn0019968
FBgn0051363.1	3.93E-12	-0.407833429	0.991	0.992	7.86E-09	1	FBgn0051363
FBgn0050460.1	1.08E-11	-0.32770142	0.823	0.801	2.16E-08	1	FBgn0050460
FBgn0015229.1	8.35E-11	-0.317048835	0.671	0.661	1.67E-07	1	FBgn0015229
FBgn0267033	3.81E-07	-0.25063249	0.736	0.695	0.000761948	1	FBgn0267033
FBgn0003447.1	4.05E-07	-0.32735249	0.721	0.74	0.000809196	1	FBgn0003447
FBgn0035189.1	7.01E-07	-0.323968303	0.564	0.589	0.001402991	1	FBgn0035189
FBgn0014869.1	5.69E-06	-0.298639753	0.843	0.856	0.011388403	1	FBgn0014869
FBgn0030653.1	2.31E-05	-0.381694688	0.558	0.492	0.046284426	1	FBgn0030653
FBgn0039759.1	0.00019341	-0.253845431	0.835	0.876	0.386820092	1	FBgn0039759
FBgn0036341.1	0.000598521	-0.272179813	0.818	0.797	1	1	FBgn0036341
FBgn0043070.1	0.000760777	-0.291334056	0.892	0.875	1	1	FBgn0043070
FBgn0042135.1	0.008420706	-0.328766656	0.788	0.825	1	1	FBgn0042135
FBgn0010424.2	0	2.156913969	0.975	0.855	0	2	FBgn0010424
FBgn0029932.2	0	1.972929379	0.991	0.867	0	2	FBgn0029932
FBgn0037386.1	0	1.933085866	1	0.98	0	2	FBgn0037386
FBgn0263380.2	0	1.86955979	0.986	0.852	0	2	FBgn0263380
FBgn0266253.2	0	1.861053238	0.998	0.946	0	2	FBgn0266253
FBgn0032318.2	0	1.848139264	0.932	0.857	0	2	FBgn0032318
FBgn0038682.1	0	1.828288846	0.995	0.883	0	2	FBgn0038682
FBgn0013733.1	0	1.818767333	1	0.908	0	2	FBgn0013733
FBgn0032897.2	0	1.816493672	0.966	0.861	0	2	FBgn0032897
FBgn0085359.2	0	1.76088548	0.972	0.819	0	2	FBgn0085359
FBgn0015872.1	0	1.740411121	0.997	0.835	0	2	FBgn0015872
FBgn0026084.1	0	1.703191468	1	0.987	0	2	FBgn0026084
FBgn0031791.2	0	1.690919857	0.99	0.848	0	2	FBgn0031791
FBgn0053225.2	0	1.681635426	0.997	0.941	0	2	FBgn0053225
FBgn0030040.2	0	1.655996337	1	0.982	0	2	FBgn0030040
FBgn0034005.1	0	1.614825949	0.994	0.848	0	2	FBgn0034005
FBgn0003888.2	0	1.597243694	1	0.988	0	2	FBgn0003888
FBgn0001092.2	0	1.585744582	0.999	0.937	0	2	FBgn0001092
FBgn0037477.1	0	1.575187238	0.995	0.892	0	2	FBgn0037477
FBgn0035498.1	0	1.558762077	0.999	0.937	0	2	FBgn0035498
FBgn0032422.2	0	1.556126912	1	0.976	0	2	FBgn0032422
FBgn0003886.1	0	1.525077113	1	0.999	0	2	FBgn0003886
FBgn0032886.1	0	1.506568039	0.989	0.857	0	2	FBgn0032886
FBgn0040296.2	0	1.488854902	0.899	0.751	0	2	FBgn0040296
FBgn0030396.2	0	1.465540766	0.999	0.891	0	2	FBgn0030396
FBgn0029903.1	0	1.462954841	0.997	0.849	0	2	FBgn0029903
FBgn0265413.2	0	1.449466981	0.996	0.918	0	2	FBgn0265413
FBgn0032400.2	0	1.449180108	0.985	0.798	0	2	FBgn0032400
FBgn0261561.1	0	1.444573944	0.974	0.791	0	2	FBgn0261561
FBgn0029507.2	0	1.440964742	0.995	0.922	0	2	FBgn0029507
FBgn0034443.2	0	1.437718497	0.997	0.92	0	2	FBgn0034443
FBgn0261363.2	0	1.428119265	0.997	0.95	0	2	FBgn0261363
FBgn0261260.2	0	1.426189942	0.976	0.747	0	2	FBgn0261260
FBgn0028916.1	0	1.411383596	0.979	0.828	0	2	FBgn0028916
FBgn0042135.2	0	1.404912118	0.981	0.776	0	2	FBgn0042135
FBgn0001258.1	0	1.395869155	0.976	0.849	0	2	FBgn0001258
FBgn0051363.2	0	1.391075723	1	0.989	0	2	FBgn0051363
FBgn0051729.1	0	1.384352384	0.997	0.867	0	2	FBgn0051729
FBgn0033504.2	0	1.381591079	0.985	0.829	0	2	FBgn0033504
FBgn0036742.1	0	1.376156935	0.985	0.84	0	2	FBgn0036742
FBgn0039747.2	0	1.366760753	0.949	0.726	0	2	FBgn0039747
FBgn0085452.2	0	1.357961142	0.98	0.857	0	2	FBgn0085452
FBgn0038088.2	0	1.347668525	0.974	0.799	0	2	FBgn0038088
FBgn0264895.1	0	1.344380607	0.998	0.949	0	2	FBgn0264895
FBgn0033033.1	0	1.344063782	0.961	0.753	0	2	FBgn0033033
FBgn0003447.2	0	1.330233093	0.96	0.679	0	2	FBgn0003447
FBgn0003890.1	0	1.323494476	0.995	0.869	0	2	FBgn0003890
FBgn0031307.2	0	1.306703581	0.969	0.804	0	2	FBgn0031307
FBgn0031080.2	0	1.306225272	0.925	0.752	0	2	FBgn0031080
FBgn0027066.1	0	1.300745583	0.998	0.944	0	2	FBgn0027066
FBgn0035708.1	0	1.296824126	0.983	0.78	0	2	FBgn0035708
FBgn0026602.1	0	1.291363467	0.974	0.789	0	2	FBgn0026602
FBgn0260442.1	0	1.27689244	0.999	0.945	0	2	FBgn0260442
FBgn0043070.2	0	1.273140447	0.993	0.85	0	2	FBgn0043070
FBgn0001987.2	0	1.269719484	0.95	0.722	0	2	FBgn0001987
FBgn0053056.1	0	1.252185556	0.953	0.719	0	2	FBgn0053056
FBgn0022709.1	0	1.247167144	0.964	0.767	0	2	FBgn0022709
FBgn0003218.2	0	1.233985639	0.981	0.859	0	2	FBgn0003218
FBgn0038679.2	0	1.225044847	0.965	0.764	0	2	FBgn0038679
FBgn0004657.1	0	1.224687321	0.999	0.963	0	2	FBgn0004657
FBgn0031213.2	0	1.223075705	0.963	0.818	0	2	FBgn0031213
FBgn0031150.2	0	1.206837667	0.95	0.723	0	2	FBgn0031150
FBgn0016672.2	0	1.197116369	0.937	0.791	0	2	FBgn0016672
FBgn0004636.1	0	1.193189604	1	0.979	0	2	FBgn0004636
FBgn0086347.1	0	1.19280586	0.999	0.94	0	2	FBgn0086347
FBgn0015589.1	0	1.191426322	0.965	0.781	0	2	FBgn0015589
FBgn0027657.2	0	1.191364012	0.942	0.784	0	2	FBgn0027657
FBgn0038149.1	0	1.18958516	0.98	0.74	0	2	FBgn0038149
FBgn0004456.1	0	1.184234388	0.986	0.878	0	2	FBgn0004456
FBgn0040551.1	0	1.182602652	0.966	0.74	0	2	FBgn0040551
FBgn0014141.2	0	1.167721194	1	0.965	0	2	FBgn0014141
FBgn0030412.2	0	1.165569152	0.936	0.664	0	2	FBgn0030412
FBgn0004397.1	0	1.165163734	0.972	0.79	0	2	FBgn0004397
FBgn0034219.2	0	1.153840304	0.997	0.915	0	2	FBgn0034219
FBgn0020251.2	0	1.153013898	0.917	0.72	0	2	FBgn0020251
FBgn0261261.1	0	1.149670872	0.924	0.777	0	2	FBgn0261261
FBgn0086355.1	0	1.136555232	0.973	0.825	0	2	FBgn0086355
FBgn0032140.1	0	1.131725576	0.998	0.898	0	2	FBgn0032140
FBgn0034638.2	0	1.123720251	0.971	0.825	0	2	FBgn0034638
FBgn0033032.1	0	1.091032459	0.974	0.827	0	2	FBgn0033032
FBgn0265991.2	0	1.083295621	0.963	0.754	0	2	FBgn0265991
FBgn0050035.2	0	1.082506096	0.965	0.836	0	2	FBgn0050035
FBgn0266417.2	0	1.069463545	0.969	0.696	0	2	FBgn0266417
FBgn0024238.2	0	1.069163796	0.993	0.902	0	2	FBgn0024238
FBgn0035964.2	0	1.064847334	0.954	0.806	0	2	FBgn0035964
FBgn0041087.1	0	1.063837318	0.989	0.926	0	2	FBgn0041087
FBgn0015229.2	0	1.060279618	0.898	0.604	0	2	FBgn0015229
FBgn0085354.2	0	1.057960255	0.946	0.802	0	2	FBgn0085354
FBgn0028984.2	0	1.057323672	0.979	0.829	0	2	FBgn0028984
FBgn0019968.2	0	1.056154363	0.931	0.684	0	2	FBgn0019968
FBgn0010397.2	0	1.052658052	0.996	0.879	0	2	FBgn0010397
FBgn0020304.2	0	1.04906757	0.943	0.679	0	2	FBgn0020304
FBgn0047178.2	0	1.040901799	0.968	0.72	0	2	FBgn0047178
FBgn0028490.2	0	1.036998526	0.975	0.771	0	2	FBgn0028490
FBgn0051769.2	0	1.031786815	0.982	0.884	0	2	FBgn0051769
FBgn0038206.2	0	1.019392137	0.989	0.838	0	2	FBgn0038206
FBgn0034894.1	0	1.019063203	0.979	0.791	0	2	FBgn0034894
FBgn0033635.2	0	1.014849364	0.996	0.95	0	2	FBgn0033635
FBgn0000256.2	0	1.014802032	0.967	0.768	0	2	FBgn0000256
FBgn0033926.1	0	1.011714533	1	0.999	0	2	FBgn0033926
FBgn0014869.2	0	1.008208439	0.979	0.822	0	2	FBgn0014869
FBgn0025628.2	0	1.005055669	0.919	0.694	0	2	FBgn0025628
FBgn0032857.1	0	0.999305418	0.905	0.775	0	2	FBgn0032857
FBgn0001091.2	0	0.994360418	0.986	0.855	0	2	FBgn0001091
FBgn0053494.1	0	0.974475738	0.996	0.937	0	2	FBgn0053494
FBgn0031457.1	0	0.971532341	0.945	0.719	0	2	FBgn0031457
FBgn0052672.2	0	0.965118684	0.98	0.879	0	2	FBgn0052672
FBgn0263346.1	0	0.954560759	0.914	0.678	0	2	FBgn0263346
FBgn0261244.2	0	0.949720632	0.953	0.775	0	2	FBgn0261244
FBgn0028427.1	0	0.949274979	0.983	0.848	0	2	FBgn0028427
FBgn0026189.2	0	0.948569055	0.98	0.897	0	2	FBgn0026189
FBgn0283712.1	0	0.941773627	0.924	0.651	0	2	FBgn0283712
FBgn0015795.1	0	0.941320891	0.986	0.84	0	2	FBgn0015795
FBgn0036341.2	0	0.939224767	0.944	0.765	0	2	FBgn0036341
FBgn0026374.1	0	0.936581004	0.942	0.682	0	2	FBgn0026374
FBgn0036805.1	0	0.934021412	0.982	0.823	0	2	FBgn0036805
FBgn0033188.1	0	0.933586912	0.921	0.692	0	2	FBgn0033188
FBgn0014011.2	0	0.930007812	0.996	0.917	0	2	FBgn0014011
FBgn0000579.2	0	0.924272294	0.997	0.942	0	2	FBgn0000579
FBgn0262582.1	0	0.923290024	0.951	0.692	0	2	FBgn0262582
FBgn0262563.2	0	0.915625514	0.956	0.8	0	2	FBgn0262563
FBgn0015765.1	0	0.912956459	0.958	0.74	0	2	FBgn0015765
FBgn0032010.2	0	0.911636343	0.909	0.72	0	2	FBgn0032010
FBgn0034720.2	0	0.909475896	0.868	0.746	0	2	FBgn0034720
FBgn0035587.2	0	0.905721607	0.968	0.859	0	2	FBgn0035587
FBgn0029896.2	0	0.904881565	0.947	0.819	0	2	FBgn0029896
FBgn0037468.1	0	0.903465429	0.994	0.925	0	2	FBgn0037468
FBgn0003748.2	0	0.901234013	0.971	0.866	0	2	FBgn0003748
FBgn0032731.1	0	0.898616806	0.995	0.945	0	2	FBgn0032731
FBgn0264693.1	0	0.897378589	0.963	0.819	0	2	FBgn0264693
FBgn0001105.1	0	0.891039203	0.999	0.978	0	2	FBgn0001105
FBgn0000042.2	0	0.882304971	1	1	0	2	FBgn0000042
FBgn0001149.2	0	0.88170473	1	0.98	0	2	FBgn0001149
FBgn0000083.1	0	0.881662737	1	0.992	0	2	FBgn0000083
FBgn0003206.1	0	0.877909751	0.946	0.651	0	2	FBgn0003206
FBgn0050460.2	0	0.876590462	0.943	0.771	0	2	FBgn0050460
FBgn0036752.2	0	0.874358488	0.968	0.825	0	2	FBgn0036752
FBgn0036877.1	0	0.871038317	0.892	0.649	0	2	FBgn0036877
FBgn0032191.1	0	0.870186838	0.97	0.835	0	2	FBgn0032191
FBgn0259228.2	0	0.867472661	0.97	0.851	0	2	FBgn0259228
FBgn0259243.1	0	0.865235524	0.927	0.746	0	2	FBgn0259243
FBgn0002868.2	0	0.86313646	1	0.994	0	2	FBgn0002868
FBgn0264894.2	0	0.860156402	0.919	0.739	0	2	FBgn0264894
FBgn0014009.1	0	0.842855261	0.97	0.829	0	2	FBgn0014009
FBgn0041789.1	0	0.841954871	0.987	0.882	0	2	FBgn0041789
FBgn0000253.2	0	0.840972203	1	1	0	2	FBgn0000253
FBgn0024150.2	0	0.838868941	0.947	0.765	0	2	FBgn0024150
FBgn0028546.1	0	0.831544091	0.98	0.831	0	2	FBgn0028546
FBgn0010238.2	0	0.828528664	0.944	0.786	0	2	FBgn0010238
FBgn0030670.1	0	0.828298927	0.947	0.75	0	2	FBgn0030670
FBgn0040206.1	0	0.819890138	0.965	0.819	0	2	FBgn0040206
FBgn0014029.1	0	0.817678406	0.981	0.839	0	2	FBgn0014029
FBgn0261458.1	0	0.811547552	0.999	0.963	0	2	FBgn0261458
FBgn0259977.2	0	0.806997944	0.904	0.7	0	2	FBgn0259977
FBgn0037720.2	0	0.802331495	0.952	0.738	0	2	FBgn0037720
FBgn0037956.1	0	0.801866944	0.898	0.584	0	2	FBgn0037956
FBgn0027580.1	0	0.796060575	0.951	0.822	0	2	FBgn0027580
FBgn0263930.2	0	0.794320643	0.9	0.756	0	2	FBgn0263930
FBgn0000318.2	0	0.789279219	0.995	0.948	0	2	FBgn0000318
FBgn0029095.1	0	0.784477158	0.985	0.888	0	2	FBgn0029095
FBgn0010395.1	0	0.783826678	0.935	0.762	0	2	FBgn0010395
FBgn0031090.1	0	0.781323016	0.978	0.869	0	2	FBgn0031090
FBgn0012051.1	0	0.780544338	0.959	0.792	0	2	FBgn0012051
FBgn0031037.1	0	0.780412474	0.944	0.733	0	2	FBgn0031037
FBgn0038243.2	0	0.776778059	0.957	0.728	0	2	FBgn0038243
FBgn0017581.1	0	0.776465903	0.943	0.801	0	2	FBgn0017581
FBgn0040285.1	0	0.772761063	0.99	0.931	0	2	FBgn0040285
FBgn0010246.1	0	0.772166555	0.997	0.959	0	2	FBgn0010246
FBgn0266186.1	0	0.770745445	0.987	0.906	0	2	FBgn0266186
FBgn0261565.1	0	0.769129665	0.853	0.688	0	2	FBgn0261565
FBgn0037063.2	0	0.762848933	0.959	0.844	0	2	FBgn0037063
FBgn0266719.1	0	0.758235418	0.908	0.702	0	2	FBgn0266719
FBgn0003205.1	0	0.741587653	0.985	0.881	0	2	FBgn0003205
FBgn0001961.1	0	0.733581098	0.993	0.944	0	2	FBgn0001961
FBgn0010406.1	0	0.730468759	0.93	0.723	0	2	FBgn0010406
FBgn0262160.2	0	0.721931475	0.963	0.775	0	2	FBgn0262160
FBgn0000723.1	0	0.71843156	0.961	0.823	0	2	FBgn0000723
FBgn0265191.2	0	0.713245401	0.895	0.673	0	2	FBgn0265191
FBgn0261545.1	0	0.712700247	0.869	0.576	0	2	FBgn0261545
FBgn0032499.1	0	0.709956563	0.9	0.739	0	2	FBgn0032499
FBgn0267487.1	0	0.709383829	0.929	0.763	0	2	FBgn0267487
FBgn0034200.1	0	0.708059849	0.934	0.793	0	2	FBgn0034200
FBgn0033906.1	0	0.705019669	0.984	0.891	0	2	FBgn0033906
FBgn0003514.1	0	0.703612513	0.995	0.935	0	2	FBgn0003514
FBgn0267849.1	0	0.702716793	0.938	0.717	0	2	FBgn0267849
FBgn0264087.1	0	0.702389936	0.885	0.746	0	2	FBgn0264087
FBgn0037465.1	0	0.693133686	0.931	0.644	0	2	FBgn0037465
FBgn0284257.1	0	0.69063885	0.966	0.806	0	2	FBgn0284257
FBgn0036298.1	0	0.689337721	0.964	0.719	0	2	FBgn0036298
FBgn0033756.2	0	0.689307423	0.981	0.852	0	2	FBgn0033756
FBgn0002645.1	0	0.687964028	0.97	0.842	0	2	FBgn0002645
FBgn0000636.1	0	0.686026575	0.862	0.68	0	2	FBgn0000636
FBgn0259923.1	0	0.685693745	0.927	0.731	0	2	FBgn0259923
FBgn0267910.1	0	0.684672624	1	1	0	2	FBgn0267910
FBgn0032036.1	0	0.683452691	0.954	0.811	0	2	FBgn0032036
FBgn0040299.2	0	0.683315961	0.907	0.716	0	2	FBgn0040299
FBgn0003074.1	0	0.682936101	0.936	0.75	0	2	FBgn0003074
FBgn0029131.2	0	0.682727245	0.969	0.821	0	2	FBgn0029131
FBgn0052528.1	0	0.681929439	0.931	0.736	0	2	FBgn0052528
FBgn0037387.1	0	0.672436306	0.833	0.682	0	2	FBgn0037387
FBgn0014133.1	0	0.670643078	0.982	0.903	0	2	FBgn0014133
FBgn0085442.2	0	0.663905964	0.953	0.798	0	2	FBgn0085442
FBgn0036663.2	0	0.663301518	0.903	0.728	0	2	FBgn0036663
FBgn0003093.2	0	0.663192	0.93	0.693	0	2	FBgn0003093
FBgn0003660.2	0	0.662845261	0.998	0.964	0	2	FBgn0003660
FBgn0039113.1	0	0.657255324	0.925	0.703	0	2	FBgn0039113
FBgn0086370.1	0	0.657218729	0.949	0.788	0	2	FBgn0086370
FBgn0041182.1	0	0.65533272	0.946	0.782	0	2	FBgn0041182
FBgn0266758.2	0	0.653976724	0.99	0.897	0	2	FBgn0266758
FBgn0036053.1	0	0.653246291	0.923	0.779	0	2	FBgn0036053
FBgn0030160.2	0	0.651844278	0.906	0.829	0	2	FBgn0030160
FBgn0000273.1	0	0.64249515	0.905	0.655	0	2	FBgn0000273
FBgn0039056.1	0	0.64212788	0.863	0.66	0	2	FBgn0039056
FBgn0039026.1	0	0.638598817	0.934	0.706	0	2	FBgn0039026
FBgn0020653.1	0	0.637443649	0.988	0.904	0	2	FBgn0020653
FBgn0000308.1	0	0.633681093	0.999	0.992	0	2	FBgn0000308
FBgn0035142	0	0.633249399	0.847	0.642	0	2	FBgn0035142
FBgn0052264.2	0	0.631340608	0.942	0.709	0	2	FBgn0052264
FBgn0016059.1	0	0.63127559	0.902	0.705	0	2	FBgn0016059
FBgn0030847.1	0	0.631168269	0.916	0.804	0	2	FBgn0030847
FBgn0052412.2	0	0.626283833	0.913	0.782	0	2	FBgn0052412
FBgn0033448.2	0	0.625075367	0.988	0.9	0	2	FBgn0033448
FBgn0020249.2	0	0.6232936	0.953	0.799	0	2	FBgn0020249
FBgn0037541.1	0	0.622673584	0.849	0.706	0	2	FBgn0037541
FBgn0035879.1	0	0.622337885	0.903	0.719	0	2	FBgn0035879
FBgn0035497.1	0	0.620633714	0.839	0.602	0	2	FBgn0035497
FBgn0038890.2	0	0.619066265	0.955	0.827	0	2	FBgn0038890
FBgn0032156.1	0	0.617141904	0.887	0.622	0	2	FBgn0032156
FBgn0001624.1	0	0.616859258	0.918	0.747	0	2	FBgn0001624
FBgn0004574.1	0	0.614034011	0.951	0.789	0	2	FBgn0004574
FBgn0263077.2	0	0.613238181	0.908	0.676	0	2	FBgn0263077
FBgn0011232.1	0	0.609873188	0.874	0.727	0	2	FBgn0011232
FBgn0038037.1	0	0.607100583	0.93	0.675	0	2	FBgn0038037
FBgn0261988.2	0	0.60686761	0.932	0.787	0	2	FBgn0261988
FBgn0000017.1	0	0.603237238	0.935	0.802	0	2	FBgn0000017
FBgn0028430.1	0	0.601739474	0.999	0.978	0	2	FBgn0028430
FBgn0001941.2	0	0.599934356	0.988	0.908	0	2	FBgn0001941
FBgn0267795.1	0	0.599891963	0.999	0.981	0	2	FBgn0267795
FBgn0020510.1	0	0.596981953	0.955	0.819	0	2	FBgn0020510
FBgn0041188.1	0	0.596511054	0.971	0.873	0	2	FBgn0041188
FBgn0026713	0	0.596411582	0.937	0.743	0	2	FBgn0026713
FBgn0051313.1	0	0.592996842	0.933	0.853	0	2	FBgn0051313
FBgn0266521.1	0	0.592813678	0.873	0.629	0	2	FBgn0266521
FBgn0029737	0	0.592293401	0.909	0.699	0	2	FBgn0029737
FBgn0036318.1	0	0.586442895	0.932	0.733	0	2	FBgn0036318
FBgn0039108.1	0	0.585745696	0.872	0.726	0	2	FBgn0039108
FBgn0040395.1	0	0.585262585	0.87	0.674	0	2	FBgn0040395
FBgn0259481.2	0	0.582800634	0.941	0.749	0	2	FBgn0259481
FBgn0265174.1	0	0.581781074	0.91	0.71	0	2	FBgn0265174
FBgn0259221.2	0	0.581119956	0.894	0.704	0	2	FBgn0259221
FBgn0031143.1	0	0.581001035	0.976	0.835	0	2	FBgn0031143
FBgn0037750.1	0	0.578819286	0.864	0.687	0	2	FBgn0037750
FBgn0035400.1	0	0.578789575	0.864	0.71	0	2	FBgn0035400
FBgn0250906.1	0	0.57520617	0.966	0.806	0	2	FBgn0250906
FBgn0010909.2	0	0.574695087	0.951	0.826	0	2	FBgn0010909
FBgn0050115.2	0	0.573442843	0.873	0.612	0	2	FBgn0050115
FBgn0262716.1	0	0.573292268	0.992	0.918	0	2	FBgn0262716
FBgn0086372.1	0	0.572818955	0.908	0.687	0	2	FBgn0086372
FBgn0035203.1	0	0.571838653	0.896	0.741	0	2	FBgn0035203
FBgn0030876	0	0.568315351	0.882	0.619	0	2	FBgn0030876
FBgn0051195	0	0.565187092	0.906	0.749	0	2	FBgn0051195
FBgn0052594.1	0	0.564870731	0.826	0.59	0	2	FBgn0052594
FBgn0053111.2	0	0.559247701	0.879	0.662	0	2	FBgn0053111
FBgn0004387.1	0	0.558702837	0.872	0.63	0	2	FBgn0004387
FBgn0030114	0	0.558068521	0.836	0.632	0	2	FBgn0030114
FBgn0010894	0	0.554398521	0.902	0.746	0	2	FBgn0010894
FBgn0025631	0	0.552338185	0.871	0.668	0	2	FBgn0025631
FBgn0036449	0	0.546053359	0.873	0.747	0	2	FBgn0036449
FBgn0033134	0	0.539357879	0.91	0.699	0	2	FBgn0033134
FBgn0040383.1	0	0.538167741	0.938	0.62	0	2	FBgn0040383
FBgn0003884.2	0	0.53755338	1	1	0	2	FBgn0003884
FBgn0030955	0	0.533218964	0.994	0.942	0	2	FBgn0030955
FBgn0036433	0	0.530213775	0.85	0.753	0	2	FBgn0036433
FBgn0028552	0	0.525915778	0.926	0.774	0	2	FBgn0028552
FBgn0037647	0	0.525363877	0.91	0.764	0	2	FBgn0037647
FBgn0031012	0	0.524541091	0.873	0.628	0	2	FBgn0031012
FBgn0001104.1	0	0.524140534	0.973	0.888	0	2	FBgn0001104
FBgn0036643.1	0	0.51955441	0.905	0.713	0	2	FBgn0036643
FBgn0285896	0	0.51817304	0.791	0.634	0	2	FBgn0285896
FBgn0028663.1	0	0.517398229	0.994	0.93	0	2	FBgn0028663
FBgn0039226	0	0.510192687	0.909	0.572	0	2	FBgn0039226
FBgn0035896.1	0	0.506644353	0.908	0.776	0	2	FBgn0035896
FBgn0046687	0	0.506049695	0.941	0.831	0	2	FBgn0046687
FBgn0086558.1	0	0.505886371	0.961	0.86	0	2	FBgn0086558
FBgn0026315.2	0	0.504692257	0.933	0.698	0	2	FBgn0026315
FBgn0036485.1	0	0.504428004	0.892	0.635	0	2	FBgn0036485
FBgn0030286.1	0	0.504277601	0.902	0.706	0	2	FBgn0030286
FBgn0040850	0	0.503714266	0.772	0.695	0	2	FBgn0040850
FBgn0037167	0	0.502950481	0.856	0.776	0	2	FBgn0037167
FBgn0035432.2	0	0.499929791	0.961	0.853	0	2	FBgn0035432
FBgn0267488	0	0.499832248	0.883	0.705	0	2	FBgn0267488
FBgn0026090	0	0.499321133	0.907	0.708	0	2	FBgn0026090
FBgn0285910.1	0	0.496249961	0.97	0.858	0	2	FBgn0285910
FBgn0045073.1	0	0.493464827	0.934	0.762	0	2	FBgn0045073
FBgn0029996	0	0.490474987	0.877	0.716	0	2	FBgn0029996
FBgn0261547.1	0	0.490114679	0.794	0.557	0	2	FBgn0261547
FBgn0259178.1	0	0.48829362	0.86	0.675	0	2	FBgn0259178
FBgn0026620.1	0	0.487135361	0.912	0.733	0	2	FBgn0026620
FBgn0013765	0	0.485449174	0.825	0.696	0	2	FBgn0013765
FBgn0085390.1	0	0.48476879	0.754	0.535	0	2	FBgn0085390
FBgn0036518.1	0	0.482481058	0.968	0.902	0	2	FBgn0036518
FBgn0037240	0	0.481526412	0.92	0.722	0	2	FBgn0037240
FBgn0010051.1	0	0.479980397	0.852	0.699	0	2	FBgn0010051
FBgn0035539.1	0	0.478203792	0.811	0.613	0	2	FBgn0035539
FBgn0038098	0	0.477868602	0.813	0.645	0	2	FBgn0038098
FBgn0024321	0	0.477434547	0.825	0.719	0	2	FBgn0024321
FBgn0283741.1	0	0.475695269	0.829	0.657	0	2	FBgn0283741
FBgn0011747	0	0.472274613	0.953	0.77	0	2	FBgn0011747
FBgn0262477	0	0.471364636	0.871	0.679	0	2	FBgn0262477
FBgn0035763	0	0.470955057	0.914	0.696	0	2	FBgn0035763
FBgn0000084	0	0.470181039	0.92	0.729	0	2	FBgn0000084
FBgn0010039.1	0	0.465565721	0.969	0.896	0	2	FBgn0010039
FBgn0031030.1	0	0.464513662	0.871	0.719	0	2	FBgn0031030
FBgn0262699.2	0	0.463959844	0.938	0.802	0	2	FBgn0262699
FBgn0034691	0	0.463367082	0.874	0.727	0	2	FBgn0034691
FBgn0035715.1	0	0.463197109	0.905	0.71	0	2	FBgn0035715
FBgn0261570.1	0	0.462584112	0.891	0.753	0	2	FBgn0261570
FBgn0031374.1	0	0.46004518	0.854	0.638	0	2	FBgn0031374
FBgn0029937.1	0	0.459490292	0.921	0.716	0	2	FBgn0029937
FBgn0030141	0	0.457861838	0.867	0.668	0	2	FBgn0030141
FBgn0033446.2	0	0.457727753	0.996	0.938	0	2	FBgn0033446
FBgn0016081	0	0.456012447	0.893	0.753	0	2	FBgn0016081
FBgn0001291.2	0	0.454491221	0.96	0.833	0	2	FBgn0001291
FBgn0011666.1	0	0.451519765	0.922	0.761	0	2	FBgn0011666
FBgn0013272.1	0	0.449898905	0.887	0.697	0	2	FBgn0013272
FBgn0263289	0	0.448685975	0.893	0.642	0	2	FBgn0263289
FBgn0015000.1	0	0.448666171	0.88	0.698	0	2	FBgn0015000
FBgn0035589	0	0.446677426	0.922	0.693	0	2	FBgn0035589
FBgn0011817	0	0.444890079	0.848	0.701	0	2	FBgn0011817
FBgn0040259	0	0.443751281	0.889	0.713	0	2	FBgn0040259
FBgn0015286.1	0	0.443338514	0.95	0.853	0	2	FBgn0015286
FBgn0033309.2	0	0.442120275	0.884	0.742	0	2	FBgn0033309
FBgn0035425	0	0.441945072	0.927	0.815	0	2	FBgn0035425
FBgn0038877	0	0.441466885	0.849	0.667	0	2	FBgn0038877
FBgn0041180.1	0	0.439865374	0.97	0.876	0	2	FBgn0041180
FBgn0035444	0	0.438366196	0.898	0.686	0	2	FBgn0035444
FBgn0001122	0	0.436011136	0.928	0.835	0	2	FBgn0001122
FBgn0040236	0	0.434394858	0.835	0.69	0	2	FBgn0040236
FBgn0260945	0	0.434314194	0.871	0.762	0	2	FBgn0260945
FBgn0022787	0	0.434171117	0.852	0.722	0	2	FBgn0022787
FBgn0039908	0	0.432130071	0.812	0.619	0	2	FBgn0039908
FBgn0263395.1	0	0.427462666	0.862	0.731	0	2	FBgn0263395
FBgn0016126	0	0.420968098	0.826	0.633	0	2	FBgn0016126
FBgn0037166	0	0.420837157	0.84	0.701	0	2	FBgn0037166
FBgn0039759.2	0	0.420477139	0.917	0.855	0	2	FBgn0039759
FBgn0028671	0	0.415402056	0.901	0.761	0	2	FBgn0028671
FBgn0037680	0	0.41439569	0.882	0.708	0	2	FBgn0037680
FBgn0052066.2	0	0.413633703	0.947	0.849	0	2	FBgn0052066
FBgn0010379	0	0.412903394	0.912	0.76	0	2	FBgn0010379
FBgn0085421.1	0	0.412356736	0.758	0.545	0	2	FBgn0085421
FBgn0016926	0	0.411379955	0.877	0.632	0	2	FBgn0016926
FBgn0267001.1	0	0.407493089	0.781	0.671	0	2	FBgn0267001
FBgn0037843.2	0	0.406204146	0.963	0.868	0	2	FBgn0037843
FBgn0030056	0	0.405041355	0.878	0.723	0	2	FBgn0030056
FBgn0052296.1	0	0.404939045	0.827	0.558	0	2	FBgn0052296
FBgn0039505	0	0.401796172	0.914	0.743	0	2	FBgn0039505
FBgn0030976	0	0.399357811	0.885	0.758	0	2	FBgn0030976
FBgn0036198	0	0.397951704	0.902	0.74	0	2	FBgn0036198
FBgn0013718.1	0	0.397564669	0.921	0.805	0	2	FBgn0013718
FBgn0260005	0	0.395220809	0.816	0.72	0	2	FBgn0260005
FBgn0024806	0	0.393869484	0.899	0.644	0	2	FBgn0024806
FBgn0004507	0	0.393639073	0.918	0.715	0	2	FBgn0004507
FBgn0038516.1	0	0.392308661	0.929	0.806	0	2	FBgn0038516
FBgn0033212.1	0	0.391736022	0.878	0.608	0	2	FBgn0033212
FBgn0085478.1	0	0.391120003	0.911	0.761	0	2	FBgn0085478
FBgn0041710.2	0	0.387124695	0.98	0.847	0	2	FBgn0041710
FBgn0031637.1	0	0.385645841	0.827	0.638	0	2	FBgn0031637
FBgn0013720	0	0.383324754	0.866	0.749	0	2	FBgn0013720
FBgn0259175	0	0.382610131	0.896	0.612	0	2	FBgn0259175
FBgn0026479.1	0	0.381070478	0.905	0.794	0	2	FBgn0026479
FBgn0000043.2	0	0.378659425	1	1	0	2	FBgn0000043
FBgn0039969	0	0.378257681	0.939	0.816	0	2	FBgn0039969
FBgn0035603.2	0	0.377137272	0.979	0.917	0	2	FBgn0035603
FBgn0036309	0	0.376582556	0.818	0.625	0	2	FBgn0036309
FBgn0283666	0	0.375995844	0.898	0.759	0	2	FBgn0283666
FBgn0259711	0	0.375943238	0.764	0.652	0	2	FBgn0259711
FBgn0039045	0	0.37568581	0.863	0.611	0	2	FBgn0039045
FBgn0039075	0	0.374324471	0.805	0.658	0	2	FBgn0039075
FBgn0004242	0	0.370732489	0.866	0.687	0	2	FBgn0004242
FBgn0028424	0	0.369986721	0.898	0.7	0	2	FBgn0028424
FBgn0004381	0	0.365020991	0.839	0.616	0	2	FBgn0004381
FBgn0010441	0	0.36473408	0.901	0.685	0	2	FBgn0010441
FBgn0050090.1	0	0.36396572	0.857	0.561	0	2	FBgn0050090
FBgn0037551	0	0.363408617	0.914	0.744	0	2	FBgn0037551
FBgn0027844	0	0.363088506	0.874	0.764	0	2	FBgn0027844
FBgn0032421	0	0.362769788	0.863	0.715	0	2	FBgn0032421
FBgn0035285	0	0.36269702	0.826	0.635	0	2	FBgn0035285
FBgn0027508	0	0.361591546	0.774	0.608	0	2	FBgn0027508
FBgn0029504	0	0.361423353	0.848	0.671	0	2	FBgn0029504
FBgn0263118.2	0	0.358852676	0.921	0.813	0	2	FBgn0263118
FBgn0034417.2	0	0.358770963	0.938	0.863	0	2	FBgn0034417
FBgn0266000	0	0.356411296	0.851	0.687	0	2	FBgn0266000
FBgn0035237	0	0.355815585	0.783	0.548	0	2	FBgn0035237
FBgn0261108	0	0.354188519	0.824	0.65	0	2	FBgn0261108
FBgn0038909	0	0.354164066	0.812	0.525	0	2	FBgn0038909
FBgn0261549	0	0.352665948	0.808	0.675	0	2	FBgn0261549
FBgn0050389	0	0.351808313	0.782	0.624	0	2	FBgn0050389
FBgn0032208	0	0.351172589	0.895	0.763	0	2	FBgn0032208
FBgn0028983	0	0.349654738	0.883	0.672	0	2	FBgn0028983
FBgn0041171.1	0	0.347991598	0.863	0.745	0	2	FBgn0041171
FBgn0020238.1	0	0.345941137	0.998	0.995	0	2	FBgn0020238
FBgn0053144	0	0.342451554	0.837	0.61	0	2	FBgn0053144
FBgn0033996	0	0.34215011	0.825	0.646	0	2	FBgn0033996
FBgn0035452	0	0.341398019	0.914	0.739	0	2	FBgn0035452
FBgn0250785.1	0	0.340874905	0.908	0.727	0	2	FBgn0250785
FBgn0038349	0	0.339877128	0.883	0.651	0	2	FBgn0038349
FBgn0039466	0	0.3397098	0.768	0.595	0	2	FBgn0039466
FBgn0032955	0	0.339477487	0.773	0.584	0	2	FBgn0032955
FBgn0038100	0	0.337258473	0.894	0.723	0	2	FBgn0038100
FBgn0062440	0	0.332151648	0.869	0.736	0	2	FBgn0062440
FBgn0032420	0	0.330131069	0.882	0.708	0	2	FBgn0032420
FBgn0010415.1	0	0.329675566	0.814	0.563	0	2	FBgn0010415
FBgn0023526	0	0.327408533	0.885	0.663	0	2	FBgn0023526
FBgn0015296	0	0.324657536	0.899	0.759	0	2	FBgn0015296
FBgn0032681	0	0.319849922	0.813	0.7	0	2	FBgn0032681
FBgn0031268	0	0.318807511	0.886	0.727	0	2	FBgn0031268
FBgn0033551	0	0.318469359	0.824	0.582	0	2	FBgn0033551
FBgn0039155	0	0.317950812	0.796	0.734	0	2	FBgn0039155
FBgn0036778	0	0.317264003	0.787	0.656	0	2	FBgn0036778
FBgn0035975	0	0.315745368	0.821	0.578	0	2	FBgn0035975
FBgn0260746.2	0	0.315299843	0.848	0.685	0	2	FBgn0260746
FBgn0026369	0	0.313746617	0.881	0.664	0	2	FBgn0026369
FBgn0267698	0	0.313406884	0.801	0.625	0	2	FBgn0267698
FBgn0027865	0	0.31269598	0.891	0.689	0	2	FBgn0027865
FBgn0000479	0	0.310637529	0.861	0.649	0	2	FBgn0000479
FBgn0010768	0	0.309995425	0.791	0.653	0	2	FBgn0010768
FBgn0031990	0	0.309490585	0.893	0.735	0	2	FBgn0031990
FBgn0032218	0	0.307386161	0.836	0.433	0	2	FBgn0032218
FBgn0052311	0	0.306377678	0.842	0.717	0	2	FBgn0052311
FBgn0263110	0	0.305224332	0.823	0.674	0	2	FBgn0263110
FBgn0261560	0	0.304108279	0.81	0.535	0	2	FBgn0261560
FBgn0023508	0	0.303645948	0.808	0.522	0	2	FBgn0023508
FBgn0013997	0	0.302021493	0.844	0.598	0	2	FBgn0013997
FBgn0026570	0	0.300209	0.869	0.741	0	2	FBgn0026570
FBgn0036299	0	0.299157024	0.893	0.742	0	2	FBgn0036299
FBgn0267390	0	0.29825514	0.833	0.694	0	2	FBgn0267390
FBgn0033476.1	0	0.296305032	0.877	0.629	0	2	FBgn0033476
FBgn0038388	0	0.295556436	0.854	0.667	0	2	FBgn0038388
FBgn0031190.1	0	0.295302502	0.877	0.677	0	2	FBgn0031190
FBgn0031470.1	0	0.293274992	0.895	0.748	0	2	FBgn0031470
FBgn0035499	0	0.286481386	1	0.999	0	2	FBgn0035499
FBgn0261563	0	0.285221095	0.745	0.613	0	2	FBgn0261563
FBgn0033875	0	0.284512803	0.845	0.72	0	2	FBgn0033875
FBgn0039637	0	0.284121914	0.829	0.621	0	2	FBgn0039637
FBgn0039844.2	0	0.28240806	0.91	0.845	0	2	FBgn0039844
FBgn0044047	0	0.278628121	0.89	0.596	0	2	FBgn0044047
FBgn0265194	0	0.27605428	0.843	0.608	0	2	FBgn0265194
FBgn0033051	0	0.275353323	0.785	0.545	0	2	FBgn0033051
FBgn0033502	0	0.271543977	0.731	0.685	0	2	FBgn0033502
FBgn0017558	0	0.26903306	0.851	0.624	0	2	FBgn0017558
FBgn0015803	0	0.268626721	0.809	0.657	0	2	FBgn0015803
FBgn0085282	0	0.26664484	0.775	0.704	0	2	FBgn0085282
FBgn0053192.1	0	0.266581776	0.928	0.811	0	2	FBgn0053192
FBgn0026160.1	0	0.266230803	0.839	0.55	0	2	FBgn0026160
FBgn0259734	0	0.264102054	0.832	0.612	0	2	FBgn0259734
FBgn0085453	0	0.261294625	0.829	0.606	0	2	FBgn0085453
FBgn0053087	0	0.26031662	0.801	0.713	0	2	FBgn0053087
FBgn0034723	0	0.259925017	0.854	0.753	0	2	FBgn0034723
FBgn0035204	0	0.259440113	0.832	0.664	0	2	FBgn0035204
FBgn0259736	0	0.256923791	0.742	0.587	0	2	FBgn0259736
FBgn0031460	0	0.256517735	0.817	0.621	0	2	FBgn0031460
FBgn0033520	0	0.255979338	0.889	0.646	0	2	FBgn0033520
FBgn0033127	0	0.254748513	0.885	0.735	0	2	FBgn0033127
FBgn0032899	0	0.251004531	0.847	0.702	0	2	FBgn0032899
FBgn0015929	0	-0.251112978	0.807	0.751	0	2	FBgn0015929
FBgn0034614	0	-0.255547803	0.776	0.789	0	2	FBgn0034614
FBgn0262945	0	-0.273642334	0.659	0.797	0	2	FBgn0262945
FBgn0031824	0	-0.289761479	0.658	0.742	0	2	FBgn0031824
FBgn0026079	0	-0.29313612	0.81	0.828	0	2	FBgn0026079
FBgn0037248	0	-0.31384952	0.786	0.78	0	2	FBgn0037248
FBgn0022069	0	-0.32144784	0.787	0.837	0	2	FBgn0022069
FBgn0000719.2	0	-0.323156878	0.724	0.76	0	2	FBgn0000719
FBgn0023170	0	-0.328882456	1	1	0	2	FBgn0023170
FBgn0004106	0	-0.329547667	0.643	0.768	0	2	FBgn0004106
FBgn0035829	0	-0.349915737	0.776	0.825	0	2	FBgn0035829
FBgn0086356.2	0	-0.362733363	0.723	0.779	0	2	FBgn0086356
FBgn0035209.2	0	-0.366672478	0.649	0.837	0	2	FBgn0035209
FBgn0020633	0	-0.368907875	0.793	0.794	0	2	FBgn0020633
FBgn0004378.2	0	-0.370390198	0.583	0.708	0	2	FBgn0004378
FBgn0011704	0	-0.370462029	0.754	0.816	0	2	FBgn0011704
FBgn0260991.2	0	-0.371022634	0.737	0.768	0	2	FBgn0260991
FBgn0031738.2	0	-0.379159428	0.658	0.766	0	2	FBgn0031738
FBgn0032906	0	-0.384552137	0.858	0.845	0	2	FBgn0032906
FBgn0011703	0	-0.404257611	0.799	0.835	0	2	FBgn0011703
FBgn0034194	0	-0.413020342	0.767	0.774	0	2	FBgn0034194
FBgn0032638.2	0	-0.414983838	0.824	0.784	0	2	FBgn0032638
FBgn0030241.2	0	-0.429351133	0.793	0.798	0	2	FBgn0030241
FBgn0024227.2	0	-0.447545732	0.742	0.81	0	2	FBgn0024227
FBgn0040398	0	-0.470796479	1	0.999	0	2	FBgn0040398
FBgn0005278.2	0	-0.475245329	0.695	0.874	0	2	FBgn0005278
FBgn0032078.1	0	-0.49079972	0.782	0.812	0	2	FBgn0032078
FBgn0022359	0	-0.495082121	0.807	0.875	0	2	FBgn0022359
FBgn0029823	0	-0.51079766	0.826	0.844	0	2	FBgn0029823
FBgn0002778.1	0	-0.533022298	0.842	0.875	0	2	FBgn0002778
FBgn0011705	0	-0.53630589	0.704	0.828	0	2	FBgn0011705
FBgn0005655.1	0	-0.550517701	0.842	0.854	0	2	FBgn0005655
FBgn0029148	0	-0.554080688	0.852	0.887	0	2	FBgn0029148
FBgn0040007	0	-0.565713378	0.999	1	0	2	FBgn0040007
FBgn0264343.2	0	-0.644719968	0.85	0.877	0	2	FBgn0264343
FBgn0265048.2	0	-0.685988304	0.711	0.781	0	2	FBgn0265048
FBgn0037913.1	0	-0.69378675	0.901	0.864	0	2	FBgn0037913
FBgn0034139.2	0	-0.701675693	0.803	0.823	0	2	FBgn0034139
FBgn0086254.2	0	-0.713157151	0.83	0.883	0	2	FBgn0086254
FBgn0011722.2	0	-0.726204647	0.706	0.765	0	2	FBgn0011722
FBgn0029093.2	0	-0.731145309	0.893	0.882	0	2	FBgn0029093
FBgn0030993.2	0	-0.748291306	0.745	0.809	0	2	FBgn0030993
FBgn0051219	0	-0.749662847	0.86	0.936	0	2	FBgn0051219
FBgn0003525.2	0	-0.751778381	0.759	0.807	0	2	FBgn0003525
FBgn0030234.2	0	-0.771280522	0.788	0.891	0	2	FBgn0030234
FBgn0025682.2	0	-0.851926184	0.849	0.871	0	2	FBgn0025682
FBgn0262656	0	-0.856243468	0.719	0.822	0	2	FBgn0262656
FBgn0260768.2	0	-0.863124552	0.889	0.915	0	2	FBgn0260768
FBgn0032006.2	0	-0.888704996	0.823	0.877	0	2	FBgn0032006
FBgn0031453.2	0	-0.893026552	0.96	0.959	0	2	FBgn0031453
FBgn0040309	0	-0.897549695	0.929	0.958	0	2	FBgn0040309
FBgn0085466.2	0	-0.898185017	0.912	0.912	0	2	FBgn0085466
FBgn0250837.2	0	-0.910734931	0.829	0.897	0	2	FBgn0250837
FBgn0011824	0	-0.927728481	0.854	0.924	0	2	FBgn0011824
FBgn0003062	0	-0.941936172	0.793	0.912	0	2	FBgn0003062
FBgn0001233	0	-0.958288957	0.915	0.975	0	2	FBgn0001233
FBgn0026196	0	-0.990988915	0.84	0.923	0	2	FBgn0026196
FBgn0030796.2	0	-0.992676243	0.831	0.84	0	2	FBgn0030796
FBgn0262794.1	0	-1.026958391	0.943	0.959	0	2	FBgn0262794
FBgn0034753.2	0	-1.041705174	0.951	0.967	0	2	FBgn0034753
FBgn0030362.1	0	-1.046647832	0.91	0.937	0	2	FBgn0030362
FBgn0010228.2	0	-1.074420366	0.89	0.924	0	2	FBgn0010228
FBgn0267348.2	0	-1.081178473	0.858	0.873	0	2	FBgn0267348
FBgn0040752.2	0	-1.08755645	0.765	0.843	0	2	FBgn0040752
FBgn0003495.2	0	-1.093195379	0.858	0.918	0	2	FBgn0003495
FBgn0029147.2	0	-1.119891714	0.638	0.775	0	2	FBgn0029147
FBgn0267727.2	0	-1.126821194	0.786	0.866	0	2	FBgn0267727
FBgn0034761.2	0	-1.127529631	0.974	0.974	0	2	FBgn0034761
FBgn0259937	0	-1.14529353	0.86	0.94	0	2	FBgn0259937
FBgn0031261.2	0	-1.181514706	0.839	0.861	0	2	FBgn0031261
FBgn0013763.2	0	-1.190083441	0.86	0.921	0	2	FBgn0013763
FBgn0264437.2	0	-1.247275932	0.875	0.91	0	2	FBgn0264437
FBgn0001114.2	0	-1.263328273	0.745	0.803	0	2	FBgn0001114
FBgn0004167.2	0	-1.269678838	0.815	0.919	0	2	FBgn0004167
FBgn0025885.2	0	-1.276629882	0.769	0.912	0	2	FBgn0025885
FBgn0261800.2	0	-1.29793638	0.805	0.888	0	2	FBgn0261800
FBgn0014388.2	0	-1.300796835	0.77	0.926	0	2	FBgn0014388
FBgn0002526.2	0	-1.350408242	0.815	0.894	0	2	FBgn0002526
FBgn0000299.2	0	-1.592032694	0.851	0.898	0	2	FBgn0000299
FBgn0011828.2	0	-1.594151212	0.811	0.893	0	2	FBgn0011828
FBgn0259740.2	0	-1.663438496	0.97	0.995	0	2	FBgn0259740
FBgn0026562.2	0	-1.697298394	0.836	0.93	0	2	FBgn0026562
FBgn0040813.2	0	-2.021375719	0.988	0.993	0	2	FBgn0040813
FBgn0003137.2	0	-2.034039475	0.959	0.99	0	2	FBgn0003137
FBgn0029167.2	0	-2.058257154	0.821	0.897	0	2	FBgn0029167
FBgn0085443	8.84E-305	0.335845365	0.783	0.664	1.77E-301	2	FBgn0085443
FBgn0061198	4.90E-304	0.348927357	0.967	0.882	9.79E-301	2	FBgn0061198
FBgn0034970.1	3.60E-303	0.336895104	0.901	0.763	7.21E-300	2	FBgn0034970
FBgn0262733	3.42E-302	0.340370622	0.781	0.675	6.85E-299	2	FBgn0262733
FBgn0035049.2	3.86E-300	0.504211553	0.853	0.711	7.71E-297	2	FBgn0035049
FBgn0001218	3.24E-298	-0.444750476	0.991	0.986	6.47E-295	2	FBgn0001218
FBgn0030090	6.08E-298	0.272916241	0.853	0.709	1.22E-294	2	FBgn0030090
FBgn0024920	4.07E-296	-0.256664806	0.74	0.748	8.14E-293	2	FBgn0024920
FBgn0015790.2	6.87E-296	0.381008658	0.989	0.933	1.37E-292	2	FBgn0015790
FBgn0002924.2	7.13E-296	-0.28932854	0.655	0.724	1.43E-292	2	FBgn0002924
FBgn0032821	1.98E-295	0.402037087	0.746	0.641	3.96E-292	2	FBgn0032821
FBgn0038842.2	1.05E-294	0.406367047	0.998	0.977	2.10E-291	2	FBgn0038842
FBgn0034583.1	9.02E-294	0.493765322	0.911	0.733	1.80E-290	2	FBgn0034583
FBgn0033121	5.11E-292	0.284769054	0.785	0.62	1.02E-288	2	FBgn0033121
FBgn0040237	3.65E-288	-0.315605804	0.735	0.798	7.31E-285	2	FBgn0040237
FBgn0261385.2	1.50E-287	-0.444744981	0.676	0.733	3.00E-284	2	FBgn0261385
FBgn0025335	1.67E-287	0.278438898	0.909	0.788	3.34E-284	2	FBgn0025335
FBgn0033153.2	1.46E-285	-0.581081879	0.681	0.715	2.91E-282	2	FBgn0033153
FBgn0026320	1.24E-282	0.297670361	0.672	0.58	2.48E-279	2	FBgn0026320
FBgn0033907	7.86E-282	-0.298718861	0.786	0.854	1.57E-278	2	FBgn0033907
FBgn0034985.2	7.70E-279	-0.488140087	0.717	0.728	1.54E-275	2	FBgn0034985
FBgn0030328.1	1.67E-277	0.415073399	0.895	0.824	3.34E-274	2	FBgn0030328
FBgn0039132	1.58E-275	0.305746009	0.867	0.735	3.16E-272	2	FBgn0039132
FBgn0261628.2	2.13E-275	-0.76771317	0.741	0.774	4.26E-272	2	FBgn0261628
FBgn0058469.1	2.94E-275	0.424231756	0.996	0.979	5.88E-272	2	FBgn0058469
FBgn0032105.1	2.81E-274	-0.381756565	0.711	0.731	5.63E-271	2	FBgn0032105
FBgn0015924.1	7.28E-274	0.356314375	0.819	0.57	1.46E-270	2	FBgn0015924
FBgn0265487	1.97E-271	0.346584448	0.753	0.581	3.94E-268	2	FBgn0265487
FBgn0063449	3.55E-270	-0.257958239	0.69	0.703	7.11E-267	2	FBgn0063449
FBgn0038826.2	6.91E-270	-0.610217837	0.709	0.808	1.38E-266	2	FBgn0038826
FBgn0038250.2	1.51E-269	-0.524023409	0.761	0.76	3.02E-266	2	FBgn0038250
FBgn0025641.1	1.69E-269	0.321957239	0.799	0.622	3.39E-266	2	FBgn0025641
FBgn0053329.1	5.36E-268	0.51904592	0.775	0.757	1.07E-264	2	FBgn0053329
FBgn0004647.1	2.04E-266	-0.715837335	0.698	0.744	4.08E-263	2	FBgn0004647
FBgn0027598.2	4.30E-264	-0.695075757	0.577	0.712	8.59E-261	2	FBgn0027598
FBgn0045823.2	1.97E-263	-0.664428954	0.956	0.951	3.93E-260	2	FBgn0045823
FBgn0012034	5.80E-258	0.306298357	0.862	0.751	1.16E-254	2	FBgn0012034
FBgn0052194	5.21E-257	0.291522687	0.749	0.678	1.04E-253	2	FBgn0052194
FBgn0285955	1.51E-256	0.253316205	0.804	0.65	3.03E-253	2	FBgn0285955
FBgn0016075.2	7.44E-255	-0.868257536	0.729	0.749	1.49E-251	2	FBgn0016075
FBgn0014906	2.67E-254	0.300041962	0.882	0.74	5.34E-251	2	FBgn0014906
FBgn0029174	1.54E-253	-0.628066745	0.907	0.908	3.09E-250	2	FBgn0029174
FBgn0031566	5.06E-253	0.30506886	0.819	0.693	1.01E-249	2	FBgn0031566
FBgn0019952.2	3.76E-252	-0.393992651	0.718	0.714	7.51E-249	2	FBgn0019952
FBgn0010350	2.68E-250	0.262817256	0.777	0.657	5.36E-247	2	FBgn0010350
FBgn0086708	9.58E-248	0.328407891	0.713	0.636	1.92E-244	2	FBgn0086708
FBgn0266420.2	2.80E-245	-0.445052685	0.768	0.769	5.60E-242	2	FBgn0266420
FBgn0034091	7.27E-245	0.335409005	0.823	0.661	1.45E-241	2	FBgn0034091
FBgn0037315	2.04E-244	0.294413398	0.795	0.667	4.08E-241	2	FBgn0037315
FBgn0038809	3.47E-241	0.254912577	0.842	0.705	6.95E-238	2	FBgn0038809
FBgn0030400.2	1.16E-240	0.278103566	0.905	0.775	2.31E-237	2	FBgn0030400
FBgn0025558	4.21E-239	0.254646775	0.893	0.791	8.42E-236	2	FBgn0025558
FBgn0041585.2	3.24E-238	0.336334198	0.88	0.72	6.49E-235	2	FBgn0041585
FBgn0261445	9.05E-232	-0.273303381	0.795	0.751	1.81E-228	2	FBgn0261445
FBgn0033724.2	3.79E-230	-0.958451714	0.968	0.94	7.59E-227	2	FBgn0033724
FBgn0035517	1.18E-228	0.313071992	0.835	0.732	2.36E-225	2	FBgn0035517
FBgn0045852.2	1.88E-227	-0.66271296	0.769	0.827	3.77E-224	2	FBgn0045852
FBgn0034245	2.24E-224	-0.507819593	0.934	0.936	4.48E-221	2	FBgn0034245
FBgn0035888	4.31E-224	-0.264335855	0.63	0.697	8.62E-221	2	FBgn0035888
FBgn0259896.2	8.33E-224	-0.973078828	0.868	0.857	1.67E-220	2	FBgn0259896
FBgn0266720	2.77E-223	0.263282637	0.802	0.681	5.54E-220	2	FBgn0266720
FBgn0033725.2	6.26E-223	-0.602906656	0.835	0.821	1.25E-219	2	FBgn0033725
FBgn0025815	2.64E-220	-0.260736574	0.729	0.717	5.28E-217	2	FBgn0025815
FBgn0265375.2	8.10E-220	0.252727134	0.957	0.861	1.62E-216	2	FBgn0265375
FBgn0250868	3.06E-215	0.272858649	0.916	0.793	6.12E-212	2	FBgn0250868
FBgn0029118	3.85E-212	-0.291751142	0.796	0.759	7.71E-209	2	FBgn0029118
FBgn0030529.2	1.43E-211	0.28622939	0.982	0.934	2.87E-208	2	FBgn0030529
FBgn0004652	2.23E-211	-0.267901512	0.753	0.705	4.46E-208	2	FBgn0004652
FBgn0034501.1	3.16E-208	0.316558486	0.816	0.662	6.32E-205	2	FBgn0034501
FBgn0038320	4.76E-206	0.254858005	0.898	0.809	9.52E-203	2	FBgn0038320
FBgn0267505.1	2.45E-202	-0.531621098	0.843	0.884	4.91E-199	2	FBgn0267505
FBgn0027509.1	1.17E-200	0.260229282	0.837	0.714	2.34E-197	2	FBgn0027509
FBgn0267033.1	1.65E-195	-0.509894504	0.707	0.703	3.30E-192	2	FBgn0267033
FBgn0023407.1	1.26E-191	0.269208789	0.838	0.796	2.52E-188	2	FBgn0023407
FBgn0033469.2	9.01E-191	-0.496502806	0.892	0.9	1.80E-187	2	FBgn0033469
FBgn0261238	1.17E-190	-0.257521021	0.609	0.695	2.34E-187	2	FBgn0261238
FBgn0259715.1	1.91E-190	-0.270661162	0.358	0.576	3.83E-187	2	FBgn0259715
FBgn0040837	7.12E-189	-0.461454002	0.78	0.745	1.42E-185	2	FBgn0040837
FBgn0033949.2	2.24E-188	-0.820848332	0.618	0.673	4.49E-185	2	FBgn0033949
FBgn0033913.1	4.38E-188	-0.382954574	0.806	0.86	8.77E-185	2	FBgn0033913
FBgn0031805.2	2.17E-185	-0.300445642	0.786	0.74	4.35E-182	2	FBgn0031805
FBgn0028542.2	6.16E-185	-0.663340328	0.685	0.717	1.23E-181	2	FBgn0028542
FBgn0004921	2.77E-183	0.28618164	0.995	0.964	5.54E-180	2	FBgn0004921
FBgn0010300.2	5.20E-182	-0.361820965	0.791	0.756	1.04E-178	2	FBgn0010300
FBgn0004449.2	2.92E-181	-0.81228608	0.783	0.751	5.84E-178	2	FBgn0004449
FBgn0033844	6.35E-181	-0.343066977	0.611	0.709	1.27E-177	2	FBgn0033844
FBgn0030943	1.49E-178	-0.260464565	0.805	0.798	2.98E-175	2	FBgn0030943
FBgn0040091.2	9.30E-173	-0.372494944	0.786	0.758	1.86E-169	2	FBgn0040091
FBgn0001226.1	2.24E-172	-0.558706327	0.637	0.666	4.48E-169	2	FBgn0001226
FBgn0026721.2	2.90E-172	-0.846825127	0.755	0.754	5.80E-169	2	FBgn0026721
FBgn0035679.2	2.33E-165	-0.360591992	0.823	0.644	4.66E-162	2	FBgn0035679
FBgn0025621	9.06E-165	0.252722143	0.762	0.701	1.81E-161	2	FBgn0025621
FBgn0002733.1	3.57E-163	-0.412251087	0.739	0.707	7.15E-160	2	FBgn0002733
FBgn0039776.2	8.94E-159	-0.632549095	0.894	0.872	1.79E-155	2	FBgn0039776
FBgn0003053.2	6.59E-157	-0.320648905	0.663	0.722	1.32E-153	2	FBgn0003053
FBgn0045842.2	4.08E-152	0.273776843	0.799	0.747	8.16E-149	2	FBgn0045842
FBgn0034010	5.18E-152	-0.928040148	0.972	0.93	1.04E-148	2	FBgn0034010
FBgn0035438	2.00E-151	0.266544636	0.958	0.841	4.00E-148	2	FBgn0035438
FBgn0086694.1	3.81E-148	0.315321301	0.727	0.62	7.61E-145	2	FBgn0086694
FBgn0263773.1	4.50E-146	-0.342553529	0.66	0.441	9.01E-143	2	FBgn0263773
FBgn0051337.2	9.07E-145	-0.639868896	0.587	0.631	1.81E-141	2	FBgn0051337
FBgn0243514.2	1.58E-143	-0.600869036	0.586	0.632	3.16E-140	2	FBgn0243514
FBgn0000044.1	2.95E-139	-0.342729294	0.863	0.856	5.90E-136	2	FBgn0000044
FBgn0051075.2	4.25E-138	-0.536868792	0.842	0.806	8.50E-135	2	FBgn0051075
FBgn0034398.2	3.61E-137	-0.56234705	0.922	0.864	7.22E-134	2	FBgn0034398
FBgn0035076.2	4.51E-136	-0.785786778	0.702	0.673	9.01E-133	2	FBgn0035076
FBgn0031913.2	1.61E-134	-0.44200117	0.874	0.842	3.22E-131	2	FBgn0031913
FBgn0038720	1.73E-130	0.301580152	0.806	0.82	3.46E-127	2	FBgn0038720
FBgn0036728	3.54E-129	-0.378074439	0.964	0.952	7.08E-126	2	FBgn0036728
FBgn0052267	2.84E-127	-0.284055924	0.852	0.843	5.67E-124	2	FBgn0052267
FBgn0002873.1	3.37E-127	-0.287992901	0.743	0.7	6.73E-124	2	FBgn0002873
FBgn0019661.2	1.82E-125	-0.494650978	0.853	0.901	3.64E-122	2	FBgn0019661
FBgn0029092.2	6.70E-121	-0.696492602	0.868	0.815	1.34E-117	2	FBgn0029092
FBgn0040102.2	2.33E-120	-0.441670012	0.552	0.604	4.65E-117	2	FBgn0040102
FBgn0050463.2	6.03E-115	-0.346936676	0.634	0.639	1.21E-111	2	FBgn0050463
FBgn0259111.2	1.42E-109	-0.463079068	0.604	0.62	2.84E-106	2	FBgn0259111
FBgn0003124.2	4.99E-105	-0.289305254	0.651	0.652	9.97E-102	2	FBgn0003124
FBgn0264815.2	8.94E-104	-0.585702062	0.642	0.703	1.79E-100	2	FBgn0264815
FBgn0051637	5.92E-98	-0.385192276	0.785	0.722	1.18E-94	2	FBgn0051637
FBgn0030521.2	2.88E-95	-0.43001421	0.916	0.873	5.76E-92	2	FBgn0030521
FBgn0267252.2	2.42E-93	-0.361654231	0.829	0.855	4.84E-90	2	FBgn0267252
FBgn0051324.2	2.69E-93	-0.340627779	0.94	0.932	5.38E-90	2	FBgn0051324
FBgn0038476.2	4.14E-93	-0.42273555	0.739	0.686	8.28E-90	2	FBgn0038476
FBgn0050069	9.95E-93	0.266428933	0.608	0.555	1.99E-89	2	FBgn0050069
FBgn0261556.2	1.06E-90	-0.47743516	0.653	0.645	2.13E-87	2	FBgn0261556
FBgn0250848.2	1.08E-83	-0.456524025	0.897	0.844	2.16E-80	2	FBgn0250848
FBgn0034390	7.49E-81	-0.370228537	0.851	0.742	1.50E-77	2	FBgn0034390
FBgn0027611	1.72E-75	-0.345364542	0.697	0.616	3.44E-72	2	FBgn0027611
FBgn0034880.1	6.48E-74	-0.402912575	0.814	0.757	1.30E-70	2	FBgn0034880
FBgn0010225.2	2.00E-71	-0.476221674	0.768	0.703	4.01E-68	2	FBgn0010225
FBgn0262881.2	9.32E-71	-0.727753068	0.716	0.665	1.86E-67	2	FBgn0262881
FBgn0020415.2	1.40E-69	-0.450394008	0.97	0.924	2.81E-66	2	FBgn0020415
FBgn0038353.2	6.33E-69	-0.310468419	0.543	0.624	1.27E-65	2	FBgn0038353
FBgn0031327.2	1.76E-60	0.282888575	0.98	0.882	3.53E-57	2	FBgn0031327
FBgn0000578.2	6.83E-60	-0.465118912	0.711	0.692	1.37E-56	2	FBgn0000578
FBgn0052626.2	8.13E-58	-0.272886664	0.829	0.835	1.63E-54	2	FBgn0052626
FBgn0036857	9.71E-58	-0.291730728	0.595	0.578	1.94E-54	2	FBgn0036857
FBgn0259735.2	7.58E-50	-0.390879602	0.847	0.79	1.52E-46	2	FBgn0259735
FBgn0014163.2	1.84E-46	0.280171461	0.958	0.912	3.67E-43	2	FBgn0014163
FBgn0001224	2.17E-42	-0.362182953	0.627	0.627	4.34E-39	2	FBgn0001224
FBgn0028990.2	3.01E-40	-0.342095805	0.788	0.707	6.02E-37	2	FBgn0028990
FBgn0283461.2	3.81E-40	-0.364483141	0.922	0.888	7.61E-37	2	FBgn0283461
FBgn0037723.2	2.02E-38	-0.25524714	0.871	0.885	4.05E-35	2	FBgn0037723
FBgn0041094.2	5.29E-35	-0.363755322	0.878	0.812	1.06E-31	2	FBgn0041094
FBgn0053465	1.49E-33	-0.260133258	0.763	0.597	2.98E-30	2	FBgn0053465
FBgn0036007.1	6.48E-33	-0.32151598	0.88	0.835	1.30E-29	2	FBgn0036007
FBgn0266569.2	2.25E-32	-0.395925843	0.951	0.908	4.49E-29	2	FBgn0266569
FBgn0051092.1	4.49E-29	-0.268101336	0.827	0.833	8.98E-26	2	FBgn0051092
FBgn0031914.2	3.24E-28	-0.358937882	0.604	0.557	6.48E-25	2	FBgn0031914
FBgn0028514.2	2.76E-27	-0.48603664	0.783	0.749	5.52E-24	2	FBgn0028514
FBgn0036848	1.18E-26	-0.261458745	0.719	0.678	2.36E-23	2	FBgn0036848
FBgn0000250.1	1.62E-21	-0.279986921	0.842	0.794	3.24E-18	2	FBgn0000250
FBgn0002773.1	2.23E-18	-0.291871268	0.879	0.862	4.46E-15	2	FBgn0002773
FBgn0001225	3.05E-18	-0.475703497	0.668	0.635	6.10E-15	2	FBgn0001225
FBgn0033777.2	2.47E-16	-0.363592789	0.871	0.793	4.94E-13	2	FBgn0033777
FBgn0032721	1.45E-15	-0.264101346	0.882	0.834	2.89E-12	2	FBgn0032721
FBgn0069923.1	4.94E-15	-0.256807337	0.854	0.832	9.88E-12	2	FBgn0069923
FBgn0028331.2	8.91E-13	-0.309506426	0.852	0.659	1.78E-09	2	FBgn0028331
FBgn0037228.2	1.11E-12	-0.426337978	0.856	0.73	2.22E-09	2	FBgn0037228
FBgn0035189.2	7.54E-12	-0.340123326	0.559	0.59	1.51E-08	2	FBgn0035189
FBgn0032405.2	9.94E-11	-0.419673489	0.743	0.644	1.99E-07	2	FBgn0032405
FBgn0001248.2	5.85E-09	-0.302142747	0.749	0.675	1.17E-05	2	FBgn0001248
FBgn0042106.2	4.08E-08	-0.507033825	0.941	0.911	8.17E-05	2	FBgn0042106
FBgn0286198	6.43E-08	-0.269072537	0.725	0.622	0.000128629	2	FBgn0286198
FBgn0266376	1.29E-07	-0.278974135	0.773	0.534	0.00025754	2	FBgn0266376
FBgn0020414.2	1.67E-05	-0.256238143	0.902	0.788	0.033326033	2	FBgn0020414
FBgn0014865.1	2.11E-05	-0.272100197	0.862	0.796	0.042220119	2	FBgn0014865
FBgn0283437.2	3.38E-05	-1.641696251	0.88	0.795	0.067532422	2	FBgn0283437
FBgn0034405.1	0.000304833	-0.250085708	0.787	0.612	0.609665277	2	FBgn0034405
FBgn0027594.2	0.008725036	-0.288958261	0.818	0.651	1	2	FBgn0027594
FBgn0264437.3	0	1.427159453	0.977	0.891	0	3	FBgn0264437
FBgn0034010.1	0	1.354760585	0.937	0.939	0	3	FBgn0034010
FBgn0259937.1	0	0.809694535	0.97	0.917	0	3	FBgn0259937
FBgn0025885.3	0	0.744636211	0.937	0.875	0	3	FBgn0025885
FBgn0022359.1	0	0.571755412	0.879	0.858	0	3	FBgn0022359
FBgn0029823.1	0	0.547460776	0.895	0.832	0	3	FBgn0029823
FBgn0086365	0	0.338334745	0.84	0.747	0	3	FBgn0086365
FBgn0013679.1	0	0.301012917	1	0.998	0	3	FBgn0013679
FBgn0053192.2	0	-0.302016506	0.733	0.851	0	3	FBgn0053192
FBgn0034724.1	0	-0.37884266	0.829	0.89	0	3	FBgn0034724
FBgn0010238.3	0	-0.380997983	0.749	0.828	0	3	FBgn0010238
FBgn0262563.3	0	-0.386503243	0.713	0.85	0	3	FBgn0262563
FBgn0267910.2	0	-0.396843853	1	1	0	3	FBgn0267910
FBgn0035587.3	0	-0.466303139	0.812	0.892	0	3	FBgn0035587
FBgn0000043.3	0	-0.495816933	1	1	0	3	FBgn0000043
FBgn0000308.2	0	-0.507536189	0.983	0.995	0	3	FBgn0000308
FBgn0030847.2	0	-0.553968753	0.692	0.847	0	3	FBgn0030847
FBgn0039747.3	0	-0.622898773	0.576	0.801	0	3	FBgn0039747
FBgn0030955.1	0	-0.643729896	0.856	0.967	0	3	FBgn0030955
FBgn0000083.2	0	-0.666885981	0.977	0.996	0	3	FBgn0000083
FBgn0001105.2	0	-0.687157814	0.952	0.987	0	3	FBgn0001105
FBgn0051769.3	0	-0.707885304	0.818	0.917	0	3	FBgn0051769
FBgn0013770.2	0	-0.73937681	0.883	0.98	0	3	FBgn0013770
FBgn0000253.3	0	-0.794421829	1	1	0	3	FBgn0000253
FBgn0004636.2	0	-0.830966281	0.96	0.987	0	3	FBgn0004636
FBgn0000042.3	0	-0.859923351	1	1	0	3	FBgn0000042
FBgn0041710.3	0	-0.906906448	0.722	0.897	0	3	FBgn0041710
FBgn0000256.3	0	-0.924628703	0.614	0.838	0	3	FBgn0000256
FBgn0051363.3	0	-0.925971665	0.976	0.994	0	3	FBgn0051363
FBgn0004456.2	0	-0.945445519	0.772	0.92	0	3	FBgn0004456
FBgn0014011.3	0	-1.000770212	0.825	0.95	0	3	FBgn0014011
FBgn0086347.2	0	-1.01452497	0.849	0.968	0	3	FBgn0086347
FBgn0004657.2	0	-1.03668376	0.914	0.979	0	3	FBgn0004657
FBgn0032140.2	0	-1.042884906	0.791	0.938	0	3	FBgn0032140
FBgn0051729.2	0	-1.065606486	0.798	0.908	0	3	FBgn0051729
FBgn0260442.2	0	-1.072463058	0.888	0.966	0	3	FBgn0260442
FBgn0265413.3	0	-1.075744182	0.875	0.943	0	3	FBgn0265413
FBgn0041087.2	0	-1.108547487	0.868	0.949	0	3	FBgn0041087
FBgn0035708.2	0	-1.138853429	0.681	0.842	0	3	FBgn0035708
FBgn0024238.3	0	-1.176118683	0.795	0.94	0	3	FBgn0024238
FBgn0026084.2	0	-1.302337235	0.955	0.995	0	3	FBgn0026084
FBgn0053225.3	0	-1.317268734	0.897	0.961	0	3	FBgn0053225
FBgn0003886.2	0	-1.341454573	0.997	1	0	3	FBgn0003886
FBgn0032422.3	0	-1.491667445	0.954	0.984	0	3	FBgn0032422
FBgn0003888.3	0	-1.768457027	0.97	0.993	0	3	FBgn0003888
FBgn0029903.2	7.58E-307	-1.043258057	0.757	0.897	1.52E-303	3	FBgn0029903
FBgn0261363.3	4.65E-306	-1.620183722	0.915	0.967	9.31E-303	3	FBgn0261363
FBgn0029932.3	7.55E-306	-1.117754788	0.803	0.905	1.51E-302	3	FBgn0029932
FBgn0010228.3	3.11E-305	0.690770878	0.955	0.911	6.21E-302	3	FBgn0010228
FBgn0000723.2	7.18E-305	-0.658189946	0.713	0.872	1.44E-301	3	FBgn0000723
FBgn0003218.3	8.90E-299	-1.060000047	0.782	0.899	1.78E-295	3	FBgn0003218
FBgn0259923.2	9.69E-299	-0.46045916	0.635	0.791	1.94E-295	3	FBgn0259923
FBgn0033033.2	1.16E-297	-0.75189947	0.69	0.811	2.32E-294	3	FBgn0033033
FBgn0000279.1	4.49E-295	-0.78075946	0.878	0.957	8.99E-292	3	FBgn0000279
FBgn0264895.2	8.36E-295	-1.012538105	0.912	0.966	1.67E-291	3	FBgn0264895
FBgn0037477.2	3.57E-290	-1.390492068	0.839	0.924	7.13E-287	3	FBgn0037477
FBgn0027657.3	1.32E-287	-0.674087828	0.695	0.834	2.64E-284	3	FBgn0027657
FBgn0038206.3	9.16E-286	-0.95220464	0.759	0.885	1.83E-282	3	FBgn0038206
FBgn0266253.3	4.06E-284	-1.400524141	0.898	0.966	8.12E-281	3	FBgn0266253
FBgn0053494.2	6.73E-280	-0.661097469	0.895	0.957	1.35E-276	3	FBgn0053494
FBgn0030396.3	5.75E-279	-1.612141128	0.816	0.928	1.15E-275	3	FBgn0030396
FBgn0266569.3	1.17E-277	-0.734349432	0.818	0.931	2.35E-274	3	FBgn0266569
FBgn0266186.2	1.61E-277	-0.611280901	0.807	0.94	3.22E-274	3	FBgn0266186
FBgn0262160.3	3.16E-277	-0.731777291	0.667	0.835	6.32E-274	3	FBgn0262160
FBgn0032731.2	5.77E-276	-0.635044882	0.887	0.965	1.15E-272	3	FBgn0032731
FBgn0041182.2	8.16E-276	-0.52785778	0.717	0.83	1.63E-272	3	FBgn0041182
FBgn0035498.2	1.61E-275	-1.092978633	0.908	0.956	3.22E-272	3	FBgn0035498
FBgn0261260.3	1.33E-273	-0.693228118	0.708	0.806	2.66E-270	3	FBgn0261260
FBgn0011824.1	2.95E-272	0.576029108	0.948	0.904	5.89E-269	3	FBgn0011824
FBgn0034219.3	5.42E-272	-1.001420036	0.855	0.943	1.08E-268	3	FBgn0034219
FBgn0003748.3	4.16E-271	-1.189739356	0.778	0.904	8.32E-268	3	FBgn0003748
FBgn0013733.2	3.53E-270	-1.354858081	0.87	0.935	7.06E-267	3	FBgn0013733
FBgn0033504.3	1.49E-269	-1.042627624	0.76	0.876	2.98E-266	3	FBgn0033504
FBgn0031090.2	1.05E-267	-0.635466649	0.77	0.91	2.11E-264	3	FBgn0031090
FBgn0031143.2	5.38E-266	-0.538782858	0.73	0.884	1.08E-262	3	FBgn0031143
FBgn0026602.2	6.37E-266	-0.763202382	0.71	0.844	1.27E-262	3	FBgn0026602
FBgn0050460.3	4.83E-265	-0.334090806	0.687	0.824	9.67E-262	3	FBgn0050460
FBgn0026196.1	3.55E-263	0.649810036	0.941	0.9	7.10E-260	3	FBgn0026196
FBgn0267795.2	1.55E-261	-0.46053461	0.957	0.989	3.10E-258	3	FBgn0267795
FBgn0027066.2	6.82E-261	-0.816892246	0.907	0.962	1.36E-257	3	FBgn0027066
FBgn0040206.2	3.39E-260	-0.583961308	0.725	0.868	6.79E-257	3	FBgn0040206
FBgn0020238.2	2.08E-259	-0.350670472	0.987	0.997	4.15E-256	3	FBgn0020238
FBgn0033926.2	7.89E-259	-0.705670515	0.998	0.999	1.58E-255	3	FBgn0033926
FBgn0036518.2	1.03E-258	-0.599778045	0.822	0.929	2.06E-255	3	FBgn0036518
FBgn0029506.2	2.50E-258	-0.742641389	0.856	0.948	5.00E-255	3	FBgn0029506
FBgn0038149.2	3.04E-254	-0.548642482	0.663	0.807	6.08E-251	3	FBgn0038149
FBgn0038682.2	3.11E-254	-1.401356463	0.839	0.916	6.22E-251	3	FBgn0038682
FBgn0003062.1	4.34E-253	0.60477516	0.941	0.88	8.67E-250	3	FBgn0003062
FBgn0046687.1	1.44E-252	-0.456332264	0.753	0.869	2.87E-249	3	FBgn0046687
FBgn0029507.3	2.40E-251	-0.888247721	0.875	0.946	4.80E-248	3	FBgn0029507
FBgn0037386.2	3.56E-249	-1.219842647	0.966	0.987	7.12E-246	3	FBgn0037386
FBgn0260746.3	7.36E-249	-0.39410714	0.519	0.748	1.47E-245	3	FBgn0260746
FBgn0015872.2	1.82E-248	-1.379016962	0.806	0.877	3.63E-245	3	FBgn0015872
FBgn0030040.3	2.18E-248	-1.412001613	0.976	0.987	4.36E-245	3	FBgn0030040
FBgn0034443.3	5.12E-246	-0.859130449	0.869	0.945	1.02E-242	3	FBgn0034443
FBgn0062413	1.04E-245	-0.381366878	0.64	0.804	2.08E-242	3	FBgn0062413
FBgn0028984.3	7.52E-245	-0.59899925	0.781	0.871	1.50E-241	3	FBgn0028984
FBgn0038679.3	1.49E-244	-0.580584308	0.71	0.819	2.97E-241	3	FBgn0038679
FBgn0261625	2.90E-244	0.255750684	0.872	0.831	5.79E-241	3	FBgn0261625
FBgn0002868.3	5.88E-244	-1.219782341	0.99	0.996	1.18E-240	3	FBgn0002868
FBgn0014141.3	3.36E-243	-0.87173988	0.944	0.976	6.71E-240	3	FBgn0014141
FBgn0003660.3	1.44E-242	-0.567808763	0.937	0.976	2.88E-239	3	FBgn0003660
FBgn0034894.2	1.94E-240	-0.708810605	0.703	0.848	3.88E-237	3	FBgn0034894
FBgn0034005.2	5.13E-237	-1.276608604	0.808	0.888	1.03E-233	3	FBgn0034005
FBgn0043841.1	1.01E-235	-0.616553369	0.704	0.867	2.01E-232	3	FBgn0043841
FBgn0034417.3	1.64E-235	-0.542191676	0.811	0.889	3.28E-232	3	FBgn0034417
FBgn0010246.2	3.08E-235	-0.538136254	0.908	0.976	6.16E-232	3	FBgn0010246
FBgn0013672.2	3.52E-235	0.296515588	0.999	0.998	7.05E-232	3	FBgn0013672
FBgn0034200.2	9.69E-235	-0.313011046	0.766	0.83	1.94E-231	3	FBgn0034200
FBgn0031307.3	6.94E-234	-0.638330418	0.712	0.856	1.39E-230	3	FBgn0031307
FBgn0033724.3	7.65E-234	-0.930466436	0.86	0.959	1.53E-230	3	FBgn0033724
FBgn0040299.3	7.82E-234	-0.512571598	0.642	0.772	1.56E-230	3	FBgn0040299
FBgn0036805.2	2.62E-233	-0.58002446	0.723	0.875	5.23E-230	3	FBgn0036805
FBgn0052066.3	3.48E-233	-0.543250202	0.733	0.89	6.95E-230	3	FBgn0052066
FBgn0050035.3	1.28E-232	-1.141620492	0.77	0.876	2.57E-229	3	FBgn0050035
FBgn0261458.2	1.09E-231	-0.563643796	0.92	0.978	2.18E-228	3	FBgn0261458
FBgn0035432.3	1.56E-230	-0.586044323	0.754	0.893	3.12E-227	3	FBgn0035432
FBgn0265140.2	4.26E-230	-0.683572578	0.85	0.935	8.52E-227	3	FBgn0265140
FBgn0266758.3	1.31E-228	-0.589060636	0.825	0.93	2.62E-225	3	FBgn0266758
FBgn0028546.2	2.27E-225	-0.568321496	0.759	0.876	4.54E-222	3	FBgn0028546
FBgn0042106.3	5.70E-223	-0.915671666	0.86	0.926	1.14E-219	3	FBgn0042106
FBgn0035623.2	1.41E-222	-0.600746845	0.911	0.979	2.81E-219	3	FBgn0035623
FBgn0002645.2	2.17E-221	-0.534735557	0.741	0.888	4.34E-218	3	FBgn0002645
FBgn0036742.2	3.64E-221	-0.913462383	0.794	0.881	7.29E-218	3	FBgn0036742
FBgn0010039.2	4.31E-220	-0.435459736	0.849	0.921	8.63E-217	3	FBgn0010039
FBgn0085442.3	5.30E-220	-0.536679611	0.703	0.849	1.06E-216	3	FBgn0085442
FBgn0036643.2	1.11E-219	-0.332013023	0.592	0.776	2.22E-216	3	FBgn0036643
FBgn0014163.3	1.95E-219	-1.151322941	0.849	0.932	3.90E-216	3	FBgn0014163
FBgn0031327.3	5.20E-219	-0.671501462	0.752	0.925	1.04E-215	3	FBgn0031327
FBgn0265991.3	6.24E-218	-0.689899834	0.675	0.814	1.25E-214	3	FBgn0265991
FBgn0002778.2	1.63E-215	0.449585554	0.898	0.864	3.26E-212	3	FBgn0002778
FBgn0266719.2	1.01E-214	-0.498620597	0.634	0.76	2.01E-211	3	FBgn0266719
FBgn0038320.1	1.12E-213	-0.318757095	0.695	0.847	2.23E-210	3	FBgn0038320
FBgn0015795.2	1.92E-213	-0.579907132	0.754	0.887	3.84E-210	3	FBgn0015795
FBgn0001961.2	1.30E-212	-0.478189033	0.898	0.962	2.60E-209	3	FBgn0001961
FBgn0026189.3	1.90E-212	-0.587083491	0.832	0.926	3.79E-209	3	FBgn0026189
FBgn0028427.2	4.08E-212	-0.649078606	0.786	0.889	8.16E-209	3	FBgn0028427
FBgn0262716.2	1.00E-211	-0.510247077	0.85	0.945	2.01E-208	3	FBgn0262716
FBgn0037548	1.10E-211	0.303874358	0.724	0.684	2.20E-208	3	FBgn0037548
FBgn0029148.1	1.72E-209	0.452033546	0.892	0.878	3.44E-206	3	FBgn0029148
FBgn0043070.3	1.32E-208	-0.726643092	0.781	0.894	2.64E-205	3	FBgn0043070
FBgn0036298.2	7.29E-208	-0.502795482	0.581	0.797	1.46E-204	3	FBgn0036298
FBgn0031470.2	1.47E-207	-0.274391676	0.685	0.792	2.95E-204	3	FBgn0031470
FBgn0032886.2	7.53E-207	-0.984903342	0.799	0.896	1.51E-203	3	FBgn0032886
FBgn0039759.3	8.59E-207	-0.704018021	0.795	0.878	1.72E-203	3	FBgn0039759
FBgn0262656.1	1.45E-206	0.563514757	0.88	0.789	2.90E-203	3	FBgn0262656
FBgn0003884.3	4.70E-206	-0.394300802	0.999	1	9.39E-203	3	FBgn0003884
FBgn0022709.2	1.15E-205	-0.691333817	0.746	0.816	2.30E-202	3	FBgn0022709
FBgn0040551.2	3.38E-205	-0.67114287	0.648	0.806	6.77E-202	3	FBgn0040551
FBgn0036663.3	1.12E-203	-0.53781894	0.657	0.78	2.24E-200	3	FBgn0036663
FBgn0000017.2	9.49E-203	-0.472985529	0.737	0.843	1.90E-199	3	FBgn0000017
FBgn0040099.2	2.33E-202	-0.701037521	0.684	0.883	4.66E-199	3	FBgn0040099
FBgn0022069.1	2.50E-202	0.291057508	0.848	0.824	5.01E-199	3	FBgn0022069
FBgn0031213.3	3.91E-202	-0.656980818	0.76	0.86	7.81E-199	3	FBgn0031213
FBgn0012051.2	7.87E-201	-0.533574646	0.715	0.842	1.57E-197	3	FBgn0012051
FBgn0047178.3	1.24E-200	-0.556153108	0.622	0.793	2.48E-197	3	FBgn0047178
FBgn0038088.3	2.90E-200	-0.722252716	0.777	0.843	5.80E-197	3	FBgn0038088
FBgn0001258.2	1.80E-198	-0.722127986	0.819	0.884	3.60E-195	3	FBgn0001258
FBgn0052446.1	1.14E-197	-0.333049091	0.629	0.801	2.29E-194	3	FBgn0052446
FBgn0015765.2	1.87E-197	-0.59685593	0.649	0.804	3.74E-194	3	FBgn0015765
FBgn0035879.2	3.75E-197	-0.425700681	0.616	0.778	7.50E-194	3	FBgn0035879
FBgn0004652.1	4.87E-197	0.397640781	0.764	0.707	9.74E-194	3	FBgn0004652
FBgn0000318.3	3.63E-196	-0.588222851	0.899	0.966	7.26E-193	3	FBgn0000318
FBgn0267727.3	2.77E-194	0.500792478	0.905	0.842	5.53E-191	3	FBgn0267727
FBgn0250837.3	1.32E-193	0.540336006	0.912	0.879	2.64E-190	3	FBgn0250837
FBgn0026374.2	1.78E-193	-0.584913606	0.567	0.76	3.56E-190	3	FBgn0026374
FBgn0031080.3	4.18E-193	-0.609175002	0.678	0.804	8.35E-190	3	FBgn0031080
FBgn0038890.3	7.49E-193	-0.656108917	0.793	0.862	1.50E-189	3	FBgn0038890
FBgn0020510.2	1.72E-191	-0.407546434	0.763	0.859	3.43E-188	3	FBgn0020510
FBgn0053459	2.08E-191	0.307242021	0.722	0.711	4.16E-188	3	FBgn0053459
FBgn0040285.2	2.49E-191	-0.518157523	0.888	0.951	4.97E-188	3	FBgn0040285
FBgn0031453.3	3.78E-191	0.461211071	0.967	0.958	7.56E-188	3	FBgn0031453
FBgn0003206.2	1.30E-190	-0.473934951	0.54	0.736	2.59E-187	3	FBgn0003206
FBgn0004397.2	4.29E-189	-0.728700295	0.74	0.839	8.58E-186	3	FBgn0004397
FBgn0052638.1	1.88E-188	-0.250893424	0.635	0.799	3.76E-185	3	FBgn0052638
FBgn0010395.2	2.70E-187	-0.537659982	0.704	0.811	5.40E-184	3	FBgn0010395
FBgn0032857.2	7.80E-187	-0.469005862	0.745	0.81	1.56E-183	3	FBgn0032857
FBgn0013718.2	1.52E-186	-0.47117508	0.754	0.84	3.05E-183	3	FBgn0013718
FBgn0003447.3	5.15E-185	-0.718122353	0.634	0.751	1.03E-181	3	FBgn0003447
FBgn0040237.1	9.13E-185	0.371862621	0.829	0.778	1.83E-181	3	FBgn0040237
FBgn0051092.2	2.56E-183	-0.569763683	0.777	0.84	5.12E-180	3	FBgn0051092
FBgn0051195.1	1.12E-182	-0.264549478	0.719	0.79	2.24E-179	3	FBgn0051195
FBgn0266417.3	2.12E-182	-0.597513319	0.601	0.774	4.23E-179	3	FBgn0266417
FBgn0032421.1	4.08E-182	-0.278150176	0.576	0.771	8.16E-179	3	FBgn0032421
FBgn0034638.3	4.67E-181	-0.422042491	0.756	0.869	9.34E-178	3	FBgn0034638
FBgn0262794.2	2.10E-180	-0.685945767	0.881	0.967	4.21E-177	3	FBgn0262794
FBgn0014133.2	1.47E-179	-0.502510059	0.849	0.929	2.94E-176	3	FBgn0014133
FBgn0004574.2	2.62E-179	-0.413371076	0.694	0.841	5.24E-176	3	FBgn0004574
FBgn0045852.3	8.72E-179	0.499365819	0.894	0.803	1.74E-175	3	FBgn0045852
FBgn0259228.3	3.64E-177	-0.64133364	0.795	0.887	7.28E-174	3	FBgn0259228
FBgn0033756.3	4.59E-176	-0.535703788	0.793	0.891	9.19E-173	3	FBgn0033756
FBgn0267033.2	5.80E-175	0.603198579	0.758	0.696	1.16E-171	3	FBgn0267033
FBgn0028490.3	8.00E-175	-0.561846615	0.682	0.832	1.60E-171	3	FBgn0028490
FBgn0024150.3	1.60E-174	-0.617527226	0.684	0.82	3.19E-171	3	FBgn0024150
FBgn0013678.1	2.81E-174	0.250050271	0.999	0.997	5.61E-171	3	FBgn0013678
FBgn0033438.1	1.15E-173	-0.470033645	0.706	0.83	2.30E-170	3	FBgn0033438
FBgn0041789.2	2.62E-173	-0.496369015	0.824	0.915	5.24E-170	3	FBgn0041789
FBgn0003514.2	6.51E-173	-0.464422799	0.89	0.956	1.30E-169	3	FBgn0003514
FBgn0015286.2	1.96E-171	-0.42637184	0.789	0.886	3.93E-168	3	FBgn0015286
FBgn0261244.3	3.27E-171	-0.453516954	0.723	0.824	6.55E-168	3	FBgn0261244
FBgn0063494.1	5.97E-171	-0.38505067	0.781	0.893	1.19E-167	3	FBgn0063494
FBgn0262582.2	2.51E-170	-0.557299895	0.59	0.768	5.01E-167	3	FBgn0262582
FBgn0001149.3	1.20E-169	-0.633324179	0.962	0.988	2.40E-166	3	FBgn0001149
FBgn0267487.2	8.80E-169	-0.407365739	0.698	0.811	1.76E-165	3	FBgn0267487
FBgn0032036.2	2.67E-167	-0.49864157	0.792	0.847	5.33E-164	3	FBgn0032036
FBgn0259740.3	5.97E-167	0.314200158	0.994	0.989	1.19E-163	3	FBgn0259740
FBgn0032400.3	1.14E-166	-0.790170792	0.749	0.849	2.28E-163	3	FBgn0032400
FBgn0037465.2	2.28E-166	-0.325792061	0.534	0.727	4.57E-163	3	FBgn0037465
FBgn0038299	2.71E-166	-0.39473227	0.793	0.899	5.42E-163	3	FBgn0038299
FBgn0035763.1	2.98E-166	-0.376137234	0.577	0.765	5.96E-163	3	FBgn0035763
FBgn0052528.2	7.91E-166	-0.44614539	0.674	0.791	1.58E-162	3	FBgn0052528
FBgn0015776	4.83E-165	-0.293762941	0.673	0.792	9.66E-162	3	FBgn0015776
FBgn0028671.1	1.31E-163	-0.32655338	0.68	0.806	2.63E-160	3	FBgn0028671
FBgn0030286.2	1.45E-162	-0.279135967	0.661	0.759	2.90E-159	3	FBgn0030286
FBgn0085452.3	4.08E-162	-0.670041624	0.801	0.895	8.17E-159	3	FBgn0085452
FBgn0035715.2	1.47E-161	-0.310452055	0.606	0.772	2.95E-158	3	FBgn0035715
FBgn0261570.2	2.10E-161	-0.373474729	0.671	0.798	4.21E-158	3	FBgn0261570
FBgn0003890.2	2.88E-161	-0.718267532	0.83	0.904	5.75E-158	3	FBgn0003890
FBgn0037750.2	6.28E-161	-0.34231487	0.608	0.74	1.26E-157	3	FBgn0037750
FBgn0010397.3	7.74E-161	-0.659168863	0.851	0.91	1.55E-157	3	FBgn0010397
FBgn0267849.2	4.82E-160	-0.334500708	0.663	0.777	9.64E-157	3	FBgn0267849
FBgn0014029.2	1.07E-158	-0.471314278	0.785	0.88	2.15E-155	3	FBgn0014029
FBgn0037720.3	1.33E-158	-0.596261849	0.675	0.797	2.65E-155	3	FBgn0037720
FBgn0003205.2	1.35E-158	-0.470125604	0.836	0.912	2.71E-155	3	FBgn0003205
FBgn0014388.3	5.27E-157	0.395710155	0.944	0.887	1.05E-153	3	FBgn0014388
FBgn0036877.2	2.27E-156	-0.318456758	0.561	0.719	4.53E-153	3	FBgn0036877
FBgn0020416.2	4.07E-156	-0.303956766	0.525	0.762	8.13E-153	3	FBgn0020416
FBgn0000273.2	5.29E-156	-0.374647402	0.544	0.73	1.06E-152	3	FBgn0000273
FBgn0035452.1	1.17E-154	-0.303729679	0.732	0.78	2.33E-151	3	FBgn0035452
FBgn0259481.3	2.56E-154	-0.517730494	0.668	0.806	5.12E-151	3	FBgn0259481
FBgn0020304.3	5.68E-154	-0.53961357	0.596	0.753	1.14E-150	3	FBgn0020304
FBgn0004167.3	5.08E-153	0.35606635	0.942	0.892	1.02E-149	3	FBgn0004167
FBgn0010424.3	8.27E-153	-1.122466324	0.829	0.887	1.65E-149	3	FBgn0010424
FBgn0285910.2	3.00E-152	-0.339376845	0.782	0.896	5.99E-149	3	FBgn0285910
FBgn0264894.3	3.53E-152	-0.39913786	0.696	0.787	7.06E-149	3	FBgn0264894
FBgn0031547.2	3.48E-151	-0.565212495	0.844	0.935	6.97E-148	3	FBgn0031547
FBgn0013272.2	9.02E-151	-0.309779134	0.636	0.751	1.80E-147	3	FBgn0013272
FBgn0039108.2	1.52E-150	-0.486335447	0.706	0.763	3.03E-147	3	FBgn0039108
FBgn0003093.3	1.58E-150	-0.538012973	0.614	0.76	3.16E-147	3	FBgn0003093
FBgn0001941.3	2.66E-150	-0.499687214	0.874	0.932	5.31E-147	3	FBgn0001941
FBgn0032191.2	8.20E-150	-0.537682489	0.784	0.874	1.64E-146	3	FBgn0032191
FBgn0011703.1	2.84E-148	0.282781893	0.851	0.824	5.67E-145	3	FBgn0011703
FBgn0015222.2	7.98E-148	-0.410162706	0.891	0.959	1.60E-144	3	FBgn0015222
FBgn0001104.2	9.84E-148	-0.405386762	0.839	0.915	1.97E-144	3	FBgn0001104
FBgn0030160.3	1.11E-146	-0.272984541	0.783	0.854	2.21E-143	3	FBgn0030160
FBgn0036053.2	1.82E-145	-0.352774531	0.692	0.826	3.64E-142	3	FBgn0036053
FBgn0032499.2	3.09E-145	-0.391539672	0.679	0.786	6.17E-142	3	FBgn0032499
FBgn0040395.2	4.44E-145	-0.320325324	0.597	0.732	8.89E-142	3	FBgn0040395
FBgn0037647.1	2.13E-144	-0.310935963	0.689	0.809	4.27E-141	3	FBgn0037647
FBgn0030412.3	1.46E-143	-0.522144383	0.597	0.738	2.91E-140	3	FBgn0030412
FBgn0262699.3	6.43E-143	-0.521893925	0.734	0.844	1.29E-139	3	FBgn0262699
FBgn0015589.2	7.02E-143	-0.596588052	0.744	0.829	1.40E-139	3	FBgn0015589
FBgn0034997	1.27E-142	0.447528527	0.779	0.765	2.53E-139	3	FBgn0034997
FBgn0038243.3	7.11E-142	-0.382409438	0.692	0.787	1.42E-138	3	FBgn0038243
FBgn0267252.3	4.67E-141	-0.44719419	0.765	0.863	9.34E-138	3	FBgn0267252
FBgn0029095.2	1.25E-140	-0.450227779	0.835	0.919	2.49E-137	3	FBgn0029095
FBgn0026160.2	4.63E-140	-0.283546551	0.384	0.643	9.27E-137	3	FBgn0026160
FBgn0263077.3	1.93E-139	-0.526324821	0.592	0.743	3.85E-136	3	FBgn0263077
FBgn0259221.3	1.29E-137	-0.486272181	0.658	0.755	2.57E-134	3	FBgn0259221
FBgn0028663.2	1.34E-137	-0.380469128	0.879	0.953	2.69E-134	3	FBgn0028663
FBgn0027509.2	2.51E-137	-0.280398298	0.584	0.763	5.02E-134	3	FBgn0027509
FBgn0000636.2	3.12E-137	-0.341228851	0.605	0.734	6.23E-134	3	FBgn0000636
FBgn0002719.2	6.05E-137	-0.555311745	0.852	0.916	1.21E-133	3	FBgn0002719
FBgn0030670.2	1.94E-136	-0.449623263	0.697	0.803	3.88E-133	3	FBgn0030670
FBgn0030114.1	6.94E-136	-0.280345904	0.531	0.695	1.39E-132	3	FBgn0030114
FBgn0050115.3	2.66E-135	-0.531087286	0.544	0.683	5.32E-132	3	FBgn0050115
FBgn0000276.1	3.28E-135	-0.328871325	0.829	0.886	6.55E-132	3	FBgn0000276
FBgn0086370.2	3.69E-135	-0.335087688	0.757	0.83	7.39E-132	3	FBgn0086370
FBgn0036318.2	6.67E-135	-0.354610563	0.626	0.796	1.33E-131	3	FBgn0036318
FBgn0261261.2	1.82E-134	-0.576740253	0.764	0.813	3.65E-131	3	FBgn0261261
FBgn0261545.2	1.06E-133	-0.424992005	0.486	0.658	2.13E-130	3	FBgn0261545
FBgn0259977.3	3.82E-132	-0.541800803	0.706	0.746	7.64E-129	3	FBgn0259977
FBgn0086355.2	3.98E-131	-0.529639209	0.746	0.871	7.95E-128	3	FBgn0086355
FBgn0261988.3	1.75E-130	-0.507243206	0.725	0.83	3.51E-127	3	FBgn0261988
FBgn0086532	8.16E-130	-0.302439397	0.813	0.888	1.63E-126	3	FBgn0086532
FBgn0004569.2	6.16E-129	-0.508180713	0.775	0.822	1.23E-125	3	FBgn0004569
FBgn0034691.1	1.45E-128	-0.263456407	0.695	0.766	2.90E-125	3	FBgn0034691
FBgn0040398.1	1.67E-128	-0.265389306	0.996	0.999	3.33E-125	3	FBgn0040398
FBgn0015790.3	9.31E-128	-0.41627659	0.892	0.953	1.86E-124	3	FBgn0015790
FBgn0259243.2	1.32E-127	-0.367157206	0.676	0.799	2.64E-124	3	FBgn0259243
FBgn0037228.3	1.85E-127	-0.31799766	0.538	0.789	3.71E-124	3	FBgn0037228
FBgn0013763.3	1.30E-126	0.321433577	0.917	0.907	2.61E-123	3	FBgn0013763
FBgn0014009.2	1.84E-126	-0.395214886	0.768	0.871	3.68E-123	3	FBgn0014009
FBgn0026479.2	1.87E-126	-0.263173705	0.732	0.83	3.75E-123	3	FBgn0026479
FBgn0053056.2	2.71E-126	-0.711780811	0.721	0.773	5.42E-123	3	FBgn0053056
FBgn0020249.3	4.24E-126	-0.468199413	0.76	0.841	8.48E-123	3	FBgn0020249
FBgn0261561.2	8.51E-126	-0.852336094	0.779	0.835	1.70E-122	3	FBgn0261561
FBgn0045073.2	1.24E-125	-0.351779391	0.712	0.81	2.48E-122	3	FBgn0045073
FBgn0261108.1	8.25E-125	-0.26921497	0.569	0.703	1.65E-121	3	FBgn0261108
FBgn0001122.1	8.46E-125	-0.283524777	0.798	0.862	1.69E-121	3	FBgn0001122
FBgn0053111.3	2.84E-124	-0.387387029	0.61	0.721	5.68E-121	3	FBgn0053111
FBgn0037956.2	3.90E-124	-0.290835893	0.526	0.666	7.80E-121	3	FBgn0037956
FBgn0250868.1	3.08E-123	-0.267564423	0.706	0.834	6.15E-120	3	FBgn0250868
FBgn0001624.2	2.09E-122	-0.383210659	0.684	0.797	4.17E-119	3	FBgn0001624
FBgn0030090.1	7.51E-122	-0.313539518	0.669	0.748	1.50E-118	3	FBgn0030090
FBgn0265375.3	2.21E-121	-0.719205773	0.816	0.89	4.43E-118	3	FBgn0265375
FBgn0283712.2	6.97E-121	-0.432591943	0.638	0.717	1.39E-117	3	FBgn0283712
FBgn0015221.2	7.72E-121	-0.383048304	0.883	0.962	1.54E-117	3	FBgn0015221
FBgn0033635.3	8.17E-120	-0.586781404	0.916	0.966	1.63E-116	3	FBgn0033635
FBgn0034970.2	5.10E-119	-0.2833224	0.683	0.807	1.02E-115	3	FBgn0034970
FBgn0286071.2	7.45E-119	-0.359609104	0.766	0.812	1.49E-115	3	FBgn0286071
FBgn0264693.2	1.16E-116	-0.432379916	0.773	0.86	2.32E-113	3	FBgn0264693
FBgn0035603.3	1.75E-116	-0.392478187	0.88	0.937	3.49E-113	3	FBgn0035603
FBgn0031457.2	7.74E-116	-0.518885362	0.687	0.776	1.55E-112	3	FBgn0031457
FBgn0069923.2	8.56E-116	0.454133395	0.887	0.829	1.71E-112	3	FBgn0069923
FBgn0001092.3	1.78E-111	-0.800329606	0.906	0.956	3.56E-108	3	FBgn0001092
FBgn0035142.1	8.04E-111	-0.322682084	0.508	0.71	1.61E-107	3	FBgn0035142
FBgn0261385.3	1.16E-110	0.26168913	0.767	0.715	2.33E-107	3	FBgn0261385
FBgn0038197	1.46E-110	-0.253845328	0.563	0.68	2.92E-107	3	FBgn0038197
FBgn0038037.2	7.04E-110	-0.33063161	0.649	0.738	1.41E-106	3	FBgn0038037
FBgn0052594.2	1.09E-109	-0.349887747	0.516	0.656	2.19E-106	3	FBgn0052594
FBgn0034720.3	2.59E-109	-0.36166287	0.751	0.774	5.19E-106	3	FBgn0034720
FBgn0040064.2	1.46E-108	-0.254769141	0.665	0.827	2.92E-105	3	FBgn0040064
FBgn0037843.3	2.17E-107	-0.330566151	0.801	0.9	4.34E-104	3	FBgn0037843
FBgn0263380.3	2.69E-107	-0.954356494	0.837	0.885	5.38E-104	3	FBgn0263380
FBgn0283666.1	1.48E-106	-0.262442117	0.723	0.797	2.96E-103	3	FBgn0283666
FBgn0004921.1	5.67E-106	-0.256510371	0.93	0.977	1.13E-102	3	FBgn0004921
FBgn0001987.3	8.58E-106	-0.578102434	0.737	0.773	1.72E-102	3	FBgn0001987
FBgn0086254.3	2.03E-105	0.297519003	0.872	0.872	4.07E-102	3	FBgn0086254
FBgn0034408	1.36E-104	-0.461230387	0.813	0.847	2.73E-101	3	FBgn0034408
FBgn0026315.3	2.59E-103	-0.324343131	0.633	0.763	5.19E-100	3	FBgn0026315
FBgn0035539.2	2.69E-103	-0.36795058	0.578	0.664	5.38E-100	3	FBgn0035539
FBgn0085354.3	2.00E-101	-0.374130169	0.766	0.841	4.01E-98	3	FBgn0085354
FBgn0033309.3	2.32E-101	-0.361508203	0.686	0.784	4.64E-98	3	FBgn0033309
FBgn0039844.3	7.24E-101	-0.700864368	0.779	0.871	1.45E-97	3	FBgn0039844
FBgn0267505.2	8.44E-101	0.445619354	0.906	0.871	1.69E-97	3	FBgn0267505
FBgn0005278.3	1.09E-100	0.332545433	0.897	0.829	2.18E-97	3	FBgn0005278
FBgn0010909.3	7.88E-100	-0.375856599	0.788	0.861	1.58E-96	3	FBgn0010909
FBgn0029131.3	1.75E-98	-0.428367534	0.786	0.861	3.49E-95	3	FBgn0029131
FBgn0011747.1	6.42E-98	-0.290351786	0.705	0.823	1.28E-94	3	FBgn0011747
FBgn0002773.2	8.34E-98	-0.283228189	0.813	0.873	1.67E-94	3	FBgn0002773
FBgn0028916.2	7.54E-97	-0.614277796	0.797	0.868	1.51E-93	3	FBgn0028916
FBgn0035964.3	5.68E-96	-0.403801214	0.782	0.844	1.14E-92	3	FBgn0035964
FBgn0016059.2	5.93E-96	-0.345847591	0.673	0.756	1.19E-92	3	FBgn0016059
FBgn0032010.3	3.56E-95	-0.336778503	0.762	0.758	7.12E-92	3	FBgn0032010
FBgn0267336	6.33E-95	-0.26792952	0.496	0.657	1.27E-91	3	FBgn0267336
FBgn0027580.2	1.08E-94	-0.279020472	0.814	0.853	2.16E-91	3	FBgn0027580
FBgn0045823.3	1.37E-94	-0.396709908	0.892	0.961	2.75E-91	3	FBgn0045823
FBgn0264815.3	2.26E-94	-0.527186255	0.564	0.711	4.53E-91	3	FBgn0264815
FBgn0263118.3	4.64E-94	-0.456407003	0.757	0.847	9.27E-91	3	FBgn0263118
FBgn0029896.3	4.90E-94	-0.327803657	0.809	0.85	9.80E-91	3	FBgn0029896
FBgn0041188.2	7.02E-94	-0.326753144	0.829	0.902	1.40E-90	3	FBgn0041188
FBgn0086372.2	2.53E-93	-0.33337473	0.649	0.744	5.06E-90	3	FBgn0086372
FBgn0004106.1	3.97E-93	0.279748639	0.757	0.741	7.94E-90	3	FBgn0004106
FBgn0033725.3	8.64E-93	-0.338278141	0.724	0.839	1.73E-89	3	FBgn0033725
FBgn0010051.2	9.96E-93	-0.322632496	0.652	0.742	1.99E-89	3	FBgn0010051
FBgn0086558.2	1.18E-92	-0.2853761	0.794	0.893	2.36E-89	3	FBgn0086558
FBgn0035076.3	4.02E-92	-0.307881108	0.475	0.71	8.04E-89	3	FBgn0035076
FBgn0031150.3	4.61E-92	-0.557712096	0.757	0.771	9.22E-89	3	FBgn0031150
FBgn0029737.1	4.97E-92	-0.294002087	0.688	0.749	9.94E-89	3	FBgn0029737
FBgn0014869.3	9.93E-92	-0.352659795	0.785	0.864	1.99E-88	3	FBgn0014869
FBgn0035497.2	3.60E-90	-0.290459924	0.56	0.664	7.19E-87	3	FBgn0035497
FBgn0020251.3	1.29E-89	-0.437141481	0.674	0.772	2.58E-86	3	FBgn0020251
FBgn0025815.1	1.44E-89	0.259192912	0.746	0.715	2.87E-86	3	FBgn0025815
FBgn0259896.3	3.40E-89	-0.566734761	0.751	0.876	6.81E-86	3	FBgn0259896
FBgn0001233.1	5.94E-88	0.310721329	0.978	0.96	1.19E-84	3	FBgn0001233
FBgn0031791.3	9.06E-87	-0.727466984	0.817	0.886	1.81E-83	3	FBgn0031791
FBgn0001091.3	2.15E-86	-0.384336689	0.795	0.895	4.31E-83	3	FBgn0001091
FBgn0005655.2	1.93E-85	0.322205332	0.862	0.85	3.86E-82	3	FBgn0005655
FBgn0026721.3	8.04E-85	-0.423709331	0.621	0.775	1.61E-81	3	FBgn0026721
FBgn0052412.3	1.49E-84	-0.53637817	0.765	0.815	2.99E-81	3	FBgn0052412
FBgn0010406.2	8.18E-83	-0.317687486	0.721	0.771	1.64E-79	3	FBgn0010406
FBgn0030234.3	6.74E-82	0.348490352	0.871	0.87	1.35E-78	3	FBgn0030234
FBgn0003525.3	1.23E-81	0.300088091	0.793	0.798	2.47E-78	3	FBgn0003525
FBgn0011666.2	5.57E-81	-0.256442067	0.652	0.815	1.11E-77	3	FBgn0011666
FBgn0039776.3	7.75E-81	-0.284370042	0.724	0.9	1.55E-77	3	FBgn0039776
FBgn0019968.3	9.08E-81	-0.440682554	0.681	0.742	1.82E-77	3	FBgn0019968
FBgn0016672.3	9.30E-81	-0.516679713	0.765	0.829	1.86E-77	3	FBgn0016672
FBgn0030241.3	3.48E-80	0.27432905	0.795	0.797	6.96E-77	3	FBgn0030241
FBgn0025628.3	3.03E-79	-0.385893059	0.664	0.75	6.06E-76	3	FBgn0025628
FBgn0036341.3	4.88E-79	-0.413469381	0.762	0.807	9.75E-76	3	FBgn0036341
FBgn0034880.2	5.43E-79	-0.411431154	0.714	0.777	1.09E-75	3	FBgn0034880
FBgn0283461.3	2.05E-78	-0.56204361	0.843	0.902	4.10E-75	3	FBgn0283461
FBgn0013765.1	1.04E-77	-0.278056892	0.675	0.729	2.08E-74	3	FBgn0013765
FBgn0036752.3	7.73E-77	-0.513422684	0.831	0.858	1.55E-73	3	FBgn0036752
FBgn0032156.2	4.13E-75	-0.295258031	0.613	0.685	8.26E-72	3	FBgn0032156
FBgn0015924.2	8.44E-75	-0.295660965	0.506	0.637	1.69E-71	3	FBgn0015924
FBgn0259178.2	9.25E-75	-0.262089845	0.652	0.722	1.85E-71	3	FBgn0259178
FBgn0033446.3	1.45E-74	-0.604746988	0.913	0.955	2.90E-71	3	FBgn0033446
FBgn0041585.3	3.03E-74	-0.296811727	0.678	0.764	6.07E-71	3	FBgn0041585
FBgn0033032.2	5.43E-74	-0.432704766	0.818	0.863	1.09E-70	3	FBgn0033032
FBgn0263773.2	1.54E-73	-0.396611052	0.324	0.51	3.09E-70	3	FBgn0263773
FBgn0050015.1	1.65E-73	-0.286757126	0.781	0.817	3.30E-70	3	FBgn0050015
FBgn0035896.2	2.21E-73	-0.255715709	0.755	0.81	4.41E-70	3	FBgn0035896
FBgn0033649.2	2.92E-72	-0.317204461	0.748	0.744	5.84E-69	3	FBgn0033649
FBgn0017581.2	6.07E-72	-0.325028762	0.741	0.843	1.21E-68	3	FBgn0017581
FBgn0014865.2	6.47E-72	-0.347422252	0.757	0.817	1.29E-68	3	FBgn0014865
FBgn0261565.2	7.02E-72	-0.396666331	0.651	0.732	1.40E-68	3	FBgn0261565
FBgn0033448.3	1.37E-71	-0.8222915	0.861	0.926	2.75E-68	3	FBgn0033448
FBgn0053329.2	1.56E-70	-0.291715373	0.784	0.757	3.12E-67	3	FBgn0053329
FBgn0026079.1	1.67E-70	0.254008682	0.813	0.826	3.34E-67	3	FBgn0026079
FBgn0037248.1	3.33E-70	0.26441861	0.775	0.782	6.67E-67	3	FBgn0037248
FBgn0085359.3	4.21E-70	-0.819190781	0.811	0.856	8.43E-67	3	FBgn0085359
FBgn0032897.3	1.49E-69	-0.817360347	0.835	0.889	2.98E-66	3	FBgn0032897
[truncated: 2,896 more rows]
