# Supplementary material for: Constitutive activation of cellular immunity underlies the evolution of resistance to infection in Drosophila
Source: eLife. 2020 Dec 24;9:e59095. doi: 10.7554/eLife.59095 (PMC7785293; doi:10.7554/eLife.59095)
Supplement: Supplementary file 10. [file elife-59095-supp10.csv]

Cluster identity	CC-0	CC-1	CC-2	CC-3	CC-4	CC-5	CC-6	CC-7	CC-8
PLASM1	5340	50	83	143	67	36	0	1	1
PLASM2	255	12	2593	12	0	0	2	0	0
CC	80	12	1	1	5	2	805	0	0
MET	17	0	0	0	0	0	0	266	0
AMP	17	0	0	0	1	0	0	0	178
LAM1	270	47	0	1	942	0	0	0	0
LAM2	47	3894	267	10	187	698	0	0	1
LAM3	13	20	0	1976	267	723	0	0	1
CC: Cell cycle effects corrected
