# Supplementary material for: Constitutive activation of cellular immunity underlies the evolution of resistance to infection in Drosophila
Source: eLife. 2020 Dec 24;9:e59095. doi: 10.7554/eLife.59095 (PMC7785293; doi:10.7554/eLife.59095)
Supplement: Supplementary file 11. [file elife-59095-supp11.csv]

Cluster identity	0	1	2	3	4	5	6	7	8	9	10
PLASM1	4821	41	159	291	42	188	13	100	11	55	0
PLASM2	362	109	3	2338	0	7	7	2	1	45	0
CC	77	14	2	23	6	4	776	3	0	1	0
MET	32	0	0	5	0	1	0	245	0	0	0
AMP	61	6	1	5	1	15	0	1	105	1	0
LAM1	145	75	3	7	7	1015	0	6	2	0	0
LAM2	43	2886	127	100	1758	186	0	1	1	0	2
LAM3	6	3	2649	1	110	175	0	1	0	1	54
