# Supplementary material for: Constitutive activation of cellular immunity underlies the evolution of resistance to infection in Drosophila
Source: eLife. 2020 Dec 24;9:e59095. doi: 10.7554/eLife.59095 (PMC7785293; doi:10.7554/eLife.59095)
Supplement: Supplementary file 13. [file elife-59095-supp13.csv]

P value	log(e) fold change in expression in cluster of interest compared to all other clusters	percent of cells expressing genes in cluster of interest	percent of cells expressing genes in all other clusters	Adjusted P value	cluster	gene	symbol
0	1.464968417	0.963	0.87	0	PLASM1	FBgn0014163	fax
0	1.439627609	0.992	0.852	0	PLASM1	FBgn0033724	CG8501
0	1.218974127	0.964	0.846	0	PLASM1	FBgn0042106	CG18754
0	1.134553575	0.988	0.89	0	PLASM1	FBgn0029167	Hml
0	1.095824433	0.995	0.951	0	PLASM1	FBgn0034761	CG4250
0	1.091217316	0.956	0.852	0	PLASM1	FBgn0266569	CG42259
0	1.086508214	0.947	0.746	0	PLASM1	FBgn0001114	Glt
0	1.052428379	0.944	0.736	0	PLASM1	FBgn0259896	NimC1
0	1.046608804	0.992	0.896	0	PLASM1	FBgn0013770	Cp1
0	0.99524153	0.976	0.872	0	PLASM1	FBgn0029506	Tsp42Ee
0	0.942754509	0.975	0.875	0	PLASM1	FBgn0265140	Meltrin
0	0.865085249	0.855	0.579	0	PLASM1	FBgn0026721	fat-spondin
0	0.861279118	0.891	0.813	0	PLASM1	FBgn0051092	LpR2
0	0.840544339	0.967	0.889	0	PLASM1	FBgn0011828	Pxn
0	0.816042045	0.946	0.751	0	PLASM1	FBgn0031327	CG5397
0	0.805877237	0.983	0.905	0	PLASM1	FBgn0026562	SPARC
0	0.799320532	0.918	0.789	0	PLASM1	FBgn0030796	CG4829
0	0.796083442	0.986	0.89	0	PLASM1	FBgn0045823	vsg
0	0.794136124	0.961	0.897	0	PLASM1	FBgn0000299	Col4a1
0	0.787257051	0.911	0.659	0	PLASM1	FBgn0029147	NtR
0	0.777898424	0.997	0.982	0	PLASM1	FBgn0003137	Ppn
0	0.732839702	0.855	0.538	0	PLASM1	FBgn0004449	Ten-m
0	0.723016996	0.96	0.874	0	PLASM1	FBgn0020415	Idgf2
0	0.703480868	0.957	0.825	0	PLASM1	FBgn0261800	LanB1
0	0.674343278	0.976	0.881	0	PLASM1	FBgn0051324	CG31324
0	0.347246911	1	1	0	PLASM1	FBgn0267910	MRE16
1.81861742399241e-313	0.724283672	0.947	0.784	3.63723484798482e-310	PLASM1	FBgn0002526	LanA
0.00E+00	0.671331583	0.905	0.696	2.19E-306	PLASM1	FBgn0029092	ced-6
2.94E-304	0.682978993	0.858	0.635	5.88E-301	PLASM1	FBgn0261628	CG42711
3.60E-301	0.770824659	0.917	0.695	7.21E-298	PLASM1	FBgn0040099	lectin-28C
2.83E-298	0.643379701	0.956	0.783	5.65E-295	PLASM1	FBgn0031261	nAChRbeta3
8.07E-296	0.691827811	0.84	0.564	1.61E-292	PLASM1	FBgn0033949	CG10131
2.18E-294	0.548712742	0.924	0.791	4.35E-291	PLASM1	FBgn0031913	CG5958
8.39E-282	0.619700574	0.971	0.883	1.68E-278	PLASM1	FBgn0015221	Fer2LCH
6.89E-276	0.627427262	0.955	0.784	1.38E-272	PLASM1	FBgn0267348	LanB2
7.03E-276	0.717533241	0.97	0.892	1.41E-272	PLASM1	FBgn0262794	CG43175
3.97E-274	0.571057897	0.901	0.646	7.94E-271	PLASM1	FBgn0033777	CG17574
2.41E-264	0.574511611	0.795	0.465	4.81E-261	PLASM1	FBgn0020416	Idgf1
5.10E-259	0.487602473	0.916	0.813	1.02E-255	PLASM1	FBgn0264343	CG43799
5.32E-258	0.513962995	0.878	0.757	1.06E-254	PLASM1	FBgn0032638	SPH93
1.85E-256	0.594709799	0.94	0.735	3.71E-253	PLASM1	FBgn0039776	PH4alphaEFB
3.89E-256	0.536747275	0.847	0.722	7.79E-253	PLASM1	FBgn0034880	ItgaPS5
4.38E-256	0.592671256	0.86	0.582	8.76E-253	PLASM1	FBgn0037228	CG1092
1.57E-250	0.54890227	0.967	0.9	3.14E-247	PLASM1	FBgn0015222	Fer1HCH
3.48E-250	0.617862924	0.855	0.651	6.96E-247	PLASM1	FBgn0033438	Mmp2
5.56E-243	0.587550475	0.991	0.957	1.11E-239	PLASM1	FBgn0026084	cib
8.89E-240	0.687441451	0.851	0.637	1.78E-236	PLASM1	FBgn0033725	Cpr49Ac
1.01E-234	0.627699185	0.855	0.704	2.02E-231	PLASM1	FBgn0043841	vir-1
2.27E-231	0.644883719	0.913	0.867	4.53E-228	PLASM1	FBgn0283461	Drs
6.42E-230	0.42225656	0.855	0.684	1.28E-226	PLASM1	FBgn0016930	Dyrk2
1.36E-228	0.542651172	0.941	0.799	2.71E-225	PLASM1	FBgn0029093	cathD
4.36E-226	0.639810113	0.92	0.88	8.73E-223	PLASM1	FBgn0265413	CG44325
1.92E-223	0.46087429	0.754	0.413	3.83E-220	PLASM1	FBgn0028331	l(1)G0289
3.07E-222	0.548230397	0.965	0.812	6.13E-219	PLASM1	FBgn0085466	CG34437
2.50E-221	0.572883126	0.829	0.588	5.00E-218	PLASM1	FBgn0035076	Ance-5
3.06E-214	0.555634287	0.927	0.796	6.12E-211	PLASM1	FBgn0267252	Ggamma30A
6.49E-210	0.362090939	0.848	0.675	1.30E-206	PLASM1	FBgn0053558	mim
1.18E-206	0.511655646	0.913	0.737	2.36E-203	PLASM1	FBgn0032889	CG9331
8.04E-206	0.522692725	0.946	0.879	1.61E-202	PLASM1	FBgn0029507	Tsp42Ed
1.70E-202	0.432826956	0.923	0.833	3.40E-199	PLASM1	FBgn0010039	GstD3
1.23E-201	0.257111917	0.664	0.32	2.46E-198	PLASM1	FBgn0267336	Glut4EF
5.84E-200	0.461561329	0.914	0.82	1.17E-196	PLASM1	FBgn0063494	GstE6
1.86E-188	0.444353428	0.756	0.506	3.72E-185	PLASM1	FBgn0027594	drpr
2.32E-186	0.477502554	0.915	0.758	4.64E-183	PLASM1	FBgn0034398	CG15098
4.40E-182	0.308042792	1	1	8.80E-179	PLASM1	FBgn0000042	Act5C
6.08E-182	0.305111752	1	0.996	1.22E-178	PLASM1	FBgn0040398	CG14629
1.68E-180	0.586875067	0.95	0.887	3.35E-177	PLASM1	FBgn0000279	CecC
1.49E-175	0.272650328	0.837	0.597	2.98E-172	PLASM1	FBgn0052638	CG32638
1.20E-171	0.479840837	0.803	0.576	2.41E-168	PLASM1	FBgn0000578	ena
2.28E-171	0.452103845	0.945	0.86	4.57E-168	PLASM1	FBgn0030955	CG6891
3.23E-171	0.31107552	0.907	0.851	6.45E-168	PLASM1	FBgn0034724	babos
6.97E-170	0.41369099	0.914	0.759	1.39E-166	PLASM1	FBgn0002921	Atpalpha
1.59E-168	0.444120501	0.727	0.499	3.18E-165	PLASM1	FBgn0032405	firl
9.64E-167	0.534724313	0.905	0.772	1.93E-163	PLASM1	FBgn0024238	Fim
1.49E-160	0.285026056	0.794	0.635	2.98E-157	PLASM1	FBgn0031220	CG4822
2.41E-156	0.349495105	0.909	0.845	4.83E-153	PLASM1	FBgn0051769	CG31769
1.46E-152	0.457980113	0.913	0.785	2.92E-149	PLASM1	FBgn0040752	Prosap
3.62E-152	0.400692936	0.991	0.957	7.25E-149	PLASM1	FBgn0040070	Trx-2
8.65E-150	0.489826913	0.912	0.823	1.73E-146	PLASM1	FBgn0032140	CG13117
3.62E-143	0.286270763	0.824	0.831	7.23E-140	PLASM1	FBgn0032946	nrv3
3.75E-141	0.448540112	0.97	0.899	7.50E-138	PLASM1	FBgn0035623	mthl2
1.24E-140	0.329008894	0.776	0.545	2.49E-137	PLASM1	FBgn0019952	Orct
3.42E-138	0.325205184	0.708	0.437	6.84E-135	PLASM1	FBgn0040102	lectin-24Db
6.53E-135	0.40873446	0.777	0.543	1.31E-131	PLASM1	FBgn0243514	eater
1.30E-134	0.411478204	0.9	0.755	2.60E-131	PLASM1	FBgn0030521	CtsB1
2.75E-134	0.351936011	0.874	0.814	5.50E-131	PLASM1	FBgn0050015	CG30015
2.40E-133	0.399725335	0.753	0.508	4.81E-130	PLASM1	FBgn0262881	CG43236
2.83E-133	0.346424862	0.918	0.8	5.65E-130	PLASM1	FBgn0002719	Men
2.43E-132	0.386959935	0.954	0.914	4.85E-129	PLASM1	FBgn0260768	CG42566
4.54E-132	0.276571142	0.826	0.6	9.08E-129	PLASM1	FBgn0040091	Ugt58Fa
6.54E-130	0.299114532	0.826	0.703	1.31E-126	PLASM1	FBgn0033880	CG6553
7.72E-130	0.321656253	0.763	0.542	1.54E-126	PLASM1	FBgn0028990	Spn27A
3.28E-128	0.465307763	0.909	0.805	6.55E-125	PLASM1	FBgn0004456	mew
3.11E-125	0.393872637	0.992	0.977	6.22E-122	PLASM1	FBgn0051363	Jupiter
3.46E-122	0.383591539	0.958	0.876	6.91E-119	PLASM1	FBgn0032731	Swip-1
6.19E-122	0.382710885	0.854	0.718	1.24E-118	PLASM1	FBgn0036144	GlcAT-P
2.96E-121	0.279205233	0.663	0.424	5.92E-118	PLASM1	FBgn0036770	Prestin
2.62E-120	0.399045827	0.837	0.642	5.24E-117	PLASM1	FBgn0028542	NimB4
3.03E-119	0.387907705	0.909	0.805	6.07E-116	PLASM1	FBgn0266186	Vamp7
7.22E-119	0.398665011	0.919	0.85	1.44E-115	PLASM1	FBgn0036518	RhoGAP71E
2.49E-118	0.32563103	0.927	0.803	4.97E-115	PLASM1	FBgn0026189	prominin-like
3.30E-117	0.300909542	0.728	0.634	6.59E-114	PLASM1	FBgn0034736	gas
2.79E-115	0.430950206	0.844	0.749	5.59E-112	PLASM1	FBgn0034408	sano
2.18E-114	0.250612672	0.833	0.755	4.36E-111	PLASM1	FBgn0035767	CG8596
3.38E-109	0.371463792	0.879	0.787	6.76E-106	PLASM1	FBgn0038299	Spn88Eb
1.46E-107	0.251169008	0.742	0.519	2.91E-104	PLASM1	FBgn0016059	Sema1b
4.99E-105	0.320527389	0.835	0.657	9.99E-102	PLASM1	FBgn0020414	Idgf3
2.29E-103	0.31841234	0.852	0.666	4.59E-100	PLASM1	FBgn0011722	Tig
7.96E-101	0.401236193	0.851	0.671	1.59E-97	PLASM1	FBgn0016075	vkg
1.26E-97	0.297281815	0.744	0.549	2.52E-94	PLASM1	FBgn0034985	CG3328
3.40E-97	0.302485178	0.841	0.703	6.79E-94	PLASM1	FBgn0040064	yip2
6.06E-97	0.669783429	0.956	0.901	1.21E-93	PLASM1	FBgn0266253	CR44948
1.09E-96	0.308287556	0.858	0.704	2.19E-93	PLASM1	FBgn0034139	CG4927
1.56E-93	0.31969124	0.602	0.44	3.12E-90	PLASM1	FBgn0015924	crq
1.39E-92	0.264632374	0.686	0.557	2.78E-89	PLASM1	FBgn0031973	Spn28Dc
3.39E-87	0.364789242	0.777	0.728	6.78E-84	PLASM1	FBgn0035708	CG8398
3.51E-87	0.320096527	0.85	0.711	7.02E-84	PLASM1	FBgn0265048	cv-d
7.05E-86	0.363420674	0.905	0.823	1.41E-82	PLASM1	FBgn0014011	Rac2
1.44E-85	0.273605843	0.847	0.695	2.88E-82	PLASM1	FBgn0259735	CG42389
1.79E-85	0.288727282	0.825	0.68	3.59E-82	PLASM1	FBgn0030993	Mec2
3.67E-85	0.299332401	0.904	0.844	7.34E-82	PLASM1	FBgn0041180	Tep4
5.51E-85	0.28852305	0.832	0.783	1.10E-81	PLASM1	FBgn0032036	CG13384
7.08E-84	0.289526685	0.835	0.744	1.42E-80	PLASM1	FBgn0046687	Tre1
2.76E-83	0.461222062	0.91	0.821	5.53E-80	PLASM1	FBgn0041087	wun2
9.94E-83	0.313431637	0.878	0.75	1.99E-79	PLASM1	FBgn0250848	26-29-p
2.80E-80	0.292840977	0.96	0.894	5.60E-77	PLASM1	FBgn0010246	Myo61F
3.30E-80	0.263828349	0.891	0.789	6.59E-77	PLASM1	FBgn0036007	path
3.15E-79	0.275055811	0.984	0.961	6.29E-76	PLASM1	FBgn0030052	CG12065
3.65E-79	0.320348414	0.928	0.863	7.30E-76	PLASM1	FBgn0053494	CG33494
1.60E-78	0.284233092	0.991	0.976	3.20E-75	PLASM1	FBgn0000083	AnxB9
5.24E-78	0.331374906	0.945	0.875	1.05E-74	PLASM1	FBgn0086347	Myo31DF
2.92E-77	0.315936315	0.932	0.841	5.85E-74	PLASM1	FBgn0019661	roX1
3.15E-76	0.269947809	0.922	0.835	6.29E-73	PLASM1	FBgn0262716	Arp3
1.24E-74	0.267164751	0.855	0.715	2.48E-71	PLASM1	FBgn0031090	Rab35
1.25E-74	0.318487434	0.764	0.577	2.49E-71	PLASM1	FBgn0051337	CG31337
2.44E-74	0.261755328	0.793	0.651	4.87E-71	PLASM1	FBgn0000723	FER
2.90E-73	0.258918776	0.78	0.685	5.79E-70	PLASM1	FBgn0031307	MFS3
7.56E-73	0.256116129	0.818	0.758	1.51E-69	PLASM1	FBgn0013718	nuf
2.39E-72	0.251535043	0.862	0.754	4.78E-69	PLASM1	FBgn0031213	galectin
3.69E-72	0.27998861	0.848	0.732	7.38E-69	PLASM1	FBgn0002645	Map205
3.26E-71	0.267466535	0.666	0.513	6.51E-68	PLASM1	FBgn0031914	CG5973
3.74E-69	0.378152632	1	0.998	7.49E-66	PLASM1	FBgn0003886	alphaTub85E
4.09E-69	0.257798744	0.823	0.704	8.18E-66	PLASM1	FBgn0028546	ics
4.71E-69	0.316455312	0.956	0.905	9.41E-66	PLASM1	FBgn0051219	CG31219
3.16E-68	0.251017035	0.548	0.435	6.31E-65	PLASM1	FBgn0052594	be
5.20E-67	0.258893343	0.823	0.732	1.04E-63	PLASM1	FBgn0000017	Abl
1.47E-64	0.278712334	0.697	0.612	2.93E-61	PLASM1	FBgn0265991	Zasp52
1.85E-61	0.27405311	0.667	0.565	3.70E-58	PLASM1	FBgn0261444	CG3638
5.18E-61	0.263171552	0.822	0.71	1.04E-57	PLASM1	FBgn0041710	yellow-f
2.19E-60	0.329994411	0.896	0.826	4.39E-57	PLASM1	FBgn0029932	CG4607
1.31E-59	0.26016639	0.637	0.582	2.61E-56	PLASM1	FBgn0003447	sn
2.82E-59	0.252387942	0.837	0.726	5.64E-56	PLASM1	FBgn0015795	Rab7
3.34E-58	0.371480196	0.948	0.91	6.68E-55	PLASM1	FBgn0004657	mys
5.47E-52	0.282164688	0.746	0.683	1.09E-48	PLASM1	FBgn0000256	capu
4.67E-50	0.374201498	0.854	0.825	9.34E-47	PLASM1	FBgn0039759	CG9733
2.12E-49	0.292872841	0.909	0.86	4.23E-46	PLASM1	FBgn0034443	cer
3.80E-48	0.38850246	0.941	0.908	7.59E-45	PLASM1	FBgn0053225	CG33225
9.48E-48	0.255365483	0.882	0.822	1.90E-44	PLASM1	FBgn0085452	CG34423
7.11E-42	0.302861854	0.915	0.869	1.42E-38	PLASM1	FBgn0260442	rhea
9.67E-40	0.259196385	0.631	0.55	1.93E-36	PLASM1	FBgn0035049	Mmp1
5.05E-38	0.296412196	0.813	0.761	1.01E-34	PLASM1	FBgn0029903	pod1
2.46E-37	0.477398959	0.987	0.971	4.93E-34	PLASM1	FBgn0003888	betaTub60D
4.59E-37	0.389961597	0.995	0.994	9.19E-34	PLASM1	FBgn0040813	Nplp2
2.21E-24	0.257097971	0.873	0.803	4.43E-21	PLASM1	FBgn0003748	Treh
3.40E-22	0.290394361	0.856	0.824	6.81E-19	PLASM1	FBgn0263380	CR43432
2.59E-21	0.283460065	0.873	0.847	5.19E-18	PLASM1	FBgn0010424	TpnC73F
1.93E-18	0.324304715	0.805	0.818	3.85E-15	PLASM1	FBgn0015872	Drip
3.48E-18	0.463089201	0.945	0.919	6.97E-15	PLASM1	FBgn0261363	PPO3
9.54E-12	0.251622216	0.976	0.969	1.91E-08	PLASM1	FBgn0037386	CG1208
2.10E-06	0.266219767	0.969	0.959	0.004194244	PLASM1	FBgn0032422	atilla
1.02E-05	0.279508844	0.849	0.851	0.020312511	PLASM1	FBgn0037477	CG14610
0.00300836	0.261207965	0.838	0.831	1	PLASM1	FBgn0038682	CG5835
0	0.402172639	0.882	0.887	0	PLASM2	FBgn0033469	CG12133
0	0.413266507	0.998	1	0	PLASM2	FBgn0013679	ND1
0	0.507082194	0.995	0.999	0	PLASM2	FBgn0013672	ATP6
0	1.048156005	0.921	0.929	0	PLASM2	FBgn0034010	CG8157
0	1.541567127	0.879	0.982	0	PLASM2	FBgn0264437	CR43855
1.64E-258	0.304046215	0.999	1	3.28E-255	PLASM2	FBgn0013674	COX1
6.56E-240	0.542347915	0.815	0.924	1.31E-236	PLASM2	FBgn0029823	CG3011
2.69E-236	0.730610867	0.93	0.975	5.39E-233	PLASM2	FBgn0259937	Nop60B
4.76E-218	0.322140915	0.997	1	9.51E-215	PLASM2	FBgn0013675	COX2
5.62E-217	0.350606972	0.995	0.998	1.12E-213	PLASM2	FBgn0013678	CYTB
6.08E-217	0.68701311	0.765	0.898	1.22E-213	PLASM2	FBgn0045852	ham
3.47E-156	0.441373711	0.667	0.756	6.93E-153	PLASM2	FBgn0034997	CG3376
2.50E-150	0.530456448	0.752	0.86	5.01E-147	PLASM2	FBgn0069923	CG41128
3.88E-145	0.285990507	0.774	0.87	7.76E-142	PLASM2	FBgn0086365	Orct2
2.55E-144	0.414931402	0.873	0.889	5.09E-141	PLASM2	FBgn0022359	Sodh-2
5.64E-143	0.442427337	0.873	0.92	1.13E-139	PLASM2	FBgn0029148	NHP2
1.06E-142	0.430767244	0.905	0.922	2.11E-139	PLASM2	FBgn0033446	CG1648
9.04E-139	0.448878537	0.669	0.685	1.81E-135	PLASM2	FBgn0028514	CG4793
5.94E-138	0.284331587	0.586	0.656	1.19E-134	PLASM2	FBgn0037548	CG7900
2.68E-131	0.510025863	0.858	0.901	5.37E-128	PLASM2	FBgn0267505	pre-rRNA:CR45845
6.45E-129	0.277666861	0.761	0.748	1.29E-125	PLASM2	FBgn0053459	CG33459
3.62E-127	0.536524746	0.919	0.954	7.23E-124	PLASM2	FBgn0026196	nop5
2.67E-115	0.399997395	0.841	0.897	5.33E-112	PLASM2	FBgn0002778	mnd
2.53E-112	0.436368924	0.895	0.9	5.06E-109	PLASM2	FBgn0041183	Tep1
1.19E-107	0.349609695	0.625	0.765	2.39E-104	PLASM2	FBgn0004652	fru
5.65E-99	0.286416312	0.535	0.625	1.13E-95	PLASM2	FBgn0053461	CG33461
1.66E-91	0.371769976	0.912	0.944	3.33E-88	PLASM2	FBgn0025885	Inos
1.71E-91	0.305863567	0.8	0.817	3.41E-88	PLASM2	FBgn0010387	Dbi
3.92E-88	0.29958705	0.864	0.88	7.83E-85	PLASM2	FBgn0037723	SpdS
2.76E-87	0.385435314	0.644	0.802	5.52E-84	PLASM2	FBgn0040837	CG8620
5.02E-83	0.287414816	0.743	0.848	1.00E-79	PLASM2	FBgn0028480	CG17841
6.44E-80	0.410098344	0.838	0.889	1.29E-76	PLASM2	FBgn0000064	Ald
1.25E-77	0.387766806	0.918	0.945	2.49E-74	PLASM2	FBgn0011824	CG4038
3.52E-69	0.38196529	0.921	0.945	7.04E-66	PLASM2	FBgn0003062	Fib
1.39E-64	0.346992504	0.671	0.722	2.79E-61	PLASM2	FBgn0267033	mamo
1.61E-64	0.269415798	0.817	0.855	3.21E-61	PLASM2	FBgn0052626	AMPdeam
3.87E-62	0.386972113	0.736	0.833	7.73E-59	PLASM2	FBgn0001291	Jra
1.99E-60	0.281938635	0.773	0.831	3.97E-57	PLASM2	FBgn0040237	bor
2.53E-60	0.250948269	0.913	0.936	5.06E-57	PLASM2	FBgn0034915	eIF6
2.70E-59	0.270943689	0.74	0.705	5.40E-56	PLASM2	FBgn0034194	CG15611
5.45E-58	0.347047589	0.934	0.943	1.09E-54	PLASM2	FBgn0260008	UQCR-11
7.48E-41	0.294728352	0.791	0.838	1.50E-37	PLASM2	FBgn0262656	Myc
0	0.347935374	0.65	0.645	0	CC	FBgn0002576	lz
0	0.35871547	0.626	0.82	0	CC	FBgn0032123	Oatp30B
0	0.511926707	0.745	0.723	0	CC	FBgn0002609	E(spl)m3-HLH
0	0.576755036	0.389	0.51	0	CC	FBgn0036822	NijB
0	0.611254231	0.804	0.883	0	CC	FBgn0032810	CG13077
0	0.621682541	0.706	0.571	0	CC	FBgn0011589	Elk
0	0.6828955	0.87	0.95	0	CC	FBgn0035587	Gdap1
0	0.718584603	0.303	0.768	0	CC	FBgn0037163	laza
0	0.850710832	0.558	0.759	0	CC	FBgn0042104	CG18747
0	0.85580229	0.708	0.762	0	CC	FBgn0032820	fbp
0	0.925845146	0.768	0.927	0	CC	FBgn0263995	cpo
0	1.079742193	0.742	0.916	0	CC	FBgn0051431	CG31431
0	1.084241501	0.853	0.886	0	CC	FBgn0032721	CG10602
0	1.114051307	0.965	0.993	0	CC	FBgn0001233	Hsp83
0	1.116095524	0.727	0.86	0	CC	FBgn0013469	klu
0	1.142966194	0.631	0.87	0	CC	FBgn0039266	CG11791
0	1.158133169	0.747	0.919	0	CC	FBgn0002733	E(spl)mbeta-HLH
0	1.207185224	0.8	0.864	0	CC	FBgn0062413	Ctr1A
0	1.248482111	0.656	0.889	0	CC	FBgn0036848	CG10424
0	1.253231309	0.446	0.783	0	CC	FBgn0035132	mthl10
0	1.262370005	0.475	0.871	0	CC	FBgn0026160	tna
0	1.264680982	0.519	0.783	0	CC	FBgn0023129	aay
0	1.26935547	0.614	0.566	0	CC	FBgn0063667	CG32335
0	1.293133792	0.536	0.712	0	CC	FBgn0027843	CAH2
0	1.332021147	0.653	0.769	0	CC	FBgn0031682	CG5828
0	1.333813792	0.793	0.904	0	CC	FBgn0052446	Atox1
0	1.361989368	0.53	0.749	0	CC	FBgn0035678	CG10469
0	1.448587328	0.838	0.945	0	CC	FBgn0000064	Ald
0	1.453790515	0.753	0.957	0	CC	FBgn0004647	N
0	1.535717658	0.921	0.981	0	CC	FBgn0029174	FKBP59
0	1.602568172	0.684	0.805	0	CC	FBgn0011770	Gip
0	1.774437972	0.614	0.651	0	CC	FBgn0035189	CG9119
0	1.876990723	0.704	0.69	0	CC	FBgn0039051	CG17109
0	1.900326776	0.918	0.965	0	CC	FBgn0002719	Men
0	1.936799498	0.336	0.714	0	CC	FBgn0030653	CG7860
0	2.017705423	0.733	0.954	0	CC	FBgn0003053	peb
0	2.380987474	0.298	0.802	0	CC	FBgn0263773	fok
0	2.45509369	0.639	0.862	0	CC	FBgn0035679	CG10467
0	2.507277779	0.745	0.927	0	CC	FBgn0264815	Pde1c
0	3.848571456	0.784	0.985	0	CC	FBgn0283437	PPO1
0	4.076066279	0.876	0.996	0	CC	FBgn0033367	PPO2
9.93901611907766e-312	0.397422757	0.706	0.906	0.00E+00	CC	FBgn0033065	Cyp6w1
6.75E-297	0.810631287	0.761	0.809	1.35E-293	CC	FBgn0028563	sut1
5.26E-284	0.835995782	0.316	0.49	1.05E-280	CC	FBgn0030029	CG15343
1.65E-280	0.67766062	0.432	0.603	3.30E-277	CC	FBgn0265052	St3
3.77E-267	0.335742864	0.516	0.689	7.54E-264	CC	FBgn0002578	Kaz-m1
5.29E-251	0.881487167	0.848	0.935	1.06E-247	CC	FBgn0033913	CG8468
5.68E-241	0.607320466	0.235	0.423	1.14E-237	CC	FBgn0032436	CG5418
3.19E-240	0.709171391	0.837	0.922	6.37E-237	CC	FBgn0052638	CG32638
2.28E-233	0.690885478	0.714	0.767	4.57E-230	CC	FBgn0052369	CG32369
5.33E-233	1.361455575	0.672	0.564	1.07E-229	CC	FBgn0002869	MtnB
8.38E-232	0.406867375	0.479	0.571	1.68E-228	CC	FBgn0051174	CG31174
1.66E-228	0.264812027	0.251	0.791	3.32E-225	CC	FBgn0052816	CG32816
5.79E-227	1.336999405	0.67	0.871	1.16E-223	CC	FBgn0001225	Hsp26
1.71E-211	0.37646718	0.289	0.237	3.42E-208	CC	FBgn0036750	CG6034
3.82E-198	0.47623662	0.682	0.666	7.63E-195	CC	FBgn0032727	CG10623
2.25E-191	0.654741516	0.632	0.809	4.50E-188	CC	FBgn0263659	CR43650
2.96E-190	0.75396342	0.891	0.923	5.92E-187	CC	FBgn0036007	path
1.88E-187	1.070340971	0.817	0.79	3.76E-184	CC	FBgn0262146	MtnE
3.69E-170	0.647635348	0.729	0.892	7.38E-167	CC	FBgn0052850	CG32850
1.41E-157	0.93127677	0.85	0.84	2.82E-154	CC	FBgn0053192	MtnD
1.15E-156	0.517228534	0.454	0.598	2.30E-153	CC	FBgn0004611	Plc21C
4.01E-155	0.696210661	0.583	0.807	8.02E-152	CC	FBgn0259715	CG42369
1.92E-145	0.7714968	0.727	0.86	3.83E-142	CC	FBgn0032405	firl
1.51E-135	0.504035402	0.76	0.903	3.02E-132	CC	FBgn0014930	CG2846
1.60E-133	0.529444483	0.664	0.763	3.20E-130	CC	FBgn0267336	Glut4EF
1.79E-119	0.273361001	0.646	0.895	3.58E-116	CC	FBgn0261808	cu
4.16E-118	0.411490858	0.557	0.653	8.32E-115	CC	FBgn0033638	CG9005
4.21E-116	0.349921739	0.658	0.859	8.42E-113	CC	FBgn0037443	Dmtn
1.47E-113	0.653462779	0.93	0.98	2.93E-110	CC	FBgn0259937	Nop60B
1.40E-112	0.421161783	0.552	0.575	2.81E-109	CC	FBgn0031099	CG17065
1.76E-112	0.2537741	0.553	0.499	3.51E-109	CC	FBgn0283680	IP3K2
1.03E-108	0.34867559	0.643	0.889	2.05E-105	CC	FBgn0063449	Uhg2
1.86E-107	0.900731314	0.66	0.812	3.72E-104	CC	FBgn0001224	Hsp23
2.66E-105	0.400260449	0.864	0.922	5.31E-102	CC	FBgn0037723	SpdS
7.22E-103	0.293641169	0.729	0.751	1.44E-99	CC	FBgn0030345	CG1847
2.55E-101	0.351975341	0.705	0.924	5.10E-98	CC	FBgn0030067	Rbm13
5.15E-101	0.639262001	0.933	0.967	1.03E-97	CC	FBgn0259979	CG17337
1.43E-96	0.307457357	0.777	0.822	2.86E-93	CC	FBgn0051361	dpr17
2.01E-93	0.498163535	0.707	0.796	4.01E-90	CC	FBgn0051637	CG31637
6.70E-93	0.331631057	0.824	0.921	1.34E-89	CC	FBgn0032946	nrv3
5.44E-90	0.51655253	0.991	0.997	1.09E-86	CC	FBgn0040070	Trx-2
2.56E-89	0.493283778	0.788	0.873	5.12E-86	CC	FBgn0264491	how
1.16E-85	0.365164044	0.78	0.789	2.31E-82	CC	FBgn0262699	rap
3.86E-85	0.368373115	0.636	0.744	7.71E-82	CC	FBgn0030808	RhoGAP15B
5.69E-83	0.588659214	0.484	0.731	1.14E-79	CC	FBgn0001089	Gal
2.14E-82	0.40522572	0.7	0.823	4.28E-79	CC	FBgn0038912	CG6656
1.18E-81	0.544045972	0.919	0.972	2.35E-78	CC	FBgn0026196	nop5
2.63E-81	0.422884986	0.682	0.892	5.27E-78	CC	FBgn0034390	CG15093
5.29E-81	0.641790409	0.917	0.971	1.06E-77	CC	FBgn0040099	lectin-28C
9.23E-79	0.315893996	0.866	0.934	1.85E-75	CC	FBgn0262945	CR43264
5.64E-74	0.286026136	0.59	0.618	1.13E-70	CC	FBgn0027621	Pfrx
5.97E-74	0.6511416	0.554	0.693	1.19E-70	CC	FBgn0001230	Hsp68
1.30E-72	0.323248247	0.826	0.954	2.60E-69	CC	FBgn0040091	Ugt58Fa
2.20E-70	0.35547128	0.742	0.915	4.40E-67	CC	FBgn0015776	nrv1
2.07E-69	0.412418192	0.965	0.994	4.15E-66	CC	FBgn0033635	Prip
2.26E-68	0.467848792	0.942	0.968	4.52E-65	CC	FBgn0000318	cl
5.34E-68	0.337724488	0.694	0.699	1.07E-64	CC	FBgn0033844	bbc
1.04E-67	0.281428855	0.841	0.765	2.08E-64	CC	FBgn0002778	mnd
5.95E-66	0.461221816	0.757	0.914	1.19E-62	CC	FBgn0010225	Gel
2.97E-64	0.287675538	0.52	0.679	5.94E-61	CC	FBgn0042094	Adk3
8.19E-62	0.388337487	0.483	0.684	1.64E-58	CC	FBgn0266376	CR45018
9.29E-61	0.334607659	0.606	0.777	1.86E-57	CC	FBgn0026315	Ugt35a
7.31E-57	0.439332915	0.872	0.925	1.46E-53	CC	FBgn0035432	ZnT63C
1.37E-56	0.332696078	0.699	0.887	2.74E-53	CC	FBgn0036298	nst
1.46E-54	0.36022856	0.569	0.784	2.93E-51	CC	FBgn0034405	Jheh2
5.90E-53	0.378189312	0.961	0.957	1.18E-49	CC	FBgn0040309	Jafrac1
5.01E-51	0.537937397	0.673	0.786	1.00E-47	CC	FBgn0001226	Hsp27
2.30E-50	0.320368648	0.694	0.805	4.60E-47	CC	FBgn0263106	DnaJ-1
1.48E-49	0.369576988	0.835	0.862	2.97E-46	CC	FBgn0000250	cact
1.49E-49	0.270944881	0.676	0.698	2.98E-46	CC	FBgn0013279	Hsp70Bc
1.74E-48	0.282005617	0.914	0.967	3.48E-45	CC	FBgn0063494	GstE6
7.86E-47	0.292129838	0.873	0.938	1.57E-43	CC	FBgn0029148	NHP2
1.11E-46	0.4270637	0.829	0.94	2.23E-43	CC	FBgn0035076	Ance-5
1.43E-46	0.368601879	0.967	0.987	2.86E-43	CC	FBgn0011828	Pxn
2.50E-46	0.298858315	0.808	0.786	5.00E-43	CC	FBgn0039714	Zip99C
4.36E-45	0.376558078	0.709	0.844	8.73E-42	CC	FBgn0000097	aop
2.84E-44	0.368799839	0.918	0.961	5.68E-41	CC	FBgn0011824	CG4038
5.33E-43	0.315081282	0.744	0.889	1.07E-39	CC	FBgn0030608	Lsd-2
3.79E-41	0.592022654	0.992	0.99	7.58E-38	CC	FBgn0002868	MtnA
6.12E-41	0.393872803	0.921	0.969	1.22E-37	CC	FBgn0003062	Fib
3.03E-38	0.253971346	0.469	0.632	6.06E-35	CC	FBgn0053465	CG33465
1.06E-36	0.439603683	0.862	0.907	2.12E-33	CC	FBgn0004654	Pgd
5.10E-36	0.251744855	0.913	0.953	1.02E-32	CC	FBgn0283461	Drs
1.10E-35	0.289131504	0.851	0.962	2.19E-32	CC	FBgn0016075	vkg
1.47E-33	0.280512262	0.543	0.628	2.93E-30	CC	FBgn0034501	CG13868
4.25E-33	0.268134176	0.637	0.749	8.51E-30	CC	FBgn0023526	CG2865
5.30E-31	0.322313547	0.669	0.804	1.06E-27	CC	FBgn0053170	CG33170
2.27E-30	0.31104627	0.644	0.743	4.55E-27	CC	FBgn0040837	CG8620
3.33E-30	0.310148483	0.791	0.926	6.66E-27	CC	FBgn0262656	Myc
1.07E-28	0.304889758	0.745	0.837	2.15E-25	CC	FBgn0001234	Hsromega
3.55E-24	0.313326281	0.858	0.909	7.09E-21	CC	FBgn0267505	pre-rRNA:CR45845
2.35E-184	1.272574799	0.673	0.947	4.71E-181	MET	FBgn0001226	Hsp27
3.48E-122	0.637169462	0.538	0.693	6.96E-119	MET	FBgn0001142	Gs1
3.02E-106	0.652762823	0.324	0.717	6.05E-103	MET	FBgn0036587	CG4950
5.62E-95	0.848461864	0.66	0.922	1.12E-91	MET	FBgn0001224	Hsp23
2.01E-83	0.282104753	0.329	0.576	4.02E-80	MET	FBgn0259682	Jabba
3.67E-82	0.267175082	0.501	0.488	7.34E-79	MET	FBgn0029924	CG4586
3.93E-81	0.767116251	0.484	0.855	7.86E-78	MET	FBgn0001089	Gal
1.13E-80	0.810063904	0.753	0.883	2.26E-77	MET	FBgn0032400	CG6770
2.45E-74	0.495649128	0.715	0.947	4.90E-71	MET	FBgn0031717	Oscillin
4.08E-72	0.375256923	0.537	0.965	8.15E-69	MET	FBgn0264982	CR44133
2.84E-67	0.346805729	0.627	0.968	5.67E-64	MET	FBgn0051098	CG31098
3.47E-66	0.315588909	0.713	0.979	6.94E-63	MET	FBgn0032726	CG10621
2.72E-65	0.27364235	0.87	0.996	5.44E-62	MET	FBgn0035587	Gdap1
1.43E-63	0.716135374	0.855	0.979	2.85E-60	MET	FBgn0026721	fat-spondin
1.13E-62	0.631994419	0.913	0.996	2.25E-59	MET	FBgn0283461	Drs
1.39E-62	0.696783142	0.811	0.915	2.78E-59	MET	FBgn0051075	CG31075
9.77E-62	0.849413562	0.932	0.979	1.95E-58	MET	FBgn0019661	roX1
2.61E-60	0.784497697	0.963	1	5.22E-57	MET	FBgn0014163	fax
2.04E-58	0.306501317	0.592	0.883	4.08E-55	MET	FBgn0085446	CG34417
3.24E-57	0.27573054	0.57	0.926	6.47E-54	MET	FBgn0015568	alpha-Est1
1.98E-56	0.767408712	0.753	0.961	3.95E-53	MET	FBgn0262881	CG43236
1.51E-55	0.264648088	0.373	0.643	3.03E-52	MET	FBgn0035160	hng3
1.98E-55	0.444855733	0.643	0.961	3.96E-52	MET	FBgn0015372	RabX1
1.84E-54	0.58387615	0.827	0.982	3.67E-51	MET	FBgn0037913	fabp
3.80E-54	0.738109391	0.67	0.908	7.60E-51	MET	FBgn0001225	Hsp26
1.91E-53	0.290302146	0.631	0.986	3.82E-50	MET	FBgn0028983	Spn55B
3.67E-53	0.63849356	0.825	0.929	7.33E-50	MET	FBgn0030993	Mec2
3.72E-52	0.295499801	0.679	0.753	7.43E-49	MET	FBgn0000565	Eip71CD
5.93E-51	0.537762472	0.313	0.647	1.19E-47	MET	FBgn0030326	CG2444
1.21E-49	0.317005493	0.69	0.982	2.41E-46	MET	FBgn0038034	Cyp9f3Psi
2.46E-49	0.360981327	0.599	0.912	4.92E-46	MET	FBgn0031012	CG8051
8.14E-49	0.51866884	0.937	0.996	1.63E-45	MET	FBgn0030362	regucalcin
9.52E-49	0.54429768	0.463	0.76	1.90E-45	MET	FBgn0000071	Ama
3.62E-46	0.38260755	0.666	0.986	7.24E-43	MET	FBgn0031914	CG5973
1.10E-44	0.290268295	0.653	0.947	2.19E-41	MET	FBgn0260743	GC1
1.06E-42	0.591680005	0.69	0.866	2.11E-39	MET	FBgn0000261	Cat
7.95E-42	0.454291095	0.633	0.919	1.59E-38	MET	FBgn0033476	oys
1.36E-40	0.520711248	0.965	0.989	2.72E-37	MET	FBgn0033635	Prip
2.39E-40	0.343470425	0.429	0.562	4.79E-37	MET	FBgn0001967	NimC3
3.32E-39	0.265075593	0.634	0.922	6.65E-36	MET	FBgn0039827	CG1544
6.39E-38	0.583994719	0.508	0.774	1.28E-34	MET	FBgn0027601	pdgy
6.74E-36	0.279405227	0.713	0.979	1.35E-32	MET	FBgn0028970	betaggt-II
4.61E-35	0.469978677	0.745	0.926	9.23E-32	MET	FBgn0001234	Hsromega
6.68E-35	0.281484393	0.634	0.936	1.34E-31	MET	FBgn0085261	CG34232
1.43E-34	0.499783467	0.782	0.943	2.86E-31	MET	FBgn0025814	Mgstl
1.15E-33	0.534739156	0.618	0.852	2.29E-30	MET	FBgn0286198	NA
3.08E-33	0.530641318	0.727	0.901	6.16E-30	MET	FBgn0032405	firl
1.29E-32	0.259494874	0.336	0.689	2.59E-29	MET	FBgn0030653	CG7860
9.39E-31	0.57606503	0.856	0.975	1.88E-27	MET	FBgn0012037	Ance
1.36E-30	0.277079048	0.637	0.926	2.72E-27	MET	FBgn0038197	foxo
6.30E-30	0.272599994	0.669	0.936	1.26E-26	MET	FBgn0025628	CG4199
1.63E-29	0.418180394	0.637	0.742	3.26E-26	MET	FBgn0003447	sn
5.80E-29	0.357216591	0.851	0.866	1.16E-25	MET	FBgn0033725	Cpr49Ac
8.35E-29	0.33564216	0.496	0.643	1.67E-25	MET	FBgn0262737	mub
1.47E-28	0.526038759	0.946	0.996	2.95E-25	MET	FBgn0031327	CG5397
3.59E-28	0.436150038	0.875	0.943	7.17E-25	MET	FBgn0038826	Syp
1.16E-27	0.359334158	0.34	0.661	2.33E-24	MET	FBgn0001296	kar
5.31E-27	0.30570376	0.384	0.445	1.06E-23	MET	FBgn0037146	CG7470
7.21E-27	0.363000285	0.862	0.989	1.44E-23	MET	FBgn0031213	galectin
5.88E-26	0.471270483	0.974	1	1.18E-22	MET	FBgn0001149	GstD1
6.54E-26	0.422013366	0.917	0.982	1.31E-22	MET	FBgn0040099	lectin-28C
1.24E-25	0.273234989	0.584	0.721	2.48E-22	MET	FBgn0014427	CG11899
1.35E-25	0.251417087	0.788	0.982	2.69E-22	MET	FBgn0029710	CG3568
1.71E-24	0.438104603	0.841	0.972	3.41E-21	MET	FBgn0040064	yip2
3.18E-23	0.480673315	0.9	0.986	6.36E-20	MET	FBgn0030521	CtsB1
3.97E-23	0.27851089	0.575	0.841	7.95E-20	MET	FBgn0020257	Ppa
5.83E-22	0.35692008	0.418	0.657	1.17E-18	MET	FBgn0036821	CG3961
7.39E-22	0.415633758	0.602	0.82	1.48E-18	MET	FBgn0015924	crq
1.25E-19	0.278878105	0.543	0.788	2.50E-16	MET	FBgn0262588	CG43125
2.44E-19	0.331787034	0.84	0.947	4.89E-16	MET	FBgn0033949	CG10131
3.01E-19	0.441987333	0.835	0.947	6.02E-16	MET	FBgn0043070	MESK2
1.09E-18	0.301645173	0.357	0.611	2.18E-15	MET	FBgn0036262	CG6910
4.58E-18	0.384639782	0.967	1	9.16E-15	MET	FBgn0015222	Fer1HCH
5.16E-18	0.30186809	0.526	0.742	1.03E-14	MET	FBgn0052062	Rbfox1
5.68E-18	0.355427545	0.848	0.982	1.14E-14	MET	FBgn0002645	Map205
1.62E-17	0.329772294	0.945	0.986	3.24E-14	MET	FBgn0013763	Idgf6
8.19E-17	0.256412753	0.692	0.905	1.64E-13	MET	FBgn0266417	CG45057
1.68E-15	0.302073428	0.556	0.608	3.35E-12	MET	FBgn0036857	CG9629
1.82E-15	0.289208259	0.543	0.763	3.64E-12	MET	FBgn0034501	CG13868
4.04E-15	0.326667613	0.637	0.728	8.09E-12	MET	FBgn0017558	Pdk
8.77E-15	0.288907114	0.921	0.996	1.75E-11	MET	FBgn0029174	FKBP59
1.22E-14	0.297333467	0.744	0.901	2.45E-11	MET	FBgn0030608	Lsd-2
4.39E-14	0.30649591	0.537	0.71	8.79E-11	MET	FBgn0022774	Oat
1.59E-13	0.345314289	0.909	0.943	3.18E-10	MET	FBgn0034443	cer
3.07E-13	0.262895169	0.546	0.689	6.14E-10	MET	FBgn0284408	NA
7.85E-13	0.334769225	0.416	0.569	1.57E-09	MET	FBgn0015399	kek1
8.36E-13	0.365715016	0.311	0.505	1.67E-09	MET	FBgn0261989	CG42807
1.20E-12	0.275710356	0.618	0.788	2.39E-09	MET	FBgn0036732	Oatp74D
1.24E-12	0.310902572	0.803	0.94	2.48E-09	MET	FBgn0000578	ena
1.44E-12	0.264252819	0.792	0.922	2.87E-09	MET	FBgn0038966	pinta
5.05E-12	0.283101497	0.777	0.901	1.01E-08	MET	FBgn0243514	eater
8.97E-12	0.259614514	0.992	0.996	1.79E-08	MET	FBgn0033724	CG8501
3.24E-11	0.411866445	0.971	0.996	6.48E-08	MET	FBgn0015221	Fer2LCH
2.23E-10	0.289923211	0.907	0.982	4.47E-07	MET	FBgn0025682	scf
4.75E-10	0.525529392	0.784	0.922	9.51E-07	MET	FBgn0283437	PPO1
1.05E-09	0.315678602	0.707	0.813	2.10E-06	MET	FBgn0051637	CG31637
2.80E-09	0.308630859	0.733	0.869	5.60E-06	MET	FBgn0011666	msi
3.54E-09	0.26066913	0.854	0.905	7.08E-06	MET	FBgn0036144	GlcAT-P
8.38E-09	0.288078011	0.992	1	1.68E-05	MET	FBgn0002868	MtnA
1.53E-06	0.277046482	0.773	0.837	0.003064045	MET	FBgn0001168	h
2.15E-05	0.250386278	0.824	0.837	0.042953426	MET	FBgn0086355	Tpi
0	1.562938472	0.84	0.913	0	AMP	FBgn0037906	PGRP-LB
0	1.600315551	0.805	0.934	0	AMP	FBgn0000278	CecB
0	2.106896033	0.848	0.974	0	AMP	FBgn0000277	CecA2
0	2.199768605	0.807	0.878	0	AMP	FBgn0010388	Dro
0	2.385249438	0.913	0.974	0	AMP	FBgn0283461	Drs
0	3.107090709	0.831	0.974	0	AMP	FBgn0014865	Mtk
0	3.201328598	0.884	0.98	0	AMP	FBgn0000276	CecA1
1.97626258336499e-323	2.315733989	0.95	1	3.95252516672997e-320	AMP	FBgn0000279	CecC
8.56E-250	2.121767638	0.753	0.99	1.71E-246	AMP	FBgn0262881	CG43236
2.01E-241	0.693999719	0.705	0.827	4.02E-238	AMP	FBgn0052368	CG32368
1.29E-240	0.870612004	0.693	0.801	2.58E-237	AMP	FBgn0030310	PGRP-SA
1.58E-225	0.500702862	0.507	0.735	3.16E-222	AMP	FBgn0266405	CR45045
2.88E-151	0.903235058	0.851	0.872	5.76E-148	AMP	FBgn0030160	CG9691
3.42E-147	1.004225426	0.877	0.867	6.85E-144	AMP	FBgn0051313	CG31313
1.32E-100	0.282699834	0.743	0.837	2.63E-97	AMP	FBgn0032297	CG17124
3.02E-76	0.26104983	0.66	0.684	6.03E-73	AMP	FBgn0053926	CG33926
2.31E-75	1.120549416	0.956	1	4.61E-72	AMP	FBgn0266569	CG42259
1.01E-66	0.994964593	0.97	0.98	2.01E-63	AMP	FBgn0262794	CG43175
3.83E-66	0.694538381	0.643	0.786	7.67E-63	AMP	FBgn0015372	RabX1
6.89E-64	0.888408584	0.814	0.923	1.38E-60	AMP	FBgn0014018	Rel
1.84E-63	0.3698848	0.681	0.806	3.67E-60	AMP	FBgn0034335	GstE1
6.07E-63	0.414882237	0.481	0.628	1.21E-59	AMP	FBgn0034647	pirk
8.97E-59	0.769904351	0.605	0.888	1.79E-55	AMP	FBgn0029711	Usf
1.13E-57	0.254559939	0.793	0.867	2.25E-54	AMP	FBgn0262035	CG42846
1.43E-57	0.647913927	0.798	0.862	2.86E-54	AMP	FBgn0041182	Tep2
1.74E-57	0.615324321	0.737	0.816	3.47E-54	AMP	FBgn0003557	Su(dx)
2.98E-53	0.344276583	0.808	0.857	5.96E-50	AMP	FBgn0038595	CG7142
1.23E-45	0.784991978	0.311	0.709	2.45E-42	AMP	FBgn0261989	CG42807
1.45E-45	0.314019193	0.429	0.816	2.89E-42	AMP	FBgn0032785	CG10026
2.58E-44	0.510884375	0.609	0.76	5.16E-41	AMP	FBgn0003475	spir
2.33E-41	0.551646058	0.84	0.903	4.66E-38	AMP	FBgn0038088	CG10126
1.55E-39	0.398483117	0.671	0.816	3.10E-36	AMP	FBgn0085484	Pdxk
4.16E-39	0.41606789	0.87	0.903	8.32E-36	AMP	FBgn0035587	Gdap1
1.05E-38	0.492364649	0.808	0.832	2.09E-35	AMP	FBgn0039714	Zip99C
1.20E-38	0.410726083	0.834	0.908	2.41E-35	AMP	FBgn0034638	CG10433
6.45E-38	0.470196889	0.466	0.719	1.29E-34	AMP	FBgn0259175	ome
2.99E-37	0.622543991	0.857	0.944	5.99E-34	AMP	FBgn0028984	Spn88Ea
9.78E-37	1.122270044	0.895	0.934	1.96E-33	AMP	FBgn0041183	Tep1
1.15E-36	0.355786297	0.799	0.832	2.31E-33	AMP	FBgn0040850	CG15210
9.58E-36	0.254576528	0.686	0.714	1.92E-32	AMP	FBgn0032955	CG2201
4.60E-35	0.543776332	0.772	0.832	9.20E-32	AMP	FBgn0264894	CG44085
4.60E-35	0.49826824	0.434	0.816	9.20E-32	AMP	FBgn0050456	CG30456
6.27E-33	0.253482806	0.41	0.633	1.25E-29	AMP	FBgn0030332	CG9360
1.57E-31	0.274786391	0.648	0.704	3.14E-28	AMP	FBgn0035977	PGRP-LF
5.89E-31	0.637529725	0.92	0.964	1.18E-27	AMP	FBgn0265413	CG44325
5.34E-30	0.319739769	0.82	0.796	1.07E-26	AMP	FBgn0262563	CG43103
1.82E-29	0.548477976	0.676	0.862	3.64E-26	AMP	FBgn0035770	pst
2.04E-27	0.358433259	0.528	0.745	4.09E-24	AMP	FBgn0033388	CG8046
5.44E-27	0.553074065	0.764	0.883	1.09E-23	AMP	FBgn0040551	CG11686
7.14E-27	0.378489235	0.727	0.765	1.43E-23	AMP	FBgn0000636	Fas3
9.51E-27	0.466593994	0.746	0.857	1.90E-23	AMP	FBgn0038465	Irc
1.62E-25	0.48700927	0.923	0.949	3.25E-22	AMP	FBgn0010039	GstD3
1.22E-22	0.46858501	0.915	0.964	2.43E-19	AMP	FBgn0034398	CG15098
2.15E-22	0.507517669	0.756	0.913	4.29E-19	AMP	FBgn0027594	drpr
2.18E-22	0.367411243	0.684	0.862	4.35E-19	AMP	FBgn0035173	CG13907
3.33E-22	0.44243683	0.795	0.872	6.66E-19	AMP	FBgn0026602	Ady43A
4.71E-22	0.487367747	0.987	0.995	9.42E-19	AMP	FBgn0003888	betaTub60D
8.79E-22	0.431755541	0.914	0.939	1.76E-18	AMP	FBgn0063494	GstE6
2.09E-21	0.345991151	0.8	0.913	4.17E-18	AMP	FBgn0062413	Ctr1A
1.22E-20	0.360078509	0.795	0.837	2.45E-17	AMP	FBgn0012034	AcCoAS
7.46E-20	0.421867132	0.862	0.939	1.49E-16	AMP	FBgn0086558	Ubi-p5E
8.84E-20	0.556833639	0.721	0.867	1.77E-16	AMP	FBgn0004629	Cys
5.43E-19	0.439414321	0.825	0.939	1.09E-15	AMP	FBgn0030993	Mec2
7.87E-19	0.511853244	0.906	0.934	1.57E-15	AMP	FBgn0001941	ifc
8.95E-19	0.456443956	0.929	0.969	1.79E-15	AMP	FBgn0028663	VhaM9.7-b
1.27E-18	0.397613588	0.712	0.837	2.54E-15	AMP	FBgn0011672	Mvl
3.09E-18	0.406857537	0.967	0.995	6.19E-15	AMP	FBgn0015222	Fer1HCH
1.57E-17	0.250612759	0.735	0.827	3.15E-14	AMP	FBgn0031470	CG18557
3.18E-17	0.44379513	0.757	0.821	6.37E-14	AMP	FBgn0038243	CG8066
5.46E-17	0.33860699	0.56	0.755	1.09E-13	AMP	FBgn0033212	LRR
8.28E-17	0.606073188	0.855	0.949	1.66E-13	AMP	FBgn0043841	vir-1
1.56E-16	0.379493623	0.837	0.959	3.13E-13	AMP	FBgn0015795	Rab7
1.64E-16	0.45071169	0.835	0.929	3.28E-13	AMP	FBgn0020414	Idgf3
4.34E-16	0.418569682	0.905	0.964	8.68E-13	AMP	FBgn0014011	Rac2
8.05E-16	0.301990874	0.526	0.796	1.61E-12	AMP	FBgn0031484	CG3165
2.33E-15	0.325866317	0.596	0.75	4.66E-12	AMP	FBgn0028940	Cyp28a5
2.66E-15	0.386614501	0.945	0.98	5.32E-12	AMP	FBgn0013763	Idgf6
6.76E-15	0.392820815	0.9	0.969	1.35E-11	AMP	FBgn0030521	CtsB1
7.59E-15	0.424930999	0.901	0.954	1.52E-11	AMP	FBgn0033777	CG17574
8.26E-15	0.363850874	0.763	0.791	1.65E-11	AMP	FBgn0014906	Hydr2
1.20E-14	0.276724022	0.501	0.663	2.39E-11	AMP	FBgn0038129	TBC1D5
1.44E-14	0.424388914	0.938	0.959	2.88E-11	AMP	FBgn0040285	Scamp
1.46E-14	0.455292756	0.827	0.908	2.92E-11	AMP	FBgn0037913	fabp
1.56E-14	0.324652685	0.496	0.73	3.12E-11	AMP	FBgn0032147	IP3K1
2.11E-14	0.288306712	0.563	0.791	4.22E-11	AMP	FBgn0044047	Ilp6
2.21E-14	0.352733751	0.851	0.929	4.43E-11	AMP	FBgn0030396	CG2556
2.46E-14	0.317257199	0.906	0.929	4.92E-11	AMP	FBgn0031547	Sr-CIV
2.61E-14	0.343765655	0.851	0.934	5.22E-11	AMP	FBgn0285910	NA
2.70E-14	0.379989625	0.991	0.995	5.41E-11	AMP	FBgn0000083	AnxB9
7.36E-14	0.311093958	0.581	0.77	1.47E-10	AMP	FBgn0013272	Gp150
1.61E-13	0.279521355	0.584	0.714	3.22E-10	AMP	FBgn0085443	spri
1.88E-13	0.330149009	0.822	0.893	3.75E-10	AMP	FBgn0041710	yellow-f
7.45E-13	0.394526407	0.909	0.954	1.49E-09	AMP	FBgn0034443	cer
1.80E-12	0.444871924	0.969	0.99	3.59E-09	AMP	FBgn0032422	atilla
1.82E-12	0.280480367	0.994	1	3.64E-09	AMP	FBgn0020238	14-3-3epsilon
1.97E-12	0.333203917	0.915	0.995	3.93E-09	AMP	FBgn0260442	rhea
3.25E-12	0.331458745	0.788	0.934	6.51E-09	AMP	FBgn0004574	Rop
3.31E-12	0.263903259	0.999	1	6.62E-09	AMP	FBgn0035499	Chd64
2.02E-11	0.343271138	0.879	0.929	4.04E-08	AMP	FBgn0038299	Spn88Eb
3.15E-11	0.386948204	0.918	0.944	6.30E-08	AMP	FBgn0002719	Men
5.23E-11	0.404371507	0.945	0.959	1.05E-07	AMP	FBgn0086347	Myo31DF
6.36E-11	0.295711088	0.722	0.827	1.27E-07	AMP	FBgn0036697	rogdi
6.37E-11	0.280022735	0.999	1	1.27E-07	AMP	FBgn0000253	Cam
7.06E-11	0.266192733	0.753	0.811	1.41E-07	AMP	FBgn0035715	CG10103
1.27E-10	0.400849056	0.946	0.99	2.54E-07	AMP	FBgn0031327	CG5397
1.59E-10	0.294417336	0.743	0.847	3.17E-07	AMP	FBgn0028671	Vha100-1
2.33E-10	0.310049282	0.712	0.857	4.66E-07	AMP	FBgn0034583	CG10527
3.03E-10	0.396622925	0.912	0.954	6.06E-07	AMP	FBgn0032140	CG13117
3.79E-10	0.400857946	0.917	0.974	7.58E-07	AMP	FBgn0040099	lectin-28C
3.86E-10	0.291170827	0.764	0.893	7.72E-07	AMP	FBgn0259228	C3G
4.60E-10	0.31150622	0.73	0.827	9.20E-07	AMP	FBgn0053056	CG33056
8.61E-10	0.326840821	0.945	0.974	1.72E-06	AMP	FBgn0030955	CG6891
9.08E-10	0.306156012	0.722	0.842	1.82E-06	AMP	FBgn0031190	CG12576
1.12E-09	0.333831454	0.872	0.852	2.25E-06	AMP	FBgn0036043	CG8177
1.82E-09	0.311020754	0.928	0.969	3.64E-06	AMP	FBgn0000579	Eno
2.21E-09	0.371766715	0.872	0.903	4.42E-06	AMP	FBgn0035432	ZnT63C
2.26E-09	0.373530935	0.866	0.944	4.52E-06	AMP	FBgn0013733	shot
2.62E-09	0.291502654	0.786	0.903	5.25E-06	AMP	FBgn0010909	msn
2.82E-09	0.25635201	0.727	0.872	5.65E-06	AMP	FBgn0032405	firl
8.31E-09	0.333435715	0.946	0.954	1.66E-05	AMP	FBgn0029507	Tsp42Ed
9.55E-09	0.329556676	0.948	0.98	1.91E-05	AMP	FBgn0004657	mys
2.03E-08	0.257261086	0.877	0.934	4.05E-05	AMP	FBgn0086532	Spt-I
2.33E-08	0.25495537	0.904	0.918	4.67E-05	AMP	FBgn0041180	Tep4
4.75E-08	0.291432237	0.843	0.893	9.50E-05	AMP	FBgn0261461	RhoGAP18B
5.38E-08	0.278460835	0.793	0.872	0.000107527	AMP	FBgn0262160	CG9932
1.25E-07	0.254907357	0.886	0.918	0.000249937	AMP	FBgn0061198	HSPC300
1.77E-07	0.284626289	0.98	0.995	0.000353998	AMP	FBgn0001105	Gbeta13F
4.28E-07	0.262174618	0.784	0.867	0.000855653	AMP	FBgn0038250	CG3505
5.37E-07	0.252260441	0.69	0.827	0.001074451	AMP	FBgn0000261	Cat
1.58E-06	0.338543242	0.905	0.918	0.003159565	AMP	FBgn0024238	Fim
1.96E-06	0.256076767	0.827	0.903	0.003912315	AMP	FBgn0020278	loco
2.94E-06	0.272715468	0.876	0.954	0.005873483	AMP	FBgn0033367	PPO2
3.56E-06	0.311999745	0.835	0.878	0.007129162	AMP	FBgn0000250	cact
6.78E-06	0.283962556	0.835	0.893	0.013560492	AMP	FBgn0043070	MESK2
8.31E-06	0.275939247	0.357	0.51	0.01662409	AMP	FBgn0036262	CG6910
6.40E-05	0.257120196	0.958	0.969	0.128020889	AMP	FBgn0032731	Swip-1
0.001621184	0.378215758	0.631	0.663	1	AMP	FBgn0035049	Mmp1
