# Supplementary figures and images for: Constitutive activation of cellular immunity underlies the evolution of resistance to infection in Drosophila
Source: eLife journal article supplement (doi:10.7554/elife.59095), 2020-12-24

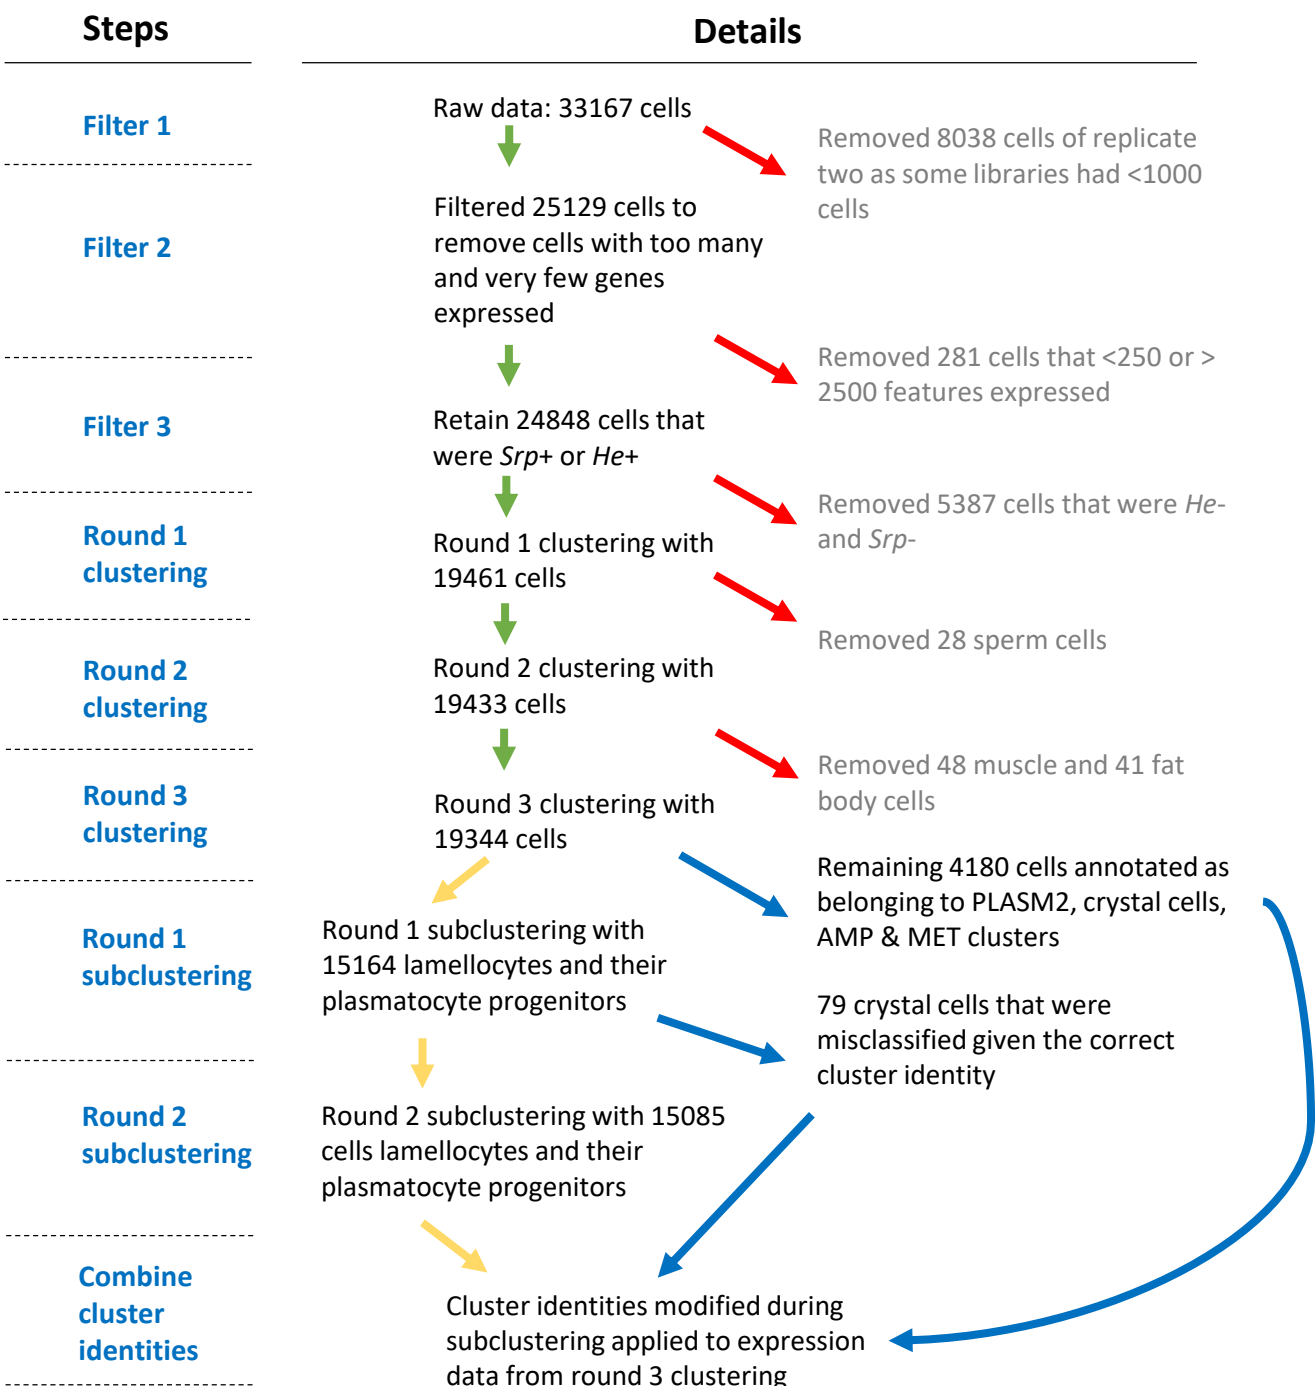

Supplement: supp [file elife-59095-supp-v1.zip]

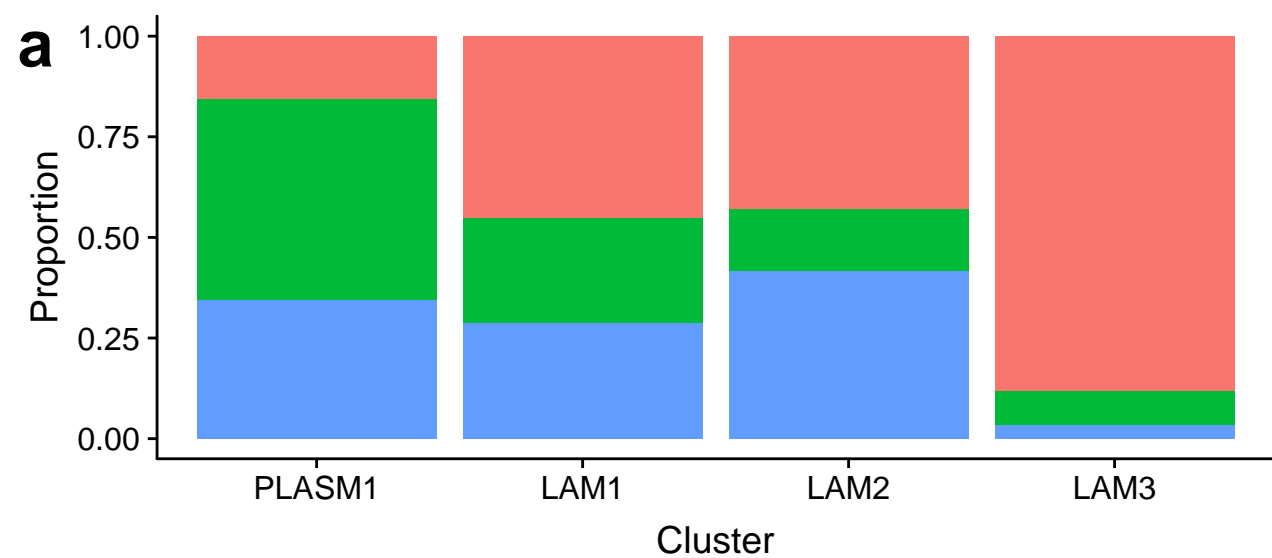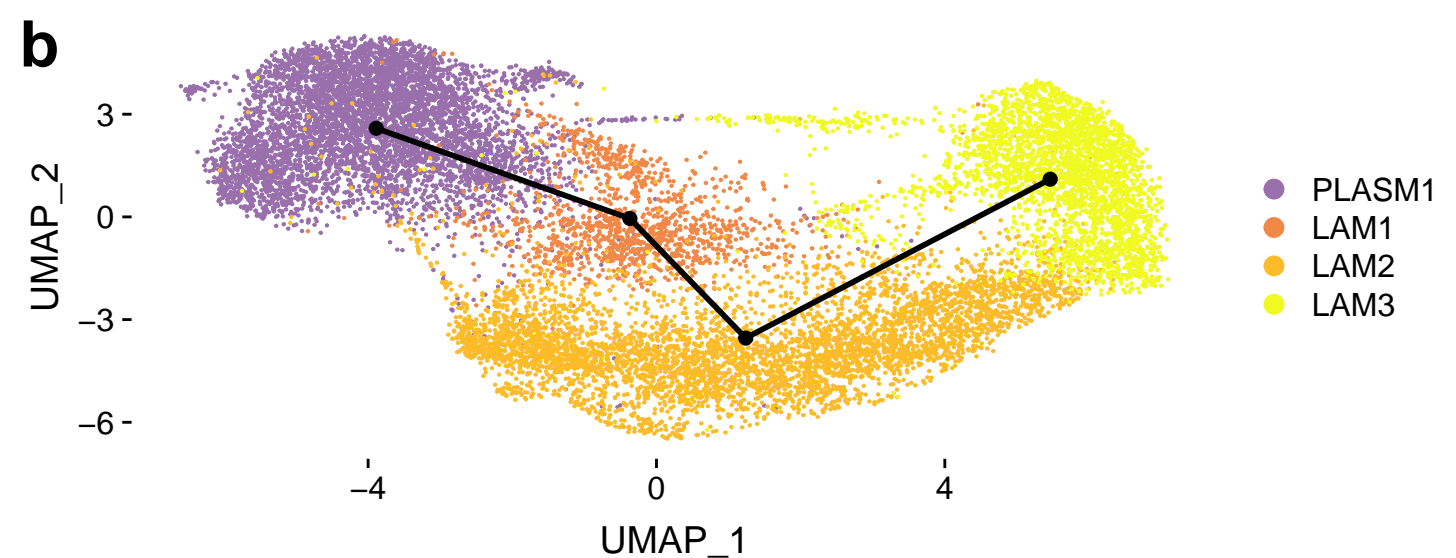

**c**

Top 100 lineage markers

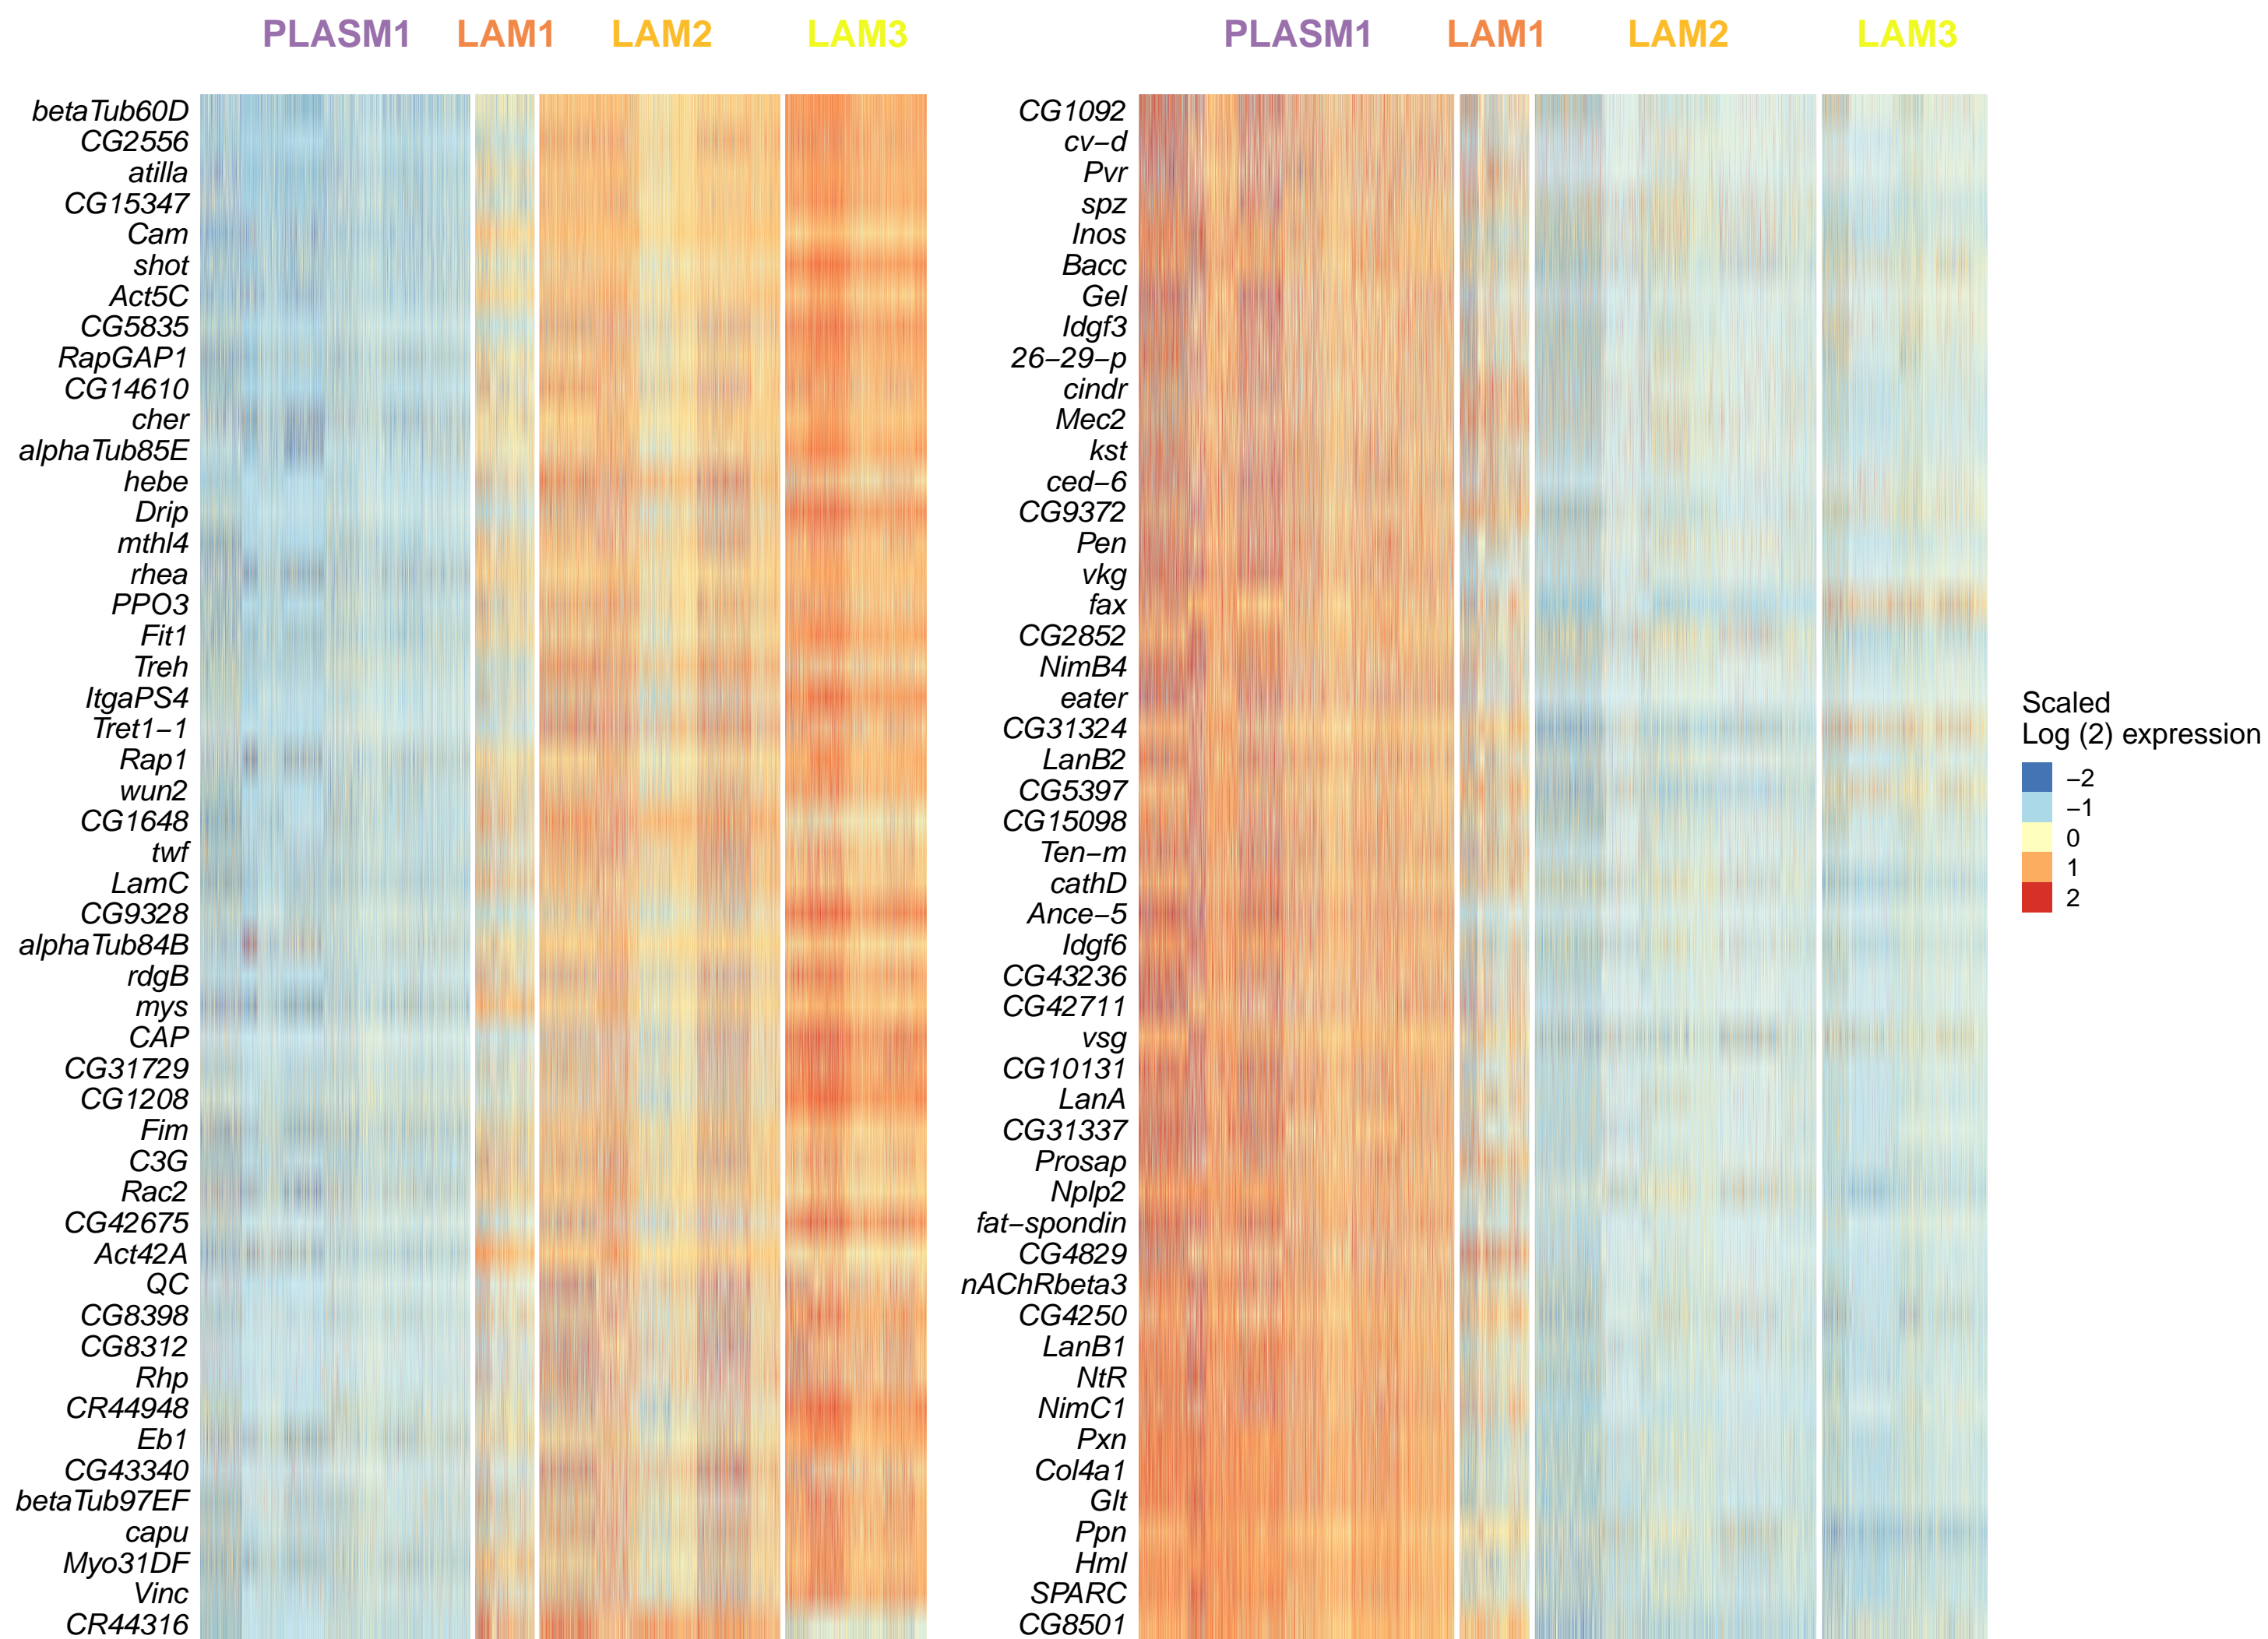

Supplement: supp [file elife-59095-supp-v1.zip]

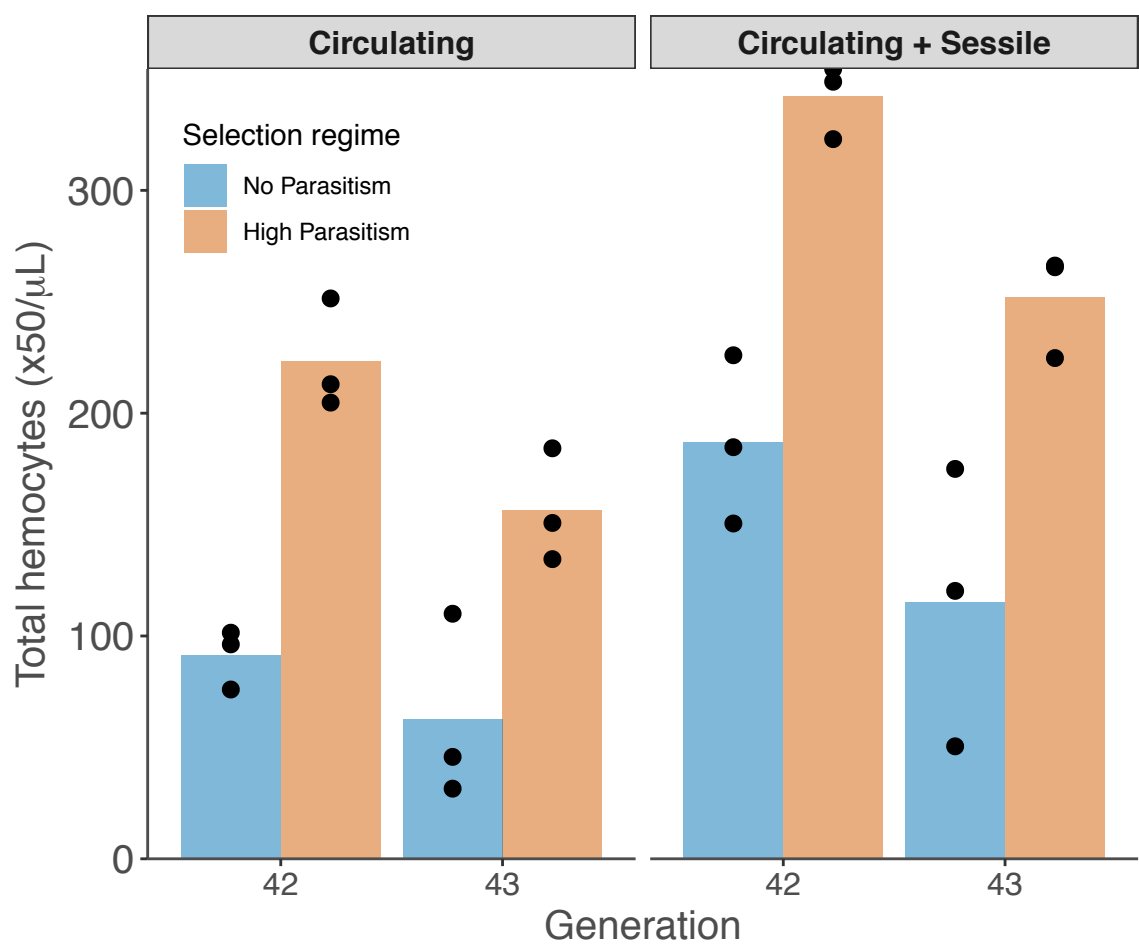

Supplement: supp [file elife-59095-supp-v1.zip]

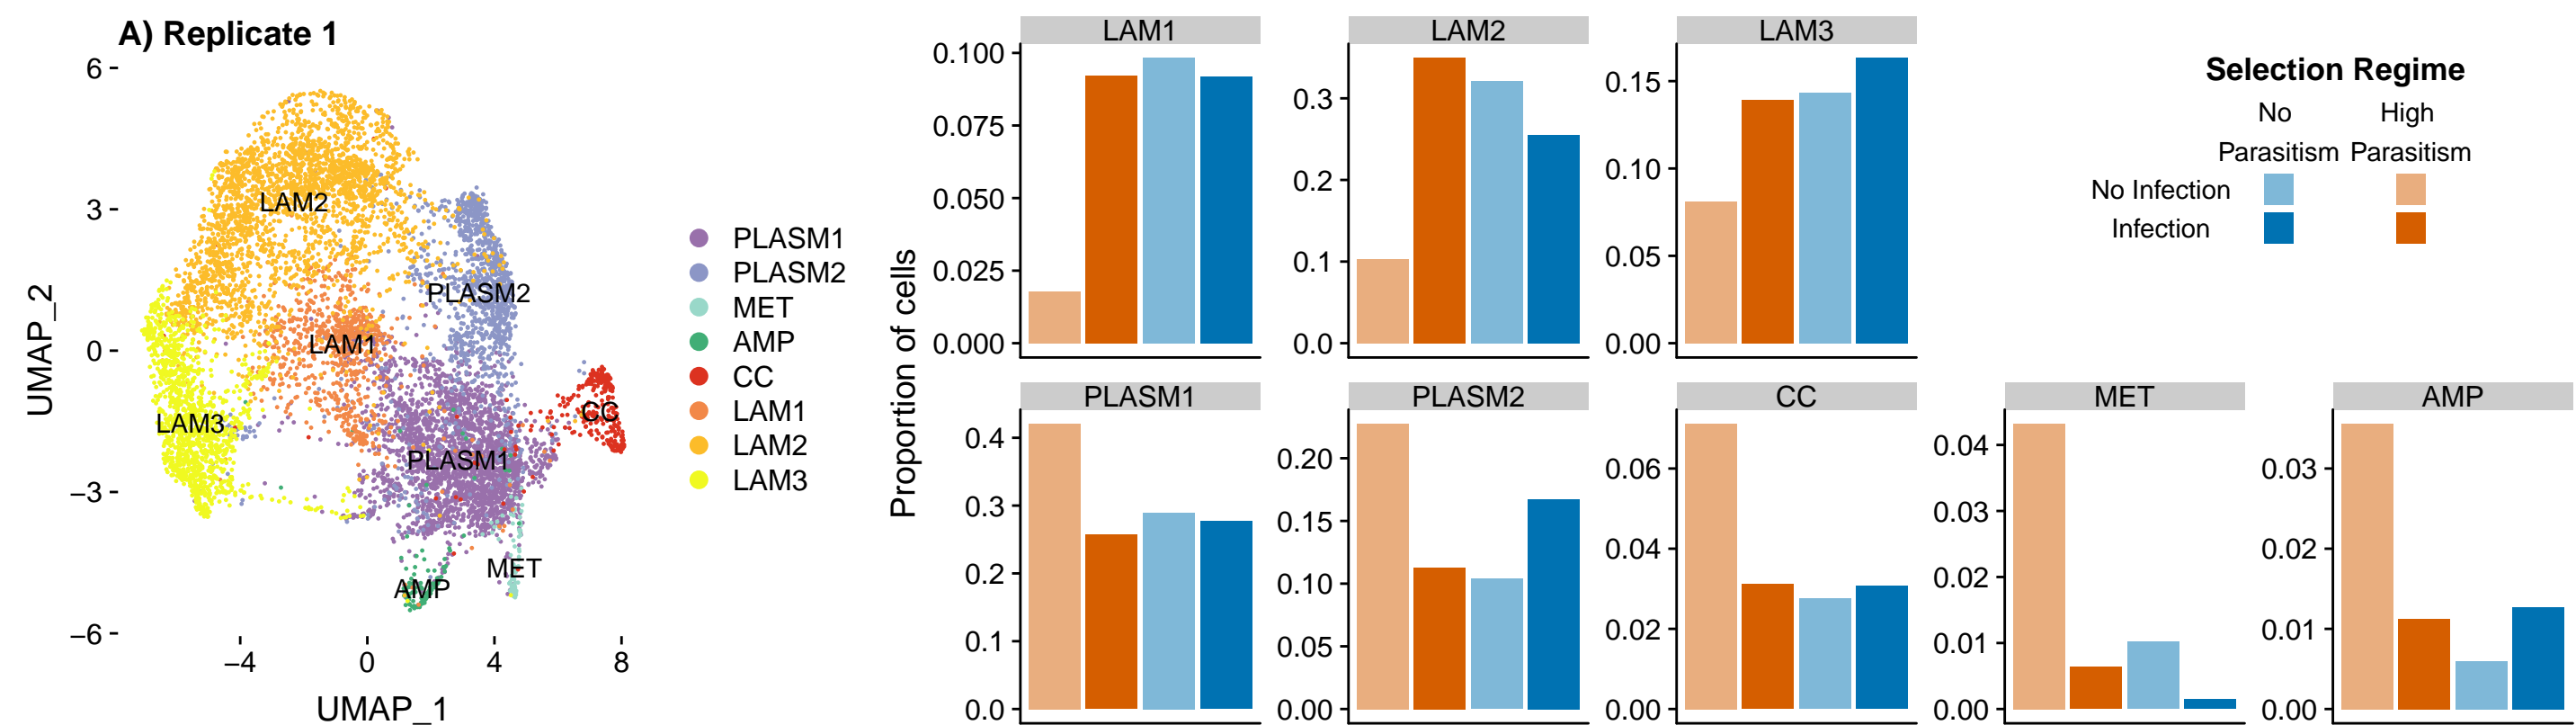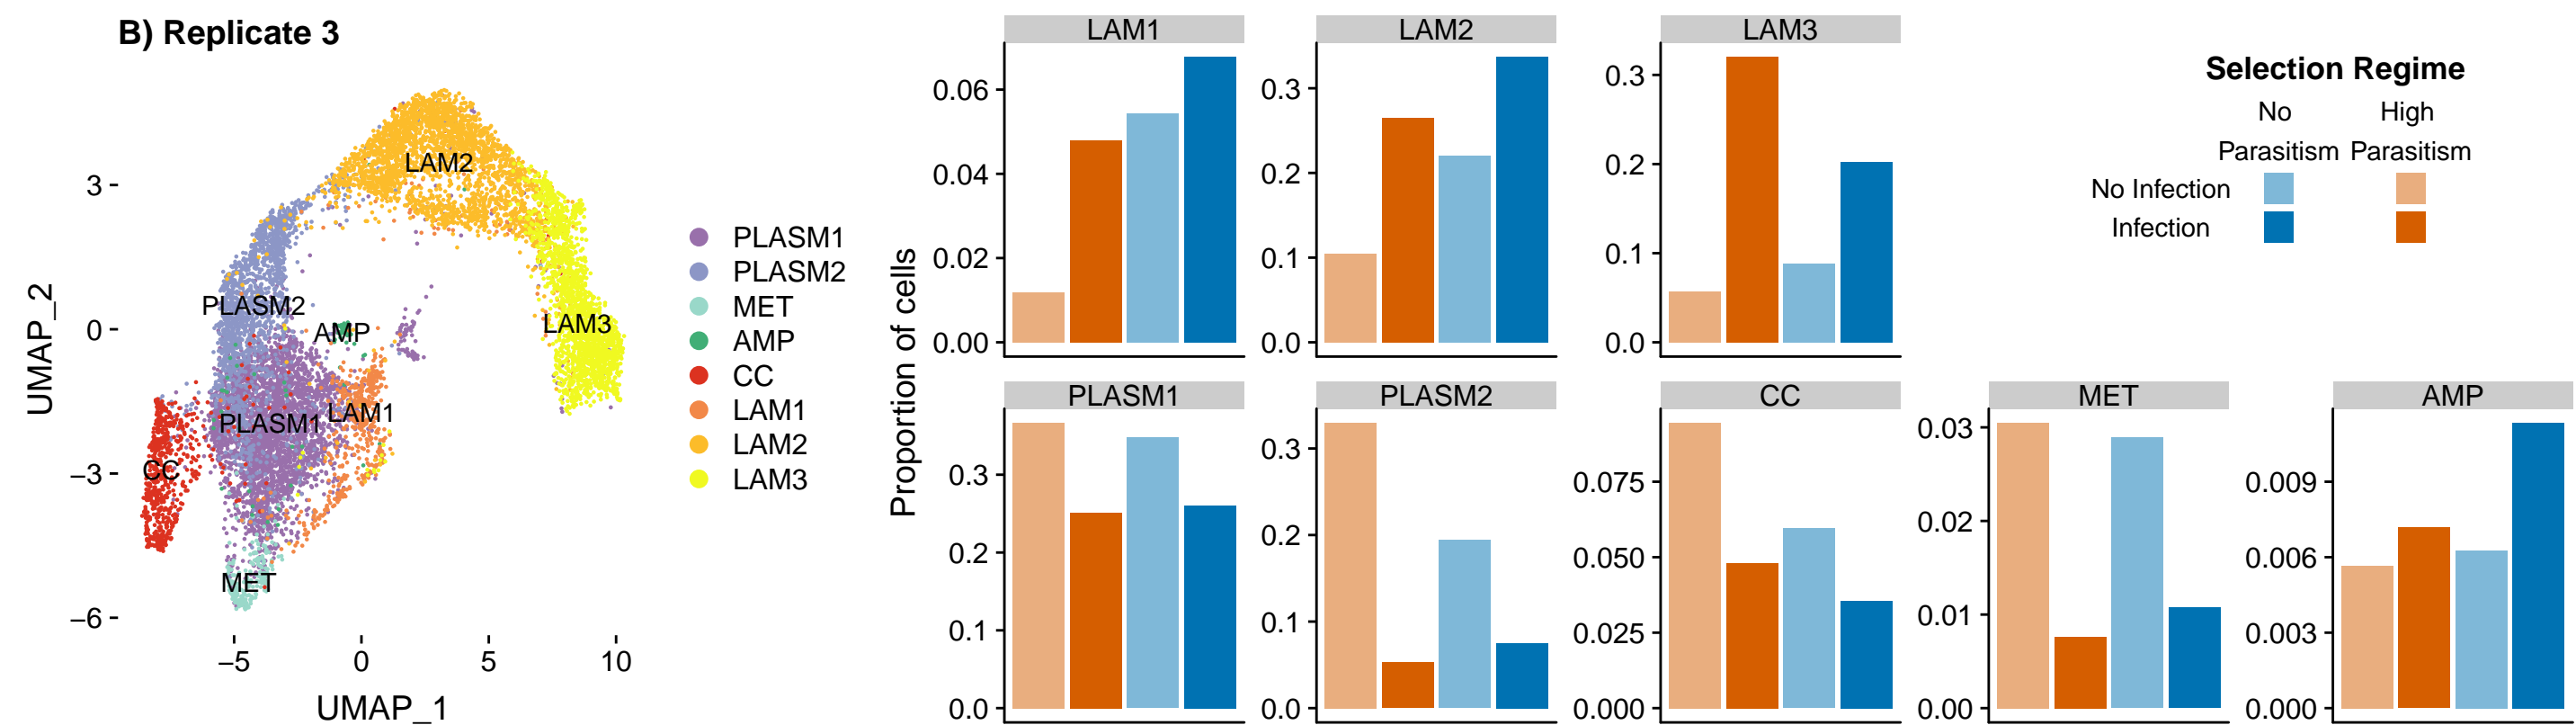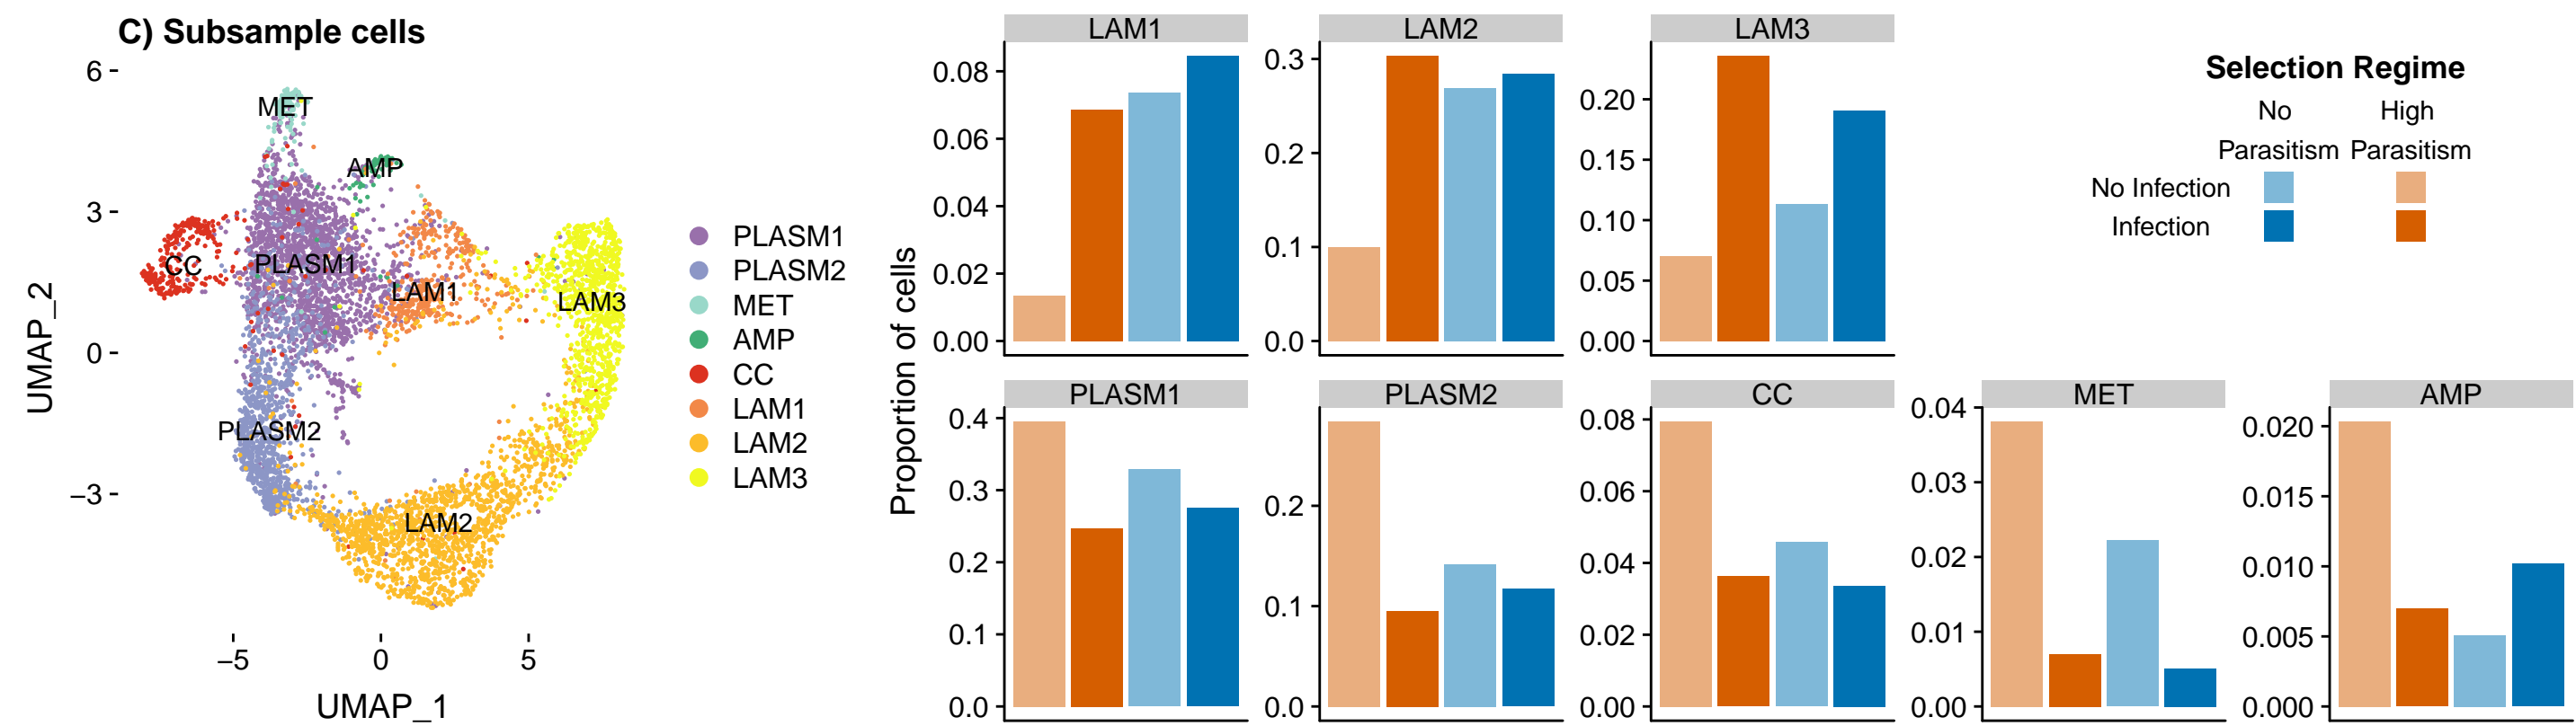

Supplement: supp [file elife-59095-supp-v1.zip]

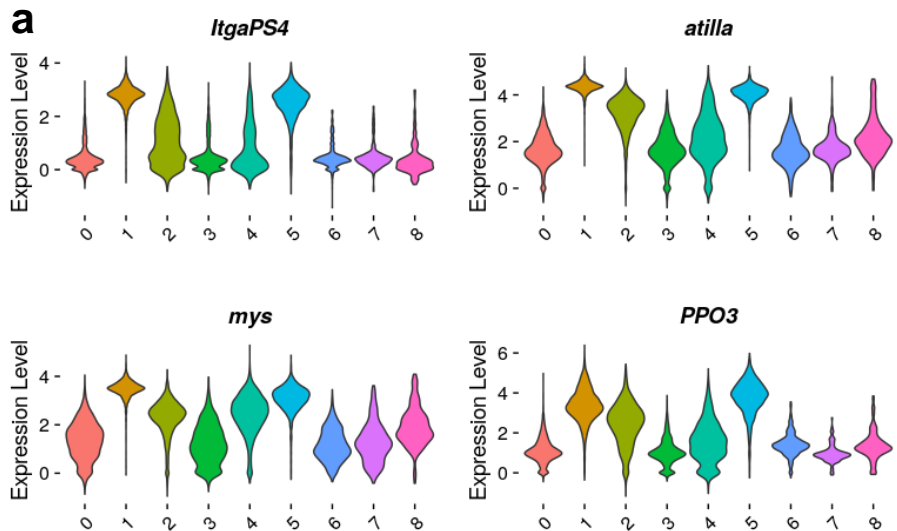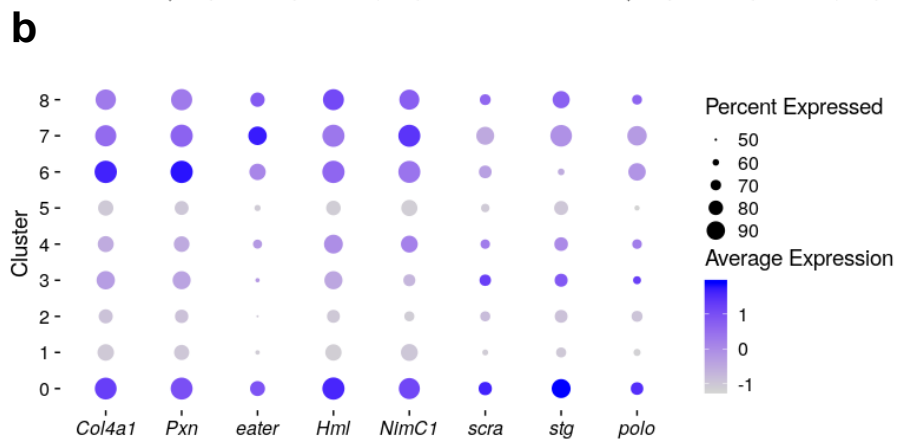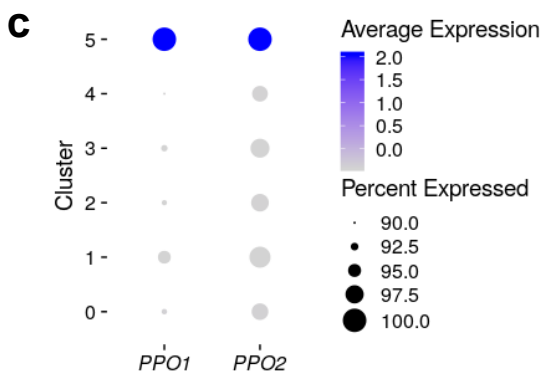

Supplement: supp [file elife-59095-supp-v1.zip]

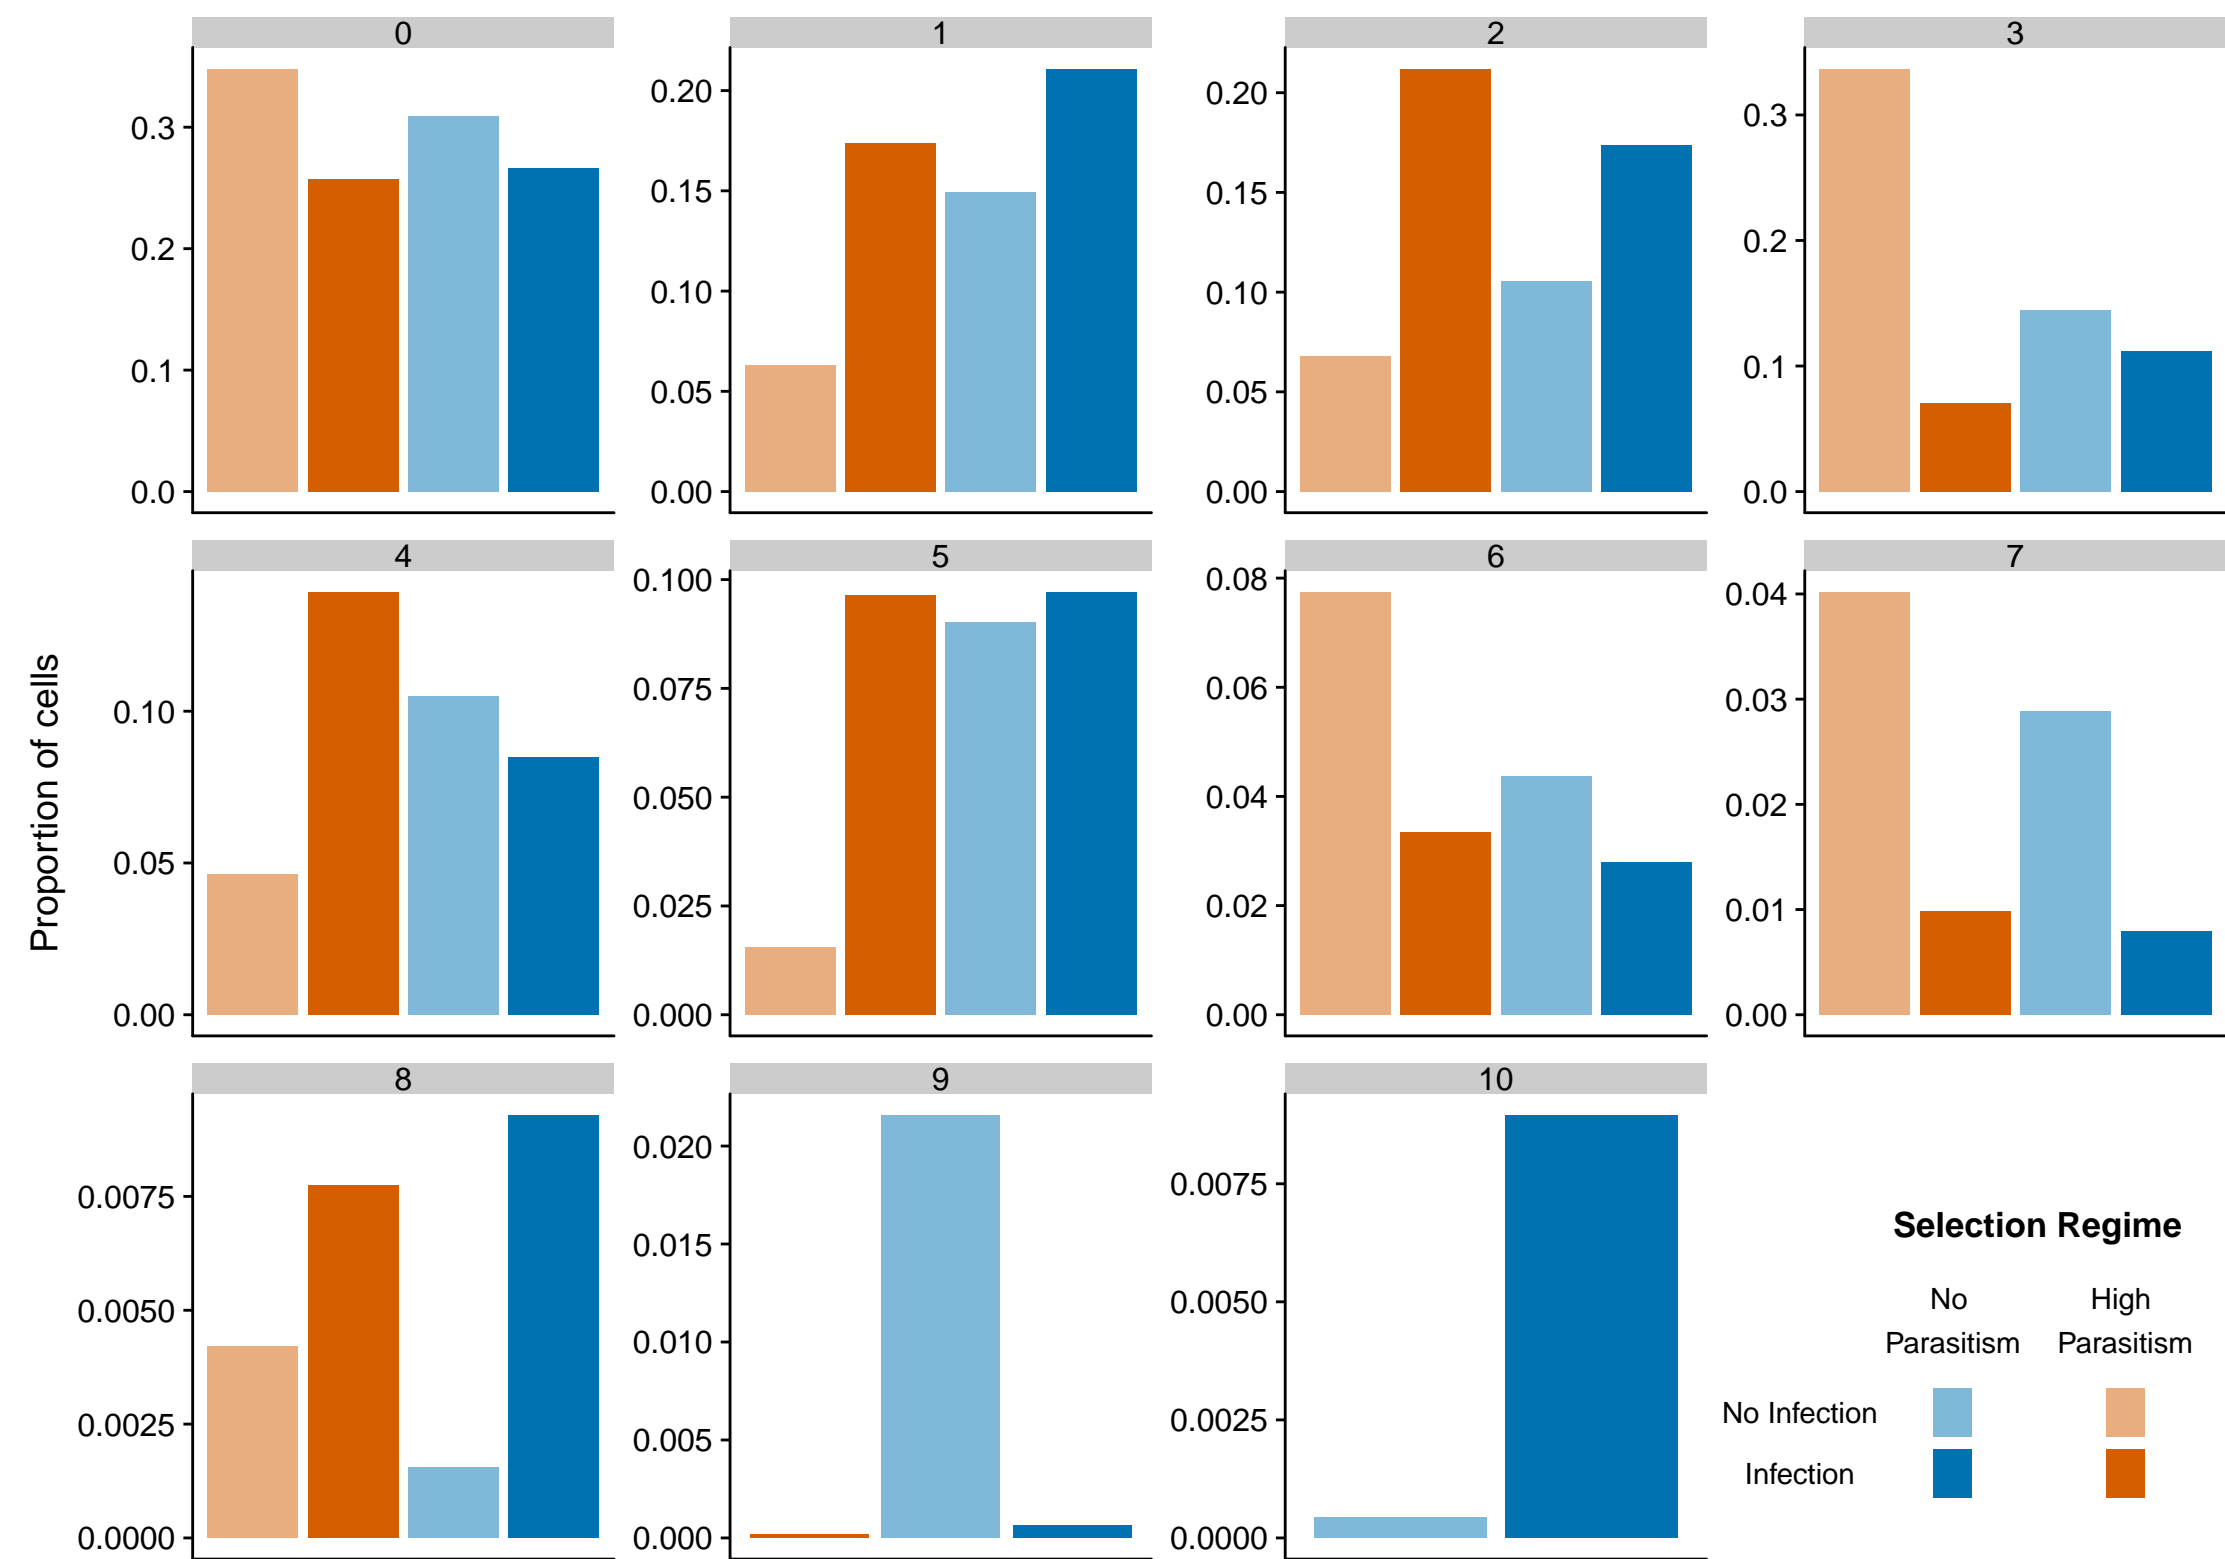

Supplement: supp [file elife-59095-supp-v1.zip]

**A**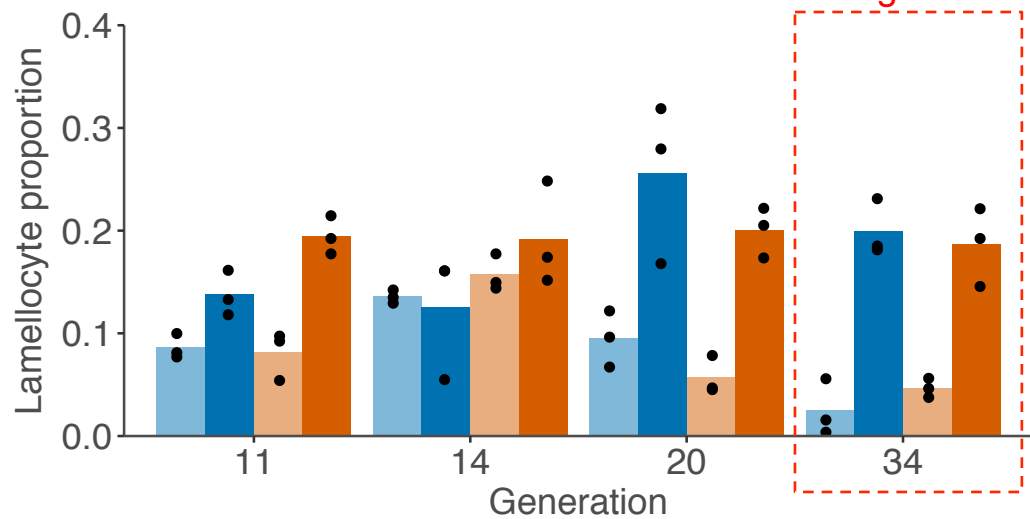**B**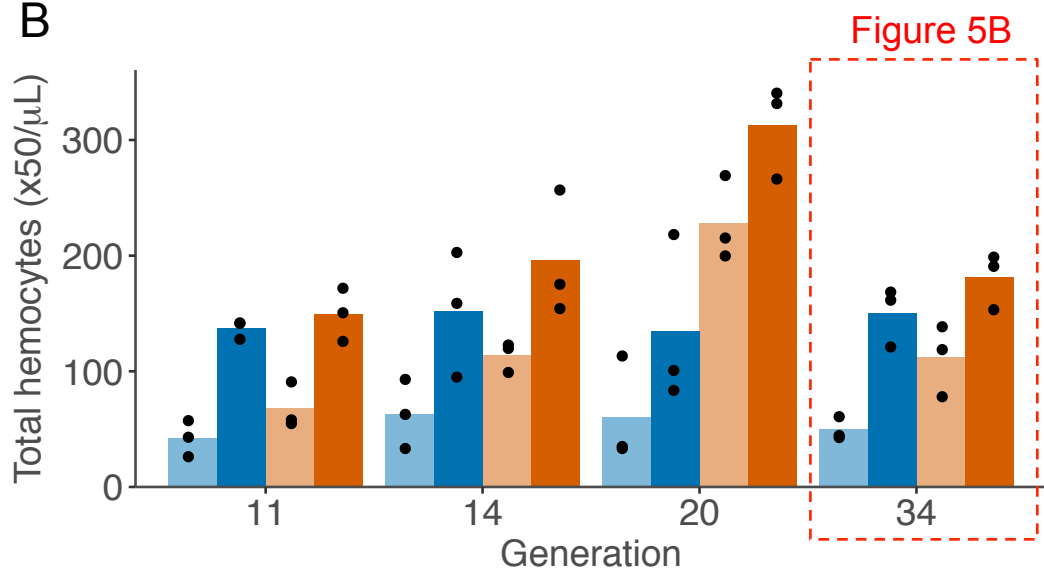

Supplement: supp [file elife-59095-supp-v1.zip]

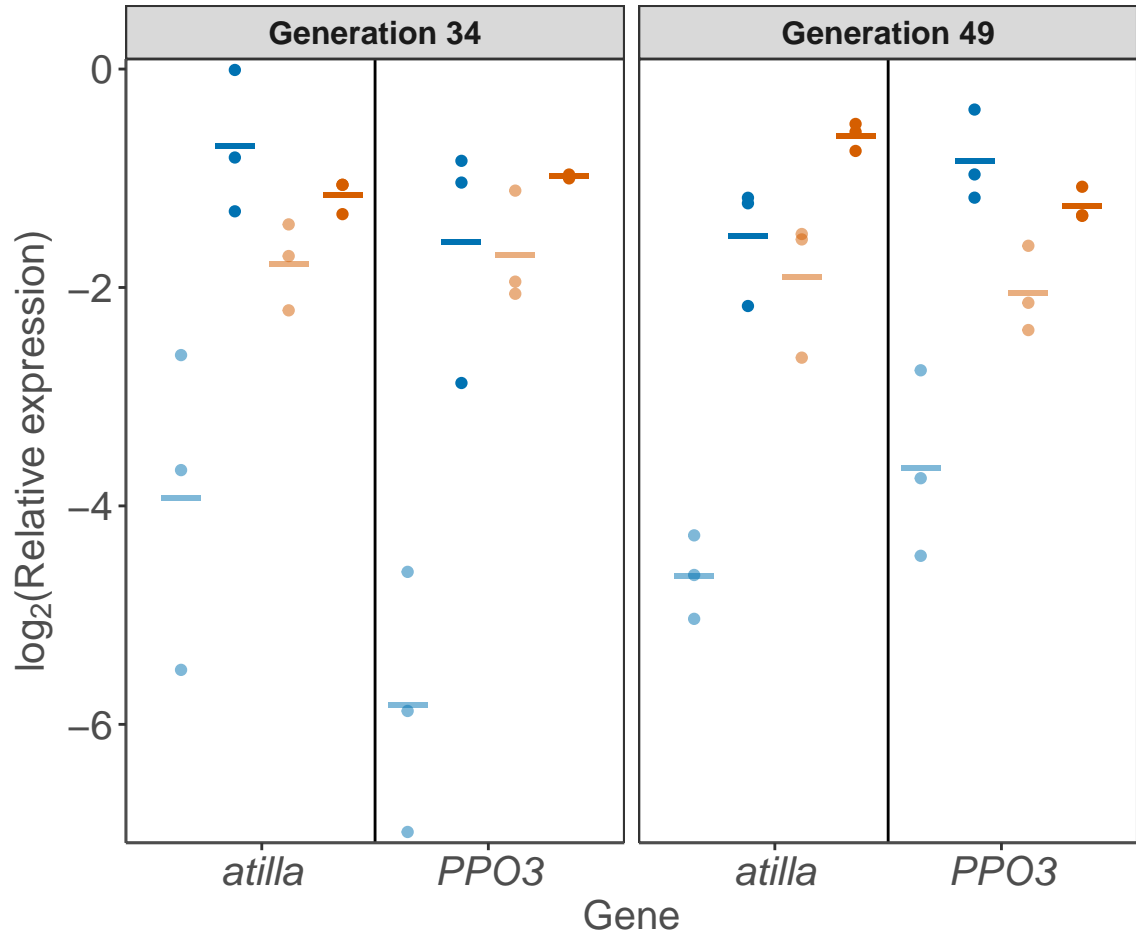

Supplement: supp [file elife-59095-supp-v1.zip]

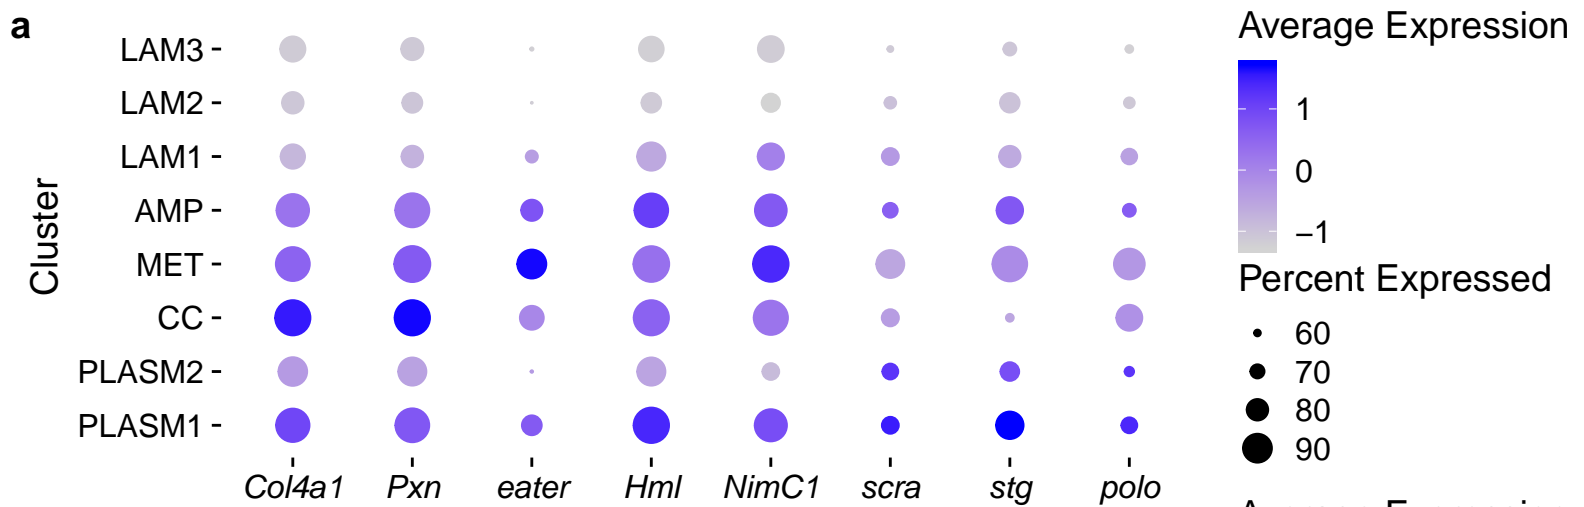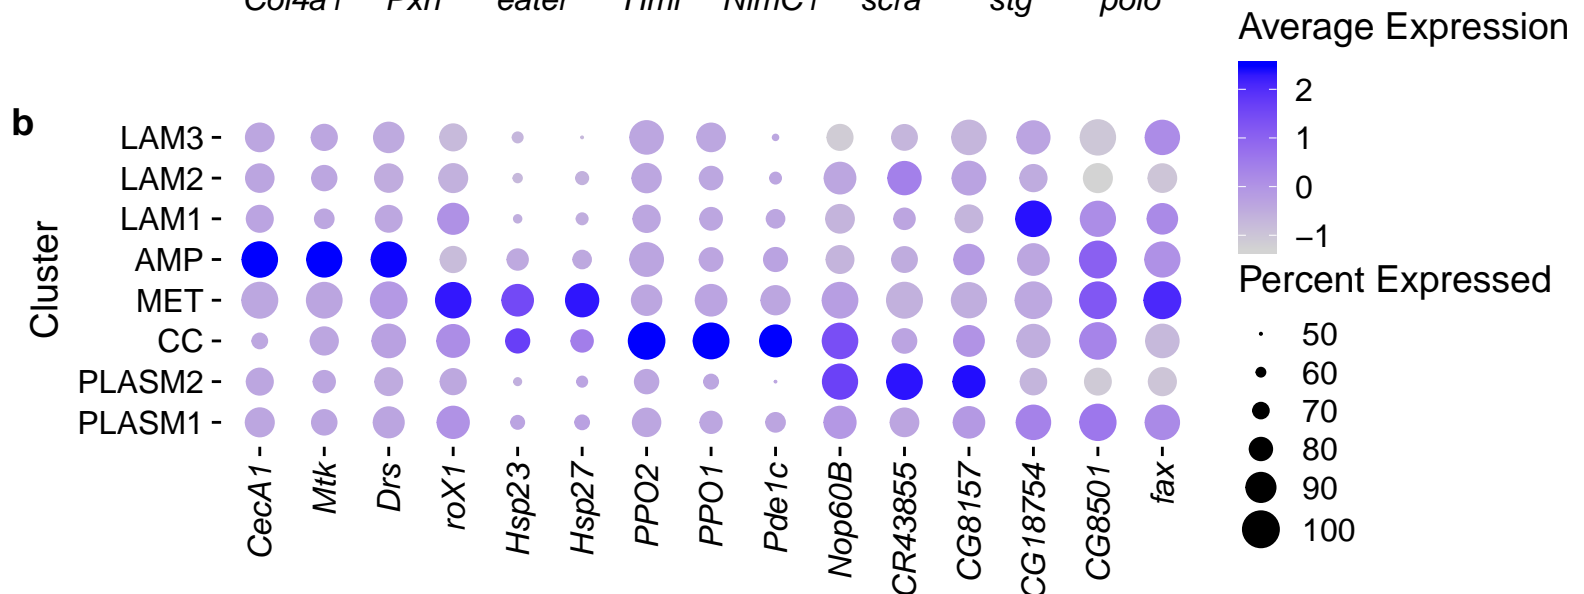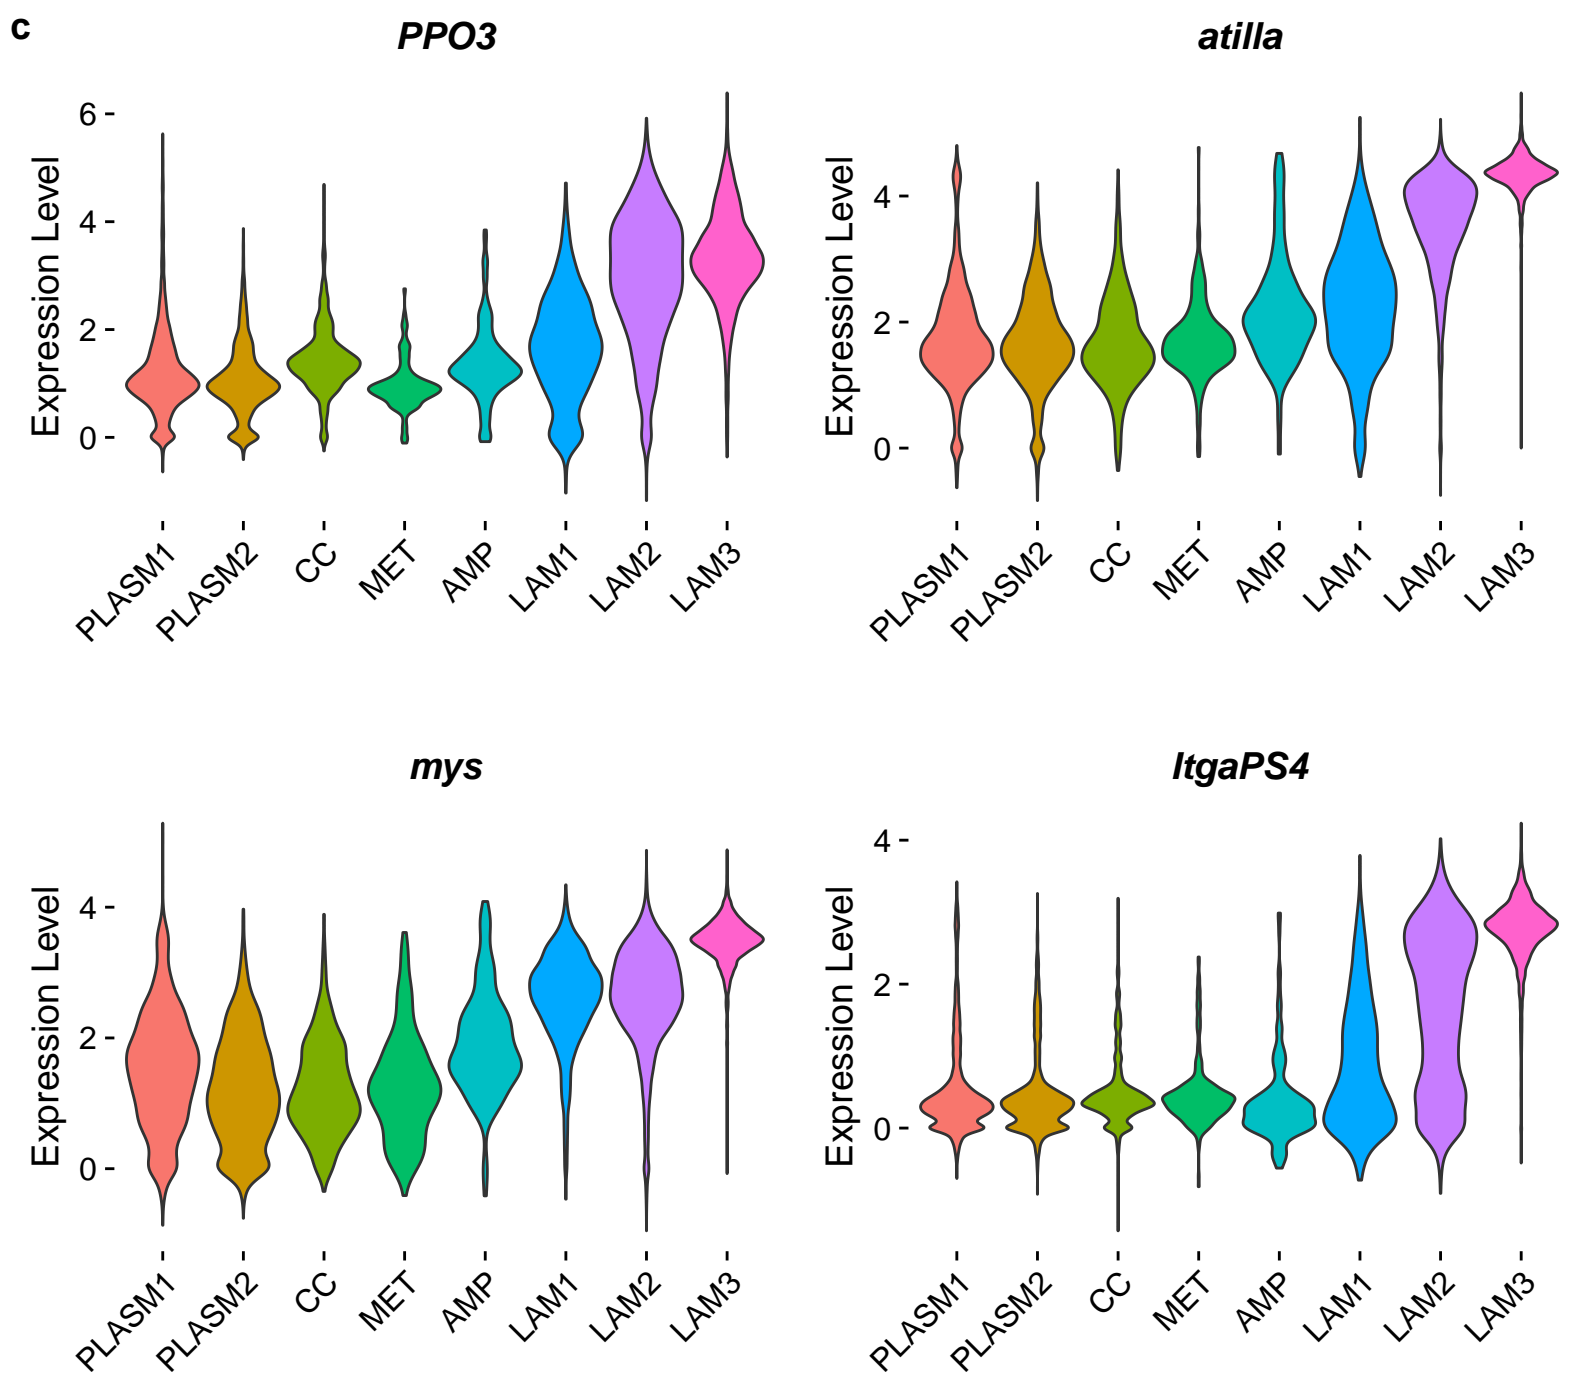

Supplement: supp [file elife-59095-supp-v1.zip]

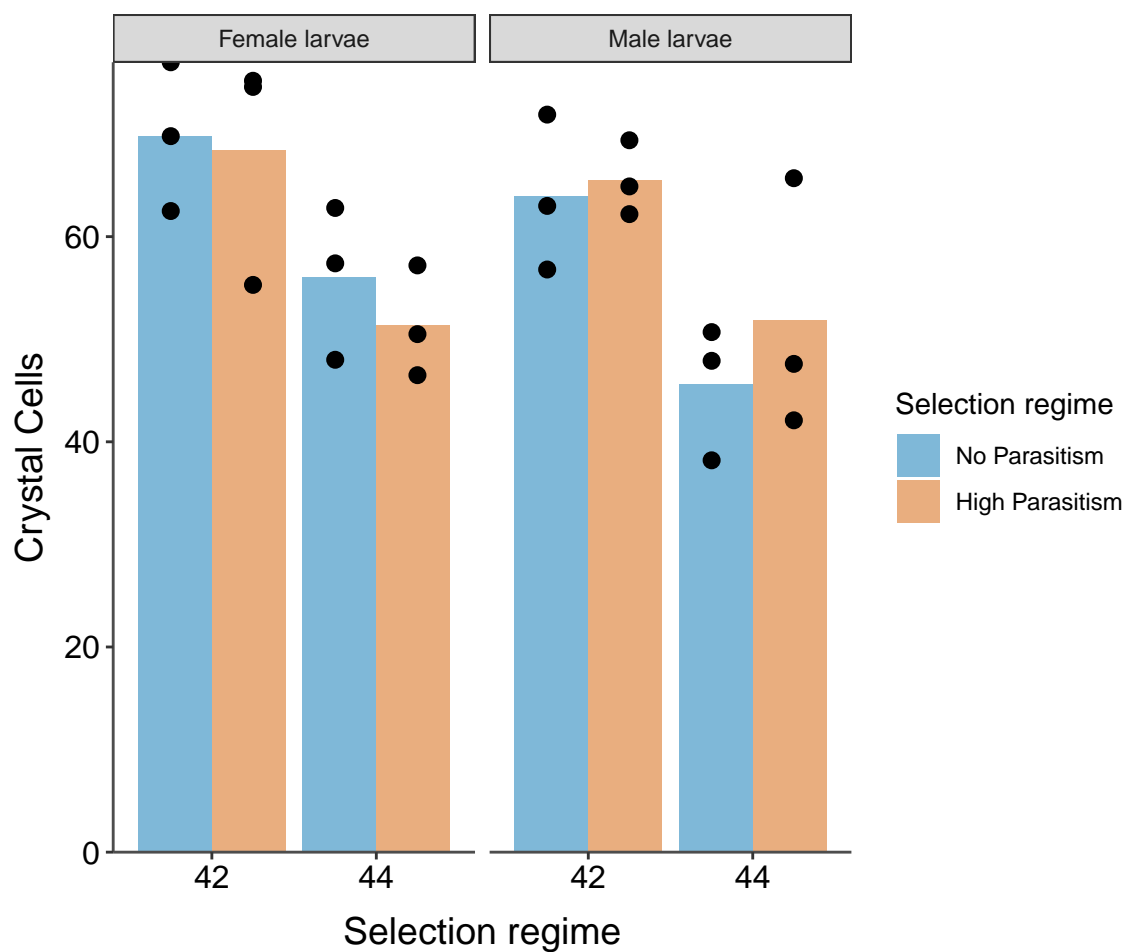

Supplement: supp [file elife-59095-supp-v1.zip]

A

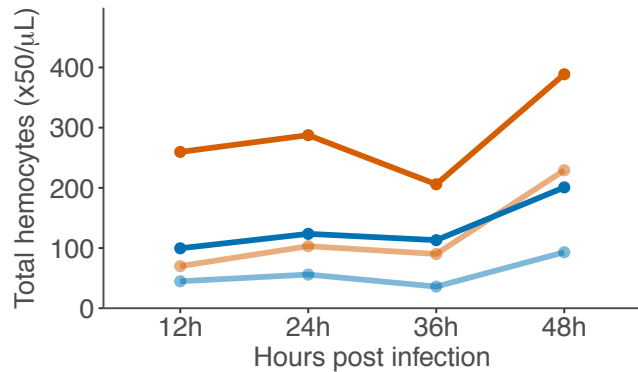

### Selection Regime

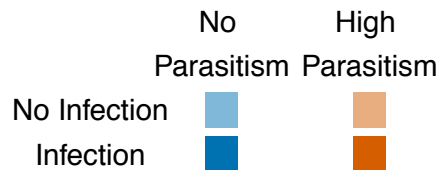

B

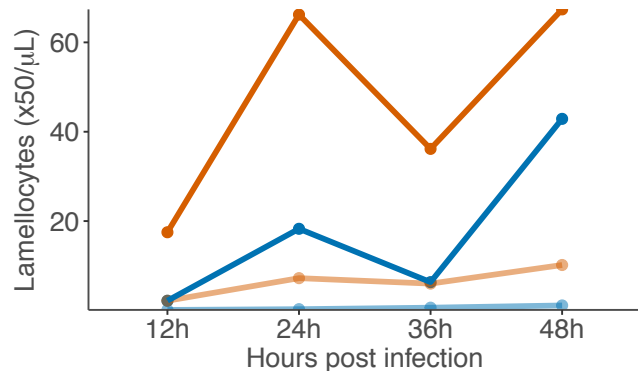

C

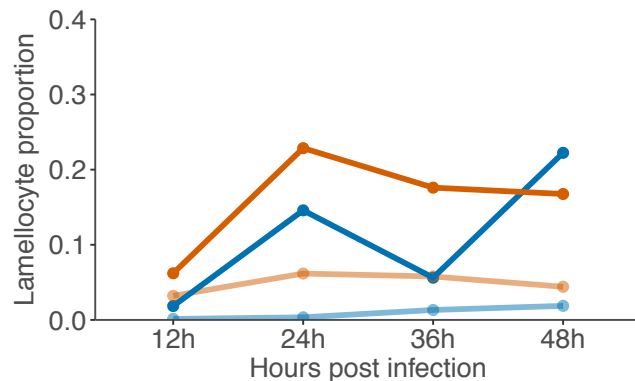

Supplement: supp [file elife-59095-supp-v1.zip]
